# Supplementary material
Source: MDPI journal article supplement (https://www.mdpi.com/2304-6740/6/3/67)

# checkCIF/PLATON report

Structure factors have been supplied for datablock(s) sv0485

THIS REPORT IS FOR GUIDANCE ONLY. IF USED AS PART OF A REVIEW PROCEDURE FOR PUBLICATION, IT SHOULD NOT REPLACE THE EXPERTISE OF AN EXPERIENCED CRYSTALLOGRAPHIC REFEREE.

No syntax errors found.      CIF dictionary      Interpreting this report

## Datablock: sv0485

---

|                 |                    |                                     |
|-----------------|--------------------|-------------------------------------|
| Bond precision: | C-C = 0.0153 A     | Wavelength=1.54186                  |
| Cell:           | a=10.791(1)        | b=10.7753(10)      c=16.8369(16)    |
|                 | alpha=73.904(7)    | beta=71.663(7)      gamma=69.620(7) |
| Temperature:    | 100 K              |                                     |
|                 | Calculated         | Reported                            |
| Volume          | 1710.8(3)          | 1710.8(3)                           |
| Space group     | P -1               | P -1                                |
| Hall group      | -P 1               | -P 1                                |
| Moiety formula  | C30 H50 Fe K O6 P3 | ?                                   |
| Sum formula     | C30 H50 Fe K O6 P3 | C30 H50 Fe K O6 P3                  |
| Mr              | 694.56             | 694.56                              |
| Dx,g cm-3       | 1.348              | 1.348                               |
| Z               | 2                  | 2                                   |
| Mu (mm-1)       | 6.265              | 6.265                               |
| F000            | 736.0              | 736.0                               |
| F000'           | 737.97             |                                     |
| h,k,lmax        | 13,13,20           | 13,13,20                            |
| Nref            | 6343               | 6198                                |
| Tmin,Tmax       | 0.534,0.882        | 0.451,0.887                         |
| Tmin'           | 0.328              |                                     |

Correction method= # Reported T Limits: Tmin=0.451 Tmax=0.887  
AbsCorr = INTEGRATION

Data completeness= 0.977      Theta(max)= 68.998

R(reflections)= 0.1104( 4302)      wR2(reflections)= 0.3201( 6198)

S = 1.024      Npar= 376

---

The following ALERTS were generated. Each ALERT has the format  
**test-name\_ALERT\_alert-type\_alert-level.**  
Click on the hyperlinks for more details of the test.

---

### Alert level B

|                   |                                       |                             |         |        |
|-------------------|---------------------------------------|-----------------------------|---------|--------|
| PLAT213_ALERT_2_B | Atom C20                              | has ADP max/min Ratio ..... | 4.6     | prolat |
| PLAT234_ALERT_4_B | Large Hirshfeld Difference O2         | --C21                       | 0.26    | Ang.   |
| PLAT341_ALERT_3_B | Low Bond Precision on C-C Bonds ..... |                             | 0.01532 | Ang.   |

---

### Alert level C

|                   |                                                  |                             |       |             |
|-------------------|--------------------------------------------------|-----------------------------|-------|-------------|
| PLAT082_ALERT_2_C | High R1 Value .....                              |                             | 0.11  | Report      |
| PLAT084_ALERT_3_C | High wR2 Value (i.e. > 0.25) .....               |                             | 0.32  | Report      |
| PLAT094_ALERT_2_C | Ratio of Maximum / Minimum Residual Density .... |                             | 2.78  | Report      |
| PLAT155_ALERT_4_C | The Triclinic Unitcell is NOT Reduced .....      |                             |       | Please Do ! |
| PLAT213_ALERT_2_C | Atom C19                                         | has ADP max/min Ratio ..... | 3.3   | oblate      |
| PLAT213_ALERT_2_C | Atom C21                                         | has ADP max/min Ratio ..... | 3.4   | prolat      |
| PLAT220_ALERT_2_C | Non-Solvent Resd 1 C                             | Ueq(max)/Ueq(min) Range     | 5.0   | Ratio       |
| PLAT222_ALERT_3_C | Non-Solv. Resd 1 H                               | Uiso(max)/Uiso(min) Range   | 5.1   | Ratio       |
| PLAT230_ALERT_2_C | Hirshfeld Test Diff for O1                       | --C30                       | 6.7   | s.u.        |
| PLAT230_ALERT_2_C | Hirshfeld Test Diff for O5                       | --C26                       | 6.3   | s.u.        |
| PLAT230_ALERT_2_C | Hirshfeld Test Diff for C27                      | --C28                       | 5.6   | s.u.        |
| PLAT230_ALERT_2_C | Hirshfeld Test Diff for C29                      | --C30                       | 5.4   | s.u.        |
| PLAT234_ALERT_4_C | Large Hirshfeld Difference O2                    | --C20                       | 0.23  | Ang.        |
| PLAT234_ALERT_4_C | Large Hirshfeld Difference O4                    | --C24                       | 0.17  | Ang.        |
| PLAT234_ALERT_4_C | Large Hirshfeld Difference O6                    | --C28                       | 0.17  | Ang.        |
| PLAT234_ALERT_4_C | Large Hirshfeld Difference C19                   | --C20                       | 0.25  | Ang.        |
| PLAT234_ALERT_4_C | Large Hirshfeld Difference C21                   | --C22                       | 0.22  | Ang.        |
| PLAT234_ALERT_4_C | Large Hirshfeld Difference C25                   | --C26                       | 0.19  | Ang.        |
| PLAT241_ALERT_2_C | High 'MainMol' Ueq as Compared to Neighbors of   | O5                          | Check |             |
| PLAT241_ALERT_2_C | High 'MainMol' Ueq as Compared to Neighbors of   | C20                         | Check |             |
| PLAT241_ALERT_2_C | High 'MainMol' Ueq as Compared to Neighbors of   | C21                         | Check |             |
| PLAT241_ALERT_2_C | High 'MainMol' Ueq as Compared to Neighbors of   | C23                         | Check |             |
| PLAT241_ALERT_2_C | High 'MainMol' Ueq as Compared to Neighbors of   | C25                         | Check |             |
| PLAT242_ALERT_2_C | Low 'MainMol' Ueq as Compared to Neighbors of    | K1                          | Check |             |
| PLAT242_ALERT_2_C | Low 'MainMol' Ueq as Compared to Neighbors of    | C15                         | Check |             |
| PLAT242_ALERT_2_C | Low 'MainMol' Ueq as Compared to Neighbors of    | C26                         | Check |             |
| PLAT360_ALERT_2_C | Short C(sp3)-C(sp3) Bond C25                     | - C26                       | 1.42  | Ang.        |
| PLAT360_ALERT_2_C | Short C(sp3)-C(sp3) Bond C29                     | - C30                       | 1.38  | Ang.        |
| PLAT911_ALERT_3_C | Missing FCF Refl Between Thmin & STh/L=          | 0.600                       | 102   | Report      |
| PLAT918_ALERT_3_C | Reflection(s) with I(obs) much Smaller I(calc) . |                             | 1     | Check       |
| PLAT971_ALERT_2_C | Check Calcd Resid. Dens. 1.42A                   | From P1                     | 1.68  | eA-3        |
| PLAT971_ALERT_2_C | Check Calcd Resid. Dens. 0.92A                   | From Fe1                    | 1.54  | eA-3        |
| PLAT973_ALERT_2_C | Check Calcd Positive Resid. Density on           | Fe1                         | 1.26  | eA-3        |
| PLAT978_ALERT_2_C | Number C-C Bonds with Positive Residual Density. |                             | 0     | Info        |

---

### Alert level G

|                   |                                                  |               |       |          |
|-------------------|--------------------------------------------------|---------------|-------|----------|
| PLAT072_ALERT_2_G | SHELXL First Parameter in WGHT Unusually Large   |               | 0.20  | Report   |
| PLAT083_ALERT_2_G | SHELXL Second Parameter in WGHT Unusually Large  |               | 6.74  | Why ?    |
| PLAT154_ALERT_1_G | The s.u.'s on the Cell Angles are Equal ..(Note) |               | 0.007 | Degree   |
| PLAT793_ALERT_4_G | Model has Chirality at P3                        | (Centro SPGR) |       | R Verify |
| PLAT794_ALERT_5_G | Tentative Bond Valency for Fe1                   | (II)          | 2.15  | Info     |
| PLAT912_ALERT_4_G | Missing # of FCF Reflections Above STh/L=        | 0.600         | 44    | Note     |
| PLAT960_ALERT_3_G | Number of Intensities with I < - 2*sig(I) ...    |               | 16    | Check    |

---

0 **ALERT level A** = Most likely a serious problem - resolve or explain

3 **ALERT level B** = A potentially serious problem, consider carefully

34 **ALERT level C** = Check. Ensure it is not caused by an omission or oversight

7 **ALERT level G** = General information/check it is not something unexpected

1 **ALERT type 1** CIF construction/syntax error, inconsistent or missing data

26 ALERT type 2 Indicator that the structure model may be wrong or deficient  
 6 ALERT type 3 Indicator that the structure quality may be low  
 10 ALERT type 4 Improvement, methodology, query or suggestion  
 1 ALERT type 5 Informative message, check

---

## Validation response form

Please find below a validation response form (VRF) that can be filled in and pasted into your CIF.

```
# start Validation Reply Form
_vrf_PLAT082_sv0485
;
PROBLEM: High R1 Value ..... 0.11 Report
RESPONSE: ...
;
_vrf_PLAT084_sv0485
;
PROBLEM: High wR2 Value (i.e. > 0.25) ..... 0.32 Report
RESPONSE: ...
;
_vrf_PLAT094_sv0485
;
PROBLEM: Ratio of Maximum / Minimum Residual Density .... 2.78 Report
RESPONSE: ...
;
_vrf_PLAT155_sv0485
;
PROBLEM: The Triclinic Unitcell is NOT Reduced ..... Please Do !
RESPONSE: ...
;
_vrf_PLAT213_sv0485
;
PROBLEM: Atom C19          has ADP max/min Ratio ..... 3.3 oblate
RESPONSE: ...
;
_vrf_PLAT220_sv0485
;
PROBLEM: Non-Solvent  Resd 1  C    Ueq(max)/Ueq(min) Range  5.0 Ratio
RESPONSE: ...
;
_vrf_PLAT222_sv0485
;
PROBLEM: Non-Solv.  Resd 1  H    Uiso(max)/Uiso(min) Range  5.1 Ratio
RESPONSE: ...
;
_vrf_PLAT230_sv0485
;
PROBLEM: Hirshfeld Test Diff for  O1      --C30      .      6.7 s.u.
RESPONSE: ...
;
_vrf_PLAT234_sv0485
;
PROBLEM: Large Hirshfeld Difference O2      --C20      0.23 Ang.
RESPONSE: ...
;
_vrf_PLAT241_sv0485
;
PROBLEM: High      'MainMol' Ueq as Compared to Neighbors of      05 Check
RESPONSE: ...
;
```

\_vrf\_PLAT242\_sv0485  
;  
PROBLEM: Low 'MainMol' Ueq as Compared to Neighbors of K1 Check  
RESPONSE: ...  
;  
\_vrf\_PLAT360\_sv0485  
;  
PROBLEM: Short C(sp3)-C(sp3) Bond C25 - C26 . 1.42 Ang.  
RESPONSE: ...  
;  
\_vrf\_PLAT911\_sv0485  
;  
PROBLEM: Missing FCF Refl Between Thmin & STh/L= 0.600 102 Report  
RESPONSE: ...  
;  
\_vrf\_PLAT918\_sv0485  
;  
PROBLEM: Reflection(s) with I(obs) much Smaller I(calc) . 1 Check  
RESPONSE: ...  
;  
\_vrf\_PLAT971\_sv0485  
;  
PROBLEM: Check Calcd Resid. Dens. 1.42A From P1 1.68 eA-3  
RESPONSE: ...  
;  
\_vrf\_PLAT973\_sv0485  
;  
PROBLEM: Check Calcd Positive Resid. Density on Fe1 1.26 eA-3  
RESPONSE: ...  
;  
\_vrf\_PLAT978\_sv0485  
;  
PROBLEM: Number C-C Bonds with Positive Residual Density. 0 Info  
RESPONSE: ...  
;  
# end Validation Reply Form

---

It is advisable to attempt to resolve as many as possible of the alerts in all categories. Often the minor alerts point to easily fixed oversights, errors and omissions in your CIF or refinement strategy, so attention to these fine details can be worthwhile. In order to resolve some of the more serious problems it may be necessary to carry out additional measurements or structure refinements. However, the purpose of your study may justify the reported deviations and the more serious of these should normally be commented upon in the discussion or experimental section of a paper or in the "special\_details" fields of the CIF. checkCIF was carefully designed to identify outliers and unusual parameters, but every test has its limitations and alerts that are not important in a particular case may appear. Conversely, the absence of alerts does not guarantee there are no aspects of the results needing attention. It is up to the individual to critically assess their own results and, if necessary, seek expert advice.

### **Publication of your CIF in IUCr journals**

A basic structural check has been run on your CIF. These basic checks will be run on all CIFs submitted for publication in IUCr journals (*Acta Crystallographica*, *Journal of Applied Crystallography*, *Journal of Synchrotron Radiation*); however, if you intend to submit to *Acta Crystallographica Section C* or *E* or *IUCrData*, you should make sure that full publication checks are run on the final version of your CIF prior to submission.

### **Publication of your CIF in other journals**

Please refer to the *Notes for Authors* of the relevant journal for any special instructions relating to CIF submission.

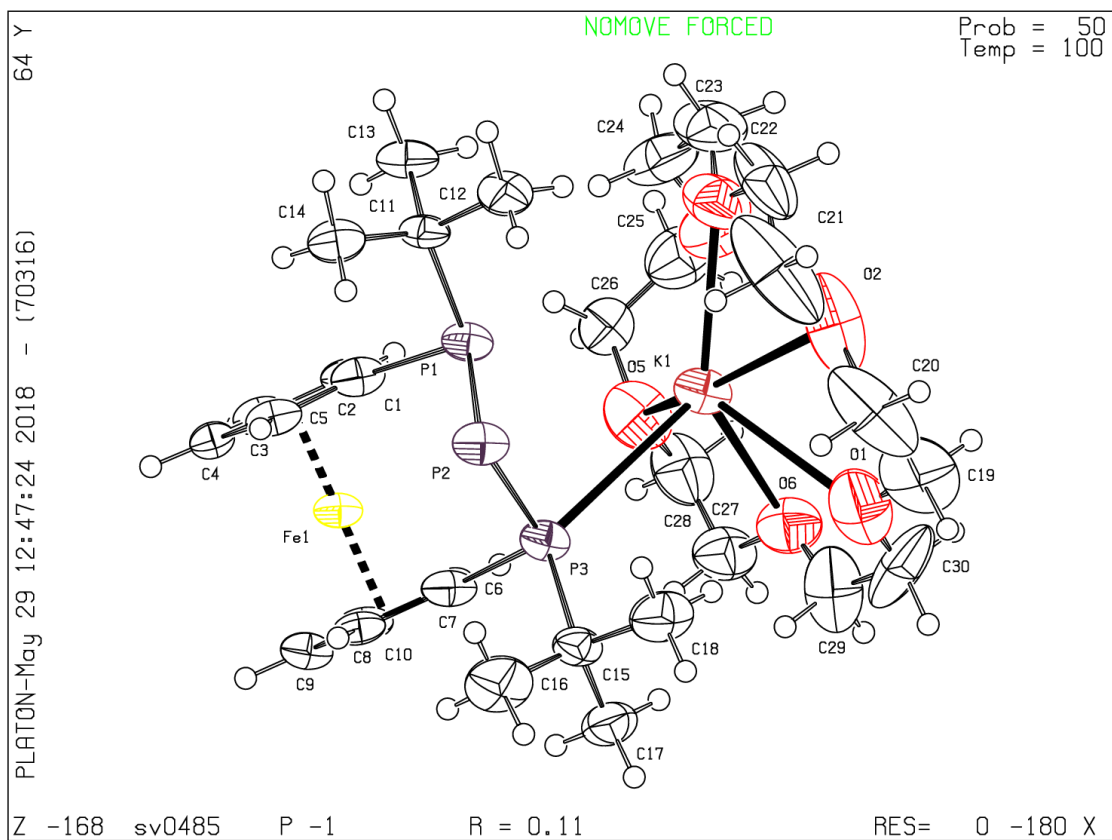

Supplement: s1 [file s1]
