# Supplementary material
Source: MDPI journal article supplement (https://www.mdpi.com/2304-6740/6/3/67)
Supplement: s1 [file s1]

Archive with 6 entries (6 files):
- checkcif_i2732.pdf
- checkcif_sv0468.pdf
- checkcif_sv0485.pdf
- i2732.cif
- sv0468.cif
- sv0485.cif
