# Supplementary material
Source: MDPI journal article supplement (https://www.mdpi.com/2304-6740/6/3/67)
Supplement: s1 [file s1 › i2732.cif]

data_i2732
 
_audit_creation_method            'SHELXL-2017/1'
_shelx_SHELXL_version_number      '2017/1'
_chemical_name_systematic         ?
_chemical_name_common             ?
_chemical_melting_point           ?
_chemical_formula_moiety          ?
_chemical_formula_sum             'C28 H46 Fe Na O5 P3' 
_chemical_formula_weight          634.40

loop_
 _atom_type_symbol
 _atom_type_description
 _atom_type_scat_dispersion_real
 _atom_type_scat_dispersion_imag
 _atom_type_scat_source
 'C'  'C'   0.0033   0.0016
 'International Tables Vol C Tables 4.2.6.8 and 6.1.1.4'
 'H'  'H'   0.0000   0.0000
 'International Tables Vol C Tables 4.2.6.8 and 6.1.1.4'
 'Fe'  'Fe'   0.3463   0.8444
 'International Tables Vol C Tables 4.2.6.8 and 6.1.1.4'
 'Na'  'Na'   0.0362   0.0249
 'International Tables Vol C Tables 4.2.6.8 and 6.1.1.4'
 'O'  'O'   0.0106   0.0060
 'International Tables Vol C Tables 4.2.6.8 and 6.1.1.4'
 'P'  'P'   0.1023   0.0942
 'International Tables Vol C Tables 4.2.6.8 and 6.1.1.4'
 
_space_group_crystal_system       monoclinic
_space_group_IT_number            14
_space_group_name_H-M_alt         'P 21/c'
_space_group_name_Hall            '-P 2ybc'
 
_shelx_space_group_comment
;
The symmetry employed for this shelxl refinement is uniquely defined
by the following loop, which should always be used as a source of
symmetry information in preference to the above space-group names.
They are only intended as comments.
;
 
loop_
 _space_group_symop_operation_xyz
 'x, y, z'
 '-x, y+1/2, -z+1/2'
 '-x, -y, -z'
 'x, -y-1/2, z-1/2'
 
_cell_length_a                    14.2758(6)
_cell_length_b                    10.3266(3)
_cell_length_c                    21.4828(9)
_cell_angle_alpha                 90
_cell_angle_beta                  99.536(3)
_cell_angle_gamma                 90
_cell_volume                      3123.2(2)
_cell_formula_units_Z             4
_cell_measurement_temperature     100(2)
_cell_measurement_reflns_used    37739
_cell_measurement_theta_min      1.45
_cell_measurement_theta_max      26.33
 
_exptl_crystal_description       'block'
_exptl_crystal_colour            'orange'
_exptl_crystal_density_meas       ?
_exptl_crystal_density_method     ?
_exptl_crystal_density_diffrn     1.349          
_exptl_crystal_F_000              1344
_exptl_transmission_factor_min    ?
_exptl_transmission_factor_max    ?
_exptl_crystal_size_max           0.260
_exptl_crystal_size_mid           0.170
_exptl_crystal_size_min           0.100
_exptl_absorpt_coefficient_mu     0.685
_shelx_estimated_absorpt_T_min    0.842
_shelx_estimated_absorpt_T_max    0.935
_exptl_absorpt_correction_type   integration
_exptl_absorpt_process_details
;
STOE X-Red32, absorption correction by Gaussian integration, analogous to
P. Coppens, "The Evaluation of Absorption and Extinction in Single-Crystal
Structure Analysis", published in
F. R. Ahmed (Editor), "Crystallographic Computing",
Munksgaard, Copenhagen (1970), 255 - 270
;
_exptl_absorpt_correction_T_min  0.8673
_exptl_absorpt_correction_T_max  0.9466
_exptl_absorpt_special_details    ?
_diffrn_ambient_temperature       100(2)
_diffrn_measurement_device         '2-circle diffractometer'
_diffrn_measurement_device_type    'STOE IPDS II'

_diffrn_detector                   'image plate (34 cm diameter)'
_diffrn_detector_type              'STOE Imaging Plate'
_diffrn_detector_area_resol_mean 6.67

_diffrn_source                   'Genix Mo HF'
_diffrn_source_type              ?
_diffrn_radiation_probe          x-ray
_diffrn_source_target            ?
_diffrn_source_voltage           50
_diffrn_source_current           1.000
_diffrn_source_power             0.050
_diffrn_radiation_type           'Mo K\a'
_diffrn_radiation_wavelength     0.71073
_diffrn_radiation_monochromator  'plane graphite'
_diffrn_radiation_polarisn_norm  270
_diffrn_radiation_collimation    '1.2, 0.6 mm diameter, multiple pinhole'

_diffrn_measurement_method       'rotation method, \w scans'
_diffrn_measurement_details
; 205 frames, detector distance = 120 mm
;

_diffrn_reflns_number             18213
_diffrn_reflns_av_unetI/netI      0.0427
_diffrn_reflns_av_R_equivalents   0.0654
_diffrn_reflns_limit_h_min        -17
_diffrn_reflns_limit_h_max        17
_diffrn_reflns_limit_k_min        -12
_diffrn_reflns_limit_k_max        12
_diffrn_reflns_limit_l_min        -25
_diffrn_reflns_limit_l_max        26
_diffrn_reflns_theta_min          1.446
_diffrn_reflns_theta_max          25.498
_diffrn_reflns_theta_full         25.242
_diffrn_measured_fraction_theta_max   0.998
_diffrn_measured_fraction_theta_full  0.998
_diffrn_reflns_Laue_measured_fraction_max    0.998
_diffrn_reflns_Laue_measured_fraction_full   0.998
_diffrn_reflns_point_group_measured_fraction_max   0.998
_diffrn_reflns_point_group_measured_fraction_full  0.998
_reflns_number_total              5814
_reflns_number_gt                 5411
_reflns_threshold_expression      'I > 2\s(I)'
_reflns_Friedel_coverage          0.000
_reflns_Friedel_fraction_max      .
_reflns_Friedel_fraction_full     .
 
_reflns_special_details
;
 Reflections were merged by SHELXL according to the crystal
 class for the calculation of statistics and refinement.
 
 _reflns_Friedel_fraction is defined as the number of unique
 Friedel pairs measured divided by the number that would be
 possible theoretically, ignoring centric projections and
 systematic absences.
;
 
_computing_data_collection        ?
_computing_cell_refinement        ?
_computing_data_reduction         ?
_computing_structure_solution     ?
_computing_structure_refinement 'SHELXL-2017/1 (Sheldrick, 2017)'
_computing_molecular_graphics     ?
_computing_publication_material   ?
_refine_special_details           ?
_refine_ls_structure_factor_coef  Fsqd
_refine_ls_matrix_type            full
_refine_ls_weighting_scheme       calc
_refine_ls_weighting_details
'w=1/[\s^2^(Fo^2^)+(0.1109P)^2^+1.6455P] where P=(Fo^2^+2Fc^2^)/3'
_atom_sites_solution_primary      ?
_atom_sites_solution_secondary    ?
_atom_sites_solution_hydrogens    geom
_refine_ls_hydrogen_treatment     constr
_refine_ls_extinction_method      none
_refine_ls_extinction_coef        .
_refine_ls_number_reflns          5814
_refine_ls_number_parameters      349
_refine_ls_number_restraints      0
_refine_ls_R_factor_all           0.0554
_refine_ls_R_factor_gt            0.0531
_refine_ls_wR_factor_ref          0.1559
_refine_ls_wR_factor_gt           0.1517
_refine_ls_goodness_of_fit_ref    1.047
_refine_ls_restrained_S_all       1.047
_refine_ls_shift/su_max           0.001
_refine_ls_shift/su_mean          0.000
 
loop_
 _atom_site_label
 _atom_site_type_symbol
 _atom_site_fract_x
 _atom_site_fract_y
 _atom_site_fract_z
 _atom_site_U_iso_or_equiv
 _atom_site_adp_type
 _atom_site_occupancy
 _atom_site_site_symmetry_order  
 _atom_site_calc_flag
 _atom_site_refinement_flags_posn
 _atom_site_refinement_flags_adp
 _atom_site_refinement_flags_occupancy
 _atom_site_disorder_assembly
 _atom_site_disorder_group
C1 C 0.55125(17) 0.7639(2) 0.64431(12) 0.0237(5) Uani 1 1 d . . . . .
C2 C 0.50830(16) 0.6406(2) 0.62682(11) 0.0260(5) Uani 1 1 d . . . . .
H2A H 0.536438 0.558557 0.637748 0.031 Uiso 1 1 calc R U . . .
C3 C 0.41633(17) 0.6613(3) 0.59029(11) 0.0282(5) Uani 1 1 d . . . . .
H3A H 0.372760 0.595970 0.573036 0.034 Uiso 1 1 calc R U . . .
C4 C 0.40188(17) 0.7973(3) 0.58446(11) 0.0281(5) Uani 1 1 d . . . . .
H4A H 0.346727 0.839037 0.562658 0.034 Uiso 1 1 calc R U . . .
C5 C 0.48466(17) 0.8602(2) 0.61705(11) 0.0271(5) Uani 1 1 d . . . . .
H5A H 0.494088 0.951221 0.620165 0.032 Uiso 1 1 calc R U . . .
C6 C 0.64818(18) 0.7643(2) 0.51787(12) 0.0245(5) Uani 1 1 d . . . . .
C7 C 0.58426(17) 0.8657(2) 0.49278(11) 0.0248(5) Uani 1 1 d . . . . .
H7A H 0.594806 0.955805 0.499428 0.030 Uiso 1 1 calc R U . . .
C8 C 0.50216(17) 0.8085(3) 0.45615(11) 0.0258(5) Uani 1 1 d . . . . .
H8A H 0.449057 0.853971 0.433970 0.031 Uiso 1 1 calc R U . . .
C9 C 0.51352(17) 0.6721(2) 0.45857(11) 0.0276(5) Uani 1 1 d . . . . .
H9A H 0.469206 0.610241 0.438542 0.033 Uiso 1 1 calc R U . . .
C10 C 0.60320(17) 0.6438(2) 0.49635(11) 0.0259(5) Uani 1 1 d . . . . .
H10A H 0.628855 0.559844 0.505723 0.031 Uiso 1 1 calc R U . . .
C11 C 0.64672(16) 0.8621(2) 0.76180(11) 0.0261(5) Uani 1 1 d . . . . .
C12 C 0.74237(17) 0.8916(3) 0.80269(12) 0.0321(5) Uani 1 1 d . . . . .
H12A H 0.780666 0.812408 0.808460 0.039 Uiso 1 1 calc R U . . .
H12B H 0.732026 0.923812 0.843916 0.039 Uiso 1 1 calc R U . . .
H12C H 0.775819 0.957484 0.781926 0.039 Uiso 1 1 calc R U . . .
C13 C 0.5906(2) 0.7688(3) 0.79656(13) 0.0324(6) Uani 1 1 d . . . . .
H13A H 0.577639 0.809724 0.835420 0.039 Uiso 1 1 calc R U . . .
H13B H 0.627580 0.689593 0.807101 0.039 Uiso 1 1 calc R U . . .
H13C H 0.530384 0.747237 0.769488 0.039 Uiso 1 1 calc R U . . .
C14 C 0.59174(18) 0.9891(3) 0.74861(12) 0.0322(5) Uani 1 1 d . . . . .
H14C H 0.526298 0.970252 0.728755 0.039 Uiso 1 1 calc R U . . .
H14B H 0.622371 1.042935 0.720235 0.039 Uiso 1 1 calc R U . . .
H14A H 0.591332 1.035359 0.788388 0.039 Uiso 1 1 calc R U . . .
C15 C 0.83863(16) 0.8479(2) 0.51860(11) 0.0264(5) Uani 1 1 d . . . . .
C16 C 0.81022(19) 0.9852(3) 0.49781(13) 0.0354(6) Uani 1 1 d . . . . .
H16A H 0.746208 0.984580 0.472846 0.042 Uiso 1 1 calc R U . . .
H16B H 0.855251 1.019400 0.472100 0.042 Uiso 1 1 calc R U . . .
H16C H 0.810918 1.040135 0.535086 0.042 Uiso 1 1 calc R U . . .
C17 C 0.83207(19) 0.7621(3) 0.46012(13) 0.0318(6) Uani 1 1 d . . . . .
H17A H 0.879392 0.790124 0.434702 0.038 Uiso 1 1 calc R U . . .
H17B H 0.768385 0.769337 0.435024 0.038 Uiso 1 1 calc R U . . .
H17C H 0.844229 0.671887 0.473116 0.038 Uiso 1 1 calc R U . . .
C18 C 0.94019(17) 0.8487(3) 0.55450(12) 0.0332(6) Uani 1 1 d . . . . .
H18A H 0.943662 0.903600 0.592016 0.040 Uiso 1 1 calc R U . . .
H18B H 0.982959 0.882762 0.527163 0.040 Uiso 1 1 calc R U . . .
H18C H 0.959190 0.760192 0.567386 0.040 Uiso 1 1 calc R U . . .
C19 C 0.96065(17) 0.4632(3) 0.57513(13) 0.0332(6) Uani 1 1 d . . . . .
H19A H 0.933622 0.539199 0.550385 0.040 Uiso 1 1 calc R U . . .
H19B H 0.989023 0.404596 0.546862 0.040 Uiso 1 1 calc R U . . .
C20 C 1.03440(17) 0.5054(3) 0.62907(13) 0.0344(6) Uani 1 1 d . . . . .
H20A H 1.060876 0.429288 0.653980 0.041 Uiso 1 1 calc R U . . .
H20B H 1.086896 0.550315 0.613078 0.041 Uiso 1 1 calc R U . . .
C21 C 1.05082(19) 0.6285(3) 0.72363(13) 0.0393(6) Uani 1 1 d . . . . .
H21A H 1.105521 0.678545 0.713529 0.047 Uiso 1 1 calc R U . . .
H21B H 1.075247 0.551387 0.748536 0.047 Uiso 1 1 calc R U . . .
C22 C 0.9927(2) 0.7102(3) 0.76011(15) 0.0420(7) Uani 1 1 d . . . . .
H22A H 1.031229 0.732741 0.801340 0.050 Uiso 1 1 calc R U . . .
H22B H 0.975552 0.791788 0.736797 0.050 Uiso 1 1 calc R U . . .
C23 C 0.9207(2) 0.5473(3) 0.81673(13) 0.0369(6) Uani 1 1 d . . . . .
H23A H 0.945469 0.584220 0.858760 0.044 Uiso 1 1 calc R U . . .
H23B H 0.966668 0.482390 0.806228 0.044 Uiso 1 1 calc R U . . .
C24 C 0.8254(2) 0.4853(3) 0.81701(12) 0.0392(6) Uani 1 1 d . . . . .
H24A H 0.829469 0.421834 0.851881 0.047 Uiso 1 1 calc R U . . .
H24B H 0.777839 0.551941 0.823009 0.047 Uiso 1 1 calc R U . . .
C25 C 0.70044(19) 0.3866(3) 0.74468(13) 0.0373(6) Uani 1 1 d . . . . .
H25A H 0.660114 0.464946 0.737926 0.045 Uiso 1 1 calc R U . . .
H25B H 0.682768 0.337305 0.780545 0.045 Uiso 1 1 calc R U . . .
C26 C 0.68654(19) 0.3049(3) 0.68652(13) 0.0343(6) Uani 1 1 d . . . . .
H26A H 0.725145 0.225067 0.693997 0.041 Uiso 1 1 calc R U . . .
H26B H 0.618935 0.279706 0.675300 0.041 Uiso 1 1 calc R U . . .
C27 C 0.73921(18) 0.2974(3) 0.58731(13) 0.0333(6) Uani 1 1 d . . . . .
H27A H 0.681493 0.275952 0.556739 0.040 Uiso 1 1 calc R U . . .
H27B H 0.768027 0.215585 0.605326 0.040 Uiso 1 1 calc R U . . .
C28 C 0.80790(17) 0.3686(3) 0.55494(12) 0.0311(5) Uani 1 1 d . . . . .
H28A H 0.826650 0.314571 0.520975 0.037 Uiso 1 1 calc R U . . .
H28B H 0.778824 0.449459 0.535945 0.037 Uiso 1 1 calc R U . . .
Fe1 Fe 0.51986(2) 0.74521(3) 0.54790(2) 0.02235(15) Uani 1 1 d . . . . .
Na1 Na 0.81818(6) 0.56749(9) 0.67033(4) 0.0283(2) Uani 1 1 d . . . . .
O1 O 0.88867(11) 0.39760(17) 0.60115(8) 0.0295(4) Uani 1 1 d . . . . .
O2 O 0.99049(12) 0.59040(18) 0.66734(9) 0.0338(4) Uani 1 1 d . . . . .
O3 O 0.90732(13) 0.64607(18) 0.77068(9) 0.0363(4) Uani 1 1 d . . . . .
O4 O 0.79846(13) 0.42209(18) 0.75783(8) 0.0329(4) Uani 1 1 d . . . . .
O5 O 0.71476(12) 0.37740(17) 0.63645(8) 0.0301(4) Uani 1 1 d . . . . .
P1 P 0.67179(4) 0.77830(6) 0.68828(3) 0.02287(17) Uani 1 1 d . . . . .
P2 P 0.74273(4) 0.92456(6) 0.63946(3) 0.02533(18) Uani 1 1 d . . . . .
P3 P 0.76098(4) 0.77351(6) 0.57207(3) 0.02306(17) Uani 1 1 d . . . . .
 
loop_
 _atom_site_aniso_label
 _atom_site_aniso_U_11
 _atom_site_aniso_U_22
 _atom_site_aniso_U_33
 _atom_site_aniso_U_23
 _atom_site_aniso_U_13
 _atom_site_aniso_U_12
C1 0.0277(12) 0.0249(12) 0.0195(12) 0.0020(9) 0.0064(9) -0.0013(9)
C2 0.0283(11) 0.0280(12) 0.0222(11) 0.0007(9) 0.0058(9) -0.0020(9)
C3 0.0264(11) 0.0339(13) 0.0247(12) -0.0009(10) 0.0059(9) -0.0064(9)
C4 0.0265(11) 0.0344(13) 0.0231(12) -0.0006(11) 0.0033(9) -0.0006(10)
C5 0.0322(12) 0.0287(12) 0.0209(11) 0.0009(10) 0.0062(9) 0.0004(10)
C6 0.0273(12) 0.0265(12) 0.0210(12) 0.0001(9) 0.0077(9) -0.0002(9)
C7 0.0320(12) 0.0248(12) 0.0185(11) 0.0024(9) 0.0067(9) -0.0013(9)
C8 0.0284(11) 0.0300(13) 0.0188(11) 0.0016(10) 0.0038(9) -0.0021(10)
C9 0.0312(12) 0.0299(13) 0.0218(11) -0.0021(10) 0.0049(9) -0.0040(10)
C10 0.0315(12) 0.0261(12) 0.0213(11) -0.0016(9) 0.0076(9) -0.0019(9)
C11 0.0284(11) 0.0286(12) 0.0216(11) -0.0014(9) 0.0049(9) -0.0005(9)
C12 0.0332(12) 0.0381(14) 0.0248(12) -0.0041(11) 0.0040(9) -0.0025(10)
C13 0.0372(14) 0.0376(14) 0.0241(13) -0.0013(10) 0.0101(10) -0.0035(10)
C14 0.0371(13) 0.0331(13) 0.0276(12) -0.0043(11) 0.0084(10) 0.0026(10)
C15 0.0281(11) 0.0275(12) 0.0251(11) 0.0006(10) 0.0086(9) 0.0002(9)
C16 0.0410(13) 0.0301(13) 0.0388(14) 0.0065(11) 0.0180(11) 0.0028(11)
C17 0.0343(14) 0.0378(14) 0.0251(14) 0.0013(10) 0.0102(11) 0.0001(10)
C18 0.0310(12) 0.0378(14) 0.0314(13) 0.0014(11) 0.0067(10) -0.0064(10)
C19 0.0301(12) 0.0366(14) 0.0346(13) 0.0049(11) 0.0103(10) 0.0013(10)
C20 0.0287(12) 0.0385(14) 0.0368(14) 0.0008(12) 0.0074(10) 0.0016(10)
C21 0.0333(13) 0.0418(15) 0.0402(15) -0.0055(13) -0.0016(11) -0.0041(11)
C22 0.0392(15) 0.0368(14) 0.0471(17) -0.0102(13) -0.0014(12) -0.0030(12)
C23 0.0441(14) 0.0392(15) 0.0259(13) -0.0045(11) 0.0009(10) 0.0109(11)
C24 0.0527(16) 0.0426(15) 0.0234(12) -0.0023(11) 0.0093(11) 0.0095(12)
C25 0.0417(14) 0.0382(14) 0.0352(14) 0.0055(12) 0.0158(11) 0.0009(12)
C26 0.0364(13) 0.0311(13) 0.0376(14) 0.0032(12) 0.0127(11) -0.0020(11)
C27 0.0351(13) 0.0310(13) 0.0341(14) -0.0058(11) 0.0072(11) -0.0029(11)
C28 0.0315(12) 0.0339(13) 0.0271(12) -0.0056(10) 0.0023(9) 0.0002(10)
Fe1 0.0256(2) 0.0230(2) 0.0186(2) 0.00053(12) 0.00404(16) -0.00168(12)
Na1 0.0307(5) 0.0280(5) 0.0259(5) 0.0007(4) 0.0042(4) 0.0013(4)
O1 0.0264(8) 0.0348(9) 0.0273(9) 0.0034(7) 0.0045(6) -0.0005(7)
O2 0.0313(9) 0.0350(10) 0.0340(10) -0.0017(8) 0.0021(7) 0.0020(7)
O3 0.0360(9) 0.0366(10) 0.0346(10) -0.0022(8) 0.0006(7) 0.0049(8)
O4 0.0395(9) 0.0350(10) 0.0248(9) -0.0005(7) 0.0074(7) 0.0020(8)
O5 0.0327(9) 0.0264(9) 0.0325(9) -0.0014(7) 0.0093(7) -0.0019(7)
P1 0.0257(3) 0.0232(3) 0.0200(3) -0.0001(2) 0.0045(2) 0.0004(2)
P2 0.0298(3) 0.0234(3) 0.0238(3) -0.0021(2) 0.0075(2) -0.0030(2)
P3 0.0257(3) 0.0228(3) 0.0212(3) 0.0007(2) 0.0052(2) 0.0003(2)
 
_geom_special_details
;
 All esds (except the esd in the dihedral angle between two l.s. planes)
 are estimated using the full covariance matrix.  The cell esds are taken
 into account individually in the estimation of esds in distances, angles
 and torsion angles; correlations between esds in cell parameters are only
 used when they are defined by crystal symmetry.  An approximate (isotropic)
 treatment of cell esds is used for estimating esds involving l.s. planes.
;
 
loop_
 _geom_bond_atom_site_label_1
 _geom_bond_atom_site_label_2
 _geom_bond_distance
 _geom_bond_site_symmetry_2
 _geom_bond_publ_flag
C1 C5 1.432(3) . ?
C1 C2 1.437(3) . ?
C1 P1 1.827(3) . ?
C1 Fe1 2.054(3) . ?
C2 C3 1.430(3) . ?
C2 Fe1 2.040(2) . ?
C2 H2A 0.9500 . ?
C3 C4 1.423(4) . ?
C3 Fe1 2.052(2) . ?
C3 H3A 0.9500 . ?
C4 C5 1.426(3) . ?
C4 Fe1 2.045(2) . ?
C4 H4A 0.9500 . ?
C5 Fe1 2.029(2) . ?
C5 H5A 0.9500 . ?
C6 C7 1.434(3) . ?
C6 C10 1.441(3) . ?
C6 P3 1.827(3) . ?
C6 Fe1 2.050(2) . ?
C7 C8 1.427(3) . ?
C7 Fe1 2.038(2) . ?
C7 H7A 0.9500 . ?
C8 C9 1.418(4) . ?
C8 Fe1 2.052(2) . ?
C8 H8A 0.9500 . ?
C9 C10 1.428(3) . ?
C9 Fe1 2.050(2) . ?
C9 H9A 0.9500 . ?
C10 Fe1 2.043(2) . ?
C10 H10A 0.9500 . ?
C11 C13 1.525(3) . ?
C11 C12 1.527(3) . ?
C11 C14 1.530(3) . ?
C11 P1 1.886(2) . ?
C12 H12A 0.9800 . ?
C12 H12B 0.9800 . ?
C12 H12C 0.9800 . ?
C13 H13A 0.9800 . ?
C13 H13B 0.9800 . ?
C13 H13C 0.9800 . ?
C14 H14C 0.9800 . ?
C14 H14B 0.9800 . ?
C14 H14A 0.9800 . ?
C15 C16 1.521(3) . ?
C15 C18 1.525(3) . ?
C15 C17 1.527(4) . ?
C15 P3 1.887(2) . ?
C16 H16A 0.9800 . ?
C16 H16B 0.9800 . ?
C16 H16C 0.9800 . ?
C17 H17A 0.9800 . ?
C17 H17B 0.9800 . ?
C17 H17C 0.9800 . ?
C18 H18A 0.9800 . ?
C18 H18B 0.9800 . ?
C18 H18C 0.9800 . ?
C19 O1 1.420(3) . ?
C19 C20 1.496(4) . ?
C19 H19A 0.9900 . ?
C19 H19B 0.9900 . ?
C20 O2 1.418(3) . ?
C20 H20A 0.9900 . ?
C20 H20B 0.9900 . ?
C21 O2 1.419(3) . ?
C21 C22 1.494(4) . ?
C21 H21A 0.9900 . ?
C21 H21B 0.9900 . ?
C22 O3 1.437(3) . ?
C22 H22A 0.9900 . ?
C22 H22B 0.9900 . ?
C23 O3 1.412(3) . ?
C23 C24 1.504(4) . ?
C23 H23A 0.9900 . ?
C23 H23B 0.9900 . ?
C24 O4 1.424(3) . ?
C24 H24A 0.9900 . ?
C24 H24B 0.9900 . ?
C25 O4 1.429(3) . ?
C25 C26 1.493(4) . ?
C25 Na1 3.124(3) . ?
C25 H25A 0.9900 . ?
C25 H25B 0.9900 . ?
C26 O5 1.422(3) . ?
C26 H26A 0.9900 . ?
C26 H26B 0.9900 . ?
C27 O5 1.429(3) . ?
C27 C28 1.487(4) . ?
C27 H27A 0.9900 . ?
C27 H27B 0.9900 . ?
C28 O1 1.423(3) . ?
C28 H28A 0.9900 . ?
C28 H28B 0.9900 . ?
Na1 O3 2.453(2) . ?
Na1 O4 2.458(2) . ?
Na1 O2 2.483(2) . ?
Na1 O5 2.491(2) . ?
Na1 O1 2.607(2) . ?
Na1 P3 3.0129(11) . ?
Na1 P1 3.0858(11) . ?
P1 P2 2.1814(9) . ?
P2 P3 2.1729(9) . ?
 
loop_
 _geom_angle_atom_site_label_1
 _geom_angle_atom_site_label_2
 _geom_angle_atom_site_label_3
 _geom_angle
 _geom_angle_site_symmetry_1
 _geom_angle_site_symmetry_3
 _geom_angle_publ_flag
C5 C1 C2 106.4(2) . . ?
C5 C1 P1 131.28(18) . . ?
C2 C1 P1 122.14(18) . . ?
C5 C1 Fe1 68.53(14) . . ?
C2 C1 Fe1 68.93(14) . . ?
P1 C1 Fe1 123.95(13) . . ?
C3 C2 C1 108.9(2) . . ?
C3 C2 Fe1 70.01(14) . . ?
C1 C2 Fe1 69.99(14) . . ?
C3 C2 H2A 125.5 . . ?
C1 C2 H2A 125.5 . . ?
Fe1 C2 H2A 126.0 . . ?
C4 C3 C2 107.6(2) . . ?
C4 C3 Fe1 69.41(13) . . ?
C2 C3 Fe1 69.10(13) . . ?
C4 C3 H3A 126.2 . . ?
C2 C3 H3A 126.2 . . ?
Fe1 C3 H3A 126.9 . . ?
C3 C4 C5 108.1(2) . . ?
C3 C4 Fe1 69.95(13) . . ?
C5 C4 Fe1 68.92(14) . . ?
C3 C4 H4A 126.0 . . ?
C5 C4 H4A 126.0 . . ?
Fe1 C4 H4A 126.7 . . ?
C4 C5 C1 108.9(2) . . ?
C4 C5 Fe1 70.10(14) . . ?
C1 C5 Fe1 70.41(14) . . ?
C4 C5 H5A 125.5 . . ?
C1 C5 H5A 125.5 . . ?
Fe1 C5 H5A 125.5 . . ?
C7 C6 C10 106.7(2) . . ?
C7 C6 P3 129.84(18) . . ?
C10 C6 P3 123.26(18) . . ?
C7 C6 Fe1 69.04(13) . . ?
C10 C6 Fe1 69.13(13) . . ?
P3 C6 Fe1 122.94(13) . . ?
C8 C7 C6 108.6(2) . . ?
C8 C7 Fe1 70.10(13) . . ?
C6 C7 Fe1 69.90(13) . . ?
C8 C7 H7A 125.7 . . ?
C6 C7 H7A 125.7 . . ?
Fe1 C7 H7A 125.9 . . ?
C9 C8 C7 108.2(2) . . ?
C9 C8 Fe1 69.71(12) . . ?
C7 C8 Fe1 69.07(13) . . ?
C9 C8 H8A 125.9 . . ?
C7 C8 H8A 125.9 . . ?
Fe1 C8 H8A 126.9 . . ?
C8 C9 C10 108.1(2) . . ?
C8 C9 Fe1 69.84(12) . . ?
C10 C9 Fe1 69.31(13) . . ?
C8 C9 H9A 126.0 . . ?
C10 C9 H9A 126.0 . . ?
Fe1 C9 H9A 126.5 . . ?
C9 C10 C6 108.4(2) . . ?
C9 C10 Fe1 69.87(14) . . ?
C6 C10 Fe1 69.65(14) . . ?
C9 C10 H10A 125.8 . . ?
C6 C10 H10A 125.8 . . ?
Fe1 C10 H10A 126.3 . . ?
C13 C11 C12 109.7(2) . . ?
C13 C11 C14 109.7(2) . . ?
C12 C11 C14 108.5(2) . . ?
C13 C11 P1 107.95(17) . . ?
C12 C11 P1 107.31(16) . . ?
C14 C11 P1 113.62(16) . . ?
C11 C12 H12A 109.5 . . ?
C11 C12 H12B 109.5 . . ?
H12A C12 H12B 109.5 . . ?
C11 C12 H12C 109.5 . . ?
H12A C12 H12C 109.5 . . ?
H12B C12 H12C 109.5 . . ?
C11 C13 H13A 109.5 . . ?
C11 C13 H13B 109.5 . . ?
H13A C13 H13B 109.5 . . ?
C11 C13 H13C 109.5 . . ?
H13A C13 H13C 109.5 . . ?
H13B C13 H13C 109.5 . . ?
C11 C14 H14C 109.5 . . ?
C11 C14 H14B 109.5 . . ?
H14C C14 H14B 109.5 . . ?
C11 C14 H14A 109.5 . . ?
H14C C14 H14A 109.5 . . ?
H14B C14 H14A 109.5 . . ?
C16 C15 C18 109.2(2) . . ?
C16 C15 C17 108.8(2) . . ?
C18 C15 C17 110.0(2) . . ?
C16 C15 P3 113.79(16) . . ?
C18 C15 P3 107.42(16) . . ?
C17 C15 P3 107.61(17) . . ?
C15 C16 H16A 109.5 . . ?
C15 C16 H16B 109.5 . . ?
H16A C16 H16B 109.5 . . ?
C15 C16 H16C 109.5 . . ?
H16A C16 H16C 109.5 . . ?
H16B C16 H16C 109.5 . . ?
C15 C17 H17A 109.5 . . ?
C15 C17 H17B 109.5 . . ?
H17A C17 H17B 109.5 . . ?
C15 C17 H17C 109.5 . . ?
H17A C17 H17C 109.5 . . ?
H17B C17 H17C 109.5 . . ?
C15 C18 H18A 109.5 . . ?
C15 C18 H18B 109.5 . . ?
H18A C18 H18B 109.5 . . ?
C15 C18 H18C 109.5 . . ?
H18A C18 H18C 109.5 . . ?
H18B C18 H18C 109.5 . . ?
O1 C19 C20 107.2(2) . . ?
O1 C19 H19A 110.3 . . ?
C20 C19 H19A 110.3 . . ?
O1 C19 H19B 110.3 . . ?
C20 C19 H19B 110.3 . . ?
H19A C19 H19B 108.5 . . ?
O2 C20 C19 107.9(2) . . ?
O2 C20 H20A 110.1 . . ?
C19 C20 H20A 110.1 . . ?
O2 C20 H20B 110.1 . . ?
C19 C20 H20B 110.1 . . ?
H20A C20 H20B 108.4 . . ?
O2 C21 C22 107.0(2) . . ?
O2 C21 H21A 110.3 . . ?
C22 C21 H21A 110.3 . . ?
O2 C21 H21B 110.3 . . ?
C22 C21 H21B 110.3 . . ?
H21A C21 H21B 108.6 . . ?
O3 C22 C21 112.5(2) . . ?
O3 C22 H22A 109.1 . . ?
C21 C22 H22A 109.1 . . ?
O3 C22 H22B 109.1 . . ?
C21 C22 H22B 109.1 . . ?
H22A C22 H22B 107.8 . . ?
O3 C23 C24 107.0(2) . . ?
O3 C23 H23A 110.3 . . ?
C24 C23 H23A 110.3 . . ?
O3 C23 H23B 110.3 . . ?
C24 C23 H23B 110.3 . . ?
H23A C23 H23B 108.6 . . ?
O4 C24 C23 107.6(2) . . ?
O4 C24 H24A 110.2 . . ?
C23 C24 H24A 110.2 . . ?
O4 C24 H24B 110.2 . . ?
C23 C24 H24B 110.2 . . ?
H24A C24 H24B 108.5 . . ?
O4 C25 C26 107.5(2) . . ?
O4 C25 Na1 49.84(11) . . ?
C26 C25 Na1 85.29(15) . . ?
O4 C25 H25A 110.2 . . ?
C26 C25 H25A 110.2 . . ?
Na1 C25 H25A 77.6 . . ?
O4 C25 H25B 110.2 . . ?
C26 C25 H25B 110.2 . . ?
Na1 C25 H25B 158.9 . . ?
H25A C25 H25B 108.5 . . ?
O5 C26 C25 108.7(2) . . ?
O5 C26 H26A 109.9 . . ?
C25 C26 H26A 109.9 . . ?
O5 C26 H26B 109.9 . . ?
C25 C26 H26B 109.9 . . ?
H26A C26 H26B 108.3 . . ?
O5 C27 C28 108.7(2) . . ?
O5 C27 H27A 110.0 . . ?
C28 C27 H27A 110.0 . . ?
O5 C27 H27B 110.0 . . ?
C28 C27 H27B 110.0 . . ?
H27A C27 H27B 108.3 . . ?
O1 C28 C27 107.4(2) . . ?
O1 C28 H28A 110.2 . . ?
C27 C28 H28A 110.2 . . ?
O1 C28 H28B 110.2 . . ?
C27 C28 H28B 110.2 . . ?
H28A C28 H28B 108.5 . . ?
C5 Fe1 C7 104.97(10) . . ?
C5 Fe1 C2 68.76(10) . . ?
C7 Fe1 C2 155.83(10) . . ?
C5 Fe1 C10 159.04(10) . . ?
C7 Fe1 C10 68.82(10) . . ?
C2 Fe1 C10 108.28(10) . . ?
C5 Fe1 C4 40.98(10) . . ?
C7 Fe1 C4 122.81(10) . . ?
C2 Fe1 C4 68.60(10) . . ?
C10 Fe1 C4 159.02(10) . . ?
C5 Fe1 C6 121.11(10) . . ?
C7 Fe1 C6 41.06(9) . . ?
C2 Fe1 C6 120.80(10) . . ?
C10 Fe1 C6 41.22(9) . . ?
C4 Fe1 C6 158.64(10) . . ?
C5 Fe1 C9 157.36(10) . . ?
C7 Fe1 C9 68.61(10) . . ?
C2 Fe1 C9 125.84(10) . . ?
C10 Fe1 C9 40.83(10) . . ?
C4 Fe1 C9 123.02(10) . . ?
C6 Fe1 C9 69.15(10) . . ?
C5 Fe1 C3 68.81(10) . . ?
C7 Fe1 C3 160.53(10) . . ?
C2 Fe1 C3 40.89(9) . . ?
C10 Fe1 C3 123.43(10) . . ?
C4 Fe1 C3 40.64(10) . . ?
C6 Fe1 C3 157.99(10) . . ?
C9 Fe1 C3 109.65(10) . . ?
C5 Fe1 C8 120.71(10) . . ?
C7 Fe1 C8 40.83(9) . . ?
C2 Fe1 C8 162.34(10) . . ?
C10 Fe1 C8 68.45(10) . . ?
C4 Fe1 C8 107.87(10) . . ?
C6 Fe1 C8 68.98(10) . . ?
C9 Fe1 C8 40.45(10) . . ?
C3 Fe1 C8 125.28(10) . . ?
C5 Fe1 C1 41.06(9) . . ?
C7 Fe1 C1 118.96(9) . . ?
C2 Fe1 C1 41.08(9) . . ?
C10 Fe1 C1 123.05(10) . . ?
C4 Fe1 C1 69.14(10) . . ?
C6 Fe1 C1 104.55(10) . . ?
C9 Fe1 C1 161.22(10) . . ?
C3 Fe1 C1 69.22(9) . . ?
C8 Fe1 C1 155.50(10) . . ?
O3 Na1 O4 68.81(7) . . ?
O3 Na1 O2 67.62(7) . . ?
O4 Na1 O2 108.52(7) . . ?
O3 Na1 O5 135.52(7) . . ?
O4 Na1 O5 66.72(6) . . ?
O2 Na1 O5 127.54(7) . . ?
O3 Na1 O1 122.05(7) . . ?
O4 Na1 O1 97.40(6) . . ?
O2 Na1 O1 64.64(6) . . ?
O5 Na1 O1 64.48(6) . . ?
O3 Na1 P3 115.03(6) . . ?
O4 Na1 P3 156.20(6) . . ?
O2 Na1 P3 93.97(5) . . ?
O5 Na1 P3 105.84(5) . . ?
O1 Na1 P3 99.28(5) . . ?
O3 Na1 P1 85.43(5) . . ?
O4 Na1 P1 99.77(5) . . ?
O2 Na1 P1 129.08(6) . . ?
O5 Na1 P1 102.21(5) . . ?
O1 Na1 P1 151.58(5) . . ?
P3 Na1 P1 58.59(2) . . ?
O3 Na1 C25 89.61(8) . . ?
O4 Na1 C25 26.38(7) . . ?
O2 Na1 C25 133.61(8) . . ?
O5 Na1 C25 48.32(7) . . ?
O1 Na1 C25 100.38(7) . . ?
P3 Na1 C25 132.40(6) . . ?
P1 Na1 C25 85.71(6) . . ?
C19 O1 C28 112.42(19) . . ?
C19 O1 Na1 106.04(14) . . ?
C28 O1 Na1 101.22(14) . . ?
C20 O2 C21 113.7(2) . . ?
C20 O2 Na1 119.42(15) . . ?
C21 O2 Na1 117.93(16) . . ?
C23 O3 C22 115.1(2) . . ?
C23 O3 Na1 111.53(15) . . ?
C22 O3 Na1 110.09(16) . . ?
C24 O4 C25 113.9(2) . . ?
C24 O4 Na1 110.75(16) . . ?
C25 O4 Na1 103.78(14) . . ?
C26 O5 C27 112.9(2) . . ?
C26 O5 Na1 114.97(15) . . ?
C27 O5 Na1 117.78(14) . . ?
C1 P1 C11 100.20(11) . . ?
C1 P1 P2 106.27(8) . . ?
C11 P1 P2 104.63(8) . . ?
C1 P1 Na1 118.52(8) . . ?
C11 P1 Na1 130.89(8) . . ?
P2 P1 Na1 92.89(3) . . ?
P3 P2 P1 86.55(3) . . ?
C6 P3 C15 100.24(11) . . ?
C6 P3 P2 105.76(8) . . ?
C15 P3 P2 105.12(8) . . ?
C6 P3 Na1 121.19(8) . . ?
C15 P3 Na1 126.56(8) . . ?
P2 P3 Na1 95.08(3) . . ?
 
_refine_diff_density_max    0.776
_refine_diff_density_min   -0.944
_refine_diff_density_rms    0.234

_shelx_res_file
;
TITL LISA-MARIE FRENZEL, -173DEGC, AP
    C:\Daten\Struktur\Pietschnig\Frenzel\i2732\i2732.res
    created by SHELXL-2017/1 at 12:56:16 on 29-May-2018
CELL  0.71073 14.27580 10.32660 21.48280 90.00000 99.53600 90.00000
ZERR 4  0.00060  0.00030  0.00090  0.00000  0.00300  0.00000
LATT 1
SYMM -X, Y+ 0.50000, -Z+ 0.50000
SFAC C H FE NA O P
UNIT 112 184 4 4 20 12
TEMP -173
L.S. 50
ACTA
BOND $H
OMIT  -6  51
SIZE    0.100   0.170   0.260
FMAP 2
PLAN 20
WGHT    0.110900    1.645500
FVAR       0.17681
C1    1    0.551249    0.763937    0.644307    11.00000    0.02767    0.02495 =
         0.01949    0.00198    0.00644   -0.00133
C2    1    0.508298    0.640568    0.626816    11.00000    0.02829    0.02802 =
         0.02218    0.00066    0.00577   -0.00205
AFIX  43
H2A   2    0.536438    0.558557    0.637748    11.00000   -1.20000
AFIX   0
C3    1    0.416335    0.661258    0.590290    11.00000    0.02645    0.03394 =
         0.02465   -0.00088    0.00588   -0.00639
AFIX  43
H3A   2    0.372760    0.595970    0.573036    11.00000   -1.20000
AFIX   0
C4    1    0.401884    0.797344    0.584456    11.00000    0.02649    0.03444 =
         0.02311   -0.00061    0.00327   -0.00056
AFIX  43
H4A   2    0.346727    0.839037    0.562658    11.00000   -1.20000
AFIX   0
C5    1    0.484657    0.860231    0.617046    11.00000    0.03219    0.02867 =
         0.02092    0.00093    0.00621    0.00036
AFIX  43
H5A   2    0.494088    0.951221    0.620165    11.00000   -1.20000
AFIX   0
C6    1    0.648181    0.764307    0.517866    11.00000    0.02726    0.02654 =
         0.02099    0.00015    0.00768   -0.00022
C7    1    0.584259    0.865661    0.492776    11.00000    0.03198    0.02480 =
         0.01854    0.00239    0.00673   -0.00126
AFIX  43
H7A   2    0.594806    0.955805    0.499428    11.00000   -1.20000
AFIX   0
C8    1    0.502158    0.808495    0.456147    11.00000    0.02842    0.03000 =
         0.01880    0.00164    0.00377   -0.00211
AFIX  43
H8A   2    0.449057    0.853971    0.433970    11.00000   -1.20000
AFIX   0
C9    1    0.513519    0.672054    0.458565    11.00000    0.03122    0.02986 =
         0.02182   -0.00206    0.00494   -0.00404
AFIX  43
H9A   2    0.469206    0.610241    0.438542    11.00000   -1.20000
AFIX   0
C10   1    0.603198    0.643833    0.496354    11.00000    0.03152    0.02609 =
         0.02133   -0.00157    0.00763   -0.00194
AFIX  43
H10A  2    0.628855    0.559844    0.505723    11.00000   -1.20000
AFIX   0
C11   1    0.646723    0.862106    0.761796    11.00000    0.02842    0.02857 =
         0.02160   -0.00144    0.00494   -0.00050
C12   1    0.742373    0.891593    0.802686    11.00000    0.03323    0.03806 =
         0.02481   -0.00412    0.00396   -0.00249
AFIX 137
H12A  2    0.780666    0.812408    0.808460    11.00000   -1.20000
H12B  2    0.732026    0.923812    0.843916    11.00000   -1.20000
H12C  2    0.775819    0.957484    0.781926    11.00000   -1.20000
AFIX   0
C13   1    0.590562    0.768828    0.796558    11.00000    0.03715    0.03759 =
         0.02407   -0.00130    0.01009   -0.00355
AFIX 137
H13A  2    0.577639    0.809724    0.835420    11.00000   -1.20000
H13B  2    0.627580    0.689593    0.807101    11.00000   -1.20000
H13C  2    0.530384    0.747237    0.769488    11.00000   -1.20000
AFIX   0
C14   1    0.591738    0.989079    0.748608    11.00000    0.03707    0.03306 =
         0.02763   -0.00433    0.00838    0.00262
AFIX 137
H14C  2    0.526298    0.970252    0.728755    11.00000   -1.20000
H14B  2    0.622371    1.042935    0.720235    11.00000   -1.20000
H14A  2    0.591332    1.035359    0.788388    11.00000   -1.20000
AFIX   0
C15   1    0.838625    0.847893    0.518597    11.00000    0.02814    0.02746 =
         0.02508    0.00063    0.00856    0.00022
C16   1    0.810224    0.985221    0.497807    11.00000    0.04104    0.03007 =
         0.03883    0.00651    0.01797    0.00284
AFIX 137
H16A  2    0.746208    0.984580    0.472846    11.00000   -1.20000
H16B  2    0.855251    1.019400    0.472100    11.00000   -1.20000
H16C  2    0.810918    1.040135    0.535086    11.00000   -1.20000
AFIX   0
C17   1    0.832071    0.762128    0.460122    11.00000    0.03430    0.03782 =
         0.02512    0.00132    0.01024    0.00008
AFIX 137
H17A  2    0.879392    0.790124    0.434702    11.00000   -1.20000
H17B  2    0.768385    0.769337    0.435024    11.00000   -1.20000
H17C  2    0.844229    0.671887    0.473116    11.00000   -1.20000
AFIX   0
C18   1    0.940186    0.848682    0.554499    11.00000    0.03102    0.03777 =
         0.03144    0.00138    0.00671   -0.00644
AFIX 137
H18A  2    0.943662    0.903600    0.592016    11.00000   -1.20000
H18B  2    0.982959    0.882762    0.527163    11.00000   -1.20000
H18C  2    0.959190    0.760192    0.567386    11.00000   -1.20000
AFIX   0
C19   1    0.960651    0.463161    0.575130    11.00000    0.03008    0.03660 =
         0.03455    0.00492    0.01025    0.00131
AFIX  23
H19A  2    0.933622    0.539199    0.550385    11.00000   -1.20000
H19B  2    0.989023    0.404596    0.546862    11.00000   -1.20000
AFIX   0
C20   1    1.034397    0.505403    0.629068    11.00000    0.02870    0.03847 =
         0.03682    0.00082    0.00742    0.00161
AFIX  23
H20A  2    1.060876    0.429288    0.653980    11.00000   -1.20000
H20B  2    1.086896    0.550315    0.613078    11.00000   -1.20000
AFIX   0
C21   1    1.050822    0.628495    0.723629    11.00000    0.03332    0.04179 =
         0.04017   -0.00550   -0.00158   -0.00414
AFIX  23
H21A  2    1.105521    0.678545    0.713529    11.00000   -1.20000
H21B  2    1.075247    0.551387    0.748536    11.00000   -1.20000
AFIX   0
C22   1    0.992670    0.710189    0.760113    11.00000    0.03921    0.03683 =
         0.04707   -0.01024   -0.00135   -0.00301
AFIX  23
H22A  2    1.031229    0.732741    0.801340    11.00000   -1.20000
H22B  2    0.975552    0.791788    0.736797    11.00000   -1.20000
AFIX   0
C23   1    0.920680    0.547288    0.816729    11.00000    0.04407    0.03920 =
         0.02590   -0.00446    0.00090    0.01091
AFIX  23
H23A  2    0.945469    0.584220    0.858760    11.00000   -1.20000
H23B  2    0.966668    0.482390    0.806228    11.00000   -1.20000
AFIX   0
C24   1    0.825410    0.485322    0.817007    11.00000    0.05270    0.04262 =
         0.02338   -0.00233    0.00934    0.00950
AFIX  23
H24A  2    0.829469    0.421834    0.851881    11.00000   -1.20000
H24B  2    0.777839    0.551941    0.823009    11.00000   -1.20000
AFIX   0
C25   1    0.700436    0.386551    0.744684    11.00000    0.04166    0.03820 =
         0.03515    0.00552    0.01577    0.00095
AFIX  23
H25A  2    0.660114    0.464946    0.737926    11.00000   -1.20000
H25B  2    0.682768    0.337305    0.780545    11.00000   -1.20000
AFIX   0
C26   1    0.686536    0.304911    0.686517    11.00000    0.03636    0.03113 =
         0.03764    0.00318    0.01269   -0.00198
AFIX  23
H26A  2    0.725145    0.225067    0.693997    11.00000   -1.20000
H26B  2    0.618935    0.279706    0.675300    11.00000   -1.20000
AFIX   0
C27   1    0.739213    0.297403    0.587312    11.00000    0.03513    0.03103 =
         0.03412   -0.00580    0.00717   -0.00295
AFIX  23
H27A  2    0.681493    0.275952    0.556739    11.00000   -1.20000
H27B  2    0.768027    0.215585    0.605326    11.00000   -1.20000
AFIX   0
C28   1    0.807898    0.368590    0.554944    11.00000    0.03149    0.03385 =
         0.02713   -0.00560    0.00231    0.00017
AFIX  23
H28A  2    0.826650    0.314571    0.520975    11.00000   -1.20000
H28B  2    0.778824    0.449459    0.535945    11.00000   -1.20000
AFIX   0
FE1   3    0.519865    0.745208    0.547899    11.00000    0.02556    0.02298 =
         0.01864    0.00053    0.00404   -0.00168
NA1   4    0.818184    0.567491    0.670333    11.00000    0.03067    0.02803 =
         0.02591    0.00074    0.00418    0.00128
O1    5    0.888671    0.397596    0.601148    11.00000    0.02639    0.03482 =
         0.02728    0.00340    0.00452   -0.00046
O2    5    0.990493    0.590402    0.667336    11.00000    0.03128    0.03501 =
         0.03397   -0.00166    0.00210    0.00198
O3    5    0.907321    0.646069    0.770678    11.00000    0.03600    0.03657 =
         0.03456   -0.00221    0.00061    0.00491
O4    5    0.798460    0.422091    0.757832    11.00000    0.03953    0.03501 =
         0.02481   -0.00051    0.00739    0.00202
O5    5    0.714764    0.377401    0.636450    11.00000    0.03271    0.02640 =
         0.03248   -0.00137    0.00934   -0.00194
P1    6    0.671793    0.778303    0.688282    11.00000    0.02566    0.02321 =
         0.02000   -0.00006    0.00452    0.00036
P2    6    0.742728    0.924560    0.639457    11.00000    0.02983    0.02343 =
         0.02376   -0.00211    0.00752   -0.00299
P3    6    0.760984    0.773508    0.572073    11.00000    0.02568    0.02279 =
         0.02116    0.00068    0.00521    0.00033
HKLF 4


REM  LISA-MARIE FRENZEL, -173DEGC, AP
REM R1 =  0.0531 for    5411 Fo > 4sig(Fo)  and  0.0554 for all    5814 data
REM    349 parameters refined using      0 restraints

END

WGHT      0.1110      1.6225

REM Highest difference peak  0.776,  deepest hole -0.944,  1-sigma level  0.234
Q1    1   0.7421  0.7859  0.6589  11.00000  0.05    0.78
Q2    1   0.5982  0.6608  0.5331  11.00000  0.05    0.77
Q3    1   0.5787  0.6488  0.5262  11.00000  0.05    0.77
Q4    1   0.8239  0.8675  0.6621  11.00000  0.05    0.71
Q5    1   0.7209  0.8783  0.8304  11.00000  0.05    0.69
Q6    1   0.5897  0.6773  0.5900  11.00000  0.05    0.68
Q7    1   0.8152  0.8564  0.6121  11.00000  0.05    0.65
Q8    1   1.0037  0.6231  0.7567  11.00000  0.05    0.65
Q9    1   0.8193  0.8367  0.5356  11.00000  0.05    0.64
Q10   1   0.7464  0.8829  0.5701  11.00000  0.05    0.62
Q11   1   0.8459  0.8424  0.5545  11.00000  0.05    0.62
Q12   1   0.7361  0.8394  0.7335  11.00000  0.05    0.61
Q13   1   0.7009  0.3773  0.7731  11.00000  0.05    0.61
Q14   1   0.7982  0.3731  0.6431  11.00000  0.05    0.61
Q15   1   1.0928  0.6392  0.5434  11.00000  0.05    0.61
Q16   1   0.3576  0.8836  0.4794  11.00000  0.05    0.61
Q17   1   0.6856  0.8628  0.7703  11.00000  0.05    0.59
Q18   1   0.7976  0.8980  0.7004  11.00000  0.05    0.59
Q19   1   0.8407  0.9065  0.5230  11.00000  0.05    0.58
Q20   1   0.5110  1.1069  0.8010  11.00000  0.05    0.58
;
_shelx_res_checksum   30296

_shelx_hkl_file
;
 -10   9  11    0.30    0.43   0
 -10  10   0    0.71    0.35   0
 -10  10   1   16.24    0.40   0
 -10  10   2   14.35    0.41   0
  -9   6  19    8.47    0.44   0
  -8   3 -20   15.20    0.43   0
  -8   6  17    0.06    0.38   0
  -8   9  -2    0.62    0.25   0
  -8   9   2    5.84    0.28   0
  -8   9   3   46.94    0.40   0
  -8   9   4   64.41    0.48   0
  -7   0  23   -0.35    0.39   0
  -7   3 -19    0.35    0.24   0
  -6  -1 -21    0.41    0.34   0
  -6   2 -19   -0.05    0.25   0
  -6   2  20   63.18    0.48   0
  -6   5  15    0.43    0.28   0
  -5  -8 -17    0.45    0.47   0
  -5  -7 -18    9.03    0.46   0
  -5  -6 -19   -0.06    0.47   0
  -5  -5  20   82.85    0.34   0
  -5  -3 -20   27.06    0.45   0
  -5  -1  20   14.64    0.27   0
  -5   4  15   11.63    0.30   0
  -5   6   9    4.84    0.20   0
  -5   7   2    5.30    0.18   0
  -5   7   3    9.87    0.21   0
  -4 -11  -8    7.39    0.45   0
  -4 -10 -11   15.83    0.50   0
  -4 -10  11    0.06    0.15   0
  -4  -9 -14    1.39    0.33   0
  -4  -8 -15   21.75    0.47   0
  -4  -5 -18    0.89    0.39   0
  -4  -5  18  210.35    0.40   0
  -4   1 -17    7.96    0.20   0
  -4   1  17   -0.04    0.23   0
  -4   3  14  170.01    0.48   0
  -4   4  12   44.70    0.32   0
  -4   5   9    4.74    0.17   0
  -3 -10  -8   49.18    0.52   0
  -3  -9  10   54.51    0.22   0
  -3  -8  12   42.15    0.13   0
  -3  -1  16   65.58    0.31   0
  -3   0 -16   46.13    0.29   0
  -3   2  13   16.81    0.24   0
  -3   3  11    2.55    0.18   0
  -3   4  -9   33.91    0.07   0
  -2  -5 -14   17.67    0.32   0
  -2  -1  13   18.37    0.17   0
  -2   1  11    5.54    0.16   0
  -2   3   7   11.32    0.18   0
  -2   4   1   11.04    0.12   0
  -1  -8  -4   23.46    0.24   0
  -1  -8   1   12.46    0.19   0
  -1  -7  -7    0.38    0.24   0
  -1  -4  10  371.50    0.23   0
  -1  -3 -12   50.09    0.26   0
  -1  -2  10  310.27    0.36   0
  -1  -1 -11    4.66    0.16   0
  -1   0 -10   24.23    0.17   0
   0  -5   2  426.54    0.45   0
   0  -4  -6    0.14    0.16   0
   0  -4   4   37.83    0.10   0
   0  -3  -7   31.87    0.21   0
   0   0  -2   26.36    0.06   0
 -10  10  -2    6.57    0.31   0
 -10  10   3    3.08    0.33   0
 -10  10   4    2.10    0.36   0
  -9   5  21    6.34    0.45   0
  -9   9  -7   17.98    0.24   0
  -9   9  10   40.47    0.49   0
  -8   4  21    0.16    0.35   0
  -8   5 -17    2.32    0.17   0
  -8   6  18   10.39    0.40   0
  -8   9  -3   24.44    0.29   0
  -7  -3  24    8.98    0.33   0
  -7  -2  24   83.40    0.53   0
  -7  -1  24    1.67    0.37   0
  -7   1  23    0.54    0.35   0
  -7   8   9    5.36    0.31   0
  -6  -5  22    6.61    0.24   0
  -6  -4 -21    0.11    0.32   0
  -6  -3 -21    0.66    0.41   0
  -6   0  22  163.79    0.64   0
  -6   1  21    0.10    0.30   0
  -6   7  10   47.38    0.40   0
  -5 -11  11    0.01    0.18   0
  -5  -9 -15    1.44    0.49   0
  -5   0  20    1.71    0.28   0
  -5   7  -4    8.67    0.15   0
  -4 -11  -7    0.52    0.36   0
  -4 -11   7   40.25    0.36   0
  -4 -10 -10    5.02    0.45   0
  -4  -9 -13   21.87    0.48   0
  -4  -9  13   10.50    0.13   0
  -4  -7 -16   58.48    0.56   0
  -4  -6 -17    0.21    0.38   0
  -4  -3 -18    8.71    0.31   0
  -4  -1 -18   13.23    0.30   0
  -4   0  18   14.92    0.27   0
  -4   2  16    0.56    0.24   0
  -4   3 -14   72.06    0.23   0
  -4   4  13    2.35    0.24   0
  -4   6   6    0.03    0.20   0
  -3 -10  -6    0.10    0.34   0
  -3 -10   6    0.98    0.20   0
  -3   3  12    2.44    0.19   0
  -2  -9   4   14.57    0.23   0
  -2  -8  -9    0.45    0.28   0
  -2  -7 -11    3.42    0.28   0
  -2  -6 -12   15.97    0.28   0
  -2  -5 -13   22.20    0.30   0
  -2  -2 -14    8.32    0.23   0
  -2   0 -13    1.18    0.14   0
  -2   1 -12   50.54    0.21   0
  -2   2  10  613.51    0.73   0
  -1  -6  -9   33.53    0.26   0
  -1  -4 -11  156.98    0.44   0
  -1   1   7    0.85    0.09   0
   0  -5  -3   42.49    0.23   0
   0  -5  -2  409.60    0.55   0
   0  -5   1  171.88    0.31   0
   0  -4  -5   44.12    0.24   0
 -10  10   7    5.65    0.46   0
  -9   6  20    0.34    0.47   0
  -9   8  15    0.80    0.46   0
  -9   9  11    0.52    0.42   0
  -8   3  23    1.30    0.45   0
  -8   9  -4   41.86    0.31   0
  -7   0 -21   -0.20    0.32   0
  -7   0  24   23.78    0.45   0
  -7   8  -7    0.25    0.13   0
  -6  -6 -19    0.30    0.45   0
  -6  -5 -20    7.29    0.49   0
  -6  -3  23    1.60    0.32   0
  -6   2  21    7.76    0.36   0
  -6   4  18   14.98    0.30   0
  -6   5 -14   35.22    0.15   0
  -6   8  -2    0.99    0.17   0
  -6   8   5    6.00    0.27   0
  -5 -10 -12    0.01    0.49   0
  -5  -9 -14   41.61    0.59   0
  -5  -8 -16   22.39    0.47   0
  -5  -7  19    0.08    0.12   0
  -5  -4 -19   -0.34    0.37   0
  -5  -4  21   15.55    0.26   0
  -5  -3 -19    6.10    0.35   0
  -5  -3  21   11.45    0.25   0
  -5   1 -18    0.07    0.22   0
  -5   2 -17    0.54    0.18   0
  -5   4  16    6.14    0.31   0
  -5   5 -12   32.61    0.11   0
  -5   6  11   -0.09    0.26   0
  -5   7   7   16.81    0.29   0
  -4 -11  -5    0.42    0.37   0
  -4 -11  -4    3.47    0.34   0
  -4 -11   6    1.12    0.23   0
  -4 -10  -9   48.65    0.56   0
  -4  -9 -12   10.50    0.44   0
  -4  -8 -14    0.95    0.38   0
  -4  -4  19   37.68    0.25   0
  -4  -3  19    1.66    0.18   0
  -4  -2  19   54.12    0.31   0
  -4   0 -17    2.30    0.21   0
  -4   3  15   15.82    0.23   0
  -4   6   7   66.71    0.36   0
  -3 -10  -5    2.23    0.34   0
  -3 -10   5   22.97    0.30   0
  -3  -8 -11   26.17    0.39   0
  -3  -5 -15    0.73    0.30   0
  -3  -5  16   39.90    0.18   0
  -3   0  16  353.21    0.63   0
  -3   2  14   33.09    0.28   0
  -3   4  10   22.21    0.24   0
  -3   5   6  215.68    0.48   0
  -2  -9  -3    1.68    0.26   0
  -2  -9   3    4.13    0.18   0
  -2  -8  -8    7.01    0.28   0
  -2  -7 -10   54.85    0.39   0
  -2  -7  10   -0.09    0.08   0
  -2  -3  14    0.38    0.12   0
  -2  -2  14   91.55    0.27   0
  -2   0  13    0.18    0.15   0
  -2   2 -10  295.40    0.34   0
  -2   3   8  665.05    0.74   0
  -2   4  -4    5.95    0.07   0
  -1  -6  -8  126.57    0.42   0
  -1  -4 -10   41.46    0.28   0
  -1  -1  10   12.75    0.13   0
  -1   0   9    0.17    0.11   0
   0  -5  -1  162.28    0.34   0
   0  -5   0    0.95    0.12   0
   0  -4  -4   35.87    0.21   0
   0  -3  -5   31.43    0.19   0
  -9   6 -16    0.21    0.14   0
  -9  10   2   27.86    0.38   0
  -9  10   3   22.99    0.39   0
  -8   6  19   83.98    0.65   0
  -8   9  -5    2.88    0.21   0
  -8   9   9    2.36    0.37   0
  -7  -3 -21    0.28    0.43   0
  -7  -2 -21    6.78    0.46   0
  -7  -1 -21    0.10    0.35   0
  -7   1 -20   36.01    0.41   0
  -7   2  23    1.19    0.39   0
  -7   4 -17   11.50    0.20   0
  -6  -7 -18    1.81    0.44   0
  -6  -6  22   38.65    0.29   0
  -6  -4 -20   53.05    0.58   0
  -6  -4  23   28.39    0.38   0
  -6  -3 -20    0.16    0.36   0
  -6  -2 -20  104.55    0.60   0
  -6  -1 -20   33.87    0.41   0
  -6   1 -19    3.49    0.25   0
  -6   1  22    2.31    0.34   0
  -6   2 -18    8.66    0.24   0
  -6   3  20  198.86    0.69   0
  -6   4  19    0.26    0.36   0
  -6   5  17    0.73    0.33   0
  -6   7  -9    0.12    0.07   0
  -6   8   7   -0.01    0.26   0
  -5 -12   1    1.54    0.36   0
  -5 -11  -8    2.10    0.45   0
  -5 -11  10   21.99    0.30   0
  -5 -10 -11    7.35    0.50   0
  -5  -9 -13    4.52    0.41   0
  -5  -8 -15    0.34    0.41   0
  -5  -6  20   21.44    0.21   0
  -5  -2 -19    8.22    0.26   0
  -5   0  21   -0.03    0.27   0
  -5   3  18  156.39    0.54   0
  -5   4 -14   16.39    0.14   0
  -5   5  15    1.18    0.26   0
  -4 -11  -3   -0.19    0.36   0
  -4 -11   4    3.59    0.30   0
  -4 -11   5   11.68    0.31   0
  -4 -10  -8   32.43    0.49   0
  -4  -9 -11   41.64    0.50   0
  -4  -8 -13    1.52    0.36   0
  -4  -4 -17   13.67    0.37   0
  -4  -1 -17    8.53    0.26   0
  -4   0  19    0.17    0.23   0
  -4   2 -15   25.14    0.19   0
  -4   2  17   98.20    0.45   0
  -4   3  16    4.13    0.27   0
  -4   4  14   -0.07    0.25   0
  -4   6   8    5.03    0.25   0
  -3 -10  -2    0.92    0.26   0
  -3 -10   3   14.77    0.30   0
  -3  -9  -8   49.62    0.47   0
  -3  -9   9   43.45    0.24   0
  -3  -7 -12   87.80    0.52   0
  -3  -4 -15   43.54    0.37   0
  -3  -3  17    9.21    0.16   0
  -3  -2  17   53.91    0.26   0
  -3   1 -14   70.94    0.26   0
  -3   3  13    3.42    0.21   0
  -3   4  11   73.94    0.34   0
  -3   5   7    2.55    0.20   0
  -2  -9   0   24.76    0.26   0
  -2  -9   1   11.77    0.22   0
  -2  -8  -6   -0.17    0.24   0
  -2  -6 -11    6.77    0.26   0
  -2  -5 -12   26.18    0.31   0
  -2  -4 -13  127.39    0.43   0
  -2  -1  14   89.74    0.29   0
  -2   2  11    2.40    0.17   0
  -2   3   9   12.34    0.19   0
  -2   4   5   90.54    0.30   0
  -1  -7  -4  116.89    0.39   0
  -1  -7   3    3.36    0.15   0
  -1  -6  -7    5.34    0.20   0
  -1  -3 -10    8.19    0.19   0
  -1   0  -9    1.00    0.11   0
  -1   1   8  114.77    0.27   0
  -1   2  -5  207.77    0.12   0
  -1   2   6  628.47    0.59   0
   0  -4  -3   18.14    0.17   0
   0  -4   3   17.37    0.10   0
   0  -1  -4  217.62    0.26   0
   0  -1   4  256.51    0.17   0
  -9   9  -8   24.94    0.25   0
  -9   9  13    0.13    0.47   0
  -9  10  -1   16.01    0.34   0
  -9  10   0   19.10    0.34   0
  -9  10   6   52.21    0.54   0
  -8   2 -20    1.57    0.32   0
  -8   3 -19    4.04    0.27   0
  -8   4 -18   10.38    0.22   0
  -8   8 -10    0.25    0.10   0
  -8   9  10   62.17    0.54   0
  -7  -1  25    2.30    0.36   0
  -7   1  24    0.60    0.38   0
  -7   2 -19    3.47    0.29   0
  -7   9  -1    0.81    0.23   0
  -7   9   0    2.05    0.23   0
  -7   9   1   27.69    0.31   0
  -7   9   2    3.70    0.25   0
  -6  -7 -17    0.19    0.45   0
  -6  -5 -19   -0.08    0.39   0
  -6   0 -19    2.42    0.31   0
  -6   0  23   -0.23    0.36   0
  -6   2  22  119.82    0.63   0
  -6   5  18   36.92    0.45   0
  -6   8   8   27.44    0.35   0
  -5 -11  -7   -0.18    0.36   0
  -5 -10 -10   38.21    0.58   0
  -5 -10  13    4.39    0.19   0
  -5  -8 -14    1.92    0.38   0
  -5  -6 -17    2.26    0.30   0
  -5  -5  21    9.51    0.21   0
  -5  -4 -18   88.80    0.55   0
  -5   0 -18   12.06    0.27   0
  -5   2  20   81.14    0.49   0
  -5   3  19   15.12    0.34   0
  -5   4  17   15.72    0.27   0
  -4 -11   1    5.47    0.29   0
  -4 -11   2   17.58    0.33   0
  -4 -11   3    0.60    0.26   0
  -4 -10  -7    2.51    0.37   0
  -4  -9 -10    4.62    0.39   0
  -4  -8 -12    2.37    0.31   0
  -4  -7 -14    7.65    0.36   0
  -4  -6 -15   20.88    0.40   0
  -4  -6  18   14.09    0.15   0
  -4  -3 -17    6.08    0.24   0
  -4  -2 -17    0.16    0.24   0
  -4   4  15   28.74    0.31   0
  -3 -10  -1   24.04    0.30   0
  -3 -10   0  103.73    0.50   0
  -3 -10   1    0.75    0.25   0
  -3  -4  17    2.64    0.15   0
  -3  -1 -15   26.44    0.26   0
  -3   0  17    4.35    0.26   0
  -3   1  16   59.84    0.34   0
  -3   2  15  155.33    0.50   0
  -3   3 -11    4.31    0.09   0
  -3   5  -6  138.95    0.17   0
  -2   0 -12  225.56    0.41   0
  -2   0  14  422.28    0.60   0
  -2   1 -11   74.79    0.23   0
  -2   1  13   17.20    0.21   0
  -1  -7  -2   75.16    0.31   0
  -1  -7  -1    0.60    0.15   0
  -1  -7   0   31.98    0.22   0
  -1  -7   2   14.40    0.16   0
  -1  -6  -6    5.90    0.19   0
  -1  -5  -8   14.72    0.18   0
  -1  -4  -9   99.27    0.33   0
  -1  -2  11    3.39    0.11   0
  -1   0  10  335.71    0.46   0
   0  -4  -2  178.49    0.34   0
   0  -4  -1   19.04    0.13   0
   0  -4   1   17.90    0.13   0
   0  -4   2  181.39    0.25   0
   0  -2   5   83.75    0.08   0
  -9  10  -3    0.11    0.26   0
  -9  10  -2    0.71    0.27   0
  -9  10   8    0.46    0.42   0
  -9  10   9    1.45    0.38   0
  -8   5  22    1.59    0.45   0
  -8   7  18   12.91    0.36   0
  -7  -4 -20   30.76    0.54   0
  -7   0 -20   -0.01    0.29   0
  -7   0  25   -0.16    0.40   0
  -7   2  24   82.11    0.63   0
  -7   3  23    7.34    0.45   0
  -7   8  -8   46.87    0.20   0
  -7   9  -2   67.97    0.35   0
  -7   9   6    0.48    0.27   0
  -6  -9 -14   30.64    0.54   0
  -6  -8 -15   14.87    0.47   0
  -6  -5  23    8.75    0.27   0
  -6  -4 -19    2.31    0.36   0
  -6  -3 -19    0.60    0.36   0
  -6  -2  24    0.55    0.30   0
  -6  -1 -19    3.41    0.31   0
  -6   1  23   11.09    0.40   0
  -6   4  20   71.88    0.55   0
  -5 -11  -5    0.37    0.37   0
  -5 -11   9    0.02    0.23   0
  -5 -10  -9    3.58    0.44   0
  -5  -9 -12    0.34    0.39   0
  -5  -7 -15   17.35    0.43   0
  -5  -6 -16    0.46    0.36   0
  -5  -3 -18   13.78    0.34   0
  -5  -3  22   48.95    0.34   0
  -5  -2 -18   72.31    0.45   0
  -5  -2  22   14.99    0.29   0
  -5  -1  22   18.97    0.32   0
  -5   1 -17    3.54    0.20   0
  -5   1  21   23.82    0.34   0
  -5   3 -15    4.60    0.16   0
  -5   4  18    5.61    0.35   0
  -5   5  16    9.91    0.33   0
  -4 -10   9   17.08    0.23   0
  -4  -9  -9   14.08    0.40   0
  -4  -7 -13  114.08    0.59   0
  -4  -7  17    7.61    0.09   0
  -4  -5  19   11.54    0.17   0
  -4  -4 -16    0.21    0.28   0
  -4  -3  20    3.13    0.23   0
  -4  -2  20   45.55    0.32   0
  -4  -1  20    0.22    0.21   0
  -4   0 -16  135.63    0.42   0
  -4   1  19    5.77    0.28   0
  -4   2  18   19.62    0.30   0
  -4   3  17    9.82    0.30   0
  -4   5  13   11.47    0.26   0
  -4   7   1    3.93    0.15   0
  -4   7   2   60.00    0.28   0
  -3  -9  -5    6.25    0.27   0
  -3  -9   8    0.63    0.16   0
  -3  -8  -9   35.32    0.39   0
  -3  -7 -11   89.70    0.48   0
  -3  -6 -12   59.37    0.39   0
  -3  -4 -14    1.19    0.25   0
  -3   0 -14    5.83    0.17   0
  -3   3  14   39.14    0.31   0
  -3   4  12  128.78    0.44   0
  -2  -8   6   10.43    0.16   0
  -2  -7  -7   26.96    0.29   0
  -2  -5 -11   56.40    0.31   0
  -2  -2 -12  257.89    0.52   0
  -2  -2  15   13.59    0.18   0
  -2  -1 -12   46.78    0.25   0
  -2   3  10   27.27    0.19   0
  -1  -6  -5    3.86    0.14   0
  -1  -5  -7    7.86    0.20   0
  -1  -4  -8   46.89    0.27   0
  -1  -3  -9   30.09    0.19   0
  -1  -3  11   94.36    0.18   0
  -1  -2  -9   12.02    0.18   0
  -1  -1  11   65.47    0.21   0
  -1   1  -7   25.70    0.10   0
  -1   1   9    0.98    0.13   0
  -1   3   0  127.09    0.21   0
  -1   3   1   28.85    0.13   0
  -1   3   2   27.53    0.14   0
   0  -4   0   65.90    0.19   0
   0  -3  -3   35.33    0.15   0
   0  -1  -3  150.67    0.20   0
   0   0   2   21.58    0.05   0
  -9  10  10    1.49    0.43   0
  -8   1 -20    9.11    0.34   0
  -8   6  21    0.10    0.48   0
  -8   7  19    2.79    0.45   0
  -8  10   2    3.08    0.29   0
  -8  10   3    6.06    0.27   0
  -8  10   4   45.07    0.41   0
  -8  10   5   17.04    0.40   0
  -7  -6 -18    5.66    0.45   0
  -7  -5 -19    4.99    0.47   0
  -7  -1 -20   28.08    0.45   0
  -7   1 -19    0.35    0.29   0
  -7   1  25    1.61    0.45   0
  -7   5 -15   14.52    0.16   0
  -7   6  19   11.60    0.34   0
  -7   7  17    7.36    0.42   0
  -7   9  -3    0.07    0.17   0
  -7   9   8   23.15    0.38   0
  -6 -11  -7    8.83    0.46   0
  -6 -10 -11    5.13    0.39   0
  -6  -9 -13   26.55    0.55   0
  -6  -7 -16   13.58    0.47   0
  -6  -6 -17    2.56    0.43   0
  -6  -5 -18   22.72    0.41   0
  -6  -3  24   12.71    0.32   0
  -6  -2 -19    0.18    0.30   0
  -6  -1  24   10.37    0.35   0
  -6   0  24   69.48    0.53   0
  -6   1 -18    2.39    0.23   0
  -6   2  23    6.32    0.36   0
  -6   5  19   10.63    0.41   0
  -6   8  11   16.09    0.35   0
  -5 -11  -4    5.36    0.38   0
  -5 -11  -3   12.69    0.40   0
  -5 -11   8    3.69    0.26   0
  -5 -10  -8    3.80    0.41   0
  -5  -9 -11    4.80    0.42   0
  -5  -8 -13   92.61    0.65   0
  -5  -4  22   20.26    0.30   0
  -5   0  22   80.61    0.48   0
  -5   2 -16   79.90    0.30   0
  -5   2  21    3.67    0.34   0
  -5   3  20    6.24    0.35   0
  -5   5  17    2.23    0.32   0
  -5   8   1   23.99    0.23   0
  -5   8   2    0.82    0.18   0
  -5   8   3   37.41    0.30   0
  -5   8   4    4.99    0.24   0
  -4  -9  -8    5.33    0.36   0
  -4  -8 -11   66.08    0.51   0
  -4  -5 -15    0.57    0.23   0
  -4  -3 -16   19.06    0.29   0
  -4  -1 -16   66.45    0.37   0
  -4   0  20   89.33    0.43   0
  -4   1 -15    7.58    0.16   0
  -4   3 -13    0.20    0.11   0
  -4   4  16    6.68    0.29   0
  -4   5  14   74.75    0.42   0
  -4   7  -1  116.18    0.32   0
  -4   7   0   23.93    0.20   0
  -4   7   4  220.76    0.54   0
  -4   7   5    8.13    0.23   0
  -3  -8  -8  100.50    0.51   0
  -3  -7 -10    1.01    0.27   0
  -3  -5 -13    0.88    0.18   0
  -3  -3  18   96.47    0.33   0
  -3  -2 -14   84.58    0.38   0
  -3  -2  18    1.35    0.16   0
  -3  -1 -14   66.85    0.32   0
  -3  -1  18   36.26    0.26   0
  -3   1  17   -0.07    0.22   0
  -3   2 -12  192.51    0.34   0
  -3   2  16  130.24    0.48   0
  -3   4  13   -0.10    0.22   0
  -3   6  -1  124.40    0.31   0
  -3   6   0   33.47    0.20   0
  -3   6   1    7.73    0.14   0
  -3   6   2    9.33    0.15   0
  -3   6   3   15.46    0.19   0
  -3   6   4   18.04    0.21   0
  -3   6   5    3.19    0.18   0
  -2  -8  -2    7.05    0.22   0
  -2  -8   5  149.95    0.36   0
  -2  -7  -6  111.53    0.44   0
  -2  -6  -9   25.99    0.25   0
  -2  -5 -10   21.01    0.26   0
  -2  -4 -11   60.18    0.33   0
  -2  -3  15    7.50    0.14   0
  -2  -1  15   74.65    0.28   0
  -2   1  14   79.93    0.32   0
  -2   3  11    3.38    0.19   0
  -2   4  -5  165.16    0.15   0
  -1  -6  -4   60.93    0.26   0
  -1  -5  -6  559.43    0.74   0
  -1  -3  -8  114.36    0.33   0
  -1   0  -8  210.40    0.31   0
  -1   0  11   -0.04    0.13   0
  -1   2   8  549.80    0.63   0
  -1   3  -1   65.89    0.15   0
  -1   3   3   14.57    0.14   0
  -1   3   4   17.43    0.15   0
   0  -3  -2   51.42    0.16   0
  -9   9  -9    7.38    0.18   0
  -9  10  -4    3.68    0.25   0
  -8   9  -7   16.75    0.20   0
  -8   9  14    0.59    0.45   0
  -8  10   0    0.41    0.24   0
  -8  10   1   27.00    0.34   0
  -8  10   7    1.13    0.38   0
  -8  10   8   21.44    0.47   0
  -7  -4 -19    4.80    0.43   0
  -7   3  24    8.34    0.46   0
  -7   4  23    1.68    0.47   0
  -7   6  20    1.17    0.43   0
  -7   7  18   13.44    0.44   0
  -7   9  -4   20.18    0.23   0
  -6 -11  -6    8.88    0.47   0
  -6  -9 -12   13.03    0.49   0
  -6  -4 -18   39.32    0.48   0
  -6  -4  24    4.31    0.30   0
  -6   0 -18  101.80    0.50   0
  -6   2 -17    0.07    0.24   0
  -6   4 -15    4.87    0.14   0
  -6   4  21    1.46    0.37   0
  -6   6  18    0.91    0.36   0
  -6   8  -6   11.11    0.16   0
  -5 -11  -2   18.15    0.43   0
  -5 -11  -1    5.03    0.38   0
  -5 -11   7    8.60    0.33   0
  -5  -9 -10    5.18    0.38   0
  -5  -8 -12    0.14    0.36   0
  -5  -7 -14    7.88    0.35   0
  -5  -6 -15    1.03    0.35   0
  -5  -5 -16    8.57    0.37   0
  -5  -1 -17    3.37    0.26   0
  -5   0 -17    0.03    0.20   0
  -5   1  22   20.10    0.37   0
  -5   4  19   61.86    0.49   0
  -5   8  -1   38.97    0.25   0
  -5   8   0   37.52    0.25   0
  -5   8   5    4.65    0.23   0
  -5   8   6   11.47    0.28   0
  -5   8   7    6.42    0.25   0
  -4 -10   8    4.05    0.19   0
  -4  -9  -7    0.22    0.30   0
  -4  -9  12   -0.08    0.13   0
  -4  -8 -10   24.94    0.38   0
  -4  -6 -13   21.18    0.35   0
  -4  -5 -14   60.48    0.42   0
  -4   1  20    0.33    0.27   0
  -4   2 -14   23.69    0.17   0
  -4   2  19   53.71    0.40   0
  -4   3  18   37.55    0.37   0
  -4   6  -7    0.06    0.06   0
  -4   6  12    1.13    0.26   0
  -4   7  -2  171.08    0.36   0
  -4   7   6  135.85    0.43   0
  -4   7   7    0.23    0.24   0
  -3  -9  -2   58.93    0.38   0
  -3  -9   7    2.37    0.17   0
  -3  -8  -7   13.80    0.31   0
  -3  -7  -9    0.36    0.26   0
  -3  -6 -11   24.50    0.31   0
  -3  -5 -12  206.05    0.59   0
  -3  -5  17    2.12    0.12   0
  -3  -4 -13    0.60    0.25   0
  -3   0  18   23.81    0.27   0
  -3   3  15    5.60    0.19   0
  -3   5  11   82.04    0.38   0
  -3   6   6   19.94    0.24   0
  -2  -8  -1   34.48    0.27   0
  -2  -8   0  105.88    0.39   0
  -2  -8   1  124.58    0.40   0
  -2  -8   2   24.57    0.23   0
  -2  -8   3    4.98    0.17   0
  -2  -8   4    7.92    0.17   0
  -2  -7  -5   82.87    0.38   0
  -2  -6  -8  170.45    0.51   0
  -2  -3 -11   27.93    0.25   0
  -2   0 -11    0.67    0.12   0
  -2   0  15    2.20    0.17   0
  -2   2  -9  266.36    0.30   0
  -2   2  13   38.57    0.23   0
  -2   4   9  104.04    0.36   0
  -2   5   1   29.14    0.17   0
  -2   5   2   76.72    0.26   0
  -2   5   3  105.47    0.31   0
  -1  -6  -2   53.89    0.26   0
  -1  -5  -5   66.19    0.29   0
  -1  -4  -7  319.60    0.54   0
  -1  -1  -8   92.69    0.26   0
  -1   1  10    9.74    0.12   0
   0  -3   0    0.52    0.07   0
   0  -3   3   33.44    0.09   0
   0  -2  -2  989.23    0.55   0
   0  -1  -2  683.95    0.36   0
   0  -1   5  104.80    0.14   0
   0   0   3    0.23    0.05   0
  -9   5 -17    0.18    0.17   0
  -9  10  -5    5.20    0.24   0
  -8  -3 -20   38.47    0.58   0
  -8  -2 -20    1.81    0.41   0
  -8   0 -20    4.18    0.32   0
  -8   2 -19    1.26    0.27   0
  -8   9  15    6.68    0.51   0
  -8  10  -2    0.49    0.26   0
  -8  10  -1    6.40    0.27   0
  -8  10   9    5.82    0.40   0
  -7  -8 -15    1.50    0.35   0
  -7  -7 -16    1.29    0.42   0
  -7  -6 -17    5.36    0.47   0
  -7  -5 -18   20.31    0.51   0
  -7  -3 -19    0.61    0.36   0
  -7  -2 -19    3.50    0.36   0
  -7  -1 -19    0.04    0.31   0
  -7   0 -19    0.66    0.28   0
  -7   2 -18   26.97    0.28   0
  -6 -10  -9    7.10    0.49   0
  -6  -9 -11    0.66    0.36   0
  -6  -8 -13    0.30    0.36   0
  -6  -6 -16    9.96    0.43   0
  -6  -5 -17    3.02    0.29   0
  -6  -3 -18    0.25    0.25   0
  -6  -2 -18    7.75    0.31   0
  -6  -2  25    6.49    0.38   0
  -6  -1 -18    2.20    0.26   0
  -6  -1  25    2.25    0.33   0
  -6   3 -16    0.32    0.17   0
  -6   3  23    1.67    0.40   0
  -6   4  22  189.39    0.83   0
  -6   7  16   30.39    0.44   0
  -6   9   0   12.22    0.27   0
  -6   9   1   16.53    0.26   0
  -6   9   2   10.53    0.25   0
  -6   9   3  132.19    0.49   0
  -6   9   5   36.88    0.35   0
  -6   9   6    5.58    0.29   0
  -5 -11   0   18.37    0.39   0
  -5 -11   2    2.45    0.30   0
  -5 -11   3    0.08    0.30   0
  -5 -11   4   38.43    0.44   0
  -5 -11   5   22.41    0.41   0
  -5 -11   6    1.70    0.27   0
  -5 -10  12   35.33    0.25   0
  -5  -9  -9    3.71    0.38   0
  -5  -7 -13    0.15    0.32   0
  -5  -6  21   10.79    0.18   0
  -5  -4 -16    8.33    0.33   0
  -5  -3  23   13.02    0.33   0
  -5  -2  23    3.10    0.26   0
  -5  -1  23   18.01    0.33   0
  -5   0  23    0.17    0.33   0
  -5   1 -16    3.62    0.19   0
  -5   2  22   16.23    0.39   0
  -5   3  21   13.47    0.38   0
  -5   4  20   74.25    0.53   0
  -5   7  -7  113.00    0.22   0
  -5   8  -2    6.98    0.18   0
  -4 -10  -2    0.28    0.25   0
  -4 -10  -1    9.83    0.29   0
  -4 -10   6   -0.03    0.21   0
  -4 -10   7   11.94    0.22   0
  -4  -9  -6   65.46    0.46   0
  -4  -8  -9    0.47    0.32   0
  -4  -7 -11   61.79    0.45   0
  -4  -3 -15   12.38    0.30   0
  -4  -3  21   14.52    0.25   0
  -4  -2 -15   25.50    0.28   0
  -4  -2  21    0.33    0.23   0
  -4  -1 -15    6.82    0.21   0
  -4  -1  21   14.46    0.27   0
  -4   0  21    1.50    0.27   0
  -4   4  17   21.18    0.28   0
  -4   5  15   16.54    0.25   0
  -4   7  -3   62.17    0.24   0
  -4   7   8   23.42    0.30   0
  -4   7   9    0.32    0.23   0
  -3  -9  -1    1.44    0.23   0
  -3  -9   0   83.66    0.39   0
  -3  -9   5   56.07    0.31   0
  -3  -9   6    3.23    0.18   0
  -3  -8  11   41.39    0.16   0
  -3  -6 -10  189.88    0.56   0
  -3  -4  18   21.80    0.19   0
  -3  -3 -13   33.32    0.31   0
  -3   0 -13    0.04    0.14   0
  -3   1  18   36.34    0.32   0
  -3   2  17   55.64    0.37   0
  -3   3  16    1.71    0.24   0
  -3   4  14    7.73    0.24   0
  -3   5  12   37.87    0.31   0
  -3   6   7  443.23    0.72   0
  -3   6   8   61.61    0.35   0
  -2  -7  -4   34.97    0.27   0
  -2  -6  -7   19.08    0.25   0
  -2  -5  -9    2.02    0.15   0
  -2  -4 -10  255.86    0.56   0
  -2  -4  15    3.17    0.11   0
  -2  -2 -11   90.70    0.33   0
  -2  -2  16   69.00    0.27   0
  -2  -1 -11   78.53    0.28   0
  -2  -1  16  303.21    0.54   0
  -2   1  15   74.44    0.34   0
  -2   2  14   83.33    0.35   0
  -2   3  12    8.78    0.16   0
  -2   4  10  418.31    0.67   0
  -2   5   0   66.86    0.22   0
  -2   5   4  170.39    0.39   0
  -1  -6  -1   58.30    0.25   0
  -1  -6   0   20.69    0.17   0
  -1  -6   5   43.71    0.16   0
  -1  -4  -6  180.37    0.41   0
  -1  -3  -7   81.10    0.28   0
  -1  -2  12    8.38    0.11   0
  -1  -1  12    1.52    0.11   0
  -1   1  11   61.44    0.25   0
  -1   2   9    0.46    0.15   0
  -1   3  -2  260.38    0.24   0
  -1   3   6 1230.74    0.90   0
   0  -3   1    0.65    0.06   0
   0  -3   2   51.70    0.12   0
   0   0   4  256.76    0.24   0
  -9   4 -18   17.94    0.29   0
  -8  -4 -19    0.11    0.41   0
  -8   3 -18    0.19    0.20   0
  -8   4 -17    1.48    0.19   0
  -8  10  10   -0.13    0.29   0
  -7  -9 -12   39.06    0.61   0
  -7  -8 -14   15.82    0.50   0
  -7   3 -17    2.23    0.16   0
  -7   4 -16   24.55    0.20   0
  -7   6 -13   15.79    0.11   0
  -7   6  21   15.64    0.39   0
  -7   7  19   28.96    0.43   0
  -7   8  17   12.98    0.44   0
  -7   9  -5   77.03    0.32   0
  -6 -11  -4   14.70    0.44   0
  -6 -10  -8   14.05    0.47   0
  -6  -7 -14   31.99    0.46   0
  -6  -4 -17    0.87    0.33   0
  -6   0  25   -0.39    0.37   0
  -6   1 -17    3.84    0.25   0
  -6   1  25    2.48    0.38   0
  -6   2  24    0.44    0.34   0
  -6   6  19    5.98    0.31   0
  -6   7  17   16.76    0.44   0
  -6   9  -1   13.95    0.26   0
  -6   9   7   11.13    0.26   0
  -5  -8 -11    7.76    0.35   0
  -5  -6 -14    9.52    0.34   0
  -5  -5 -15    1.28    0.30   0
  -5  -5  22    0.86    0.18   0
  -5  -3 -16  132.77    0.54   0
  -5   4 -13   44.60    0.17   0
  -5   5  19    9.47    0.38   0
  -5   8  -3   10.32    0.18   0
  -5   8   9    0.71    0.20   0
  -4 -10   0    2.58    0.24   0
  -4 -10   1   11.00    0.28   0
  -4 -10   2   57.19    0.42   0
  -4 -10   3    0.19    0.26   0
  -4 -10   4   16.60    0.31   0
  -4 -10   5   14.90    0.25   0
  -4  -9  -5    1.70    0.28   0
  -4  -8  -8   31.51    0.37   0
  -4  -6 -12    1.87    0.27   0
  -4  -5  20   42.29    0.24   0
  -4  -4 -14   11.55    0.29   0
  -4   1  21   14.86    0.31   0
  -4   2  20   41.62    0.37   0
  -4   3  19    1.73    0.21   0
  -4   4  18    9.38    0.35   0
  -4   5  16    6.63    0.30   0
  -4   6  14    8.51    0.29   0
  -4   7  10   12.74    0.30   0
  -3  -9   1    0.70    0.19   0
  -3  -9   2   21.82    0.25   0
  -3  -9   3   53.33    0.30   0
  -3  -9   4   47.47    0.30   0
  -3  -7  -8   51.96    0.37   0
  -3  -6  16   71.04    0.15   0
  -3  -4 -12    4.43    0.24   0
  -3  -2  19    1.83    0.18   0
  -3  -1  19    5.15    0.20   0
  -3   0  19   -0.15    0.22   0
  -3   4  15   17.60    0.29   0
  -3   5  13    0.30    0.21   0
  -3   6  -3   52.58    0.19   0
  -3   6   9   65.96    0.36   0
  -2  -7  -3    6.12    0.20   0
  -2  -5  -8   80.36    0.34   0
  -2  -5  14    3.45    0.08   0
  -2  -3 -10   13.34    0.20   0
  -2   0  16   89.44    0.33   0
  -2   3  13   -0.10    0.19   0
  -2   4  11   34.97    0.27   0
  -2   5  -1   40.74    0.17   0
  -2   5   7   78.25    0.32   0
  -1  -6   1    0.15    0.12   0
  -1  -6   3    6.06    0.13   0
  -1  -5  -4    5.89    0.12   0
  -1  -4  11   50.37    0.10   0
  -1  -3  12   11.96    0.10   0
  -1   0  -7   -0.16    0.08   0
  -1   0  12  326.36    0.49   0
  -1   2  10  253.97    0.47   0
  -1   3   7  198.47    0.40   0
   0  -2  -1  431.44    0.33   0
   0  -1  -1   11.64    0.06   0
   0  -1   6    0.87    0.06   0
   0   0   5    0.18    0.07   0
  -8  -6 -17    0.56    0.47   0
  -8  -5 -18   -0.25    0.45   0
  -8  -3 -19    4.84    0.39   0
  -8   1 -19    3.18    0.27   0
  -8  10  -3    1.92    0.21   0
  -7 -10  -9    1.91    0.48   0
  -7  -7 -15   11.83    0.42   0
  -7  -6 -16   73.10    0.60   0
  -7  -5 -17   10.76    0.46   0
  -7   1 -18    6.81    0.25   0
  -7   7  20   35.05    0.58   0
  -7   8  -9    1.41    0.10   0
  -7   8  18    2.33    0.42   0
  -7  10   1    5.47    0.29   0
  -7  10   2   13.06    0.29   0
  -7  10   3   69.91    0.45   0
  -7  10   4   29.40    0.37   0
  -7  10   5   22.61    0.37   0
  -7  10   6   -0.35    0.34   0
  -7  10   7    9.73    0.37   0
  -7  10   8    0.16    0.32   0
  -6 -11  -3   11.93    0.42   0
  -6 -11  -2    0.94    0.39   0
  -6 -10  -7   22.98    0.47   0
  -6  -9 -10   10.91    0.42   0
  -6  -8 -12   10.39    0.42   0
  -6  -2 -17   -0.21    0.26   0
  -6   4  23   26.13    0.52   0
  -6   6  20    0.44    0.42   0
  -6   7  18   89.09    0.62   0
  -6   9  -2   45.59    0.32   0
  -5 -10  -4    3.37    0.34   0
  -5  -9  -8    6.61    0.29   0
  -5  -9  15    8.62    0.14   0
  -5  -8 -10    1.80    0.32   0
  -5  -7 -12    0.00    0.28   0
  -5  -7  20   22.84    0.15   0
  -5  -6 -13   27.84    0.37   0
  -5  -4  23   10.61    0.26   0
  -5  -2 -16   83.82    0.44   0
  -5  -2  24    3.85    0.31   0
  -5   0 -16    1.50    0.18   0
  -5   0  24    9.70    0.38   0
  -5   2 -15    0.48    0.14   0
  -5   3 -14    1.37    0.14   0
  -5   3  22   47.14    0.50   0
  -5   4  21   15.07    0.43   0
  -4  -7 -10   28.99    0.31   0
  -4  -6  19    0.12    0.12   0
  -4  -4  21   16.96    0.22   0
  -4  -3 -14   66.97    0.39   0
  -4  -1  22    0.36    0.25   0
  -4   1 -14   10.50    0.17   0
  -4   3  20    2.61    0.32   0
  -4   5  17    0.31    0.30   0
  -4   7  -4  146.14    0.30   0
  -3  -8  -4    0.77    0.24   0
  -3  -7  -7    6.81    0.26   0
  -3  -6  -9   36.18    0.32   0
  -3  -3 -12  426.48    0.72   0
  -3  -3  19    3.03    0.17   0
  -3   1 -12  237.84    0.40   0
  -3   1  19    5.47    0.27   0
  -3   2  18    0.52    0.24   0
  -2  -7  -2   52.99    0.29   0
  -2  -4  -9  181.27    0.44   0
  -2  -3  16   77.15    0.24   0
  -2  -2 -10  272.97    0.49   0
  -2   1  16  292.98    0.60   0
  -2   2  15   12.74    0.25   0
  -2   4  12    5.18    0.21   0
  -2   5  -2  108.82    0.24   0
  -2   5   8  102.79    0.37   0
  -1  -5  -3    9.40    0.16   0
  -1  -4  -5  204.75    0.42   0
  -1  -3  -6    0.92    0.13   0
  -1  -1  -7   26.22    0.15   0
  -1  -1  13   84.45    0.25   0
  -1   1  -6  207.10    0.22   0
  -1   1  12    2.03    0.15   0
  -1   3   8  548.81    0.67   0
   0  -2   6  222.36    0.16   0
  -8  -4 -18   10.11    0.43   0
  -8  -2 -19    1.21    0.34   0
  -8  -1 -19    3.99    0.35   0
  -8   2 -18   19.63    0.35   0
  -8   9  -8    3.23    0.15   0
  -8  10  -4    6.38    0.23   0
  -7 -11  -5   10.37    0.44   0
  -7 -10  -8   14.15    0.48   0
  -7  -9 -11    1.09    0.40   0
  -7  -8 -13    9.31    0.36   0
  -7  -7 -14   62.23    0.60   0
  -7  -4 -17   12.11    0.40   0
  -7  -2 -18   23.83    0.39   0
  -7  10   0   45.62    0.35   0
  -6 -11  -1   -0.00    0.36   0
  -6 -11   0   11.31    0.42   0
  -6 -10  -6   34.27    0.48   0
  -6  -9  -9    5.84    0.40   0
  -6  -8 -11   21.20    0.42   0
  -6  -7 -13   33.32    0.44   0
  -6  -6 -14   10.76    0.37   0
  -6  -5 -15    3.62    0.32   0
  -6  -4 -16   46.68    0.45   0
  -6   2 -16   68.42    0.31   0
  -6   2  25    5.71    0.40   0
  -6   5 -13    5.44    0.10   0
  -6   5  22    6.04    0.36   0
  -6   6  21    0.19    0.39   0
  -6   8  -7    7.27    0.13   0
  -6   8  16   11.75    0.44   0
  -6   9  11   13.82    0.37   0
  -5 -10  -3   -0.01    0.28   0
  -5 -10  -2    2.61    0.29   0
  -5 -10  11    2.05    0.18   0
  -5  -9  -7    9.47    0.34   0
  -5  -8  -9    1.25    0.29   0
  -5  -7 -11   63.18    0.47   0
  -5  -5 -14    0.20    0.22   0
  -5  -3 -15    4.09    0.27   0
  -5  -3  24    5.08    0.31   0
  -5   1  24    1.02    0.37   0
  -5   5  20   77.15    0.55   0
  -5   8  -4   34.79    0.22   0
  -4  -9  11   13.51    0.17   0
  -4  -7  -9    1.70    0.27   0
  -4  -6 -11  145.82    0.51   0
  -4  -5 -12  110.29    0.47   0
  -4  -4 -13   74.29    0.41   0
  -4  -2 -14   24.94    0.28   0
  -4  -2  22    6.61    0.24   0
  -4  -1 -14   12.42    0.22   0
  -4   0  22    0.54    0.28   0
  -4   1  22   -0.20    0.27   0
  -4   2 -13   47.29    0.22   0
  -4   2  21    0.06    0.24   0
  -4   4  19   34.95    0.40   0
  -4   6  15   24.16    0.29   0
  -4   7  12    0.06    0.28   0
  -4   8   3    0.56    0.19   0
  -4   8   4   24.46    0.27   0
  -4   8   5   15.93    0.26   0
  -3  -8  10   17.28    0.15   0
  -3  -7  -6   33.74    0.31   0
  -3  -5 -10   14.04    0.24   0
  -3  -2 -12  183.20    0.46   0
  -3  -1  20   41.00    0.29   0
  -3   0 -12  370.42    0.54   0
  -3   0  20  111.45    0.46   0
  -3   2 -11   52.70    0.19   0
  -3   3 -10    0.68    0.07   0
  -3   3  18   96.09    0.45   0
  -3   4  16   42.55    0.31   0
  -3   5  14   33.96    0.27   0
  -3   6  -4    4.87    0.11   0
  -3   7   4   85.65    0.34   0
  -2  -7  -1  135.35    0.38   0
  -2  -7   8  149.81    0.26   0
  -2  -5  -7    0.21    0.18   0
  -2  -4  -8   50.77    0.27   0
  -2  -3  -9   13.13    0.19   0
  -2  -2  17   53.26    0.26   0
  -2  -1  17    7.14    0.18   0
  -2   0  17    0.81    0.20   0
  -2   3  -7   63.41    0.09   0
  -2   3  14    1.04    0.15   0
  -1  -5  -2   77.92    0.27   0
  -1  -2  13    1.04    0.10   0
  -1   0  13    2.26    0.15   0
  -1   2  11    3.65    0.12   0
  -1   3   9   72.57    0.29   0
  -1   4   3    0.64    0.13   0
  -1   4   4   69.58    0.25   0
   0  -1   7   25.46    0.11   0
   0   0   6    7.71    0.09   0
  -9  -2 -19    1.55    0.38   0
  -9   6 -15   12.00    0.19   0
  -8  -7 -15    3.89    0.41   0
  -8  -6 -16   17.67    0.50   0
  -8  -5 -17    2.37    0.45   0
  -8  -3 -18    0.06    0.35   0
  -8   6 -14   66.08    0.22   0
  -8  11   3    5.71    0.35   0
  -8  11   4    1.80    0.33   0
  -8  11   5    9.32    0.37   0
  -7 -11  -4   25.93    0.54   0
  -7 -11  -3   15.35    0.46   0
  -7 -10  -7   16.66    0.47   0
  -7  -9 -10   25.96    0.48   0
  -7  -8 -12    2.61    0.39   0
  -7  -6 -15    0.65    0.40   0
  -7  -5 -16   14.29    0.42   0
  -7  -3 -17    1.79    0.32   0
  -7   2 -17    1.36    0.20   0
  -7   9  -6   13.24    0.19   0
  -7  10  -1    2.46    0.23   0
  -7  10  12   14.06    0.43   0
  -6 -11   2    3.01    0.34   0
  -6 -11   9   -0.12    0.22   0
  -6 -10  -5   51.94    0.53   0
  -6  -9  -8    2.29    0.38   0
  -6  -7 -12    2.33    0.31   0
  -6  -3 -16    0.43    0.29   0
  -6   3 -15    0.62    0.16   0
  -6   4  24    4.49    0.49   0
  -6   5  23    9.49    0.51   0
  -6   8  17    4.98    0.42   0
  -6   9  -3   21.14    0.21   0
  -5 -10  10   24.83    0.25   0
  -5  -9  -6   13.36    0.34   0
  -5  -6 -12   30.83    0.37   0
  -5  -5 -13   10.61    0.30   0
  -5  -4 -14   14.78    0.31   0
  -5  -2 -15    0.33    0.25   0
  -5   1 -15    5.70    0.17   0
  -5   2  24    4.22    0.38   0
  -5   4  22   18.24    0.46   0
  -5   5  21   10.58    0.43   0
  -5   8  14   39.40    0.43   0
  -5   9   2   11.15    0.24   0
  -5   9   3    1.25    0.21   0
  -5   9   4   18.04    0.29   0
  -5   9   5   40.04    0.35   0
  -4  -9  -2   47.88    0.37   0
  -4  -8  -6   31.27    0.34   0
  -4  -6 -10   28.33    0.31   0
  -4  -3 -13   -0.06    0.24   0
  -4  -3  22   13.51    0.24   0
  -4   2  22    6.29    0.32   0
  -4   3 -12  201.88    0.31   0
  -4   3  21   15.25    0.38   0
  -4   4  20   15.94    0.40   0
  -4   5  18  183.37    0.63   0
  -4   6  16    0.51    0.28   0
  -4   8   1    2.72    0.16   0
  -4   8   2   39.86    0.27   0
  -4   8   6    0.69    0.17   0
  -4   8   8   81.75    0.43   0
  -3  -8  -2   14.13    0.24   0
  -3  -6  -8    6.14    0.18   0
  -3  -5  -9   19.41    0.24   0
  -3  -4  19    7.12    0.16   0
  -3  -3 -11    4.41    0.18   0
  -3  -2  20   13.19    0.22   0
  -3   1  20   42.51    0.36   0
  -3   2  19    1.22    0.20   0
  -3   4  17    2.39    0.29   0
  -3   5  15   10.50    0.29   0
  -3   6  12    0.81    0.18   0
  -3   7   1  118.44    0.34   0
  -3   7   2    0.15    0.14   0
  -3   7   3   15.08    0.19   0
  -3   7   5   74.09    0.31   0
  -3   7   6   16.16    0.26   0
  -3   7   7    3.02    0.24   0
  -2  -7   0   84.97    0.31   0
  -2  -7   1    4.65    0.17   0
  -2  -7   7  104.85    0.25   0
  -2  -6  -4    0.02    0.17   0
  -2   1  -9   12.76    0.11   0
  -2   1  17    1.44    0.24   0
  -2   2  16   64.88    0.36   0
  -2   3  15    7.29    0.25   0
  -2   4  13    0.58    0.16   0
  -2   5  10   48.46    0.27   0
  -2   5  11    2.83    0.20   0
  -1  -5  -1   89.29    0.27   0
  -1  -5   8  494.59    0.25   0
  -1  -4  -4   85.86    0.25   0
  -1  -3  -5   10.35    0.15   0
  -1  -2  -6    6.78    0.13   0
  -1   1  13   87.84    0.31   0
  -1   2  12    9.75    0.18   0
  -1   3  10    4.27    0.17   0
  -1   4   1    8.75    0.11   0
  -1   4   2    1.08    0.10   0
  -1   4   6   56.75    0.25   0
   0  -2   1  420.10    0.25   0
   0   0   7    0.28    0.08   0
   0   1   2  634.34    0.35   0
   0   1   3  138.77    0.19   0
   0   1   4  239.54    0.28   0
   0   1   5  116.96    0.22   0
  -9  -4 -18   25.68    0.50   0
  -9  -1 -19    1.51    0.36   0
  -9   0 -19   -0.20    0.29   0
  -9   4 -17   12.10    0.24   0
  -8  -9 -11    2.94    0.42   0
  -8  -8 -13    7.96    0.38   0
  -8  -7 -14    3.49    0.39   0
  -8  -1 -18    0.50    0.29   0
  -8   0 -18    5.75    0.33   0
  -8   1 -18    0.15    0.24   0
  -8  10  -5   33.68    0.28   0
  -8  11   1    5.12    0.33   0
  -8  11   2    0.43    0.30   0
  -7 -11  -2    3.10    0.41   0
  -7  -9  -9    0.73    0.37   0
  -7  -7 -13   19.70    0.43   0
  -7  -4 -16   25.09    0.38   0
  -7   1 -17   19.21    0.27   0
  -7   3 -16    2.50    0.18   0
  -7  10  -2   17.83    0.28   0
  -7  10  13    2.86    0.47   0
  -6 -11   3   13.68    0.37   0
  -6 -11   4    3.92    0.29   0
  -6 -11   6   24.96    0.43   0
  -6 -11   7    7.48    0.31   0
  -6 -10  -4    3.70    0.36   0
  -6 -10  14    3.33    0.21   0
  -6  -8 -10   28.35    0.42   0
  -6  -6 -13    1.85    0.32   0
  -6  -5 -14   30.89    0.38   0
  -6  -4 -15    5.08    0.32   0
  -6  -2 -16   72.65    0.43   0
  -6  -1 -16   41.35    0.34   0
  -6   0 -16   27.68    0.29   0
  -6   1 -16   46.16    0.29   0
  -6   4 -14   17.88    0.16   0
  -6   6  22   52.06    0.62   0
  -6   7  20   33.58    0.51   0
  -6   8  18   17.55    0.50   0
  -6   9  -4    5.26    0.17   0
  -6  10   4    1.15    0.28   0
  -6  10   5   78.30    0.47   0
  -6  10   6    0.39    0.31   0
  -6  10   7    2.63    0.30   0
  -5 -10   0   12.54    0.30   0
  -5 -10   1   -0.14    0.26   0
  -5 -10   9    0.18    0.20   0
  -5  -9  -5    0.33    0.30   0
  -5  -8  -8   22.83    0.36   0
  -5  -7 -10   12.48    0.33   0
  -5  -5  23   36.27    0.27   0
  -5  -4  24    0.00    0.25   0
  -5  -2  25    7.10    0.33   0
  -5  -1 -15    6.40    0.23   0
  -5  -1  25   -0.10    0.31   0
  -5   0 -15    0.13    0.17   0
  -5   0  25    0.17    0.34   0
  -5   1  25   -0.18    0.35   0
  -5   4  23   10.17    0.41   0
  -5   6  20   22.32    0.47   0
  -5   7  18   28.89    0.45   0
  -5   9   1   32.65    0.27   0
  -5   9   8  132.88    0.57   0
  -4  -9  -1    0.41    0.24   0
  -4  -9   0   24.18    0.28   0
  -4  -9  10    9.19    0.16   0
  -4  -8  -5   23.69    0.31   0
  -4  -7  -8    4.81    0.20   0
  -4  -5 -11   21.62    0.29   0
  -4  -4 -12   54.96    0.35   0
  -4  -2 -13   45.46    0.31   0
  -4  -2  23    3.25    0.28   0
  -4   0  23   -0.23    0.28   0
  -4   1 -13    5.25    0.14   0
  -4   1  23    6.26    0.32   0
  -4   5  19   12.54    0.38   0
  -4   6  17   14.85    0.36   0
  -4   7  -5   19.88    0.14   0
  -4   7  14    4.99    0.24   0
  -4   8   0    6.84    0.16   0
  -4   8   9   14.25    0.28   0
  -4   8  10    0.34    0.28   0
  -3  -8  -1   85.51    0.35   0
  -3  -8   0   18.97    0.24   0
  -3  -8   9    3.31    0.14   0
  -3  -6  -7    8.58    0.23   0
  -3  -5  18   71.77    0.22   0
  -3  -4 -10  643.73    0.86   0
  -3  -3  20   16.28    0.22   0
  -3   4  18   22.60    0.33   0
  -3   5  -7   13.49    0.05   0
  -3   5  16   37.52    0.37   0
  -3   6  13    0.18    0.18   0
  -3   7   0    1.11    0.13   0
  -3   7   8   10.48    0.20   0
  -3   7   9   13.15    0.27   0
  -2  -7   2   27.92    0.19   0
  -2  -7   3    6.14    0.15   0
  -2  -7   6   63.84    0.22   0
  -2  -6  -3  115.29    0.36   0
  -2  -4  -7   11.72    0.19   0
  -2  -3  17    1.43    0.15   0
  -2  -2  -9  244.09    0.43   0
  -2  -1  18  117.91    0.38   0
  -2   0  -9    0.23    0.10   0
  -2   0  18  392.98    0.68   0
  -2   2  -8   11.55    0.09   0
  -2   2  17   52.60    0.35   0
  -2   3  16   91.89    0.41   0
  -2   4  14   26.82    0.29   0
  -2   5  -3    5.61    0.09   0
  -2   5  12   32.40    0.29   0
  -2   6   2   88.60    0.29   0
  -2   6   4  200.57    0.45   0
  -2   6   5  121.43    0.38   0
  -2   6   6   46.69    0.28   0
  -2   6   7    2.14    0.18   0
  -1  -5   0  321.68    0.44   0
  -1  -4  -3   51.70    0.22   0
  -1  -3  13    1.55    0.08   0
  -1  -2  14   89.51    0.26   0
  -1  -1  14  126.92    0.32   0
  -1   0  -6   63.37    0.16   0
  -1   0  14   44.07    0.23   0
  -1   2  13    1.22    0.17   0
  -1   3  -3    0.55    0.04   0
  -1   3  11   91.74    0.34   0
  -1   4   0  234.70    0.32   0
  -1   4   7   13.32    0.15   0
  -1   4   8  518.84    0.69   0
   0  -2   7   38.54    0.09   0
   0  -1   8  150.72    0.24   0
   0   0   8  128.74    0.25   0
   0   1   6    1.18    0.09   0
  -9  -6 -16   -0.17    0.41   0
  -9  -5 -17   -0.08    0.34   0
  -9   2 -18   39.55    0.47   0
  -9   5 -16    3.16    0.18   0
  -8  -9 -10   44.37    0.55   0
  -8  -8 -12    2.53    0.41   0
  -8  -6 -15   25.05    0.50   0
  -8  -5 -16   24.79    0.49   0
  -8   4 -16    4.02    0.20   0
  -8   5 -15    4.56    0.17   0
  -7 -10  -6   14.21    0.39   0
  -7  -8 -11    2.20    0.30   0
  -7  -6 -14   10.00    0.36   0
  -7  -5 -15   14.28    0.38   0
  -7  -1 -17   17.39    0.31   0
  -7   0 -17    0.10    0.25   0
  -7   4 -15    1.08    0.15   0
  -7   5 -14   43.09    0.19   0
  -6 -10  -3   19.53    0.41   0
  -6  -9  -7    1.50    0.25   0
  -6  -8  -9    0.03    0.33   0
  -6  -7 -11    0.15    0.32   0
  -6  -3 -15    0.68    0.26   0
  -6   8  19   -0.31    0.42   0
  -6   9  15    0.13    0.40   0
  -6  10   2   13.46    0.28   0
  -6  10   8    9.03    0.34   0
  -6  10   9    0.36    0.34   0
  -5 -10   2    8.46    0.28   0
  -5 -10   7    2.12    0.24   0
  -5 -10   8    0.28    0.21   0
  -5  -9  -4   71.41    0.47   0
  -5  -8  -7   22.04    0.35   0
  -5  -7  -9   72.91    0.43   0
  -5  -6 -11    6.31    0.28   0
  -5  -6  22   14.36    0.19   0
  -5  -5 -12   30.34    0.32   0
  -5  -4 -13   43.87    0.37   0
  -5  -3 -14    1.58    0.18   0
  -5  -3  25    1.51    0.29   0
  -5   2 -14   43.30    0.22   0
  -5   3  24    5.13    0.37   0
  -5   5  22    0.57    0.41   0
  -5   8  -5  126.41    0.31   0
  -5   9   0    0.41    0.18   0
  -4  -9   1    1.94    0.20   0
  -4  -9   9   12.63    0.19   0
  -4  -8  -4   53.78    0.38   0
  -4  -7  -7   25.35    0.32   0
  -4  -6  -9    8.95    0.25   0
  -4  -5  21   11.93    0.18   0
  -4  -4  22   14.63    0.24   0
  -4  -1 -13    5.83    0.19   0
  -4   0 -13   -0.14    0.14   0
  -4   2  23    3.08    0.35   0
  -4   3  22   15.14    0.39   0
  -4   4  21   18.52    0.41   0
  -4   5  20   43.09    0.50   0
  -4   6  18   14.06    0.37   0
  -4   7  15   59.28    0.41   0
  -4   8  -1    8.15    0.15   0
  -3  -8   1   17.12    0.23   0
  -3  -8   2  199.13    0.48   0
  -3  -8   8    0.50    0.13   0
  -3  -7  -4  129.67    0.44   0
  -3  -2 -11   41.36    0.23   0
  -3  -2  21   16.12    0.27   0
  -3  -1 -11    6.82    0.15   0
  -3   0  21    2.29    0.24   0
  -3   1 -11    5.72    0.12   0
  -3   1  21    5.33    0.29   0
  -3   5  17    1.87    0.30   0
  -3   6  14    0.05    0.18   0
  -3   7  -1    0.97    0.12   0
  -3   7  11    0.18    0.28   0
  -2  -7   4   20.87    0.17   0
  -2  -7   5   16.51    0.15   0
  -2  -5  -5    5.18    0.17   0
  -2  -3  -8   12.64    0.15   0
  -2  -2  18   37.05    0.24   0
  -2   1  18  115.88    0.44   0
  -2   4  15    3.64    0.25   0
  -2   5  13   12.80    0.25   0
  -2   6   8    9.19    0.23   0
  -1  -5   1   11.63    0.13   0
  -1  -3  -4  203.35    0.35   0
  -1  -2  -5  217.40    0.34   0
  -1   1  14  115.47    0.34   0
  -1   3  12   11.58    0.20   0
  -1   4   9   19.24    0.21   0
   0   1   1   10.76    0.06   0
   0   1   7   22.24    0.13   0
  -9  -7 -14    1.18    0.45   0
  -9   1 -18    5.83    0.31   0
  -8 -10  -7   13.06    0.48   0
  -8  -7 -13    3.45    0.39   0
  -8  -4 -16    3.11    0.34   0
  -8  -3 -17    8.16    0.35   0
  -8   2 -17    0.71    0.25   0
  -8  11  -1    3.32    0.29   0
  -7 -11   0    5.90    0.37   0
  -7 -10  -5   15.94    0.42   0
  -7  -9  -8   23.36    0.46   0
  -7  -8 -10   47.65    0.49   0
  -7  -7 -12   14.46    0.40   0
  -7  -3 -16    2.42    0.30   0
  -7   2 -16   13.73    0.26   0
  -7   9  -7    2.15    0.14   0
  -7  10  -3   28.10    0.27   0
  -7  11   4    1.37    0.32   0
  -7  11   7    0.44    0.38   0
  -7  11   8   57.65    0.58   0
  -6 -10  -2   21.44    0.40   0
  -6  -6 -12   37.76    0.40   0
  -6  -5 -13    5.78    0.31   0
  -6   2 -15   20.93    0.21   0
  -6   9  16    4.37    0.36   0
  -6   9  17    0.57    0.42   0
  -6  10   0    8.54    0.26   0
  -6  10   1   48.68    0.35   0
  -6  10  11    2.20    0.39   0
  -5 -10   5    7.07    0.25   0
  -5 -10   6    0.12    0.21   0
  -5  -9  -3    6.28    0.30   0
  -5  -8  -6   85.94    0.46   0
  -5  -2 -14   45.83    0.35   0
  -5   1 -14   43.33    0.25   0
  -5   3 -13   13.85    0.15   0
  -5   3  25    1.23    0.38   0
  -5   4  24   -0.08    0.43   0
  -5   5 -11    5.18    0.08   0
  -5   7  -8    2.69    0.07   0
  -5   9  -1   14.27    0.21   0
  -5   9  12    0.65    0.25   0
  -4  -9   2    1.61    0.19   0
  -4  -9   3    8.27    0.21   0
  -4  -9   4   23.87    0.27   0
  -4  -9   5   25.27    0.27   0
  -4  -9   7   78.04    0.37   0
  -4  -8  -3   20.74    0.29   0
  -4  -8  14   14.07    0.12   0
  -4  -7  -6   18.75    0.28   0
  -4  -5 -10  132.90    0.46   0
  -4  -3 -12  190.91    0.50   0
  -4  -3  23    5.43    0.23   0
  -4   0  24   55.77    0.44   0
  -4   1  24   20.46    0.44   0
  -4   4  22   14.97    0.40   0
  -4   7  16   16.07    0.30   0
  -4   8  -2   14.57    0.19   0
  -4   8  13   50.17    0.47   0
  -3  -8   4    0.83    0.16   0
  -3  -8   5    9.42    0.18   0
  -3  -8   6   11.19    0.18   0
  -3  -8   7  208.08    0.44   0
  -3  -7  -3  245.71    0.55   0
  -3  -6  -6  151.71    0.43   0
  -3  -4  -9   31.98    0.26   0
  -3  -3 -10    0.79    0.16   0
  -3   0 -11   -0.01    0.12   0
  -3   2  21   16.74    0.34   0
  -3   3  20   15.02    0.33   0
  -3   6  -5    5.35    0.09   0
  -3   6  15   30.97    0.30   0
  -2  -6  -2   40.49    0.21   0
  -2  -4  -6  104.11    0.33   0
  -2  -2  -8   12.45    0.17   0
  -2   0  19    8.88    0.26   0
  -2   2  18   37.54    0.34   0
  -2   3  17    1.64    0.26   0
  -2   4  16   13.88    0.28   0
  -2   5  14    3.91    0.24   0
  -2   6   0   50.00    0.21   0
  -2   6  10    4.30    0.23   0
  -1  -5   2   30.40    0.15   0
  -1  -5   7    0.62    0.06   0
  -1  -4  -2    0.12    0.12   0
  -1  -1  15   19.41    0.18   0
  -1   0  15    0.61    0.15   0
  -1   1  15   17.35    0.24   0
  -1   2  14   89.75    0.35   0
  -1   3  13    1.55    0.19   0
  -1   4  -1   91.01    0.19   0
  -1   4  10  300.77    0.54   0
  -1   4  11   48.99    0.28   0
   0  -1   9   27.02    0.13   0
   0   0   9    0.59    0.10   0
   0   1   8  119.09    0.26   0
   0   2   3  281.22    0.32   0
   0   2   4  167.69    0.28   0
   0   2   5   74.13    0.21   0
   0   2   6  211.62    0.35   0
  -9  -8 -12   11.63    0.51   0
  -9  -6 -15   11.80    0.42   0
  -9  -5 -16    3.08    0.34   0
  -9  -3 -17    3.70    0.33   0
  -9  -1 -18    5.89    0.37   0
  -9   0 -18   16.14    0.34   0
  -9   3 -17    3.24    0.27   0
  -8 -10  -6    5.90    0.46   0
  -8  -9  -9    2.99    0.32   0
  -8  -8 -11    6.34    0.40   0
  -8  -6 -14   55.41    0.58   0
  -8  -5 -15    4.26    0.39   0
  -8  -1 -17    1.70    0.30   0
  -8  10  -6    6.68    0.19   0
  -7 -10  -4   10.88    0.39   0
  -7  -9  -7    2.05    0.36   0
  -7  -6 -13   14.32    0.30   0
  -7  -5 -14   45.19    0.47   0
  -7  -4 -15    1.36    0.23   0
  -7  -2 -16   14.16    0.32   0
  -7  10  -4   12.19    0.22   0
  -7  11   2    8.91    0.30   0
  -7  11   3   60.87    0.46   0
  -6 -10   0    6.81    0.30   0
  -6  -9  -5   85.81    0.56   0
  -6  -8  -8   13.45    0.29   0
  -6  -7 -10    5.16    0.30   0
  -6  -2 -15   18.36    0.30   0
  -6  -1 -15   -0.16    0.23   0
  -6   1 -15   -0.24    0.19   0
  -6   9  -5   87.67    0.30   0
  -6  10  -1    0.48    0.23   0
  -6  10  13    9.79    0.47   0
  -6  10  14   20.54    0.48   0
  -5  -9  -2  107.41    0.50   0
  -5  -7  -8    2.49    0.27   0
  -5  -6 -10   17.35    0.24   0
  -5  -5 -11    4.96    0.24   0
  -5  -3 -13   15.75    0.28   0
  -5   0 -14    5.05    0.19   0
  -5   6  22   28.31    0.56   0
  -5   8  18    0.97    0.41   0
  -5   9  -2  105.57    0.36   0
  -5   9  14    0.92    0.41   0
  -4  -9   6   85.94    0.37   0
  -4  -8  -2   13.42    0.25   0
  -4  -6  -8   62.31    0.33   0
  -4  -2  24   26.38    0.32   0
  -4   2  24   26.48    0.43   0
  -4   3  23    5.17    0.29   0
  -4   7  17    7.61    0.27   0
  -4   8  14   15.11    0.38   0
  -4   9   4   26.93    0.28   0
  -4   9   5   28.06    0.32   0
  -4   9   6   92.76    0.46   0
  -4   9   7   92.20    0.47   0
  -4   9   8   19.91    0.30   0
  -3  -7  -2   13.67    0.22   0
  -3  -7  13   59.27    0.13   0
  -3  -6  -5    5.37    0.21   0
  -3  -5  -7   13.98    0.22   0
  -3  -4  20   22.19    0.20   0
  -3  -3  21   15.05    0.22   0
  -3  -2 -10  820.79    0.84   0
  -3  -1  22   19.46    0.28   0
  -3   0  22   62.87    0.40   0
  -3   1  22   20.08    0.32   0
  -3   2 -10  819.02    0.59   0
  -3   3  21   15.94    0.37   0
  -3   5  18   70.11    0.42   0
  -3   6  16   69.99    0.41   0
  -3   7  -2   14.11    0.15   0
  -3   7  13   65.37    0.42   0
  -3   8   6   13.01    0.26   0
  -3   8   7  224.29    0.60   0
  -2  -6  -1    5.60    0.15   0
  -2  -5  -4  176.55    0.40   0
  -2  -5  15   48.02    0.13   0
  -2  -3  -7   65.40    0.26   0
  -2  -3  18   87.65    0.29   0
  -2  -1  19    9.47    0.20   0
  -2   1  19    8.61    0.28   0
  -2   3  18   90.61    0.45   0
  -2   5  15   49.65    0.35   0
  -2   6  -1    4.91    0.13   0
  -2   6  11    0.26    0.16   0
  -2   6  12   19.28    0.29   0
  -1  -5   4  670.25    0.52   0
  -1  -5   6  159.60    0.21   0
  -1  -4  12   46.94    0.11   0
  -1  -3  14    0.32    0.09   0
  -1  -2  15   70.79    0.25   0
  -1  -1  -5   39.81    0.15   0
  -1   1  -5   38.83    0.10   0
  -1   2  15   73.40    0.34   0
  -1   3  14    0.70    0.20   0
  -1   4  12   50.37    0.31   0
  -1   5   3    0.44    0.14   0
  -1   5   4  674.25    0.73   0
  -1   5   6  162.11    0.40   0
  -1   5   8  501.81    0.71   0
   0  -2   8  787.11    0.41   0
   0   0  10  367.27    0.46   0
   0   1   9   23.12    0.15   0
   0   2   7   38.13    0.17   0
   0   2   8  821.92    0.74   0
 -10  -2 -18   20.24    0.53   0
 -10  -1 -18    0.82    0.40   0
 -10   2 -18   25.22    0.37   0
  -9  -9  -9    6.64    0.44   0
  -9  -8 -11    2.41    0.41   0
  -9  -7 -13    0.89    0.41   0
  -9  -4 -16    0.71    0.34   0
  -8 -11   0    0.19    0.39   0
  -8 -10  -5   31.75    0.54   0
  -8  -8 -10    0.30    0.38   0
  -8  -7 -12   48.64    0.56   0
  -8   3 -16    5.36    0.23   0
  -7 -11   4    0.51    0.31   0
  -7 -11   6    5.19    0.33   0
  -7 -11   7    0.26    0.30   0
  -7 -10  -3   22.40    0.45   0
  -7  -9  -6   12.13    0.41   0
  -7  -7 -11    2.14    0.23   0
  -7  -6 -12    3.26    0.30   0
  -7  -3 -15    0.39    0.29   0
  -7  -1 -16   10.71    0.27   0
  -7   0 -16  128.34    0.47   0
  -7   1 -16   11.22    0.25   0
  -7  11   1    4.86    0.27   0
  -6 -10   1   40.61    0.43   0
  -6  -9  -4    5.73    0.32   0
  -6  -8  -7    7.52    0.35   0
  -6  -7  -9    0.01    0.28   0
  -6  -6 -11   49.60    0.42   0
  -6  -5 -12    0.18    0.24   0
  -6  -4 -13    3.77    0.26   0
  -6  -3 -14  231.23    0.66   0
  -6   0 -15    0.20    0.21   0
  -6   3 -14  231.98    0.45   0
  -6   8  -8   13.36    0.11   0
  -5  -9  -1   13.74    0.29   0
  -5  -8  -5  130.36    0.52   0
  -5  -6  -9    5.71    0.23   0
  -5  -4 -12    2.91    0.19   0
  -5  -2 -13  197.69    0.53   0
  -5   4 -12    2.65    0.09   0
  -5   7  21    0.27    0.47   0
  -5   8  -6   85.33    0.23   0
  -5   8  19    1.96    0.44   0
  -5  10   4   12.55    0.29   0
  -5  10   6    0.16    0.28   0
  -5  10   7    2.80    0.32   0
  -5  10   8    0.60    0.33   0
  -5  10   9    0.07    0.32   0
  -4  -6  20   24.07    0.15   0
  -4  -5  -9   17.82    0.24   0
  -4  -4 -10   78.08    0.36   0
  -4  -4  23   22.88    0.24   0
  -4  -1 -12  278.37    0.53   0
  -4   0  25    0.80    0.29   0
  -4   1 -12  273.22    0.45   0
  -4   1  25   12.18    0.42   0
  -4   4  23   24.67    0.47   0
  -4   5  22    0.31    0.44   0
  -4   6  20   30.61    0.39   0
  -4   7  18   40.22    0.46   0
  -4   8  -3   21.57    0.19   0
  -4   8  15   19.22    0.38   0
  -4   9   2    2.15    0.18   0
  -4   9   3    9.11    0.22   0
  -4   9  11   14.36    0.35   0
  -3  -4  -8  187.87    0.45   0
  -3  -3  -9    7.19    0.18   0
  -3  -2  22   38.58    0.31   0
  -3   2  22   41.36    0.41   0
  -3   7  14   45.19    0.36   0
  -3   7  15    0.63    0.31   0
  -3   8   2  190.17    0.47   0
  -3   8   3   10.74    0.21   0
  -3   8   8    0.59    0.18   0
  -3   8   9    3.52    0.26   0
  -3   8  10   18.03    0.31   0
  -2  -6   0   49.97    0.23   0
  -2  -5  -3    5.35    0.15   0
  -2  -4  -5  150.23    0.36   0
  -2  -2  19   45.13    0.26   0
  -2  -1  -8   87.00    0.25   0
  -2   0  -8   66.69    0.20   0
  -2   0  20    4.31    0.20   0
  -2   1  -8   84.38    0.19   0
  -2   2  19   45.43    0.35   0
  -2   4  17    3.27    0.20   0
  -2   5  -4  173.47    0.22   0
  -2   5  16  124.18    0.51   0
  -2   6  13    8.79    0.27   0
  -2   7   4   21.30    0.21   0
  -2   7   5   16.83    0.23   0
  -2   7   6   64.21    0.34   0
  -2   7   7  104.11    0.41   0
  -1  -5   5    0.96    0.08   0
  -1  -4  -1   92.94    0.24   0
  -1  -3  -3    0.60    0.11   0
  -1  -2  -4   53.05    0.18   0
  -1  -1  16  159.08    0.37   0
  -1   0  -5   -0.05    0.07   0
  -1   0  16  135.92    0.38   0
  -1   1  16  161.53    0.45   0
  -1   5   2   30.78    0.19   0
  -1   5   9    0.96    0.19   0
  -1   5  10   39.42    0.28   0
   0  -1  10   84.63    0.21   0
   0   1  10   79.86    0.24   0
   0   2   9   37.68    0.22   0
 -10  -3 -17   -0.26    0.39   0
 -10   0 -18  103.44    0.62   0
  -9  -6 -14   19.20    0.41   0
  -9  -5 -15    4.67    0.40   0
  -9  -2 -17    2.45    0.32   0
  -9  -1 -17   11.24    0.40   0
  -8  -9  -7   12.26    0.47   0
  -8  -6 -13    4.10    0.34   0
  -8  -5 -14    4.32    0.37   0
  -8  -4 -15   58.28    0.53   0
  -8  -2 -16    4.38    0.30   0
  -8   9  -9    3.13    0.11   0
  -7 -10  -2   13.80    0.40   0
  -7  -8  -8   46.66    0.44   0
  -7  -7 -10    0.94    0.31   0
  -7  -5 -13    0.63    0.30   0
  -7  -4 -14   36.36    0.42   0
  -7  -2 -15    1.53    0.24   0
  -7   3 -15    0.16    0.15   0
  -7  11   0    8.36    0.29   0
  -6 -10   2   10.20    0.31   0
  -6 -10   3    4.34    0.29   0
  -6  -9  -3   19.32    0.35   0
  -6  -2 -14   48.93    0.35   0
  -6  10  -2   25.66    0.26   0
  -6  11   5    1.21    0.34   0
  -6  11   8    0.31    0.38   0
  -6  11   9    0.29    0.35   0
  -5  -9   0    0.68    0.24   0
  -5  -9  13   24.85    0.20   0
  -5  -8  -4   35.56    0.34   0
  -5  -7  -7  101.48    0.44   0
  -5  -5 -10   12.62    0.25   0
  -5   2 -13  198.75    0.40   0
  -5   9  -3    6.72    0.18   0
  -5   9  17   -0.40    0.45   0
  -5  10   2   10.38    0.26   0
  -5  10   3   62.54    0.39   0
  -5  10  11    3.44    0.38   0
  -4  -8  -1    7.76    0.22   0
  -4  -7  -4  149.80    0.49   0
  -4  -5  22    0.00    0.16   0
  -4  -3  24   10.32    0.25   0
  -4  -1  25   12.20    0.32   0
  -4   2  25    3.41    0.41   0
  -4   3 -11    2.12    0.10   0
  -4   6  21    1.59    0.37   0
  -4   7  -6   18.44    0.12   0
  -4   7  19    1.52    0.38   0
  -4   8  16    0.80    0.27   0
  -4   8  17   40.73    0.47   0
  -4   9   1    2.03    0.18   0
  -4   9  12    0.25    0.35   0
  -3  -7   0    1.15    0.14   0
  -3  -6  17    1.20    0.06   0
  -3  -5  -6  126.82    0.39   0
  -3  -5  19    4.52    0.12   0
  -3  -1 -10    4.68    0.14   0
  -3  -1  23   21.70    0.32   0
  -3   0 -10  242.39    0.41   0
  -3   0  23    0.78    0.27   0
  -3   1 -10    5.10    0.11   0
  -3   1  23   23.45    0.37   0
  -3   3  22   14.56    0.38   0
  -3   4  21   10.53    0.35   0
  -3   6  18    3.74    0.31   0
  -3   7  -3  246.54    0.38   0
  -3   7  16   18.06    0.36   0
  -3   8   1   18.93    0.20   0
  -3   8  11   43.30    0.39   0
  -3   8  12   34.18    0.40   0
  -2  -6   1   11.31    0.14   0
  -2  -6  11    0.22    0.05   0
  -2  -3  -6  252.02    0.44   0
  -2  -2  -7  126.97    0.31   0
  -2  -1  20   50.57    0.30   0
  -2   1  20   46.93    0.35   0
  -2   2  20  119.58    0.50   0
  -2   3  19    4.34    0.29   0
  -2   6  -2   42.23    0.18   0
  -2   6  14   44.43    0.36   0
  -2   7   3    6.25    0.17   0
  -2   7   8  145.58    0.46   0
  -2   7   9   19.02    0.28   0
  -2   7  10   -0.01    0.26   0
  -1  -4   0  240.60    0.35   0
  -1  -2  16   29.65    0.21   0
  -1   0  17    4.55    0.21   0
  -1   1  17   16.37    0.25   0
  -1   2  16   31.13    0.28   0
  -1   3  15    0.07    0.16   0
  -1   4  -2    0.24    0.07   0
  -1   4  14   12.92    0.25   0
  -1   5   1   13.20    0.14   0
  -1   5  11   33.28    0.27   0
   0  -2   9   35.80    0.12   0
   0  -1  11    7.87    0.11   0
   0   1  11    9.05    0.15   0
   0   2  10   27.24    0.20   0
   0   3   4  621.48    0.58   0
   0   3   5   24.52    0.17   0
   0   3   6  327.93    0.45   0
   0   3   7   24.49    0.19   0
   0   3   8    7.01    0.16   0
 -10  -6 -14    1.64    0.44   0
 -10  -4 -16   22.46    0.50   0
 -10  -2 -17   12.45    0.39   0
  -9 -10  -5    4.49    0.45   0
  -9  -9  -8   21.86    0.53   0
  -9  -8 -10    0.16    0.39   0
  -9  -7 -12    3.90    0.32   0
  -9  -6 -13   18.53    0.46   0
  -9   0 -17   -0.02    0.29   0
  -8 -10  -3    1.76    0.35   0
  -8  -8  -9    0.77    0.36   0
  -8  -7 -11    2.51    0.27   0
  -8  -1 -16   11.16    0.28   0
  -8   2 -16    4.73    0.22   0
  -7 -10  -1    1.92    0.30   0
  -7  -9  -5   64.54    0.53   0
  -7  10  -5   19.99    0.22   0
  -7  11  -1    6.34    0.29   0
  -6 -10   4    0.91    0.25   0
  -6 -10   5   48.16    0.47   0
  -6 -10  10    3.83    0.23   0
  -6 -10  11    0.78    0.19   0
  -6  -9  -2   39.93    0.39   0
  -6  -9  17   -0.08    0.12   0
  -6  -8  -6   10.48    0.26   0
  -6  -7  -8    0.78    0.26   0
  -6  -6 -10   34.82    0.31   0
  -6  -5 -11    1.47    0.23   0
  -6  -3 -13   13.45    0.28   0
  -6  -1 -14   52.35    0.32   0
  -6   2 -14   44.62    0.25   0
  -6   9  -6    1.91    0.15   0
  -6  11   3   22.61    0.33   0
  -6  11   4    7.14    0.31   0
  -5  -9   1   30.16    0.31   0
  -5  -9   2    9.89    0.26   0
  -5  -8  -3    9.79    0.27   0
  -5  -7  -6   42.14    0.36   0
  -5  -6  -8   36.60    0.32   0
  -5  -4 -11   10.66    0.25   0
  -5  -3 -12    9.12    0.20   0
  -5   0 -13    0.46    0.15   0
  -5   1 -13   18.33    0.18   0
  -5  10   1    0.18    0.22   0
  -4  -8   0    7.34    0.21   0
  -4  -6  -6   15.16    0.23   0
  -4  -5  -8    3.65    0.19   0
  -4  -2 -11    0.41    0.17   0
  -4  -2  25    3.84    0.28   0
  -4   0  26    3.33    0.35   0
  -4   3  25    5.07    0.41   0
  -4   4  24   12.27    0.36   0
  -4   7  20   18.34    0.47   0
  -4   8  18    3.86    0.40   0
  -4   9   0   24.75    0.25   0
  -4   9  13   10.55    0.29   0
  -4   9  14   52.31    0.52   0
  -3  -6  -3   49.99    0.28   0
  -3  -4  -7   84.29    0.31   0
  -3  -4  21   10.80    0.19   0
  -3  -3  22   14.22    0.24   0
  -3  -2  -9   50.18    0.24   0
  -3   2  23   -0.37    0.30   0
  -3   3  -9    6.08    0.07   0
  -3   3  23    2.09    0.33   0
  -3   4  22   91.23    0.59   0
  -3   6  19   -0.02    0.35   0
  -3   7  17   74.08    0.53   0
  -3   8   0   18.15    0.20   0
  -3   8  13   13.68    0.36   0
  -2  -6   2   88.94    0.26   0
  -2  -5  -2  105.70    0.31   0
  -2  -3  19    4.07    0.18   0
  -2  -2  20  114.21    0.40   0
  -2   0  21    0.06    0.24   0
  -2   1  21    3.27    0.26   0
  -2   3  20   26.76    0.36   0
  -2   4  19   11.71    0.34   0
  -2   5  17    2.04    0.22   0
  -2   6  15   37.07    0.37   0
  -2   7   1    4.78    0.16   0
  -2   7   2   28.12    0.20   0
  -2   7  11   94.00    0.44   0
  -2   7  12   12.94    0.30   0
  -1  -3  -2  240.11    0.34   0
  -1  -3  15    0.06    0.10   0
  -1  -1  17   17.85    0.20   0
  -1   3  16  203.33    0.56   0
  -1   4  15   41.93    0.34   0
  -1   5   0  298.65    0.40   0
  -1   5  12    4.30    0.21   0
  -1   5  13   15.25    0.25   0
  -1   6   6    6.42    0.19   0
  -1   6   7   51.72    0.29   0
   0  -2   3  250.11    0.11   0
   0  -2  10   26.82    0.12   0
   0   0  12    1.28    0.12   0
   0   1   0    0.01    0.02   0
   0   1  12   25.01    0.20   0
   0   2  11    0.52    0.10   0
   0   3   3   29.13    0.13   0
   0   3   9    8.20    0.16   0
   0   3  10   25.32    0.21   0
 -10  -7 -12    6.85    0.46   0
 -10  -1 -17    1.97    0.38   0
  -9 -10  -4    2.19    0.41   0
  -9  -9  -7   10.91    0.49   0
  -9  -7 -11    1.16    0.34   0
  -9  -5 -14    3.19    0.35   0
  -9  -4 -15    4.07    0.35   0
  -9  -2 -16   14.29    0.35   0
  -9   5 -15    3.43    0.18   0
  -8 -11   4    0.18    0.33   0
  -8 -10  -2    0.16    0.34   0
  -8  -9  -6    7.27    0.31   0
  -8  -8  -8   60.98    0.58   0
  -8  -7 -10   26.82    0.46   0
  -8  -6 -12    1.27    0.23   0
  -8  -4 -14   47.56    0.46   0
  -8   0 -16    4.65    0.25   0
  -8   4 -15   51.11    0.25   0
  -8  10  -7   12.71    0.20   0
  -7 -10   1    3.97    0.31   0
  -7  -9  -4   17.62    0.39   0
  -7  -8  -7    0.21    0.31   0
  -7  -7  -9   31.32    0.41   0
  -7  -5 -12   15.15    0.33   0
  -7  -4 -13    7.91    0.30   0
  -7  -3 -14   12.04    0.25   0
  -7  -1 -15    3.68    0.20   0
  -7   1 -15    5.31    0.21   0
  -7   4 -14   36.43    0.21   0
  -6 -10   6    0.02    0.23   0
  -6 -10   7    1.88    0.23   0
  -6 -10   8    5.17    0.25   0
  -6 -10   9   -0.01    0.19   0
  -6  -8  -5   26.17    0.34   0
  -6  -4 -12   39.53    0.35   0
  -6   0 -14  264.53    0.56   0
  -6   1 -14   51.63    0.27   0
  -6  10  -3   20.89    0.24   0
  -6  11   2    4.46    0.27   0
  -5  -9   3    1.30    0.19   0
  -5  -9  12    0.13    0.16   0
  -5  -5  -9   20.85    0.26   0
  -5  -2 -12   10.46    0.23   0
  -5   9  -4   68.50    0.28   0
  -5  10   0   12.97    0.26   0
  -4  -8   1    2.86    0.17   0
  -4  -8   2   35.19    0.28   0
  -4  -8  13   40.05    0.17   0
  -4  -7  -3   61.65    0.35   0
  -4  -4  -9   70.30    0.30   0
  -4  -3 -10  282.71    0.54   0
  -4  -1 -11   14.62    0.19   0
  -4   4 -10   65.92    0.14   0
  -4   7  21    0.64    0.45   0
  -4   8  -4   51.72    0.22   0
  -4   8  19    1.19    0.42   0
  -4   9  15    6.26    0.42   0
  -3  -7   1  115.45    0.34   0
  -3  -5  -5    6.38    0.18   0
  -3  -3  -8   10.91    0.14   0
  -3   0  24   58.93    0.42   0
  -3   1  24   -0.23    0.34   0
  -3   2  24  186.44    0.73   0
  -3   6  20   21.47    0.46   0
  -3   7  18   43.47    0.48   0
  -3   8  14    3.26    0.25   0
  -3   8  15   71.27    0.51   0
  -3   9   7    2.30    0.23   0
  -2  -6   3    0.05    0.12   0
  -2  -4  -4    4.95    0.11   0
  -2  -4  18    0.20    0.13   0
  -2  -1  -7   75.02    0.23   0
  -2  -1  21    5.10    0.23   0
  -2   2  21    3.71    0.31   0
  -2   5  18   43.90    0.40   0
  -2   6  16    3.49    0.29   0
  -2   7  13    0.32    0.27   0
  -1  -4   1    8.23    0.10   0
  -1  -4  13    0.20    0.06   0
  -1  -1  -4  722.41    0.48   0
  -1   0  18   12.88    0.22   0
  -1   1  18    1.91    0.22   0
  -1   2  18  115.18    0.45   0
  -1   4  16    6.32    0.27   0
  -1   5  14   99.88    0.44   0
  -1   6   4    9.30    0.17   0
  -1   6   5   40.35    0.22   0
  -1   6   8   11.33    0.18   0
  -1   6   9    0.65    0.20   0
  -1   6  10   97.03    0.40   0
   0  -1  12   24.18    0.15   0
   0   0  13    0.36    0.13   0
   0   1  13    0.89    0.15   0
   0   2  12  157.66    0.37   0
   0   4   6    0.28    0.15   0
   0   4   7  376.80    0.57   0
 -10  -8 -10    5.07    0.36   0
 -10  -6 -13    1.07    0.40   0
 -10  -5 -14    1.23    0.41   0
 -10  -4 -15    1.13    0.39   0
 -10  -3 -16    7.46    0.31   0
 -10   0 -17    0.41    0.30   0
 -10   1 -17    1.51    0.29   0
  -9 -10  -3    0.18    0.39   0
  -9  -6 -12    7.74    0.40   0
  -9  -3 -15   14.13    0.35   0
  -9  -1 -16   15.11    0.34   0
  -9   3 -16    5.66    0.23   0
  -9   6 -14   11.72    0.21   0
  -8 -10  -1    3.84    0.35   0
  -8  -9  -5    3.19    0.37   0
  -8  -6 -11    2.11    0.29   0
  -8  -2 -15   13.94    0.32   0
  -8   5 -14    2.55    0.15   0
  -7 -10   2    8.83    0.34   0
  -7  -9  -3   -0.05    0.31   0
  -7  -8  -6   34.59    0.40   0
  -7  -6 -10    6.32    0.30   0
  -7  -2 -14   58.16    0.38   0
  -7   9  -8   24.42    0.15   0
  -7  11  -2    3.93    0.23   0
  -6  -9   0    9.23    0.26   0
  -6  -8  -4   19.84    0.31   0
  -6  -7  -7    2.53    0.20   0
  -6  -2 -13   51.02    0.34   0
  -6   5 -12   -0.12    0.09   0
  -6  11   1    7.95    0.27   0
  -5  -9   4   14.09    0.24   0
  -5  -9   5   29.61    0.32   0
  -5  -9  11    2.75    0.16   0
  -5  -8  -2    6.10    0.19   0
  -5  -7  -5   95.83    0.43   0
  -5  -4 -10    2.89    0.21   0
  -5  -3 -11   24.66    0.27   0
  -5   3 -12    9.62    0.14   0
  -5  10  -1    3.57    0.22   0
  -5  11   7   12.10    0.41   0
  -5  11   9    0.32    0.33   0
  -4  -8   3    0.25    0.16   0
  -4  -7  -2  152.45    0.45   0
  -4  -6  -5   53.42    0.32   0
  -4  -5  -7    2.28    0.18   0
  -4  -4  24   12.83    0.24   0
  -4  -3  25    4.71    0.25   0
  -4   2 -11    0.45    0.10   0
  -4   9  -1    0.14    0.17   0
  -4   9  16   53.49    0.48   0
  -4   9  17    0.14    0.44   0
  -4  10   4   16.82    0.30   0
  -4  10   5   14.66    0.28   0
  -4  10   6   -0.13    0.27   0
  -4  10   8    5.03    0.29   0
  -4  10   9   16.81    0.37   0
  -4  10  10   26.39    0.41   0
  -4  10  11    1.29    0.36   0
  -3  -7   2    0.19    0.14   0
  -3  -7  12   23.40    0.12   0
  -3  -6  -2   13.93    0.19   0
  -3  -1  -9    1.92    0.14   0
  -3  -1  24    0.23    0.25   0
  -3   3  24   32.06    0.44   0
  -3   4  -8  160.53    0.13   0
  -3   4  23   18.80    0.41   0
  -3   6  21   -0.05    0.41   0
  -3   7  -4  120.88    0.26   0
  -3   7  19   28.66    0.48   0
  -3   8  -1   81.13    0.28   0
  -3   8  16    1.06    0.34   0
  -3   9   4   43.83    0.32   0
  -3   9   5   53.50    0.35   0
  -3   9   6    3.84    0.23   0
  -3   9   8    0.94    0.19   0
  -3   9   9   37.99    0.37   0
  -3   9  10   44.31    0.42   0
  -3   9  11    0.17    0.32   0
  -2  -6   4  180.98    0.34   0
  -2  -5  -1   38.54    0.20   0
  -2  -3  -5    6.75    0.14   0
  -2  -2  -6    4.94    0.13   0
  -2   0  22   76.12    0.42   0
  -2   1  22    0.36    0.26   0
  -2   2  -7  104.99    0.16   0
  -2   2  22  129.01    0.54   0
  -2   3  21    8.99    0.32   0
  -2   4  20   71.33    0.43   0
  -2   6  -3  104.50    0.23   0
  -2   6  17   35.73    0.39   0
  -2   7   0   76.45    0.26   0
  -2   7  14   25.65    0.30   0
  -2   7  15   61.75    0.45   0
  -2   8   6    8.97    0.25   0
  -2   8   7   20.42    0.29   0
  -2   8   8   19.11    0.29   0
  -2   8   9    2.85    0.25   0
  -1  -2  -3  502.38    0.42   0
  -1  -2  17    6.47    0.14   0
  -1  -1  18    1.92    0.16   0
  -1   3  18    0.60    0.23   0
  -1   4  17    3.97    0.24   0
  -1   5  -1   77.50    0.21   0
  -1   5  15    0.09    0.25   0
  -1   6   2  386.99    0.53   0
  -1   6  11   15.57    0.22   0
  -1   6  12  160.04    0.51   0
   0  -2  11    0.40    0.09   0
   0  -1  13    0.57    0.13   0
   0   0  14   27.31    0.20   0
   0   1  14   48.08    0.25   0
   0   2  13   17.56    0.18   0
   0   3  12    0.38    0.17   0
   0   4   4   27.54    0.19   0
   0   4   8  577.99    0.71   0
   0   4   9  249.48    0.50   0
   0   4  10   23.57    0.23   0
 -11  -6 -13    0.90    0.45   0
 -11  -5 -14   20.59    0.53   0
 -11  -3 -16    0.12    0.39   0
 -11  -1 -17    1.87    0.37   0
 -11   0 -17    0.04    0.30   0
 -10  -9  -7   16.71    0.52   0
 -10  -8  -9    3.74    0.42   0
 -10  -7 -11    0.03    0.38   0
 -10  -2 -16   11.82    0.38   0
  -9 -10  -2    0.51    0.37   0
  -9  -9  -6    0.72    0.29   0
  -9  -8  -8    5.79    0.41   0
  -9  -7 -10   15.75    0.42   0
  -9  -5 -13    0.23    0.30   0
  -9  -4 -14    0.23    0.34   0
  -9   0 -16   27.25    0.32   0
  -9   1 -16   13.99    0.28   0
  -9   2 -16   14.08    0.26   0
  -8 -10   0   -0.23    0.33   0
  -8  -9  -4   35.12    0.45   0
  -8  -8  -7   17.42    0.41   0
  -8  -7  -9    5.37    0.32   0
  -8  -5 -12   51.61    0.43   0
  -8  -4 -13   20.78    0.37   0
  -8  -3 -14    0.58    0.29   0
  -8  -1 -15    0.25    0.25   0
  -8   3 -15    2.03    0.17   0
  -8   6 -13    3.35    0.13   0
  -7 -10   3   42.44    0.45   0
  -7  -9  -2   47.67    0.48   0
  -7  -7  -8    1.21    0.21   0
  -7  -5 -11    2.08    0.26   0
  -7  -4 -12    1.05    0.26   0
  -7  -3 -13   22.16    0.30   0
  -7  -1 -14  286.86    0.69   0
  -7   5 -13    0.50    0.11   0
  -6  -9   1   12.91    0.27   0
  -6  -7  -6   60.35    0.41   0
  -6  -6  -8   74.81    0.41   0
  -6  -5 -10  143.28    0.49   0
  -6  -4 -11   31.93    0.32   0
  -6  -3 -12   26.65    0.30   0
  -6  -1 -13   40.29    0.28   0
  -6  10  -4    3.02    0.19   0
  -6  11   0   15.13    0.30   0
  -5  -9   6   59.09    0.35   0
  -5  -9   7    7.22    0.21   0
  -5  -9   8   93.41    0.44   0
  -5  -9   9    3.94    0.19   0
  -5  -9  10    0.52    0.16   0
  -5  -8  -1   32.94    0.31   0
  -5  -7  -4    7.49    0.25   0
  -5  -1 -12   24.07    0.22   0
  -5  11   4   47.60    0.42   0
  -5  11   6    3.48    0.34   0
  -5  11  11   -0.34    0.39   0
  -4  -8   4   20.78    0.20   0
  -4  -8  12   97.38    0.25   0
  -4  -4  -8  127.19    0.39   0
  -4  -3  -9    4.84    0.18   0
  -4   9  -2   41.21    0.25   0
  -4  10   3    0.31    0.22   0
  -4  10  12   23.17    0.37   0
  -4  10  13   12.97    0.44   0
  -4  10  14    6.82    0.41   0
  -3  -7   4   72.68    0.27   0
  -3  -6  -1  103.60    0.32   0
  -3  -5  -4  136.33    0.37   0
  -3  -5  20   13.16    0.15   0
  -3  -4  -6    1.48    0.11   0
  -3  -3  -7    1.69    0.15   0
  -3  -3  23    1.76    0.23   0
  -3  -2  -8  410.11    0.56   0
  -3  -2  24  193.43    0.61   0
  -3   0  -9    0.55    0.11   0
  -3   0  25    0.63    0.30   0
  -3   1  25   26.46    0.43   0
  -3   2  -9   45.46    0.16   0
  -3   2  25    0.08    0.40   0
  -3   4  24  108.22    0.67   0
  -3   6  -6  133.83    0.18   0
  -3   6  22   20.91    0.47   0
  -3   7  20   21.28    0.47   0
  -3   8  17    7.49    0.39   0
  -3   9   3   48.01    0.31   0
  -3   9  12    0.18    0.24   0
  -3   9  13    6.54    0.36   0
  -2  -6  10    3.53    0.06   0
  -2  -5  16  106.06    0.17   0
  -2  -4  -3   50.51    0.22   0
  -2  -3  20   24.19    0.21   0
  -2  -1  22    0.08    0.26   0
  -2   0  -7    0.24    0.08   0
  -2   3  22    3.55    0.34   0
  -2   4  21    3.14    0.34   0
  -2   6  18   58.25    0.46   0
  -2   7  16   79.12    0.50   0
  -2   8   4    6.97    0.21   0
  -2   8   5  126.45    0.41   0
  -2   8  10   43.29    0.32   0
  -2   8  11   21.53    0.35   0
  -2   8  12   37.86    0.40   0
  -1  -4   2    1.21    0.08   0
  -1  -3  -1   58.27    0.17   0
  -1  -3  16  179.44    0.32   0
  -1   0  19    0.27    0.19   0
  -1   1  19    3.09    0.23   0
  -1   2  19   32.23    0.34   0
  -1   5  16   48.23    0.38   0
  -1   6  13   20.68    0.29   0
  -1   6  14    5.44    0.25   0
   0  -1   1    9.79    0.03   0
   0   1  15   29.54    0.23   0
   0   2  14    2.36    0.13   0
   0   3   1    0.47    0.08   0
   0   3  13    4.41    0.15   0
   0   4  11    0.43    0.17   0
   0   4  12   24.57    0.25   0
 -11  -7 -11    4.75    0.46   0
 -11  -2 -16   61.19    0.56   0
 -11   1 -17    2.30    0.32   0
 -10  -9  -6   11.34    0.48   0
 -10  -6 -12    8.30    0.42   0
 -10  -4 -14   -0.19    0.36   0
 -10  -3 -15   10.33    0.38   0
 -10   3 -16    8.23    0.32   0
  -9 -10  -1    8.38    0.37   0
  -9  -9  -5    8.43    0.45   0
  -9  -6 -11    1.23    0.32   0
  -9  -2 -15   11.62    0.34   0
  -9   4 -15    3.55    0.21   0
  -8 -10   1   20.49    0.40   0
  -8  -9  -3   13.32    0.36   0
  -8  -8  -6   35.11    0.46   0
  -8  -6 -10   15.13    0.34   0
  -8   0 -15   -0.11    0.22   0
  -8   1 -15   -0.07    0.20   0
  -8   2 -15   14.08    0.23   0
  -7 -10   4   15.11    0.36   0
  -7 -10   5   11.52    0.30   0
  -7  -9  -1    1.07    0.26   0
  -7  -8  -5   32.16    0.35   0
  -7  -7  -7    2.57    0.28   0
  -7  -6  -9   22.93    0.33   0
  -7   0 -14    0.37    0.20   0
  -7   3 -14   11.30    0.18   0
  -7  10  -6   17.59    0.19   0
  -7  11  -3   21.11    0.28   0
  -6  -8  -3   98.37    0.46   0
  -6   0 -13    0.05    0.17   0
  -6  11  -1    0.34    0.26   0
  -5  -8   0   31.11    0.30   0
  -5  -8  17    9.39    0.11   0
  -5  -6  -6    0.29    0.21   0
  -5  -4  -9    2.60    0.20   0
  -5  -2 -11   27.50    0.24   0
  -5   0 -12    5.76    0.16   0
  -5   1 -12   23.45    0.18   0
  -5  10  -2    2.24    0.20   0
  -5  11   3    0.19    0.25   0
  -4  -8   5   13.02    0.17   0
  -4  -8   6    0.26    0.15   0
  -4  -8  11    0.20    0.12   0
  -4  -7  -1   99.31    0.37   0
  -4  -6  21    0.89    0.10   0
  -4  -5  -6    0.73    0.17   0
  -4  -5  23   10.92    0.18   0
  -4  10   2   58.48    0.36   0
  -4  10  15    9.23    0.48   0
  -3  -7   5   60.49    0.25   0
  -3  -7  11    0.06    0.09   0
  -3  -1  25   27.24    0.34   0
  -3   1  -9    1.59    0.10   0
  -3   3  25    2.72    0.42   0
  -3   7  21    0.35    0.43   0
  -3   8  -2   11.96    0.15   0
  -3   8  18    0.12    0.35   0
  -3   9   2   19.18    0.23   0
  -3   9  14   49.13    0.42   0
  -3   9  15    0.78    0.39   0
  -2  -6   8    8.33    0.09   0
  -2  -6   9   23.57    0.10   0
  -2   0  23    3.33    0.31   0
  -2   1  -7   63.05    0.15   0
  -2   2  23   27.41    0.41   0
  -2   4  22  108.55    0.60   0
  -2   5  21    9.27    0.38   0
  -2   6  19    6.04    0.33   0
  -2   7  -1  117.69    0.30   0
  -2   7  17    4.56    0.33   0
  -2   8   2   20.67    0.24   0
  -2   8   3    4.27    0.19   0
  -2   8  13    4.29    0.32   0
  -2   8  14    0.08    0.32   0
  -1  -2  18  110.66    0.33   0
  -1   0  -4   14.83    0.08   0
  -1   1  20   10.24    0.27   0
  -1   2  20   18.70    0.30   0
  -1   3  19   17.15    0.29   0
  -1   4  18   79.06    0.40   0
  -1   5  17    0.07    0.29   0
  -1   6   1    0.15    0.11   0
  -1   6  15   44.79    0.39   0
  -1   7   5    2.90    0.19   0
  -1   7   6   71.45    0.35   0
  -1   7   9    8.85    0.25   0
  -1   7  10    3.32    0.26   0
  -1   7  11   18.27    0.27   0
   0  -2  12  146.04    0.25   0
   0  -1  14   45.87    0.20   0
   0   0  15    0.84    0.14   0
   0   2  15    2.82    0.19   0
   0   3  14   80.09    0.33   0
   0   3  15    0.39    0.21   0
   0   4   2  135.18    0.28   0
   0   4  13   63.46    0.33   0
   0   5   5   45.71    0.23   0
   0   5   7   37.94    0.24   0
   0   5   8  170.55    0.44   0
   0   5   9   18.63    0.22   0
   0   5  10    2.73    0.19   0
 -11  -6 -12    1.93    0.43   0
 -11  -5 -13    0.52    0.38   0
 -11  -3 -15    0.94    0.37   0
 -10 -10  -2    4.06    0.41   0
 -10  -9  -5    5.30    0.41   0
 -10  -8  -8    0.25    0.35   0
 -10  -7 -10    6.21    0.33   0
 -10  -2 -15    0.51    0.30   0
 -10   0 -16    7.12    0.31   0
 -10   1 -16   60.67    0.43   0
 -10   2 -16   11.71    0.27   0
 -10   5 -15    1.83    0.19   0
  -9 -10   0    9.55    0.37   0
  -9  -9  -4    8.25    0.41   0
  -9  -8  -7   16.50    0.42   0
  -9  -7  -9    7.10    0.36   0
  -9  -5 -12   28.63    0.42   0
  -9  -4 -13   20.09    0.38   0
  -9  -3 -14    2.20    0.29   0
  -9  -1 -15    0.55    0.27   0
  -8  -7  -8    8.96    0.32   0
  -8  -5 -11    0.85    0.29   0
  -8  -3 -13    1.27    0.27   0
  -7 -10   6   -0.11    0.23   0
  -7 -10   8    0.24    0.24   0
  -7 -10  11   -0.03    0.23   0
  -7 -10  12    5.84    0.26   0
  -7  -8  -4   18.45    0.33   0
  -7  -5 -10    6.45    0.26   0
  -7  -2 -13    0.27    0.23   0
  -7   1 -14  295.53    0.58   0
  -7   2 -14   48.65    0.27   0
  -6  -9   3   84.47    0.47   0
  -6  -8  -2    0.56    0.24   0
  -6  -7  -5   83.68    0.43   0
  -6  -6  -7   17.17    0.28   0
  -6  -5  -9    0.96    0.16   0
  -6  -4 -10    0.93    0.22   0
  -6  -3 -11    9.12    0.24   0
  -6  -2 -12  160.34    0.49   0
  -6   1 -13   40.61    0.23   0
  -5  -8   1   19.04    0.26   0
  -5  -7  -3  108.48    0.44   0
  -5  -3 -10   88.14    0.33   0
  -5   8  -7   20.83    0.12   0
  -5   9  -5    0.16    0.13   0
  -5  11   2    2.95    0.25   0
  -4  -8   8   63.19    0.29   0
  -4  -8   9    9.29    0.17   0
  -4  -8  10    0.49    0.13   0
  -4  -7   0   19.34    0.22   0
  -4  -6  -3  110.38    0.37   0
  -4  10   1   10.51    0.25   0
  -3  -7   6   14.16    0.15   0
  -3  -7   7    2.89    0.12   0
  -3  -7  10   57.16    0.20   0
  -3  -6   0   27.35    0.20   0
  -3  -5  -3    8.40    0.16   0
  -3  -4  -5    2.91    0.15   0
  -3   0  26    3.82    0.37   0
  -3   1  26   45.49    0.46   0
  -3   8  19    1.95    0.30   0
  -3   8  20    0.29    0.40   0
  -3   9  16   17.53    0.45   0
  -3   9  17    0.51    0.37   0
  -3  10   8    0.85    0.28   0
  -3  10   9    9.08    0.32   0
  -2  -4  -2  195.39    0.37   0
  -2  -4  19    9.87    0.14   0
  -2  -3  -4   91.85    0.24   0
  -2  -2  22  126.46    0.45   0
  -2  -1  -6   93.03    0.23   0
  -2  -1  23    0.16    0.27   0
  -2   5  -5    4.48    0.06   0
  -2   6  20    9.45    0.41   0
  -2   7  18   45.50    0.47   0
  -2   8  15    0.50    0.32   0
  -1  -3  17    4.67    0.15   0
  -1  -2  -2   36.07    0.13   0
  -1   0  20   83.62    0.37   0
  -1   3  20    7.70    0.31   0
  -1   4  19    1.36    0.28   0
  -1   5  18    0.35    0.31   0
  -1   6   0   18.09    0.15   0
  -1   6  16   25.87    0.36   0
  -1   7  12    0.17    0.25   0
  -1   7  13   58.79    0.41   0
   0  -2  13   18.75    0.14   0
   0  -1  15   31.28    0.21   0
   0   0  16  201.74    0.43   0
   0   1  16    0.60    0.18   0
   0   2  16    0.70    0.20   0
   0   3  16    0.26    0.22   0
   0   4  14   16.15    0.25   0
   0   5  12   91.86    0.39   0
 -11  -8  -8    2.30    0.44   0
 -11  -7 -10   10.69    0.45   0
 -11  -4 -14    6.50    0.34   0
 -11   0 -16  135.67    0.69   0
 -11   3 -16    0.00    0.26   0
 -10 -10  -1    3.93    0.40   0
 -10  -8  -7    1.44    0.38   0
 -10  -7  -9   12.48    0.41   0
 -10  -6 -11    3.38    0.36   0
 -10  -5 -12   14.86    0.41   0
 -10  -3 -14   18.68    0.39   0
 -10   6 -14    1.07    0.18   0
  -9 -10   1    0.58    0.33   0
  -9  -9  -3   -0.24    0.32   0
  -9  -8  -6   43.65    0.55   0
  -9  -6 -10   47.12    0.43   0
  -9   0 -15   -0.25    0.24   0
  -9   3 -15   13.93    0.26   0
  -8 -10   3    3.61    0.32   0
  -8  -9  -2    0.53    0.28   0
  -8  -7  -7    7.93    0.33   0
  -8  -6  -9    1.44    0.28   0
  -8  -4 -12   12.03    0.26   0
  -8  -1 -14   25.03    0.30   0
  -8   4 -14   44.84    0.24   0
  -7 -10   9    2.32    0.24   0
  -7 -10  10    2.38    0.24   0
  -7  -9   0    1.61    0.25   0
  -7  -7  -6   63.76    0.43   0
  -7  -6  -8   72.60    0.42   0
  -7  -4 -11    2.74    0.19   0
  -7  -1 -13    1.47    0.20   0
  -7  11  -4   33.29    0.30   0
  -6  -9   4    7.31    0.24   0
  -6  -9  15   -0.15    0.14   0
  -6  -8  -1   19.13    0.28   0
  -6   9  -7    1.24    0.11   0
  -6  11  -2    1.33    0.23   0
  -5  -8   2    0.80    0.19   0
  -5  -7  -2   91.73    0.40   0
  -5  -6  -5  101.77    0.40   0
  -5  -1 -11    5.29    0.17   0
  -5  11   1   14.35    0.26   0
  -4  -7   1    3.47    0.16   0
  -4  -3  -8    0.05    0.16   0
  -4   3 -10  287.83    0.34   0
  -4   9  -3   11.92    0.18   0
  -4  10   0    2.14    0.23   0
  -4  11   6    0.98    0.29   0
  -4  11   7   35.32    0.43   0
  -4  11   8   60.16    0.52   0
  -4  11   9    0.09    0.34   0
  -3  -7   8    9.26    0.12   0
  -3  -7   9   10.47    0.13   0
  -3  -3  -6  114.81    0.32   0
  -3  -3  24   29.40    0.30   0
  -3  -2  -7  203.64    0.39   0
  -3  -2  25    0.27    0.29   0
  -3   9   0   73.51    0.30   0
  -3   9  18    4.82    0.45   0
  -3  10   5   18.97    0.28   0
  -3  10   6    0.82    0.26   0
  -3  10   7   77.78    0.45   0
  -3  10  10   34.01    0.36   0
  -3  10  11    0.25    0.31   0
  -3  10  12   43.89    0.49   0
  -3  10  13    0.61    0.40   0
  -2  -2  -5    7.06    0.10   0
  -2   0  24   84.87    0.45   0
  -2   1  24   87.61    0.50   0
  -2   2  24   30.58    0.43   0
  -2   4  23   10.55    0.37   0
  -2   6  21    0.95    0.41   0
  -2   7  -2   45.46    0.19   0
  -2   7  19    8.29    0.36   0
  -2   8  16    2.67    0.26   0
  -2   8  17   69.47    0.55   0
  -2   9   6    0.55    0.25   0
  -2   9   7   69.49    0.41   0
  -2   9   8   88.51    0.46   0
  -2   9   9   11.98    0.32   0
  -2   9  10   58.52    0.44   0
  -2   9  11   -0.16    0.32   0
  -2   9  12   84.65    0.51   0
  -1  -4   3    0.62    0.06   0
  -1  -3   0  115.78    0.21   0
  -1  -2  19   30.88    0.25   0
  -1  -1  -3   65.44    0.15   0
  -1  -1  20    9.72    0.21   0
  -1   0  21    2.64    0.27   0
  -1   1  21    9.78    0.26   0
  -1   2  21   43.68    0.38   0
  -1   3  21    0.13    0.31   0
  -1   4  20   51.59    0.44   0
  -1   5  -2   64.01    0.17   0
  -1   5  19    1.33    0.34   0
  -1   6  17   19.60    0.36   0
  -1   7  14  107.12    0.52   0
  -1   7  15    0.91    0.27   0
   0   1  17    0.29    0.19   0
   0   2  17  120.36    0.43   0
   0   3   0    0.52    0.06   0
   0   4  15    2.02    0.18   0
   0   5   3   28.73    0.19   0
   0   5  13    0.63    0.21   0
   0   5  14   17.57    0.26   0
   0   6   8  134.44    0.41   0
   0   6   9  112.42    0.40   0
 -11  -6 -11    0.94    0.39   0
 -11  -2 -15    9.44    0.38   0
 -11   2 -16   65.07    0.43   0
 -10 -10   0    0.15    0.38   0
 -10  -9  -4   11.45    0.48   0
 -10  -4 -13    0.39    0.25   0
 -10  -1 -15   18.47    0.36   0
 -10   4 -15    1.27    0.23   0
  -9  -7  -8   11.06    0.29   0
  -9  -5 -11    7.67    0.34   0
  -9  -4 -12    5.20    0.32   0
  -9  -3 -13    1.34    0.29   0
  -9  -2 -14    0.76    0.22   0
  -9   2 -15   13.03    0.25   0
  -9   5 -14    2.83    0.17   0
  -8 -10   4   21.07    0.42   0
  -8 -10   5    7.99    0.31   0
  -8  -8  -4    9.45    0.33   0
  -8  -5 -10    2.11    0.27   0
  -8  -2 -13    0.16    0.24   0
  -8   0 -14  149.87    0.49   0
  -8   3 -14    0.96    0.20   0
  -7  -8  -3   50.35    0.36   0
  -7   4 -13    7.70    0.16   0
  -6  -9   5   23.43    0.30   0
  -6  -9  14    2.04    0.18   0
  -6  -7  -4   40.14    0.29   0
  -6  -6  -6   15.91    0.26   0
  -6  -5  -8   21.84    0.26   0
  -6   4 -12   37.20    0.18   0
  -6  10  -5   47.93    0.25   0
  -5  -8   3   32.34    0.25   0
  -5  -4  -8  135.21    0.42   0
  -5  -3  -9   59.04    0.30   0
  -5  -2 -10   42.50    0.26   0
  -5   0 -11   -0.05    0.15   0
  -5  10  -3    0.09    0.14   0
  -5  11   0   20.05    0.29   0
  -4   1 -10   18.31    0.15   0
  -4   2 -10  260.14    0.37   0
  -4   7  -7   22.00    0.09   0
  -4  11   4    3.72    0.28   0
  -4  11   5   11.04    0.32   0
  -3  -6   1    6.30    0.14   0
  -3  -5  -2    5.60    0.15   0
  -3  -4  -4   61.79    0.26   0
  -3  -4  23   15.99    0.22   0
  -3   7  -5   47.39    0.15   0
  -3   8  -3    1.21    0.11   0
  -3  10   4   10.33    0.25   0
  -3  10  14   30.68    0.47   0
  -3  10  15    7.49    0.47   0
  -2  -2  23   28.62    0.33   0
  -2  -1  24   90.35    0.46   0
  -2   2  25    0.23    0.33   0
  -2   6  -4    0.23    0.08   0
  -2   6  22   30.91    0.50   0
  -2   7  20   19.25    0.43   0
  -2   8   0   89.60    0.29   0
  -2   8  18    2.15    0.39   0
  -2   9   4   10.37    0.24   0
  -2   9   5    3.76    0.22   0
  -2   9  13    3.80    0.32   0
  -2   9  14   61.32    0.52   0
  -1   1  -4  653.48    0.29   0
  -1   1  22   14.20    0.32   0
  -1   2  22  131.99    0.56   0
  -1   4  21    8.92    0.35   0
  -1   5  20    6.26    0.36   0
  -1   6  18   24.36    0.37   0
  -1   7  16   63.21    0.47   0
  -1   8   7   26.62    0.30   0
  -1   8   8   13.92    0.28   0
  -1   8   9    0.41    0.25   0
  -1   8  10   39.00    0.36   0
  -1   8  11    5.48    0.30   0
  -1   8  12    9.20    0.30   0
   0  -2  14    2.57    0.12   0
   0  -1  16    1.29    0.13   0
   0   0  17    3.53    0.21   0
   0   1  18   11.10    0.23   0
   0   4  16   18.45    0.23   0
   0   5  15    1.93    0.25   0
   0   6   5    1.65    0.16   0
   0   6   6   10.92    0.20   0
   0   6   7    0.10    0.12   0
   0   6  10  158.96    0.46   0
   0   6  11    1.97    0.23   0
   0   6  12   13.83    0.26   0
   1   1   8   82.65    0.24   0
   1   1   9   19.81    0.17   0
   1   2   7   10.64    0.15   0
   1   2   8  217.56    0.39   0
   1   2   9   10.56    0.16   0
   1   2  10   14.99    0.17   0
 -12  -6 -11    3.16    0.44   0
 -12  -3 -14    2.27    0.37   0
 -11  -9  -4   -0.35    0.43   0
 -11  -8  -7    6.22    0.36   0
 -11  -7  -9    2.48    0.31   0
 -11  -5 -12    0.79    0.29   0
 -11  -4 -13    1.17    0.39   0
 -11  -3 -14    1.59    0.27   0
 -11  -1 -15    3.19    0.35   0
 -10 -10   1    6.75    0.42   0
 -10  -9  -3    4.96    0.40   0
 -10  -8  -6   12.04    0.45   0
 -10  -7  -8    2.97    0.37   0
 -10  -6 -10    4.47    0.28   0
 -10  -5 -11    0.47    0.31   0
 -10  -2 -14    0.78    0.31   0
 -10   0 -15   -0.42    0.27   0
  -9 -10   3   10.42    0.41   0
  -9  -9  -2   16.44    0.42   0
  -9  -8  -5   27.77    0.43   0
  -9  -7  -7   24.12    0.41   0
  -9  -1 -14    2.80    0.26   0
  -8 -10   6    8.47    0.31   0
  -8  -7  -6   19.18    0.34   0
  -8  -6  -8   19.33    0.32   0
  -8  -4 -11    6.02    0.29   0
  -8  -3 -12    1.23    0.26   0
  -8   1 -14   23.74    0.25   0
  -8   2 -14    9.90    0.21   0
  -8  10  -8    5.90    0.13   0
  -7  -9   2    2.63    0.24   0
  -7  -8  -2    4.07    0.27   0
  -7  -7  -5   17.77    0.30   0
  -7  -6  -7    4.87    0.25   0
  -7  -4 -10    6.49    0.25   0
  -7  -3 -11    1.99    0.23   0
  -7  -2 -12   56.37    0.35   0
  -7   0 -13    0.16    0.20   0
  -6  -9   6    3.75    0.23   0
  -6  -9   7    6.78    0.25   0
  -6  -9  13   19.72    0.24   0
  -6  -8   0   17.25    0.28   0
  -6  -7  -3   37.64    0.32   0
  -6  -4  -9   25.17    0.23   0
  -6  -3 -10    6.66    0.22   0
  -6  -2 -11   53.23    0.31   0
  -6   0 -12   28.58    0.23   0
  -5  -8   4    4.86    0.19   0
  -5  -7  -1    6.71    0.22   0
  -5  -5  -6   17.25    0.23   0
  -5   3 -11   22.60    0.15   0
  -4  -7   2   50.62    0.26   0
  -4  -5  -4   75.43    0.31   0
  -4  -4  -6   11.78    0.14   0
  -4  -1  -9   34.90    0.21   0
  -4  10  -1    8.86    0.20   0
  -4  11   3    0.84    0.25   0
  -3  -6   2    7.38    0.14   0
  -3  -5  21    0.79    0.12   0
  -3   9  -1    1.54    0.15   0
  -3  10   3   13.45    0.24   0
  -2  -5  17    2.07    0.08   0
  -2  -4  -1    4.62    0.13   0
  -2  -4  20   73.74    0.26   0
  -2  -3  -3    0.46    0.10   0
  -2  -3  22    3.78    0.18   0
  -2   0  -6  327.80    0.35   0
  -2   0  25    2.72    0.30   0
  -2   1  25    2.34    0.32   0
  -2   7  21    2.42    0.39   0
  -2   8  19   25.88    0.49   0
  -2   9   3    3.60    0.20   0
  -2   9  15    8.28    0.31   0
  -2   9  16   49.29    0.52   0
  -1  -4   4   61.48    0.15   0
  -1  -3  18    0.77    0.14   0
  -1  -2  20   18.49    0.24   0
  -1  -1  21   10.29    0.23   0
  -1   0  22   73.32    0.39   0
  -1   3  22   47.48    0.44   0
  -1   4  22   26.09    0.40   0
  -1   5  21    9.20    0.38   0
  -1   6  -1   49.90    0.19   0
  -1   6  19   13.50    0.30   0
  -1   7   1   55.18    0.24   0
  -1   7  17   58.87    0.45   0
  -1   8  13    2.76    0.31   0
  -1   8  14   11.23    0.34   0
   0  -1  17    0.37    0.15   0
   0   0  18   16.76    0.21   0
   0   2  19   65.97    0.37   0
   0   4  18    7.70    0.28   0
   0   5  16   19.54    0.31   0
   0   6   4   48.08    0.25   0
   0   6  13    0.27    0.16   0
   0   6  14    1.27    0.24   0
   1   1   6  230.98    0.33   0
   1   1   7   20.54    0.12   0
   1   1  10    4.76    0.11   0
   1   1  11    4.11    0.14   0
   1   2   6    6.04    0.12   0
   1   2  11   66.75    0.27   0
   1   2  12  189.13    0.43   0
   1   3   6    0.84    0.11   0
   1   3   8   95.34    0.29   0
   1   3   9   26.53    0.20   0
   1   3  10    6.25    0.17   0
   1   3  11   32.84    0.24   0
 -12  -7  -9   -0.02    0.29   0
 -12  -4 -13    7.75    0.42   0
 -12  -1 -15    5.38    0.41   0
 -11  -9  -3    0.36    0.38   0
 -11  -8  -6    4.02    0.42   0
 -11  -7  -8    4.89    0.39   0
 -11   0 -15   -0.23    0.29   0
 -11   4 -15    0.01    0.27   0
 -10  -9  -2   17.45    0.45   0
 -10  -4 -12    0.07    0.33   0
 -10  -3 -13    1.88    0.31   0
 -10   1 -15   14.00    0.32   0
 -10   2 -15    0.54    0.24   0
  -9 -10   4    4.46    0.36   0
  -9  -9  -1    1.84    0.33   0
  -9  -8  -4    3.05    0.34   0
  -9  -5 -10   40.31    0.40   0
  -9   0 -14   -0.07    0.21   0
  -8 -10   9    2.02    0.30   0
  -8  -8  -3   13.20    0.34   0
  -8  -1 -13    1.92    0.24   0
  -8   5 -13    0.49    0.13   0
  -7  -9   3    8.18    0.26   0
  -7  -8  -1   10.76    0.28   0
  -7  -7  -4   35.04    0.32   0
  -7  -5  -8   15.76    0.25   0
  -7   1 -13    1.34    0.17   0
  -7  10  -7   16.29    0.17   0
  -6  -9   8   85.06    0.43   0
  -6  -9   9    1.01    0.20   0
  -6  -9  10   54.61    0.39   0
  -6  -9  11    8.20    0.21   0
  -6  -9  12    2.48    0.18   0
  -6  -8   1   55.36    0.37   0
  -6  -6  -5   42.48    0.31   0
  -6  -5  -7   77.31    0.37   0
  -6   1 -12    3.67    0.15   0
  -6   2 -12  161.74    0.37   0
  -6   3 -12   26.56    0.18   0
  -6  11  -3   12.85    0.21   0
  -5  -8  16   48.61    0.19   0
  -5  -4  -7  104.87    0.36   0
  -5  -1 -10   63.27    0.26   0
  -5   1 -11    4.77    0.13   0
  -5   2 -11   26.59    0.18   0
  -5  11  -1    4.92    0.23   0
  -4  -7   3    0.68    0.14   0
  -4  -6  -1   24.69    0.21   0
  -4  -3  -7   -0.01    0.10   0
  -4  -2  -8  134.86    0.35   0
  -4   9  -4   95.96    0.29   0
  -4  11   2   16.01    0.27   0
  -3  -5  -1    0.85    0.13   0
  -3  -3  -5    3.30    0.13   0
  -3  -3  25    2.87    0.22   0
  -3  10   2    6.97    0.22   0
  -3  11   8   40.46    0.44   0
  -3  11   9   35.00    0.44   0
  -3  11  12    0.57    0.39   0
  -2  -2  -4  112.19    0.24   0
  -2   7  -3    6.25    0.13   0
  -2   8  -1   29.57    0.19   0
  -2   8  20    2.36    0.42   0
  -2   9   2   52.41    0.29   0
  -2   9  17    3.61    0.38   0
  -2   9  18   18.81    0.47   0
  -2  10   8   13.22    0.33   0
  -2  10   9   22.75    0.38   0
  -2  10  10    0.26    0.32   0
  -2  10  11    0.50    0.35   0
  -1   1  23    3.42    0.30   0
  -1   2  -4   41.79    0.04   0
  -1   2  23    0.57    0.34   0
  -1   3  23    0.63    0.33   0
  -1   5  22    9.93    0.40   0
  -1   6  20    2.51    0.30   0
  -1   7  18   10.81    0.30   0
  -1   7  19   10.93    0.38   0
  -1   8   3   23.04    0.23   0
  -1   8   4   87.68    0.33   0
  -1   8  15    5.00    0.30   0
  -1   8  16   12.95    0.38   0
   0  -2  15    2.36    0.11   0
   0   1  19   16.28    0.26   0
   0   3  19    3.64    0.25   0
   0   4  19   50.84    0.40   0
   0   5  17   22.81    0.29   0
   0   5  18    1.74    0.29   0
   0   6   3   -0.08    0.14   0
   0   6  15   44.76    0.37   0
   0   6  16    0.84    0.27   0
   0   7   7    2.41    0.23   0
   0   7   8   65.97    0.36   0
   0   7   9    1.28    0.23   0
   0   7  10    4.61    0.25   0
   0   7  11   32.10    0.32   0
   0   7  12   25.02    0.31   0
   1   0   8  199.90    0.30   0
   1   0   9    0.12    0.10   0
   1   0  10   18.08    0.14   0
   1   0  11   -0.19    0.11   0
   1   1  13   92.81    0.30   0
   1   2  13   12.41    0.20   0
   1   2  14    4.59    0.18   0
   1   3  12   34.18    0.21   0
   1   3  13   48.33    0.29   0
   1   4  10   32.59    0.24   0
   1   4  11  121.54    0.39   0
   1   4  12   54.63    0.30   0
 -12  -7  -8    4.27    0.44   0
 -12  -6 -10    0.39    0.37   0
 -12  -2 -14   10.21    0.38   0
 -12   0 -15    0.08    0.31   0
 -11  -5 -11    0.45    0.35   0
 -11  -4 -12    2.65    0.37   0
 -11  -3 -13    0.67    0.34   0
 -11   1 -15    3.25    0.29   0
 -10 -10   3    0.93    0.37   0
 -10  -7  -7   30.30    0.46   0
 -10  -6  -9   22.53    0.36   0
 -10  -1 -14   14.66    0.33   0
  -9 -10   5    1.63    0.31   0
  -9  -9   0    0.23    0.30   0
  -9  -7  -6    0.18    0.30   0
  -9  -6  -8   41.15    0.40   0
  -9  -4 -11   16.79    0.33   0
  -9  -3 -12    7.19    0.31   0
  -9   4 -14    0.28    0.16   0
  -9   6 -13   14.58    0.21   0
  -8 -10  10   -0.04    0.24   0
  -8 -10  11    7.27    0.27   0
  -8  -9   2    3.72    0.30   0
  -8  -6  -7    0.63    0.26   0
  -8  -4 -10  108.00    0.47   0
  -8  -2 -12   20.75    0.28   0
  -7  -9   4   15.36    0.29   0
  -7  -6  -6  106.07    0.46   0
  -7  -1 -12   32.28    0.28   0
  -7  11  -5   12.67    0.22   0
  -6  -8   2   68.12    0.41   0
  -6  -7  -2   36.19    0.32   0
  -6  -4  -8  103.04    0.39   0
  -6  -1 -11   79.14    0.33   0
  -5  -8   6    8.26    0.19   0
  -5  -7   0   43.15    0.26   0
  -5  -6  -3   40.04    0.25   0
  -5  -5  -5   21.82    0.23   0
  -5  -3  -8   -0.12    0.16   0
  -5   5 -10   10.98    0.09   0
  -5   9  -6   12.89    0.13   0
  -5  10  -4    2.95    0.15   0
  -5  12   2   57.77    0.46   0
  -4  -7   4  172.32    0.42   0
  -4  -6  22    2.43    0.11   0
  -4  -4  -5    3.17    0.15   0
  -4   0  -9    0.12    0.12   0
  -4  10  -2    0.14    0.18   0
  -4  11   1    5.07    0.26   0
  -3  -4  -3    0.39    0.14   0
  -3  -4  24   85.04    0.34   0
  -3  -2  -6   26.35    0.18   0
  -3  -1  -7   30.68    0.15   0
  -3   1  -8   71.18    0.19   0
  -3   3  -8   10.06    0.08   0
  -3   8  -4    0.45    0.12   0
  -3   9  -2   50.22    0.25   0
  -3  10   1    0.62    0.20   0
  -3  11   5   71.83    0.47   0
  -3  11   6   28.89    0.40   0
  -3  11   7   -0.10    0.29   0
  -2  -4   0   34.88    0.16   0
  -2  -2  24   27.79    0.30   0
  -2  -1  -5    4.64    0.08   0
  -2  -1  25    3.30    0.28   0
  -2   0  26    6.58    0.34   0
  -2   9   1    8.51    0.18   0
  -2  10   5   58.99    0.39   0
  -2  10   6    2.62    0.26   0
  -2  10   7   38.02    0.36   0
  -2  10  15    2.21    0.42   0
  -1  -3  19   17.75    0.18   0
  -1  -2  -1 1435.39    0.61   0
  -1  -2  21   43.06    0.29   0
  -1  -1  22   14.83    0.25   0
  -1   0  23    2.13    0.25   0
  -1   2  24    0.42    0.30   0
  -1   3  24   35.18    0.42   0
  -1   4  23    4.41    0.34   0
  -1   5  -3    7.58    0.09   0
  -1   6  21    0.47    0.30   0
  -1   7   0   24.14    0.17   0
  -1   7  20    0.87    0.38   0
  -1   8   2    0.51    0.18   0
  -1   9   7   36.02    0.34   0
  -1   9   8   35.84    0.34   0
  -1   9   9   34.91    0.37   0
  -1   9  10    8.74    0.31   0
  -1   9  11    0.07    0.31   0
  -1   9  12   34.85    0.42   0
   0  -3   9    7.53    0.05   0
   0  -3  11    2.39    0.06   0
   0  -2  16    0.85    0.13   0
   0  -1  18   11.33    0.17   0
   0   0  19    0.51    0.18   0
   0   1  20    0.42    0.24   0
   0   2  20   28.20    0.33   0
   0   3  -1    0.65    0.05   0
   0   3  20    2.18    0.27   0
   0   4  20    7.17    0.31   0
   0   5  19    5.53    0.31   0
   0   6   2    0.83    0.13   0
   0   6  17   73.42    0.48   0
   0   7   5   31.56    0.25   0
   0   7   6  135.65    0.40   0
   0   7  13    7.58    0.22   0
   0   7  14   19.86    0.33   0
   1   0   7   -0.02    0.07   0
   1   0  12  143.10    0.32   0
   1   1  14   13.80    0.20   0
   1   2   4   47.11    0.16   0
   1   2  15   26.50    0.25   0
   1   3  14   25.20    0.26   0
   1   3  15    2.09    0.22   0
   1   4  13    0.25    0.20   0
   1   4  14   46.02    0.31   0
   1   5   8   10.60    0.19   0
   1   5   9    6.88    0.19   0
   1   5  10    5.56    0.19   0
   1   5  11    2.48    0.19   0
 -12  -5 -11    7.09    0.35   0
 -12  -3 -13    7.30    0.41   0
 -12   1 -15    5.26    0.34   0
 -11  -9  -2   12.93    0.48   0
 -11  -8  -5    0.12    0.35   0
 -11  -7  -7    0.84    0.36   0
 -11  -1 -14   22.00    0.37   0
 -10 -10   4    0.94    0.36   0
 -10  -9  -1    2.64    0.36   0
 -10  -8  -4   33.99    0.49   0
 -10  -4 -11    0.84    0.32   0
 -10  -3 -12   54.45    0.55   0
 -10  -2 -13    8.28    0.33   0
 -10   0 -14   60.62    0.40   0
  -9 -10   6   23.35    0.39   0
  -9 -10   7    2.35    0.30   0
  -9  -5  -9   18.27    0.33   0
  -9  -1 -13    0.23    0.25   0
  -9   2 -14    0.91    0.21   0
  -9   3 -14    1.85    0.19   0
  -8   0 -13    0.36    0.20   0
  -7  -9   5   49.63    0.41   0
  -7  -9   6   -0.07    0.25   0
  -7  -8   0    9.14    0.27   0
  -7  -3 -10  113.51    0.45   0
  -7  -2 -11    0.20    0.21   0
  -7   0 -12  169.89    0.45   0
  -7   5 -12   13.34    0.13   0
  -6  -6  -4    1.20    0.23   0
  -6  -5  -6   96.03    0.38   0
  -6  -2 -10   27.95    0.25   0
  -6   5 -11    1.67    0.09   0
  -6  10  -6   28.25    0.20   0
  -6  11  -4   13.71    0.22   0
  -5  -8   7    4.62    0.18   0
  -5  -8  15   15.58    0.18   0
  -5  -7   1    4.72    0.19   0
  -5  11  -2   16.13    0.25   0
  -5  12   1    1.92    0.29   0
  -4  -6   0  229.95    0.46   0
  -4  12   5    7.45    0.33   0
  -3  -5   0   47.20    0.21   0
  -3   2  -8  356.45    0.34   0
  -3  10   0   78.93    0.37   0
  -3  11   4    3.32    0.27   0
  -2  -4  21    3.46    0.15   0
  -2  -3  -2    7.31    0.12   0
  -2  -3  23    2.95    0.21   0
  -2   1  -6   91.33    0.16   0
  -2   8  -2    5.97    0.14   0
  -2  10   4    9.22    0.25   0
  -1   1  24   45.83    0.42   0
  -1   5  23    8.15    0.33   0
  -1   6  22   18.55    0.38   0
  -1   7  21    0.08    0.42   0
  -1   8  18    7.97    0.29   0
  -1   8  19   21.35    0.47   0
  -1   9   5    1.78    0.24   0
  -1   9   6   89.49    0.42   0
  -1   9  14   10.39    0.36   0
  -1   9  15    3.94    0.39   0
   0  -1  19   16.42    0.22   0
   0   0  20   30.11    0.26   0
   0   1  21   20.78    0.27   0
   0   2  21   13.96    0.31   0
   0   3  21   30.40    0.38   0
   0   4  21    1.08    0.29   0
   0   5  20   31.00    0.42   0
   0   6  18    1.84    0.32   0
   0   7  15   75.05    0.42   0
   0   7  16   18.64    0.36   0
   0   8  10   12.46    0.27   0
   0   8  11    0.46    0.26   0
   1   0   6   61.64    0.15   0
   1   0  13    0.07    0.12   0
   1   0  14    5.49    0.14   0
   1   1   4  674.21    0.46   0
   1   1  15   47.62    0.27   0
   1   2  16   -0.13    0.20   0
   1   3  16   11.20    0.25   0
   1   4   4   75.08    0.25   0
   1   4  15    2.71    0.24   0
   1   5  12   14.92    0.20   0
   1   5  13   13.15    0.25   0
   1   5  14   12.51    0.24   0
 -12  -8  -5    0.22    0.39   0
 -12  -7  -7   -0.19    0.38   0
 -12  -6  -9    5.14    0.39   0
 -12  -1 -14    2.88    0.35   0
 -12   2 -15   -0.17    0.29   0
 -11  -9  -1   21.69    0.48   0
 -11  -8  -4   12.73    0.46   0
 -11  -4 -11    4.29    0.33   0
 -11  -3 -12   22.98    0.42   0
 -11  -2 -13    4.74    0.33   0
 -11   0 -14   13.69    0.34   0
 -10 -10   5    7.27    0.37   0
 -10  -8  -3    1.64    0.32   0
 -10  -7  -6    1.49    0.23   0
 -10  -6  -8   40.77    0.43   0
 -10   4 -14    0.00    0.21   0
  -9  -9   1   13.24    0.36   0
  -9  -8  -2    0.15    0.27   0
  -9  -6  -7   78.01    0.49   0
  -9  -4 -10    0.14    0.26   0
  -9  -3 -11    4.41    0.26   0
  -9  -2 -12    5.98    0.26   0
  -8  -9   3   23.89    0.35   0
  -8  -7  -4   94.54    0.50   0
  -8  -6  -6  146.32    0.52   0
  -8  -5  -8   35.84    0.30   0
  -8  -1 -12   92.58    0.40   0
  -8   1 -13    1.17    0.18   0
  -8   2 -13    0.16    0.18   0
  -8   3 -13    1.13    0.18   0
  -7  -9   7    0.72    0.24   0
  -7  -8   1   34.79    0.33   0
  -7  -5  -7   18.24    0.22   0
  -6  -8   3   10.45    0.22   0
  -6  -7  -1  146.01    0.48   0
  -6   0 -11    0.17    0.14   0
  -5  -8   8    1.29    0.14   0
  -5  -8   9    0.47    0.16   0
  -5  -8  14   17.23    0.19   0
  -5  -6  -2    1.37    0.13   0
  -5  -5  -4   15.86    0.21   0
  -5  -4  -6    2.19    0.17   0
  -5   0 -10   18.91    0.17   0
  -4  -7   5    5.67    0.14   0
  -4  -2  -7    1.97    0.13   0
  -4  -1  -8   22.56    0.18   0
  -4  11   0    1.30    0.22   0
  -4  12   4   -0.02    0.29   0
  -3  -6   4   14.51    0.14   0
  -3  -5  22    0.46    0.12   0
  -3  -3  -4   36.40    0.19   0
  -3  11   3    0.11    0.25   0
  -2  -5  18   37.13    0.13   0
  -2  -2  25    0.13    0.28   0
  -2   9   0   16.53    0.19   0
  -2  10   3    1.13    0.21   0
  -2  11  10    0.44    0.32   0
  -2  11  11    1.33    0.34   0
  -1  -3  20    7.06    0.16   0
  -1  -2  22  126.63    0.44   0
  -1  -1  23    2.93    0.24   0
  -1   0  24   66.18    0.41   0
  -1   1  25    3.56    0.34   0
  -1   2  25   11.26    0.40   0
  -1   3  25   19.23    0.43   0
  -1   7  -1    0.74    0.11   0
  -1   8   1    8.02    0.17   0
  -1   8  20   25.73    0.52   0
  -1   9   4    8.53    0.24   0
  -1   9  16   43.84    0.44   0
  -1   9  17   12.74    0.44   0
   0  -2  17  107.06    0.29   0
   0   0  21    1.10    0.26   0
   0   2  22   20.12    0.34   0
   0   5  21    1.08    0.36   0
   0   6   1   15.20    0.15   0
   0   6  19    0.22    0.24   0
   0   6  20   20.70    0.41   0
   0   7  17    8.03    0.32   0
   0   7  18    0.47    0.32   0
   0   8   7   11.40    0.26   0
   0   8  12   45.85    0.35   0
   0   8  13    0.68    0.31   0
   0   8  14   -0.19    0.30   0
   1  -1  10    5.24    0.11   0
   1   0  15   -0.10    0.13   0
   1   1  16    0.10    0.17   0
   1   2  17   16.95    0.25   0
   1   3   3    0.43    0.10   0
   1   3  17   14.80    0.27   0
   1   4  16   28.80    0.26   0
   1   4  17   50.47    0.36   0
   1   5  15   60.32    0.38   0
   1   6  10   10.68    0.24   0
   1   6  13    7.26    0.23   0
 -13  -5 -10    4.35    0.44   0
 -12  -8  -4    0.35    0.41   0
 -12  -5 -10   13.97    0.40   0
 -12  -3 -12   -0.29    0.35   0
 -12  -2 -13    1.77    0.34   0
 -12   0 -14   10.91    0.38   0
 -11  -9   0    6.91    0.37   0
 -11  -7  -6    7.01    0.38   0
 -11  -6  -8   27.36    0.48   0
 -10 -10   6   16.61    0.40   0
 -10  -7  -5    2.06    0.30   0
 -10  -6  -7    8.42    0.32   0
 -10  -1 -13    3.49    0.27   0
 -10   3 -14   17.26    0.26   0
  -9 -10  10    0.59    0.26   0
  -9  -9   2   14.64    0.37   0
  -9  -5  -8   16.22    0.32   0
  -9   0 -13   -0.37    0.23   0
  -9   5 -13    0.01    0.15   0
  -8  -9   4   31.32    0.40   0
  -8  -8   0    0.97    0.25   0
  -8  -3 -10   49.80    0.34   0
  -8  -2 -11   55.35    0.35   0
  -7  -9   8   12.06    0.28   0
  -7  -9  16   -0.02    0.17   0
  -7  -4  -8   60.86    0.35   0
  -7  -1 -11   15.92    0.23   0
  -7   1 -12   31.01    0.22   0
  -7   4 -12    1.35    0.14   0
  -6  -8   4    1.16    0.18   0
  -6  -6  -3   78.83    0.36   0
  -6  -5  -5   67.09    0.33   0
  -6  -1 -10   37.07    0.25   0
  -6   1 -11   70.95    0.27   0
  -5  -8  10   64.80    0.33   0
  -5  -8  11   10.06    0.17   0
  -5  -8  12   10.38    0.17   0
  -5  -8  13    7.82    0.15   0
  -5  -7   2    4.88    0.17   0
  -5  -3  -7   16.30    0.19   0
  -5  -2  -8   81.19    0.29   0
  -5  -1  -9   97.59    0.31   0
  -4  -7   6  104.21    0.30   0
  -4  -5  -2  220.62    0.42   0
  -4   4  -9   67.95    0.14   0
  -4   9  -5    1.61    0.12   0
  -4  10  -3   19.79    0.20   0
  -4  12   3    1.43    0.29   0
  -3  -4  -2   52.55    0.22   0
  -3   0  -7    0.19    0.09   0
  -3   9  -3   14.57    0.18   0
  -3  10  -1   19.50    0.26   0
  -3  11   2    1.66    0.26   0
  -2  -4   1    7.52    0.10   0
  -2  -3  24  106.59    0.41   0
  -2   2  -6    4.82    0.06   0
  -2  10   2   14.44    0.28   0
  -2  11   7   94.57    0.53   0
  -2  11   9    0.65    0.29   0
  -2  11  12    0.00    0.29   0
  -1  -4  17    4.07    0.11   0
  -1  -1  -2  551.30    0.34   0
  -1  -1  24   46.26    0.36   0
  -1   0  -3   -0.07    0.05   0
  -1   9   3   20.06    0.25   0
  -1   9  18   14.21    0.45   0
  -1  10   8   15.00    0.34   0
  -1  10   9   11.12    0.34   0
  -1  10  10    8.58    0.35   0
  -1  10  11    7.59    0.37   0
  -1  10  12   21.96    0.44   0
  -1  10  13    0.52    0.39   0
   0  -1  20    0.58    0.18   0
   0   1  22    0.31    0.27   0
   0   3  23   10.58    0.33   0
   0   4  22    5.11    0.26   0
   0   5  22   27.96    0.46   0
   0   6  21   11.46    0.41   0
   0   7   2   48.69    0.23   0
   0   7  19   90.38    0.60   0
   0   8   5   14.64    0.24   0
   0   8  15   15.51    0.29   0
   0   8  16   25.61    0.42   0
   1  -1   8   81.65    0.18   0
   1  -1   9   18.46    0.11   0
   1  -1  12    7.67    0.11   0
   1  -1  13   91.46    0.26   0
   1   0   5    0.01    0.06   0
   1   0  16    5.69    0.16   0
   1   1  17   13.88    0.21   0
   1   2  18   27.65    0.29   0
   1   3  18   21.02    0.29   0
   1   4  18    1.29    0.27   0
   1   5   4    4.70    0.14   0
   1   5  16    0.78    0.19   0
   1   5  17   20.04    0.34   0
   1   6   6    3.99    0.18   0
   1   6   7    4.24    0.15   0
   1   6  14    2.28    0.24   0
   1   6  15   22.86    0.33   0
 -13  -7  -6    0.36    0.40   0
 -13  -4 -11   16.79    0.53   0
 -13  -3 -12    0.94    0.41   0
 -13  -2 -13    0.20    0.27   0
 -12  -7  -6    2.16    0.35   0
 -12  -6  -8    8.10    0.34   0
 -11  -8  -3    2.77    0.36   0
 -11  -5  -9   19.38    0.43   0
 -11  -1 -13    2.61    0.29   0
 -11   1 -14   11.86    0.31   0
 -11   2 -14   12.21    0.30   0
 -11   4 -14    9.31    0.29   0
 -10 -10   7    2.70    0.31   0
 -10  -8  -2    1.03    0.30   0
 -10  -3 -11    3.24    0.30   0
 -10  -2 -12   13.53    0.28   0
 -10   0 -13    0.46    0.23   0
 -10   6 -13    1.63    0.16   0
  -9  -9   3   24.63    0.39   0
  -9  -8  -1    1.01    0.29   0
  -9  -7  -4   44.03    0.37   0
  -9  -6  -6   13.84    0.32   0
  -9  -1 -12   46.18    0.35   0
  -9   1 -13    0.29    0.20   0
  -9   8 -11    0.96    0.11   0
  -8  -9   5   12.94    0.31   0
  -8  -6  -5    5.92    0.25   0
  -8  -5  -7   24.00    0.29   0
  -8   0 -12   90.25    0.38   0
  -7  -9   9    0.40    0.21   0
  -7  -9  10   44.56    0.42   0
  -7  -9  11   10.77    0.26   0
  -7  -9  14   11.43    0.25   0
  -7  -9  15    3.86    0.19   0
  -7  -8   2   24.18    0.29   0
  -7  -6  -4   44.87    0.33   0
  -7  -5  -6  257.25    0.62   0
  -7  -3  -9    0.70    0.15   0
  -7   3 -12  107.65    0.31   0
  -6  -8   5    4.73    0.19   0
  -6  -3  -8    0.97    0.13   0
  -6  -2  -9    6.61    0.19   0
  -6   2 -11   50.44    0.23   0
  -5  -7   3    6.40    0.17   0
  -5  -6  -1    7.56    0.14   0
  -5  10  -5   16.27    0.17   0
  -5  11  -3   12.81    0.21   0
  -4  -7   7    0.38    0.13   0
  -4   2  -9    3.89    0.09   0
  -4   3  -9    4.13    0.09   0
  -4  11  -1    0.01    0.21   0
  -4  12   2   14.85    0.31   0
  -3  -5   1   37.07    0.19   0
  -3  -2  -5  120.39    0.26   0
  -3  -1  -6   22.43    0.15   0
  -3   7  -6   29.39    0.11   0
  -3  12   6    7.79    0.35   0
  -2  -5   5    5.31    0.10   0
  -2  -4  22  101.94    0.31   0
  -2  -2  -3    9.15    0.08   0
  -2   0  -5    0.09    0.07   0
  -2   3  -6  218.59    0.14   0
  -2   6  -5    5.59    0.07   0
  -2   7  -4   29.16    0.14   0
  -2   9  -1   29.13    0.20   0
  -2  11   5    0.95    0.26   0
  -2  11   6   39.20    0.42   0
  -1  -3   2   23.12    0.10   0
  -1  -2  23   -0.62    0.24   0
  -1   4  -4   77.92    0.12   0
  -1   8   0   81.83    0.28   0
  -1   9   2   11.58    0.20   0
  -1  10   6    1.73    0.25   0
  -1  10   7    4.20    0.28   0
  -1  10  15   -0.04    0.38   0
   0   0  22  162.07    0.51   0
   0   1  23    6.81    0.29   0
   0   2  23    6.11    0.31   0
   0   5  23    4.89    0.38   0
   0   6   0  309.07    0.43   0
   0   6  22    2.92    0.43   0
   0   7  20    3.74    0.41   0
   0   8  17   75.40    0.50   0
   0   8  18   16.73    0.42   0
   0   9   8    1.26    0.24   0
   0   9   9   15.83    0.32   0
   0   9  10    0.84    0.29   0
   0   9  11   75.92    0.49   0
   0   9  12    4.79    0.34   0
   0   9  14   43.44    0.45   0
   1  -1  14   12.27    0.14   0
   1   0  17    0.09    0.16   0
   1   1   3   66.07    0.14   0
   1   1  18   29.39    0.28   0
   1   2  19    1.18    0.24   0
   1   3  19    0.88    0.25   0
   1   4  19   20.02    0.34   0
   1   5  18   51.94    0.43   0
   1   6   5    2.96    0.17   0
   1   6  17   13.67    0.34   0
   1   7   8    2.68    0.22   0
   1   7   9    0.05    0.23   0
   1   7  10   26.39    0.29   0
   1   7  11   10.55    0.26   0
   1   7  12    5.16    0.25   0
   1   7  14   40.46    0.37   0
 -13  -5  -9    7.37    0.44   0
 -13  -1 -13    5.13    0.35   0
 -12  -8  -3    1.28    0.35   0
 -12  -7  -5    0.17    0.34   0
 -12  -6  -7   -0.04    0.33   0
 -12  -4 -10    1.59    0.34   0
 -12   2 -14    8.20    0.33   0
 -11  -9   1    0.46    0.31   0
 -11  -3 -11    2.88    0.33   0
 -10  -9   2    6.03    0.33   0
 -10  -7  -4    2.44    0.31   0
 -10  -6  -6   16.47    0.36   0
 -10  -5  -8    0.57    0.30   0
  -9  -8   0    0.56    0.26   0
  -9  -3 -10    3.96    0.26   0
  -9  -2 -11    0.33    0.23   0
  -9   2 -13    2.60    0.20   0
  -9   3 -13    0.51    0.21   0
  -9   4 -13   19.03    0.22   0
  -8  -9   6   26.49    0.37   0
  -8  -8   1   20.67    0.33   0
  -8  -7  -2   48.16    0.36   0
  -8  -4  -8  117.97    0.44   0
  -8  -1 -11    7.32    0.21   0
  -7  -9  12   19.95    0.29   0
  -7  -9  13    4.64    0.22   0
  -7  -8   3    2.64    0.22   0
  -7  -4  -7   54.16    0.32   0
  -7   0 -11    0.37    0.17   0
  -7   6 -11    8.66    0.11   0
  -6  -8   6    2.21    0.17   0
  -6  -8  19    0.07    0.11   0
  -6  -7   1    2.25    0.19   0
  -6  -6  -2    6.91    0.21   0
  -6  -4  -6    0.18    0.17   0
  -6   3 -11    8.46    0.14   0
  -5  -5  -3    9.78    0.14   0
  -5   3 -10   94.47    0.24   0
  -4  -7   8   18.60    0.17   0
  -4  -7  16    9.21    0.10   0
  -4  -6   2   41.60    0.21   0
  -4  -5  -1   27.50    0.20   0
  -4   0  -8  216.25    0.37   0
  -4  12   1    4.01    0.29   0
  -3  -6   6   15.16    0.15   0
  -3   8  -5    8.78    0.11   0
  -3  11   1    7.40    0.23   0
  -3  12   5    0.17    0.30   0
  -2  -3  -1   82.10    0.21   0
  -2  -1  -4  344.60    0.35   0
  -2   8  -3   49.52    0.20   0
  -2  10   1    1.89    0.20   0
  -2  11   4   28.00    0.33   0
  -1  -1  25    2.73    0.30   0
  -1   6  -3    0.11    0.09   0
  -1   7  -2   54.52    0.20   0
  -1  10   5    7.02    0.25   0
   0  -3  15    0.33    0.09   0
   0  -2  19   63.93    0.25   0
   0  -1  21   21.14    0.24   0
   0   2  24    0.52    0.34   0
   0   3  24   -0.07    0.35   0
   0   4  24    1.76    0.38   0
   0   5  -1  117.26    0.24   0
   0   7   1   28.95    0.19   0
   0   7  21   23.09    0.47   0
   0   8  19    7.09    0.40   0
   0   9   6   41.39    0.32   0
   0   9   7   10.79    0.27   0
   0   9  15    2.09    0.34   0
   0   9  16   24.07    0.44   0
   1  -1   7   21.92    0.10   0
   1  -1  15   48.08    0.21   0
   1   0  18   45.26    0.26   0
   1   1  19   35.12    0.30   0
   1   2   2   33.86    0.13   0
   1   2  20   38.77    0.34   0
   1   3  20    7.72    0.30   0
   1   4   2    0.17    0.11   0
   1   4  20   51.15    0.43   0
   1   5  19   46.47    0.42   0
   1   6   4   48.42    0.24   0
   1   6  18    3.80    0.33   0
   1   7   6   67.43    0.34   0
   1   7  15    7.97    0.30   0
   1   7  16   37.98    0.40   0
   2   3  13    8.13    0.20   0
   2   4  11   49.18    0.29   0
   2   4  12  339.20    0.63   0
 -13  -7  -5    0.32    0.41   0
 -13  -6  -7    1.20    0.38   0
 -13  -3 -11   -0.30    0.38   0
 -13  -2 -12    4.97    0.39   0
 -12  -9   1    8.38    0.41   0
 -12  -3 -11   -0.21    0.31   0
 -12  -2 -12    6.95    0.27   0
 -12   0 -13   -0.04    0.29   0
 -11  -9   2    3.67    0.35   0
 -11  -7  -4    8.46    0.38   0
 -11  -5  -8    1.91    0.31   0
 -11   0 -13    0.36    0.25   0
 -10  -9   3    4.78    0.31   0
 -10  -8  -1   11.09    0.28   0
 -10  -4  -9    0.27    0.28   0
 -10  -3 -10    6.71    0.28   0
 -10  -2 -11    5.47    0.28   0
 -10   5 -13    0.29    0.20   0
  -9  -6  -5    6.43    0.27   0
  -9  -5  -7    0.35    0.17   0
  -9   0 -12    0.65    0.22   0
  -8  -9   7    4.14    0.23   0
  -8  -9   8    2.87    0.25   0
  -8  -8   2   33.81    0.35   0
  -8  -6  -4   86.78    0.41   0
  -8  -5  -6   63.45    0.36   0
  -8  -2 -10    1.51    0.22   0
  -8   5 -12   46.34    0.22   0
  -7  -8   4   15.00    0.25   0
  -7  -7   0   18.25    0.27   0
  -7  -5  -5   78.66    0.36   0
  -7  -1 -10    4.93    0.19   0
  -6  -8   7    0.22    0.16   0
  -6  -5  -4    5.00    0.19   0
  -6   0 -10  298.75    0.51   0
  -6   9  -8    2.31    0.07   0
  -6  11  -5   29.68    0.22   0
  -5  -7   4   67.36    0.29   0
  -5  -6   0   17.66    0.16   0
  -5  -3  -6    0.45    0.14   0
  -5   0  -9   -0.06    0.12   0
  -4  -7   9    0.82    0.13   0
  -4  -4  -3    0.15    0.10   0
  -4  -1  -7   63.22    0.23   0
  -4  10  -4    0.95    0.14   0
  -4  11  -2   57.48    0.33   0
  -3  -5   2   64.60    0.22   0
  -3  -5  23   20.01    0.18   0
  -3  -4  -1  100.79    0.25   0
  -3   1  -7   34.07    0.13   0
  -3  10  -2    0.85    0.16   0
  -3  11   0    0.55    0.22   0
  -3  12   4   27.95    0.37   0
  -2  -5  19    1.14    0.09   0
  -2  -3  25    1.78    0.24   0
  -2  10   0   61.10    0.34   0
  -2  11   3   25.50    0.31   0
  -1  -4  18   76.18    0.21   0
  -1  -2  24   -0.14    0.23   0
  -1   8  -1   73.80    0.26   0
  -1   9   1   37.30    0.24   0
  -1  10   4    0.90    0.22   0
  -1  11   9   18.39    0.38   0
  -1  11  10   30.21    0.44   0
  -1  11  12    3.84    0.40   0
   0  -3  16    0.18    0.11   0
   0  -2  20   27.74    0.25   0
   0  -1  22    0.55    0.23   0
   0   0  23    4.93    0.27   0
   0   2  25    6.43    0.34   0
   0   9   5    7.63    0.24   0
   0   9  17    1.67    0.31   0
   1  -1  16    0.47    0.13   0
   1   0   4   15.74    0.08   0
   1   0  19    1.81    0.19   0
   1   1  20   60.09    0.36   0
   1   2  21    1.23    0.27   0
   1   3  21    0.67    0.30   0
   1   4  21   10.00    0.35   0
   1   5   2   64.88    0.23   0
   1   5  20   18.08    0.31   0
   1   5  21    2.95    0.33   0
   1   6   3   -0.03    0.13   0
   1   6  19   43.17    0.44   0
   1   6  20   36.32    0.46   0
   1   7  17   58.20    0.45   0
   1   7  18   78.82    0.55   0
   1   8   8    0.99    0.21   0
   1   8   9   43.51    0.34   0
   1   8  10   27.96    0.33   0
   1   8  11    0.88    0.28   0
   1   8  12    0.29    0.29   0
   1   8  13    2.92    0.31   0
   1   8  14    3.54    0.30   0
   2   2   8   10.90    0.15   0
   2   2   9  235.63    0.42   0
   2   2  12  197.79    0.41   0
   2   2  14    5.57    0.19   0
   2   3   8   14.03    0.17   0
   2   3  14   30.67    0.27   0
   2   3  15    2.08    0.22   0
   2   4   9  149.83    0.37   0
   2   4  14    0.18    0.22   0
   2   4  15   16.38    0.27   0
   2   5  12   17.54    0.25   0
   2   5  13   15.88    0.26   0
 -13  -8  -2   -0.03    0.42   0
 -13  -5  -8    7.53    0.41   0
 -13   0 -13    0.18    0.34   0
 -12  -9   2   11.95    0.42   0
 -12  -7  -4    0.16    0.36   0
 -12  -6  -6    5.58    0.38   0
 -12  -5  -8   16.43    0.42   0
 -11  -9   3    2.64    0.35   0
 -11  -8  -1    0.30    0.31   0
 -11  -6  -6   57.11    0.49   0
 -11  -4  -9    0.16    0.29   0
 -11  -2 -11    2.32    0.28   0
 -11  -1 -12   32.61    0.41   0
 -11   1 -13    2.34    0.24   0
 -10  -9   4    4.12    0.33   0
 -10  -7  -3   27.19    0.42   0
 -10  -6  -5    6.80    0.33   0
 -10  -5  -7   37.50    0.39   0
 -10   3 -13    1.78    0.23   0
 -10   4 -13    0.15    0.20   0
 -10   7 -12    3.86    0.17   0
  -9  -9   6   27.49    0.37   0
  -9  -8   1   47.62    0.45   0
  -9  -7  -2    8.15    0.29   0
  -9  -4  -8   11.78    0.27   0
  -9  -1 -11    6.14    0.24   0
  -9   6 -12    8.22    0.17   0
  -8  -9   9    0.91    0.22   0
  -8  -7  -1    1.01    0.23   0
  -8   3 -12    1.27    0.17   0
  -8   4 -12   12.41    0.19   0
  -7   1 -11   16.28    0.18   0
  -6  -8   8   15.03    0.22   0
  -6  -7   2    4.60    0.18   0
  -6  -6  -1   17.92    0.23   0
  -6  -3  -7    0.63    0.12   0
  -6  -1  -9   89.06    0.31   0
  -5  -7   5   10.13    0.17   0
  -5  -4  -4   37.77    0.23   0
  -5  -1  -8    0.28    0.13   0
  -5   9  -7    9.03    0.10   0
  -5  11  -4    4.95    0.17   0
  -4  -7  15   38.75    0.15   0
  -4  -6   3    0.40    0.12   0
  -4  -5   0   46.03    0.22   0
  -4  12   0   14.29    0.30   0
  -3  -6   7  368.79    0.44   0
  -3   9  -4   32.56    0.19   0
  -3  12   3    0.38    0.28   0
  -2  -4   2   91.92    0.21   0
  -2  -4  23    9.98    0.18   0
  -2   9  -2   90.44    0.29   0
  -2  12   7    2.11    0.36   0
  -1  -3  22   47.00    0.26   0
  -1   5  -4    4.75    0.07   0
  -1  10   3   19.75    0.26   0
  -1  11   7    4.79    0.31   0
  -1  11   8    2.20    0.29   0
   0   0  24    3.94    0.25   0
   0   1  -1   10.15    0.03   0
   0   6  -1   14.89    0.13   0
   0   7   0    1.47    0.13   0
   0   8   2   68.21    0.30   0
   0  10   8    4.01    0.31   0
   0  10   9   96.75    0.53   0
   0  10  10   30.67    0.39   0
   0  10  12   26.47    0.37   0
   0  10  13   15.34    0.41   0
   0  10  14    0.98    0.39   0
   1  -1  17   15.00    0.17   0
   1   0  20  162.32    0.49   0
   1   1  21   16.81    0.28   0
   1   2  22   27.35    0.36   0
   1   3  22    0.53    0.30   0
   1   4  22    5.81    0.35   0
   1   5  22   40.49    0.49   0
   1   6  21    4.03    0.41   0
   1   7   4   85.20    0.33   0
   1   7  19    1.12    0.38   0
   1   8   7    2.69    0.23   0
   1   8  15   36.04    0.35   0
   1   8  16   13.50    0.38   0
   1   8  17   12.57    0.38   0
   2   1  10   94.90    0.27   0
   2   1  12   37.25    0.21   0
   2   1  13  123.56    0.34   0
   2   1  14   81.41    0.30   0
   2   2   7  111.43    0.28   0
   2   2  15    0.02    0.18   0
   2   2  16    0.64    0.20   0
   2   3  16   19.40    0.28   0
   2   3  17   10.88    0.24   0
   2   4  16    6.10    0.26   0
   2   5  14   10.75    0.20   0
   2   5  15   11.86    0.28   0
   2   5  16   81.17    0.45   0
   2   6  10   18.92    0.26   0
   2   6  11    4.83    0.22   0
   2   6  12   11.90    0.25   0
   2   6  13    4.71    0.24   0
 -14  -4  -9    5.42    0.39   0
 -13  -8  -1    4.54    0.43   0
 -13  -7  -4    2.79    0.37   0
 -13  -4  -9    1.09    0.37   0
 -13   1 -13    5.01    0.34   0
 -12  -9   3    0.35    0.37   0
 -12  -8  -1    7.80    0.40   0
 -12  -3 -10  102.00    0.56   0
 -12  -2 -11   24.65    0.39   0
 -12   1 -13    3.03    0.31   0
 -11  -9   4    0.41    0.35   0
 -11  -8   0    4.96    0.35   0
 -11  -7  -3    0.55    0.34   0
 -11  -5  -7   -0.13    0.29   0
 -11   5 -13    0.38    0.22   0
 -10  -8   1    0.05    0.27   0
 -10  -4  -8   13.26    0.29   0
 -10   0 -12   45.74    0.38   0
  -9  -9   7    0.92    0.26   0
  -9  -8   2    0.60    0.27   0
  -9  -6  -4   40.27    0.37   0
  -9  -2 -10    4.80    0.24   0
  -8  -9  10   23.99    0.34   0
  -8  -9  11    6.52    0.28   0
  -8  -8   3   61.14    0.41   0
  -8  -6  -3    3.12    0.25   0
  -8  -5  -5   15.16    0.26   0
  -8   0 -11    0.14    0.17   0
  -7  -7   1   10.75    0.24   0
  -7  -5  -4  199.06    0.52   0
  -7  -4  -6    6.44    0.20   0
  -7   2 -11    0.33    0.15   0
  -6  -8   9    1.97    0.17   0
  -6  -8  18    5.01    0.14   0
  -6  -7   3    3.35    0.18   0
  -6  -5  -3   43.99    0.26   0
  -6  -4  -5  111.89    0.37   0
  -6   1 -10   35.67    0.20   0
  -6   6 -10   31.37    0.12   0
  -5  -6   1   11.50    0.15   0
  -5   1  -9   94.23    0.26   0
  -4  -7  11   35.07    0.20   0
  -4  -7  12    0.07    0.11   0
  -4  -7  13    0.33    0.10   0
  -4  -7  14    3.77    0.10   0
  -4  -3  -4  311.08    0.47   0
  -4   1  -8   21.75    0.14   0
  -3  -6   8   45.88    0.18   0
  -3  -2  -4   12.92    0.11   0
  -3   0  -6   42.13    0.15   0
  -3  11  -1    2.63    0.22   0
  -3  12   2    2.64    0.26   0
  -2  -2  -2    2.15    0.09   0
  -2  11   2    7.49    0.25   0
  -2  12   5    9.09    0.31   0
  -2  12   6    1.29    0.31   0
  -1  -4  19    0.98    0.11   0
  -1   9   0    5.78    0.15   0
  -1  10   2   23.60    0.26   0
  -1  11   5   10.89    0.30   0
  -1  11   6    0.97    0.28   0
   0  -3  17    1.44    0.12   0
   0  -2  21   14.33    0.23   0
   0  -1  23    6.33    0.24   0
   0   4  -2  137.57    0.20   0
   0   8   1   82.75    0.30   0
   0   9   3    0.21    0.20   0
   0  10   6    0.22    0.23   0
   0  10   7    9.24    0.31   0
   1  -1   6  209.34    0.21   0
   1  -1  18   29.57    0.21   0
   1   1  22    5.84    0.27   0
   1   2  23    0.29    0.30   0
   1   4  23    3.48    0.35   0
   1   5  23    1.10    0.39   0
   1   6  22    9.80    0.44   0
   1   7   3   59.76    0.27   0
   1   7  20    6.81    0.32   0
   1   7  21    3.39    0.42   0
   1   8   5   34.50    0.28   0
   1   8   6    0.32    0.16   0
   1   8  18    3.85    0.37   0
   1   8  19   18.55    0.44   0
   1   9  10    9.77    0.32   0
   1   9  11   18.04    0.36   0
   1   9  12    0.73    0.32   0
   1   9  15    1.32    0.34   0
   2   1   8   78.19    0.23   0
   2   1  15    0.02    0.18   0
   2   1  16   27.19    0.25   0
   2   2  17   75.63    0.36   0
   2   3   6  196.71    0.37   0
   2   3  18   77.53    0.41   0
   2   4  18    5.31    0.29   0
   2   5   6   53.41    0.26   0
   2   5  17   45.24    0.41   0
   2   5  18  230.30    0.71   0
   2   6   8  138.64    0.42   0
   2   6   9   21.23    0.21   0
   2   6  14   10.95    0.22   0
   2   6  15    0.48    0.27   0
   2   6  16   18.77    0.35   0
 -14  -3 -10    2.39    0.41   0
 -14  -2 -11    0.01    0.37   0
 -13  -5  -7    1.08    0.36   0
 -13  -3 -10   -0.01    0.27   0
 -13   2 -13    0.21    0.29   0
 -12  -9   4    8.36    0.41   0
 -12  -8   0    1.69    0.37   0
 -12  -7  -3    0.46    0.33   0
 -12  -6  -5    1.29    0.33   0
 -12  -5  -7    3.65    0.32   0
 -12   0 -12   16.03    0.32   0
 -12   2 -13    2.30    0.28   0
 -11  -9   5   10.29    0.35   0
 -11  -4  -8  157.17    0.60   0
 -11   0 -12    4.72    0.27   0
 -11   3 -13    0.56    0.22   0
 -10  -9   6    0.22    0.29   0
 -10  -6  -4    0.11    0.28   0
 -10  -5  -6   70.42    0.42   0
 -10  -2 -10   22.76    0.30   0
 -10  -1 -11    0.42    0.23   0
 -10   1 -12   12.81    0.24   0
  -9  -9   8   27.36    0.37   0
  -9  -4  -7   45.44    0.34   0
  -9   2 -12    6.44    0.19   0
  -9   5 -12   22.42    0.22   0
  -8  -9  12    9.40    0.26   0
  -8  -9  13   16.80    0.28   0
  -8  -9  14    0.22    0.23   0
  -8  -9  15    3.57    0.24   0
  -8  -8   4   18.17    0.29   0
  -8  -7   0   15.59    0.27   0
  -8  -2  -9   12.82    0.24   0
  -8  -1 -10   33.74    0.27   0
  -7  -8   6    0.19    0.17   0
  -7  -3  -7    9.03    0.20   0
  -7   0 -10    0.50    0.16   0
  -7   5 -11    2.05    0.12   0
  -6  -8  10    2.64    0.16   0
  -6  -8  11    8.87    0.20   0
  -6  -8  17    1.51    0.13   0
  -6  10  -7   17.93    0.13   0
  -5  -7   6  189.25    0.43   0
  -5  -3  -5    0.05    0.14   0
  -5  10  -6   25.23    0.17   0
  -4  -6   4   49.35    0.22   0
  -4  -4  -2  140.20    0.31   0
  -4  11  -3    0.40    0.19   0
  -4  12  -1    0.08    0.25   0
  -3  -5   3    9.00    0.12   0
  -3  -4   0   49.16    0.20   0
  -3  -3  -2    1.61    0.12   0
  -3  -1  -5   33.40    0.15   0
  -3   2  -7  188.89    0.24   0
  -3  10  -3    3.33    0.14   0
  -3  12   1    0.23    0.27   0
  -2  -5   7   62.78    0.16   0
  -2  -3   0   35.42    0.14   0
  -2   8  -4    5.76    0.13   0
  -2  10  -1   13.58    0.21   0
  -2  11   1    0.33    0.22   0
  -2  12   4   16.55    0.34   0
  -1  -3  23    0.92    0.19   0
  -1   7  -3   58.65    0.20   0
  -1   8  -2   20.98    0.16   0
  -1  11   4   47.26    0.37   0
   0  -3  18    0.04    0.12   0
   0   0  25    0.52    0.27   0
   0  10   5   -0.06    0.23   0
   0  11  11   39.15    0.49   0
   0  11  12   10.12    0.44   0
   1  -2  11   63.03    0.17   0
   1  -2  12  184.68    0.28   0
   1  -2  13   12.72    0.12   0
   1  -2  14    4.19    0.11   0
   1  -1  19   35.19    0.24   0
   1   0  21    5.81    0.26   0
   1   1   2  556.58    0.34   0
   1   1  23    0.51    0.28   0
   1   3  24    6.06    0.35   0
   1   5   1   76.24    0.23   0
   1   9   7   13.72    0.26   0
   1   9  16   29.21    0.44   0
   1   9  17   17.68    0.46   0
   2   1   7   68.69    0.21   0
   2   1  17    8.85    0.21   0
   2   2   6    4.57    0.09   0
   2   2  18   39.12    0.32   0
   2   2  19    1.14    0.25   0
   2   3   5    6.90    0.13   0
   2   3  19    2.45    0.26   0
   2   4  19   30.53    0.38   0
   2   5   5    4.38    0.15   0
   2   6   6    6.06    0.18   0
   2   6  17    0.43    0.28   0
   2   7   9   15.35    0.27   0
   2   7  10   40.29    0.32   0
   2   7  12   11.40    0.23   0
   2   7  13    4.95    0.21   0
   2   7  15   18.51    0.34   0
   2   7  16   71.29    0.48   0
 -14  -6  -5    0.09    0.39   0
 -14  -5  -7    4.36    0.31   0
 -13  -8   0    0.38    0.36   0
 -13  -4  -8   -0.24    0.35   0
 -13   0 -12   -0.02    0.32   0
 -12  -9   5    0.72    0.35   0
 -12  -8   1    5.17    0.35   0
 -12  -7  -2   22.12    0.44   0
 -12  -4  -8   52.40    0.52   0
 -12  -1 -11    0.36    0.28   0
 -12   4 -13    6.45    0.27   0
 -11  -9   6    0.35    0.30   0
 -11  -7  -2   16.20    0.33   0
 -11  -6  -4    5.45    0.32   0
 -11  -3  -9    9.67    0.33   0
 -11  -1 -11    0.79    0.27   0
 -10  -8   2    2.83    0.31   0
 -10  -7  -1    1.01    0.29   0
 -10   6 -12    6.47    0.20   0
  -9  -9   9    1.47    0.23   0
  -9  -9  10   15.62    0.31   0
  -9  -8   3    3.07    0.25   0
  -9  -6  -3    8.88    0.27   0
  -9  -5  -5    5.54    0.23   0
  -9  -1 -10   40.77    0.31   0
  -9   3 -12    7.27    0.19   0
  -8  -8   5    0.46    0.21   0
  -8  -6  -2    6.74    0.24   0
  -7  -8   7    3.87    0.20   0
  -7  -6  -1    0.79    0.20   0
  -7  -1  -9    1.22    0.17   0
  -7   4 -11    2.71    0.13   0
  -6  -8  12   43.70    0.31   0
  -6  -8  13    2.50    0.15   0
  -6  -8  14    5.91    0.18   0
  -6  -8  15   11.21    0.19   0
  -6  -8  16    5.22    0.16   0
  -6  -7   4   -0.14    0.16   0
  -6  -2  -7    9.42    0.17   0
  -6   0  -9    0.08    0.13   0
  -6   2 -10   26.59    0.16   0
  -5  -7   7   11.51    0.17   0
  -5  -6   2  289.31    0.50   0
  -4  -5   1    1.49    0.13   0
  -4  -2  -5   19.65    0.16   0
  -4  -1  -6   59.82    0.22   0
  -4   0  -7    0.35    0.11   0
  -4   8  -7    5.89    0.07   0
  -2  -5  20    0.39    0.09   0
  -2  -4   3    3.44    0.08   0
  -2  -4  24   19.86    0.21   0
  -2   1  -5    4.73    0.06   0
  -2   7  -5   67.38    0.16   0
  -2   9  -3    0.98    0.14   0
  -2  12   3    0.96    0.28   0
  -1  -4   7   11.46    0.06   0
  -1   9  -1    7.24    0.15   0
  -1  10   1    5.09    0.21   0
  -1  11   3    0.68    0.26   0
   0  -2  22   20.36    0.22   0
   0  -1  24    9.06    0.25   0
   0   7  -1   30.17    0.17   0
   0   8   0  132.98    0.36   0
   0   9   2    3.16    0.19   0
   0  10   4   13.63    0.26   0
   0  11   8   26.59    0.39   0
   0  11   9    1.88    0.33   0
   0  11  10    3.45    0.27   0
   1  -2  10   14.08    0.09   0
   1  -2  15   25.28    0.16   0
   1  -1  20   57.56    0.32   0
   1   0  22   30.42    0.30   0
   1   2  24   23.69    0.41   0
   1   6   1   47.20    0.21   0
   1   7   2   53.09    0.25   0
   1  10  11   31.51    0.41   0
   1  10  12    8.84    0.40   0
   1  10  13    5.33    0.40   0
   1  10  14    0.16    0.38   0
   1  10  15    0.50    0.37   0
   2   0  10  303.67    0.41   0
   2   0  11    0.13    0.12   0
   2   0  12  142.43    0.32   0
   2   0  13    0.80    0.13   0
   2   0  14    1.22    0.13   0
   2   0  15   -0.10    0.13   0
   2   1  18   94.01    0.39   0
   2   2   5    6.53    0.12   0
   2   2  20  150.07    0.52   0
   2   3  20   30.16    0.35   0
   2   4   4    4.61    0.14   0
   2   4  20  106.31    0.49   0
   2   4  21   11.37    0.33   0
   2   5  20    3.15    0.33   0
   2   6   5    5.12    0.17   0
   2   6  19    0.53    0.33   0
   2   7  17    5.55    0.31   0
   2   7  18   23.97    0.42   0
   2   8  10   30.60    0.33   0
   2   8  11   28.09    0.35   0
   2   8  12   17.02    0.33   0
   2   8  13    2.46    0.29   0
   2   8  14    1.16    0.29   0
   2   8  15    8.48    0.31   0
 -14  -5  -6    0.07    0.36   0
 -14  -4  -8    0.32    0.28   0
 -14  -3  -9    1.50    0.38   0
 -14  -2 -10    8.23    0.42   0
 -14  -1 -11    5.67    0.39   0
 -13  -8   1    1.30    0.40   0
 -13  -7  -2   -0.28    0.37   0
 -13  -6  -4    4.93    0.36   0
 -13  -5  -6    0.39    0.35   0
 -13  -2 -10   32.39    0.43   0
 -13  -1 -11    0.91    0.32   0
 -13   1 -12    4.33    0.30   0
 -12  -6  -4  101.40    0.68   0
 -12  -5  -6    8.23    0.35   0
 -12  -3  -9    1.05    0.24   0
 -12  -2 -10   20.25    0.38   0
 -12   1 -12   11.98    0.30   0
 -11  -8   2    4.78    0.34   0
 -10  -9   8   15.65    0.33   0
 -10  -8   3    5.73    0.31   0
 -10   0 -11   -0.08    0.23   0
 -10   2 -12   12.37    0.25   0
  -9  -9  11    0.05    0.24   0
  -9  -2  -9    3.12    0.21   0
  -8  -8   6   21.78    0.31   0
  -8  -5  -4  145.01    0.47   0
  -8  -3  -7    5.34    0.21   0
  -8   0 -10    6.66    0.19   0
  -8   2 -11   55.98    0.27   0
  -8   6 -11    1.54    0.12   0
  -7  -8   8    2.28    0.19   0
  -7  -5  -3   10.62    0.22   0
  -7   1 -10    4.59    0.15   0
  -6  -7   5    0.56    0.17   0
  -6  -6   1    0.05    0.17   0
  -6  -4  -4   13.79    0.15   0
  -6   5 -10  148.75    0.26   0
  -6  11  -6    9.04    0.17   0
  -5  -7   8   78.30    0.29   0
  -5  -1  -7    2.37    0.13   0
  -4  -6   5   33.50    0.18   0
  -4   2  -8  126.71    0.23   0
  -4  10  -5    0.29    0.12   0
  -3  -6  10   50.32    0.17   0
  -3  -5   4   81.40    0.23   0
  -3  11  -2   37.55    0.28   0
  -2  -1  -3   60.32    0.15   0
  -2   5  -6   55.84    0.07   0
  -2  10  -2   12.84    0.21   0
  -2  11   0    1.46    0.20   0
  -1  -4  20   41.19    0.18   0
  -1  -3  24   35.39    0.27   0
  -1  -1  -1  144.04    0.16   0
  -1   6  -4   50.61    0.15   0
  -1  12   6   20.29    0.41   0
   0  -3  19    3.43    0.14   0
   0  -1  25    6.69    0.28   0
   0   6  -2    1.02    0.09   0
   0   9   1   10.12    0.20   0
   0  10   3    0.57    0.19   0
   0  11   6    1.46    0.26   0
   1   0  23    0.62    0.24   0
   1   1  24   -0.17    0.27   0
   1   2  25   54.25    0.49   0
   1   8   3   15.64    0.21   0
   1   9   5    0.13    0.23   0
   1  10   8    1.86    0.29   0
   1  10   9    9.48    0.32   0
   1  10  10    5.97    0.26   0
   2   0  16   14.96    0.18   0
   2   0  17    0.59    0.17   0
   2   1   6   96.30    0.23   0
   2   1  19   13.02    0.28   0
   2   2  21    0.25    0.30   0
   2   3   4   91.10    0.23   0
   2   3  21    8.48    0.25   0
   2   3  22   11.49    0.32   0
   2   4  22    0.18    0.32   0
   2   5   4  146.40    0.34   0
   2   5  22    2.55    0.34   0
   2   6  21   11.26    0.43   0
   2   7   6   85.82    0.37   0
   2   7  19    1.28    0.35   0
   2   7  20    0.09    0.35   0
   2   8   8    4.77    0.24   0
   2   8   9    0.16    0.22   0
   2   8  16    3.05    0.32   0
   2   8  17    0.47    0.35   0
   2   8  18    9.63    0.39   0
   3   4  11  133.66    0.42   0
   3   4  12    3.35    0.20   0
   3   4  13    0.59    0.22   0
   3   4  14    1.11    0.22   0
   3   5  13    0.90    0.20   0
 -14  -6  -4    0.46    0.35   0
 -13  -8   2    1.38    0.34   0
 -12  -8   2   17.84    0.44   0
 -12  -7  -1    0.26    0.35   0
 -12  -4  -7    3.85    0.32   0
 -12   0 -11    0.16    0.25   0
 -12   2 -12    6.42    0.29   0
 -11  -9   8    6.65    0.33   0
 -11  -8   3    2.59    0.29   0
 -11  -6  -3    5.06    0.32   0
 -11  -5  -5    0.19    0.26   0
 -11  -4  -7    9.41    0.25   0
 -11   0 -11    0.24    0.24   0
 -11   6 -12    0.63    0.21   0
 -10  -9   9    2.97    0.28   0
 -10  -9  10   16.56    0.34   0
 -10  -7   0    0.64    0.27   0
 -10  -2  -9    0.85    0.25   0
 -10  -1 -10   94.86    0.46   0
 -10   3 -12   52.65    0.38   0
 -10   4 -12    0.23    0.20   0
 -10   5 -12   18.92    0.23   0
  -9  -9  12    4.30    0.27   0
  -9  -9  13    0.27    0.25   0
  -9  -9  14    0.90    0.25   0
  -9  -8   5   -0.17    0.23   0
  -9  -7   1    0.45    0.23   0
  -9  -6  -2   67.39    0.41   0
  -9  -5  -4   15.84    0.26   0
  -9   7 -11    1.01    0.14   0
  -8  -7   2    0.27    0.22   0
  -8  -6  -1    1.58    0.21   0
  -8  -1  -9    0.37    0.19   0
  -8   8 -10    0.21    0.09   0
  -7  -8   9    2.27    0.20   0
  -7  -6   0    9.90    0.23   0
  -7  -3  -6  119.17    0.38   0
  -7   7 -10    0.71    0.08   0
  -6   4 -10    1.17    0.10   0
  -5  -6   3   22.57    0.18   0
  -5  -5   0  104.65    0.32   0
  -5  11  -5    0.34    0.15   0
  -4  -4  -1   19.44    0.14   0
  -4  -3  -3    1.20    0.09   0
  -4  12  -2    0.29    0.21   0
  -3  -4   1    0.47    0.10   0
  -3  -2  -3    5.24    0.10   0
  -3   8  -6    4.53    0.09   0
  -2  -5   8   81.52    0.16   0
  -2  12   2    9.89    0.28   0
  -1  10   0   44.73    0.28   0
  -1  11   2    2.82    0.23   0
  -1  12   5    3.04    0.31   0
   0  -3  20    1.83    0.13   0
   0  -2  23    5.99    0.21   0
   0  11   5    0.94    0.26   0
   1  -2  17   13.59    0.15   0
   1  -2  18   26.83    0.20   0
   1  -1  21   14.80    0.24   0
   1   0   3    0.25    0.05   0
   1   5   0  279.28    0.39   0
   1   7   1    0.63    0.13   0
   1   8   2   19.53    0.21   0
   1   9   4  159.17    0.50   0
   1  10   7   56.80    0.43   0
   2   0   8   62.96    0.19   0
   2   0  18   99.61    0.35   0
   2   1  20   22.16    0.28   0
   2   2   4  109.05    0.23   0
   2   2  22   49.69    0.41   0
   2   3  23    1.52    0.30   0
   2   4   3   46.41    0.21   0
   2   4  23   -0.07    0.35   0
   2   5   3    4.95    0.14   0
   2   6   4    0.38    0.11   0
   2   7   5   68.79    0.33   0
   2   9  10   47.89    0.42   0
   2   9  11   51.40    0.45   0
   2   9  12   23.37    0.39   0
   2   9  13    0.30    0.33   0
   2   9  14   42.47    0.48   0
   2   9  15    1.01    0.38   0
   2   9  16   13.55    0.41   0
   3   3  10    0.59    0.16   0
   3   3  11    3.47    0.17   0
   3   3  13   26.35    0.22   0
   3   3  14   31.44    0.27   0
   3   3  15   15.59    0.26   0
   3   3  16   92.64    0.41   0
   3   4   9   28.17    0.22   0
   3   4  10  548.52    0.72   0
   3   4  15   28.04    0.25   0
   3   4  16    0.93    0.23   0
   3   4  17   12.33    0.28   0
   3   5   9   16.22    0.21   0
   3   5  10   12.52    0.22   0
   3   5  11   15.42    0.20   0
   3   5  14  126.19    0.45   0
   3   5  15    0.35    0.24   0
   3   5  16  152.87    0.57   0
   3   6  11   21.29    0.27   0
   3   6  12   46.78    0.34   0
   3   6  13   25.28    0.30   0
   3   6  14   13.69    0.30   0
   3   6  15    1.04    0.28   0
 -14  -7  -1    1.88    0.37   0
 -14  -6  -3    1.10    0.35   0
 -14  -5  -5    1.79    0.34   0
 -14  -3  -8    0.06    0.36   0
 -14   0 -11   -0.17    0.34   0
 -13  -7  -1    6.51    0.34   0
 -13  -6  -3   16.47    0.44   0
 -13  -5  -5    2.67    0.34   0
 -13  -1 -10    3.34    0.30   0
 -13   0 -11    0.13    0.30   0
 -12  -6  -3    0.14    0.31   0
 -12  -3  -8  122.01    0.66   0
 -12  -1 -10   52.74    0.52   0
 -12   3 -12    0.18    0.24   0
 -11  -9   9    2.22    0.30   0
 -11  -7   0    0.48    0.30   0
 -11  -2  -9    8.03    0.31   0
 -11   3 -12   23.78    0.33   0
 -10  -9  11    0.37    0.26   0
 -10  -6  -2    6.37    0.30   0
 -10  -4  -6    3.12    0.24   0
 -10   1 -11    0.09    0.21   0
  -9  -3  -7    0.95    0.21   0
  -9   0 -10   45.43    0.31   0
  -9   2 -11    0.41    0.16   0
  -8  -8   7    0.37    0.21   0
  -8  -5  -3    0.63    0.21   0
  -8   5 -11    0.78    0.13   0
  -7  -8  10    8.80    0.22   0
  -7  -7   4   30.43    0.27   0
  -7  -5  -2    3.49    0.18   0
  -7  -4  -4    0.15    0.17   0
  -7  -1  -8   39.76    0.24   0
  -7   0  -9   -0.00    0.15   0
  -6  -6   2   23.81    0.22   0
  -6  -4  -3    2.22    0.15   0
  -6   1  -9   85.14    0.26   0
  -5  -7   9    6.53    0.13   0
  -5  -4  -2   27.33    0.19   0
  -4  -6   6    0.21    0.10   0
  -4  -5   2   16.13    0.14   0
  -4  11  -4    2.89    0.16   0
  -3  -6  11    1.20    0.08   0
  -3  -3  -1   23.53    0.14   0
  -3   3  -7    1.84    0.05   0
  -3  10  -4   18.39    0.17   0
  -2  -5  21    6.25    0.11   0
  -2  11  -1   25.08    0.28   0
  -1  -4  21    8.53    0.15   0
  -1  -2   1   12.32    0.07   0
  -1   8  -3   15.05    0.14   0
  -1   9  -2   94.58    0.30   0
  -1  12   4    3.32    0.29   0
   0  -2  24   -0.11    0.23   0
   0   7  -2   48.83    0.20   0
   0   8  -1   82.07    0.27   0
   0   9   0    0.07    0.16   0
   0  10   2   60.28    0.34   0
   0  11   4   15.68    0.29   0
   1  -1   5   32.92    0.08   0
   1  -1  22    5.99    0.21   0
   1   0  24    5.09    0.25   0
   1   6   0   17.44    0.15   0
   1   9   3    0.62    0.21   0
   1  10   6    0.32    0.25   0
   1  11   9   37.08    0.42   0
   1  11  10    1.55    0.37   0
   1  11  11   10.25    0.41   0
   2   0  19    3.15    0.20   0
   2   1   5    4.93    0.10   0
   2   1  21    0.19    0.21   0
   2   2  23    5.50    0.34   0
   2   3   3    0.23    0.10   0
   2   6   3   94.42    0.30   0
   2   7   4   28.98    0.24   0
   2   8   6    0.03    0.16   0
   2   9   8   29.17    0.34   0
   2   9   9   36.61    0.36   0
   2   9  17   26.62    0.42   0
   3   2  11   44.91    0.25   0
   3   2  14   64.02    0.31   0
   3   2  15   23.24    0.25   0
   3   3   8    9.48    0.16   0
   3   3   9    5.76    0.12   0
   3   3  17   -0.16    0.21   0
   3   3  18   85.59    0.43   0
   3   4   8  163.04    0.40   0
   3   4  18   48.96    0.40   0
   3   4  19   14.30    0.32   0
   3   5   8    1.11    0.17   0
   3   7  12   66.64    0.41   0
   3   7  13   10.64    0.29   0
   3   7  14   37.11    0.37   0
 -14  -7   0    5.05    0.43   0
 -14  -2  -9    0.52    0.32   0
 -14  -1 -10    0.27    0.26   0
 -13  -8   3    1.81    0.34   0
 -13  -7   0   39.57    0.58   0
 -13  -2  -9    3.69    0.32   0
 -12  -8   4   33.27    0.43   0
 -12   1 -11    0.20    0.24   0
 -12   4 -12    3.05    0.25   0
 -12   5 -12   15.46    0.28   0
 -11  -9  10   11.27    0.34   0
 -11  -6  -2    0.49    0.27   0
 -11  -4  -6   48.45    0.44   0
 -11   1 -11    0.72    0.23   0
 -10  -7   1   15.07    0.28   0
 -10  -3  -7   11.09    0.26   0
 -10   0 -10   48.14    0.32   0
  -9  -7   2   25.01    0.32   0
  -9  -6  -1    2.93    0.24   0
  -9  -4  -5    6.47    0.22   0
  -9  -2  -8    0.62    0.15   0
  -9  -1  -9   16.59    0.24   0
  -8  -8   8   -0.37    0.21   0
  -8  -7   3    2.04    0.21   0
  -8  -6   0   56.33    0.33   0
  -8  -3  -6  107.42    0.38   0
  -8   1 -10   32.98    0.25   0
  -7  -8  11    7.94    0.20   0
  -7  -8  12   30.04    0.30   0
  -7  -6   1   11.90    0.22   0
  -6  -2  -6    7.75    0.16   0
  -5  -7  10    5.70    0.16   0
  -5  -6   4  118.82    0.33   0
  -5  -2  -5  266.99    0.44   0
  -5   1  -8    0.19    0.10   0
  -5   4  -9    2.34    0.08   0
  -5   5  -9   18.90    0.09   0
  -4  -2  -4   60.57    0.22   0
  -4   3  -8    0.04    0.07   0
  -3  -6  12    0.72    0.08   0
  -3  -5   5  162.44    0.30   0
  -3  -1  -4  421.98    0.43   0
  -3  11  -3   11.00    0.20   0
  -3  12  -1   30.90    0.31   0
  -2  -4   4   72.59    0.17   0
  -2  -3   1   19.40    0.11   0
  -2  -2  -1 9999.99    1.78   0
  -2   9  -4   34.76    0.19   0
  -1  -3  25   12.29    0.23   0
  -1   7  -4   87.23    0.21   0
  -1  10  -1   55.06    0.29   0
  -1  11   1    1.24    0.21   0
  -1  12   3    2.05    0.26   0
   0  -3  21   29.46    0.20   0
   0  12   7    0.79    0.37   0
   1  -2  19    1.18    0.15   0
   1  -1  23    0.16    0.23   0
   1   0  25    0.22    0.27   0
   1   7   0   23.97    0.19   0
   1   8   1   75.08    0.30   0
   1  10   5    2.82    0.23   0
   1  11   8   15.77    0.36   0
   2  -1  12   35.67    0.16   0
   2  -1  13  123.72    0.28   0
   2  -1  14   83.81    0.25   0
   2  -1  15    0.26    0.12   0
   2  -1  16   25.89    0.19   0
   2   0   7    0.01    0.07   0
   2   0  20  217.58    0.54   0
   2   1  22    5.01    0.26   0
   2   2  24    9.90    0.34   0
   2   8   5   12.54    0.19   0
   2  10  10    6.63    0.32   0
   2  10  11   12.56    0.39   0
   2  10  12    8.54    0.39   0
   2  10  13    7.82    0.40   0
   2  10  14    0.33    0.41   0
   3   2   9   44.73    0.22   0
   3   2  17   -0.11    0.20   0
   3   2  18   76.38    0.38   0
   3   3   7    1.74    0.14   0
   3   3  19    9.57    0.30   0
   3   3  20   60.87    0.42   0
   3   4   7   73.31    0.26   0
   3   4  20   67.52    0.47   0
   3   5  20   19.08    0.40   0
   3   6   7    8.13    0.20   0
   3   6  19    0.08    0.36   0
   3   7   9    0.59    0.22   0
   3   8  12   41.23    0.39   0
   3   8  13   18.67    0.33   0
   3   8  14    2.38    0.30   0
   3   8  15    0.39    0.29   0
 -15  -5  -4    1.47    0.39   0
 -15  -4  -6    6.46    0.33   0
 -15  -3  -7    0.12    0.35   0
 -14  -6  -2    6.96    0.39   0
 -14  -5  -4    4.87    0.37   0
 -14  -4  -6   11.46    0.39   0
 -13  -8   4   33.32    0.54   0
 -13  -6  -2   80.40    0.64   0
 -13   1 -11    0.86    0.28   0
 -12  -6  -2    0.49    0.28   0
 -12  -5  -4    2.87    0.30   0
 -11  -8   5    0.30    0.29   0
 -11  -3  -7    0.43    0.26   0
 -11   0 -10   13.85    0.28   0
 -10  -8   6   18.09    0.35   0
 -10  -7   2   21.88    0.39   0
 -10  -6  -1   34.01    0.34   0
 -10  -4  -5   74.64    0.38   0
 -10  -1  -9    6.26    0.24   0
 -10   2 -11    5.77    0.22   0
 -10   7 -11    0.09    0.14   0
  -9  -8   7   11.94    0.28   0
  -9  -7   3   21.83    0.30   0
  -9   1 -10   41.66    0.27   0
  -9   3 -11    5.71    0.18   0
  -9   6 -11    1.23    0.14   0
  -8  -8   9    0.33    0.19   0
  -8  -7   4   17.87    0.27   0
  -8  -5  -2  247.99    0.55   0
  -8  -4  -4   10.69    0.21   0
  -8  -2  -7   40.90    0.27   0
  -8   0  -9   -0.19    0.17   0
  -7  -8  13   58.84    0.43   0
  -7  -3  -5   20.48    0.21   0
  -7   3 -10  111.85    0.30   0
  -6  -7   7   65.19    0.29   0
  -6  -6   3    2.74    0.16   0
  -6  -5   0   73.48    0.29   0
  -6   2  -9    6.53    0.13   0
  -5  -7  11    0.23    0.13   0
  -5  -5   1   32.43    0.18   0
  -5  -1  -6   10.25    0.15   0
  -5   0  -7   -0.06    0.11   0
  -4  -6   7   47.13    0.20   0
  -4  -5   3    1.72    0.11   0
  -4  -4   0   68.14    0.24   0
  -4  -3  -2   11.31    0.14   0
  -4  -1  -5  135.20    0.29   0
  -4  12  -3   21.59    0.26   0
  -3   0  -5    0.04    0.08   0
  -2  -5   9   12.14    0.08   0
  -2   8  -5   12.53    0.13   0
  -2  10  -3    7.12    0.16   0
  -2  12   0   12.30    0.30   0
  -1  -4  22   25.42    0.19   0
   0  -2  25    7.04    0.26   0
   0   5  -3   28.86    0.12   0
   0  10   1   28.20    0.27   0
   0  11   3    4.55    0.25   0
   1  -2   8  206.86    0.20   0
   1  -2  20   36.86    0.22   0
   1   9   2   94.04    0.37   0
   1  10   4    3.35    0.23   0
   1  11   6   21.88    0.33   0
   2  -1  17    9.20    0.15   0
   2   0  21    7.46    0.27   0
   2   2   3    9.11    0.10   0
   2   4   2  187.28    0.33   0
   2   8   4    5.93    0.21   0
   2   9   6   11.77    0.26   0
   2  10   8    8.27    0.31   0
   2  10   9   25.46    0.39   0
   3   1  11    6.05    0.14   0
   3   1  14   49.79    0.26   0
   3   1  15   20.32    0.22   0
   3   1  16   13.68    0.21   0
   3   1  17    9.87    0.21   0
   3   2   8  402.78    0.53   0
   3   2  19   17.81    0.30   0
   3   2  20   52.74    0.39   0
   3   3  21    1.94    0.30   0
   3   4   6    1.69    0.14   0
   3   5   6  107.39    0.32   0
   3   5  22    0.05    0.33   0
   3   6   6  139.98    0.41   0
   3   6  21    0.12    0.40   0
   3   7   7    4.97    0.22   0
   3   7  20    0.51    0.41   0
   3   8  10    3.19    0.28   0
   3   8  16    1.75    0.25   0
   3   8  17   -0.41    0.36   0
   3   8  18   37.46    0.50   0
 -15  -1  -9    0.18    0.37   0
 -14  -7   1    2.53    0.40   0
 -14  -3  -7   -0.11    0.26   0
 -14  -1  -9    0.83    0.33   0
 -14   0 -10    7.02    0.32   0
 -14   2 -11   -0.06    0.29   0
 -13  -8   5    0.39    0.36   0
 -13  -7   1    7.60    0.40   0
 -13  -2  -8    0.95    0.32   0
 -13  -1  -9    3.49    0.31   0
 -13   0 -10    9.28    0.34   0
 -13   2 -11   -0.09    0.27   0
 -12  -8   5    2.60    0.32   0
 -12  -2  -8   63.31    0.49   0
 -12  -1  -9    9.78    0.31   0
 -12   0 -10    4.89    0.22   0
 -12   2 -11   21.27    0.31   0
 -11  -8   6    9.64    0.35   0
 -11  -7   2    0.62    0.28   0
 -11  -6  -1    3.75    0.30   0
 -11  -5  -3    1.11    0.25   0
 -11  -4  -5    3.30    0.27   0
 -11  -1  -9    1.01    0.18   0
 -10  -8   7   26.54    0.40   0
 -10  -5  -3   -0.08    0.16   0
  -9  -8   8   20.38    0.30   0
  -9  -6   0   12.93    0.25   0
  -9   5 -11    7.53    0.16   0
  -8  -8  10    0.35    0.20   0
  -8   2 -10    1.64    0.14   0
  -7  -8  15    2.33    0.19   0
  -7  -8  16   -0.06    0.16   0
  -7  -8  17    5.67    0.18   0
  -7  -7   6   33.99    0.26   0
  -7  -6   2   47.69    0.28   0
  -7  -5  -1   12.47    0.17   0
  -7  -4  -3  100.73    0.36   0
  -7   1  -9    1.14    0.13   0
  -7   4 -10    6.36    0.14   0
  -7   6 -10    5.13    0.11   0
  -6  -7   8   43.46    0.24   0
  -6  -4  -2    2.90    0.15   0
  -6  -3  -4    0.74    0.13   0
  -5  -7  12    0.43    0.12   0
  -5  -6   5   26.46    0.18   0
  -5  -4  -1   41.13    0.21   0
  -5  -3  -3    2.63    0.14   0
  -4   4  -8  117.98    0.18   0
  -4   5  -8    3.28    0.05   0
  -3  -6  13    0.23    0.07   0
  -3  -6  17    0.89    0.05   0
  -3  -4   2   67.65    0.20   0
  -3   4  -7   74.21    0.10   0
  -3  12  -2   -0.01    0.21   0
  -2   6  -6    6.06    0.05   0
  -1  -4   8  470.46    0.24   0
  -1  11   0   45.99    0.32   0
  -1  12   2    9.50    0.28   0
   0  -3  22   42.37    0.24   0
   0  -2   4  161.14    0.06   0
   0   8  -2   68.38    0.25   0
   0   9  -1    9.17    0.15   0
   0  11   2   69.96    0.40   0
   0  12   5    0.49    0.28   0
   1  -2  21    1.29    0.18   0
   1  -1  24   -0.03    0.23   0
   1   4  -1    7.99    0.09   0
   1   6  -1    0.08    0.10   0
   1  10   3   11.42    0.25   0
   1  11   5    3.93    0.30   0
   2  -1  10   93.80    0.21   0
   2  -1  18   87.31    0.30   0
   2  -1  19   12.31    0.23   0
   2   0  22    5.15    0.24   0
   2   1  24   14.69    0.32   0
   2   3   2    7.45    0.11   0
   2   7   2   46.66    0.25   0
   2   8   3   51.14    0.29   0
   2   9   5    5.13    0.23   0
   2  10   7    5.43    0.31   0
   2  11  11    8.54    0.42   0
   3   1  10    4.87    0.14   0
   3   1  18   14.43    0.24   0
   3   2   7  203.38    0.37   0
   3   2  21    5.29    0.31   0
   3   3   6  115.48    0.30   0
   3   4   5    3.29    0.14   0
   3   4  23    2.90    0.36   0
   3   6   5    4.67    0.18   0
   3   7   6   29.87    0.27   0
   3   9  10    2.62    0.28   0
   3   9  11   14.61    0.35   0
   3   9  12   20.99    0.39   0
   3   9  13   18.86    0.37   0
   3   9  14    7.94    0.36   0
   3   9  15   -0.08    0.33   0
   3   9  16    1.83    0.39   0
   4   5  13    6.45    0.23   0
   4   5  14   51.95    0.35   0
   4   5  15    0.89    0.24   0
 -15  -4  -5    3.21    0.30   0
 -14  -7   2    3.88    0.39   0
 -14  -6  -1   19.28    0.49   0
 -14  -5  -3    5.96    0.37   0
 -14  -4  -5   -0.18    0.32   0
 -14   1 -10    0.48    0.29   0
 -13  -8   6   24.44    0.43   0
 -13  -7   2   11.57    0.42   0
 -13  -6  -1    3.63    0.34   0
 -13  -4  -5    9.06    0.33   0
 -13   3 -11    0.27    0.25   0
 -12  -8   6    3.54    0.34   0
 -12  -7   2    3.05    0.33   0
 -12  -5  -3   -0.02    0.27   0
 -12  -4  -5    0.13    0.20   0
 -12   3 -11    0.19    0.22   0
 -11  -8   7   -0.04    0.27   0
 -11  -3  -6    1.23    0.23   0
 -11   1 -10   61.97    0.35   0
 -11   3 -11    2.55    0.22   0
 -10  -8   8   29.77    0.43   0
 -10  -6   0   14.28    0.28   0
 -10   1 -10   79.93    0.40   0
 -10   4 -11    0.78    0.17   0
 -10   5 -11    0.71    0.18   0
 -10   6 -11    2.55    0.17   0
  -9  -8   9    1.04    0.22   0
  -9  -5  -2   28.52    0.28   0
  -9  -2  -7    7.19    0.18   0
  -8  -8  11   34.02    0.35   0
  -8  -7   5    0.38    0.20   0
  -8  -3  -5    1.67    0.19   0
  -7  -1  -7    5.78    0.16   0
  -7   0  -8  266.72    0.48   0
  -7   5 -10    5.69    0.12   0
  -6  -7   9   83.12    0.32   0
  -6  -6   4  199.22    0.44   0
  -5  -7  13   32.85    0.21   0
  -5  -7  19    0.17    0.10   0
  -5  -5   2    1.41    0.13   0
  -5   2  -8   82.82    0.22   0
  -4  -6   8    3.71    0.10   0
  -3  -6  14    0.23    0.07   0
  -3  -6  15   24.76    0.11   0
  -3  -5   6  153.57    0.28   0
  -3  -2  -2  818.91    0.58   0
  -2  -5  22    2.24    0.09   0
  -1   9  -3    0.27    0.12   0
  -1  10  -2   28.01    0.22   0
  -1  12   1    3.54    0.28   0
   0  -3  23    9.77    0.20   0
   0  10   0   49.22    0.30   0
   0  12   4    0.21    0.29   0
   1  -2  22   27.27    0.25   0
   1  -1  25    2.33    0.27   0
   1   1   1  141.90    0.15   0
   1   8   0   81.61    0.30   0
   1   9   1    7.43    0.19   0
   1  11   4   -0.01    0.29   0
   2  -1   9   12.16    0.12   0
   2  -1  20   24.80    0.26   0
   2   0   6  313.58    0.33   0
   2   0  23    0.24    0.22   0
   2   1   4  327.06    0.33   0
   2   9   4   34.78    0.31   0
   2  10   6    1.57    0.27   0
   2  11   9   21.56    0.41   0
   2  11  10    5.50    0.35   0
   3   1   9    2.04    0.13   0
   3   1  19    8.67    0.23   0
   3   1  20   55.62    0.34   0
   3   2  22    0.21    0.29   0
   3   3   5    3.15    0.12   0
   3   7   5   47.90    0.30   0
   3   8   6    4.52    0.21   0
   3   8   7   10.89    0.20   0
   3   9   8   37.21    0.36   0
   3   9   9   47.39    0.41   0
   3  10  13    2.51    0.36   0
   3  10  14    0.69    0.37   0
   4   3  13   -0.11    0.19   0
   4   3  14   58.18    0.33   0
   4   3  15   12.65    0.23   0
   4   4  11    5.48    0.20   0
   4   4  12   46.78    0.30   0
   4   4  13   63.36    0.31   0
   4   4  14    9.65    0.19   0
   4   4  16    0.33    0.25   0
   4   4  17   11.74    0.30   0
   4   5  10  121.99    0.41   0
   4   5  11   19.16    0.25   0
   4   5  12   88.44    0.36   0
   4   5  16   11.04    0.30   0
   4   5  17   11.19    0.33   0
   4   5  18    1.27    0.31   0
   4   6  11  135.83    0.47   0
   4   6  13   17.76    0.29   0
   4   6  14   29.05    0.29   0
   4   6  15   14.49    0.31   0
   4   6  16   27.91    0.36   0
   4   6  17    0.13    0.32   0
   4   7  14    5.30    0.30   0
   4   7  15   10.91    0.30   0
   4   7  16   39.89    0.42   0
 -15  -6   0    7.08    0.42   0
 -15  -3  -6    1.32    0.31   0
 -15  -2  -7    0.07    0.37   0
 -15  -1  -8    5.62    0.39   0
 -15   0  -9   -0.16    0.35   0
 -14  -3  -6    5.94    0.39   0
 -14  -2  -7   -0.19    0.30   0
 -14   0  -9   -0.05    0.27   0
 -13  -6   0    1.27    0.31   0
 -13   1 -10    2.44    0.29   0
 -13   4 -11   17.20    0.37   0
 -12  -8   7    3.92    0.34   0
 -12  -7   3    5.30    0.34   0
 -12  -6   0    5.03    0.33   0
 -12   1 -10   48.41    0.42   0
 -12   4 -11    1.04    0.22   0
 -12   6 -11    2.91    0.24   0
 -11  -7   3    9.32    0.32   0
 -11  -6   0   14.75    0.33   0
 -11  -2  -7    0.44    0.24   0
 -11   4 -11    4.59    0.21   0
 -11   6 -11    1.21    0.20   0
 -10  -7   4    4.91    0.25   0
 -10  -5  -2   14.39    0.27   0
  -9  -8  10    5.20    0.25   0
  -9  -3  -5  108.13    0.41   0
  -9   2 -10    3.92    0.17   0
  -9   8 -10    0.40    0.12   0
  -8  -8  12    0.35    0.20   0
  -8  -8  13    5.83    0.23   0
  -8  -6   2  114.62    0.41   0
  -8  -5  -1    7.13    0.17   0
  -8  -4  -3    1.43    0.18   0
  -8  -2  -6  347.70    0.60   0
  -8   1  -9    0.10    0.14   0
  -8   7 -10   31.27    0.18   0
  -7  -6   3    1.25    0.17   0
  -7  -3  -4   89.34    0.31   0
  -6   1  -8    0.27    0.11   0
  -6   3  -9    1.55    0.10   0
  -6   7  -9    0.07    0.06   0
  -5  -7  15   43.24    0.24   0
  -5  -7  18   14.07    0.16   0
  -5  -6   6    6.75    0.13   0
  -5  -2  -4   42.08    0.20   0
  -4  -5   4  203.20    0.35   0
  -4  -4   1   66.96    0.22   0
  -4  -2  -3  392.42    0.46   0
  -4  10  -6   36.42    0.17   0
  -4  11  -5   -0.01    0.14   0
  -3  -3   0   50.99    0.16   0
  -3  10  -5    1.92    0.13   0
  -3  11  -4   37.30    0.24   0
  -2  -5  10   41.89    0.11   0
  -2  -1  -2  102.15    0.18   0
  -2  12  -1    1.99    0.23   0
  -1  11  -1   19.66    0.25   0
   0  11   1    7.10    0.23   0
   0  12   3    2.71    0.27   0
   1   7  -1   54.11    0.22   0
   1  10   2   27.29    0.26   0
   1  12   6    1.31    0.33   0
   2  -1  21   -0.08    0.22   0
   2   0  24   54.63    0.37   0
   2   4   1    4.77    0.12   0
   2   7   1  114.61    0.32   0
   2   8   2    6.04    0.18   0
   2   9   3    1.30    0.21   0
   2  10   5   12.58    0.28   0
   2  11   7   14.55    0.33   0
   2  11   8    6.57    0.31   0
   3   0  12  338.86    0.47   0
   3   0  13    7.04    0.17   0
   3   0  15   -0.13    0.14   0
   3   0  16   34.25    0.22   0
   3   0  17    0.41    0.16   0
   3   1   8   80.86    0.24   0
   3   2   6   25.58    0.17   0
   3   4   4   60.50    0.24   0
   3   5   4  127.48    0.32   0
   3   6   4    4.72    0.17   0
   3   9   7   26.23    0.33   0
   3  10  10   18.85    0.39   0
   3  10  11   19.70    0.43   0
   3  10  12    2.79    0.29   0
   4   3  11    2.40    0.19   0
   4   3  12  185.64    0.45   0
   4   3  16   14.69    0.24   0
   4   3  17    5.71    0.26   0
   4   3  18    6.75    0.28   0
   4   4   9   77.02    0.32   0
   4   4  10   66.03    0.29   0
   4   4  18   74.61    0.42   0
   4   5   9   15.78    0.22   0
   4   5  19    0.33    0.29   0
   4   5  20    0.69    0.35   0
   4   6   9    7.53    0.22   0
   4   6  20    3.46    0.37   0
   4   7  10   27.55    0.30   0
   4   7  11   53.32    0.38   0
   4   7  12   52.19    0.35   0
   4   7  17    0.28    0.32   0
   4   7  18   11.02    0.40   0
   4   8  12    1.06    0.25   0
   4   8  13    1.53    0.30   0
   4   8  14    1.27    0.31   0
   4   8  15   18.68    0.38   0
   4   8  16    6.86    0.35   0
 -15  -5  -2    3.71    0.36   0
 -14  -6   0   15.40    0.35   0
 -14  -4  -4   -0.03    0.33   0
 -14   2 -10    8.21    0.36   0
 -13  -8   7    0.20    0.31   0
 -13  -4  -4    7.92    0.33   0
 -13  -2  -7    3.26    0.30   0
 -13  -1  -8   24.19    0.40   0
 -13   0  -9    0.28    0.26   0
 -13   2 -10   29.66    0.38   0
 -12  -8   8    1.72    0.33   0
 -12  -5  -2    7.13    0.30   0
 -12  -2  -7    0.52    0.21   0
 -12  -1  -8   60.27    0.49   0
 -12   0  -9    0.55    0.19   0
 -12   2 -10   18.13    0.34   0
 -11  -8   8   12.25    0.32   0
 -11  -7   4    0.39    0.28   0
 -11  -5  -2    0.92    0.18   0
 -11   2 -10   14.88    0.25   0
 -10  -8   9    4.70    0.27   0
 -10  -6   1    0.57    0.23   0
 -10  -3  -5    1.30    0.21   0
  -9  -8  11    0.34    0.21   0
  -9  -7   5   43.56    0.37   0
  -9  -5  -1    6.48    0.22   0
  -9  -4  -3   18.65    0.24   0
  -9   1  -9   18.12    0.22   0
  -8  -8  14   42.95    0.39   0
  -8  -7   6   16.70    0.25   0
  -8   0  -8    1.43    0.17   0
  -8   9  -9    2.50    0.09   0
  -7  -7   8   29.53    0.26   0
  -7  -4  -2   40.47    0.25   0
  -6  -7  10   29.24    0.22   0
  -6  -4  -1   24.60    0.19   0
  -6  -3  -3   18.18    0.18   0
  -6   0  -7   -0.16    0.12   0
  -5  -7  16   18.69    0.18   0
  -5  -7  17    3.47    0.13   0
  -5  -3  -2  382.24    0.51   0
  -5  10  -7   38.68    0.14   0
  -5  11  -6    0.43    0.12   0
  -4  -6   9   68.86    0.23   0
  -4  -3  -1   14.16    0.14   0
  -4   2  -7    1.75    0.07   0
  -3  -4   3   11.41    0.13   0
  -3   7  -7    5.68    0.05   0
  -3   9  -6   31.94    0.14   0
  -2  -4   5   66.02    0.15   0
  -2  -3   2  176.94    0.24   0
  -2   2  -5    6.93    0.05   0
  -2  11  -3    0.50    0.18   0
   0  -3  24    0.15    0.16   0
   0   9  -2    3.24    0.15   0
   0  10  -1   29.74    0.26   0
   1  -3  14   26.68    0.12   0
   1  -3  15    2.03    0.08   0
   1  -3  16   11.35    0.11   0
   1  -2  23    1.01    0.18   0
   1   8  -1    8.86    0.16   0
   1   9   0    6.01    0.16   0
   1  10   1   59.54    0.35   0
   1  11   3    0.52    0.25   0
   2  -1  22    5.75    0.22   0
   2   2   2    2.19    0.08   0
   2  10   4    1.31    0.23   0
   2  11   6   25.71    0.37   0
   3   0  18  322.95    0.59   0
   3   0  19    5.64    0.23   0
   3   2  24    0.10    0.32   0
   3   5   3    8.84    0.14   0
   3   7   4  117.45    0.36   0
   3   8   5    8.48    0.18   0
   3   9   6   30.41    0.32   0
   3  10   8   33.22    0.39   0
   3  10   9    2.92    0.29   0
   4   2  12   70.36    0.30   0
   4   2  13   44.08    0.27   0
   4   2  14   22.08    0.24   0
   4   2  15   21.98    0.25   0
   4   2  17    0.41    0.23   0
   4   3   9    4.45    0.16   0
   4   3  10  272.82    0.50   0
   4   3  19    0.66    0.27   0
   4   3  20   60.58    0.42   0
   4   4   8  125.77    0.37   0
   4   5   8    3.69    0.13   0
   4   6   8   58.65    0.32   0
   4   7   8    4.37    0.23   0
   4   7   9    1.48    0.16   0
   4   8  17   22.20    0.39   0
   4   9  14    0.45    0.32   0
   4   9  15    4.49    0.35   0
 -15  -6   1    0.89    0.39   0
 -15  -4  -3    0.89    0.33   0
 -15  -3  -5    0.20    0.31   0
 -15  -2  -6    5.65    0.37   0
 -15   1  -9    0.44    0.37   0
 -14  -7   4    4.04    0.38   0
 -14  -6   1    2.49    0.37   0
 -14  -3  -5    0.83    0.34   0
 -14   1  -9    0.99    0.28   0
 -14   3 -10    2.20    0.30   0
 -13  -8   8    1.10    0.37   0
 -13  -7   4    0.14    0.32   0
 -12  -7   4   -0.14    0.29   0
 -12  -6   1    5.77    0.31   0
 -12  -3  -5    2.06    0.27   0
 -11  -8   9   47.42    0.46   0
 -11  -6   1   77.22    0.52   0
 -11  -3  -5   -0.12    0.22   0
 -10  -8  10    0.68    0.24   0
 -10  -7   5   22.76    0.32   0
 -10  -5  -1   61.28    0.38   0
 -10   8 -10    4.50    0.16   0
  -9  -8  12    2.72    0.23   0
  -9  -7   6    9.82    0.26   0
  -9  -1  -7    0.09    0.20   0
  -9   0  -8    0.85    0.18   0
  -8  -8  15    2.40    0.19   0
  -8  -8  16   -0.03    0.21   0
  -8  -8  17    5.94    0.23   0
  -8  -6   3  121.88    0.41   0
  -8  -5   0   58.75    0.32   0
  -8  -3  -4   85.59    0.34   0
  -8   5 -10    2.66    0.14   0
  -8   6 -10   15.14    0.15   0
  -7  -6   4    2.66    0.17   0
  -7  -5   1   53.63    0.27   0
  -7  -2  -5  160.31    0.39   0
  -7   1  -8   41.55    0.21   0
  -6  -7  11    5.38    0.18   0
  -6  -6   5  126.55    0.35   0
  -6   4  -9   26.40    0.15   0
  -5  -6   7   17.95    0.16   0
  -5  -1  -5   74.05    0.23   0
  -5   1  -7    2.55    0.10   0
  -4  -1  -4  122.02    0.26   0
  -4   9  -7    0.14    0.07   0
  -3  -1  -3   66.68    0.17   0
  -3   2  -6   24.96    0.09   0
  -3  12  -3   -0.13    0.19   0
  -2  -2   0  199.66    0.24   0
  -2   7  -6   99.52    0.16   0
  -2   9  -5    4.98    0.12   0
  -1  -4  24   21.61    0.19   0
  -1   5  -5   60.65    0.11   0
  -1   6  -5    3.26    0.07   0
  -1  10  -3   11.59    0.18   0
  -1  12   0    7.30    0.26   0
   0  -4  15    2.39    0.06   0
   0  -4  16   22.56    0.10   0
   0  -4  17    3.34    0.08   0
   0   8  -3    1.64    0.13   0
   0  11   0    0.22    0.20   0
   0  12   2   15.20    0.31   0
   1  -3  13   53.30    0.14   0
   1  -3  17   14.40    0.13   0
   1  -3  18   22.31    0.16   0
   1   6  -2  403.78    0.46   0
   1  11   2   11.96    0.29   0
   1  12   4    7.50    0.29   0
   2  -2  15    0.05    0.11   0
   2  -2  16    0.28    0.11   0
   2  -1   8   79.20    0.17   0
   2  -1  23    3.62    0.25   0
   2   0   5    0.05    0.06   0
   2   3   1   88.74    0.21   0
   2   5   0   59.24    0.21   0
   2   6   0   47.65    0.20   0
   2   8   1   31.01    0.23   0
   2   9   2   91.61    0.39   0
   2  10   3    6.84    0.22   0
   2  11   5    0.12    0.27   0
   3   0  10  242.06    0.38   0
   3   0  20    0.68    0.20   0
   3   1   7   36.29    0.17   0
   3   1  23    1.51    0.26   0
   3   2   5  128.00    0.28   0
   3   3   4   36.04    0.16   0
   3   4   3    0.34    0.13   0
   3   6   3   45.24    0.22   0
   3   7   3  225.56    0.49   0
   3   8   4    0.94    0.20   0
   3   9   5    5.93    0.24   0
   3  10   7   13.29    0.33   0
   3  11  10   -0.01    0.36   0
   4   2  10  273.40    0.48   0
   4   3   8    0.34    0.14   0
   4   3  21   -0.34    0.29   0
   4   4   7    2.21    0.15   0
   4   5   7    2.21    0.13   0
   4   6   7    0.18    0.13   0
   4   7   7   21.43    0.28   0
   4   8   8   26.61    0.32   0
   4   9  10    2.87    0.28   0
   4   9  11   30.28    0.41   0
   4   9  13   13.39    0.31   0
 -16  -3  -4    0.56    0.39   0
 -15  -6   2    3.02    0.37   0
 -15  -5  -1    0.13    0.26   0
 -15  -1  -7    2.02    0.35   0
 -15   0  -8    2.77    0.31   0
 -14  -7   5   16.74    0.41   0
 -14  -5  -1    0.30    0.32   0
 -14  -4  -3   -0.36    0.32   0
 -14  -1  -7    4.82    0.34   0
 -14   0  -8   -0.11    0.30   0
 -13  -4  -3   24.49    0.39   0
 -13   0  -8    0.16    0.26   0
 -13   1  -9    3.24    0.30   0
 -13   3 -10   -0.19    0.25   0
 -12  -8  10    1.17    0.28   0
 -12  -7   5    5.44    0.32   0
 -12  -2  -6  136.92    0.53   0
 -12   1  -9   10.61    0.27   0
 -12   3 -10  106.78    0.45   0
 -11  -8  10    4.20    0.29   0
 -11  -7   5    3.34    0.29   0
 -11  -6   2    1.48    0.27   0
 -11  -5  -1   10.65    0.23   0
 -11  -4  -3   20.87    0.31   0
 -11  -2  -6    6.81    0.25   0
 -11   0  -8   54.00    0.44   0
 -11   1  -9    1.26    0.22   0
 -11   3 -10  224.40    0.59   0
 -10  -8  11   10.77    0.28   0
 -10  -7   6   29.85    0.35   0
 -10  -6   2   -0.05    0.22   0
 -10  -1  -7   13.86    0.25   0
 -10   0  -8   42.72    0.31   0
  -9  -8  13   21.86    0.33   0
  -9  -8  14    5.74    0.28   0
  -9  -5   0   64.52    0.34   0
  -9  -3  -4   70.38    0.33   0
  -9   4 -10    0.10    0.15   0
  -9   7 -10   22.34    0.18   0
  -8   2  -9   12.38    0.17   0
  -7  -7   9   47.19    0.28   0
  -7  -3  -3    0.11    0.15   0
  -7  -1  -6  103.21    0.32   0
  -7   3  -9    0.63    0.11   0
  -7   8  -9    1.38    0.09   0
  -6  -7  12   46.18    0.29   0
  -6  -2  -4   45.04    0.22   0
  -6   2  -8   38.13    0.18   0
  -6   5  -9    1.03    0.10   0
  -6   6  -9   35.78    0.13   0
  -5   3  -8    0.17    0.08   0
  -4  -6  10  356.87    0.45   0
  -4  -5   5   72.58    0.22   0
  -4   0  -5    0.01    0.09   0
  -4   1  -6   65.31    0.18   0
  -2  -5  23    2.79    0.09   0
  -2  12  -2   15.96    0.24   0
  -1   9  -4  183.25    0.36   0
  -1  11  -2   12.89    0.21   0
   0  -4  14   16.53    0.07   0
   0  -4  18    9.65    0.10   0
   0   3  -3   31.53    0.07   0
   0  12   1    1.59    0.24   0
   1  -3  19    0.55    0.12   0
   1  -2   7   10.60    0.05   0
   1   7  -2   12.64    0.13   0
   2  -2  13    4.32    0.11   0
   2  -2  14    6.04    0.10   0
   2  -2  17   81.69    0.25   0
   2  -2  18   48.47    0.23   0
   2   1   3   66.54    0.16   0
   2   7   0   79.29    0.27   0
   2  11   4   52.16    0.41   0
   3   0   9    0.13    0.10   0
   3   0  21    0.00    0.20   0
   3   8   3    0.94    0.19   0
   3   9   4   36.18    0.30   0
   3  10   6    0.04    0.27   0
   3  11   8    0.08    0.30   0
   3  11   9   -0.13    0.31   0
   4   1  14   11.48    0.19   0
   4   1  15    7.79    0.19   0
   4   1  16   60.25    0.31   0
   4   2   9    4.22    0.14   0
   4   2  20    1.98    0.24   0
   4   2  21    8.84    0.31   0
   4   3  22    0.12    0.28   0
   4   4   6   12.46    0.16   0
   4   5   6    0.51    0.15   0
   4   6   6   14.37    0.17   0
   4   7   6   18.91    0.25   0
   4   8   7    6.41    0.25   0
   4   9   9   11.81    0.33   0
   4  10  12   17.74    0.44   0
   4  10  13   16.29    0.46   0
   5   5  13   11.30    0.26   0
   5   5  15    1.81    0.27   0
   5   5  16    8.58    0.32   0
   5   5  17    3.54    0.30   0
   5   6  12   28.20    0.32   0
   5   6  15    0.99    0.28   0
   5   6  16    0.61    0.30   0
   5   6  17    2.03    0.36   0
   5   7  14    7.98    0.28   0
 -15  -5   0   -0.17    0.34   0
 -15  -4  -2    2.99    0.33   0
 -15  -3  -4    2.02    0.32   0
 -14  -3  -4    0.84    0.31   0
 -13  -6   2   23.62    0.46   0
 -12  -8  11    5.95    0.29   0
 -12  -6   2    1.14    0.27   0
 -12  -1  -7    0.23    0.24   0
 -12   0  -8   21.22    0.31   0
 -12   4 -10    1.51    0.20   0
 -11  -8  11    0.88    0.26   0
 -11  -3  -4   -0.29    0.20   0
 -11  -1  -7    5.06    0.18   0
 -11   4 -10   32.13    0.27   0
 -10  -8  12    9.81    0.26   0
 -10  -8  13    0.45    0.23   0
 -10  -5   0   27.90    0.30   0
 -10  -3  -4   93.69    0.41   0
 -10   4 -10   40.53    0.27   0
  -9  -8  15    0.37    0.24   0
  -9  -8  16    1.74    0.25   0
  -9  -7   7    6.06    0.24   0
  -9  -6   3    1.06    0.16   0
  -9  -4  -2   20.10    0.21   0
  -9   2  -9    3.94    0.15   0
  -9   5 -10   39.19    0.21   0
  -9   6 -10   49.22    0.23   0
  -8  -6   4   40.20    0.28   0
  -8  -5   1    7.32    0.21   0
  -8  -2  -5    1.46    0.12   0
  -8   1  -8   28.86    0.20   0
  -7  -7  10   29.26    0.28   0
  -7  -6   5    3.55    0.18   0
  -7  -4  -1   33.03    0.20   0
  -6  -6   6   13.63    0.17   0
  -6  -4   0  123.48    0.33   0
  -6  -3  -2   10.93    0.16   0
  -5  -6   8   34.65    0.20   0
  -5  -4   1   12.17    0.15   0
  -5  -2  -3    3.48    0.13   0
  -4  -4   2  395.78    0.46   0
  -3  -3   1   46.10    0.16   0
  -3   0  -4   23.98    0.11   0
  -3   1  -5   34.97    0.12   0
  -2  -5  11    2.47    0.06   0
  -2   1  -4  369.33    0.25   0
  -1   7  -5   51.05    0.15   0
  -1  12  -1   28.25    0.33   0
   0  -4  19   55.73    0.17   0
   0  10  -2   67.45    0.33   0
   1  -3  12   43.05    0.12   0
   1  -3  20    9.04    0.15   0
   1  -2  25   50.16    0.34   0
   1   0   2   71.30    0.10   0
   1   4  -2    0.98    0.06   0
   1   9  -1   40.99    0.23   0
   1  10   0   48.25    0.31   0
   1  11   1   21.31    0.28   0
   1  12   3    7.23    0.31   0
   2  -2  12  247.12    0.32   0
   2  -2  20  169.90    0.41   0
   2  -1  24   13.67    0.27   0
   2   4   0   36.87    0.16   0
   2   8   0   95.23    0.34   0
   2   9   1   31.70    0.26   0
   2  10   2   14.56    0.25   0
   2  12   6    2.86    0.37   0
   3  -1  15   23.71    0.18   0
   3  -1  16   15.13    0.17   0
   3  -1  17   11.75    0.18   0
   3   0  22    0.73    0.22   0
   3   0  23   -0.16    0.24   0
   3   1   6   25.60    0.15   0
   3   3   3   41.81    0.18   0
   3   6   2   14.25    0.14   0
   3   7   2   14.69    0.20   0
   3  10   5    2.20    0.27   0
   3  11   7    0.53    0.30   0
   4   1  12  273.98    0.48   0
   4   1  18   11.15    0.24   0
   4   1  19   11.32    0.24   0
   4   2  22    0.46    0.31   0
   4   3   7    0.10    0.10   0
   4   5   5    0.71    0.15   0
   4   6   5   55.24    0.28   0
   4   7   5   20.07    0.25   0
   4   8   6   31.30    0.31   0
   4   9   8    4.89    0.22   0
   4  10   9   35.15    0.42   0
   4  10  10    3.12    0.36   0
   4  10  11   10.95    0.33   0
   5   4  12    2.81    0.22   0
   5   4  13   44.57    0.33   0
   5   4  14   13.89    0.21   0
   5   4  15   27.79    0.26   0
   5   4  16    7.45    0.27   0
   5   4  18   77.82    0.46   0
   5   4  19   -0.33    0.28   0
   5   5  10   12.42    0.21   0
   5   5  11    4.91    0.22   0
   5   5  12   26.03    0.24   0
   5   5  18   53.75    0.41   0
   5   5  19   16.59    0.40   0
   5   5  20   17.92    0.39   0
   5   6  10   17.69    0.26   0
   5   6  11    6.52    0.24   0
   5   6  18    5.44    0.28   0
   5   6  19    0.20    0.37   0
   5   7  11   66.07    0.41   0
   5   7  12    0.24    0.26   0
   5   7  13    0.18    0.20   0
   5   7  16   18.32    0.33   0
   5   7  17    8.51    0.30   0
   5   7  18    8.50    0.41   0
   5   8  12    0.44    0.27   0
   5   8  13   92.44    0.53   0
   5   8  14    2.21    0.32   0
   5   8  15    0.37    0.33   0
   5   8  16   21.56    0.43   0
   5   8  17    0.02    0.38   0
 -16  -3  -3    0.68    0.38   0
 -15  -6   3    2.98    0.41   0
 -15  -1  -6   11.76    0.41   0
 -15   0  -7    0.25    0.31   0
 -14  -7   6    0.44    0.32   0
 -14  -6   3    1.72    0.38   0
 -14  -5   0   15.77    0.37   0
 -14  -2  -5   -0.08    0.31   0
 -14   1  -8   18.12    0.35   0
 -13  -7   6    2.78    0.32   0
 -13  -6   3    2.07    0.28   0
 -13  -4  -2   12.62    0.36   0
 -13  -3  -4   12.42    0.28   0
 -13   2  -9    3.51    0.29   0
 -12  -7   6    3.61    0.29   0
 -12  -5   0   11.90    0.33   0
 -12  -4  -2   98.24    0.47   0
 -12   2  -9   26.89    0.30   0
 -12   6 -10    0.10    0.21   0
 -11  -8  12    5.15    0.29   0
 -11  -8  13    5.99    0.31   0
 -11  -6   3    8.55    0.28   0
 -11  -5   0    0.76    0.19   0
 -11   5 -10   46.21    0.32   0
 -11   6 -10    0.02    0.19   0
 -11   7 -10    5.77    0.24   0
 -10  -8  14    4.91    0.27   0
 -10  -7   7   80.05    0.45   0
 -10  -6   3   51.25    0.33   0
 -10  -4  -2    2.57    0.16   0
 -10  -2  -5    4.77    0.22   0
 -10   2  -9    1.48    0.18   0
 -10   5 -10   46.27    0.26   0
 -10   6 -10    5.79    0.18   0
  -9  -7   8    4.07    0.22   0
  -9  -5   1   66.75    0.39   0
  -9  -2  -5   13.19    0.18   0
  -9   1  -8   47.80    0.27   0
  -8  -7   9   29.49    0.26   0
  -8  -4  -1   59.55    0.29   0
  -8  -3  -3    6.45    0.18   0
  -8   0  -7    0.74    0.16   0
  -8   3  -9    1.75    0.12   0
  -7  -2  -4   33.36    0.21   0
  -7   4  -9   12.47    0.15   0
  -6  -7  13   20.02    0.21   0
  -6  -5   3   58.50    0.25   0
  -6  -1  -5    0.71    0.12   0
  -6   0  -6  258.70    0.42   0
  -6   1  -7  162.83    0.32   0
  -5  -5   4  128.45    0.30   0
  -5  -3  -1    4.31    0.13   0
  -4  -6  11   16.66    0.14   0
  -4  -3   0   29.25    0.16   0
  -4  -2  -2  371.55    0.43   0
  -3  -4   4   46.84    0.17   0
  -3  -2  -1   55.19    0.15   0
  -1  -1   0  804.43    0.31   0
   0  -4  20    7.45    0.12   0
   0   6  -4   51.39    0.15   0
   0   9  -3   -0.05    0.14   0
   0  11  -1    7.35    0.21   0
   0  12   0   11.19    0.29   0
   1  -3  21    0.62    0.14   0
   1   8  -2    0.58    0.11   0
   1  12   2   10.49    0.31   0
   2  -2  21    1.28    0.18   0
   2  -1   7   78.27    0.16   0
   2  11   3    0.44    0.26   0
   2  12   5   10.16    0.37   0
   3  -1  13    0.07    0.10   0
   3  -1  14   59.13    0.22   0
   3  -1  18   15.84    0.19   0
   3   0   8  183.67    0.30   0
   3   0  24   45.22    0.44   0
   3   2   4   14.00    0.11   0
   3   4   2   62.29    0.22   0
   3   8   2   13.67    0.21   0
   3   9   3   15.99    0.25   0
   3  10   4   20.07    0.29   0
   3  11   6    7.23    0.32   0
   4   1  10   21.02    0.17   0
   4   1  11   14.57    0.16   0
   4   1  20   18.21    0.28   0
   4   2   8  133.12    0.31   0
   4   2  23    0.41    0.32   0
   4   3   6   82.44    0.27   0
   4   4   5    3.68    0.14   0
   4   8   5   24.07    0.28   0
   4   9   6   64.74    0.41   0
   4  10   8   28.75    0.39   0
   5   3  12   10.89    0.22   0
   5   3  15    4.39    0.21   0
   5   3  16  119.94    0.47   0
   5   3  17   24.56    0.32   0
   5   3  18   13.89    0.31   0
   5   3  19    5.73    0.28   0
   5   4  10    2.83    0.19   0
   5   4  11    9.38    0.17   0
   5   5   9   23.46    0.25   0
   5   5  21    3.07    0.39   0
   5   6   9    5.94    0.23   0
   5   7   9   78.62    0.40   0
   5   7  10   11.97    0.23   0
   5   8  10    2.14    0.28   0
   5   8  11    6.78    0.30   0
   5   9  12    0.01    0.32   0
   5   9  14   35.09    0.48   0
   5   9  15    2.00    0.40   0
 -16  -4  -1    0.57    0.27   0
 -16  -2  -4   39.62    0.59   0
 -15  -6   4   27.89    0.48   0
 -15  -5   1    3.62    0.36   0
 -15  -4  -1    1.42    0.33   0
 -15  -3  -3    3.28    0.33   0
 -14  -7   7    2.49    0.36   0
 -14  -5   1    0.65    0.29   0
 -14  -3  -3   36.87    0.45   0
 -14   0  -7   -0.09    0.30   0
 -13  -7   7    1.16    0.30   0
 -13  -2  -5    0.39    0.20   0
 -13  -1  -6    0.09    0.27   0
 -13   0  -7   -0.11    0.27   0
 -13   1  -8   28.82    0.38   0
 -13   3  -9    2.83    0.27   0
 -12  -7   7   11.81    0.33   0
 -12  -1  -6   35.13    0.33   0
 -12   1  -8   90.75    0.42   0
 -11  -8  14    4.04    0.31   0
 -11  -2  -5    0.80    0.17   0
 -11   1  -8   84.54    0.38   0
 -10  -8  15   -0.03    0.22   0
 -10  -7   8   23.70    0.30   0
 -10  -6   4   23.79    0.29   0
 -10  -5   1    8.22    0.25   0
 -10  -1  -6   18.17    0.25   0
 -10   0  -7    0.87    0.19   0
 -10   1  -8    2.63    0.20   0
  -9  -4  -1   26.58    0.25   0
  -9  -3  -3   42.05    0.28   0
  -9  -1  -6   74.50    0.31   0
  -9   0  -7    0.29    0.18   0
  -9   3  -9    9.33    0.16   0
  -9   9  -9    6.94    0.14   0
  -8  -7  10   36.14    0.32   0
  -8  -6   5   10.36    0.20   0
  -8  -5   2  100.78    0.37   0
  -7  -7  11   72.28    0.35   0
  -7  -6   6   27.17    0.22   0
  -7  -4   0   65.78    0.28   0
  -7   2  -8  143.21    0.32   0
  -6  -7  14    7.23    0.16   0
  -6  -7  15    8.21    0.17   0
  -6  -6   7   37.22    0.21   0
  -5  -6   9    2.99    0.13   0
  -5  -1  -4    4.39    0.13   0
  -5   4  -8  138.46    0.23   0
  -4  -5   6  275.56    0.39   0
  -3  -5   8   96.80    0.20   0
  -3  11  -5    0.42    0.14   0
  -3  12  -4    2.15    0.18   0
  -2  -4   6   21.91    0.10   0
  -2   8  -6    0.05    0.08   0
  -2  11  -4   51.95    0.26   0
  -1   8  -5   38.36    0.15   0
  -1  11  -3    0.47    0.17   0
   0  -4  13   66.45    0.08   0
   0   5  -4    6.69    0.07   0
   0   7  -4   63.87    0.18   0
   1  -3  22    0.37    0.14   0
   1  10  -1    5.63    0.19   0
   1  11   0   42.68    0.35   0
   2  -2  11   86.79    0.19   0
   2  -2  22   56.02    0.30   0
   2   5  -1   26.09    0.15   0
   2   7  -1    5.04    0.13   0
   2   9   0   19.66    0.21   0
   2  10   1   14.31    0.24   0
   2  11   2    1.27    0.25   0
   2  12   4    5.02    0.32   0
   3  -1  12  239.90    0.36   0
   3  -1  20   59.51    0.30   0
   3   6   1  115.60    0.31   0
   3   7   1    0.78    0.15   0
   4   1  22    0.55    0.25   0
   4   5   4   84.34    0.30   0
   4   6   4    6.68    0.14   0
   4   7   4  149.41    0.44   0
   4   9   5    2.22    0.22   0
   4  10   7    2.24    0.30   0
   4  11   9    1.29    0.36   0
   5   2  15    0.14    0.19   0
   5   2  16   82.49    0.37   0
   5   3  11   25.79    0.25   0
   5   3  20   23.74    0.37   0
   5   3  21    0.82    0.27   0
   5   4   9    2.78    0.19   0
   5   5   8   15.60    0.22   0
   5   6   8   36.77    0.29   0
   5   7   8    2.65    0.23   0
   5   8   9    0.02    0.27   0
   5   9  10    4.42    0.32   0
   5   9  11    3.59    0.34   0
 -16  -4   0    4.13    0.38   0
 -16  -3  -2    4.75    0.41   0
 -16   0  -6    0.79    0.37   0
 -15  -2  -4    6.99    0.40   0
 -15  -1  -5    0.36    0.31   0
 -15   1  -7    2.32    0.28   0
 -14  -7   8    3.36    0.35   0
 -14  -6   4   30.94    0.51   0
 -14  -2  -4    7.03    0.32   0
 -14   2  -8    2.76    0.32   0
 -14   4  -9    7.86    0.31   0
 -13  -7   8   28.79    0.45   0
 -13  -6   4   14.48    0.35   0
 -13  -5   1    0.01    0.20   0
 -13  -4  -1    6.79    0.30   0
 -13  -3  -3    0.43    0.24   0
 -12  -7   8   25.48    0.42   0
 -12  -6   4   25.65    0.36   0
 -12  -4  -1    2.27    0.26   0
 -12  -3  -3    1.21    0.24   0
 -12   0  -7   -0.02    0.16   0
 -12   3  -9    1.60    0.22   0
 -11  -7   8   20.05    0.34   0
 -11  -6   4   90.52    0.56   0
 -11  -5   1   10.31    0.22   0
 -11  -4  -1    6.89    0.24   0
 -11  -3  -3    5.17    0.23   0
 -11   0  -7    0.11    0.21   0
 -11   3  -9   11.91    0.22   0
 -10  -4  -1    5.33    0.22   0
 -10  -3  -3    1.14    0.14   0
 -10   3  -9   -0.21    0.16   0
  -9  -7   9   10.05    0.24   0
  -9  -6   5   20.94    0.27   0
  -8  -2  -4    0.72    0.16   0
  -8   2  -8   77.42    0.30   0
  -8   4  -9    1.77    0.14   0
  -7  -7  12   14.56    0.21   0
  -7  -1  -5   20.20    0.18   0
  -7   0  -6  827.81    0.77   0
  -7   1  -7    6.84    0.13   0
  -7   5  -9    3.52    0.12   0
  -7   7  -9   32.56    0.14   0
  -6  -7  16   14.54    0.20   0
  -6  -7  17    6.77    0.18   0
  -6  -4   1  121.59    0.32   0
  -6  -2  -3  304.25    0.46   0
  -6   3  -8    0.88    0.10   0
  -5  -5   5    1.88    0.12   0
  -4  -6  12    1.06    0.10   0
  -4  -4   3   44.27    0.18   0
  -3  10  -6    0.10    0.10   0
  -2  -3   3   10.38    0.07   0
  -2  10  -5   13.78    0.14   0
  -1  10  -4    3.41    0.14   0
  -1  12  -2   10.16    0.25   0
   0  -4  21    0.68    0.11   0
   0   8  -4   65.89    0.22   0
   1  -3  11   35.87    0.09   0
   1   6  -3    5.84    0.10   0
   1   9  -2   13.08    0.16   0
   1  12   1   26.76    0.34   0
   2  -2  23    6.20    0.23   0
   2   0   4  812.57    0.45   0
   2   3   0   41.04    0.14   0
   2   8  -1  111.74    0.33   0
   2  12   3   26.09    0.39   0
   3  -1  11    6.36    0.11   0
   3  -1  21    0.60    0.20   0
   3  -1  22   13.25    0.27   0
   3   0   7    0.15    0.08   0
   3   1   5   33.78    0.14   0
   3   3   2    1.63    0.11   0
   3   5   1    1.06    0.09   0
   3   8   1   84.99    0.33   0
   3   9   2   51.82    0.32   0
   3  10   3    3.35    0.22   0
   3  11   4   38.94    0.40   0
   4   0  13   -0.17    0.12   0
   4   0  14   13.98    0.17   0
   4   0  15    0.14    0.15   0
   4   0  16  113.30    0.35   0
   4   0  17    1.35    0.17   0
   4   0  18    2.96    0.18   0
   4   0  19    0.18    0.19   0
   4   1   9   37.30    0.20   0
   4   1  23   -0.19    0.26   0
   4   3   5   11.06    0.15   0
   4   4   4    8.76    0.15   0
   4   6   3  121.88    0.36   0
   4   7   3   59.13    0.30   0
   4   8   4   52.18    0.29   0
   4  10   6   37.62    0.39   0
   4  11   8    4.97    0.36   0
   5   2  12   10.72    0.21   0
   5   2  13  210.90    0.50   0
   5   2  14   44.10    0.29   0
   5   2  18   60.11    0.37   0
   5   2  20    3.23    0.30   0
   5   3   9   64.29    0.28   0
   5   3  10   94.34    0.32   0
   5   3  22    0.22    0.32   0
   5   4   8  147.57    0.40   0
   5   5   7    8.71    0.19   0
   5   6   7    6.66    0.17   0
   5   7   7  105.37    0.44   0
   5   8   7   23.09    0.29   0
   5   8   8   21.05    0.27   0
   5   9   9    3.74    0.32   0
   5  10  11    8.43    0.38   0
   5  10  12    0.58    0.35   0
   6   6  14   13.59    0.30   0
   6   6  15   31.70    0.39   0
   6   6  17    2.60    0.32   0
   6   7  15    1.99    0.31   0
   6   7  16   11.73    0.36   0
   6   7  17   -0.09    0.33   0
 -16  -2  -3    6.85    0.43   0
 -15  -6   5    6.63    0.37   0
 -15  -4   0    0.29    0.32   0
 -14  -6   5    3.32    0.35   0
 -14  -3  -2    0.06    0.26   0
 -14  -1  -5    1.74    0.31   0
 -14   0  -6   17.70    0.37   0
 -14   1  -7    4.65    0.30   0
 -13  -7   9    1.34    0.29   0
 -13  -5   2    3.26    0.29   0
 -13   2  -8    0.91    0.26   0
 -13   4  -9    0.48    0.23   0
 -12  -7   9   30.33    0.43   0
 -12   2  -8   68.31    0.42   0
 -12   4  -9   22.37    0.30   0
 -11  -6   5    0.48    0.22   0
 -10  -7   9   30.76    0.34   0
 -10  -6   5    2.87    0.22   0
 -10  -5   2   76.69    0.37   0
 -10  -2  -4  118.67    0.41   0
  -9  -7  10   87.60    0.42   0
  -9  -5   2  104.96    0.39   0
  -9  -2  -4   84.53    0.34   0
  -9   2  -8    0.50    0.15   0
  -9   4  -9    8.51    0.18   0
  -8  -7  11    1.84    0.18   0
  -8  -6   6   91.96    0.37   0
  -8  -3  -2   91.93    0.33   0
  -8  -1  -5    6.94    0.17   0
  -8   8  -9    0.80    0.11   0
  -7  -7  13   16.44    0.22   0
  -7  -6   7   10.56    0.18   0
  -7   6  -9   22.03    0.14   0
  -6  -7  18   41.56    0.27   0
  -6  -7  19    0.07    0.13   0
  -6  -6   8   18.76    0.17   0
  -6  -5   4    2.41    0.13   0
  -6  -3  -1   57.01    0.24   0
  -5  -6  10   28.79    0.19   0
  -5  -4   2  333.37    0.44   0
  -5   0  -5    0.33    0.08   0
  -5   1  -6   11.85    0.12   0
  -4  -1  -3    4.35    0.10   0
  -4  11  -6   29.98    0.17   0
  -3   8  -7   12.36    0.07   0
  -2  -5  12   29.79    0.09   0
  -1  -4   9   18.12    0.06   0
  -1  -3   5   14.54    0.06   0
   0  -4  22    6.08    0.13   0
   0  10  -3    0.31    0.14   0
   0  11  -2   75.26    0.35   0
   0  12  -1    0.92    0.22   0
   1  -3  23    0.53    0.14   0
   1   2  -1   13.05    0.07   0
   1   7  -3    3.16    0.10   0
   2  -2  10  259.46    0.29   0
   2   4  -1    8.96    0.10   0
   2  10   0   64.63    0.34   0
   2  11   1   26.92    0.31   0
   3  -1  23    1.45    0.25   0
   3   2   3    5.42    0.10   0
   3   4   1  114.62    0.27   0
   3  10   2    0.76    0.21   0
   3  12   5    8.25    0.37   0
   4   0  12    8.77    0.14   0
   4   0  20   13.23    0.24   0
   4   0  21    0.95    0.23   0
   4   1   8   24.69    0.17   0
   4   2   6  165.79    0.34   0
   4   5   3    9.41    0.16   0
   4   8   3   21.87    0.25   0
   4   9   4   99.44    0.45   0
   4  10   5    0.40    0.27   0
   4  11   7    0.12    0.29   0
   5   2  11   29.03    0.23   0
   5   2  21    2.66    0.29   0
   5   4   7  114.80    0.35   0
   5   5   6   19.51    0.22   0
   5   6   6    0.07    0.19   0
   5   7   6   42.52    0.33   0
   5   8   6   87.96    0.41   0
   5   9   7    9.77    0.29   0
   5   9   8    5.98    0.25   0
   5  10   9    3.57    0.36   0
   6   4  14   18.62    0.27   0
   6   4  16   47.85    0.38   0
   6   4  17    0.51    0.28   0
   6   5  12    0.42    0.22   0
   6   5  13    5.30    0.27   0
   6   5  14   28.71    0.30   0
   6   5  16   51.14    0.38   0
   6   5  18   26.99    0.43   0
   6   5  19    0.22    0.35   0
   6   5  20    6.77    0.36   0
   6   6  11   52.79    0.37   0
   6   6  12   35.55    0.35   0
   6   6  13    1.50    0.20   0
   6   6  18   78.10    0.54   0
   6   6  19    0.75    0.36   0
   6   7  11   -0.22    0.26   0
   6   7  12    2.88    0.27   0
   6   7  13   31.31    0.33   0
   6   8  12   11.34    0.32   0
   6   8  13    0.17    0.32   0
   6   8  14    1.81    0.33   0
   6   8  15   14.87    0.42   0
   6   8  16   13.11    0.40   0
 -16  -4   1    0.62    0.37   0
 -16  -1  -4    0.44    0.36   0
 -16   0  -5   -0.03    0.35   0
 -15  -6   6    6.16    0.43   0
 -15   2  -7    0.10    0.29   0
 -14   3  -8   -0.30    0.28   0
 -13  -6   5    0.40    0.22   0
 -13  -1  -5    4.92    0.28   0
 -13   5  -9   11.52    0.28   0
 -12  -6   5    1.31    0.26   0
 -12  -5   2    4.90    0.22   0
 -12  -3  -2    1.68    0.25   0
 -12  -1  -5    9.45    0.25   0
 -12   1  -7    0.11    0.22   0
 -12   5  -9    4.38    0.24   0
 -11  -7  10    5.95    0.28   0
 -11  -5   2   68.46    0.38   0
 -11  -3  -2   83.39    0.39   0
 -11  -1  -5   -0.14    0.19   0
 -11   2  -8  230.46    0.65   0
 -11   4  -9   -0.02    0.20   0
 -10  -7  10   37.56    0.35   0
 -10  -4   0   28.05    0.26   0
 -10  -3  -2  104.62    0.38   0
 -10  -1  -5    0.40    0.19   0
 -10   4  -9    0.36    0.16   0
  -9  -6   6   19.33    0.24   0
  -9  -4   0   15.18    0.19   0
  -9  -3  -2   37.14    0.26   0
  -9   1  -7    0.25    0.16   0
  -9   8  -9   16.88    0.18   0
  -8  -5   3   38.91    0.27   0
  -8   0  -6  372.68    0.58   0
  -8   5  -9   37.88    0.20   0
  -7  -7  14    5.32    0.19   0
  -7  -2  -3   80.52    0.28   0
  -7   3  -8   26.87    0.16   0
  -6  -1  -4   71.10    0.24   0
  -6   2  -7   10.20    0.13   0
  -6   9  -8    2.25    0.06   0
  -5  -3   0    2.45    0.13   0
  -5  -2  -2   24.93    0.14   0
  -5   5  -8   13.97    0.09   0
  -4  -6  13   22.55    0.15   0
  -4  -5   7   32.03    0.15   0
  -4   2  -6  161.17    0.24   0
  -3  -5   9    5.18    0.09   0
  -3  -1  -2   36.41    0.13   0
  -2  -1  -1  938.15    0.44   0
  -1   4  -5  200.40    0.11   0
   0   9  -4  109.19    0.30   0
   1  -3  24    5.28    0.17   0
   1   3  -2   24.36    0.09   0
   1   5  -3    0.35    0.07   0
   1   8  -3   24.40    0.16   0
   1  10  -2   24.65    0.24   0
   1  11  -1    1.55    0.20   0
   1  12   0    7.21    0.28   0
   2  -2  24   11.22    0.22   0
   2  -1   6  107.21    0.17   0
   2   1   2  106.91    0.17   0
   2   9  -1    9.43    0.17   0
   2  12   2   14.74    0.31   0
   3  -1  10    5.18    0.10   0
   3  -1  24    7.26    0.27   0
   3   6   0   28.92    0.19   0
   3   7   0    1.19    0.13   0
   3   9   1    1.45    0.18   0
   3  11   3   10.23    0.31   0
   4   0  11   -0.12    0.12   0
   4   0  22   46.63    0.33   0
   4   3   4  347.50    0.47   0
   4   4   3    0.04    0.13   0
   4   6   2    3.55    0.14   0
   4   7   2  155.62    0.42   0
   4   9   3   11.93    0.25   0
   4  10   4    1.02    0.25   0
   5   1  14   43.11    0.26   0
   5   1  15    6.50    0.20   0
   5   1  16    3.60    0.21   0
   5   1  17    3.15    0.22   0
   5   1  18    0.18    0.20   0
   5   1  19    8.47    0.25   0
   5   2  10   44.63    0.24   0
   5   2  23    3.30    0.34   0
   5   3   8    0.03    0.10   0
   5   4   6    2.00    0.14   0
   5   6   5  112.34    0.38   0
   5   7   5  100.33    0.39   0
   5   9   6   13.49    0.29   0
   5  10   8    2.96    0.33   0
   6   4  12   43.77    0.32   0
   6   4  13    4.63    0.23   0
   6   4  18   34.16    0.34   0
   6   4  19    2.44    0.31   0
   6   4  20   58.51    0.48   0
   6   5  10  174.80    0.51   0
   6   5  11    1.73    0.20   0
   6   6  10   37.24    0.32   0
   6   7  10    6.18    0.28   0
   6   8  10   29.32    0.36   0
   6   8  11   18.16    0.37   0
   6   9  12   16.28    0.39   0
   6   9  13   23.12    0.47   0
   6   9  14   27.37    0.50   0
 -15  -6   7    0.29    0.33   0
 -15  -4   1    0.13    0.32   0
 -15  -3  -1   15.18    0.42   0
 -15  -1  -4   55.85    0.57   0
 -15   0  -5   -0.00    0.30   0
 -14  -6   6    8.06    0.35   0
 -14  -5   3    7.98    0.34   0
 -14   2  -7    0.32    0.25   0
 -13  -7  10   19.29    0.38   0
 -13  -6   6   34.04    0.49   0
 -13  -2  -3   -0.12    0.24   0
 -13   3  -8   99.93    0.47   0
 -12  -7  10    2.79    0.28   0
 -12  -6   6   70.13    0.59   0
 -12  -5   3    3.88    0.26   0
 -11  -6   6    8.71    0.27   0
 -11   0  -6  162.31    0.52   0
 -11   1  -7    5.33    0.21   0
 -10  -7  11    2.76    0.23   0
 -10  -6   6    4.19    0.23   0
 -10  -5   3   13.66    0.27   0
 -10   0  -6    0.20    0.19   0
 -10   5  -9   10.95    0.20   0
  -9  -7  12    0.43    0.20   0
  -9  -5   3   45.95    0.31   0
  -9   0  -6    4.66    0.15   0
  -9   5  -9   18.93    0.17   0
  -8  -7  13   54.78    0.39   0
  -8  -6   7    1.77    0.18   0
  -8  -4   1   43.28    0.29   0
  -8  -2  -3    3.59    0.16   0
  -8   3  -8   80.17    0.29   0
  -8   6  -9    2.35    0.12   0
  -8   7  -9    4.92    0.12   0
  -7  -7  15    8.67    0.20   0
  -7  -6   8    3.88    0.15   0
  -7  -5   4    3.17    0.16   0
  -7  -3  -1    7.84    0.15   0
  -6  -4   2   71.58    0.25   0
  -6   0  -5    0.43    0.12   0
  -6   1  -6   35.54    0.17   0
  -6   4  -8  105.88    0.24   0
  -5  -5   6  252.89    0.40   0
  -4  -6  14    5.74    0.12   0
  -4  -3   1    5.81    0.09   0
  -4  -2  -1    2.10    0.10   0
  -4   0  -4  434.92    0.41   0
  -3  -4   5   14.96    0.11   0
  -3  -2   0   17.47    0.11   0
  -3   3  -6  119.15    0.15   0
  -2  -2   1  508.84    0.35   0
  -2   9  -6   13.25    0.11   0
  -1  12  -3    7.47    0.22   0
   0  -4  23    2.88    0.12   0
   0   4  -4   29.79    0.09   0
   1   9  -3   21.44    0.19   0
   2   6  -2   88.90    0.23   0
   2   7  -2   27.25    0.17   0
   2  11   0    0.91    0.24   0
   3   1   4  473.97    0.43   0
   3   5   0   52.79    0.20   0
   3   8   0   19.09    0.21   0
   3  10   1   20.18    0.26   0
   3  11   2   35.25    0.35   0
   3  12   4    1.46    0.29   0
   4   0  10  873.06    0.70   0
   4   0  23    0.74    0.24   0
   4   1   7   72.20    0.23   0
   4   2   5   22.85    0.16   0
   4   5   2  252.13    0.44   0
   4   8   2   15.08    0.23   0
   4  11   5    0.13    0.28   0
   5   1  12   26.77    0.21   0
   5   1  13   18.43    0.21   0
   5   1  20   17.77    0.29   0
   5   1  21    2.70    0.27   0
   5   2   9    6.80    0.16   0
   5   3   7   18.27    0.18   0
   5   5   5   21.60    0.21   0
   5   8   5  123.12    0.46   0
   5  10   7   35.70    0.41   0
   5  11   8    2.04    0.32   0
   6   3  13   13.00    0.24   0
   6   3  14  235.77    0.59   0
   6   3  16    0.50    0.23   0
   6   3  17    4.41    0.26   0
   6   3  18    0.76    0.27   0
   6   3  19    0.63    0.29   0
   6   3  20    0.30    0.26   0
   6   4  10    1.02    0.19   0
   6   4  11   32.68    0.25   0
   6   4  21   -0.15    0.30   0
   6   6   8   80.86    0.37   0
   6   6   9   31.91    0.25   0
   6   7   8    0.94    0.23   0
   6   7   9    0.20    0.17   0
   6   8   9    0.38    0.27   0
   6   9  10   11.64    0.37   0
   6   9  11   -0.22    0.25   0
 -16  -4   2    1.22    0.33   0
 -16  -1  -3    2.00    0.37   0
 -15  -5   4   -0.03    0.32   0
 -15  -2  -2    0.68    0.32   0
 -15   3  -7   -0.22    0.30   0
 -14  -5   4    0.62    0.29   0
 -14  -4   1    1.60    0.21   0
 -14  -3  -1    1.36    0.22   0
 -14  -1  -4   15.43    0.35   0
 -14   0  -5    0.09    0.26   0
 -14   4  -8    0.34    0.24   0
 -13  -7  11   10.59    0.34   0
 -13  -3  -1    1.53    0.25   0
 -13  -1  -4    0.74    0.24   0
 -13   2  -7    3.58    0.26   0
 -12  -7  11    0.69    0.29   0
 -12  -2  -3    1.96    0.24   0
 -12   3  -8   98.40    0.55   0
 -11  -7  11   45.89    0.47   0
 -11  -5   3    1.43    0.16   0
 -11  -2  -3    4.46    0.21   0
 -11   3  -8   22.91    0.24   0
 -11   6  -9    1.55    0.17   0
 -10  -7  12   23.70    0.36   0
 -10  -2  -3    0.54    0.19   0
 -10   3  -8    6.13    0.17   0
 -10   6  -9   32.27    0.23   0
 -10   7  -9   15.90    0.21   0
  -9  -7  13    1.57    0.21   0
  -9  -6   7   28.26    0.27   0
  -9  -4   1    0.31    0.18   0
  -9  -2  -3    1.11    0.17   0
  -9   3  -8   65.76    0.26   0
  -9   6  -9    4.75    0.14   0
  -9   7  -9    9.38    0.15   0
  -8  -7  14    1.36    0.20   0
  -8  -5   4   88.07    0.32   0
  -8  -3  -1   10.70    0.18   0
  -8  10  -8    5.95    0.11   0
  -7  -7  16    2.93    0.16   0
  -7  -7  17    2.96    0.17   0
  -7  -1  -4   23.37    0.18   0
  -7   2  -7   13.13    0.14   0
  -6  -3   0   80.44    0.26   0
  -5  -4   3  214.71    0.36   0
  -5  -1  -3   81.06    0.23   0
  -5   3  -7   17.00    0.12   0
  -5   6  -8   34.65    0.11   0
  -4  -4   4  351.96    0.41   0
  -4   1  -5  140.74    0.23   0
  -4   4  -7    2.26    0.06   0
  -2  -4   7   18.15    0.09   0
  -2  11  -5    0.19    0.14   0
  -2  12  -4    4.51    0.16   0
  -1  11  -4    0.36    0.14   0
   0  11  -3    5.91    0.19   0
   0  12  -2   15.40    0.28   0
   1   1   0  793.63    0.31   0
   2   5  -2   70.09    0.19   0
   2   8  -2   22.35    0.17   0
   2  10  -1    2.47    0.18   0
   2  12   1    2.10    0.26   0
   3  -2  16    0.18    0.13   0
   3  -2  17    0.00    0.13   0
   3  -2  18   83.67    0.28   0
   3  -2  19   19.58    0.20   0
   3  -1   9    1.89    0.08   0
   3   0   6   47.59    0.15   0
   3   3   1   27.62    0.14   0
   3   9   0   76.62    0.33   0
   3  12   3   -0.09    0.29   0
   4  -1  17    7.15    0.18   0
   4   0  24    8.95    0.30   0
   4   9   2   43.21    0.31   0
   4  10   3   19.57    0.30   0
   4  11   4    2.52    0.29   0
   5   1  11    5.15    0.16   0
   5   1  22   21.89    0.33   0
   5   2   8   92.99    0.29   0
   5   4   5    6.87    0.16   0
   5   6   4   57.38    0.30   0
   5   7   4    6.54    0.21   0
   5   8   4   33.40    0.30   0
   5   9   5   -0.12    0.19   0
   5  10   6   24.59    0.36   0
   5  11   7    0.20    0.32   0
   6   3  11   10.44    0.22   0
   6   3  12   26.65    0.22   0
   6   3  21    0.47    0.32   0
   6   4   9   29.63    0.25   0
   6   6   7   19.76    0.24   0
   6   7   7    2.76    0.23   0
   6   8   8   13.61    0.30   0
   6   9   8    2.27    0.28   0
   6   9   9    4.45    0.30   0
   6  10  10   19.60    0.43   0
   6  10  11    4.31    0.37   0
   7   6  15    0.83    0.32   0
   7   6  16   74.35    0.51   0
   7   6  17    4.43    0.37   0
   7   6  18    5.10    0.36   0
   7   7  14   63.81    0.49   0
   7   7  15   13.53    0.38   0
   7   7  16    1.38    0.35   0
 -16  -4   3    0.48    0.33   0
 -16  -2  -1    0.94    0.34   0
 -16   0  -4   75.24    0.59   0
 -16   1  -5   16.52    0.39   0
 -15  -3   0   10.34    0.36   0
 -15  -1  -3    5.28    0.35   0
 -15   2  -6    5.11    0.35   0
 -14  -6   8   39.23    0.45   0
 -14  -2  -2    1.03    0.27   0
 -14   3  -7    0.13    0.24   0
 -13  -7  12    7.08    0.31   0
 -13  -5   4    3.66    0.29   0
 -13   1  -6   -0.23    0.25   0
 -13   4  -8    0.20    0.21   0
 -12  -7  12    2.46    0.30   0
 -12  -6   7    0.26    0.25   0
 -12  -3  -1    1.56    0.17   0
 -12  -1  -4    1.99    0.23   0
 -12   2  -7    0.44    0.22   0
 -12   4  -8   56.63    0.41   0
 -11  -7  12    4.14    0.28   0
 -11  -6   7    1.98    0.22   0
 -11  -5   4    0.28    0.19   0
 -11  -4   1   43.03    0.30   0
 -11  -3  -1  110.66    0.46   0
 -11  -1  -4   63.75    0.34   0
 -11   2  -7    0.69    0.18   0
 -10  -7  13   12.55    0.28   0
 -10  -5   4    7.37    0.24   0
 -10  -4   1    8.70    0.17   0
 -10  -3  -1   16.39    0.23   0
  -9  -7  14    0.49    0.22   0
  -9  -5   4    0.34    0.19   0
  -9  -1  -4   36.18    0.25   0
  -8  -7  15   15.08    0.27   0
  -8  -6   8    0.17    0.16   0
  -8  -1  -4  111.30    0.33   0
  -8   2  -7   42.68    0.21   0
  -7  -7  18    5.17    0.18   0
  -7  -7  19    9.80    0.23   0
  -7  -6   9   15.40    0.17   0
  -7  -5   5   76.08    0.28   0
  -7  -4   2  258.94    0.47   0
  -7   0  -5    0.52    0.12   0
  -7   1  -6  106.71    0.28   0
  -7   4  -8   64.00    0.22   0
  -6  -6  10    0.13    0.11   0
  -5  -6  12  151.14    0.36   0
  -4  -6  15   16.90    0.14   0
  -4  -5   8  284.03    0.40   0
  -4  10  -7    2.39    0.07   0
  -3  -5  10   63.11    0.17   0
  -3   0  -3    0.16    0.07   0
  -3  12  -5    7.97    0.17   0
   0  -4  24    0.58    0.13   0
   0  10  -4   15.14    0.18   0
   1  -3  10    6.14    0.05   0
   1   4  -3    0.61    0.07   0
   1  11  -2    2.97    0.19   0
   1  12  -1    2.70    0.23   0
   2  -3  17   11.48    0.13   0
   2  -3  18   82.76    0.23   0
   2  -3  19    2.47    0.13   0
   2  -2   9  258.25    0.26   0
   2   9  -2   54.78    0.25   0
   3  -2  14   74.25    0.22   0
   3  -2  15   26.10    0.15   0
   3  -2  20   56.18    0.26   0
   3  -2  21    4.60    0.18   0
   3   2   2  904.82    0.59   0
   3   4   0   53.04    0.19   0
   3   6  -1    6.46    0.12   0
   3  10   0   77.94    0.41   0
   3  11   1    2.55    0.23   0
   4  -1  14   12.53    0.16   0
   4  -1  15    7.65    0.14   0
   4  -1  18    9.40    0.17   0
   4  -1  19   10.43    0.20   0
   4  -1  20   18.99    0.25   0
   4   0   9   -0.11    0.10   0
   4   1   6   68.65    0.21   0
   4   3   3    1.06    0.12   0
   4   4   2  162.65    0.33   0
   4   6   1   25.47    0.20   0
   4   7   1  105.90    0.35   0
   4   8   1    7.57    0.20   0
   4  10   2    0.31    0.20   0
   4  11   3   -0.04    0.29   0
   5   1  10   70.37    0.26   0
   5   1  23    0.20    0.27   0
   5   3   6    0.17    0.09   0
   5   5   4   15.92    0.16   0
   5   7   3  118.94    0.40   0
   5   9   4   68.37    0.42   0
   5  10   5   16.73    0.33   0
   5  11   6    0.50    0.31   0
   6   2  13   54.85    0.30   0
   6   2  14   46.72    0.31   0
   6   2  15   21.83    0.27   0
   6   2  17   -0.15    0.21   0
   6   2  18    5.96    0.26   0
   6   2  19    0.04    0.26   0
   6   2  20   90.61    0.48   0
   6   3  10    6.42    0.20   0
   6   4   8  116.04    0.38   0
   6   5   7   84.29    0.34   0
   6   7   6   63.18    0.36   0
   6   8   7    7.00    0.22   0
   6   9   7    0.89    0.28   0
   7   5  13    0.27    0.26   0
   7   5  14   47.36    0.40   0
   7   5  15   14.16    0.33   0
   7   5  16   12.98    0.33   0
   7   5  17    8.38    0.34   0
   7   5  18   20.01    0.43   0
   7   5  19    5.23    0.38   0
   7   6  12    3.47    0.27   0
   7   6  13   17.35    0.31   0
   7   6  14    9.99    0.26   0
   7   7  11    1.77    0.25   0
   7   7  12   14.19    0.33   0
   7   7  13   15.56    0.30   0
   7   8  12    1.95    0.32   0
   7   8  13    7.77    0.38   0
   7   8  14   15.95    0.40   0
   7   8  15    0.53    0.27   0
 -16  -3   1    0.53    0.32   0
 -16  -1  -2   57.71    0.62   0
 -15  -4   3    1.24    0.30   0
 -15  -2  -1   12.85    0.34   0
 -15   1  -5    0.12    0.29   0
 -14  -1  -3   20.40    0.33   0
 -14   2  -6   17.80    0.31   0
 -13  -6   8   21.91    0.42   0
 -13  -2  -2   11.10    0.30   0
 -13   3  -7    3.12    0.26   0
 -13   5  -8   12.18    0.25   0
 -12  -7  13    1.30    0.28   0
 -12  -6   8   12.68    0.32   0
 -12   0  -5   -0.03    0.16   0
 -11  -7  13    2.92    0.26   0
 -11   0  -5    0.22    0.20   0
 -11   1  -6    6.08    0.21   0
 -11   4  -8  172.38    0.47   0
 -10  -7  14    0.30    0.23   0
 -10  -6   8    9.25    0.23   0
 -10  -1  -4   14.37    0.19   0
 -10   0  -5   -0.04    0.19   0
 -10   2  -7    2.18    0.18   0
 -10   4  -8   12.17    0.22   0
  -9  -7  15    4.54    0.23   0
  -9  -6   8   26.42    0.27   0
  -9   1  -6   79.35    0.31   0
  -9   2  -7    8.94    0.17   0
  -8  -7  16   28.88    0.29   0
  -8  -7  17    7.97    0.23   0
  -8  -6   9    1.82    0.16   0
  -8  -4   2  439.17    0.64   0
  -8   0  -5   -0.11    0.15   0
  -8   1  -6   46.10    0.23   0
  -8   4  -8  116.32    0.32   0
  -7  -3   0  291.25    0.48   0
  -7  -2  -2    0.42    0.09   0
  -6  -6  11   33.75    0.21   0
  -6  -5   6  297.87    0.47   0
  -6  -4   3   25.08    0.18   0
  -6   5  -8   22.44    0.13   0
  -5  -5   7    4.34    0.11   0
  -5  -3   1   26.68    0.17   0
  -5  -2  -1  187.04    0.32   0
  -5   0  -4 1244.98    0.77   0
  -4  -6  16    0.69    0.09   0
  -4  -6  22    1.70    0.09   0
  -3  11  -6    6.22    0.13   0
  -2  -5  13   11.07    0.07   0
   0   7  -5   34.08    0.13   0
   1  -2   6    6.31    0.04   0
   1   7  -4  130.40    0.27   0
   1  10  -3   20.56    0.21   0
   2  -3  15    2.23    0.09   0
   2  -3  16   20.56    0.13   0
   2   2   0  198.82    0.24   0
   2   3  -1   20.77    0.10   0
   2  11  -1    0.07    0.19   0
   2  12   0   11.55    0.27   0
   3  -2  13    0.10    0.10   0
   3  -2  22    0.36    0.20   0
   3   8  -1   17.47    0.20   0
   3  12   2    0.26    0.27   0
   4  -1  13    5.56    0.12   0
   4  -1  21    5.15    0.20   0
   4  -1  22    0.41    0.23   0
   4   2   4   70.47    0.22   0
   4   5   1   29.42    0.19   0
   4   9   1    0.07    0.20   0
   5   0  14    4.87    0.18   0
   5   0  16    1.86    0.16   0
   5   0  17    0.15    0.16   0
   5   0  18   10.07    0.21   0
   5   0  19    0.15    0.19   0
   5   0  20   60.43    0.36   0
   5   2   7    6.87    0.14   0
   5   3   5    0.12    0.13   0
   5   4   4   40.89    0.22   0
   5   6   3   41.46    0.23   0
   5   8   3    9.16    0.21   0
   5   9   3    6.52    0.22   0
   5  10   4    3.26    0.28   0
   5  11   5    0.30    0.29   0
   6   2  12  183.53    0.47   0
   6   3   9    1.58    0.17   0
   6   4   7   21.62    0.21   0
   6   5   6  103.48    0.37   0
   6   6   6   15.69    0.19   0
   6   8   6   10.66    0.27   0
   6   9   6    1.36    0.27   0
   6  10   7   18.45    0.36   0
   6  10   8   10.00    0.30   0
   7   4  13    8.66    0.27   0
   7   4  14   37.33    0.35   0
   7   4  15    1.06    0.27   0
   7   4  16   25.12    0.33   0
   7   4  18   31.61    0.42   0
   7   4  19    4.67    0.34   0
   7   4  20   29.04    0.42   0
   7   5  12   15.40    0.28   0
   7   6  10    6.91    0.26   0
   7   6  11    9.26    0.23   0
   7   8  10   46.07    0.41   0
   7   8  11    1.72    0.29   0
   7   9  11    1.16    0.35   0
   7   9  12   40.94    0.55   0
 -16  -3   2   75.14    0.61   0
 -16  -2   0    2.69    0.34   0
 -16   0  -3    0.27    0.33   0
 -16   1  -4   -0.24    0.32   0
 -16   2  -5    0.81    0.34   0
 -15  -5   6    3.38    0.34   0
 -15  -3   1    0.08    0.26   0
 -15   3  -6    1.79    0.32   0
 -14  -6   9    0.22    0.29   0
 -14  -2  -1    1.97    0.27   0
 -14   0  -4    3.22    0.27   0
 -14   1  -5    2.12    0.28   0
 -14   4  -7    3.93    0.28   0
 -13  -6   9    3.13    0.29   0
 -13  -5   5    8.71    0.27   0
 -13   2  -6   32.25    0.35   0
 -13   6  -8    2.58    0.23   0
 -12  -5   5   14.18    0.33   0
 -12   3  -7    4.55    0.21   0
 -12   5  -8   27.22    0.27   0
 -11  -7  14    1.41    0.24   0
 -11  -7  15   -0.11    0.25   0
 -11  -5   5   26.42    0.34   0
 -11  -4   2   24.19    0.28   0
 -11  -2  -2   -0.00    0.20   0
 -10  -7  15    0.60    0.21   0
 -10  -5   5   17.55    0.29   0
 -10  -4   2   13.69    0.24   0
 -10  -2  -2    3.97    0.19   0
  -9  -7  16   31.74    0.37   0
  -9  -6   9    0.19    0.17   0
  -9  -5   5    1.55    0.20   0
  -9  -4   2   96.30    0.34   0
  -9  -3   0   55.01    0.29   0
  -9  -2  -2    9.42    0.19   0
  -9   4  -8   12.07    0.16   0
  -8  -7  18    6.28    0.21   0
  -8  -7  19    0.76    0.19   0
  -8  -3   0  311.58    0.54   0
  -8  -2  -2    8.66    0.13   0
  -7  -6  10    8.90    0.16   0
  -6  -1  -3   86.93    0.23   0
  -6   3  -7    0.58    0.08   0
  -5  -6  13   15.28    0.16   0
  -5  -4   4  419.49    0.49   0
  -5   1  -5   77.71    0.21   0
  -5   2  -6    3.61    0.09   0
  -4  -6  17    7.83    0.12   0
  -4  -3   2   64.23    0.19   0
  -4  -1  -2  501.06    0.44   0
  -3   1  -4  456.79    0.34   0
  -3   2  -5  125.59    0.17   0
  -3   9  -7   26.55    0.09   0
  -2  -3   4  135.78    0.18   0
  -2   0  -2  259.00    0.22   0
  -2  10  -6    1.31    0.10   0
   0   6  -5    1.69    0.06   0
   0   8  -5   15.45    0.12   0
   1   6  -4    9.66    0.10   0
   1   8  -4   93.92    0.25   0
   2  -3  22   10.09    0.18   0
   2   0   3    0.06    0.05   0
   2   7  -3    6.17    0.13   0
   2  10  -2   14.75    0.21   0
   3  -2  23    4.31    0.23   0
   3  -1   8   85.74    0.19   0
   3   0   5    0.07    0.07   0
   3   1   3   70.24    0.17   0
   3   5  -1   41.12    0.18   0
   3   9  -1    0.92    0.16   0
   3  11   0    0.91    0.23   0
   4  -1  12  271.41    0.40   0
   4  -1  23    0.03    0.25   0
   4   7   0   21.75    0.20   0
   4  10   1    9.10    0.22   0
   4  11   2   60.21    0.43   0
   4  12   3   19.42    0.40   0
   5   0  13    0.05    0.13   0
   5   0  21    0.89    0.21   0
   5   0  22   51.31    0.43   0
   5   1   9  107.46    0.29   0
   5   5   3   10.16    0.14   0
   5   7   2  105.79    0.37   0
   6   1  16   36.79    0.33   0
   6   1  17    3.36    0.20   0
   6   1  18    1.91    0.23   0
   6   2  11   58.64    0.29   0
   6   3   8    0.75    0.15   0
   6   6   5   45.01    0.28   0
   6   7   5   88.76    0.39   0
   6   8   5   25.60    0.30   0
   6  10   6   28.82    0.38   0
   7   3  15    0.18    0.23   0
   7   3  16    2.20    0.26   0
   7   3  17    1.94    0.28   0
   7   3  18   14.16    0.35   0
   7   3  19    0.70    0.26   0
   7   4  11    2.56    0.21   0
   7   4  12    1.48    0.23   0
   7   5  10    5.51    0.23   0
   7   6   9   25.42    0.30   0
   7   7   9   30.44    0.35   0
   7   9   9    0.46    0.31   0
   7   9  10   19.25    0.42   0
 -17  -2   1    1.35    0.38   0
 -16  -1  -1    4.49    0.33   0
 -15  -5   7    0.62    0.35   0
 -15  -2   0    0.21    0.27   0
 -15   1  -4   45.14    0.49   0
 -15   2  -5    7.21    0.32   0
 -14  -6  10   17.17    0.39   0
 -14  -3   1    0.02    0.25   0
 -14   5  -7    3.82    0.29   0
 -13  -6  10    0.20    0.24   0
 -13  -4   3    0.28    0.26   0
 -13   0  -4    6.57    0.28   0
 -13   1  -5    4.81    0.25   0
 -12  -6   9    0.49    0.23   0
 -12  -1  -3    1.68    0.21   0
 -12   2  -6  111.21    0.47   0
 -12   7  -8    3.89    0.24   0
 -11  -7  16    1.39    0.25   0
 -11  -6   9   51.27    0.43   0
 -11   3  -7    0.52    0.17   0
 -11   5  -8    2.45    0.18   0
 -10  -7  16    7.99    0.26   0
 -10  -7  17   -0.24    0.24   0
 -10  -6   9   36.64    0.33   0
 -10   5  -8    0.60    0.18   0
  -9  -7  17    1.24    0.21   0
  -9  -7  18   17.17    0.28   0
  -7  -6  11    9.27    0.17   0
  -7  -5   6   49.74    0.24   0
  -7  -4   3  242.95    0.45   0
  -7  -1  -3   36.01    0.20   0
  -7   3  -7    9.33    0.14   0
  -7   5  -8   16.06    0.14   0
  -6  -6  12    4.94    0.15   0
  -6  -5   7    1.58    0.13   0
  -6  -3   1   55.08    0.22   0
  -6  -2  -1    3.23    0.13   0
  -6   0  -4  219.77    0.36   0
  -6   6  -8   74.50    0.19   0
  -4  -6  21    0.46    0.09   0
  -4  -5   9    4.10    0.11   0
  -4  -4   5   43.28    0.17   0
  -4  -2   0  123.42    0.24   0
  -3  -3   3   14.03    0.09   0
  -1   7  -6   74.60    0.14   0
  -1   8  -6    0.30    0.08   0
  -1  12  -4    6.94    0.18   0
   0   9  -5    8.14    0.13   0
   0  11  -4   16.06    0.21   0
   0  12  -3    3.23    0.19   0
   1   9  -4    9.18    0.15   0
   1  11  -3    0.23    0.18   0
   1  12  -2    8.41    0.24   0
   2  -3  14   31.68    0.12   0
   2  -3  23    1.80    0.16   0
   2   4  -2  102.88    0.20   0
   2   6  -3    0.42    0.09   0
   3  -2  12  180.91    0.29   0
   3  -2  24    0.16    0.22   0
   3  10  -1    0.29    0.18   0
   4   1   5  151.81    0.29   0
   4   3   2   12.53    0.14   0
   4   4   1   22.22    0.16   0
   4   6   0  252.81    0.44   0
   4   8   0    6.70    0.18   0
   4   9   0   22.79    0.24   0
   5   0  12    6.61    0.14   0
   5   0  23    0.86    0.27   0
   5   2   6    3.44    0.13   0
   5   6   2    0.94    0.16   0
   5   8   2    5.35    0.16   0
   5   9   2  102.51    0.43   0
   5  10   3    0.20    0.22   0
   6   1  14   53.28    0.29   0
   6   1  15   -0.13    0.20   0
   6   1  19    2.84    0.23   0
   6   1  20   27.26    0.34   0
   6   1  21    0.45    0.27   0
   6   2  10   30.48    0.23   0
   6   4   6    0.18    0.16   0
   6   5   5   76.55    0.32   0
   6   7   4   45.49    0.30   0
   6   8   4   19.27    0.27   0
   7   3  13   23.24    0.28   0
   7   3  14   13.75    0.26   0
   7   3  20   32.02    0.42   0
   7   3  21    0.12    0.34   0
   7   4  10    7.44    0.22   0
   7   5   9    3.37    0.20   0
   7   6   8   77.66    0.39   0
   7   7   8    1.33    0.18   0
   7   9   8   28.19    0.39   0
   7  10   9    1.24    0.36   0
   8   6  14   65.83    0.48   0
   8   6  15   30.48    0.40   0
   8   6  16   16.02    0.41   0
   8   6  17    1.02    0.37   0
   8   7  14    5.83    0.34   0
   8   7  15    4.18    0.37   0
 -17  -1   0    8.17    0.41   0
 -16  -4   5    4.98    0.29   0
 -16  -3   3    2.54    0.34   0
 -16  -2   1   -0.27    0.31   0
 -16   0  -2    1.79    0.37   0
 -16   2  -4   35.56    0.45   0
 -15  -3   2    2.88    0.24   0
 -15   4  -6    6.75    0.31   0
 -14  -6  11    1.27    0.31   0
 -14  -5   7   16.34    0.41   0
 -14  -1  -2    3.61    0.22   0
 -14   0  -3    0.00    0.24   0
 -14   2  -5   -0.04    0.24   0
 -14   3  -6    6.65    0.28   0
 -12  -6  10    3.66    0.27   0
 -12  -5   6   92.45    0.55   0
 -12  -4   3    0.33    0.18   0
 -12  -3   1    1.12    0.22   0
 -12  -2  -1   16.62    0.26   0
 -12   0  -4   33.35    0.29   0
 -12   1  -5    8.43    0.24   0
 -12   4  -7    4.35    0.24   0
 -11  -4   3   12.59    0.25   0
 -11   2  -6    6.47    0.21   0
 -11   6  -8   45.18    0.28   0
 -11   8  -8    1.12    0.19   0
 -10  -6  10    2.20    0.21   0
 -10  -5   6   12.15    0.26   0
 -10  -4   3    0.82    0.19   0
 -10  -1  -3    8.77    0.20   0
 -10   3  -7   11.03    0.19   0
  -9  -6  10    0.15    0.17   0
  -9  -4   3   40.89    0.27   0
  -9  -1  -3   12.81    0.19   0
  -9   3  -7    1.82    0.14   0
  -9   5  -8   20.27    0.18   0
  -8  -5   6    7.23    0.17   0
  -8  -4   3    7.28    0.17   0
  -8  -1  -3   27.08    0.17   0
  -8   3  -7    5.04    0.13   0
  -8   5  -8   39.85    0.19   0
  -7  -3   1   65.06    0.25   0
  -7  -2  -1   41.12    0.21   0
  -7   0  -4  216.86    0.39   0
  -7   9  -8   22.35    0.13   0
  -6  -4   4  112.13    0.29   0
  -6   1  -5    0.59    0.10   0
  -6   2  -6    8.84    0.11   0
  -5  -6  14   10.29    0.14   0
  -5  -5   8    0.26    0.10   0
  -5   4  -7  104.16    0.20   0
  -4  -6  19    0.16    0.09   0
  -4  -6  20   15.51    0.13   0
  -3  -5  11   68.81    0.17   0
  -3  -1  -1   41.16    0.13   0
  -1   0  -1    0.04    0.02   0
  -1  11  -5    4.31    0.15   0
   2  -1   5    5.48    0.06   0
   2   1   1  916.08    0.44   0
   2   9  -3    3.08    0.13   0
   2  11  -2    7.76    0.21   0
   2  12  -1    3.59    0.23   0
   3   3   0   55.71    0.17   0
   3   6  -2    8.03    0.13   0
   3   7  -2    0.35    0.11   0
   3   8  -2  193.96    0.41   0
   4  -1  11   14.98    0.13   0
   4   2   3  425.41    0.45   0
   4   5   0   51.03    0.21   0
   4  10   0    1.85    0.21   0
   4  11   1    0.77    0.25   0
   4  12   2    0.17    0.27   0
   5   0  11   -0.09    0.12   0
   5   3   4   16.36    0.13   0
   5   5   2   28.19    0.20   0
   5  10   2    2.19    0.24   0
   5  11   3   13.84    0.33   0
   6   1  12    3.88    0.17   0
   6   1  13   40.03    0.25   0
   6   1  22   56.81    0.47   0
   6   2   9    7.56    0.17   0
   6   3   7    0.45    0.11   0
   6   6   4    1.47    0.14   0
   6   9   4    5.06    0.26   0
   6  10   5   38.97    0.38   0
   7   2  16   14.34    0.26   0
   7   2  17    0.83    0.22   0
   7   2  18   18.01    0.31   0
   7   3  11    2.19    0.20   0
   7   3  12  105.08    0.38   0
   7   4   9   13.00    0.22   0
   7   5   8   15.90    0.19   0
   7   6   7    4.77    0.22   0
   7   8   7    0.19    0.19   0
   7   9   7    1.97    0.30   0
   7  10   8   15.34    0.42   0
   8   5  15    5.46    0.33   0
   8   5  16   24.67    0.43   0
   8   5  17    1.60    0.36   0
   8   5  18    0.28    0.37   0
   8   6  12    1.44    0.27   0
   8   6  13    4.59    0.30   0
   8   7  11    2.69    0.26   0
   8   7  12   47.86    0.48   0
   8   7  13    2.48    0.24   0
   8   8  11    5.69    0.32   0
   8   8  12    2.16    0.34   0
   8   8  13    7.68    0.31   0
 -17  -2   2    9.98    0.37   0
 -17   0  -1   -0.19    0.37   0
 -16   1  -3    2.15    0.24   0
 -15  -5   8    0.02    0.25   0
 -15  -4   5    3.26    0.31   0
 -15  -3   3    5.48    0.30   0
 -15  -1  -1   -0.07    0.27   0
 -14  -6  12    8.82    0.37   0
 -14  -5   8    0.49    0.27   0
 -14  -3   2    2.43    0.26   0
 -14  -2   0   -0.01    0.18   0
 -14   1  -4   13.19    0.33   0
 -14   4  -6   13.20    0.35   0
 -13  -6  11    0.58    0.25   0
 -13  -5   7    3.34    0.28   0
 -13  -4   4   65.38    0.49   0
 -13  -1  -2    0.38    0.19   0
 -13   3  -6    8.76    0.26   0
 -13   5  -7    1.20    0.21   0
 -12  -6  11    6.61    0.31   0
 -12  -5   7   24.63    0.35   0
 -11  -6  11    2.30    0.24   0
 -11  -3   1    6.36    0.20   0
 -11  -2  -1   10.72    0.18   0
 -11   1  -5   -0.04    0.18   0
 -11   4  -7   11.51    0.24   0
 -11   7  -8    4.17    0.19   0
 -10  -3   1   66.79    0.32   0
 -10  -2  -1   51.58    0.29   0
 -10   0  -4    2.26    0.18   0
 -10   1  -5   -0.13    0.17   0
 -10   2  -6   17.20    0.21   0
 -10   6  -8   60.25    0.28   0
 -10   8  -8    0.06    0.15   0
  -9  -6  11    1.14    0.17   0
  -9  -3   1    0.14    0.17   0
  -9  -2  -1    2.94    0.16   0
  -9   0  -4  152.98    0.39   0
  -9   2  -6  136.74    0.35   0
  -9   6  -8   37.84    0.24   0
  -9   9  -8   17.03    0.20   0
  -8  -6  11   68.93    0.34   0
  -8  -3   1    2.52    0.15   0
  -8  -2  -1    0.99    0.14   0
  -8   0  -4  312.37    0.50   0
  -8   2  -6  366.80    0.51   0
  -8   9  -8    2.94    0.12   0
  -7  -6  12   27.15    0.24   0
  -7  -5   7    2.88    0.13   0
  -7   1  -5   18.89    0.16   0
  -7   2  -6   34.26    0.17   0
  -7   6  -8   65.84    0.23   0
  -6  -6  13   20.37    0.19   0
  -6   7  -8    0.91    0.08   0
  -5  -6  15   11.71    0.15   0
  -5  -3   2   37.91    0.18   0
  -5  -1  -2   53.76    0.17   0
  -4   0  -3    0.12    0.08   0
  -4   3  -6   77.99    0.16   0
  -3  -2   1   14.47    0.09   0
  -2  -5  14    2.99    0.06   0
  -2  -4   8   98.94    0.16   0
  -2   3  -5    6.79    0.04   0
  -1   6  -6    4.72    0.05   0
  -1   9  -6    0.53    0.09   0
   1  -4  19   19.12    0.11   0
   1   5  -4  646.45    0.44   0
   1  10  -4    0.80    0.14   0
   2  -3  13    8.10    0.08   0
   2  -3  24   24.16    0.23   0
   2  -2   8   11.33    0.07   0
   2   5  -3  101.67    0.22   0
   2  10  -3    1.21    0.18   0
   3  -2  11   53.00    0.17   0
   3  -1   7   40.04    0.14   0
   3   2   1   59.01    0.16   0
   3  11  -1    6.77    0.23   0
   3  12   0   39.21    0.41   0
   4   0   7    0.10    0.07   0
   4   7  -1    3.61    0.14   0
   4   8  -1    2.54    0.15   0
   5   1   7    2.28    0.12   0
   5   2   5  298.67    0.44   0
   5   6   1    8.99    0.17   0
   5   7   1    6.46    0.14   0
   5   8   1   33.97    0.27   0
   5   9   1   14.72    0.24   0
   6   1  11   88.07    0.31   0
   6   2   8   39.44    0.22   0
   6   3   6   76.40    0.28   0
   6   4   5  112.16    0.32   0
   6   5   4    5.38    0.14   0
   6   6   3   85.83    0.34   0
   6   7   3   41.34    0.30   0
   6   8   3  105.51    0.44   0
   6   9   3   17.63    0.29   0
   6  10   4    3.06    0.28   0
   7   2  13    0.03    0.18   0
   7   2  14   60.08    0.34   0
   7   2  15    1.37    0.21   0
   7   2  19    3.00    0.26   0
   7   2  20   53.72    0.49   0
   7   3  10  129.85    0.41   0
   7   4   8   68.17    0.33   0
   7   5   7   22.29    0.25   0
   7   7   6   67.29    0.39   0
   7   8   6   33.53    0.35   0
   7   9   6   14.39    0.33   0
   7  10   7   16.47    0.41   0
   8   4  14   49.35    0.38   0
   8   4  15   70.62    0.44   0
   8   4  16    4.70    0.31   0
   8   4  17    1.99    0.31   0
   8   4  18    8.11    0.35   0
   8   4  19    0.55    0.33   0
   8   5  12   54.33    0.40   0
   8   5  13    0.65    0.18   0
   8   6  10   16.23    0.28   0
   8   7  10   36.97    0.39   0
   8   8  10    0.47    0.31   0
   8   9  10   38.32    0.45   0
   8   9  11    3.00    0.37   0
 -17  -2   3    3.59    0.34   0
 -17  -1   1   -0.16    0.36   0
 -16  -3   4    1.33    0.34   0
 -16  -2   2   -0.40    0.31   0
 -16  -1   0    7.81    0.28   0
 -16   0  -1    0.18    0.30   0
 -15  -5   9    2.25    0.33   0
 -15  -4   6    5.31    0.36   0
 -15   1  -3    4.60    0.31   0
 -15   2  -4    6.96    0.31   0
 -14  -1  -1    4.24    0.27   0
 -13  -6  12   10.06    0.33   0
 -13  -2   0   22.82    0.30   0
 -13   0  -3   -0.19    0.18   0
 -13   1  -4    0.52    0.24   0
 -13   2  -5    0.62    0.22   0
 -13   6  -7    1.11    0.22   0
 -12  -6  12   10.00    0.31   0
 -12  -4   4   74.36    0.40   0
 -12   3  -6   41.25    0.30   0
 -12   5  -7    8.42    0.22   0
 -11  -5   7   76.85    0.42   0
 -11  -4   4   30.51    0.28   0
 -11  -1  -2  126.86    0.41   0
 -10   4  -7   21.13    0.21   0
 -10   7  -8    2.74    0.15   0
  -9  -5   7    7.29    0.19   0
  -9   1  -5    0.48    0.11   0
  -9   7  -8   10.27    0.16   0
  -9   8  -8    6.21    0.15   0
  -8  -5   7   24.00    0.22   0
  -8  -4   4  106.78    0.33   0
  -8   6  -8   17.85    0.15   0
  -7   7  -8    1.19    0.10   0
  -6  -6  14  197.80    0.45   0
  -6  -5   8   16.48    0.15   0
  -6  -1  -2  100.73    0.26   0
  -6   4  -7   20.34    0.14   0
  -5  -6  16   22.10    0.18   0
  -5  -5   9   48.29    0.20   0
  -5  -4   5  150.93    0.30   0
  -5  -2   0  390.25    0.44   0
  -4  -5  10   48.08    0.18   0
  -4   5  -7    2.05    0.05   0
  -2  -2   2  102.94    0.16   0
   0   5  -5   54.07    0.11   0
   0  10  -5    0.15    0.11   0
   1  -4  17   50.34    0.13   0
   1  -4  18    1.25    0.07   0
   1  -4  20   49.75    0.17   0
   1  -4  21    7.74    0.12   0
   1  12  -3    1.12    0.23   0
   2  12  -2    7.97    0.28   0
   3   5  -2   68.36    0.20   0
   3  10  -2    7.34    0.20   0
   4  -2  17    0.31    0.14   0
   4  -2  18   73.98    0.28   0
   4  -2  19    0.78    0.16   0
   4  -1  10   19.93    0.14   0
   4   6  -1   13.34    0.15   0
   4   9  -1    2.45    0.17   0
   4  11   0    1.56    0.23   0
   4  12   1   -0.17    0.25   0
   5  -1  16    3.59    0.14   0
   5  -1  17    3.52    0.16   0
   5  -1  18   -0.10    0.16   0
   5  -1  19    9.84    0.20   0
   5  -1  20   15.98    0.23   0
   5  -1  21    2.51    0.21   0
   5   3   3    2.63    0.13   0
   5   4   2   31.37    0.19   0
   5  10   1    3.49    0.23   0
   5  11   2   12.92    0.34   0
   6   0  16   28.76    0.23   0
   6   0  17   -0.17    0.17   0
   6   0  18  105.78    0.39   0
   6   0  19    2.37    0.21   0
   6   0  20   61.51    0.41   0
   6   1  10   41.35    0.23   0
   6  10   3   19.75    0.32   0
   6  11   4   13.35    0.34   0
   7   2  12   60.76    0.32   0
   7   3   9    0.91    0.18   0
   7   4   7   61.06    0.30   0
   7   5   6  285.70    0.58   0
   7   7   5   19.29    0.28   0
   7   8   5   38.89    0.36   0
   7   9   5   70.31    0.44   0
   7  10   6   16.49    0.40   0
   8   4  13   20.68    0.31   0
   8   5  10    1.91    0.23   0
   8   6   9    2.85    0.24   0
   8   7   9    5.26    0.27   0
   8   8   9    0.37    0.29   0
 -17   0   0    9.31    0.43   0
 -16  -4   7   -0.05    0.26   0
 -16   1  -2   56.10    0.62   0
 -16   2  -3    7.58    0.36   0
 -15  -5  10    0.34    0.32   0
 -15  -3   4    0.37    0.29   0
 -15  -2   2    4.73    0.29   0
 -15  -1   0    9.84    0.33   0
 -15   4  -5    1.88    0.30   0
 -14  -5   9    0.09    0.29   0
 -14  -3   3    0.28    0.20   0
 -14  -2   1    3.74    0.22   0
 -14   0  -2    5.57    0.28   0
 -14   2  -4    6.56    0.27   0
 -14   3  -5    0.82    0.27   0
 -14   5  -6    0.16    0.24   0
 -13  -6  13    5.53    0.32   0
 -13  -4   5    8.44    0.25   0
 -13  -1  -1    3.37    0.25   0
 -13   4  -6   10.14    0.24   0
 -12  -6  13    0.57    0.24   0
 -12  -5   8   43.95    0.36   0
 -12  -4   5   12.66    0.27   0
 -12   0  -3   -0.05    0.15   0
 -12   1  -4    2.33    0.20   0
 -12   2  -5    7.59    0.23   0
 -12   6  -7    0.27    0.21   0
 -11  -6  12    0.81    0.22   0
 -11  -3   2   12.89    0.23   0
 -11  -2   0  129.42    0.41   0
 -11   0  -3    0.25    0.18   0
 -11   3  -6    1.31    0.17   0
 -11   5  -7   -0.00    0.18   0
 -10  -6  12   15.11    0.25   0
  -9  -6  12  105.06    0.46   0
  -9  -4   4  187.02    0.45   0
  -9  -1  -2   61.98    0.27   0
  -9   4  -7   46.60    0.22   0
  -8  -1  -2   42.35    0.22   0
  -8   4  -7   53.81    0.23   0
  -8   7  -8   10.88    0.13   0
  -8   8  -8   68.18    0.26   0
  -7  -6  13    9.97    0.17   0
  -7  -5   8   27.93    0.19   0
  -7  -1  -2  242.85    0.41   0
  -7   4  -7   55.42    0.21   0
  -6  -3   2   58.63    0.20   0
  -6  -2   0  132.47    0.30   0
  -5   0  -3    0.17    0.10   0
  -4  -4   6  592.37    0.50   0
  -4  -3   3    4.00    0.09   0
  -4   1  -4  120.84    0.20   0
  -4   2  -5   21.59    0.10   0
  -3  -5  12   31.90    0.13   0
  -3  -4   7  183.43    0.26   0
  -2  -1   0   64.19    0.11   0
  -2   1  -3   60.42    0.10   0
  -2  11  -6   25.58    0.16   0
  -1  -4  10  301.98    0.19   0
   0  12  -4    0.19    0.17   0
   1  -4  22    3.90    0.11   0
   1  11  -4   45.53    0.29   0
   2   8  -4    6.42    0.13   0
   3   0   4   23.64    0.11   0
   3  12  -1    0.03    0.22   0
   4  -2  15   22.94    0.16   0
   4  -2  16    8.60    0.13   0
   4  -2  20    1.87    0.15   0
   4  -2  21    7.59    0.18   0
   4  -2  22    0.16    0.19   0
   4   1   4  123.04    0.24   0
   4   3   1   15.04    0.13   0
   4   4   0   75.48    0.23   0
   4  10  -1   11.32    0.22   0
   5  -1  14   41.75    0.20   0
   5  -1  22   21.17    0.28   0
   5  -1  23   -0.08    0.24   0
   5   5   1   -0.07    0.09   0
   5   7   0   47.80    0.26   0
   5   8   0   32.97    0.26   0
   5   9   0    0.47    0.18   0
   6   0  14  275.20    0.51   0
   6   0  21    1.49    0.23   0
   6   0  22    1.16    0.25   0
   6   2   7   10.92    0.16   0
   6   3   5   17.20    0.17   0
   6   4   4   13.95    0.14   0
   6   5   3   46.54    0.22   0
   6   7   2   36.14    0.29   0
   6   8   2    0.67    0.20   0
   6   9   2   44.61    0.34   0
   7   1  16   10.77    0.23   0
   7   1  18    6.92    0.25   0
   7   1  19    0.67    0.22   0
   7   2  11    0.36    0.19   0
   7   3   8   28.59    0.23   0
   7   6   5    4.20    0.15   0
   7   7   4   34.61    0.29   0
   7   8   4   20.47    0.29   0
   7  10   5   20.34    0.37   0
   8   3  14    0.86    0.24   0
   8   3  15    1.62    0.26   0
   8   3  16    5.54    0.26   0
   8   3  17    7.62    0.24   0
   8   3  18    0.02    0.21   0
   8   3  19    3.71    0.29   0
   8   4  11    7.35    0.26   0
   8   5   9   37.54    0.31   0
   8   6   8   19.30    0.28   0
   8   7   8    9.66    0.22   0
   8   8   7   17.15    0.32   0
   8   8   8   66.00    0.45   0
   8   9   8    3.25    0.35   0
   9   7  13    0.66    0.34   0
   9   7  14    1.27    0.37   0
 -17  -2   4   21.48    0.48   0
 -17  -1   2   15.40    0.43   0
 -16  -4   8    8.95    0.42   0
 -16  -2   3    1.87    0.32   0
 -16  -1   1   -0.02    0.23   0
 -15  -5  11    1.26    0.33   0
 -15  -4   7   16.96    0.41   0
 -15   0  -1   -0.05    0.29   0
 -15   3  -4    2.80    0.30   0
 -14  -5  10   16.62    0.38   0
 -14  -1   0    7.19    0.30   0
 -13  -6  14   14.35    0.39   0
 -13  -5   9   13.86    0.32   0
 -13  -3   3    0.66    0.18   0
 -13   0  -2   56.30    0.36   0
 -13   3  -5   19.79    0.26   0
 -12  -6  14    2.40    0.29   0
 -12   4  -6   58.04    0.36   0
 -12   7  -7    0.11    0.24   0
 -11  -6  13    0.05    0.22   0
 -11  -5   8    5.24    0.19   0
 -11  -4   5    0.54    0.21   0
 -11   1  -4   60.77    0.33   0
 -11   2  -5    0.43    0.18   0
 -10  -6  13    0.58    0.20   0
 -10  -5   8    4.83    0.21   0
 -10  -3   2   96.53    0.36   0
 -10  -2   0    0.62    0.16   0
 -10   0  -3   -0.01    0.17   0
 -10   3  -6   31.48    0.22   0
  -9  -6  13   30.13    0.27   0
  -9  -5   8   19.10    0.22   0
  -9  -3   2  504.83    0.72   0
  -9  -2   0   25.42    0.21   0
  -8  -6  13    1.62    0.17   0
  -8  -5   8  134.49    0.39   0
  -8  -3   2  107.21    0.33   0
  -8  -2   0  111.72    0.32   0
  -7  -6  14   66.26    0.32   0
  -7  -3   2   24.20    0.15   0
  -7  -2   0   72.51    0.25   0
  -6  -6  15   20.77    0.20   0
  -6  -5   9    4.66    0.13   0
  -6  -4   5  156.77    0.32   0
  -5  -6  17    4.60    0.12   0
  -5   3  -6    0.39    0.07   0
  -4  -1  -1   17.80    0.11   0
  -3  -3   4  748.81    0.48   0
  -3  10  -7   13.50    0.08   0
  -2   2  -4  119.46    0.12   0
  -1  10  -6    0.34    0.10   0
  -1  12  -5    4.09    0.16   0
   0  11  -5    1.02    0.15   0
   1  -4  16   31.04    0.10   0
   1  -4  23    1.85    0.11   0
   1   7  -5    2.85    0.09   0
   1   8  -5    3.61    0.10   0
   2  -3  12   85.48    0.15   0
   2   7  -4   20.70    0.14   0
   2   9  -4   10.67    0.15   0
   3  -2  10  813.06    0.52   0
   3   1   2   36.66    0.13   0
   3   7  -3   13.80    0.14   0
   3   9  -3   44.83    0.24   0
   3  11  -2    1.21    0.20   0
   4  -2  14   22.96    0.15   0
   4  -2  23    0.25    0.20   0
   4  -1   9   36.53    0.15   0
   4   0   6   42.86    0.15   0
   4   2   2  368.21    0.41   0
   4   5  -1    1.58    0.11   0
   4   8  -2   35.00    0.24   0
   4  12   0   13.88    0.30   0
   5  -1  13   18.72    0.16   0
   5   1   6   10.72    0.11   0
   5   2   4   45.06    0.18   0
   5   6   0   20.86    0.18   0
   5  10   0   11.81    0.25   0
   5  11   1    3.87    0.25   0
   6   0  13   -0.02    0.14   0
   6   1   9   97.71    0.30   0
   6   6   2    6.60    0.15   0
   6  10   2   21.88    0.33   0
   7   1  14  339.11    0.63   0
   7   1  15    3.10    0.25   0
   7   1  20   27.27    0.34   0
   7   1  21   -0.10    0.27   0
   7   2  10  180.81    0.46   0
   7   4   6    6.34    0.18   0
   7   5   5   80.32    0.31   0
   7   6   4   49.74    0.31   0
   7   9   4   16.13    0.31   0
   7  10   4   10.80    0.30   0
   8   3  12    1.34    0.22   0
   8   4  10  107.74    0.40   0
   8   5   8   43.22    0.31   0
   8   7   7    8.78    0.22   0
   8   9   7   13.99    0.36   0
   8  10   7   15.61    0.39   0
   8  10   8    5.96    0.30   0
   9   5  14    3.99    0.31   0
   9   5  16    3.41    0.33   0
   9   6  12    9.49    0.34   0
   9   7  11    1.66    0.30   0
   9   7  12    4.07    0.27   0
   9   8  11    1.51    0.34   0
   9   8  12    9.90    0.32   0
 -17   0   1    0.29    0.35   0
 -16  -4   9    3.62    0.38   0
 -16  -3   6   10.18    0.38   0
 -16   0   0    1.39    0.24   0
 -16   1  -1    3.83    0.35   0
 -16   2  -2    3.79    0.31   0
 -16   3  -3    0.42    0.31   0
 -15  -2   3    2.63    0.29   0
 -15  -1   1    5.50    0.31   0
 -15   2  -3    1.77    0.26   0
 -14  -5  11    7.46    0.31   0
 -14  -4   7    0.09    0.29   0
 -14  -2   2   -0.04    0.23   0
 -14   0  -1    0.33    0.24   0
 -14   4  -5   -0.09    0.24   0
 -13  -6  15    5.82    0.29   0
 -13  -5  10   50.13    0.50   0
 -13   1  -3    2.22    0.23   0
 -13   2  -4    4.94    0.24   0
 -13   5  -6    0.97    0.20   0
 -12  -6  15    2.69    0.26   0
 -12  -5   9   17.39    0.29   0
 -12  -4   6    1.40    0.23   0
 -12  -2   1    2.72    0.21   0
 -12   0  -2    0.09    0.19   0
 -11  -6  14   11.70    0.26   0
 -11  -3   3    2.23    0.18   0
 -11  -1  -1   68.79    0.33   0
 -11   6  -7   35.49    0.26   0
 -10  -6  14   66.22    0.48   0
 -10  -4   5   69.66    0.33   0
 -10   1  -4   16.16    0.21   0
 -10   2  -5    4.69    0.17   0
  -9  -6  14   35.55    0.36   0
  -9  -4   5   21.61    0.23   0
  -9   0  -3   -0.04    0.14   0
  -9   3  -6    8.08    0.16   0
  -9   5  -7    0.42    0.14   0
  -8  -6  14    0.78    0.16   0
  -8  -4   5   78.91    0.29   0
  -8   3  -6  108.59    0.30   0
  -7  -6  15    6.53    0.19   0
  -7  -5   9   10.32    0.16   0
  -7  -4   5   61.23    0.23   0
  -7   0  -3    0.01    0.11   0
  -7   3  -6  122.35    0.29   0
  -6  -6  16   30.49    0.23   0
  -6   0  -3    0.01    0.08   0
  -6   3  -6   70.10    0.19   0
  -5  -6  18    7.64    0.15   0
  -5  -6  19    6.74    0.15   0
  -5  -5  10  218.62    0.38   0
  -5  -4   6  286.85    0.39   0
  -5  -3   3   77.79    0.22   0
  -5   1  -4    3.89    0.10   0
  -5   2  -5  284.42    0.34   0
  -5   5  -7    7.78    0.08   0
  -4  -5  11   26.34    0.14   0
  -4  -2   1  178.18    0.26   0
  -3   4  -6    1.84    0.05   0
  -2  -3   5    4.88    0.07   0
  -2   8  -7    1.88    0.05   0
   1  -4  24    3.85    0.13   0
   1  -1   3   69.62    0.07   0
   1   3  -3   14.39    0.07   0
   1   9  -5    2.03    0.11   0
   2   3  -2  185.24    0.23   0
   2   6  -4  186.74    0.30   0
   2  10  -4    9.60    0.20   0
   3  -3  17    0.06    0.11   0
   3  -3  18   90.22    0.24   0
   3  -3  19   10.72    0.14   0
   3  -3  20   64.88    0.24   0
   3  -3  21    2.71    0.14   0
   3   6  -3   14.43    0.13   0
   4   7  -2   52.52    0.23   0
   4   9  -2    1.81    0.15   0
   5  -1  12   26.30    0.16   0
   5   0   8  128.14    0.28   0
   5   3   2  403.25    0.49   0
   5   4   1   44.27    0.20   0
   6   0  12   30.37    0.20   0
   6   1   8    0.45    0.13   0
   6   2   6    8.57    0.12   0
   6   3   4    0.49    0.12   0
   6   4   3    2.10    0.11   0
   6   5   2   35.86    0.22   0
   6   7   1  163.46    0.46   0
   6   8   1   20.05    0.25   0
   6   9   1   12.55    0.25   0
   6  11   2    1.09    0.29   0
   7   1  13    1.57    0.19   0
   7   2   9    5.89    0.18   0
   7   3   7    8.66    0.15   0
   7   5   4  220.82    0.49   0
   7   7   3   13.18    0.24   0
   7   8   3   53.43    0.37   0
   7   9   3    0.05    0.25   0
   7  11   4   29.28    0.42   0
   8   2  15   16.33    0.28   0
   8   2  16    4.37    0.26   0
   8   2  17    0.85    0.24   0
   8   2  18   21.70    0.34   0
   8   2  19    1.57    0.30   0
   8   2  20    2.11    0.31   0
   8   3  11    8.26    0.23   0
   8   4   9    1.86    0.15   0
   8   6   6  160.35    0.49   0
   8   7   6   17.45    0.25   0
   8   8   6   37.40    0.35   0
   8   9   6    7.24    0.30   0
   8  10   6    5.45    0.34   0
   9   4  14    0.33    0.26   0
   9   4  15    3.88    0.32   0
   9   4  16    0.51    0.31   0
   9   4  17   13.10    0.38   0
   9   4  18   19.68    0.43   0
   9   5  13   -0.10    0.20   0
   9   7   9    7.52    0.28   0
   9   7  10   19.33    0.36   0
   9   8   9   21.38    0.38   0
   9   8  10    0.40    0.24   0
 -17  -2   5    4.06    0.33   0
 -17   1   0    8.91    0.37   0
 -16  -2   4   23.38    0.41   0
 -16  -1   2   42.57    0.45   0
 -15   0   0    4.45    0.31   0
 -15   4  -4   57.20    0.47   0
 -14  -5  12   18.44    0.35   0
 -14   1  -2    3.58    0.28   0
 -14   3  -4    1.31    0.25   0
 -14   5  -5    1.40    0.26   0
 -13  -5  11    2.11    0.25   0
 -13   4  -5    8.10    0.28   0
 -13   6  -6    1.41    0.22   0
 -12  -6  16    2.19    0.27   0
 -12  -5  10    0.51    0.24   0
 -12   1  -3    1.51    0.21   0
 -12   2  -4    3.44    0.21   0
 -12   3  -5    1.97    0.20   0
 -12   5  -6    8.31    0.25   0
 -11  -6  15    0.42    0.23   0
 -11  -4   6    4.57    0.21   0
 -11   4  -6   51.28    0.33   0
 -11   7  -7    1.06    0.19   0
 -11   8  -7    5.97    0.22   0
 -10  -6  15   -0.02    0.23   0
 -10  -3   3   29.27    0.24   0
 -10  -1  -1    0.79    0.17   0
 -10   6  -7   10.50    0.21   0
  -9  -6  15    1.69    0.22   0
  -9  -5   9   13.04    0.21   0
  -9   2  -5   13.29    0.18   0
  -8  -6  15    0.77    0.18   0
  -8  -5   9   32.12    0.23   0
  -8   1  -4  108.14    0.30   0
  -8   2  -5    1.93    0.12   0
  -8   5  -7   24.95    0.18   0
  -7   1  -4   23.32    0.16   0
  -7   2  -5  160.12    0.32   0
  -6  -6  17    4.89    0.14   0
  -6  -3   3   29.01    0.17   0
  -6   1  -4   71.83    0.21   0
  -6   2  -5  162.33    0.29   0
  -5  -6  22    8.15    0.15   0
  -5  -1  -1   76.77    0.20   0
  -1  -1   1   14.47    0.05   0
   0   8  -6   23.45    0.12   0
   1  -3   9   26.70    0.06   0
   1   6  -5   39.28    0.13   0
   1  10  -5    6.75    0.15   0
   1  12  -4    2.95    0.21   0
   2   2  -1  496.27    0.34   0
   2   4  -3    3.84    0.07   0
   2  12  -3    0.52    0.21   0
   3  -3  16   96.25    0.23   0
   3  -3  23    7.18    0.17   0
   3  -1   6   23.96    0.10   0
   3   3  -1   44.25    0.15   0
   3   4  -2   71.82    0.19   0
   3  12  -2    2.50    0.22   0
   4  -2  13   46.06    0.17   0
   4   6  -2   47.02    0.20   0
   4  10  -2   50.97    0.34   0
   5   1   5   80.19    0.23   0
   5   5   0  109.42    0.28   0
   5   7  -1    4.90    0.16   0
   5   8  -1   20.17    0.23   0
   5   9  -1   29.50    0.27   0
   6   0  11   -0.02    0.12   0
   6   6   1   20.12    0.21   0
   6  10   1    0.45    0.24   0
   7   1  12   33.23    0.25   0
   7   2   8  142.13    0.38   0
   7   3   6  131.10    0.36   0
   7   6   3   28.21    0.26   0
   7  10   3   21.93    0.37   0
   8   2  14    9.18    0.22   0
   8   3  10   52.15    0.31   0
   8   4   8  114.99    0.39   0
   8   5   6   70.11    0.33   0
   8   7   5    5.30    0.26   0
   8   8   5   -0.23    0.24   0
   8   9   5    2.57    0.29   0
   9   4  12    6.78    0.27   0
   9   4  13   20.29    0.34   0
   9   5  10   44.66    0.36   0
   9   5  11    7.81    0.23   0
   9   6   9    4.29    0.26   0
   9   7   8   15.28    0.30   0
   9   8   8    9.40    0.33   0
   9   9   8   30.24    0.44   0
 -17  -2   6   51.24    0.55   0
 -17  -1   4   29.91    0.45   0
 -17   0   2    0.47    0.36   0
 -16  -3   7    1.52    0.25   0
 -16  -2   5    0.61    0.29   0
 -16  -1   3    1.80    0.29   0
 -16   0   1    0.13    0.28   0
 -15  -4   9   -0.00    0.24   0
 -15  -1   2   22.41    0.40   0
 -15   1  -1    0.23    0.27   0
 -15   2  -2    0.79    0.28   0
 -15   3  -3    3.28    0.29   0
 -14  -1   1    8.33    0.23   0
 -13   0  -1   -0.07    0.22   0
 -13   7  -6    0.20    0.21   0
 -12  -5  11    5.72    0.25   0
 -12  -4   7   13.86    0.25   0
 -11  -6  16   37.01    0.39   0
 -11  -5  10    3.14    0.23   0
 -11   0  -2   28.65    0.24   0
 -11   1  -3    2.46    0.20   0
 -11   3  -5    0.16    0.17   0
 -10  -6  16   32.26    0.36   0
 -10  -5  10   61.44    0.39   0
 -10  -4   6   11.91    0.21   0
 -10  -2   1    1.38    0.13   0
 -10   4  -6    3.34    0.16   0
  -9  -6  16   10.38    0.26   0
  -9  -4   6   45.13    0.27   0
  -9  -3   3    0.56    0.11   0
  -9  -2   1    2.05    0.16   0
  -8  -6  16    6.54    0.21   0
  -8  -3   3    0.59    0.14   0
  -8  -1  -1   13.33    0.16   0
  -7  -6  16   46.40    0.27   0
  -7  -4   6   79.29    0.26   0
  -7  -3   3   59.32    0.23   0
  -7  -1  -1  156.48    0.33   0
  -7   5  -7   20.74    0.13   0
  -6  -6  18    0.53    0.13   0
  -6  -4   6  225.33    0.38   0
  -6  -2   1   20.23    0.15   0
  -6   5  -7   78.44    0.19   0
  -4  -4   7   44.33    0.16   0
  -3  -5  13    0.21    0.07   0
  -2   9  -7    5.95    0.07   0
  -1  11  -6   20.94    0.16   0
   0   7  -6  141.82    0.21   0
   0   9  -6   45.78    0.18   0
   1  -4  15    2.25    0.05   0
   2  -2   7  122.41    0.15   0
   2   0   2  263.35    0.21   0
   2  11  -4   25.08    0.26   0
   3  -3  15   15.87    0.13   0
   3   2   0   17.71    0.10   0
   3  11  -3   -0.17    0.18   0
   4  -1   8   23.24    0.13   0
   4   0   5   -0.00    0.08   0
   4   1   3    4.66    0.07   0
   4   3   0   28.31    0.15   0
   4   4  -1   70.70    0.21   0
   4  11  -2   13.75    0.24   0
   5  -1  11    5.27    0.12   0
   5   2   3    2.98    0.09   0
   5   6  -1   12.80    0.17   0
   5  10  -1    0.29    0.20   0
   6  -1  17    3.92    0.20   0
   6  -1  19    2.20    0.21   0
   6  -1  20   19.64    0.27   0
   6   1   7  162.55    0.34   0
   6   2   5  165.54    0.35   0
   6   4   2    2.55    0.14   0
   6   5   1   13.95    0.17   0
   6   7   0    4.35    0.17   0
   6   8   0   18.92    0.24   0
   6   9   0   10.82    0.23   0
   6  11   1   -0.21    0.27   0
   7   0  18   55.15    0.32   0
   7   0  19    0.59    0.21   0
   7   0  20   -0.05    0.25   0
   7   1  11   15.68    0.17   0
   7   4   4    0.34    0.15   0
   7   5   3   11.95    0.20   0
   7   7   2   68.96    0.35   0
   7   9   2   54.60    0.41   0
   7  10   2   15.23    0.32   0
   7  11   3   16.37    0.40   0
   8   2  12   21.58    0.26   0
   8   3   9    1.65    0.19   0
   8   4   7   60.40    0.33   0
   8   6   5    5.89    0.17   0
   8   7   4  117.88    0.46   0
   8   8   4   12.62    0.28   0
   8   9   4   38.19    0.37   0
   9   3  14    2.46    0.25   0
   9   3  16    5.30    0.30   0
   9   3  17    3.61    0.27   0
   9   3  18   10.33    0.33   0
   9   4  11   22.11    0.31   0
   9   5   9   20.05    0.29   0
   9   6   8   45.81    0.38   0
   9   7   7   38.97    0.36   0
   9   8   7   22.34    0.38   0
   9   9   7   17.95    0.40   0
  10   6  13    1.56    0.31   0
  10   6  14    2.14    0.37   0
 -17   1   1    0.05    0.30   0
 -16  -3   8    0.69    0.33   0
 -16   1   0    7.74    0.28   0
 -16   2  -1    0.53    0.31   0
 -16   3  -2    5.57    0.31   0
 -15  -4  10    0.95    0.33   0
 -15  -3   7    0.63    0.30   0
 -15   0   1    0.04    0.25   0
 -15   5  -4    1.17    0.28   0
 -14  -5  13    8.24    0.30   0
 -14  -4   9   11.13    0.32   0
 -14  -3   6   26.35    0.35   0
 -14   0   0   75.93    0.53   0
 -14   4  -4    0.22    0.25   0
 -14   6  -5    0.09    0.25   0
 -13  -4   8    6.42    0.28   0
 -13  -2   3    0.46    0.22   0
 -13  -1   1    1.55    0.23   0
 -13   1  -2   -0.13    0.21   0
 -13   2  -3   -0.21    0.22   0
 -13   3  -4   13.08    0.25   0
 -13   5  -5    2.73    0.24   0
 -12   0  -1   -0.39    0.21   0
 -12   4  -5   -0.02    0.19   0
 -12   6  -6    7.86    0.22   0
 -11  -6  17    7.34    0.29   0
 -11  -6  18   14.47    0.33   0
 -11  -4   7   39.49    0.29   0
 -11  -3   4   -0.10    0.14   0
 -11  -2   2    0.22    0.17   0
 -11  -1   0   27.46    0.25   0
 -11   2  -4   39.46    0.28   0
 -11   5  -6    3.21    0.18   0
 -10  -6  17    0.22    0.20   0
 -10   0  -2   20.23    0.19   0
 -10   3  -5    1.44    0.16   0
 -10   7  -7   27.48    0.23   0
 -10   8  -7    0.97    0.16   0
 -10   9  -7   15.04    0.24   0
  -9  -6  17    5.88    0.22   0
  -9  -5  10   73.19    0.36   0
  -9   0  -2   -0.10    0.14   0
  -9   4  -6  202.25    0.39   0
  -9   6  -7   74.58    0.29   0
  -8  -6  17   -0.19    0.18   0
  -7  -6  17   13.71    0.18   0
  -7  -6  18    7.19    0.19   0
  -7  -5  10    1.29    0.13   0
  -7  -2   1    7.95    0.13   0
  -6  -6  19    3.33    0.15   0
  -6  -6  20    0.18    0.14   0
  -5  -5  11   25.47    0.15   0
  -4  -5  12   45.83    0.17   0
  -4  -3   4  231.51    0.31   0
  -4   0  -2  286.98    0.32   0
  -3  -4   8    9.00    0.08   0
  -3  -2   2  586.89    0.40   0
  -3  -1   0  146.93    0.20   0
  -2  -4   9   95.61    0.15   0
  -2  12  -6    2.60    0.13   0
   0  10  -6    0.13    0.11   0
   0  12  -5    0.37    0.14   0
   1   4  -4   64.85    0.12   0
   1  11  -5    9.34    0.19   0
   2  -3  11   24.91    0.09   0
   2   5  -4  153.03    0.24   0
   3  -2   9   49.66    0.13   0
   3   5  -3    9.83    0.11   0
   3   8  -4    0.68    0.11   0
   4  -2  12   72.00    0.20   0
   4   2   1    1.88    0.09   0
   4   5  -2   17.06    0.14   0
   4   8  -3    0.32    0.13   0
   4   9  -3    7.34    0.16   0
   5  -2  19    9.42    0.19   0
   5  -2  20    3.52    0.18   0
   5   0   7   -0.08    0.09   0
   5   4   0    3.67    0.12   0
   5  11  -1   13.58    0.27   0
   6  -1  15   -0.12    0.15   0
   6  -1  16   44.23    0.26   0
   6  -1  21    0.17    0.20   0
   6  -1  22   59.60    0.40   0
   6   3   3   18.65    0.17   0
   6   6   0   11.89    0.17   0
   6  10   0    7.10    0.25   0
   7   0  15   -0.22    0.17   0
   7   0  21    0.24    0.23   0
   7   1  10    5.35    0.16   0
   7   2   7   14.44    0.18   0
   7   3   5   20.89    0.19   0
   7   6   2   10.70    0.21   0
   7  11   2    2.59    0.29   0
   8   1  15   -0.34    0.18   0
   8   1  16   10.95    0.23   0
   8   1  17    2.66    0.23   0
   8   1  18    0.29    0.25   0
   8   1  19    3.52    0.27   0
   8   1  20    8.47    0.30   0
   8   2  11   56.05    0.32   0
   8   3   8   89.36    0.36   0
   8   4   6  384.16    0.64   0
   8   6   4   97.76    0.39   0
   9   3  13    1.35    0.25   0
   9   4  10    0.15    0.23   0
   9   5   8   23.26    0.30   0
   9   6   7   87.44    0.45   0
   9   7   6    0.71    0.23   0
   9   8   6   66.44    0.45   0
   9   9   6    0.78    0.33   0
  10   5  13    0.65    0.30   0
  10   5  14    0.99    0.34   0
  10   5  15    3.26    0.33   0
  10   6  11    3.56    0.28   0
  10   6  12    9.40    0.34   0
  10   7  10    9.94    0.31   0
  10   7  11   -0.11    0.28   0
  10   8  10    8.60    0.37   0
 -17  -2   7    3.30    0.34   0
 -17  -1   5    0.21    0.34   0
 -17   0   3   -0.13    0.32   0
 -16  -3   9    7.92    0.35   0
 -16  -2   6    1.43    0.31   0
 -16  -1   4   32.38    0.45   0
 -16   0   2    1.74    0.30   0
 -15  -4  11    0.39    0.32   0
 -15  -1   3    2.02    0.27   0
 -15   1   0    8.88    0.30   0
 -15   4  -3    0.67    0.29   0
 -14  -5  14   20.29    0.37   0
 -14  -4  10   12.25    0.35   0
 -14  -2   4    1.63    0.23   0
 -14   2  -2    0.60    0.25   0
 -14   3  -3   36.00    0.41   0
 -13  -5  13    2.47    0.28   0
 -13   0   0   29.19    0.35   0
 -12  -5  12    3.88    0.25   0
 -12  -4   8    3.70    0.24   0
 -12  -3   5   28.91    0.29   0
 -12  -1   1   59.30    0.32   0
 -12   1  -2  326.20    0.63   0
 -12   3  -4    0.16    0.19   0
 -12   7  -6    2.40    0.21   0
 -10  -6  18    0.36    0.20   0
 -10  -6  19    8.34    0.28   0
 -10  -5  11    4.35    0.21   0
 -10  -4   7    9.07    0.21   0
 -10  -3   4    1.35    0.14   0
 -10  -2   2    0.23    0.16   0
 -10  -1   0   34.33    0.25   0
 -10   2  -4  108.89    0.36   0
  -9  -6  18    0.07    0.22   0
  -9  -5  11    1.48    0.18   0
  -9  -4   7    0.65    0.15   0
  -9   7  -7   27.73    0.22   0
  -8  -6  18    4.54    0.22   0
  -8   0  -2   24.75    0.18   0
  -8   4  -6  354.92    0.48   0
  -8   6  -7    0.54    0.13   0
  -7  -6  19    5.92    0.21   0
  -6  -6  21   -0.01    0.13   0
  -6  -5  11   12.15    0.13   0
  -5  -4   7   24.09    0.14   0
  -5  -3   4  186.32    0.32   0
  -5   0  -2   87.65    0.21   0
  -4   4  -6   11.51    0.08   0
  -4   6  -7    0.06    0.04   0
  -3   1  -3   67.29    0.13   0
  -2  -5  16   94.73    0.18   0
   2  -1   4  382.54    0.25   0
   2   8  -5  128.95    0.29   0
   2   9  -5    3.70    0.14   0
   2  12  -4   12.48    0.26   0
   3  -3  14   33.59    0.13   0
   3   0   3    0.20    0.06   0
   3   7  -4   81.45    0.24   0
   3  12  -3    0.08    0.20   0
   4   7  -3    0.69    0.12   0
   4  10  -3    0.09    0.18   0
   4  12  -2   15.25    0.28   0
   5  -2  17    0.52    0.13   0
   5  -2  18   54.08    0.26   0
   5  -2  21    2.29    0.17   0
   5  -2  22   46.76    0.37   0
   5  -1  10   68.14    0.21   0
   5   1   4    4.19    0.12   0
   5   3   1    4.17    0.09   0
   5   5  -1   35.26    0.19   0
   5   7  -2    5.04    0.15   0
   5   8  -2    0.61    0.16   0
   5   9  -2    9.82    0.19   0
   5  10  -2    8.21    0.24   0
   6  -1  14   52.38    0.23   0
   6   1   6   38.01    0.18   0
   6   2   4   44.82    0.21   0
   6  11   0   12.32    0.32   0
   7   0  13    0.17    0.16   0
   7   0  14    0.79    0.16   0
   7   4   3  110.88    0.34   0
   7   5   2    3.92    0.17   0
   7   7   1   37.06    0.28   0
   7   8   1   10.85    0.24   0
   7   9   1    0.39    0.22   0
   7  10   1    1.73    0.26   0
   8   1  14   25.43    0.26   0
   8   3   7    5.62    0.19   0
   8   7   3    2.66    0.22   0
   8   8   3   12.50    0.24   0
   8   9   3   14.76    0.31   0
   8  10   3    1.41    0.28   0
   9   2  16    9.61    0.31   0
   9   2  17    3.11    0.27   0
   9   2  18   44.74    0.46   0
   9   2  19    1.50    0.32   0
   9   4   9    8.78    0.23   0
   9   5   7    0.54    0.22   0
   9   6   6   17.00    0.28   0
   9   8   5   31.52    0.36   0
   9   9   5    9.85    0.33   0
  10   4  14    0.30    0.27   0
  10   4  15    2.02    0.32   0
  10   4  16   20.05    0.43   0
  10   5  11    0.42    0.24   0
  10   5  12   21.07    0.38   0
  10   6  10    6.43    0.31   0
  10   7   9   20.57    0.37   0
  10   8   9    3.86    0.32   0
 -17   1   2   15.23    0.40   0
 -17   2   1    1.71    0.37   0
 -16   1   1   -0.08    0.30   0
 -16   2   0    2.63    0.31   0
 -16   3  -1    0.14    0.30   0
 -15  -4  12   -0.09    0.31   0
 -15   2  -1   11.34    0.33   0
 -15   3  -2    9.58    0.30   0
 -14  -3   7    3.08    0.27   0
 -14   0   1    0.29    0.26   0
 -14   5  -4    4.47    0.28   0
 -13  -5  14   16.26    0.36   0
 -13   1  -1    3.13    0.22   0
 -13   4  -4    7.40    0.25   0
 -13   6  -5   -0.02    0.19   0
 -12  -5  13   13.39    0.29   0
 -12  -4   9   39.46    0.39   0
 -12   2  -3    1.87    0.16   0
 -11  -5  12   63.03    0.39   0
 -11  -3   5    9.16    0.23   0
 -11   0  -1   -0.08    0.13   0
 -11   4  -5    3.19    0.17   0
 -11   6  -6   70.73    0.37   0
 -10   5  -6   53.25    0.31   0
  -9  -6  19    3.60    0.22   0
  -9  -6  20    0.19    0.23   0
  -9  -2   2  325.55    0.53   0
  -9  -1   0  319.43    0.53   0
  -9   1  -3   11.40    0.13   0
  -9   2  -4   81.95    0.28   0
  -9   3  -5  101.82    0.32   0
  -9   8  -7   20.74    0.20   0
  -9   9  -7   12.95    0.17   0
  -8  -6  19   36.36    0.35   0
  -8  -6  20    2.64    0.21   0
  -8  -6  21   -0.08    0.19   0
  -8  -5  11   11.17    0.17   0
  -8  -4   7   31.25    0.21   0
  -8  -3   4   96.89    0.31   0
  -8  10  -7   10.80    0.16   0
  -7  -4   7   64.30    0.24   0
  -7  -3   4    4.70    0.13   0
  -7   0  -2    1.12    0.09   0
  -6  -4   7   45.02    0.19   0
  -6  -3   4   79.68    0.24   0
  -6   0  -2   51.23    0.19   0
  -6   6  -7   17.19    0.12   0
  -5  -5  12    0.03    0.11   0
  -5   4  -6    1.86    0.08   0
  -5   6  -7    6.30    0.08   0
  -4  -2   2   52.85    0.16   0
  -4  -1   0  123.44    0.22   0
  -3  -5  14   31.55    0.13   0
  -3  -3   5    8.00    0.08   0
  -2  10  -7    5.43    0.08   0
   2   1   0   64.70    0.12   0
   2   7  -5   16.62    0.13   0
   3   1   1   41.18    0.12   0
   3  11  -4    2.77    0.20   0
   4  -2  11    0.30    0.08   0
   4  -1   7   70.49    0.18   0
   4   6  -3    0.48    0.10   0
   4  11  -3    0.84    0.21   0
   5  -2  15    0.25    0.13   0
   5  -2  23    3.58    0.20   0
   5   0   6    6.74    0.11   0
   5   2   2   25.86    0.15   0
   6  -1  13   45.39    0.21   0
   6   4   1   26.40    0.18   0
   6   5   0   79.48    0.28   0
   6   7  -1    2.21    0.16   0
   6   8  -1   55.70    0.33   0
   6   9  -1   13.13    0.23   0
   6  10  -1   45.78    0.34   0
   7   0  12  199.73    0.43   0
   7   2   6   34.15    0.21   0
   7   3   4   97.86    0.30   0
   7  11   1    6.55    0.31   0
   8   1  12   97.52    0.37   0
   8   1  13    1.37    0.18   0
   8   2   9   14.98    0.21   0
   8   4   5   66.66    0.31   0
   8   5   4  156.11    0.43   0
   8   8   2   31.75    0.32   0
   8   9   2    0.39    0.25   0
   9   2  14    1.08    0.23   0
   9   2  15   12.08    0.28   0
   9   4   8   13.60    0.23   0
   9   5   6   20.77    0.25   0
   9   6   5    7.51    0.22   0
   9   7   5    0.74    0.23   0
   9  10   5    3.46    0.36   0
  10   4  12    0.19    0.25   0
  10   5  10   51.01    0.38   0
  10   6   9   27.81    0.36   0
  10   7   8    3.16    0.30   0
  10   8   8    0.33    0.23   0
 -17  -1   6    2.01    0.30   0
 -17   0   4   -0.17    0.25   0
 -16  -3  10    6.24    0.36   0
 -16  -2   7    0.64    0.22   0
 -16  -1   5    1.27    0.29   0
 -16   0   3    0.29    0.27   0
 -15  -4  13   15.47    0.36   0
 -15  -3   9    0.27    0.31   0
 -15  -2   6    0.08    0.24   0
 -15   0   2    3.01    0.21   0
 -15   5  -3    3.41    0.30   0
 -14  -4  11    4.40    0.28   0
 -14   1   0    7.06    0.29   0
 -14   4  -3    0.13    0.25   0
 -13  -5  15   10.15    0.35   0
 -13  -4  10    0.75    0.23   0
 -13   2  -2   11.37    0.26   0
 -13   3  -3    0.01    0.19   0
 -13   7  -5    0.19    0.22   0
 -12  -3   6   52.34    0.34   0
 -12   0   0  273.04    0.62   0
 -11  -5  13    0.19    0.20   0
 -11   2  -3    4.59    0.19   0
 -11   3  -4    0.05    0.17   0
 -11   7  -6    9.75    0.20   0
 -10  -4   8    0.09    0.18   0
 -10  -3   5    0.26    0.17   0
 -10   0  -1    0.02    0.16   0
 -10   4  -5   67.88    0.31   0
  -9  -5  12   10.44    0.18   0
  -9   5  -6   19.55    0.16   0
  -8  -5  12   15.41    0.20   0
  -8  -2   2  505.25    0.62   0
  -8  -1   0  261.58    0.43   0
  -8   3  -5    2.16    0.12   0
  -8   7  -7    9.09    0.13   0
  -7  -2   2  362.35    0.49   0
  -7  -1   0   89.49    0.26   0
  -7   1  -3   36.44    0.18   0
  -6   4  -6    0.18    0.08   0
  -5  -2   2   97.75    0.23   0
  -5  -1   0  100.96    0.22   0
  -4  -5  13    9.38    0.11   0
  -4  -4   8    1.30    0.08   0
  -4   1  -3    3.90    0.07   0
  -3   2  -4   13.92    0.07   0
  -1  12  -6    1.26    0.13   0
   0   6  -6   12.05    0.07   0
   0  11  -6    1.29    0.13   0
   1   8  -6    7.34    0.11   0
   1   9  -6   88.11    0.25   0
   1  12  -5    2.55    0.18   0
   3  -3  13   30.85    0.12   0
   3   6  -4   15.63    0.12   0
   4   1   2  516.47    0.44   0
   5  -2  14   45.11    0.20   0
   5  -1   9  106.94    0.24   0
   5   6  -2  309.39    0.49   0
   6  -1  12    3.70    0.13   0
   6   0   8  120.10    0.29   0
   6   6  -1    0.37    0.15   0
   6  11  -1    5.67    0.26   0
   7   1   8   42.72    0.20   0
   7   7   0   20.02    0.24   0
   7   8   0   10.77    0.24   0
   7  10   0   41.83    0.35   0
   8   1  11    8.86    0.20   0
   8   2   8   84.07    0.33   0
   8   3   6  120.21    0.38   0
   8   7   2   47.79    0.34   0
   8  10   2    0.57    0.27   0
   9   2  13    2.66    0.18   0
   9   3   9   10.35    0.23   0
   9   4   7   51.10    0.32   0
   9   7   4   52.94    0.39   0
   9   8   4    2.77    0.26   0
   9   9   4    7.59    0.31   0
   9  10   4    2.75    0.32   0
  10   3  14   13.53    0.31   0
  10   3  16   10.11    0.34   0
  10   3  17   -0.24    0.27   0
  10   4  11    0.89    0.27   0
  10   5   9    9.50    0.28   0
  10   6   8   51.81    0.45   0
  10   7   7   32.37    0.41   0
  10   8   7    1.40    0.23   0
  10   9   7   18.49    0.38   0
  11   6  12    1.42    0.31   0
  11   7  11    4.47    0.37   0
 -17  -1   7    0.24    0.32   0
 -17   0   5    0.48    0.30   0
 -17   1   3    1.07    0.33   0
 -17   2   2    9.71    0.42   0
 -16  -3  11   10.47    0.40   0
 -16  -2   8    4.35    0.33   0
 -16   1   2   46.12    0.55   0
 -16   2   1    0.00    0.28   0
 -16   4  -1    0.46    0.30   0
 -15  -2   7    2.88    0.26   0
 -15   1   1    5.41    0.24   0
 -15   2   0    0.57    0.27   0
 -15   3  -1   16.66    0.35   0
 -15   4  -2    3.63    0.30   0
 -14  -4  12    7.39    0.32   0
 -14   0   2    5.77    0.26   0
 -14   2  -1    2.31    0.24   0
 -14   3  -2   -0.15    0.21   0
 -13  -5  16   15.61    0.38   0
 -13  -4  11   21.38    0.37   0
 -13  -2   5    0.09    0.22   0
 -13   0   1   -0.25    0.22   0
 -13   5  -4   11.98    0.26   0
 -12  -5  15   -0.03    0.25   0
 -12  -4  10    9.56    0.25   0
 -12  -1   2   17.41    0.25   0
 -12   1  -1    5.78    0.21   0
 -12   4  -4   13.25    0.24   0
 -12   6  -5    1.08    0.19   0
 -11  -5  14    3.31    0.22   0
 -11  -4   9    4.70    0.20   0
 -11  -3   6   42.02    0.29   0
 -11   5  -5    0.10    0.16   0
 -11   8  -6    4.94    0.19   0
 -10  -5  13    1.07    0.19   0
 -10  -2   3   10.30    0.19   0
 -10  -1   1   79.15    0.31   0
 -10   1  -2   20.04    0.21   0
 -10   3  -4   81.75    0.33   0
 -10   6  -6   21.91    0.23   0
  -9  -4   8    0.08    0.15   0
  -9  -3   5   22.11    0.21   0
  -9   0  -1   -0.22    0.14   0
  -8   9  -7   12.79    0.15   0
  -7  -5  12   10.58    0.15   0
  -7   2  -4   31.28    0.16   0
  -7   3  -5   20.00    0.14   0
  -7   7  -7    2.40    0.11   0
  -6  -2   2   52.20    0.18   0
  -6  -1   0    2.40    0.08   0
  -6   1  -3   90.04    0.23   0
  -6   3  -5   16.51    0.13   0
  -5   1  -3   80.57    0.19   0
  -4  -3   5  166.92    0.27   0
  -4   3  -5   10.38    0.09   0
  -2  -2   3  243.91    0.21   0
  -2   0  -1    0.04    0.03   0
   1   5  -5    0.94    0.06   0
   1  10  -6    1.71    0.12   0
   2  -4  20  103.21    0.26   0
   2  -4  21    8.88    0.11   0
   2   6  -5  120.53    0.23   0
   2  11  -5    0.99    0.15   0
   3  -2   8  441.67    0.34   0
   3  -1   5   36.38    0.11   0
   3   3  -2    3.17    0.08   0
   3   4  -3   11.46    0.11   0
   4  -3  18    6.05    0.13   0
   4  -3  19    0.17    0.12   0
   4  -3  20   52.31    0.24   0
   4  -3  22    0.17    0.14   0
   4  -2  10  279.78    0.34   0
   4   0   4  375.29    0.37   0
   4   3  -1    5.93    0.11   0
   4   4  -2  377.80    0.43   0
   4   8  -4   21.33    0.17   0
   4   9  -4   24.06    0.21   0
   5   4  -1   11.96    0.14   0
   5   8  -3   32.24    0.22   0
   5   9  -3    1.15    0.16   0
   6   1   5    0.70    0.11   0
   6   2   3  297.68    0.44   0
   6   8  -2   76.74    0.35   0
   6   9  -2    8.34    0.21   0
   7  -1  19    0.27    0.18   0
   7  -1  20   23.52    0.28   0
   7  -1  21    0.37    0.24   0
   7   1   7    6.16    0.15   0
   7   2   5  168.44    0.38   0
   7   3   3   -0.04    0.13   0
   7   4   2   43.86    0.23   0
   7   5   1   13.29    0.19   0
   7  11   0    5.28    0.31   0
   8   0  16    4.92    0.21   0
   8   0  17    0.40    0.19   0
   8   0  19    0.09    0.22   0
   8   0  20    4.27    0.25   0
   8   1  10   39.81    0.25   0
   8   4   4   10.72    0.16   0
   8   6   2    7.22    0.22   0
   8   8   1   13.11    0.25   0
   8   9   1   17.98    0.30   0
   8  10   1    4.44    0.29   0
   9   1  17    9.42    0.31   0
   9   1  19    2.45    0.28   0
   9   3   8   67.86    0.34   0
   9   4   6  214.95    0.52   0
   9   5   5    5.79    0.21   0
   9   6   4   48.13    0.34   0
   9   8   3   11.99    0.28   0
   9   9   3    0.20    0.27   0
   9  10   3    0.37    0.28   0
  10   3  12   91.31    0.47   0
  10   4  10   39.32    0.36   0
  10   6   7   12.81    0.29   0
  10   7   6    1.56    0.28   0
  10   9   6    9.91    0.33   0
  11   5  13    0.60    0.32   0
  11   6  11    1.40    0.30   0
  11   7  10   13.41    0.41   0
 -16   0   4   13.15    0.33   0
 -16   3   0   35.59    0.39   0
 -15  -3  10   23.34    0.37   0
 -15   0   3   -0.37    0.24   0
 -14  -4  13    1.01    0.28   0
 -14  -3   9   -0.11    0.27   0
 -14  -1   4    3.78    0.25   0
 -14   5  -3    8.75    0.29   0
 -13  -4  12    0.27    0.23   0
 -13  -3   8  130.04    0.57   0
 -13  -1   3    3.76    0.18   0
 -13   1   0  261.13    0.63   0
 -13   4  -3   35.29    0.29   0
 -12  -5  16    0.23    0.26   0
 -12  -4  11   -0.05    0.21   0
 -12  -3   7    0.09    0.15   0
 -12   2  -2   14.16    0.23   0
 -12   3  -3    1.37    0.18   0
 -12   7  -5    0.22    0.21   0
 -11  -5  15    1.65    0.23   0
 -11  -4  10    0.15    0.20   0
 -11  -2   4    9.94    0.20   0
 -11   0   0    9.99    0.17   0
 -10  -5  14    9.36    0.21   0
 -10  -4   9    1.07    0.17   0
 -10  -3   6    1.78    0.18   0
 -10   2  -3    0.57    0.15   0
  -9  -5  13    0.00    0.15   0
  -9  -2   3   16.02    0.18   0
  -9  -1   1  125.64    0.34   0
  -9   4  -5    5.88    0.14   0
  -9   6  -6   13.01    0.18   0
  -8  -5  13    8.25    0.16   0
  -8  -3   5    3.90    0.11   0
  -8   0  -1    0.03    0.12   0
  -8   5  -6   62.57    0.22   0
  -7  -5  13    0.52    0.13   0
  -7  -4   8    6.51    0.13   0
  -7  -3   5    5.20    0.13   0
  -7   8  -7    0.26    0.10   0
  -6  -5  13   -0.04    0.13   0
  -6  -4   8   14.00    0.13   0
  -6  -3   5    2.37    0.11   0
  -6   2  -4   44.08    0.17   0
  -6   7  -7    2.77    0.09   0
  -5  -5  13   22.19    0.14   0
  -5  -3   5  154.84    0.28   0
  -5   2  -4   44.26    0.15   0
  -5   3  -5    0.07    0.07   0
  -4  -5  14   64.02    0.20   0
  -4   2  -4   65.12    0.14   0
  -3  -5  15    8.24    0.10   0
  -3  -4   9    0.99    0.06   0
  -3   7  -7    4.71    0.03   0
  -2  -3   6  186.97    0.20   0
  -1   8  -7    3.38    0.06   0
  -1   9  -7   14.29    0.09   0
   1  -4  14   42.62    0.07   0
   1   1  -1   14.67    0.05   0
   1   7  -6   72.44    0.18   0
   2  -4  18    4.38    0.08   0
   2  -4  19   26.83    0.13   0
   2  -4  22    0.17    0.09   0
   2  -4  23    0.04    0.10   0
   3   8  -5    9.47    0.14   0
   3   9  -5   50.84    0.24   0
   3  12  -4   19.49    0.29   0
   4  -3  17    6.00    0.12   0
   4  -3  23    0.77    0.15   0
   4   5  -3    1.71    0.10   0
   4   7  -4  189.91    0.36   0
   4  10  -4   12.57    0.21   0
   5  -2  13  196.54    0.34   0
   5  -1   8    0.08    0.10   0
   5   1   3   81.48    0.22   0
   5   5  -2    1.48    0.11   0
   5   7  -3    7.21    0.15   0
   5  11  -3    0.14    0.22   0
   6  -1  11   85.82    0.26   0
   6   0   7   -0.04    0.11   0
   6   4   0  120.40    0.30   0
   6   5  -1    8.79    0.15   0
   6   7  -2    5.02    0.16   0
   6  10  -2    9.85    0.25   0
   7  -1  15    4.16    0.18   0
   7  -1  17   15.72    0.22   0
   7   0  10    0.07    0.14   0
   7   6   0   10.38    0.16   0
   7   8  -1   41.35    0.29   0
   7   9  -1   23.83    0.26   0
   7  10  -1    3.92    0.27   0
   8   0  14  158.40    0.44   0
   8   2   7   40.28    0.23   0
   8   3   5    1.92    0.13   0
   8   5   2  268.81    0.53   0
   8   7   1    0.97    0.20   0
   8  11   1    2.37    0.33   0
   9   1  14    2.08    0.22   0
   9   1  15    0.61    0.22   0
   9   3   7    1.25    0.17   0
   9   7   3    6.07    0.21   0
  10   2  17   14.31    0.34   0
  10   2  18   24.65    0.43   0
  10   4   9    0.54    0.22   0
  10   5   7   40.45    0.35   0
  10   6   6   28.65    0.33   0
  10   7   5    3.75    0.26   0
  10   8   5    0.56    0.26   0
  10   9   5    4.43    0.34   0
  11   4  15    0.61    0.35   0
  11   5  11    0.55    0.31   0
  11   5  12    1.01    0.23   0
  11   6   9    1.32    0.27   0
  11   6  10    0.64    0.23   0
  11   7   8    6.72    0.31   0
  11   7   9    2.44    0.25   0
  11   8   8    3.45    0.36   0
 -17  -1   8    3.09    0.32   0
 -17   0   6   34.00    0.50   0
 -17   1   4   29.58    0.42   0
 -17   2   3    3.49    0.36   0
 -16  -2   9    4.37    0.26   0
 -16  -1   7    2.13    0.30   0
 -16   0   5    0.18    0.26   0
 -16   1   3    2.07    0.29   0
 -15  -3  11   -0.02    0.31   0
 -15  -2   8   61.35    0.49   0
 -15   1   2   29.54    0.41   0
 -15   4  -1    1.27    0.24   0
 -15   5  -2    3.91    0.28   0
 -14  -4  14    1.93    0.29   0
 -14  -2   7    2.55    0.26   0
 -14   1   1    9.29    0.24   0
 -14   2   0    0.11    0.24   0
 -14   3  -1    1.57    0.24   0
 -14   4  -2    1.67    0.26   0
 -13  -3   9   22.25    0.33   0
 -13   0   2   38.87    0.39   0
 -13   2  -1    2.14    0.21   0
 -13   6  -4    4.54    0.22   0
 -12  -5  17   49.63    0.44   0
 -12  -3   8    9.23    0.23   0
 -12  -2   5   46.25    0.32   0
 -12  -1   3    4.77    0.20   0
 -12   0   1   -0.03    0.14   0
 -12   8  -5    0.21    0.19   0
 -11  -5  16   -0.16    0.22   0
 -11  -3   7    1.71    0.19   0
 -11   4  -4   51.22    0.30   0
 -11   6  -5    3.45    0.21   0
 -10  -5  15   -0.09    0.19   0
 -10  -4  10   14.47    0.23   0
 -10   0   0   39.39    0.23   0
 -10   5  -5    7.02    0.16   0
 -10   8  -6   12.05    0.21   0
 -10   9  -6   10.30    0.21   0
  -9  -5  14   26.03    0.23   0
  -9  -4   9    0.43    0.15   0
  -9  -3   6    6.21    0.19   0
  -9   2  -3    1.06    0.13   0
  -9   3  -4   67.57    0.25   0
  -8  -4   9   17.75    0.18   0
  -8  -2   3   59.80    0.24   0
  -8  -1   1   13.72    0.16   0
  -7   0  -1   -0.22    0.11   0
  -7   5  -6  268.15    0.39   0
  -7   9  -7    1.82    0.11   0
  -6  10  -7   15.28    0.12   0
  -2  -4  10  380.31    0.30   0
  -2  -1   1  100.85    0.13   0
  -1  -4  11   49.43    0.09   0
  -1  10  -7   55.76    0.17   0
   0  12  -6    1.81    0.14   0
   1  11  -6    0.94    0.14   0
   2  -3  10   11.69    0.06   0
   2   3  -3   10.98    0.08   0
   2  12  -5    8.79    0.22   0
   3  -3  12  398.29    0.34   0
   3   2  -1   14.17    0.09   0
   3   5  -4   91.57    0.21   0
   3   7  -5   65.32    0.22   0
   4  -3  16   17.38    0.14   0
   4  -1   6   68.61    0.17   0
   4  11  -4    3.15    0.19   0
   5  -2  12   10.32    0.13   0
   5   0   5    0.33    0.10   0
   5   2   1  184.62    0.31   0
   5   6  -3   23.93    0.18   0
   6  -2  17    0.17    0.16   0
   6  -2  18    7.80    0.18   0
   6  -2  19    0.22    0.15   0
   6  -2  20   72.21    0.36   0
   6  -2  21    7.65    0.24   0
   6  -2  22   22.95    0.31   0
   6  -1  10   41.31    0.20   0
   6   3   1   55.12    0.20   0
   6  11  -2    3.05    0.24   0
   7  -1  14  333.70    0.53   0
   7   0   9    0.17    0.13   0
   7   1   6  107.89    0.30   0
   7   2   4   31.64    0.19   0
   7   4   1   36.15    0.21   0
   7   5   0   79.29    0.30   0
   7   7  -1   11.72    0.21   0
   8   0  13   -0.26    0.17   0
   8   1   9    0.32    0.16   0
   8   2   6  383.25    0.58   0
   8   4   3    1.98    0.12   0
   8   6   1    2.06    0.19   0
   8   8   0    1.23    0.22   0
   8   9   0   55.84    0.36   0
   8  10   0   -0.10    0.23   0
   9   1  13    0.30    0.20   0
   9   2   9    3.47    0.20   0
   9   4   5    5.86    0.20   0
   9   6   3    8.54    0.18   0
   9   7   2    8.92    0.25   0
   9   8   2   -0.03    0.24   0
   9   9   2   17.36    0.34   0
   9  10   2    0.68    0.28   0
  10   2  15    0.83    0.24   0
  10   3  10    8.17    0.26   0
  10   4   8   13.10    0.25   0
  10   5   6   80.78    0.39   0
  10   6   5   13.30    0.27   0
  10   8   4   39.59    0.42   0
  10   9   4   11.87    0.39   0
  11   4  12    3.23    0.30   0
  11   4  13    1.71    0.25   0
  11   5  10   43.88    0.45   0
  11   6   8   52.98    0.40   0
  11   7   7    1.69    0.29   0
  11   8   7    6.92    0.38   0
 -17   1   5    0.34    0.33   0
 -16  -2  10    0.73    0.32   0
 -16   2   2   -0.26    0.23   0
 -16   4   0    3.74    0.29   0
 -15  -3  12   -0.23    0.31   0
 -15   0   4    6.15    0.23   0
 -15   2   1    0.14    0.19   0
 -15   3   0   11.20    0.34   0
 -14  -4  15    7.80    0.34   0
 -14  -1   5    0.34    0.22   0
 -14   0   3    0.07    0.17   0
 -14   6  -3    1.37    0.22   0
 -13  -4  13    2.85    0.20   0
 -13  -1   4   99.16    0.46   0
 -13   5  -3    3.75    0.23   0
 -13   7  -4    2.52    0.23   0
 -12  -5  18    1.02    0.23   0
 -12  -4  12    2.48    0.24   0
 -12   1   0   74.32    0.36   0
 -12   4  -3    0.38    0.18   0
 -11  -5  17    5.16    0.25   0
 -11  -4  11   34.65    0.31   0
 -11   0   1   -0.39    0.16   0
 -11   2  -2    0.26    0.12   0
 -11   3  -3    4.46    0.14   0
 -10  -5  16   31.93    0.32   0
 -10  -3   7    0.05    0.17   0
 -10  -2   4   60.34    0.27   0
 -10  -1   2  199.85    0.45   0
  -9  -5  15    0.13    0.17   0
  -9   7  -6    0.58    0.14   0
  -8  -5  14    3.13    0.15   0
  -8  -3   6  108.10    0.31   0
  -8   1  -2   40.60    0.20   0
  -8   4  -5   64.26    0.23   0
  -8   6  -6  136.35    0.33   0
  -7  -5  14   72.85    0.27   0
  -7  -4   9    3.71    0.12   0
  -7  -2   3   86.56    0.25   0
  -7  -1   1   88.21    0.25   0
  -6  -5  14   14.26    0.16   0
  -6  -4   9    1.07    0.12   0
  -6   0  -1   -0.24    0.11   0
  -6   5  -6   96.58    0.22   0
  -5  -5  14  130.48    0.28   0
  -5  -4   9   20.63    0.15   0
  -4  -4   9   39.98    0.14   0
  -4   7  -7   21.28    0.08   0
  -3  -2   3    3.06    0.07   0
  -3   0  -1    0.11    0.04   0
  -2  11  -7   14.23    0.10   0
   2  -4  17    2.58    0.07   0
   2   4  -4   75.89    0.15   0
   2   9  -6    0.11    0.12   0
   3  11  -5   64.26    0.33   0
   4  -3  15   12.39    0.12   0
   4   6  -4   53.92    0.20   0
   4  12  -4   -0.01    0.22   0
   5   9  -4   13.45    0.21   0
   6  -2  16   68.23    0.27   0
   6   1   4   74.67    0.23   0
   6   2   2    4.79    0.13   0
   6   6  -2   25.53    0.19   0
   6   9  -3  105.68    0.40   0
   7  -1  13    1.10    0.14   0
   7   3   2   60.57    0.24   0
   7   6  -1   13.02    0.20   0
   8   0  12   98.74    0.35   0
   8   1   8   29.60    0.22   0
   8   3   4   73.47    0.27   0
   8   7   0   17.65    0.24   0
   8  11   0   -0.20    0.29   0
   9   1  12   45.84    0.31   0
   9   2   8    0.50    0.18   0
   9   3   6   10.07    0.20   0
   9   6   2   75.21    0.37   0
   9   9   1    1.95    0.24   0
  10   2  13    7.93    0.22   0
  10   3   9    0.13    0.23   0
  10   4   7   23.71    0.28   0
  10   7   4    2.44    0.20   0
  10   8   3    1.88    0.26   0
  10   9   3    5.21    0.33   0
  11   3  14    2.22    0.29   0
  11   3  15    1.15    0.30   0
  11   3  16   -0.06    0.23   0
  11   4  10   32.29    0.36   0
  11   4  11    5.16    0.27   0
  11   5   9   21.55    0.31   0
  11   6   7   39.68    0.37   0
  11   7   6    8.35    0.31   0
  11   8   6    3.96    0.34   0
 -17   0   7    0.01    0.24   0
 -17   2   4   24.42    0.48   0
 -16  -2  11    6.97    0.36   0
 -16  -1   8    8.51    0.35   0
 -16   0   6   25.37    0.43   0
 -16   1   4   29.30    0.46   0
 -15  -3  13   12.97    0.37   0
 -15  -1   7    1.03    0.24   0
 -15   1   3    3.73    0.29   0
 -15   5  -1   -0.10    0.25   0
 -14  -4  16   77.94    0.62   0
 -14  -3  11    0.80    0.20   0
 -14  -2   8   97.13    0.54   0
 -14   1   2   35.56    0.35   0
 -14   5  -2   12.93    0.30   0
 -13  -4  14   43.40    0.44   0
 -13  -3  10    6.99    0.26   0
 -13   1   1    1.62    0.16   0
 -13   2   0   26.15    0.31   0
 -13   4  -2   21.27    0.27   0
 -12  -3   9    0.14    0.20   0
 -12   0   2    0.16    0.18   0
 -12   2  -1   16.11    0.23   0
 -12   3  -2    2.05    0.20   0
 -12   6  -4  136.06    0.47   0
 -11  -5  18   45.44    0.37   0
 -11  -5  19   15.24    0.36   0
 -11  -3   8    0.83    0.19   0
 -11  -1   3   13.34    0.20   0
 -11   5  -4   49.43    0.31   0
 -11   7  -5    0.06    0.16   0
 -10  -5  17   10.69    0.25   0
 -10  -4  11    0.05    0.18   0
 -10   1  -1    1.01    0.12   0
 -10   2  -2    3.99    0.15   0
 -10   4  -4    2.14    0.15   0
  -9  -5  16   20.41    0.27   0
  -9  -4  10   35.16    0.24   0
  -9  -2   4  327.44    0.54   0
  -9  -1   2  147.69    0.36   0
  -9   0   0  110.99    0.30   0
  -9   5  -5    4.94    0.14   0
  -8  -5  15   -0.04    0.15   0
  -8   2  -3    3.58    0.12   0
  -8   3  -4   83.18    0.25   0
  -7  -3   6  151.39    0.32   0
  -7   1  -2  246.37    0.38   0
  -6  -2   3    0.72    0.08   0
  -6  -1   1   31.98    0.16   0
  -6   9  -7    1.14    0.09   0
  -5  -2   3  111.31    0.24   0
  -5   0  -1   -0.08    0.06   0
  -4  -5  15   15.24    0.13   0
  -4  -2   3  226.07    0.29   0
  -4   0  -1   -0.02    0.05   0
  -3  -3   6    0.94    0.08   0
  -3  -1   1   62.64    0.14   0
  -2  -5  18   30.68    0.12   0
   0   4  -5   37.28    0.07   0
   2   2  -2  101.99    0.15   0
   2   8  -6    9.04    0.11   0
   2  10  -6    2.52    0.13   0
   4  -2   9    4.07    0.08   0
   4   0   3    0.25    0.07   0
   5  -2  11   29.57    0.16   0
   5  -1   7    2.71    0.09   0
   5   8  -4    4.51    0.14   0
   5  10  -4   11.10    0.22   0
   6  -2  15   21.16    0.17   0
   6  -1   9   98.23    0.26   0
   6   0   6  266.42    0.39   0
   6   7  -3    4.05    0.14   0
   6   8  -3   10.74    0.18   0
   6  10  -3    3.85    0.21   0
   6  11  -3   14.22    0.28   0
   7  -1  12   35.53    0.20   0
   7   0   8  298.65    0.46   0
   7   8  -2   26.21    0.26   0
   7   9  -2    2.92    0.18   0
   7  10  -2    9.45    0.27   0
   8   0  11    0.15    0.16   0
   8   2   5    1.52    0.15   0
   8   4   2   14.63    0.18   0
   8   5   1    6.92    0.15   0
   8   6   0   60.84    0.31   0
   8   9  -1    5.15    0.23   0
   9   0  17    0.11    0.21   0
   9   0  18   13.84    0.27   0
   9   0  19    0.06    0.24   0
   9   1  11    5.71    0.20   0
   9   4   4   57.76    0.28   0
   9   7   1   21.78    0.26   0
   9   8   1    0.80    0.18   0
   9  10   1    8.88    0.30   0
  10   1  16   53.53    0.47   0
  10   1  17    3.43    0.30   0
  10   1  18    1.79    0.29   0
  10   2  11    9.35    0.25   0
  10   3   8    6.15    0.22   0
  10   5   5    6.11    0.19   0
  10   6   4    0.26    0.17   0
  10   7   3   34.04    0.37   0
  11   3  13    0.75    0.25   0
  11   4   9    0.52    0.24   0
  11   5   8    1.76    0.18   0
  11   8   5    0.21    0.31   0
  12   5  12   15.56    0.43   0
  12   6  10   -0.05    0.32   0
 -17   0   8   16.65    0.43   0
 -17   1   6    1.23    0.34   0
 -16  -1   9    0.30    0.29   0
 -16   2   3    3.30    0.26   0
 -16   3   2   96.53    0.64   0
 -16   4   1    0.01    0.30   0
 -15  -3  14   19.84    0.40   0
 -15  -2  10    0.39    0.30   0
 -15   0   5    0.38    0.17   0
 -15   2   2    5.62    0.30   0
 -15   3   1    0.49    0.26   0
 -15   4   0    0.21    0.26   0
 -14  -3  12   17.02    0.35   0
 -14  -2   9   13.15    0.30   0
 -14  -1   6   40.73    0.42   0
 -14   0   4   33.42    0.38   0
 -14   2   1    4.85    0.26   0
 -14   4  -1   20.80    0.32   0
 -13  -4  15    0.43    0.26   0
 -13  -3  11    2.61    0.24   0
 -13   0   3    0.06    0.14   0
 -12   7  -4    0.00    0.19   0
 -11   8  -5   -0.00    0.18   0
 -10  -5  18   42.88    0.37   0
 -10  -3   8    0.61    0.17   0
 -10  -2   5   16.68    0.20   0
 -10   0   1   -0.11    0.15   0
 -10   6  -5    9.41    0.18   0
  -9  -5  17   -0.23    0.19   0
  -9  -4  11   23.68    0.23   0
  -9  -3   7    0.27    0.15   0
  -9   1  -1   81.20    0.28   0
  -9   8  -6   54.25    0.26   0
  -9   9  -6    0.76    0.14   0
  -8  -5  16    7.88    0.21   0
  -8  -4  10   22.61    0.20   0
  -8  -2   4  192.09    0.38   0
  -8   0   0   33.17    0.19   0
  -7  -5  15    7.08    0.15   0
  -7  -4  10    1.61    0.13   0
  -7   2  -3   77.04    0.22   0
  -7   4  -5   43.84    0.18   0
  -6  -5  15    0.38    0.11   0
  -6  -3   6    1.51    0.11   0
  -6   1  -2   99.62    0.23   0
  -5  -5  15    1.31    0.11   0
  -5  -3   6  636.31    0.54   0
  -5  -1   1   89.18    0.21   0
  -5   5  -6   17.65    0.10   0
  -5   8  -7   20.23    0.10   0
  -5  10  -7   31.95    0.12   0
  -4  -3   6  723.26    0.52   0
  -4  -1   1   26.50    0.12   0
  -3  -4  10   16.66    0.10   0
  -2   5  -6   55.66    0.06   0
  -1  -3   7  195.43    0.16   0
  -1  11  -7    0.52    0.09   0
   0   9  -7   10.55    0.10   0
   1  12  -6   15.31    0.20   0
   2   5  -5    5.86    0.08   0
   2   7  -6   62.19    0.18   0
   3   6  -5    2.95    0.08   0
   3  12  -5    0.12    0.17   0
   4  -3  14   62.34    0.18   0
   4   1   1   17.56    0.09   0
   4   4  -3   41.27    0.16   0
   4   8  -5   12.67    0.14   0
   4  10  -5   11.15    0.19   0
   5   1   2   55.51    0.18   0
   5   3  -1   26.24    0.16   0
   5   4  -2  315.06    0.41   0
   5   5  -3    0.77    0.10   0
   5   7  -4   74.05    0.26   0
   5  11  -4   33.15    0.32   0
   6  -2  14   44.90    0.20   0
   6   3   0   79.43    0.24   0
   6   4  -1  112.30    0.27   0
   6   5  -2    0.14    0.12   0
   7   1   5   19.08    0.16   0
   7   2   3   77.57    0.24   0
   7   4   0   64.73    0.25   0
   7   5  -1   55.10    0.26   0
   7   7  -2    9.98    0.19   0
   8  -1  17    1.91    0.18   0
   8  -1  18    0.29    0.18   0
   8  -1  19    3.34    0.21   0
   8  -1  20    7.93    0.24   0
   8   1   7    6.43    0.17   0
   8   3   3    6.48    0.13   0
   8   7  -1   77.32    0.35   0
   8   8  -1   21.30    0.23   0
   9   0  15    0.27    0.19   0
   9   0  16   22.02    0.28   0
   9   1  10   45.88    0.28   0
   9   2   7    9.70    0.19   0
   9   3   5  106.83    0.36   0
   9   4   3   19.11    0.21   0
   9   5   2   34.81    0.26   0
   9   6   1    4.32    0.19   0
   9   9   0    0.43    0.25   0
   9  10   0   12.95    0.30   0
  10   1  14   13.59    0.27   0
  10   1  15   17.87    0.32   0
  10   2  10   23.20    0.28   0
  10   3   7   12.89    0.24   0
  10   5   4    4.55    0.21   0
  10   8   2    0.31    0.25   0
  10   9   2   19.34    0.40   0
  11   2  15   10.11    0.29   0
  11   2  16   52.47    0.50   0
  11   3  11    3.68    0.27   0
  11   4   8  176.76    0.56   0
  11   5   7    0.14    0.17   0
  11   7   5   -0.11    0.20   0
  11   8   4   26.65    0.38   0
  11   9   4    0.32    0.33   0
  12   5  11    8.00    0.29   0
  12   6   9    6.13    0.32   0
  12   7   8    5.30    0.34   0
 -16  -2  13   22.10    0.42   0
 -16   0   7   -0.01    0.28   0
 -16   1   5    1.12    0.23   0
 -15  -3  15    2.68    0.33   0
 -15  -2  11   11.75    0.37   0
 -15   0   6    0.06    0.23   0
 -15   1   4   23.00    0.34   0
 -14  -3  13   -0.01    0.27   0
 -14   1   3    2.48    0.25   0
 -14   6  -2    4.95    0.28   0
 -13  -4  16   12.85    0.34   0
 -13  -4  17   21.09    0.38   0
 -13  -2   8    0.37    0.22   0
 -13   1   2   15.53    0.25   0
 -13   7  -3    0.05    0.22   0
 -12  -4  15   30.05    0.37   0
 -12  -3  10    4.48    0.21   0
 -12  -2   7   36.93    0.31   0
 -12   5  -3   -0.18    0.18   0
 -12   8  -4    0.00    0.20   0
 -11  -4  13   35.74    0.31   0
 -11  -3   9    3.76    0.19   0
 -11  -2   6   32.46    0.24   0
 -11   0   2   37.92    0.25   0
 -11   2  -1   12.00    0.21   0
 -11   3  -2   83.74    0.33   0
 -11   4  -3   23.62    0.24   0
 -10  -5  19    8.35    0.23   0
 -10  -5  20    4.20    0.24   0
 -10  -4  12   48.76    0.31   0
 -10   7  -5    2.87    0.17   0
  -9  -5  18   44.22    0.38   0
  -9   4  -4   63.61    0.25   0
  -8  -5  17    7.34    0.20   0
  -8  -3   7   12.76    0.16   0
  -8  -1   2    0.43    0.12   0
  -8   7  -6   16.83    0.16   0
  -7  -5  16   38.95    0.22   0
  -7   3  -4   92.08    0.23   0
  -7   6  -6  108.47    0.25   0
  -6  -5  16  213.20    0.43   0
  -6  -4  10    0.77    0.10   0
  -6   4  -5  117.03    0.24   0
  -5  -5  16    7.63    0.14   0
  -4  -5  16    6.18    0.11   0
  -4  -4  10    7.00    0.10   0
  -4   5  -6    0.45    0.05   0
  -3  -5  17    1.52    0.09   0
  -2  -5  19    1.04    0.07   0
  -1  -2   4   62.29    0.08   0
   0   8  -7   11.44    0.09   0
   0  10  -7    8.63    0.11   0
   3  -3  11    3.78    0.07   0
   3  -2   7  216.69    0.23   0
   3  -1   4  498.88    0.34   0
   3   1   0  144.85    0.19   0
   3   9  -6    2.47    0.13   0
   4   3  -2   60.92    0.16   0
   4   5  -4  222.14    0.34   0
   4   7  -5    6.57    0.12   0
   4  11  -5    7.93    0.22   0
   5  -3  18   10.28    0.15   0
   5  -3  19    5.09    0.14   0
   5  -3  20   18.73    0.19   0
   5  -3  21    0.65    0.14   0
   5  -3  22   -0.12    0.14   0
   6  -2  13   53.38    0.21   0
   6   1   3   93.43    0.25   0
   7   0   7    0.30    0.12   0
   7   3   1    7.40    0.14   0
   7   6  -2   53.93    0.26   0
   7   9  -3    7.38    0.20   0
   8  -1  15   -0.11    0.16   0
   8   2   4    0.73    0.14   0
   8   4   1   58.78    0.26   0
   8   5   0   64.56    0.29   0
   9   0  13    0.39    0.18   0
   9   0  14    0.21    0.17   0
   9   1   9   21.00    0.23   0
   9   2   6  143.17    0.40   0
   9   3   4   68.75    0.31   0
   9   7   0  112.62    0.42   0
   9   8   0    0.57    0.17   0
  10   1  13    3.91    0.23   0
  10   2   9    2.28    0.20   0
  10   4   5   67.43    0.32   0
  10   7   2    2.45    0.23   0
  10   9   1    2.68    0.26   0
  11   2  13    4.22    0.26   0
  11   2  14   11.57    0.31   0
  11   3  10  212.94    0.70   0
  11   4   7   15.52    0.27   0
  11   5   6    2.51    0.23   0
  11   6   5    2.33    0.19   0
  11   7   4   11.80    0.33   0
  11   9   3   -0.19    0.30   0
  12   4  11    1.49    0.32   0
  12   4  12    3.79    0.32   0
  12   5   9    5.66    0.32   0
  12   6   8    9.10    0.29   0
  12   7   7   -0.03    0.24   0
 -17   0   9    0.11    0.24   0
 -17   1   7   -0.04    0.25   0
 -16  -1  10   30.17    0.45   0
 -16   0   8    4.48    0.28   0
 -16   1   6    2.32    0.28   0
 -16   2   4   27.63    0.41   0
 -16   3   3    2.48    0.32   0
 -16   4   2    1.68    0.31   0
 -15  -2  12    0.27    0.28   0
 -15   2   3    3.12    0.28   0
 -15   5   0    0.01    0.28   0
 -14  -3  14   61.35    0.52   0
 -14  -1   7    2.92    0.18   0
 -14   0   5    0.05    0.21   0
 -14   2   2    0.15    0.24   0
 -14   5  -1   -0.08    0.25   0
 -13  -4  18    0.07    0.28   0
 -13  -3  12  105.45    0.58   0
 -13  -2   9    0.91    0.22   0
 -13   0   4    3.91    0.21   0
 -13   2   1   12.41    0.23   0
 -13   4  -1    7.91    0.23   0
 -13   5  -2    3.24    0.21   0
 -12  -4  16    3.82    0.25   0
 -12  -3  11   -0.05    0.21   0
 -12   0   3   -0.23    0.16   0
 -12   2   0   55.86    0.34   0
 -12   3  -1    1.86    0.19   0
 -12   4  -2   80.96    0.39   0
 -11  -4  14   29.03    0.29   0
 -11   6  -4    6.42    0.20   0
 -10  -4  13   15.39    0.25   0
 -10  -3   9   21.62    0.24   0
 -10   1   0   33.59    0.24   0
 -10   5  -4    4.41    0.15   0
  -9  -5  19   51.76    0.30   0
  -9  -4  12   30.02    0.23   0
  -9  -3   8  182.19    0.43   0
  -9  -2   5    6.53    0.12   0
  -9  -1   3    2.15    0.14   0
  -9   0   1    0.63    0.14   0
  -9   3  -3   38.78    0.21   0
  -9   6  -5    6.88    0.15   0
  -8  -5  18   33.94    0.31   0
  -8  -4  11    5.15    0.15   0
  -8   1  -1   13.70    0.14   0
  -8   5  -5   15.27    0.14   0
  -8   8  -6   40.78    0.21   0
  -7  -5  17    6.52    0.19   0
  -7  -3   7    5.19    0.12   0
  -7  -2   4   10.75    0.11   0
  -7  -1   2    0.27    0.11   0
  -7   0   0  142.66    0.29   0
  -6   2  -3  292.64    0.36   0
  -6   3  -4    0.18    0.08   0
  -5  -4  10   56.24    0.18   0
  -5   1  -2   54.80    0.16   0
  -4  -5  17    0.29    0.10   0
  -3   5  -6  115.85    0.13   0
  -2  -5  20    0.47    0.08   0
  -1   7  -7    0.23    0.03   0
   2   0   1    0.04    0.03   0
   2  12  -6    0.96    0.17   0
   3   8  -6   10.92    0.14   0
   3  10  -6    0.66    0.13   0
   4  -3  13   -0.05    0.08   0
   4  -1   5  154.85    0.23   0
   4   2  -1  186.40    0.27   0
   5  -3  17   24.03    0.17   0
   5  -2  10   44.34    0.16   0
   5   6  -4  133.96    0.31   0
   5   9  -5   28.93    0.27   0
   6  -1   8    0.48    0.10   0
   6   0   5    0.51    0.11   0
   6   8  -4    1.07    0.14   0
   6   9  -4    7.42    0.20   0
   6  11  -4    3.31    0.24   0
   7  -2  17    1.39    0.17   0
   7  -2  18   25.14    0.24   0
   7  -2  19    3.15    0.19   0
   7  -2  20   44.05    0.35   0
   7  -2  21    6.25    0.24   0
   7  -1  10    6.03    0.13   0
   7   1   4   22.87    0.16   0
   7   8  -3    2.78    0.19   0
   7  10  -3   39.51    0.38   0
   7  11  -3   51.98    0.38   0
   8  -1  14   22.63    0.21   0
   8   0   9    0.14    0.14   0
   8   1   6   46.30    0.23   0
   8   3   2   92.26    0.30   0
   8   6  -1   23.30    0.23   0
   8   8  -2   40.05    0.30   0
   8   9  -2    4.21    0.23   0
   8  10  -2    2.72    0.25   0
   8  11  -2   -0.03    0.26   0
   9   0  12    0.40    0.18   0
   9   1   8   49.16    0.27   0
   9   4   2   20.41    0.21   0
   9   5   1    7.17    0.20   0
   9   9  -1   14.23    0.29   0
   9  10  -1    0.94    0.29   0
  10   1  12   11.96    0.24   0
  10   2   8    6.46    0.21   0
  10   3   6   29.29    0.26   0
  10   4   4    1.90    0.18   0
  10   5   3    0.09    0.18   0
  10   6   2   10.15    0.26   0
  10   7   1    1.08    0.21   0
  10   8   1   11.59    0.28   0
  10  10   1    4.31    0.29   0
  11   2  12   27.62    0.34   0
  11   3   9   10.74    0.23   0
  11   5   5    0.28    0.23   0
  11   6   4    8.62    0.28   0
  11   7   3    0.56    0.27   0
  11   8   3    2.37    0.24   0
  12   3  13    6.85    0.32   0
  12   3  14    2.20    0.32   0
  12   4  10    2.59    0.31   0
  12   5   8   22.55    0.38   0
  12   6   7    0.13    0.20   0
  12   7   6    3.07    0.24   0
  12   8   5    0.09    0.34   0
 -17   2   6   45.24    0.52   0
 -16  -1  11   13.34    0.38   0
 -16   2   5    0.47    0.29   0
 -15  -1   9   10.78    0.26   0
 -15   0   7   -0.42    0.25   0
 -15   1   5   20.34    0.35   0
 -15   3   2    3.10    0.22   0
 -15   4   1    0.66    0.19   0
 -14  -3  15    1.50    0.27   0
 -14  -2  11    4.08    0.29   0
 -14   1   4    3.37    0.23   0
 -14   3   1    0.58    0.22   0
 -14   4   0   26.96    0.35   0
 -13  -3  13    0.77    0.25   0
 -13   3   0    7.13    0.18   0
 -13   6  -2   78.80    0.48   0
 -12  -4  17    5.95    0.28   0
 -12  -2   8    1.52    0.19   0
 -12   1   2   17.80    0.23   0
 -12   6  -3    0.27    0.19   0
 -11  -4  15    0.34    0.20   0
 -11  -3  10    3.43    0.15   0
 -11  -2   7   59.83    0.32   0
 -11   1   1   68.71    0.32   0
 -11   5  -3    1.49    0.15   0
 -11   7  -4   12.81    0.22   0
 -10   0   2    0.74    0.16   0
 -10   2  -1   50.00    0.25   0
 -10   4  -3    6.96    0.16   0
 -10   8  -5    0.54    0.15   0
 -10   9  -5    5.73    0.19   0
  -9  -5  20    6.05    0.22   0
  -9  -5  21    2.89    0.21   0
  -8  -5  19    0.03    0.17   0
  -8  -4  12   16.88    0.20   0
  -8  -3   8   21.96    0.17   0
  -8  -2   5   94.69    0.28   0
  -8   4  -4    9.91    0.13   0
  -8   9  -6    6.49    0.14   0
  -8  10  -6    5.13    0.14   0
  -7  -5  18  121.53    0.38   0
  -6  -2   4  188.73    0.31   0
  -6   0   0  105.71    0.24   0
  -5  -5  17    1.98    0.12   0
  -5   4  -5    6.98    0.09   0
  -4   1  -2  515.23    0.38   0
  -4   8  -7    5.97    0.06   0
  -3   1  -2   35.08    0.10   0
  -2  -5  21    4.67    0.10   0
  -2  -5  22    1.35    0.08   0
  -2  -5  23    1.97    0.08   0
  -2  -4  11   31.49    0.10   0
  -2   1  -2  103.08    0.12   0
   0  11  -7    4.62    0.12   0
   1  10  -7    3.92    0.11   0
   2  -1   3   66.76    0.10   0
   3  -4  20   48.39    0.20   0
   3  -4  21    7.34    0.11   0
   3   3  -3   14.41    0.09   0
   3   4  -4   44.01    0.14   0
   4  -2   8  146.37    0.22   0
   5  -3  16  110.65    0.29   0
   5   8  -5    4.70    0.13   0
   5  10  -5    5.73    0.19   0
   5  11  -5   21.50    0.29   0
   6  -2  12  175.69    0.33   0
   6   4  -2   69.27    0.23   0
   6   7  -4   -0.01    0.14   0
   7  -2  16   14.16    0.18   0
   7   4  -1    8.10    0.15   0
   7   7  -3    7.40    0.18   0
   8  -1  13    1.55    0.15   0
   8   7  -2    0.48    0.18   0
   9   0  11    0.26    0.17   0
   9   2   5   14.46    0.19   0
   9   3   3   43.27    0.25   0
   9   6   0   14.06    0.19   0
   9   8  -1   52.08    0.40   0
  10   0  17   -0.21    0.24   0
  10   0  18   91.83    0.54   0
  10   1  11   -0.30    0.14   0
  10   2   7    2.48    0.18   0
  10   3   5    1.18    0.18   0
  10   9   0    4.34    0.28   0
  10  10   0    0.43    0.26   0
  11   1  16   12.49    0.34   0
  11   1  17    5.63    0.32   0
  11   2  11    2.66    0.23   0
  11   3   8   20.22    0.29   0
  11   4   6   57.78    0.36   0
  11   5   4   61.11    0.37   0
  11   6   3    6.34    0.26   0
  11   8   2   36.15    0.39   0
  11   9   2   13.68    0.39   0
  12   3  11   -0.41    0.25   0
  12   3  12   -0.21    0.29   0
  12   4   9   23.77    0.39   0
  12   5   7    5.54    0.30   0
  12   6   6    6.38    0.25   0
  12   7   5    0.03    0.26   0
  12   8   4    0.23    0.32   0
 -16  -1  12    1.02    0.32   0
 -16   0   9    0.10    0.30   0
 -16   1   7    2.54    0.30   0
 -16   3   4    1.74    0.32   0
 -16   4   3    0.66    0.30   0
 -15  -2  13    1.99    0.25   0
 -15  -1  10    5.20    0.30   0
 -15   5   1    3.77    0.27   0
 -15   6   0    6.66    0.30   0
 -14  -3  16    0.68    0.28   0
 -14   0   6    1.46    0.18   0
 -14   2   3    8.32    0.26   0
 -14   6  -1   19.59    0.37   0
 -13  -3  14   32.09    0.38   0
 -13  -2  10    5.65    0.25   0
 -13   0   5    0.34    0.21   0
 -13   1   3    3.99    0.17   0
 -12  -4  18   12.68    0.33   0
 -12  -3  12   50.58    0.37   0
 -12  -1   6    4.63    0.20   0
 -12   0   4   52.15    0.30   0
 -12   5  -2    9.22    0.20   0
 -12   7  -3    0.04    0.19   0
 -11  -4  16   15.64    0.29   0
 -11  -3  11    3.23    0.19   0
 -11  -1   5    0.76    0.16   0
 -11   0   3    0.07    0.16   0
 -11   4  -2    2.87    0.18   0
 -11   8  -4   16.38    0.29   0
 -10  -4  14   24.17    0.25   0
 -10  -3  10  176.94    0.63   0
 -10   6  -4    0.21    0.17   0
  -9  -4  13    5.40    0.17   0
  -9  -3   9    0.35    0.16   0
  -9  -2   6   18.51    0.19   0
  -9   1   0  314.64    0.49   0
  -9   5  -4   15.20    0.17   0
  -9   7  -5    0.54    0.15   0
  -8  -5  20   10.52    0.21   0
  -8  -5  21   23.91    0.31   0
  -8  -5  22    0.90    0.21   0
  -8  -1   3   15.68    0.15   0
  -8   0   1    0.19    0.12   0
  -8   2  -2    8.37    0.11   0
  -8   3  -3    5.92    0.12   0
  -7  -5  19   13.13    0.20   0
  -7   1  -1  157.12    0.30   0
  -7   5  -5   78.69    0.22   0
  -7   7  -6   61.18    0.20   0
  -6  -5  18   27.86    0.19   0
  -6  -4  11    2.18    0.10   0
  -5  -5  18   41.02    0.21   0
  -5  -3   7    0.08    0.09   0
  -5  -2   4  609.11    0.51   0
  -5   2  -3    3.38    0.08   0
  -5   3  -4   15.99    0.10   0
  -4  -5  18  164.24    0.32   0
  -4  10  -7    2.08    0.06   0
  -3  -5  19    4.69    0.10   0
  -2  -3   7    9.63    0.07   0
   1   8  -7   25.42    0.12   0
   2  -4  15   15.23    0.07   0
   2   6  -6   44.80    0.14   0
   3  -4  19   11.96    0.11   0
   3   5  -5  184.85    0.28   0
   3   7  -6   14.74    0.13   0
   4   6  -5   37.90    0.17   0
   4   9  -6   74.23    0.31   0
   4  10  -6    0.31    0.15   0
   5  -3  15    3.98    0.12   0
   5   4  -3  212.20    0.34   0
   5   7  -5   11.51    0.16   0
   6  -1   7  166.88    0.29   0
   6   3  -1   55.56    0.20   0
   6   5  -3   58.35    0.22   0
   7  -2  15    1.51    0.13   0
   7  -1   9    1.03    0.11   0
   7   0   6  766.96    0.68   0
   7   3   0  296.12    0.46   0
   7   5  -2    0.18    0.09   0
   7   6  -3    1.53    0.14   0
   7   9  -4   14.93    0.25   0
   8  -1  12   94.86    0.32   0
   8   1   5    6.28    0.15   0
   8   2   3    3.22    0.11   0
   8   4   0    3.16    0.16   0
   8   5  -1    6.94    0.19   0
   8   6  -2  114.93    0.38   0
   8   9  -3   32.64    0.28   0
   8  10  -3    3.37    0.26   0
   9  -1  17    8.96    0.23   0
   9  -1  18    5.55    0.22   0
   9  -1  19    2.57    0.22   0
   9   0  10   49.26    0.27   0
   9   1   7    0.54    0.17   0
   9   7  -1    0.46    0.14   0
  10   0  15    0.37    0.23   0
  10   0  16    6.45    0.24   0
  10   1  10  101.81    0.40   0
  10   4   3    7.05    0.20   0
  10   5   2   15.25    0.19   0
  10   6   1   32.62    0.30   0
  10   7   0    0.24    0.21   0
  10   8   0    0.57    0.22   0
  11   1  14   21.21    0.31   0
  11   1  15    2.86    0.25   0
  11   2  10   14.36    0.23   0
  11   4   5    2.91    0.23   0
  11   7   2   21.12    0.35   0
  11   9   1   23.01    0.39   0
  12   2  14    9.31    0.30   0
  12   2  15   -0.07    0.29   0
  12   3  10  119.00    0.51   0
  12   4   8   60.09    0.46   0
  12   5   6   14.92    0.29   0
  12   7   4    0.11    0.29   0
  13   5   9    9.63    0.36   0
  13   5  10    5.32    0.27   0
  13   6   8    2.37    0.30   0
 -17   1   9   -0.16    0.25   0
 -16  -1  13    3.82    0.36   0
 -16   0  10    6.11    0.33   0
 -16   2   6    1.41    0.30   0
 -15  -2  14    1.29    0.29   0
 -15  -1  11    0.39    0.29   0
 -15   0   8   22.88    0.37   0
 -15   3   3    5.86    0.28   0
 -15   4   2   14.11    0.34   0
 -14  -3  17    0.97    0.30   0
 -14  -2  12    0.43    0.20   0
 -14  -1   9    0.05    0.23   0
 -14   0   7   -0.04    0.22   0
 -14   1   5    0.38    0.23   0
 -14   3   2    4.51    0.25   0
 -14   4   1    1.99    0.24   0
 -14   5   0   18.09    0.33   0
 -14   7  -1    2.35    0.24   0
 -13  -3  15   -0.25    0.25   0
 -13  -2  11    1.02    0.22   0
 -13   2   2    6.78    0.18   0
 -13   3   1    7.25    0.23   0
 -13   5  -1    3.97    0.21   0
 -13   7  -2    0.09    0.21   0
 -12  -4  19   13.77    0.32   0
 -12  -3  13    4.09    0.24   0
 -12  -2   9    8.91    0.19   0
 -12   2   1    2.12    0.14   0
 -12   3   0  133.85    0.42   0
 -12   4  -1    3.67    0.20   0
 -12   8  -3    0.92    0.22   0
 -11  -4  17   24.91    0.28   0
 -11  -2   8   14.08    0.22   0
 -11   3  -1  103.62    0.36   0
 -11   9  -4    0.18    0.18   0
 -10  -4  15   34.80    0.29   0
 -10  -2   7   47.34    0.26   0
 -10   1   1   80.59    0.29   0
  -9  -4  14  155.23    0.40   0
  -9  -1   4   16.62    0.17   0
  -9   0   2  558.69    0.65   0
  -9   2  -1    3.18    0.13   0
  -8  -4  13    0.74    0.14   0
  -8   6  -5    6.64    0.12   0
  -7  -5  20   51.12    0.27   0
  -7  -5  21    5.32    0.21   0
  -7  -5  22   16.62    0.23   0
  -7  -4  12    3.20    0.12   0
  -7  -3   8   23.10    0.16   0
  -7  -2   5    5.36    0.12   0
  -7   8  -6   30.07    0.17   0
  -6  -5  19    8.38    0.15   0
  -6  -5  20   72.50    0.30   0
  -5  -5  19    8.03    0.14   0
  -5  -1   2   94.33    0.21   0
  -5   0   0    4.58    0.07   0
  -4  -5  19    9.64    0.13   0
  -4  -4  11    2.06    0.08   0
  -4  -3   7   20.61    0.12   0
  -4  -2   4  437.38    0.37   0
  -4   2  -3  410.15    0.33   0
  -4   4  -5    3.26    0.07   0
  -4   9  -7    0.23    0.05   0
  -3  -5  20   12.09    0.13   0
  -3  -4  11   58.70    0.15   0
  -3  -3   7   50.74    0.14   0
  -3  -2   4  115.77    0.18   0
  -2  -2   4  146.53    0.16   0
  -1  12  -7    3.62    0.10   0
   1   3  -4   16.91    0.06   0
   1  11  -7    3.66    0.12   0
   2   1  -1  101.31    0.13   0
   2   9  -7   65.64    0.22   0
   3  -4  18   41.37    0.15   0
   3   2  -2  579.48    0.39   0
   4  -3  12  207.32    0.27   0
   4   0   2  296.47    0.31   0
   4   8  -6    0.24    0.11   0
   4  11  -6    0.69    0.18   0
   5  -2   9    6.74    0.09   0
   5   0   3    0.20    0.06   0
   5   3  -2   39.27    0.17   0
   5   5  -4  124.88    0.27   0
   6  -2  11   55.82    0.20   0
   6   0   4  223.66    0.34   0
   6   9  -5   30.65    0.24   0
   6  10  -5   63.53    0.35   0
   7  -2  14   57.16    0.25   0
   7   1   3   38.87    0.19   0
   7   8  -4   15.53    0.21   0
   7  10  -4   15.90    0.28   0
   7  11  -4    0.86    0.22   0
   8  -1  11    8.64    0.16   0
   8   8  -3   61.66    0.38   0
   9  -1  15    0.43    0.18   0
   9  -1  16   11.74    0.23   0
   9   2   4   86.01    0.31   0
   9   4   1   24.50    0.19   0
   9   5   0   48.04    0.27   0
   9   6  -1   94.93    0.38   0
   9   8  -2    0.59    0.22   0
   9   9  -2   13.93    0.29   0
   9  10  -2   14.20    0.34   0
  10   0  13   -0.24    0.18   0
  10   0  14   50.35    0.34   0
  10   1   9    7.55    0.19   0
  10   2   6   18.17    0.24   0
  10   3   4   92.60    0.37   0
  10   5   1   66.47    0.33   0
  10   9  -1   22.64    0.31   0
  10  10  -1    8.35    0.33   0
  11   1  12   30.54    0.34   0
  11   1  13    2.43    0.24   0
  11   2   9   10.52    0.21   0
  11   3   6    1.39    0.22   0
  11   5   3    1.62    0.22   0
  11   6   2    0.05    0.23   0
  11   8   1    0.01    0.27   0
  12   2  12    7.70    0.28   0
  12   2  13    2.63    0.27   0
  12   3   9    1.39    0.27   0
  12   4   7    6.74    0.29   0
  12   5   5    3.59    0.26   0
  12   6   4  134.32    0.61   0
  12   7   3    0.45    0.30   0
  12   8   3    0.90    0.29   0
  13   4  10    8.29    0.35   0
  13   4  11   21.39    0.41   0
  13   5   8   10.05    0.34   0
  13   6   7    0.86    0.28   0
 -17   2   8    0.13    0.33   0
 -16   1   8    7.52    0.29   0
 -16   3   5    4.35    0.35   0
 -16   4   4   46.35    0.53   0
 -15  -2  15    1.68    0.29   0
 -15   0   9   -0.27    0.26   0
 -15   2   5    4.63    0.28   0
 -14  -2  13    0.00    0.27   0
 -14   6   0   16.31    0.32   0
 -13  -3  16   17.03    0.34   0
 -13   0   6   43.49    0.32   0
 -13   1   4  109.06    0.47   0
 -12  -3  14    0.27    0.22   0
 -12  -2  10    1.51    0.21   0
 -12  -1   7   24.90    0.26   0
 -12   0   5    0.23    0.18   0
 -12   1   3    4.36    0.20   0
 -12   6  -2    0.40    0.19   0
 -11  -4  18   82.38    0.46   0
 -11  -4  19    1.38    0.25   0
 -11  -3  12   53.30    0.32   0
 -11  -1   6   29.93    0.24   0
 -11   0   4   45.16    0.26   0
 -11   1   2    0.75    0.16   0
 -11   6  -3    6.60    0.20   0
 -10  -4  16  101.28    0.40   0
 -10  -3  11    3.60    0.18   0
 -10  -1   5   38.82    0.24   0
 -10   0   3    0.17    0.15   0
 -10   5  -3    0.02    0.13   0
  -9  -4  15   -0.13    0.17   0
  -9  -3  10   24.54    0.21   0
  -9   3  -2   37.57    0.21   0
  -9   4  -3   17.57    0.17   0
  -9   8  -5   26.62    0.20   0
  -9   9  -5    8.21    0.18   0
  -9  10  -5    4.00    0.17   0
  -8  -3   9   11.14    0.16   0
  -8  -2   6   17.66    0.16   0
  -8   1   0  266.84    0.41   0
  -7  -1   3   27.88    0.16   0
  -7   0   1    0.24    0.11   0
  -7   2  -2    0.42    0.10   0
  -7   3  -3    0.10    0.09   0
  -7   4  -4    0.09    0.09   0
  -7  10  -6   15.95    0.16   0
  -6  -5  21   16.05    0.22   0
  -6  -5  22    4.37    0.16   0
  -6  -5  23    6.95    0.19   0
  -6  -4  12   64.28    0.21   0
  -6  -3   8   40.50    0.17   0
  -6   1  -1    5.13    0.11   0
  -5  -5  20   60.42    0.25   0
  -5   6  -6    0.25    0.06   0
  -4  -5  20   34.12    0.19   0
  -4   3  -4  345.04    0.30   0
  -3  -5  21    0.70    0.10   0
  -3  -5  22    0.65    0.10   0
  -3  -5  23   16.28    0.16   0
  -1  -4  12   48.28    0.09   0
   0   7  -7    2.06    0.05   0
   1   4  -5   25.62    0.08   0
   2  -3   9   12.49    0.05   0
   2  10  -7   34.36    0.18   0
   3  -3  10    0.67    0.06   0
   4   1   0  122.02    0.20   0
   5  -3  14    1.47    0.10   0
   5   2  -1    3.17    0.10   0
   6  -3  18    0.90    0.12   0
   6  -3  19    0.68    0.15   0
   6  -3  20    0.05    0.15   0
   6  -3  21    0.36    0.15   0
   6   8  -5    4.43    0.15   0
   6  11  -5    0.71    0.19   0
   7  -2  13    0.08    0.11   0
   7  -1   8   47.65    0.20   0
   7   0   5    0.27    0.12   0
   7   2   1   38.80    0.17   0
   8  -2  18   20.07    0.26   0
   8  -2  19    1.21    0.21   0
   8  -2  20    2.02    0.21   0
   8   1   4  113.95    0.31   0
   8   2   2    9.75    0.15   0
   8   7  -3    2.59    0.18   0
   9  -1  14    2.42    0.17   0
   9   0   9    0.06    0.16   0
   9   1   6   80.13    0.29   0
   9   7  -2   28.42    0.28   0
  10   0  12   75.25    0.35   0
  10   1   8    2.37    0.19   0
  10   4   2    2.48    0.19   0
  10   6   0   14.22    0.23   0
  10   8  -1   -0.02    0.22   0
  11   1  11    0.61    0.22   0
  11   2   8  245.28    0.64   0
  11   4   4   45.63    0.30   0
  11   7   1   41.41    0.37   0
  11   9   0    9.01    0.33   0
  12   2  11   18.39    0.34   0
  12   3   8  156.32    0.59   0
  12   4   6   53.57    0.42   0
  12   8   2   11.15    0.37   0
  13   3  12    1.38    0.32   0
  13   4   9    0.73    0.29   0
  13   5   7    1.54    0.28   0
  13   6   6    1.03    0.28   0
  13   7   5    0.63    0.32   0
 -16   0  11    0.03    0.20   0
 -16   1   9    0.16    0.30   0
 -16   2   7    0.57    0.29   0
 -15  -1  12    7.38    0.26   0
 -15   1   7    1.02    0.18   0
 -15   3   4    0.54    0.27   0
 -15   4   3    1.58    0.26   0
 -15   5   2   28.65    0.39   0
 -14  -2  14    9.43    0.32   0
 -14   0   8  106.00    0.61   0
 -14   1   6   43.79    0.41   0
 -14   3   3   -0.08    0.22   0
 -14   5   1   -0.03    0.25   0
 -13  -3  17    8.29    0.30   0
 -13  -2  12    1.45    0.24   0
 -13  -1   9   29.56    0.29   0
 -13   2   3   -0.01    0.21   0
 -13   6  -1    3.26    0.22   0
 -12  -3  15    0.82    0.23   0
 -12   2   2  125.07    0.40   0
 -12   5  -1    0.26    0.16   0
 -11  -4  20    0.03    0.23   0
 -11  -2   9   35.03    0.26   0
 -11   2   1   69.98    0.31   0
 -11   5  -2    1.10    0.16   0
 -11   7  -3    1.01    0.20   0
 -10  -4  17    0.12    0.20   0
 -10  -2   8    2.94    0.17   0
 -10   2   0    0.84    0.11   0
 -10   4  -2    2.54    0.15   0
 -10   8  -4   34.40    0.28   0
  -9  -2   7   10.32    0.16   0
  -9   6  -4   39.53    0.23   0
  -8  -4  14   24.40    0.20   0
  -8   5  -4  162.60    0.34   0
  -8   7  -5    4.29    0.15   0
  -7  -4  13    7.47    0.14   0
  -6  -2   5  130.87    0.26   0
  -6   5  -5   71.70    0.18   0
  -6   7  -6   57.84    0.18   0
  -5  -5  21    8.01    0.14   0
  -5  -5  22    0.70    0.13   0
  -5  -5  23   28.72    0.22   0
  -4  -5  21    9.96    0.14   0
  -4  -5  22    0.14    0.12   0
  -4  -5  23   10.42    0.14   0
  -4  -1   2   11.06    0.07   0
  -3   2  -3    5.51    0.05   0
  -3   4  -5    2.81    0.05   0
  -3   8  -7   11.01    0.05   0
   0   5  -6  153.31    0.13   0
   1  12  -7    2.92    0.14   0
   2   8  -7   19.32    0.13   0
   2  11  -7   88.90    0.29   0
   3  -4  17   10.67    0.09   0
   3   6  -6   15.98    0.12   0
   4  -2   7    1.79    0.07   0
   4  -1   4  130.17    0.20   0
   4   3  -3    3.70    0.09   0
   4   4  -4  343.58    0.38   0
   4   7  -6  118.74    0.27   0
   5  -1   5   83.30    0.20   0
   5   6  -5   27.42    0.17   0
   5   9  -6   56.76    0.29   0
   5  10  -6    0.40    0.15   0
   5  11  -6    1.90    0.21   0
   6  -3  17    4.40    0.14   0
   6  -2  10   30.88    0.15   0
   6  -1   6   38.36    0.16   0
   6   7  -5    0.59    0.13   0
   7  -2  12   60.27    0.23   0
   7   3  -1   65.59    0.23   0
   7   4  -2  260.10    0.44   0
   7   5  -3    3.78    0.14   0
   8  -2  17    0.79    0.16   0
   8  -1  10   38.06    0.22   0
   8   0   6  379.10    0.52   0
   8   3   0  322.06    0.50   0
   8   4  -1   53.41    0.25   0
   8   5  -2   97.45    0.33   0
   8   6  -3  119.91    0.38   0
   8   9  -4   32.40    0.34   0
   8  10  -4   25.55    0.33   0
   9   0   8    0.80    0.16   0
   9   2   3    1.08    0.15   0
   9   4   0   15.79    0.19   0
   9   5  -1   86.38    0.34   0
   9   6  -2   52.51    0.30   0
   9   9  -3   27.36    0.32   0
   9  10  -3   11.55    0.33   0
  10   0  11    0.01    0.18   0
  10   1   7   13.47    0.20   0
  10   2   5    4.82    0.15   0
  10   3   3    1.07    0.16   0
  10   7  -1   17.06    0.23   0
  10   9  -2    7.86    0.26   0
  10  10  -2    7.49    0.30   0
  11   0  16  109.92    0.58   0
  11   0  17   -0.65    0.25   0
  11   1  10   66.33    0.36   0
  11   2   7    0.74    0.21   0
  11   3   5    0.09    0.13   0
  11   4   3   29.19    0.27   0
  11   5   2    1.66    0.20   0
  11   6   1    5.13    0.24   0
  11   7   0    0.29    0.23   0
  11   8   0    4.74    0.22   0
  12   1  15    7.74    0.32   0
  12   2  10   31.64    0.34   0
  12   3   7    5.29    0.25   0
  12   4   5    0.01    0.22   0
  12   5   4    3.45    0.18   0
  12   7   2   29.36    0.43   0
  13   3  11    0.04    0.29   0
  13   4   8    0.14    0.29   0
  13   6   5    0.31    0.29   0
  13   7   4    1.72    0.34   0
 -16   0  12    3.76    0.30   0
 -16   1  10   31.29    0.44   0
 -16   3   6   12.07    0.36   0
 -16   4   5    5.02    0.34   0
 -15  -1  13   12.95    0.35   0
 -15   0  10    9.31    0.29   0
 -15   1   8    1.50    0.26   0
 -15   2   6    0.04    0.27   0
 -14  -2  15    7.26    0.31   0
 -14  -1  11    5.00    0.27   0
 -14   4   2    4.13    0.24   0
 -14   7   0    5.24    0.28   0
 -13  -3  18   16.66    0.36   0
 -13  -3  19    0.01    0.27   0
 -13   0   7    0.32    0.21   0
 -13   3   2   88.32    0.44   0
 -13   4   1    6.13    0.23   0
 -13   5   0   76.92    0.43   0
 -13   7  -1   11.57    0.26   0
 -12  -3  16    5.02    0.25   0
 -12  -2  11    0.52    0.18   0
 -12  -1   8   95.62    0.42   0
 -12   1   4    6.19    0.18   0
 -12   4   0   14.27    0.22   0
 -12   7  -2   37.26    0.29   0
 -11  -3  14   14.03    0.26   0
 -11  -2  10  112.55    0.39   0
 -11  -1   7    9.47    0.19   0
 -11   3   0   93.00    0.36   0
 -11   4  -1    6.40    0.19   0
 -10  -4  18   46.37    0.36   0
 -10  -4  19   11.33    0.26   0
 -10  -3  12   48.49    0.29   0
 -10   1   2  206.88    0.42   0
 -10   9  -4   11.15    0.23   0
  -9  -4  16   85.83    0.38   0
  -9  -1   5   28.68    0.19   0
  -9   1   1  121.53    0.30   0
  -8  -3  10    0.45    0.13   0
  -8   0   2  473.20    0.54   0
  -8   2  -1    0.75    0.11   0
  -8   4  -3    1.42    0.12   0
  -7  -4  14   33.11    0.20   0
  -7  -3   9   10.99    0.13   0
  -7  -2   6   17.98    0.14   0
  -7   6  -5    3.96    0.10   0
  -6  -4  13    9.63    0.12   0
  -6  -1   3   50.70    0.18   0
  -6   2  -2    4.72    0.10   0
  -5  -3   8  174.76    0.29   0
  -5  -2   5   77.30    0.20   0
  -5   1  -1   75.84    0.18   0
  -4  -4  12   32.74    0.14   0
  -3  -1   2   56.10    0.13   0
  -3   0   0  202.99    0.21   0
  -2  -4  12    4.87    0.07   0
   1   7  -7   17.46    0.09   0
   3  -2   6   27.79    0.09   0
   3   0   1    0.08    0.04   0
   3   9  -7    2.55    0.11   0
   3  10  -7   73.94    0.27   0
   3  11  -7    0.14    0.14   0
   4  -3  11    2.23    0.07   0
   4   5  -5   71.09    0.20   0
   5  -3  13   13.99    0.12   0
   5  -2   8   93.98    0.20   0
   5   8  -6    7.85    0.13   0
   6  -3  16    0.40    0.12   0
   6   1   1    5.16    0.11   0
   6   3  -2   61.15    0.21   0
   6   4  -3   23.32    0.13   0
   7   1   2  255.65    0.39   0
   7   6  -4    3.36    0.15   0
   7   8  -5   43.33    0.27   0
   7   9  -5   53.02    0.36   0
   7  10  -5   12.30    0.25   0
   7  11  -5   23.72    0.29   0
   8  -2  15   15.62    0.19   0
   8  -1   9    0.41    0.13   0
   8   8  -4   18.81    0.25   0
   8  11  -4    1.17    0.23   0
   9  -1  12   46.74    0.27   0
   9   1   5    0.44    0.12   0
   9   3   1    8.60    0.17   0
   9   8  -3    3.57    0.20   0
  10  -1  17    2.84    0.22   0
  10  -1  18    1.61    0.23   0
  10   0  10   51.51    0.30   0
  10   2   4  118.12    0.37   0
  10   4   1    5.73    0.19   0
  10   5   0   22.07    0.22   0
  10   6  -1    0.45    0.19   0
  10   8  -2    4.39    0.25   0
  11   0  14   21.04    0.29   0
  11   0  15    0.35    0.24   0
  11   2   6    6.81    0.21   0
  11   8  -1   33.94    0.34   0
  11   9  -1    0.59    0.27   0
  12   1  14    3.14    0.26   0
  12   2   9   24.45    0.32   0
  12   3   6   41.86    0.32   0
  12   5   3    0.43    0.22   0
  12   6   2   -0.24    0.24   0
  12   7   1    0.54    0.25   0
  12   8   1    8.56    0.33   0
  13   2  13    0.75    0.28   0
  13   3   9    3.13    0.28   0
  13   3  10    0.33    0.23   0
  13   4   7    7.13    0.31   0
  13   5   5    5.57    0.28   0
  13   6   4    7.70    0.32   0
 -16   0  13    0.17    0.31   0
 -16   2   8    4.45    0.24   0
 -16   3   7    1.73    0.29   0
 -15  -1  14   46.61    0.50   0
 -15   0  11   -0.19    0.28   0
 -15   3   5    0.29    0.24   0
 -15   4   4   14.77    0.34   0
 -15   5   3    0.73    0.26   0
 -15   6   2    3.03    0.29   0
 -14  -2  16   77.17    0.60   0
 -14   0   9   -0.44    0.23   0
 -14   1   7    3.43    0.24   0
 -14   2   5    7.13    0.26   0
 -14   6   1    3.23    0.28   0
 -13  -1  10   82.30    0.45   0
 -13   2   4   44.36    0.33   0
 -13   6   0    1.41    0.24   0
 -13   8  -1    6.25    0.26   0
 -12  -3  17    2.27    0.24   0
 -12   0   6  256.88    0.60   0
 -12   8  -2   13.20    0.24   0
 -11  -3  15   38.13    0.33   0
 -11   0   5    0.11    0.16   0
 -11   6  -2    0.48    0.17   0
 -11   8  -3    2.87    0.18   0
 -11   9  -3   -0.09    0.20   0
 -10  -4  20   24.71    0.32   0
 -10  -4  21    2.76    0.24   0
 -10  -2   9    1.17    0.17   0
 -10   0   4  273.14    0.49   0
 -10   6  -3    2.91    0.15   0
  -9  -4  17   12.53    0.21   0
  -9  -2   8   10.48    0.18   0
  -9   0   3    0.26    0.09   0
  -9   2   0   25.11    0.18   0
  -9   5  -3    0.65    0.12   0
  -9   7  -4   45.71    0.27   0
  -8  -4  16   23.34    0.23   0
  -8  -2   7    4.73    0.13   0
  -8   3  -2   88.80    0.25   0
  -8   8  -5    0.02    0.12   0
  -7   1   0   89.26    0.24   0
  -6  -3   9    7.01    0.11   0
  -6   3  -3   18.78    0.12   0
  -6  11  -6    8.74    0.13   0
  -4  -3   8  112.27    0.22   0
  -4   6  -6   13.09    0.08   0
  -3  -4  12  111.10    0.20   0
  -3   3  -4   38.88    0.09   0
  -2  -1   2  298.48    0.21   0
  -2   0   0   64.43    0.10   0
  -2   2  -3    9.03    0.04   0
   1   2  -3  381.69    0.20   0
   1   5  -6  162.83    0.18   0
   2   3  -4  138.96    0.17   0
   2   4  -5   71.26    0.14   0
   3  -4  16    0.66    0.06   0
   3  -1   3   71.67    0.13   0
   3   1  -1   61.74    0.13   0
   3   8  -7  208.74    0.34   0
   4   2  -2   51.39    0.14   0
   5   0   2   93.46    0.20   0
   5   1   0  102.99    0.21   0
   5   4  -4  411.55    0.44   0
   5   7  -6  210.81    0.38   0
   6  -3  15    0.32    0.12   0
   6  -2   9    7.53    0.10   0
   6   0   3    0.09    0.07   0
   6   6  -5  135.03    0.32   0
   6   9  -6    5.01    0.17   0
   6  10  -6    0.15    0.16   0
   7  -1   7    6.63    0.11   0
   7   0   4  229.62    0.37   0
   7   2   0   74.99    0.24   0
   8  -2  14    9.89    0.17   0
   8   1   3   29.74    0.16   0
   8   7  -4   19.30    0.23   0
   9  -1  11    6.11    0.16   0
   9   0   7    0.17    0.15   0
   9   2   2    9.87    0.16   0
   9   7  -3   20.20    0.26   0
  10  -1  15   13.07    0.26   0
  10  -1  16   55.93    0.39   0
  10   0   9   -0.19    0.17   0
  10   1   6   18.47    0.21   0
  10   3   2  101.52    0.36   0
  10   7  -2   31.97    0.33   0
  11   0  13   -0.10    0.22   0
  11   1   8   80.56    0.36   0
  11   4   2    3.02    0.20   0
  11   5   1   10.48    0.20   0
  11   6   0   16.50    0.25   0
  11   7  -1    1.17    0.23   0
  12   1  12    9.82    0.29   0
  12   2   8   80.16    0.44   0
  12   4   4   12.40    0.22   0
  12   8   0    1.93    0.29   0
  13   2  12    6.34    0.31   0
  13   3   8  116.91    0.51   0
  13   4   6   10.05    0.31   0
  13   6   3   20.47    0.36   0
  14   4   9    6.88    0.36   0
 -16   0  14    0.86    0.32   0
 -16   1  11   12.58    0.36   0
 -16   2   9    4.22    0.31   0
 -16   4   6   12.92    0.39   0
 -15  -1  15    5.31    0.31   0
 -15   0  12    0.25    0.26   0
 -15   1   9   10.45    0.30   0
 -15   2   7    2.60    0.22   0
 -14  -2  17    0.70    0.25   0
 -14  -2  18    4.27    0.28   0
 -14   0  10    1.90    0.24   0
 -14   3   4   55.05    0.40   0
 -14   4   3    1.23    0.24   0
 -14   5   2   35.13    0.37   0
 -14   7   1    3.56    0.28   0
 -13  -2  15    2.72    0.27   0
 -13  -1  11    1.18    0.24   0
 -13   0   8   88.09    0.47   0
 -13   1   6   22.96    0.26   0
 -13   3   3    0.88    0.22   0
 -13   5   1   -0.17    0.19   0
 -12  -3  18    3.48    0.26   0
 -12  -2  13   15.47    0.27   0
 -12  -1   9    0.49    0.15   0
 -12   2   3    8.37    0.21   0
 -12   6  -1   20.73    0.27   0
 -11  -2  11   13.04    0.22   0
 -11  -1   8   25.51    0.23   0
 -10   2   1    1.46    0.16   0
 -10   5  -2   18.18    0.19   0
  -9  -4  18    2.35    0.18   0
  -9  -4  19    0.20    0.19   0
  -9  -3  12   20.46    0.21   0
  -9   3  -1    8.64    0.15   0
  -9   4  -2   19.88    0.17   0
  -8  -3  11    4.26    0.14   0
  -8   1   1   13.87    0.14   0
  -8  10  -5   30.56    0.21   0
  -7  -4  15   -0.00    0.11   0
  -7  -1   4   76.78    0.23   0
  -7   0   2  249.46    0.37   0
  -7   5  -4  208.97    0.35   0
  -6  -4  14  196.16    0.35   0
  -6  -2   6  205.61    0.33   0
  -5  -4  13   17.94    0.13   0
  -5  -1   3   34.11    0.14   0
  -5   5  -5   21.24    0.11   0
  -4  -2   5    4.34    0.08   0
  -1  -1   2  172.56    0.12   0
   2  -4  14    0.40    0.04   0
   2   7  -7   99.23    0.19   0
   4  -4  20    3.12    0.10   0
   4  -4  22    3.17    0.11   0
   4   6  -6    0.08    0.08   0
   4   9  -7   77.12    0.28   0
   4  10  -7    8.43    0.16   0
   5  -3  12   10.63    0.11   0
   5   3  -3   81.75    0.21   0
   5   5  -5    1.81    0.10   0
   6  -3  14  222.13    0.38   0
   6   2  -1   20.36    0.12   0
   6   8  -6    2.93    0.13   0
   6  11  -6   25.88    0.28   0
   7   4  -3  237.70    0.41   0
   7   7  -5    9.18    0.17   0
   8  -2  13    0.14    0.13   0
   8  -1   8   27.47    0.18   0
   8   0   5    0.30    0.12   0
   8   3  -1    2.38    0.14   0
   8   4  -2  430.87    0.60   0
   8   5  -3   40.46    0.24   0
   8   9  -5   12.58    0.25   0
   8  10  -5    9.75    0.25   0
   8  11  -5    5.75    0.28   0
   9  -2  18   38.29    0.35   0
   9  -2  19    1.66    0.20   0
   9  -1  10   49.03    0.25   0
   9   1   4   35.36    0.20   0
   9   3   0   56.11    0.25   0
   9   4  -1    0.19    0.11   0
   9   5  -2   97.11    0.34   0
   9   6  -3    1.52    0.18   0
   9   8  -4   58.24    0.33   0
   9   9  -4   -0.03    0.22   0
   9  10  -4    5.02    0.27   0
  10  -1  13    3.23    0.20   0
  10  -1  14   15.87    0.25   0
  10   2   3    0.79    0.16   0
  10   4   0   28.23    0.24   0
  10   5  -1    8.27    0.21   0
  10   6  -2    0.46    0.19   0
  10   8  -3    8.30    0.26   0
  10   9  -3    5.38    0.25   0
  10  10  -3    1.44    0.25   0
  11   0  11    0.56    0.17   0
  11   0  12    5.18    0.20   0
  11   2   5    0.91    0.19   0
  11   3   3    6.07    0.20   0
  11   5   0    0.93    0.19   0
  11   8  -2    4.99    0.25   0
  11   9  -2    3.81    0.28   0
  12   1  10   68.92    0.45   0
  12   1  11   -0.24    0.22   0
  12   3   5    2.26    0.22   0
  12   4   3    0.13    0.21   0
  12   5   2    7.64    0.20   0
  12   6   1   19.71    0.29   0
  12   7   0   24.92    0.33   0
  13   2  11    0.30    0.20   0
  13   3   7    3.52    0.27   0
  13   4   5   11.14    0.30   0
  13   5   4    9.30    0.25   0
  13   7   2   -0.24    0.28   0
  13   8   1    5.80    0.31   0
  14   4   8    0.59    0.32   0
  14   5   6    0.25    0.31   0
  14   6   5    0.19    0.29   0
 -16   1  12    1.24    0.31   0
 -16   2  10    0.23    0.26   0
 -16   3   8    0.35    0.30   0
 -15  -1  16   30.70    0.45   0
 -15   1  10    4.36    0.28   0
 -15   3   6   30.36    0.40   0
 -15   5   4    0.56    0.26   0
 -15   6   3    3.52    0.30   0
 -14  -1  14   36.87    0.42   0
 -14   1   8    6.13    0.25   0
 -14   2   6   64.21    0.44   0
 -13  -2  16   34.33    0.39   0
 -13   0   9    0.26    0.20   0
 -13   4   2   15.13    0.26   0
 -13   7   0   65.83    0.40   0
 -12  -3  19    0.26    0.24   0
 -12  -3  20    0.42    0.27   0
 -12  -1  10    0.60    0.20   0
 -12   0   7    0.09    0.14   0
 -12   1   5    1.16    0.13   0
 -12   3   2   26.18    0.25   0
 -12   4   1    8.04    0.21   0
 -12   5   0   13.74    0.22   0
 -12   7  -1    0.53    0.19   0
 -11  -3  16    0.63    0.18   0
 -11  -3  17    2.79    0.22   0
 -11   0   6    2.10    0.16   0
 -11   1   4    0.25    0.16   0
 -11   3   1    6.31    0.19   0
 -11   4   0   44.41    0.26   0
 -11   7  -2   20.96    0.25   0
 -10  -3  14    1.34    0.13   0
 -10  -2  10    0.88    0.17   0
 -10  -1   7   68.11    0.29   0
 -10   1   3   26.45    0.20   0
 -10   3   0   10.69    0.17   0
 -10   4  -1    5.38    0.16   0
 -10   7  -3   31.68    0.25   0
  -9  -4  20   21.79    0.23   0
  -9  -4  21   27.03    0.29   0
  -9  -3  13    0.13    0.15   0
  -9  -2   9   63.73    0.27   0
  -9  -1   6   28.99    0.20   0
  -9   1   2  146.43    0.34   0
  -9   8  -4    2.69    0.15   0
  -8  -4  17    0.30    0.15   0
  -8  -4  18   20.49    0.24   0
  -8  -2   8   -0.11    0.12   0
  -8  -1   5   42.37    0.18   0
  -8   0   3   -0.19    0.12   0
  -8   6  -4   88.43    0.26   0
  -7  -4  16   13.36    0.18   0
  -7   2  -1   40.38    0.17   0
  -7   7  -5   17.51    0.15   0
  -6   6  -5   43.83    0.16   0
  -6   9  -6    1.79    0.09   0
  -6  10  -6   27.06    0.16   0
  -5  -3   9   34.86    0.15   0
  -5   0   1    0.02    0.06   0
  -5   2  -2   25.06    0.11   0
  -4  -4  13    2.17    0.09   0
  -4   1  -1   17.74    0.09   0
  -3  -3   8    9.31    0.08   0
  -2   4  -5  139.55    0.11   0
  -1   0   0  412.41    0.16   0
   0  -4  13   68.17    0.08   0
   0  -3   8    7.20    0.03   0
   2   5  -6  272.08    0.28   0
   3   3  -4  750.68    0.46   0
   3   4  -5   14.52    0.10   0
   3   7  -7    3.03    0.09   0
   4  -4  19    5.73    0.11   0
   4   0   1    0.04    0.07   0
   4   8  -7    8.47    0.12   0
   5  -2   7    6.92    0.10   0
   5  -1   4    4.17    0.09   0
   5  10  -7    1.57    0.17   0
   6  -1   5    0.65    0.09   0
   6   7  -6   20.61    0.19   0
   7  -3  18   15.04    0.21   0
   7  -3  19    0.72    0.15   0
   7  -3  20   27.54    0.25   0
   7  -2  10  185.54    0.34   0
   7  -1   6  108.49    0.26   0
   7   3  -2   24.76    0.17   0
   7   5  -4    3.36    0.14   0
   7   9  -6    0.07    0.17   0
   7  10  -6   -0.14    0.19   0
   8  -2  12   22.56    0.17   0
   8   1   2   42.42    0.20   0
   8   6  -4   33.82    0.24   0
   8   8  -5    0.05    0.17   0
   9  -2  16    9.75    0.23   0
   9  -2  17    2.78    0.18   0
   9   7  -4   13.73    0.21   0
  10  -1  12   11.55    0.20   0
  10   0   8   41.48    0.28   0
  10   1   5    0.42    0.16   0
  10   3   1   16.68    0.20   0
  10   7  -3   29.64    0.28   0
  11   4   1    6.78    0.21   0
  11   6  -1  100.33    0.48   0
  11   7  -2    0.90    0.22   0
  12   0  15   -0.14    0.26   0
  12   1   9    9.98    0.25   0
  12   2   6  129.52    0.48   0
  12   3   4    0.20    0.20   0
  12   5   1    0.62    0.23   0
  12   6   0    6.76    0.26   0
  12   8  -1    5.71    0.30   0
  13   2   9    5.47    0.28   0
  13   3   6    8.34    0.27   0
  13   5   3    4.26    0.26   0
  13   6   2   71.70    0.59   0
  13   7   1    8.40    0.35   0
  14   3   9    1.18    0.28   0
  14   3  10    2.38    0.29   0
  14   4   7    3.68    0.30   0
  14   5   5    1.58    0.30   0
  14   6   4    0.76    0.32   0
 -16   1  13    3.98    0.34   0
 -16   4   7    0.32    0.29   0
 -15   0  13    0.25    0.20   0
 -15   3   7    0.10    0.25   0
 -14  -1  15    4.94    0.31   0
 -14   0  11    0.17    0.21   0
 -14   3   5    6.20    0.25   0
 -14   6   2    5.35    0.26   0
 -13  -2  17    1.05    0.25   0
 -13  -1  12   64.28    0.39   0
 -13   1   7    3.90    0.23   0
 -13   2   5    0.38    0.16   0
 -13   6   1    4.31    0.23   0
 -13   8   0   -0.10    0.22   0
 -12  -2  14   46.58    0.35   0
 -12   2   4   57.22    0.31   0
 -12   8  -1    9.35    0.25   0
 -11  -3  18    2.39    0.24   0
 -11  -2  12   30.12    0.23   0
 -11   8  -2   29.40    0.29   0
 -10  -3  15   35.96    0.28   0
 -10   0   5    0.20    0.10   0
 -10   8  -3    2.43    0.17   0
  -9  -4  22    6.18    0.21   0
  -9   0   4  203.14    0.39   0
  -9   6  -3    8.19    0.14   0
  -9   9  -4    9.03    0.19   0
  -9  10  -4    2.92    0.17   0
  -8  -4  19   42.22    0.29   0
  -8  -3  12    0.11    0.13   0
  -8   2   0  111.11    0.28   0
  -7  -4  17    5.64    0.17   0
  -7  -3  11    0.26    0.11   0
  -7   3  -2   58.60    0.19   0
  -7   4  -3  105.50    0.25   0
  -6  -4  15   10.16    0.13   0
  -6  -1   4  303.96    0.39   0
  -6   1   0    2.72    0.07   0
  -5  -4  14   22.86    0.14   0
  -5   3  -3    2.53    0.09   0
  -5   4  -4   40.59    0.14   0
  -3  -4  13   -0.08    0.07   0
  -3  -2   5   16.08    0.08   0
   2  -2   5    8.46    0.04   0
   2   2  -3  245.63    0.21   0
   3  -4  15   27.76    0.10   0
   3  -3   9    6.45    0.06   0
   4  -4  18   67.35    0.21   0
   4  -2   6  168.90    0.22   0
   4   1  -1   26.87    0.11   0
   5   2  -2   94.22    0.20   0
   5   6  -6    7.83    0.11   0
   5   9  -7    6.78    0.17   0
   5  11  -7    8.59    0.21   0
   6  -3  13   12.33    0.14   0
   6  -2   8   40.37    0.16   0
   6   4  -4  110.94    0.27   0
   7  -3  16    2.17    0.13   0
   7   0   3   -0.04    0.10   0
   7   6  -5    3.80    0.15   0
   7   8  -6    0.18    0.13   0
   7  11  -6    7.00    0.22   0
   8  -1   7    6.79    0.13   0
   8   0   4  324.38    0.46   0
   8   2   0  118.87    0.30   0
   8   7  -5    0.27    0.16   0
   9  -2  15   12.78    0.21   0
   9  -1   9   21.02    0.20   0
   9   1   3   12.73    0.17   0
   9   2   1    3.08    0.14   0
   9   4  -2   98.67    0.33   0
   9   5  -3   47.65    0.26   0
   9  10  -5    2.18    0.24   0
  10  -1  11    0.10    0.18   0
  10   0   7    0.19    0.18   0
  10   2   2    4.13    0.16   0
  10   5  -2   77.63    0.32   0
  10   9  -4    3.95    0.26   0
  10  10  -4    0.91    0.26   0
  11  -1  16   12.69    0.26   0
  11  -1  17    5.52    0.26   0
  11   0  10   13.71    0.20   0
  11   1   6    6.22    0.19   0
  11   2   4   43.84    0.26   0
  11   3   2   80.11    0.36   0
  11   9  -3    3.72    0.27   0
  12   0  13    0.25    0.23   0
  12   0  14   13.97    0.33   0
  12   4   2   76.90    0.44   0
  12   7  -1   14.55    0.32   0
  13   1  12    5.04    0.27   0
  13   1  13    5.80    0.27   0
  13   2   8    0.93    0.25   0
  13   4   4    7.39    0.22   0
  13   5   2    3.07    0.24   0
  13   6   1    3.64    0.27   0
  13   8   0   -0.29    0.33   0
  14   3   8    0.42    0.27   0
  14   4   6   16.40    0.37   0
  14   5   4    5.36    0.28   0
  14   6   3    1.50    0.30   0
 -16   2  11    7.05    0.33   0
 -16   3   9    7.73    0.28   0
 -16   4   8    9.44    0.35   0
 -15   0  14    4.83    0.25   0
 -15   1  11    0.53    0.20   0
 -15   2   9    1.46    0.27   0
 -15   6   4   36.87    0.42   0
 -14  -1  16   14.69    0.36   0
 -14   0  12   14.87    0.29   0
 -14   1   9    0.38    0.17   0
 -14   2   7    2.18    0.20   0
 -14   7   2    6.38    0.28   0
 -13  -2  18    4.28    0.27   0
 -13  -2  19    0.40    0.24   0
 -13  -1  13    2.64    0.25   0
 -13   0  10   21.05    0.27   0
 -13   3   4   18.05    0.23   0
 -13   4   3    0.44    0.21   0
 -12  -2  15   19.90    0.30   0
 -12  -1  11   34.74    0.31   0
 -12   0   8   47.68    0.29   0
 -12   1   6    4.74    0.19   0
 -12   3   3   22.29    0.24   0
 -12   6   0    9.44    0.22   0
 -11  -3  19    5.07    0.25   0
 -11  -3  20   78.41    0.52   0
 -11   0   7    0.07    0.15   0
 -11   2   3    7.95    0.18   0
 -11   6  -1    5.53    0.18   0
 -11   9  -2   15.75    0.28   0
 -10  -3  16    3.97    0.20   0
 -10  -2  11   62.65    0.28   0
 -10  -1   8    0.35    0.15   0
 -10   2   2    0.94    0.15   0
 -10   6  -2   10.51    0.17   0
 -10   9  -3    5.45    0.19   0
  -9  -2  10   40.62    0.24   0
  -9   2   1    1.81    0.13   0
  -8  -4  20   23.48    0.23   0
  -8  -4  21    0.25    0.19   0
  -8   3  -1   10.51    0.13   0
  -8   4  -2   13.58    0.14   0
  -8   5  -3    0.78    0.11   0
  -8   7  -4  101.14    0.31   0
  -7  -4  18   42.49    0.27   0
  -7  -1   5   29.44    0.16   0
  -7   1   1   90.46    0.23   0
  -7   8  -5   35.34    0.19   0
  -6  -4  16   28.39    0.19   0
  -6   0   2  279.89    0.36   0
  -5  -2   6  113.58    0.22   0
  -4  -4  14    0.31    0.09   0
  -4  -3   9   11.19    0.11   0
  -4  -1   3    3.76    0.08   0
  -4   0   1    0.03    0.06   0
  -3   9  -7   25.47    0.07   0
  -2  -4  13    0.78    0.06   0
  -2   3  -4  104.84    0.10   0
  -1  -4  13    0.14    0.04   0
   3   5  -6  166.10    0.24   0
   4  -4  17    9.72    0.09   0
   4  -1   3    4.11    0.07   0
   4   4  -5   44.83    0.15   0
   4   7  -7    0.15    0.10   0
   5  -3  11   24.55    0.12   0
   5   8  -7    5.39    0.13   0
   6   0   2   48.15    0.16   0
   6   3  -3   25.92    0.13   0
   6   5  -5   52.06    0.21   0
   6   9  -7    7.07    0.19   0
   6  10  -7    2.03    0.18   0
   7  -3  15    0.27    0.12   0
   7  -2   9    5.73    0.11   0
   8   4  -3    7.29    0.15   0
   8   5  -4   89.12    0.30   0
   8   9  -6   33.33    0.30   0
   8  10  -6    8.32    0.23   0
   9  -2  14    0.96    0.16   0
   9  -1   8   45.97    0.23   0
   9   0   5   -0.06    0.14   0
   9   3  -1    0.04    0.15   0
   9   6  -4   60.57    0.30   0
   9   8  -5    0.14    0.18   0
   9   9  -5    0.30    0.19   0
  10   1   4   16.86    0.20   0
  10   3   0   11.19    0.18   0
  10   6  -3   55.70    0.33   0
  10   8  -4    9.25    0.25   0
  11  -1  14   14.72    0.27   0
  11  -1  15    2.65    0.22   0
  11   0   9    0.38    0.18   0
  11   2   3    5.60    0.18   0
  11   4   0   41.67    0.29   0
  11   5  -1    9.22    0.19   0
  11   6  -2    1.36    0.22   0
  11   8  -3    2.65    0.24   0
  12   0  12   16.04    0.30   0
  12   1   8   65.75    0.42   0
  12   2   5    8.46    0.24   0
  12   3   3    1.79    0.21   0
  12   6  -1    4.98    0.26   0
  12   8  -2   21.11    0.39   0
  12   9  -2   13.49    0.27   0
  13   1  11    0.97    0.24   0
  13   2   7    3.45    0.26   0
  13   3   5   16.67    0.29   0
  13   4   3   28.93    0.33   0
  13   7   0   45.40    0.53   0
  14   2  10    9.70    0.30   0
  14   2  11   -0.08    0.26   0
  14   4   5    0.12    0.28   0
 -16   2  12   17.49    0.40   0
 -15   0  15    0.40    0.23   0
 -15   0  16   24.44    0.41   0
 -15   1  12    7.12    0.29   0
 -15   2  10    0.05    0.26   0
 -15   3   8    5.63    0.29   0
 -14  -1  17    4.39    0.31   0
 -14   0  13    0.42    0.26   0
 -14   3   6   24.00    0.28   0
 -14   6   3    1.94    0.26   0
 -13  -1  14    4.86    0.26   0
 -13   1   8   64.35    0.38   0
 -13   2   6  103.10    0.43   0
 -13   7   1   12.31    0.28   0
 -12  -2  16   13.93    0.27   0
 -12  -1  12   74.21    0.36   0
 -12   0   9   -0.18    0.18   0
 -12   4   2   28.70    0.26   0
 -12   5   1    3.19    0.19   0
 -12   7   0   17.95    0.28   0
 -11  -3  21    0.25    0.24   0
 -11  -2  14   58.06    0.32   0
 -11  -1  10   11.38    0.22   0
 -11   1   5    0.71    0.12   0
 -11   3   2   12.08    0.21   0
 -11   4   1   50.72    0.29   0
 -11   5   0    0.63    0.17   0
 -10  -3  17    3.55    0.20   0
 -10  -2  12  139.10    0.40   0
 -10   0   6    6.86    0.16   0
 -10   1   4   17.67    0.18   0
 -10   3   1   66.76    0.28   0
 -10   4   0   26.47    0.21   0
 -10   5  -1   67.50    0.28   0
  -9  -3  15    3.47    0.17   0
  -9   0   5   -0.15    0.12   0
  -9   1   3    2.62    0.13   0
  -9   3   0   53.90    0.23   0
  -9   4  -1   24.77    0.18   0
  -9   5  -2   32.49    0.21   0
  -9   7  -3    6.29    0.18   0
  -8  -4  22   -0.04    0.18   0
  -8  -4  23   11.94    0.23   0
  -8  -3  13    4.53    0.15   0
  -8  -2   9    4.17    0.13   0
  -8  -1   6   59.91    0.21   0
  -7  -4  19    5.65    0.18   0
  -7  -3  12  128.13    0.30   0
  -7  -2   8    2.16    0.11   0
  -7   0   3    0.10    0.11   0
  -7   6  -4   47.87    0.19   0
  -7   9  -5   61.19    0.25   0
  -7  10  -5   18.51    0.17   0
  -7  11  -5   10.89    0.17   0
  -6  -4  17   14.49    0.17   0
  -6  -2   7   68.44    0.20   0
  -6   2  -1    3.07    0.10   0
  -6   5  -4    5.43    0.11   0
  -5  -4  15    8.45    0.11   0
  -5  -3  10   65.04    0.19   0
  -4   5  -5    0.69    0.06   0
  -3  10  -7   13.29    0.07   0
  -2  -2   5    2.66    0.05   0
   1   0   0  419.47    0.16   0
   1  10  -8   13.59    0.11   0
   2  10  -8   11.72    0.12   0
   3   2  -3    3.25    0.06   0
   4   3  -4  226.36    0.29   0
   4   5  -6  269.78    0.34   0
   5   0   1   -0.02    0.08   0
   6  -1   4   74.21    0.20   0
   6   6  -6   14.73    0.14   0
   6   8  -7    0.28    0.14   0
   6  11  -7    7.18    0.21   0
   7  -3  14   13.90    0.16   0
   7  -1   5   20.25    0.14   0
   7   4  -4    0.34    0.12   0
   7   7  -6   33.81    0.23   0
   8  -2  10    1.80    0.13   0
   8  -1   6   48.44    0.20   0
   8   1   1   13.81    0.15   0
   8   3  -2   99.34    0.28   0
   8   6  -5   10.58    0.17   0
   8   8  -6   33.79    0.24   0
   9  -2  13    2.80    0.16   0
   9   1   2   63.72    0.24   0
   9   7  -5   36.37    0.30   0
  10  -2  17   11.03    0.26   0
  10  -2  18   20.32    0.29   0
  10  -1  10  109.14    0.40   0
  10   0   6    0.53    0.16   0
  10   7  -4    5.81    0.22   0
  11  -1  13    2.83    0.20   0
  11   0   8   79.68    0.37   0
  11   1   5   -0.37    0.18   0
  11   3   1  115.27    0.40   0
  11   7  -3   11.04    0.27   0
  11   9  -4    0.22    0.23   0
  12   0  11    0.06    0.21   0
  12   1   7    0.14    0.21   0
  12   2   4    2.88    0.20   0
  12   4   1    2.44    0.16   0
  12   7  -2    4.06    0.27   0
  13   1  10    4.26    0.25   0
  13   2   6   28.17    0.34   0
  13   3   4   18.38    0.29   0
  13   5   1    5.47    0.26   0
  13   6   0    0.94    0.28   0
  13   8  -1    1.14    0.28   0
  14   2   9    1.00    0.28   0
  14   3   6    8.01    0.30   0
  14   4   4    0.11    0.23   0
  14   5   3    6.36    0.29   0
  14   6   2    5.50    0.26   0
  14   7   1    1.94    0.33   0
 -16   2  13   35.21    0.43   0
 -15   4   7   22.68    0.39   0
 -14  -1  18   13.73    0.34   0
 -14   0  14  133.24    0.55   0
 -14   1  11    4.68    0.24   0
 -14   3   7    3.33    0.25   0
 -14   7   3    0.06    0.24   0
 -13  -1  15   11.55    0.27   0
 -13   0  11    0.05    0.17   0
 -13   1   9   26.24    0.28   0
 -13   2   7    1.64    0.20   0
 -13   3   5    0.82    0.21   0
 -13   5   3    0.45    0.20   0
 -13   8   1    2.28    0.23   0
 -12  -2  17   -0.05    0.22   0
 -12  -2  18    6.13    0.24   0
 -12  -1  13   26.67    0.28   0
 -12   1   7   26.27    0.25   0
 -12   2   5   46.94    0.28   0
 -11   0   8   19.58    0.22   0
 -11   2   4   10.02    0.20   0
 -11   7  -1   53.96    0.33   0
 -10  -3  18  153.16    0.50   0
 -10  -3  19    1.00    0.21   0
 -10  -1   9   48.68    0.26   0
 -10   7  -2    3.10    0.16   0
  -9  -3  16   19.97    0.22   0
  -9  -2  11    1.16    0.16   0
  -8  -3  14   18.95    0.19   0
  -8   0   4   12.35    0.12   0
  -8   8  -4   11.16    0.17   0
  -7  -4  20    5.96    0.17   0
  -7  -4  21   24.05    0.24   0
  -6  -3  11   48.62    0.18   0
  -6   3  -2   11.04    0.10   0
  -6   7  -5   86.63    0.22   0
  -5  -4  16    4.87    0.12   0
  -5  -1   4   80.16    0.19   0
  -5   1   0  101.02    0.20   0
  -5  11  -6    0.47    0.09   0
  -4  -2   6  406.50    0.36   0
  -4   2  -2  357.50    0.30   0
  -3  -4  14    7.22    0.09   0
  -3   1  -1   40.67    0.09   0
  -3   6  -6  141.67    0.15   0
   0  10  -8    3.86    0.07   0
   1   6  -7   52.86    0.11   0
   1   9  -8   34.56    0.12   0
   1  11  -8    1.97    0.09   0
   2   0   0   63.75    0.10   0
   2   6  -7    2.09    0.06   0
   2   9  -8   88.88    0.20   0
   2  11  -8    0.78    0.11   0
   3   9  -8    0.57    0.10   0
   3  10  -8    0.73    0.10   0
   3  11  -8   29.00    0.20   0
   4  -4  16    0.61    0.07   0
   5  -4  20    4.80    0.11   0
   5  -4  21    2.94    0.11   0
   5   1  -1   90.85    0.19   0
   5   4  -5  151.21    0.27   0
   5   7  -7   13.96    0.14   0
   6  -2   7   11.41    0.11   0
   7  -2   8  143.94    0.29   0
   7   0   2    0.78    0.11   0
   7   1   0   90.83    0.24   0
   7   3  -3   60.77    0.21   0
   7   5  -5   74.61    0.26   0
   7   9  -7    0.68    0.18   0
   7  10  -7    8.81    0.19   0
   7  11  -7    0.17    0.21   0
   8  -3  17    7.31    0.18   0
   8  -3  18   -0.15    0.16   0
   8  -3  19    3.60    0.19   0
   8   0   3    0.08    0.12   0
   8   2  -1   32.98    0.19   0
   9  -2  12    6.17    0.16   0
   9  -1   7    0.33    0.13   0
   9   0   4  156.74    0.36   0
   9   2   0   25.21    0.17   0
   9   4  -3   41.68    0.24   0
   9   5  -4    0.22    0.15   0
   9  10  -6   35.66    0.32   0
  10  -2  15    0.92    0.18   0
  10  -2  16   11.72    0.22   0
  10  -1   9    6.84    0.18   0
  10   1   3    9.60    0.17   0
  10   2   1   52.04    0.24   0
  10   4  -2   13.38    0.20   0
  10   5  -3   18.96    0.23   0
  10   6  -4   25.31    0.23   0
  10   8  -5   30.50    0.29   0
  10   9  -5    1.42    0.24   0
  10  10  -5    7.71    0.25   0
  11   0   7    0.04    0.19   0
  11   2   2    0.20    0.17   0
  11   4  -1   52.69    0.30   0
  11   5  -2   73.52    0.37   0
  11   6  -3    8.73    0.23   0
  11   8  -4    6.57    0.26   0
  12   0  10    7.32    0.23   0
  12   1   6   37.94    0.28   0
  12   3   2    2.74    0.15   0
  12   4   0   14.85    0.23   0
  12   6  -2    0.89    0.23   0
  12   8  -3   10.41    0.30   0
  12   9  -3    0.43    0.21   0
  13   0  13    0.14    0.24   0
  13   1   9    3.51    0.20   0
  13   4   2   15.64    0.24   0
  13   7  -1    9.04    0.28   0
  13   8  -2    1.54    0.27   0
  14   2   8    3.23    0.29   0
  14   5   2   14.82    0.32   0
  14   6   1   23.55    0.43   0
  15   4   6    7.16    0.36   0
  15   5   4    2.41    0.31   0
 -15   1  14   51.09    0.48   0
 -15   4   8    2.43    0.28   0
 -14   0  15    0.28    0.28   0
 -14   2   9   17.24    0.30   0
 -14   4   6   64.30    0.40   0
 -14   5   5    5.16    0.25   0
 -13  -1  16   49.13    0.39   0
 -13   0  12   22.92    0.29   0
 -13   7   2   15.28    0.32   0
 -12  -2  19    0.46    0.24   0
 -12  -2  20    4.77    0.30   0
 -12   0  10    1.22    0.19   0
 -12   3   4    0.30    0.17   0
 -12   4   3    0.68    0.19   0
 -12   5   2    5.58    0.20   0
 -12   6   1    6.37    0.20   0
 -12   8   0    2.40    0.21   0
 -11  -2  16    6.88    0.24   0
 -11  -1  11   24.05    0.21   0
 -11   1   6   29.84    0.23   0
 -11   6   0   17.39    0.22   0
 -11   8  -1    0.28    0.16   0
 -10  -3  20   89.29    0.42   0
 -10  -3  21    2.40    0.22   0
 -10   0   7    0.01    0.15   0
 -10   2   3    9.80    0.18   0
 -10   8  -2    0.65    0.17   0
  -9  -3  17    1.85    0.17   0
  -9  -1   8   14.71    0.17   0
  -9   2   2  317.88    0.49   0
  -9   8  -3   11.25    0.17   0
  -8  -2  10  130.68    0.33   0
  -8  -1   7   61.43    0.23   0
  -8   2   1   31.56    0.17   0
  -8   6  -3    3.58    0.11   0
  -8   9  -4   32.00    0.22   0
  -8  10  -4    5.58    0.15   0
  -7  -4  22   43.90    0.28   0
  -7  -4  23    0.98    0.18   0
  -7  -3  13   23.04    0.17   0
  -7   2   0   71.41    0.20   0
  -7   5  -3   11.40    0.13   0
  -6  -4  18   14.15    0.16   0
  -6  -4  19   -0.03    0.15   0
  -6  -1   5    0.47    0.10   0
  -5  -2   7    1.66    0.09   0
  -5   0   2  211.31    0.28   0
  -5   6  -5  105.59    0.20   0
  -5   9  -6   12.89    0.10   0
  -4  -4  15   22.34    0.13   0
  -4   7  -6   17.72    0.09   0
  -3  -3   9    3.20    0.07   0
  -3  -1   3   98.19    0.15   0
   0   9  -8    1.73    0.05   0
   0  11  -8   25.96    0.11   0
   2   8  -8   19.82    0.11   0
   3   6  -7  396.59    0.38   0
   4   2  -3  183.93    0.25   0
   4   6  -7   52.15    0.19   0
   4   9  -8   19.98    0.16   0
   4  10  -8    2.78    0.13   0
   4  11  -8   57.82    0.25   0
   5  -4  18   47.84    0.21   0
   5  -3  10  109.61    0.21   0
   5  -2   6    3.77    0.08   0
   5  -1   3   85.59    0.19   0
   5   3  -4  154.90    0.26   0
   5   5  -6  252.54    0.36   0
   6  -3  11    9.45    0.11   0
   7  -3  13   22.80    0.17   0
   7   2  -2  369.58    0.46   0
   7   6  -6   27.04    0.19   0
   7   8  -7    5.75    0.15   0
   8  -3  16    5.36    0.17   0
   8  -2   9   15.69    0.15   0
   8   4  -4  108.75    0.30   0
   8   7  -6   16.96    0.21   0
   9   3  -2  525.90    0.65   0
   9   6  -5   23.66    0.21   0
   9   8  -6   67.37    0.32   0
   9   9  -6   25.08    0.28   0
  10  -2  14    0.74    0.17   0
  10   0   5    0.14    0.16   0
  10   3  -1   64.00    0.27   0
  11  -1  11    0.75    0.18   0
  11   1   4   61.39    0.28   0
  11   3   0   99.84    0.37   0
  11   7  -4    0.12    0.22   0
  12  -1  14    3.24    0.26   0
  12  -1  15    7.39    0.25   0
  12   0   9    0.19    0.21   0
  12   2   3    2.20    0.20   0
  12   3   1    1.70    0.19   0
  12   7  -3    6.84    0.28   0
  13   0  12    0.17    0.25   0
  13   1   8   31.93    0.34   0
  13   2   5    0.33    0.21   0
  13   3   3    0.15    0.15   0
  13   4   1   13.36    0.25   0
  13   5   0   76.42    0.49   0
  13   6  -1    4.95    0.28   0
  13   7  -2   13.10    0.32   0
  14   1  11    7.35    0.32   0
  14   2   7    0.20    0.26   0
  14   3   5    1.05    0.21   0
  14   4   3    0.01    0.23   0
  15   3   7    0.10    0.31   0
  15   4   5    2.49    0.32   0
  15   5   3    4.16    0.29   0
 -15   2  12    0.30    0.26   0
 -15   5   7    0.48    0.29   0
 -14   0  16   74.61    0.59   0
 -14   1  12   98.98    0.56   0
 -14   2  10   -0.11    0.23   0
 -14   3   8  116.76    0.48   0
 -13  -1  17   26.10    0.33   0
 -13  -1  18    0.44    0.23   0
 -13   0  13    0.39    0.23   0
 -13   2   8    0.34    0.21   0
 -13   3   6   35.91    0.32   0
 -13   6   3    2.64    0.21   0
 -12  -2  21    3.65    0.30   0
 -12  -1  14    1.04    0.20   0
 -12   0  11   -0.34    0.18   0
 -12   2   6    6.61    0.19   0
 -12   7   1   14.46    0.27   0
 -11  -2  17    1.38    0.21   0
 -11   0   9   -0.27    0.17   0
 -11   4   2   28.56    0.23   0
 -11   5   1   11.60    0.20   0
 -11   9  -1   31.72    0.29   0
 -10  -3  22    3.49    0.23   0
 -10  -2  14    3.67    0.18   0
 -10  -1  10   76.87    0.32   0
 -10   1   5   39.62    0.21   0
 -10   3   2  110.61    0.33   0
 -10   6  -1   33.91    0.23   0
 -10   9  -2   24.35    0.29   0
 -10  10  -2    4.42    0.21   0
  -9  -3  18  173.45    0.44   0
  -9  -2  12  124.87    0.37   0
  -9   0   6  103.88    0.29   0
  -9   1   4   17.38    0.16   0
  -9   6  -2   73.85    0.26   0
  -9   9  -3    0.18    0.17   0
  -9  10  -3    0.29    0.17   0
  -8  -3  15    2.46    0.15   0
  -8   5  -2  250.14    0.42   0
  -7  -2   9   16.37    0.12   0
  -7  -1   6   18.96    0.12   0
  -7   3  -1    7.61    0.11   0
  -7   4  -2   42.81    0.17   0
  -6  -4  20   59.11    0.26   0
  -6  -3  12    2.06    0.10   0
  -6  -2   8   22.88    0.14   0
  -6   0   3    0.00    0.09   0
  -6   1   1   32.76    0.15   0
  -5  -4  17   14.61    0.13   0
  -5  10  -6   25.29    0.14   0
  -4  -4  16    6.11    0.11   0
  -4   3  -3    1.33    0.06   0
  -4   4  -4    8.80    0.07   0
  -3   0   1    0.03    0.06   0
  -2  -4  14   27.44    0.11   0
  -1  -2   5   13.28    0.05   0
   1   8  -8   14.02    0.09   0
   2  -1   2  115.46    0.12   0
   3  -4  14    1.25    0.05   0
   3   0   0  203.21    0.20   0
   3   8  -8    0.72    0.09   0
   4  -4  15    3.12    0.07   0
   4   8  -8   70.20    0.24   0
   5   2  -3  116.32    0.23   0
   5   9  -8  128.64    0.32   0
   5  10  -8    0.48    0.12   0
   5  11  -8    4.02    0.18   0
   6   0   1   -0.07    0.07   0
   6   1  -1   34.13    0.15   0
   6   3  -4   80.50    0.22   0
   6   4  -5  157.13    0.31   0
   6   5  -6  304.08    0.42   0
   7  -1   4   23.75    0.15   0
   8  -3  15    1.74    0.13   0
   8  -1   5    6.15    0.13   0
   8   1   0  270.83    0.42   0
   8   5  -5    1.85    0.14   0
   8   9  -7    4.86    0.19   0
   8  10  -7    0.78    0.18   0
   9  -2  10    5.65    0.15   0
   9  -1   6   86.09    0.28   0
   9   1   1   85.08    0.28   0
   9   2  -1    1.94    0.13   0
  10  -2  13    8.08    0.20   0
  10   1   2   20.19    0.19   0
  10   2   0    1.19    0.14   0
  10   7  -5   18.22    0.22   0
  10  10  -6   21.04    0.30   0
  11  -1  10   58.89    0.33   0
  11   0   6  174.01    0.47   0
  11   1   3    2.91    0.17   0
  11   2   1   14.37    0.20   0
  11   4  -2   27.16    0.24   0
  11   5  -3    1.18    0.19   0
  11   8  -5    0.06    0.20   0
  11   9  -5   10.92    0.30   0
  12  -1  13    3.04    0.24   0
  12   0   8   31.33    0.31   0
  12   1   5    8.46    0.18   0
  12   4  -1    7.82    0.20   0
  12   6  -3   20.94    0.27   0
  12   8  -4   41.99    0.40   0
  12   9  -4   10.01    0.29   0
  13   0  11   -0.11    0.23   0
  13   1   7   22.55    0.30   0
  13   2   4    5.95    0.24   0
  13   3   2    9.46    0.24   0
  13   8  -3    2.38    0.26   0
  14   1   9    0.77    0.23   0
  14   1  10    0.52    0.23   0
  14   2   6   16.13    0.33   0
  14   3   4    1.04    0.26   0
  14   4   2    1.74    0.25   0
  14   5   1   -0.17    0.20   0
  14   6   0   15.20    0.30   0
  14   7  -1    2.78    0.32   0
  15   3   6    2.07    0.31   0
  15   4   4   46.24    0.49   0
 -15   3  11    0.11    0.26   0
 -15   4   9   -0.14    0.29   0
 -15   5   8    0.47    0.27   0
 -14   0  17    0.18    0.30   0
 -14   4   7    0.24    0.26   0
 -14   5   6    2.10    0.24   0
 -14   6   5    3.07    0.26   0
 -14   7   4    4.64    0.27   0
 -13   0  14   25.27    0.30   0
 -13   1  11    0.63    0.20   0
 -13   4   5   11.55    0.22   0
 -13   5   4    3.78    0.24   0
 -13   8   2    1.46    0.22   0
 -12  -1  15   12.57    0.27   0
 -12   6   2    0.70    0.21   0
 -11  -2  18   58.70    0.35   0
 -11  -1  13    0.15    0.16   0
 -11   1   7    9.69    0.18   0
 -11   2   5    2.05    0.16   0
 -11   7   0    1.06    0.17   0
 -10  -2  15   28.02    0.24   0
 -10   0   8  173.88    0.42   0
 -10   4   1    8.69    0.17   0
 -10   5   0   24.52    0.21   0
  -9  -3  19   14.29    0.22   0
  -9  -3  20    7.67    0.23   0
  -9  -2  13   40.15    0.27   0
  -9  -1   9   40.13    0.23   0
  -9   3   1    0.14    0.09   0
  -9   4   0   15.90    0.16   0
  -9   5  -1    6.74    0.14   0
  -8  -3  16  111.11    0.34   0
  -8  -2  11   29.29    0.19   0
  -8   0   5    0.23    0.08   0
  -8   1   3   16.00    0.12   0
  -8   3   0  300.51    0.42   0
  -8   4  -1   56.86    0.21   0
  -7  -3  14    1.64    0.13   0
  -7   0   4   17.13    0.14   0
  -7   1   2    0.24    0.07   0
  -7   7  -4   35.88    0.17   0
  -6  -4  21    1.26    0.14   0
  -6  -4  22  171.80    0.43   0
  -6  -4  23   22.02    0.23   0
  -6  -4  24    2.63    0.18   0
  -6   8  -5   25.00    0.15   0
  -5  -4  18    4.51    0.12   0
  -5   2  -1  181.61    0.25   0
  -3  -4  15   16.34    0.11   0
  -3  -2   6  416.59    0.32   0
  -2  -3   9   11.45    0.07   0
   0   6  -7    0.24    0.03   0
   2   1  -2  295.37    0.21   0
   3  -1   2   37.46    0.09   0
   3   1  -2   55.98    0.12   0
   4  -2   5   23.97    0.09   0
   4   0   0 1117.27    0.55   0
   5  -4  17   11.86    0.12   0
   5   6  -7   18.22    0.13   0
   5   8  -8    1.43    0.13   0
   6  -2   6    9.52    0.10   0
   6  -1   3   98.11    0.22   0
   6   9  -8   77.59    0.37   0
   6  10  -8    7.05    0.17   0
   6  11  -8    0.28    0.17   0
   7  -3  12  117.26    0.28   0
   7  -2   7   14.82    0.12   0
   7   7  -7   14.57    0.17   0
   8  -3  14    0.78    0.12   0
   8  -2   8   82.80    0.24   0
   8   0   2   26.04    0.16   0
   8   2  -2  512.61    0.57   0
   8   6  -6   92.34    0.33   0
   9   0   3    0.20    0.09   0
   9   7  -6    8.93    0.19   0
   9  10  -7    2.87    0.22   0
  10  -2  12   19.13    0.22   0
  10  -1   7   14.24    0.19   0
  10   0   4    2.67    0.16   0
  10   3  -2  117.21    0.34   0
  10   4  -3    0.84    0.12   0
  10   5  -4    9.37    0.19   0
  10   8  -6   20.10    0.29   0
  10   9  -6    0.17    0.20   0
  11  -2  16   50.22    0.38   0
  11  -1   9    1.00    0.18   0
  11   6  -4   96.34    0.44   0
  12  -1  12    8.55    0.26   0
  12   0   7    0.05    0.18   0
  12   1   4    2.88    0.19   0
  12   2   2   17.41    0.23   0
  12   7  -4   -0.01    0.22   0
  13   0  10   15.04    0.29   0
  13   1   6    0.19    0.22   0
  13   4   0   14.02    0.27   0
  13   5  -1   -0.08    0.18   0
  13   6  -2   28.48    0.37   0
  13   7  -3    6.61    0.29   0
  14   1   8   15.69    0.31   0
  14   2   5    0.35    0.22   0
  14   3   3   62.41    0.40   0
  14   5   0   29.16    0.34   0
  14   6  -1    3.77    0.30   0
  15   2   8    3.82    0.33   0
  15   3   5    0.65    0.28   0
  15   4   3    1.02    0.26   0
  15   5   2    4.69    0.28   0
 -15   2  14    1.22    0.28   0
 -15   6   7    0.77    0.21   0
 -14   0  18    2.85    0.28   0
 -14   1  14   53.05    0.42   0
 -14   2  11    6.27    0.25   0
 -14   3   9    0.22    0.23   0
 -13  -1  20   21.68    0.35   0
 -13   0  15   -0.00    0.25   0
 -13   2   9    1.04    0.21   0
 -13   3   7   45.01    0.35   0
 -13   7   3    8.96    0.27   0
 -12  -1  16    0.32    0.20   0
 -12   0  12   17.37    0.26   0
 -12   1   9    0.71    0.13   0
 -12   2   7   35.86    0.27   0
 -12   4   4   90.39    0.38   0
 -12   8   1    7.34    0.24   0
 -11  -2  19    2.18    0.21   0
 -11  -2  20    2.96    0.26   0
 -11   0  10   40.79    0.26   0
 -11   3   4    0.02    0.16   0
 -11   6   1  110.43    0.40   0
 -11   8   0    5.93    0.21   0
 -10  -2  16   67.48    0.32   0
 -10  -1  11    3.11    0.13   0
 -10   1   6    2.42    0.15   0
 -10   2   4   69.52    0.27   0
 -10   7  -1    1.34    0.15   0
  -9  -3  21    0.79    0.18   0
  -9  -3  22    2.44    0.20   0
  -9  -3  23    2.02    0.22   0
  -9   7  -2    7.92    0.16   0
  -8  -3  17   40.05    0.24   0
  -8  -1   8  301.02    0.46   0
  -8   7  -3    2.55    0.12   0
  -7  -2  10    2.64    0.12   0
  -6   6  -4    1.39    0.09   0
  -6  11  -5   29.33    0.18   0
  -5  -4  19   53.51    0.21   0
  -5  -4  20   66.49    0.25   0
  -5   5  -4   16.74    0.11   0
  -4  -4  17   21.08    0.14   0
  -4   1   0  123.80    0.19   0
  -1  -4  14   13.53    0.07   0
   5  -4  16    5.98    0.10   0
   5  -3   9   65.83    0.17   0
   6  -4  21   -0.06    0.11   0
   6  -3  10    6.31    0.09   0
   6   2  -3    0.47    0.10   0
   6   6  -7   38.37    0.18   0
   6   8  -8   20.27    0.18   0
   7  -3  11    1.71    0.11   0
   7   0   1    0.08    0.10   0
   7   1  -1   96.41    0.25   0
   7   3  -4    5.03    0.12   0
   7   9  -8   17.21    0.22   0
   7  10  -8    0.39    0.18   0
   7  11  -8   44.65    0.31   0
   8  -3  13    1.20    0.14   0
   8  -1   4  117.96    0.27   0
   8   7  -7   16.10    0.18   0
   9  -3  16    4.98    0.19   0
   9  -3  17    3.05    0.19   0
   9  -3  18    9.21    0.20   0
   9  -2   9    3.59    0.13   0
   9  -1   5    0.48    0.12   0
   9   4  -4  155.64    0.38   0
   9   5  -5    1.29    0.15   0
   9   6  -6   17.88    0.20   0
   9   9  -7    0.77    0.19   0
  10  -2  11    9.74    0.18   0
  10   1   1    0.76    0.15   0
  10   7  -6   26.15    0.28   0
  11  -2  15    9.78    0.23   0
  11  -1   8   81.47    0.33   0
  11   0   5    0.24    0.12   0
  11   1   2  132.03    0.38   0
  11   2   0  132.67    0.38   0
  11   7  -5    3.71    0.21   0
  11   9  -6    0.29    0.23   0
  12  -1  11    0.05    0.20   0
  12   5  -3    3.86    0.22   0
  13   0   9    0.09    0.21   0
  13   1   5    6.19    0.23   0
  13   2   3    0.18    0.15   0
  13   3   1    1.32    0.19   0
  13   8  -4   41.97    0.42   0
  14   1   7    5.03    0.25   0
  14   4   1   17.91    0.31   0
  14   7  -2    4.40    0.28   0
  15   2   7    0.16    0.28   0
  15   3   4    2.26    0.26   0
  15   5   1    0.01    0.27   0
 -15   3  12   -0.25    0.20   0
 -15   5   9    2.19    0.29   0
 -14   2  12    0.56    0.23   0
 -14   4   8   44.15    0.40   0
 -14   5   7   29.98    0.34   0
 -13   0  16   20.86    0.30   0
 -13   3   8  141.09    0.52   0
 -13   4   6  128.91    0.50   0
 -13   6   4   12.41    0.26   0
 -13   8   3    3.19    0.25   0
 -12  -1  17   11.23    0.22   0
 -12  -1  18    2.69    0.25   0
 -12   0  13    0.02    0.21   0
 -12   1  10    0.72    0.19   0
 -12   3   6   61.02    0.31   0
 -12   7   2    4.94    0.22   0
 -11  -2  21    0.07    0.22   0
 -11  -2  22   16.66    0.30   0
 -11  -1  14    4.98    0.16   0
 -11   1   8   26.13    0.22   0
 -11   2   6   39.89    0.24   0
 -11   4   3   12.32    0.20   0
 -11   9   0   11.09    0.23   0
 -10  -2  17   -0.05    0.18   0
 -10  -1  12  142.72    0.40   0
 -10   0   9    0.20    0.14   0
 -10   3   3   29.44    0.22   0
 -10   6   0   14.97    0.18   0
 -10   8  -1   14.68    0.21   0
  -9  -2  14   36.15    0.24   0
  -9  -1  10  435.92    0.61   0
  -9   0   7   -0.10    0.09   0
  -9   1   5   28.63    0.18   0
  -9   2   3   15.49    0.14   0
  -8  -3  18    9.36    0.18   0
  -8  -3  19    9.79    0.21   0
  -8   2   2  496.13    0.54   0
  -8   8  -3   15.58    0.18   0
  -7  -1   7   38.01    0.16   0
  -7   6  -3   27.75    0.16   0
  -7   8  -4   18.00    0.15   0
  -6  -1   6   87.74    0.22   0
  -6   2   0  132.18    0.23   0
  -6   9  -5   80.53    0.22   0
  -6  10  -5   47.40    0.20   0
  -5  -4  21   13.91    0.16   0
  -5  -4  22   16.36    0.20   0
  -5  -4  23   10.11    0.18   0
  -5  -4  24    0.10    0.17   0
  -5  -3  12    0.09    0.08   0
  -5  -2   8   63.65    0.18   0
  -5  -1   5   20.24    0.12   0
  -5   3  -2  402.89    0.36   0
  -5   4  -3    1.26    0.08   0
  -4  -4  18    8.55    0.13   0
  -4   0   2   13.39    0.08   0
  -3  -4  16   45.49    0.15   0
  -3  -3  10    0.02    0.07   0
  -2  -4  15    3.40    0.08   0
   1   1  -2  166.15    0.12   0
   3  -3   8   11.53    0.06   0
   3   4  -6    2.32    0.08   0
   3   7  -8   10.41    0.10   0
   4  -4  14    9.59    0.08   0
   4   4  -6  625.22    0.47   0
   4   7  -8   22.83    0.13   0
   5  -2   5  309.75    0.32   0
   5   0   0    4.90    0.07   0
   5   1  -2   98.87    0.20   0
   5   7  -8   84.10    0.25   0
   6  -4  18   26.68    0.19   0
   7  -1   3   39.36    0.17   0
   7   2  -3   88.13    0.24   0
   7   6  -7   11.33    0.15   0
   7   8  -8    2.92    0.16   0
   8  -2   7   45.05    0.19   0
   8   4  -5   83.13    0.27   0
   8   5  -6    7.59    0.14   0
   8  10  -8   17.74    0.25   0
   9  -3  15   14.25    0.20   0
   9   0   2    0.03    0.13   0
   9   1   0  324.09    0.48   0
   9   2  -2  336.68    0.49   0
   9   8  -7   10.92    0.21   0
  10  -2  10   23.21    0.20   0
  10  -1   6   18.59    0.19   0
  10   0   3    0.32    0.15   0
  10   2  -1    1.59    0.11   0
  10   4  -4  122.46    0.37   0
  10   9  -7    0.41    0.22   0
  11  -2  13    4.17    0.19   0
  11   0   4    6.18    0.18   0
  11   4  -3   12.40    0.20   0
  11   5  -4   -0.07    0.17   0
  11   8  -6   11.65    0.27   0
  12  -1  10   74.63    0.40   0
  12   0   6   32.18    0.25   0
  12   1   3    1.42    0.20   0
  12   2   1   16.13    0.19   0
  12   3  -1    1.19    0.19   0
  12   4  -2   27.64    0.24   0
  12   8  -5    2.75    0.22   0
  13   0   8   -0.21    0.20   0
  13   2   2   15.07    0.24   0
  13   4  -1    5.41    0.23   0
  13   5  -2    3.85    0.20   0
  13   6  -3    2.05    0.23   0
  13   7  -4    0.55    0.22   0
  14   0  10    9.73    0.26   0
  14   0  11    0.26    0.23   0
  14   2   4    9.43    0.25   0
  14   4   0   30.08    0.36   0
  14   5  -1   -0.05    0.25   0
  14   6  -2    6.19    0.32   0
  15   2   6    6.07    0.33   0
  15   4   2    2.75    0.23   0
 -15   2  16   23.46    0.40   0
 -15   3  13   15.36    0.30   0
 -15   4  11   -0.03    0.26   0
 -15   5  10    0.31    0.28   0
 -14   1  17    4.79    0.29   0
 -14   2  13    0.13    0.26   0
 -13   0  17   -0.15    0.26   0
 -13   2  10    5.56    0.18   0
 -13   4   7   18.18    0.27   0
 -13   7   4    0.52    0.24   0
 -12  -1  19    0.57    0.24   0
 -12  -1  20   32.22    0.35   0
 -12   0  14  115.23    0.43   0
 -12   2   8    1.17    0.13   0
 -12   5   4   22.50    0.27   0
 -12   6   3   23.31    0.26   0
 -12   8   2   27.29    0.33   0
 -11  -1  15   13.15    0.23   0
 -11   0  11    0.15    0.13   0
 -11   7   1    1.32    0.17   0
 -10  -2  18   52.03    0.32   0
 -10  -2  19    0.67    0.19   0
 -10   1   7   70.74    0.27   0
 -10   4   2   14.40    0.18   0
 -10   9  -1    3.53    0.17   0
 -10  10  -1    5.24    0.22   0
  -9  -2  15    2.65    0.17   0
  -9   3   2  506.82    0.61   0
  -9   6  -1    3.52    0.13   0
  -9   8  -2    0.36    0.14   0
  -9   9  -2   21.78    0.23   0
  -8  -3  20    0.48    0.17   0
  -8  -3  21    4.38    0.19   0
  -8  -2  13    2.18    0.13   0
  -8  -1   9   74.75    0.25   0
  -8   0   6    3.11    0.09   0
  -8   1   4  113.64    0.29   0
  -8   6  -2    6.87    0.12   0
  -8   9  -3   18.47    0.19   0
  -7  -3  16   40.86    0.21   0
  -7  -2  11   58.34    0.22   0
  -7   0   5   -0.06    0.10   0
  -7   1   3   30.02    0.15   0
  -7   9  -4   17.66    0.16   0
  -7  10  -4   11.63    0.15   0
  -7  11  -4   33.87    0.23   0
  -6  -3  14   20.76    0.15   0
  -6   3  -1   54.46    0.17   0
  -6   5  -3   46.39    0.16   0
  -5   0   3   -0.01    0.07   0
  -5   1   1   90.96    0.19   0
  -5   7  -5   96.58    0.20   0
  -4  -4  19   32.56    0.17   0
  -3  -4  17    2.55    0.10   0
  -3   5  -5    5.99    0.05   0
  -2  -1   3   11.58    0.06   0
  -2   8  -7    1.88    0.04   0
   2   4  -6   22.59    0.09   0
   2   7  -8  144.89    0.20   0
   3   3  -5    8.11    0.07   0
   4  -3   8    0.22    0.06   0
   4   3  -5  163.62    0.24   0
   4   5  -7   33.58    0.14   0
   5  -4  15   24.94    0.13   0
   5   3  -5  155.56    0.26   0
   5   4  -6  300.19    0.36   0
   6  -4  17    0.69    0.10   0
   6   0   0  112.38    0.23   0
   7  -3  10  130.84    0.28   0
   7  -2   6   36.68    0.16   0
   8   0   1    0.01    0.11   0
   8   3  -4   93.96    0.26   0
   8   9  -8    3.90    0.18   0
   9   7  -7    6.42    0.19   0
  10   3  -3   29.98    0.22   0
  10   5  -5   19.37    0.19   0
  10   6  -6    4.23    0.19   0
  10   8  -7   29.68    0.32   0
  11  -2  12   25.45    0.27   0
  11   1   1   71.84    0.30   0
  11   7  -6   14.27    0.24   0
  12  -1   9    9.79    0.23   0
  12   0   5    0.10    0.17   0
  12   7  -5    6.63    0.25   0
  13  -1  11    1.01    0.21   0
  13  -1  12    5.46    0.27   0
  13   0   7   -0.01    0.22   0
  13   1   4    1.01    0.20   0
  13   3   0    7.21    0.18   0
  13   5  -3    0.63    0.21   0
  14   0   9   -0.19    0.23   0
  14   1   6    6.73    0.21   0
  14   2   3   16.47    0.28   0
  14   3   1    2.10    0.24   0
  14   7  -3    0.06    0.21   0
  15   1   8    7.89    0.31   0
  15   2   5    7.93    0.32   0
  15   3   3    3.49    0.27   0
  15   4   1    1.34    0.26   0
  15   5   0    0.04    0.20   0
  15   6  -1    0.53    0.23   0
 -15   4  12    0.06    0.27   0
 -14   1  18   14.55    0.38   0
 -14   3  11    0.69    0.18   0
 -14   6   7   10.50    0.30   0
 -13   0  18    0.74    0.20   0
 -13   0  19   -0.26    0.26   0
 -13   6   5    0.24    0.23   0
 -13   8   4   54.49    0.45   0
 -12  -1  21    8.34    0.30   0
 -12   0  15   -0.06    0.23   0
 -12   1  11   32.52    0.26   0
 -12   3   7    0.06    0.19   0
 -12   9   2   18.30    0.28   0
 -11  -1  16   11.20    0.22   0
 -11  -1  17    1.41    0.20   0
 -11   0  12    9.39    0.21   0
 -11   1   9   76.73    0.33   0
 -11   3   5    9.51    0.16   0
 -11   4   4   29.79    0.23   0
 -11   8   1   32.49    0.30   0
 -10  -2  20   24.20    0.28   0
 -10  -2  21    2.29    0.21   0
 -10   0  10   66.20    0.28   0
 -10   7   0    0.70    0.15   0
  -9  -2  16  112.16    0.36   0
  -9  -1  11    0.91    0.15   0
  -9   0   8   16.31    0.17   0
  -9   2   4  328.70    0.49   0
  -9   4   1    0.15    0.12   0
  -9   5   0   58.14    0.24   0
  -9  10  -2    0.31    0.17   0
  -8  -3  22   37.70    0.27   0
  -8   3   1    2.57    0.09   0
  -8   4   0    3.19    0.12   0
  -8   5  -1    7.50    0.12   0
  -8  10  -3    1.31    0.15   0
  -7  -3  17    0.90    0.13   0
  -7  -1   8  106.60    0.26   0
  -7   3   0  297.14    0.39   0
  -7   4  -1   35.60    0.16   0
  -7   5  -2    4.02    0.10   0
  -6  -3  15    1.55    0.11   0
  -6   0   4   90.75    0.20   0
  -6   1   2    7.94    0.09   0
  -6   4  -2    3.07    0.09   0
  -4  -4  20   15.89    0.14   0
  -4  -4  21   16.18    0.15   0
  -4  -4  22   13.25    0.16   0
  -4  -4  23   21.77    0.19   0
  -4  -4  24   13.22    0.17   0
  -4   6  -5   52.18    0.13   0
   0  -4  14   17.27    0.06   0
   0   8  -8    0.32    0.03   0
   2   3  -5    4.68    0.05   0
   3  -4  13    0.47    0.04   0
   3   5  -7    2.61    0.07   0
   5   5  -7    4.27    0.09   0
   5  10  -9    0.15    0.13   0
   6  -3   9    1.83    0.08   0
   6  -2   5  176.13    0.27   0
   6   3  -5    2.51    0.10   0
   6   4  -6  226.47    0.35   0
   6   5  -7    1.97    0.11   0
   7   0   0  154.29    0.29   0
   8  -3  11    7.92    0.13   0
   8  -1   3   31.10    0.16   0
   8   2  -3   59.05    0.22   0
   8   8  -8   -0.04    0.15   0
   9  -3  13    0.69    0.13   0
   9  -1   4   37.66    0.20   0
   9   3  -4    0.93    0.14   0
   9   4  -5   21.43    0.20   0
   9   5  -6    2.39    0.15   0
   9   9  -8   27.69    0.30   0
   9  10  -8    0.22    0.19   0
  10  -3  16    9.68    0.23   0
  10  -3  17    0.01    0.19   0
  10  -2   9    1.58    0.14   0
  10  -1   5    0.17    0.14   0
  10   0   2   26.58    0.20   0
  10   1   0   36.25    0.20   0
  10   2  -2    0.37    0.14   0
  11  -2  11    2.59    0.17   0
  11   2  -1   68.65    0.28   0
  11   4  -4   31.74    0.24   0
  11   5  -5   45.83    0.28   0
  12  -2  15    0.08    0.22   0
  12  -1   8   78.94    0.38   0
  12   1   2  327.06    0.63   0
  12   2   0   64.28    0.30   0
  12   3  -2   29.45    0.24   0
  12   4  -3    0.42    0.18   0
  12   5  -4   20.71    0.27   0
  12   6  -5    0.71    0.22   0
  12   8  -6    5.76    0.27   0
  13  -1  10    3.89    0.22   0
  13   0   6   19.26    0.26   0
  13   1   3    2.99    0.21   0
  13   2   1    2.92    0.21   0
  13   3  -1    5.48    0.21   0
  13   4  -2   15.62    0.26   0
  13   6  -4    9.43    0.29   0
  13   8  -5    1.26    0.20   0
  14   0   8   -0.23    0.23   0
  14   1   5    2.24    0.25   0
  14   4  -1    2.69    0.24   0
  14   5  -2   30.72    0.40   0
  14   6  -3    1.92    0.29   0
  14   7  -4    4.44    0.27   0
  15   1   7    2.11    0.27   0
  15   2   4    8.16    0.32   0
  15   3   2   12.95    0.31   0
  15   5  -1    4.55    0.29   0
  15   6  -2    3.43    0.31   0
 -15   5  11    1.85    0.28   0
 -14   5   9    0.18    0.25   0
 -13   0  20    0.24    0.25   0
 -13   1  15   11.80    0.28   0
 -13   7   5    1.70    0.24   0
 -12   0  16    7.76    0.25   0
 -12   1  12   70.13    0.35   0
 -12   4   6    1.95    0.19   0
 -12   6   4   24.28    0.28   0
 -12   7   3    8.72    0.23   0
 -11  -1  18   28.00    0.29   0
 -11   0  13   -0.05    0.19   0
 -11   5   3    1.42    0.16   0
 -11   9   1    0.91    0.20   0
 -10  -2  22   45.29    0.36   0
 -10  -2  23    1.44    0.23   0
 -10  -1  14   34.58    0.24   0
 -10   3   4    1.49    0.16   0
  -9  -2  17   40.38    0.25   0
  -9  -1  12    1.03    0.16   0
  -9   1   6   29.79    0.19   0
  -9   7  -1   19.52    0.19   0
  -8  -2  14   42.91    0.23   0
  -8  -1  10   77.71    0.26   0
  -8   0   7   -0.18    0.12   0
  -8   2   3   60.95    0.21   0
  -8   7  -2   48.33    0.22   0
  -7  -3  18   18.05    0.18   0
  -7  -3  19    3.12    0.16   0
  -7  -2  12   22.32    0.16   0
  -7   7  -3   13.63    0.14   0
  -6  -1   7   17.93    0.13   0
  -6   7  -4   42.67    0.16   0
  -5  -2   9    4.42    0.09   0
  -4  -3  12   10.98    0.10   0
  -4   2  -1    1.56    0.06   0
  -4   9  -6   59.81    0.14   0
  -4  11  -6   29.52    0.13   0
  -3  -4  18   21.26    0.13   0
  -3   3  -3   41.68    0.10   0
  -2  -4  16   13.62    0.09   0
  -2  -2   6  148.60    0.16   0
  -2   0   1   -0.03    0.04   0
  -1  -4  15   42.58    0.11   0
  -1  -3   9   72.16    0.10   0
   2   5  -7   70.89    0.14   0
   3   2  -4  119.12    0.17   0
   3  10  -9    5.53    0.12   0
   3  11  -9   25.70    0.17   0
   4   2  -4  468.63    0.38   0
   4   9  -9    9.66    0.14   0
   4  11  -9    0.20    0.11   0
   5   2  -4  613.53    0.49   0
   5   9  -9    2.82    0.13   0
   5  11  -9    0.06    0.13   0
   6   9  -9    1.01    0.14   0
   6  10  -9    0.23    0.15   0
   6  11  -9    0.05    0.17   0
   7  -4  20   10.91    0.16   0
   7   1  -2    0.23    0.10   0
   7   3  -5    5.54    0.11   0
   7   4  -6   81.42    0.24   0
   7   5  -7    3.11    0.11   0
   8  -2   6  391.80    0.47   0
   8   7  -8   46.24    0.23   0
   9  -3  12    7.12    0.17   0
   9  -2   7    9.92    0.15   0
   9   0   1   -0.10    0.11   0
   9   6  -7   29.70    0.23   0
   9   8  -8   17.78    0.26   0
  10  -3  15   10.38    0.22   0
  10  -2   8    6.53    0.15   0
  10   4  -5   83.71    0.31   0
  11  -2  10   14.09    0.21   0
  11   3  -3    3.02    0.16   0
  11   6  -6   10.18    0.23   0
  11   8  -7   -0.01    0.22   0
  12  -2  13    3.21    0.21   0
  12  -1   7   -0.09    0.18   0
  12   0   4   43.59    0.28   0
  12   7  -6    3.39    0.24   0
  13  -1   9    3.42    0.23   0
  13   0   5    0.16    0.18   0
  13   7  -5    1.57    0.18   0
  14   0   7    0.09    0.23   0
  14   1   4   22.60    0.29   0
  14   2   2    0.79    0.17   0
  14   3   0    7.45    0.25   0
  15   1   6   13.17    0.33   0
  15   2   3    1.83    0.25   0
  15   3   1   19.12    0.34   0
  15   4   0    0.74    0.19   0
  16   2   5    0.80    0.28   0
  16   3   3    0.72    0.29   0
  16   4   1    0.61    0.25   0
 -14   2  16  105.62    0.57   0
 -14   3  13    0.37    0.26   0
 -13   1  16   49.91    0.39   0
 -13   2  13   12.05    0.28   0
 -13   3  10    6.46    0.18   0
 -13   8   5    1.95    0.25   0
 -12   0  17    0.08    0.22   0
 -12   2  10    1.61    0.19   0
 -12   3   8   13.38    0.23   0
 -12   5   5   22.41    0.23   0
 -12   8   3   13.78    0.28   0
 -12   9   3    0.64    0.24   0
 -11  -1  19   23.71    0.30   0
 -11  -1  20   66.34    0.45   0
 -11   0  14   12.09    0.22   0
 -11   1  10   10.28    0.16   0
 -11   2   8   16.24    0.20   0
 -11   3   6   42.73    0.27   0
 -10   0  11    0.00    0.16   0
 -10   1   8    0.19    0.10   0
 -10   2   6   25.16    0.20   0
 -10   4   3    0.91    0.16   0
 -10   5   2   74.30    0.30   0
 -10   8   0    0.60    0.16   0
 -10   9   0    5.38    0.19   0
  -9  -2  18    6.58    0.18   0
  -9  -2  19    2.17    0.17   0
  -9   0   9   -0.17    0.14   0
  -9   3   3    0.60    0.14   0
  -9   6   0   15.86    0.17   0
  -9   8  -1    0.99    0.17   0
  -8  -2  15   59.56    0.26   0
  -8   1   5   43.97    0.19   0
  -7  -3  20  107.29    0.35   0
  -7  -3  21    2.26    0.17   0
  -7  -3  22   93.15    0.38   0
  -7  -3  23    6.04    0.21   0
  -7  -3  24    6.20    0.22   0
  -7   0   6  216.25    0.35   0
  -7   2   2  365.70    0.43   0
  -6  -3  16    1.55    0.11   0
  -5  -3  14   19.42    0.13   0
  -5  -1   6  284.39    0.34   0
  -5   8  -5  121.08    0.24   0
  -4  -2   8  146.38    0.23   0
  -4  -1   5   12.54    0.09   0
  -4  10  -6   37.59    0.14   0
  -3  -4  19    7.27    0.11   0
  -3  -4  20   21.24    0.14   0
  -3  -3  11    2.10    0.07   0
  -3  -2   7  111.54    0.17   0
  -3  -1   4  251.62    0.23   0
  -3   4  -4   66.03    0.11   0
  -3   7  -6   32.84    0.09   0
  -2  -4  17    3.23    0.09   0
  -2  -3  10   26.07    0.09   0
   1   7  -8  306.65    0.22   0
   3  -2   4   15.08    0.07   0
   4  -4  13   66.80    0.14   0
   4  -2   4   71.77    0.14   0
   4   6  -8    4.35    0.08   0
   5   6  -8   32.35    0.15   0
   5   8  -9    0.55    0.11   0
   6  -4  15    4.66    0.10   0
   6   2  -4  193.80    0.29   0
   6   6  -8   21.03    0.14   0
   6   8  -9    2.32    0.14   0
   7  -4  18   23.18    0.18   0
   7  -3   9    0.86    0.08   0
   7  -2   5  179.33    0.30   0
   7   9  -9    0.79    0.14   0
   7  10  -9    2.30    0.17   0
   8  -3  10   54.05    0.20   0
   8   0   0   35.58    0.18   0
   8   1  -2    0.10    0.11   0
   8   3  -5    4.12    0.12   0
   8   4  -6    1.24    0.13   0
   8  10  -9    2.55    0.21   0
   9  -1   3   13.10    0.15   0
   9   7  -8    4.08    0.18   0
  10  -3  14   14.49    0.21   0
  10  -1   4   18.45    0.18   0
  10   5  -6   15.46    0.17   0
  10   6  -7   20.54    0.22   0
  10   8  -8   33.59    0.33   0
  10   9  -8   17.53    0.26   0
  11  -1   5   -0.08    0.16   0
  11   0   2   45.51    0.25   0
  11   1   0   28.75    0.20   0
  11   2  -2    0.67    0.15   0
  11   7  -7   42.18    0.30   0
  12  -2  11   18.44    0.27   0
  12  -2  12    8.10    0.22   0
  12   0   3    0.21    0.18   0
  12   1   1    4.52    0.16   0
  12   2  -1    3.01    0.16   0
  12   5  -5   24.88    0.26   0
  13  -1   8   27.75    0.30   0
  13   1   2    0.68    0.21   0
  13   2   0   34.46    0.30   0
  13   5  -4    3.12    0.18   0
  13   8  -6   26.10    0.38   0
  14  -1  11    7.51    0.28   0
  14   0   6   26.22    0.32   0
  14   2   1    3.68    0.21   0
  14   4  -2    4.24    0.25   0
  14   5  -3    8.74    0.23   0
  14   6  -4   32.78    0.46   0
  14   7  -5   18.31    0.33   0
  15   0   9   -0.28    0.25   0
  15   1   5    0.39    0.26   0
  15   4  -1    0.55    0.25   0
  15   5  -2   25.10    0.43   0
  15   6  -3    3.50    0.32   0
  16   3   2    7.04    0.29   0
 -14   2  17    1.10    0.22   0
 -14   2  18    5.69    0.32   0
 -14   5  10   22.98    0.35   0
 -14   6   9    0.53    0.28   0
 -13   1  17   27.15    0.31   0
 -13   1  18    0.27    0.27   0
 -13   2  14  112.50    0.55   0
 -13   3  11    5.01    0.23   0
 -13   4   9    6.81    0.23   0
 -13   5   8  186.40    0.61   0
 -12   0  18    4.85    0.24   0
 -12   0  19   -0.27    0.24   0
 -12   1  14    1.31    0.22   0
 -12   2  11    0.40    0.19   0
 -12   4   7   14.37    0.24   0
 -12   7   4    0.26    0.21   0
 -11  -1  21    8.92    0.26   0
 -11  -1  22   34.21    0.35   0
 -11   0  15   -0.40    0.19   0
 -11   4   5    0.40    0.16   0
 -11   5   4    0.20    0.17   0
 -11   6   3    8.43    0.20   0
 -11   8   2    7.49    0.21   0
 -10  -1  16    1.10    0.19   0
 -10   0  12   62.21    0.29   0
 -10   1   9   48.67    0.25   0
 -10   3   5   -0.00    0.15   0
 -10   7   1   21.81    0.21   0
 -10  10   0    0.62    0.19   0
  -9  -2  20   76.35    0.35   0
  -9  -2  21   13.13    0.24   0
  -9  -2  22    0.14    0.21   0
  -9  -1  13   16.58    0.20   0
  -9   1   7   12.12    0.16   0
  -9   4   2   97.52    0.29   0
  -9   5   1   89.84    0.28   0
  -9   9  -1    2.09    0.16   0
  -8  -2  16    0.21    0.15   0
  -8  -1  11  100.71    0.29   0
  -8   3   2  106.60    0.27   0
  -8   6  -1    1.73    0.11   0
  -8   8  -2   30.78    0.22   0
  -7  -2  13   62.35    0.23   0
  -7   1   4   75.72    0.22   0
  -7   8  -3   54.34    0.22   0
  -6  -3  17   21.50    0.16   0
  -6  -2  11   17.23    0.13   0
  -6   2   1   20.48    0.12   0
  -6   8  -4   19.44    0.14   0
  -5   2   0  389.91    0.35   0
  -5   6  -4   56.74    0.16   0
  -3  -4  21   10.22    0.13   0
  -3  -4  22   87.38    0.25   0
  -3  -4  23   18.64    0.16   0
  -3  -4  24  103.03    0.29   0
  -3   1   0  147.20    0.17   0
   1   4  -6   55.39    0.09   0
   2   2  -4  142.43    0.15   0
   2  10  -9   15.17    0.13   0
   2  11  -9    0.49    0.08   0
   3   6  -8   55.27    0.15   0
   4   0  -1   -0.12    0.06   0
   4   8  -9   12.17    0.12   0
   5  -2   4   48.78    0.14   0
   5   0  -1    0.14    0.07   0
   6  -4  14   16.72    0.13   0
   6  -3   8    0.86    0.08   0
   7   8  -9    2.29    0.14   0
   8  -2   5    1.84    0.10   0
   8   9  -9    1.13    0.16   0
   9  -3  11    6.77    0.14   0
   9  -2   6  145.97    0.33   0
   9   5  -7    7.29    0.15   0
   9  10  -9    1.37    0.21   0
  10  -3  13    1.90    0.15   0
  10  -2   7    2.53    0.15   0
  10   0   1    0.13    0.10   0
  10   2  -3   10.22    0.16   0
  11  -3  16    0.18    0.18   0
  11   3  -4    0.47    0.15   0
  11   4  -5    0.36    0.17   0
  11   5  -6   43.53    0.28   0
  11   9  -8    6.41    0.25   0
  12  -2  10   25.80    0.27   0
  12  -1   6   32.13    0.26   0
  12   3  -3   21.55    0.23   0
  12   6  -6   83.48    0.49   0
  12   8  -7    4.21    0.23   0
  13  -2  13    0.84    0.22   0
  13   0   4    9.11    0.23   0
  13   7  -6    2.62    0.24   0
  14  -1  10    0.59    0.24   0
  14   1   3   15.61    0.23   0
  14   3  -1    0.14    0.16   0
  15   0   8    3.48    0.27   0
  15   1   4   62.20    0.47   0
  15   2   2    0.77    0.26   0
  15   3   0   15.39    0.31   0
  16   2   4   40.05    0.42   0
  16   4   0    3.96    0.30   0
 -13   1  19   12.79    0.31   0
 -13   1  20   21.48    0.40   0
[truncated: 265,352 more chars]
