# Supplementary material
Source: MDPI journal article supplement (https://www.mdpi.com/2304-6740/6/3/67)
Supplement: s1 [file s1 › sv0468.cif]

data_sv0468
 
_audit_creation_method            'SHELXL-2017/1'
_shelx_SHELXL_version_number      '2017/1'
_chemical_name_systematic         ?
_chemical_name_common             ?
_chemical_melting_point           ?
_chemical_formula_moiety          'C24 H42 Fe Li N2 P3, 0.5(C6 H14)'
_chemical_formula_sum             'C27 H49 Fe Li N2 P3' 
_chemical_formula_weight          557.38

loop_
 _atom_type_symbol
 _atom_type_description
 _atom_type_scat_dispersion_real
 _atom_type_scat_dispersion_imag
 _atom_type_scat_source
 'C'  'C'   0.0181   0.0091
 'International Tables Vol C Tables 4.2.6.8 and 6.1.1.4'
 'H'  'H'   0.0000   0.0000
 'International Tables Vol C Tables 4.2.6.8 and 6.1.1.4'
 'Fe'  'Fe'  -1.1336   3.1974
 'International Tables Vol C Tables 4.2.6.8 and 6.1.1.4'
 'Li'  'Li'   0.0008   0.0003
 'International Tables Vol C Tables 4.2.6.8 and 6.1.1.4'
 'N'  'N'   0.0311   0.0180
 'International Tables Vol C Tables 4.2.6.8 and 6.1.1.4'
 'P'  'P'   0.2955   0.4335
 'International Tables Vol C Tables 4.2.6.8 and 6.1.1.4'
 
_space_group_crystal_system       monoclinic
_space_group_IT_number            15
_space_group_name_H-M_alt         'C 2/c'
_space_group_name_Hall            '-C 2yc'
 
_shelx_space_group_comment
;
The symmetry employed for this shelxl refinement is uniquely defined
by the following loop, which should always be used as a source of
symmetry information in preference to the above space-group names.
They are only intended as comments.
;
 
loop_
 _space_group_symop_operation_xyz
 'x, y, z'
 '-x, y, -z+1/2'
 'x+1/2, y+1/2, z'
 '-x+1/2, y+1/2, -z+1/2'
 '-x, -y, -z'
 'x, -y, z-1/2'
 '-x+1/2, -y+1/2, -z'
 'x+1/2, -y+1/2, z-1/2'
 
_cell_length_a                    10.2172(3)
_cell_length_b                    17.3386(6)
_cell_length_c                    34.6955(9)
_cell_angle_alpha                 90
_cell_angle_beta                  90.735(2)
_cell_angle_gamma                 90
_cell_volume                      6145.9(3)
_cell_formula_units_Z             8
_cell_measurement_temperature     100(2)
_cell_measurement_reflns_used    13096
_cell_measurement_theta_min      5.10
_cell_measurement_theta_max      71.07
 
_exptl_crystal_description       'plate'
_exptl_crystal_colour            'orange'
_exptl_crystal_density_meas       ?
_exptl_crystal_density_method     ?
_exptl_crystal_density_diffrn     1.205          
_exptl_crystal_F_000              2392
_exptl_transmission_factor_min    ?
_exptl_transmission_factor_max    ?
_exptl_crystal_size_max           0.179
_exptl_crystal_size_mid           0.152
_exptl_crystal_size_min           0.033
_exptl_absorpt_coefficient_mu     5.526
_shelx_estimated_absorpt_T_min    0.438
_shelx_estimated_absorpt_T_max    0.839
_exptl_absorpt_correction_type   integration
_exptl_absorpt_process_details
;
STOE X-Red32, absorption correction by Gaussian integration, analogous to
P. Coppens, "The Evaluation of Absorption and Extinction in Single-Crystal
Structure Analysis", published in
F. R. Ahmed (Editor), "Crystallographic Computing",
Munksgaard, Copenhagen (1970), 255 - 270
;
_exptl_absorpt_correction_T_min  0.5392
_exptl_absorpt_correction_T_max  0.8344
_exptl_absorpt_special_details    ?
_diffrn_ambient_temperature       100(2)
_diffrn_measurement_device       '4-circle diffractometer'
_diffrn_measurement_device_type  'STOE STADI VARI'

_diffrn_detector                 'imaging plate area detector'
_diffrn_detector_type            'STOE Imaging Plate'
_diffrn_detector_area_resol_mean 5.81

_diffrn_source                   'sealed x-ray tube'
_diffrn_source_type              'Genix Cu 3D HF'
_diffrn_radiation_probe          x-ray
_diffrn_source_target            Cu
_diffrn_source_voltage           50
_diffrn_source_current           0.600
_diffrn_source_power             0.030
_diffrn_radiation_type           'Cu K\a'
_diffrn_radiation_wavelength     1.54186
_diffrn_radiation_monochromator  'Graded multilayer mirror'
_diffrn_radiation_polarisn_norm  0
_diffrn_radiation_collimation    '1.2 mm, 0.6 diameter'

_diffrn_measurement_method       'rotation method, \w scans'
_diffrn_measurement_details
; 1451 frames, detector distance = 70 mm
;

_diffrn_reflns_number             11002
_diffrn_reflns_av_unetI/netI      0.0262
_diffrn_reflns_av_R_equivalents   0.0240
_diffrn_reflns_limit_h_min        -12
_diffrn_reflns_limit_h_max        5
_diffrn_reflns_limit_k_min        -18
_diffrn_reflns_limit_k_max        20
_diffrn_reflns_limit_l_min        -41
_diffrn_reflns_limit_l_max        41
_diffrn_reflns_theta_min          5.100
_diffrn_reflns_theta_max          68.990
_diffrn_reflns_theta_full         67.686
_diffrn_measured_fraction_theta_max   0.934
_diffrn_measured_fraction_theta_full  0.942
_diffrn_reflns_Laue_measured_fraction_max    0.934
_diffrn_reflns_Laue_measured_fraction_full   0.942
_diffrn_reflns_point_group_measured_fraction_max   0.934
_diffrn_reflns_point_group_measured_fraction_full  0.942
_reflns_number_total              5340
_reflns_number_gt                 4654
_reflns_threshold_expression      'I > 2\s(I)'
_reflns_Friedel_coverage          0.000
_reflns_Friedel_fraction_max      .
_reflns_Friedel_fraction_full     .
 
_reflns_special_details
;
 Reflections were merged by SHELXL according to the crystal
 class for the calculation of statistics and refinement.
 
 _reflns_Friedel_fraction is defined as the number of unique
 Friedel pairs measured divided by the number that would be
 possible theoretically, ignoring centric projections and
 systematic absences.
;
 
_computing_data_collection        ?
_computing_cell_refinement        ?
_computing_data_reduction         ?
_computing_structure_solution     ?
_computing_structure_refinement 'SHELXL-2017/1 (Sheldrick, 2017)'
_computing_molecular_graphics     ?
_computing_publication_material   ?
_refine_special_details           ?
_refine_ls_structure_factor_coef  Fsqd
_refine_ls_matrix_type            full
_refine_ls_weighting_scheme       calc
_refine_ls_weighting_details
'w=1/[\s^2^(Fo^2^)+(0.0337P)^2^+8.4976P] where P=(Fo^2^+2Fc^2^)/3'
_atom_sites_solution_primary      ?
_atom_sites_solution_secondary    ?
_atom_sites_solution_hydrogens    geom
_refine_ls_hydrogen_treatment     constr
_refine_ls_extinction_method      none
_refine_ls_extinction_coef        .
_refine_ls_number_reflns          5340
_refine_ls_number_parameters      318
_refine_ls_number_restraints      0
_refine_ls_R_factor_all           0.0393
_refine_ls_R_factor_gt            0.0309
_refine_ls_wR_factor_ref          0.0733
_refine_ls_wR_factor_gt           0.0693
_refine_ls_goodness_of_fit_ref    1.021
_refine_ls_restrained_S_all       1.021
_refine_ls_shift/su_max           0.002
_refine_ls_shift/su_mean          0.000
 
loop_
 _atom_site_label
 _atom_site_type_symbol
 _atom_site_fract_x
 _atom_site_fract_y
 _atom_site_fract_z
 _atom_site_U_iso_or_equiv
 _atom_site_adp_type
 _atom_site_occupancy
 _atom_site_site_symmetry_order  
 _atom_site_calc_flag
 _atom_site_refinement_flags_posn
 _atom_site_refinement_flags_adp
 _atom_site_refinement_flags_occupancy
 _atom_site_disorder_assembly
 _atom_site_disorder_group
C1 C 0.22274(19) 0.36642(11) 0.63423(5) 0.0150(4) Uani 1 1 d . . . . .
C2 C 0.3256(2) 0.31808(11) 0.64897(6) 0.0187(4) Uani 1 1 d . . . . .
H2A H 0.415347 0.321673 0.642362 0.022 Uiso 1 1 calc R U . . .
C3 C 0.2715(2) 0.26386(11) 0.67507(6) 0.0207(4) Uani 1 1 d . . . . .
H3A H 0.318567 0.225165 0.688816 0.025 Uiso 1 1 calc R U . . .
C4 C 0.1344(2) 0.27785(11) 0.67696(6) 0.0202(4) Uani 1 1 d . . . . .
H4A H 0.073776 0.249998 0.692132 0.024 Uiso 1 1 calc R U . . .
C5 C 0.1043(2) 0.34081(11) 0.65216(5) 0.0182(4) Uani 1 1 d . . . . .
H5A H 0.019794 0.362415 0.648097 0.022 Uiso 1 1 calc R U . . .
C6 C 0.25946(18) 0.48951(11) 0.70560(5) 0.0154(4) Uani 1 1 d . . . . .
C7 C 0.36558(19) 0.44504(11) 0.72097(5) 0.0169(4) Uani 1 1 d . . . . .
H7A H 0.455189 0.451625 0.714773 0.020 Uiso 1 1 calc R U . . .
C8 C 0.3157(2) 0.38932(11) 0.74703(5) 0.0191(4) Uani 1 1 d . . . . .
H8A H 0.365665 0.352505 0.761182 0.023 Uiso 1 1 calc R U . . .
C9 C 0.1777(2) 0.39868(12) 0.74808(5) 0.0191(4) Uani 1 1 d . . . . .
H9A H 0.119162 0.369324 0.763255 0.023 Uiso 1 1 calc R U . . .
C10 C 0.1423(2) 0.45963(11) 0.72249(5) 0.0183(4) Uani 1 1 d . . . . .
H10A H 0.055817 0.477483 0.717450 0.022 Uiso 1 1 calc R U . . .
C11 C 0.1639(2) 0.41880(11) 0.55681(5) 0.0189(4) Uani 1 1 d . . . . .
C12 C 0.0167(2) 0.40514(13) 0.56184(6) 0.0241(5) Uani 1 1 d . . . . .
H12A H 0.003347 0.363373 0.580415 0.029 Uiso 1 1 calc R U . . .
H12B H -0.022987 0.390900 0.536977 0.029 Uiso 1 1 calc R U . . .
H12C H -0.024377 0.452429 0.571351 0.029 Uiso 1 1 calc R U . . .
C13 C 0.2298(2) 0.34477(12) 0.54299(6) 0.0248(5) Uani 1 1 d . . . . .
H13A H 0.189812 0.328520 0.518474 0.030 Uiso 1 1 calc R U . . .
H13B H 0.218312 0.304083 0.562261 0.030 Uiso 1 1 calc R U . . .
H13C H 0.323353 0.354254 0.539372 0.030 Uiso 1 1 calc R U . . .
C14 C 0.1818(2) 0.48207(13) 0.52664(6) 0.0273(5) Uani 1 1 d . . . . .
H14C H 0.275322 0.488934 0.521667 0.033 Uiso 1 1 calc R U . . .
H14B H 0.145164 0.530546 0.536216 0.033 Uiso 1 1 calc R U . . .
H14A H 0.136540 0.467292 0.502689 0.033 Uiso 1 1 calc R U . . .
C15 C 0.2338(2) 0.65385(11) 0.69249(6) 0.0192(4) Uani 1 1 d . . . . .
C16 C 0.3197(2) 0.66153(12) 0.72865(6) 0.0289(5) Uani 1 1 d . . . . .
H16A H 0.295988 0.621413 0.747195 0.035 Uiso 1 1 calc R U . . .
H16B H 0.306281 0.712438 0.740226 0.035 Uiso 1 1 calc R U . . .
H16C H 0.411847 0.655676 0.721739 0.035 Uiso 1 1 calc R U . . .
C17 C 0.0894(2) 0.65693(14) 0.70303(8) 0.0334(6) Uani 1 1 d . . . . .
H17A H 0.069944 0.706875 0.714875 0.040 Uiso 1 1 calc R U . . .
H17B H 0.070029 0.615474 0.721295 0.040 Uiso 1 1 calc R U . . .
H17C H 0.035447 0.650404 0.679702 0.040 Uiso 1 1 calc R U . . .
C18 C 0.2643(2) 0.72018(12) 0.66496(6) 0.0253(5) Uani 1 1 d . . . . .
H18A H 0.356826 0.718159 0.657920 0.030 Uiso 1 1 calc R U . . .
H18B H 0.245994 0.769445 0.677641 0.030 Uiso 1 1 calc R U . . .
H18C H 0.209604 0.715436 0.641667 0.030 Uiso 1 1 calc R U . . .
C19 C 0.7337(2) 0.53574(15) 0.60408(7) 0.0316(5) Uani 1 1 d . . . . .
H19A H 0.729853 0.498958 0.582270 0.038 Uiso 1 1 calc R U . . .
H19B H 0.826565 0.541699 0.612031 0.038 Uiso 1 1 calc R U . . .
C20 C 0.6805(2) 0.61268(14) 0.59111(7) 0.0295(5) Uani 1 1 d . . . . .
H20A H 0.692350 0.650838 0.612095 0.035 Uiso 1 1 calc R U . . .
H20B H 0.730193 0.630897 0.568553 0.035 Uiso 1 1 calc R U . . .
C21 C 0.6899(2) 0.42244(14) 0.64182(8) 0.0353(6) Uani 1 1 d . . . . .
H21A H 0.783870 0.416844 0.647114 0.042 Uiso 1 1 calc R U . . .
H21B H 0.666644 0.394189 0.618248 0.042 Uiso 1 1 calc R U . . .
H21C H 0.640445 0.401575 0.663475 0.042 Uiso 1 1 calc R U . . .
C22 C 0.6919(2) 0.54529(13) 0.67269(7) 0.0298(5) Uani 1 1 d . . . . .
H22A H 0.666098 0.599541 0.670350 0.036 Uiso 1 1 calc R U . . .
H22B H 0.786563 0.542031 0.677384 0.036 Uiso 1 1 calc R U . . .
H22C H 0.645681 0.521608 0.694244 0.036 Uiso 1 1 calc R U . . .
C23 C 0.5214(3) 0.57175(15) 0.54271(6) 0.0361(6) Uani 1 1 d . . . . .
H23A H 0.554402 0.518686 0.543334 0.043 Uiso 1 1 calc R U . . .
H23B H 0.569270 0.601412 0.523409 0.043 Uiso 1 1 calc R U . . .
H23C H 0.427977 0.571421 0.535988 0.043 Uiso 1 1 calc R U . . .
C24 C 0.4825(3) 0.68465(14) 0.57953(7) 0.0355(6) Uani 1 1 d . . . . .
H24A H 0.520334 0.714031 0.558275 0.043 Uiso 1 1 calc R U . . .
H24B H 0.500864 0.711169 0.603946 0.043 Uiso 1 1 calc R U . . .
H24C H 0.387578 0.680457 0.575603 0.043 Uiso 1 1 calc R U . . .
C25 C 0.5244(3) 0.22727(18) 0.56175(9) 0.0550(8) Uani 1 1 d . . . . .
H25A H 0.557740 0.178015 0.571641 0.066 Uiso 1 1 calc R U . . .
H25B H 0.455805 0.217565 0.542343 0.066 Uiso 1 1 calc R U . . .
H25C H 0.487942 0.257300 0.583007 0.066 Uiso 1 1 calc R U . . .
C26 C 0.6356(3) 0.27223(16) 0.54352(8) 0.0433(7) Uani 1 1 d . . . . .
H26A H 0.602357 0.322880 0.534586 0.052 Uiso 1 1 calc R U . . .
H26B H 0.704805 0.281733 0.563190 0.052 Uiso 1 1 calc R U . . .
C27 C 0.6942(2) 0.22936(14) 0.50967(7) 0.0348(6) Uani 1 1 d . . . . .
H27B H 0.725991 0.178524 0.518823 0.042 Uiso 1 1 calc R U . . .
H27A H 0.624241 0.219896 0.490254 0.042 Uiso 1 1 calc R U . . .
Fe01 Fe 0.23530(3) 0.37435(2) 0.69321(2) 0.01355(9) Uani 1 1 d . . . . .
Li1 Li 0.4631(3) 0.5310(2) 0.62072(9) 0.0199(7) Uani 1 1 d . . . . .
N1 N 0.65811(17) 0.50430(10) 0.63678(5) 0.0229(4) Uani 1 1 d . . . . .
N2 N 0.54030(17) 0.60722(10) 0.58067(5) 0.0217(4) Uani 1 1 d . . . . .
P1 P 0.24921(5) 0.45024(3) 0.60291(2) 0.01515(11) Uani 1 1 d . . . . .
P2 P 0.12593(5) 0.54158(3) 0.62512(2) 0.01760(12) Uani 1 1 d . . . . .
P3 P 0.27989(5) 0.56144(3) 0.66750(2) 0.01389(11) Uani 1 1 d . . . . .
 
loop_
 _atom_site_aniso_label
 _atom_site_aniso_U_11
 _atom_site_aniso_U_22
 _atom_site_aniso_U_33
 _atom_site_aniso_U_23
 _atom_site_aniso_U_13
 _atom_site_aniso_U_12
C1 0.0165(10) 0.0145(9) 0.0140(9) -0.0024(7) -0.0013(7) -0.0015(8)
C2 0.0164(10) 0.0198(10) 0.0199(10) -0.0034(8) -0.0015(8) 0.0026(8)
C3 0.0261(11) 0.0130(9) 0.0228(10) -0.0019(8) -0.0037(8) 0.0003(9)
C4 0.0206(11) 0.0167(10) 0.0232(10) -0.0017(8) -0.0018(8) -0.0094(9)
C5 0.0150(10) 0.0198(10) 0.0198(10) -0.0006(8) -0.0044(8) -0.0043(8)
C6 0.0159(10) 0.0142(9) 0.0160(9) -0.0028(7) 0.0009(7) -0.0011(8)
C7 0.0144(10) 0.0188(10) 0.0175(9) -0.0026(7) -0.0031(7) -0.0036(8)
C8 0.0216(11) 0.0184(10) 0.0171(9) -0.0001(8) -0.0049(8) -0.0009(8)
C9 0.0218(11) 0.0194(10) 0.0161(9) 0.0009(8) 0.0032(8) -0.0031(9)
C10 0.0170(10) 0.0184(10) 0.0195(10) -0.0025(8) 0.0036(8) 0.0011(8)
C11 0.0198(11) 0.0196(10) 0.0173(9) -0.0008(8) -0.0047(8) -0.0014(8)
C12 0.0201(11) 0.0265(11) 0.0253(11) -0.0031(9) -0.0073(8) -0.0017(9)
C13 0.0273(12) 0.0260(11) 0.0211(10) -0.0044(8) -0.0018(9) -0.0003(9)
C14 0.0344(13) 0.0277(11) 0.0196(10) 0.0035(9) -0.0073(9) -0.0041(10)
C15 0.0199(11) 0.0151(9) 0.0225(10) -0.0025(8) 0.0021(8) 0.0008(8)
C16 0.0447(14) 0.0186(11) 0.0231(11) -0.0036(8) -0.0049(10) 0.0013(10)
C17 0.0285(13) 0.0245(12) 0.0476(14) -0.0108(10) 0.0128(11) 0.0028(10)
C18 0.0328(13) 0.0161(10) 0.0269(11) 0.0002(8) -0.0020(9) 0.0009(9)
C19 0.0139(11) 0.0435(14) 0.0374(13) 0.0036(11) 0.0058(9) -0.0004(10)
C20 0.0188(11) 0.0380(13) 0.0317(12) 0.0073(10) 0.0007(9) -0.0075(10)
C21 0.0311(14) 0.0268(12) 0.0480(15) 0.0006(11) -0.0024(11) 0.0092(11)
C22 0.0248(12) 0.0294(12) 0.0353(13) 0.0014(10) -0.0051(9) -0.0040(10)
C23 0.0386(14) 0.0445(15) 0.0254(12) -0.0029(10) 0.0022(10) -0.0115(12)
C24 0.0402(15) 0.0297(13) 0.0365(13) 0.0078(10) -0.0016(11) 0.0004(11)
C25 0.060(2) 0.0587(19) 0.0463(16) 0.0092(14) 0.0003(14) 0.0245(16)
C26 0.0484(17) 0.0410(15) 0.0403(14) -0.0037(12) -0.0119(12) 0.0131(13)
C27 0.0397(14) 0.0290(13) 0.0352(13) -0.0039(10) -0.0162(11) 0.0044(11)
Fe01 0.01153(16) 0.01350(15) 0.01557(15) 0.00041(11) -0.00110(11) -0.00128(12)
Li1 0.0162(17) 0.0220(17) 0.0217(17) 0.0017(14) 0.0018(13) -0.0004(14)
N1 0.0155(9) 0.0238(9) 0.0296(10) 0.0024(7) 0.0013(7) 0.0028(7)
N2 0.0182(9) 0.0257(9) 0.0210(9) 0.0028(7) -0.0009(7) -0.0040(8)
P1 0.0135(2) 0.0162(2) 0.0157(2) 0.00036(18) -0.00170(17) -0.0011(2)
P2 0.0145(3) 0.0171(2) 0.0211(2) -0.00036(19) -0.00387(18) 0.0018(2)
P3 0.0121(2) 0.0136(2) 0.0160(2) -0.00026(18) 0.00018(17) -0.00062(19)
 
_geom_special_details
;
 All esds (except the esd in the dihedral angle between two l.s. planes)
 are estimated using the full covariance matrix.  The cell esds are taken
 into account individually in the estimation of esds in distances, angles
 and torsion angles; correlations between esds in cell parameters are only
 used when they are defined by crystal symmetry.  An approximate (isotropic)
 treatment of cell esds is used for estimating esds involving l.s. planes.
;
 
loop_
 _geom_bond_atom_site_label_1
 _geom_bond_atom_site_label_2
 _geom_bond_distance
 _geom_bond_site_symmetry_2
 _geom_bond_publ_flag
C1 C2 1.433(3) . ?
C1 C5 1.438(3) . ?
C1 P1 1.8369(19) . ?
C1 Fe01 2.0534(18) . ?
C2 C3 1.422(3) . ?
C2 Fe01 2.049(2) . ?
C2 H2A 0.9500 . ?
C3 C4 1.424(3) . ?
C3 Fe01 2.052(2) . ?
C3 H3A 0.9500 . ?
C4 C5 1.421(3) . ?
C4 Fe01 2.0409(19) . ?
C4 H4A 0.9500 . ?
C5 Fe01 2.0273(19) . ?
C5 H5A 0.9500 . ?
C6 C7 1.428(3) . ?
C6 C10 1.437(3) . ?
C6 P3 1.8314(19) . ?
C6 Fe01 2.0567(19) . ?
C7 C8 1.422(3) . ?
C7 Fe01 2.0417(19) . ?
C7 H7A 0.9500 . ?
C8 C9 1.420(3) . ?
C8 Fe01 2.0469(19) . ?
C8 H8A 0.9500 . ?
C9 C10 1.424(3) . ?
C9 Fe01 2.0437(19) . ?
C9 H9A 0.9500 . ?
C10 Fe01 2.0363(19) . ?
C10 H10A 0.9500 . ?
C11 C14 1.529(3) . ?
C11 C13 1.529(3) . ?
C11 C12 1.535(3) . ?
C11 P1 1.8919(19) . ?
C12 H12A 0.9800 . ?
C12 H12B 0.9800 . ?
C12 H12C 0.9800 . ?
C13 H13A 0.9800 . ?
C13 H13B 0.9800 . ?
C13 H13C 0.9800 . ?
C14 H14C 0.9800 . ?
C14 H14B 0.9800 . ?
C14 H14A 0.9800 . ?
C15 C17 1.526(3) . ?
C15 C16 1.527(3) . ?
C15 C18 1.530(3) . ?
C15 P3 1.884(2) . ?
C16 H16A 0.9800 . ?
C16 H16B 0.9800 . ?
C16 H16C 0.9800 . ?
C17 H17A 0.9800 . ?
C17 H17B 0.9800 . ?
C17 H17C 0.9800 . ?
C18 H18A 0.9800 . ?
C18 H18B 0.9800 . ?
C18 H18C 0.9800 . ?
C19 N1 1.484(3) . ?
C19 C20 1.507(3) . ?
C19 H19A 0.9900 . ?
C19 H19B 0.9900 . ?
C20 N2 1.476(3) . ?
C20 H20A 0.9900 . ?
C20 H20B 0.9900 . ?
C21 N1 1.466(3) . ?
C21 H21A 0.9800 . ?
C21 H21B 0.9800 . ?
C21 H21C 0.9800 . ?
C22 N1 1.472(3) . ?
C22 H22A 0.9800 . ?
C22 H22B 0.9800 . ?
C22 H22C 0.9800 . ?
C23 N2 1.464(3) . ?
C23 H23A 0.9800 . ?
C23 H23B 0.9800 . ?
C23 H23C 0.9800 . ?
C24 N2 1.467(3) . ?
C24 H24A 0.9800 . ?
C24 H24B 0.9800 . ?
C24 H24C 0.9800 . ?
C25 C26 1.523(4) . ?
C25 H25A 0.9800 . ?
C25 H25B 0.9800 . ?
C25 H25C 0.9800 . ?
C26 C27 1.519(3) . ?
C26 H26A 0.9900 . ?
C26 H26B 0.9900 . ?
C27 C27 1.510(5) 7_656 ?
C27 H27B 0.9900 . ?
C27 H27A 0.9900 . ?
Li1 N2 2.081(4) . ?
Li1 N1 2.113(4) . ?
Li1 P3 2.548(3) . ?
Li1 P1 2.661(3) . ?
P1 P2 2.1710(7) . ?
P2 P3 2.1669(7) . ?
 
loop_
 _geom_angle_atom_site_label_1
 _geom_angle_atom_site_label_2
 _geom_angle_atom_site_label_3
 _geom_angle
 _geom_angle_site_symmetry_1
 _geom_angle_site_symmetry_3
 _geom_angle_publ_flag
C2 C1 C5 106.40(17) . . ?
C2 C1 P1 124.12(15) . . ?
C5 C1 P1 129.15(15) . . ?
C2 C1 Fe01 69.36(11) . . ?
C5 C1 Fe01 68.39(10) . . ?
P1 C1 Fe01 121.93(9) . . ?
C3 C2 C1 108.95(18) . . ?
C3 C2 Fe01 69.83(11) . . ?
C1 C2 Fe01 69.73(11) . . ?
C3 C2 H2A 125.5 . . ?
C1 C2 H2A 125.5 . . ?
Fe01 C2 H2A 126.5 . . ?
C2 C3 C4 107.89(18) . . ?
C2 C3 Fe01 69.59(11) . . ?
C4 C3 Fe01 69.23(11) . . ?
C2 C3 H3A 126.1 . . ?
C4 C3 H3A 126.1 . . ?
Fe01 C3 H3A 126.7 . . ?
C5 C4 C3 107.97(18) . . ?
C5 C4 Fe01 69.04(11) . . ?
C3 C4 Fe01 70.05(11) . . ?
C5 C4 H4A 126.0 . . ?
C3 C4 H4A 126.0 . . ?
Fe01 C4 H4A 126.5 . . ?
C4 C5 C1 108.79(18) . . ?
C4 C5 Fe01 70.07(11) . . ?
C1 C5 Fe01 70.34(11) . . ?
C4 C5 H5A 125.6 . . ?
C1 C5 H5A 125.6 . . ?
Fe01 C5 H5A 125.6 . . ?
C7 C6 C10 106.61(17) . . ?
C7 C6 P3 122.97(14) . . ?
C10 C6 P3 130.04(15) . . ?
C7 C6 Fe01 69.04(11) . . ?
C10 C6 Fe01 68.69(11) . . ?
P3 C6 Fe01 121.65(9) . . ?
C8 C7 C6 109.13(17) . . ?
C8 C7 Fe01 69.84(11) . . ?
C6 C7 Fe01 70.17(11) . . ?
C8 C7 H7A 125.4 . . ?
C6 C7 H7A 125.4 . . ?
Fe01 C7 H7A 126.1 . . ?
C9 C8 C7 107.61(17) . . ?
C9 C8 Fe01 69.57(11) . . ?
C7 C8 Fe01 69.45(11) . . ?
C9 C8 H8A 126.2 . . ?
C7 C8 H8A 126.2 . . ?
Fe01 C8 H8A 126.4 . . ?
C8 C9 C10 108.28(17) . . ?
C8 C9 Fe01 69.81(11) . . ?
C10 C9 Fe01 69.29(11) . . ?
C8 C9 H9A 125.9 . . ?
C10 C9 H9A 125.9 . . ?
Fe01 C9 H9A 126.6 . . ?
C9 C10 C6 108.36(17) . . ?
C9 C10 Fe01 69.85(11) . . ?
C6 C10 Fe01 70.21(11) . . ?
C9 C10 H10A 125.8 . . ?
C6 C10 H10A 125.8 . . ?
Fe01 C10 H10A 125.7 . . ?
C14 C11 C13 109.29(17) . . ?
C14 C11 C12 108.36(17) . . ?
C13 C11 C12 110.00(17) . . ?
C14 C11 P1 108.30(14) . . ?
C13 C11 P1 107.88(13) . . ?
C12 C11 P1 112.95(14) . . ?
C11 C12 H12A 109.5 . . ?
C11 C12 H12B 109.5 . . ?
H12A C12 H12B 109.5 . . ?
C11 C12 H12C 109.5 . . ?
H12A C12 H12C 109.5 . . ?
H12B C12 H12C 109.5 . . ?
C11 C13 H13A 109.5 . . ?
C11 C13 H13B 109.5 . . ?
H13A C13 H13B 109.5 . . ?
C11 C13 H13C 109.5 . . ?
H13A C13 H13C 109.5 . . ?
H13B C13 H13C 109.5 . . ?
C11 C14 H14C 109.5 . . ?
C11 C14 H14B 109.5 . . ?
H14C C14 H14B 109.5 . . ?
C11 C14 H14A 109.5 . . ?
H14C C14 H14A 109.5 . . ?
H14B C14 H14A 109.5 . . ?
C17 C15 C16 110.30(18) . . ?
C17 C15 C18 109.19(18) . . ?
C16 C15 C18 109.16(17) . . ?
C17 C15 P3 112.83(14) . . ?
C16 C15 P3 107.94(14) . . ?
C18 C15 P3 107.34(13) . . ?
C15 C16 H16A 109.5 . . ?
C15 C16 H16B 109.5 . . ?
H16A C16 H16B 109.5 . . ?
C15 C16 H16C 109.5 . . ?
H16A C16 H16C 109.5 . . ?
H16B C16 H16C 109.5 . . ?
C15 C17 H17A 109.5 . . ?
C15 C17 H17B 109.5 . . ?
H17A C17 H17B 109.5 . . ?
C15 C17 H17C 109.5 . . ?
H17A C17 H17C 109.5 . . ?
H17B C17 H17C 109.5 . . ?
C15 C18 H18A 109.5 . . ?
C15 C18 H18B 109.5 . . ?
H18A C18 H18B 109.5 . . ?
C15 C18 H18C 109.5 . . ?
H18A C18 H18C 109.5 . . ?
H18B C18 H18C 109.5 . . ?
N1 C19 C20 111.35(18) . . ?
N1 C19 H19A 109.4 . . ?
C20 C19 H19A 109.4 . . ?
N1 C19 H19B 109.4 . . ?
C20 C19 H19B 109.4 . . ?
H19A C19 H19B 108.0 . . ?
N2 C20 C19 111.20(18) . . ?
N2 C20 H20A 109.4 . . ?
C19 C20 H20A 109.4 . . ?
N2 C20 H20B 109.4 . . ?
C19 C20 H20B 109.4 . . ?
H20A C20 H20B 108.0 . . ?
N1 C21 H21A 109.5 . . ?
N1 C21 H21B 109.5 . . ?
H21A C21 H21B 109.5 . . ?
N1 C21 H21C 109.5 . . ?
H21A C21 H21C 109.5 . . ?
H21B C21 H21C 109.5 . . ?
N1 C22 H22A 109.5 . . ?
N1 C22 H22B 109.5 . . ?
H22A C22 H22B 109.5 . . ?
N1 C22 H22C 109.5 . . ?
H22A C22 H22C 109.5 . . ?
H22B C22 H22C 109.5 . . ?
N2 C23 H23A 109.5 . . ?
N2 C23 H23B 109.5 . . ?
H23A C23 H23B 109.5 . . ?
N2 C23 H23C 109.5 . . ?
H23A C23 H23C 109.5 . . ?
H23B C23 H23C 109.5 . . ?
N2 C24 H24A 109.5 . . ?
N2 C24 H24B 109.5 . . ?
H24A C24 H24B 109.5 . . ?
N2 C24 H24C 109.5 . . ?
H24A C24 H24C 109.5 . . ?
H24B C24 H24C 109.5 . . ?
C26 C25 H25A 109.5 . . ?
C26 C25 H25B 109.5 . . ?
H25A C25 H25B 109.5 . . ?
C26 C25 H25C 109.5 . . ?
H25A C25 H25C 109.5 . . ?
H25B C25 H25C 109.5 . . ?
C27 C26 C25 112.0(2) . . ?
C27 C26 H26A 109.2 . . ?
C25 C26 H26A 109.2 . . ?
C27 C26 H26B 109.2 . . ?
C25 C26 H26B 109.2 . . ?
H26A C26 H26B 107.9 . . ?
C27 C27 C26 114.8(3) 7_656 . ?
C27 C27 H27B 108.6 7_656 . ?
C26 C27 H27B 108.6 . . ?
C27 C27 H27A 108.6 7_656 . ?
C26 C27 H27A 108.6 . . ?
H27B C27 H27A 107.6 . . ?
C5 Fe01 C10 104.51(8) . . ?
C5 Fe01 C4 40.90(8) . . ?
C10 Fe01 C4 119.72(8) . . ?
C5 Fe01 C7 157.55(8) . . ?
C10 Fe01 C7 68.56(8) . . ?
C4 Fe01 C7 161.15(8) . . ?
C5 Fe01 C9 121.23(8) . . ?
C10 Fe01 C9 40.86(8) . . ?
C4 Fe01 C9 106.04(8) . . ?
C7 Fe01 C9 68.31(8) . . ?
C5 Fe01 C8 158.59(8) . . ?
C10 Fe01 C8 68.74(8) . . ?
C4 Fe01 C8 123.46(8) . . ?
C7 Fe01 C8 40.71(8) . . ?
C9 Fe01 C8 40.62(8) . . ?
C5 Fe01 C2 68.68(8) . . ?
C10 Fe01 C2 159.61(8) . . ?
C4 Fe01 C2 68.48(8) . . ?
C7 Fe01 C2 110.01(8) . . ?
C9 Fe01 C2 159.09(8) . . ?
C8 Fe01 C2 124.38(8) . . ?
C5 Fe01 C3 68.70(8) . . ?
C10 Fe01 C3 156.68(8) . . ?
C4 Fe01 C3 40.73(8) . . ?
C7 Fe01 C3 125.88(8) . . ?
C9 Fe01 C3 122.26(8) . . ?
C8 Fe01 C3 109.05(8) . . ?
C2 Fe01 C3 40.58(8) . . ?
C5 Fe01 C1 41.26(8) . . ?
C10 Fe01 C1 121.48(8) . . ?
C4 Fe01 C1 69.20(8) . . ?
C7 Fe01 C1 122.84(8) . . ?
C9 Fe01 C1 157.99(8) . . ?
C8 Fe01 C1 159.53(8) . . ?
C2 Fe01 C1 40.91(8) . . ?
C3 Fe01 C1 68.96(8) . . ?
C5 Fe01 C6 120.12(8) . . ?
C10 Fe01 C6 41.09(8) . . ?
C4 Fe01 C6 155.86(8) . . ?
C7 Fe01 C6 40.79(8) . . ?
C9 Fe01 C6 68.91(8) . . ?
C8 Fe01 C6 68.93(8) . . ?
C2 Fe01 C6 124.41(8) . . ?
C3 Fe01 C6 161.62(8) . . ?
C1 Fe01 C6 106.20(7) . . ?
N2 Li1 N1 87.18(14) . . ?
N2 Li1 P3 125.56(16) . . ?
N1 Li1 P3 125.12(15) . . ?
N2 Li1 P1 119.76(15) . . ?
N1 Li1 P1 135.61(16) . . ?
P3 Li1 P1 69.47(8) . . ?
C21 N1 C22 108.50(18) . . ?
C21 N1 C19 109.28(18) . . ?
C22 N1 C19 110.53(18) . . ?
C21 N1 Li1 116.75(17) . . ?
C22 N1 Li1 109.13(16) . . ?
C19 N1 Li1 102.49(15) . . ?
C23 N2 C24 108.16(18) . . ?
C23 N2 C20 111.34(18) . . ?
C24 N2 C20 109.71(18) . . ?
C23 N2 Li1 106.70(17) . . ?
C24 N2 Li1 116.32(17) . . ?
C20 N2 Li1 104.59(15) . . ?
C1 P1 C11 101.68(9) . . ?
C1 P1 P2 106.06(6) . . ?
C11 P1 P2 104.31(7) . . ?
C1 P1 Li1 113.92(10) . . ?
C11 P1 Li1 135.73(10) . . ?
P2 P1 Li1 90.70(8) . . ?
P3 P2 P1 86.41(2) . . ?
C6 P3 C15 102.44(9) . . ?
C6 P3 P2 107.04(6) . . ?
C15 P3 P2 105.31(7) . . ?
C6 P3 Li1 114.21(10) . . ?
C15 P3 Li1 131.22(10) . . ?
P2 P3 Li1 93.88(8) . . ?
 
_refine_diff_density_max    0.376
_refine_diff_density_min   -0.194
_refine_diff_density_rms    0.048

_shelx_res_file
;
TITL STEFAN ISENBERG, -173 DEGC, CB
    C:\Daten\Struktur\Pietschnig\Borucki\sv0468\sv0468.res
    created by SHELXL-2017/1 at 16:00:28 on 08-Nov-2017
CELL  1.54186 10.21720 17.33860 34.69550 90.00000 90.73500 90.00000
ZERR 8  0.00030  0.00060  0.00090  0.00000  0.00200  0.00000
LATT 7
SYMM -X, Y, -Z+ 0.50000
SFAC C H FE LI N P
UNIT 216 392 8 8 16 24
TEMP -173
L.S. 50
ACTA
BOND $H
SIZE    0.033   0.152   0.179
FMAP 2
OMIT  -6  138
PLAN 20
WGHT    0.033700    8.497600
FVAR       0.13270
C1    1    0.222742    0.366424    0.634233    11.00000    0.01651    0.01453 =
         0.01404   -0.00236   -0.00130   -0.00148
C2    1    0.325606    0.318076    0.648967    11.00000    0.01638    0.01976 =
         0.01991   -0.00340   -0.00146    0.00263
AFIX  43
H2A   2    0.415347    0.321673    0.642362    11.00000   -1.20000
AFIX   0
C3    1    0.271546    0.263861    0.675072    11.00000    0.02612    0.01305 =
         0.02275   -0.00195   -0.00371    0.00026
AFIX  43
H3A   2    0.318567    0.225165    0.688816    11.00000   -1.20000
AFIX   0
C4    1    0.134425    0.277847    0.676963    11.00000    0.02057    0.01671 =
         0.02319   -0.00171   -0.00179   -0.00937
AFIX  43
H4A   2    0.073776    0.249998    0.692132    11.00000   -1.20000
AFIX   0
C5    1    0.104293    0.340806    0.652162    11.00000    0.01498    0.01980 =
         0.01982   -0.00058   -0.00439   -0.00427
AFIX  43
H5A   2    0.019794    0.362415    0.648097    11.00000   -1.20000
AFIX   0
C6    1    0.259461    0.489514    0.705603    11.00000    0.01593    0.01425 =
         0.01603   -0.00284    0.00088   -0.00113
C7    1    0.365585    0.445039    0.720972    11.00000    0.01438    0.01885 =
         0.01745   -0.00257   -0.00313   -0.00355
AFIX  43
H7A   2    0.455189    0.451625    0.714773    11.00000   -1.20000
AFIX   0
C8    1    0.315712    0.389322    0.747035    11.00000    0.02163    0.01844 =
         0.01711   -0.00014   -0.00493   -0.00089
AFIX  43
H8A   2    0.365665    0.352505    0.761182    11.00000   -1.20000
AFIX   0
C9    1    0.177749    0.398681    0.748085    11.00000    0.02178    0.01943 =
         0.01606    0.00089    0.00315   -0.00308
AFIX  43
H9A   2    0.119162    0.369324    0.763255    11.00000   -1.20000
AFIX   0
C10   1    0.142260    0.459632    0.722492    11.00000    0.01696    0.01843 =
         0.01948   -0.00250    0.00358    0.00110
AFIX  43
H10A  2    0.055817    0.477483    0.717450    11.00000   -1.20000
AFIX   0
C11   1    0.163878    0.418802    0.556810    11.00000    0.01980    0.01958 =
         0.01730   -0.00077   -0.00468   -0.00136
C12   1    0.016660    0.405141    0.561843    11.00000    0.02014    0.02654 =
         0.02529   -0.00313   -0.00729   -0.00175
AFIX 137
H12A  2    0.003347    0.363373    0.580415    11.00000   -1.20000
H12B  2   -0.022987    0.390900    0.536977    11.00000   -1.20000
H12C  2   -0.024377    0.452429    0.571351    11.00000   -1.20000
AFIX   0
C13   1    0.229755    0.344766    0.542988    11.00000    0.02727    0.02598 =
         0.02107   -0.00442   -0.00176   -0.00027
AFIX 137
H13A  2    0.189812    0.328520    0.518474    11.00000   -1.20000
H13B  2    0.218312    0.304083    0.562261    11.00000   -1.20000
H13C  2    0.323353    0.354254    0.539372    11.00000   -1.20000
AFIX   0
C14   1    0.181838    0.482073    0.526637    11.00000    0.03443    0.02768 =
         0.01961    0.00355   -0.00726   -0.00408
AFIX 137
H14C  2    0.275322    0.488934    0.521667    11.00000   -1.20000
H14B  2    0.145164    0.530546    0.536216    11.00000   -1.20000
H14A  2    0.136540    0.467292    0.502689    11.00000   -1.20000
AFIX   0
C15   1    0.233837    0.653854    0.692487    11.00000    0.01995    0.01511 =
         0.02246   -0.00247    0.00210    0.00083
C16   1    0.319680    0.661533    0.728652    11.00000    0.04474    0.01863 =
         0.02309   -0.00358   -0.00491    0.00133
AFIX 137
H16A  2    0.295988    0.621413    0.747195    11.00000   -1.20000
H16B  2    0.306281    0.712438    0.740226    11.00000   -1.20000
H16C  2    0.411847    0.655676    0.721739    11.00000   -1.20000
AFIX   0
C17   1    0.089394    0.656927    0.703033    11.00000    0.02852    0.02447 =
         0.04758   -0.01076    0.01283    0.00280
AFIX 137
H17A  2    0.069944    0.706875    0.714875    11.00000   -1.20000
H17B  2    0.070029    0.615474    0.721295    11.00000   -1.20000
H17C  2    0.035447    0.650404    0.679702    11.00000   -1.20000
AFIX   0
C18   1    0.264302    0.720181    0.664956    11.00000    0.03277    0.01607 =
         0.02691    0.00017   -0.00202    0.00094
AFIX 137
H18A  2    0.356826    0.718159    0.657920    11.00000   -1.20000
H18B  2    0.245994    0.769445    0.677641    11.00000   -1.20000
H18C  2    0.209604    0.715436    0.641667    11.00000   -1.20000
AFIX   0
C19   1    0.733712    0.535744    0.604078    11.00000    0.01389    0.04353 =
         0.03741    0.00359    0.00580   -0.00036
AFIX  23
H19A  2    0.729853    0.498958    0.582270    11.00000   -1.20000
H19B  2    0.826565    0.541699    0.612031    11.00000   -1.20000
AFIX   0
C20   1    0.680534    0.612675    0.591113    11.00000    0.01883    0.03799 =
         0.03169    0.00732    0.00074   -0.00753
AFIX  23
H20A  2    0.692350    0.650838    0.612095    11.00000   -1.20000
H20B  2    0.730193    0.630897    0.568553    11.00000   -1.20000
AFIX   0
C21   1    0.689902    0.422443    0.641822    11.00000    0.03114    0.02683 =
         0.04796    0.00064   -0.00240    0.00917
AFIX 137
H21A  2    0.783870    0.416844    0.647114    11.00000   -1.20000
H21B  2    0.666644    0.394189    0.618248    11.00000   -1.20000
H21C  2    0.640445    0.401575    0.663475    11.00000   -1.20000
AFIX   0
C22   1    0.691938    0.545295    0.672689    11.00000    0.02476    0.02937 =
         0.03526    0.00139   -0.00509   -0.00403
AFIX 137
H22A  2    0.666098    0.599541    0.670350    11.00000   -1.20000
H22B  2    0.786563    0.542031    0.677384    11.00000   -1.20000
H22C  2    0.645681    0.521608    0.694244    11.00000   -1.20000
AFIX   0
C23   1    0.521427    0.571753    0.542714    11.00000    0.03862    0.04449 =
         0.02535   -0.00293    0.00222   -0.01154
AFIX 137
H23A  2    0.554402    0.518686    0.543334    11.00000   -1.20000
H23B  2    0.569270    0.601412    0.523409    11.00000   -1.20000
H23C  2    0.427977    0.571421    0.535988    11.00000   -1.20000
AFIX   0
C24   1    0.482469    0.684645    0.579529    11.00000    0.04019    0.02972 =
         0.03650    0.00783   -0.00160    0.00043
AFIX 137
H24A  2    0.520334    0.714031    0.558275    11.00000   -1.20000
H24B  2    0.500864    0.711169    0.603946    11.00000   -1.20000
H24C  2    0.387578    0.680457    0.575603    11.00000   -1.20000
AFIX   0
C25   1    0.524365    0.227272    0.561752    11.00000    0.06009    0.05873 =
         0.04626    0.00917    0.00028    0.02455
AFIX 137
H25A  2    0.557740    0.178015    0.571641    11.00000   -1.20000
H25B  2    0.455805    0.217565    0.542343    11.00000   -1.20000
H25C  2    0.487942    0.257300    0.583007    11.00000   -1.20000
AFIX   0
C26   1    0.635621    0.272232    0.543522    11.00000    0.04842    0.04100 =
         0.04030   -0.00366   -0.01189    0.01315
AFIX  23
H26A  2    0.602357    0.322880    0.534586    11.00000   -1.20000
H26B  2    0.704805    0.281733    0.563190    11.00000   -1.20000
AFIX   0
C27   1    0.694245    0.229356    0.509675    11.00000    0.03974    0.02900 =
         0.03517   -0.00390   -0.01620    0.00437
AFIX  23
H27B  2    0.725991    0.178524    0.518823    11.00000   -1.20000
H27A  2    0.624241    0.219896    0.490254    11.00000   -1.20000
AFIX   0
FE01  3    0.235301    0.374352    0.693215    11.00000    0.01153    0.01350 =
         0.01557    0.00041   -0.00110   -0.00128
LI1   4    0.463079    0.530984    0.620723    11.00000    0.01623    0.02197 =
         0.02167    0.00169    0.00184   -0.00045
N1    5    0.658108    0.504300    0.636777    11.00000    0.01546    0.02382 =
         0.02956    0.00243    0.00132    0.00283
N2    5    0.540299    0.607219    0.580672    11.00000    0.01817    0.02574 =
         0.02104    0.00279   -0.00087   -0.00399
P1    6    0.249205    0.450242    0.602906    11.00000    0.01349    0.01622 =
         0.01567    0.00036   -0.00170   -0.00108
P2    6    0.125926    0.541577    0.625122    11.00000    0.01453    0.01710 =
         0.02106   -0.00036   -0.00387    0.00184
P3    6    0.279887    0.561443    0.667497    11.00000    0.01211    0.01359 =
         0.01597   -0.00026    0.00018   -0.00062
HKLF 4


REM  STEFAN ISENBERG, -173 DEGC, CB
REM R1 =  0.0309 for    4654 Fo > 4sig(Fo)  and  0.0393 for all    5340 data
REM    318 parameters refined using      0 restraints

END

WGHT      0.0337      8.4984

REM Highest difference peak  0.376,  deepest hole -0.194,  1-sigma level  0.048
Q1    1   0.2025  0.4258  0.5797  11.00000  0.05    0.38
Q2    1   0.2678  0.5198  0.6893  11.00000  0.05    0.29
Q3    1   0.1997  0.4914  0.7162  11.00000  0.05    0.26
Q4    1   0.2562  0.6145  0.6819  11.00000  0.05    0.26
Q5    1   0.1966  0.4147  0.6789  11.00000  0.05    0.26
Q6    1   0.1789  0.6595  0.6990  11.00000  0.05    0.26
Q7    1   0.5826  0.5112  0.6290  11.00000  0.05    0.25
Q8    1   0.1573  0.3527  0.6415  11.00000  0.05    0.24
Q9    1   0.2834  0.6553  0.7080  11.00000  0.05    0.24
Q10   1   0.3444  0.5577  0.6483  11.00000  0.05    0.24
Q11   1   0.2698  0.3346  0.7119  11.00000  0.05    0.23
Q12   1   0.2061  0.5463  0.6482  11.00000  0.05    0.23
Q13   1   0.3397  0.4283  0.7400  11.00000  0.05    0.21
Q14   1   0.1780  0.3517  0.7110  11.00000  0.05    0.21
Q15   1   0.2365  0.4005  0.6215  11.00000  0.05    0.21
Q16   1   0.2770  0.3365  0.6347  11.00000  0.05    0.21
Q17   1   0.1727  0.3653  0.6504  11.00000  0.05    0.21
Q18   1   0.1624  0.4379  0.7375  11.00000  0.05    0.21
Q19   1   0.6478  0.3500  0.5331  11.00000  0.05    0.20
Q20   1   0.1630  0.4473  0.5417  11.00000  0.05    0.20
;
_shelx_res_checksum    1648

_shelx_hkl_file
;
  -2   2   1  838.09    2.48   0
  -3   1   1   29.15    0.77   0
  -2   6  -1  326.94    2.47   0
   0   2   0 1369.25    2.18   0
   0   8  -5   64.14    1.42   0
   1   5  -3  441.15    1.84   0
  -1   1   1   14.80    0.42   0
  -4   4   0  468.70    3.01   0
  -3   5   0    1.22    0.99   0
  -1   7  -2    2.16    0.96   0
   0   6  -2   72.37    1.26   0
  -1   5   0    3.64    0.98   0
   0  -2  -1  593.91    1.54   0
   1  -1  -2 2063.40    2.88   0
   2   0  -4  555.78    1.71   0
  -4   2   1  346.83    2.32   0
  -2   6   0    0.80    0.96   0
  -1   3   1  491.13    1.95   0
   0   8  -4  365.61    2.63   0
  -3  -1   1   28.09    0.48   0
  -4   0   1   -0.18    0.68   0
  -4   4   1  178.76    1.99   0
  -3   5   1   39.79    1.31   0
  -1  -3  -1 1395.00    2.41   0
  -1   7  -1    4.21    0.93   0
   0   4   0  153.61    1.24   0
   1   7  -4   79.42    1.26   0
  -2   2   2  409.68    1.87   0
   0   8  -3   47.33    1.49   0
  -3   1   2  991.22    2.80   0
  -1   5   1   54.68    1.19   0
   1   5  -2   23.74    0.73   0
  -2   4   2  432.79    2.39   0
  -2   6   1  580.32    3.06   0
  -4   2   2   68.94    1.20   0
  -3   5   2   64.28    1.41   0
   2   0  10 1137.38    3.47   0
   0   0   7    0.02    0.33   0
   2   0   9    1.35    0.81   0
   1  -1  14  177.51    1.50   0
   2  -2  17  242.04    2.15   0
   2   0  -2 9999.99    6.15   0
   3  -1  -6  194.94    0.97   0
  -1  -1  10  199.61    0.73   0
   0   0   6  234.05    0.87   0
   3  -1  12 1847.19    5.34   0
   2  -2  16   18.43    1.15   0
   3  -1  11    7.19    1.07   0
   0   0   5    0.21    0.30   0
   2   0  -1   -0.00    0.46   0
   2   0   6 2246.65    4.35   0
   4  -2  12   13.63    1.03   0
   2   0   0 9132.50    6.78   0
   2   0   5    0.03    0.83   0
   3  -1  -5   28.51    0.60   0
   4  -2  11  910.92    4.25   0
   0   0   4  828.25    1.34   0
   2  -2  15   59.07    1.37   0
   2   0   1    0.87    0.65   0
   2   0   2    4.52    0.73   0
   2   0   3   -0.31    0.76   0
   2   0   4   16.40    0.77   0
   3  -3  16    2.87    1.25   0
   3  -1   9   -0.06    0.96   0
   4  -2  10  200.75    2.17   0
   3  -1   8    2.13    0.96   0
   4  -2   9   90.06    1.72   0
   5  -3   8   -2.00    1.45   0
   2  -2  14  124.96    1.68   0
   3  -3  15  101.11    1.80   0
   3  -1  -4   11.51    0.61   0
   5  -3   7   72.96    1.83   0
   0   0   3    0.23    0.13   0
   1  -1  11    3.35    0.69   0
   3  -1   7  208.97    1.84   0
   4  -2   8   55.57    1.42   0
   5  -3   5  203.66    2.37   0
   5  -3   6   60.31    1.76   0
   2  -2  13  156.94    1.80   0
   3  -3  14  508.56    3.22   0
   3  -1  -3   65.32    0.88   0
   3  -1   6  688.72    2.92   0
   4  -2   7   67.93    1.49   0
   5  -3  -2   49.99    1.30   0
   5  -3  -1   98.54    1.62   0
   5  -3   3   14.07    1.36   0
   5  -3   4    3.46    1.50   0
   3  -1   5    2.69    0.92   0
   4  -2   5  289.69    2.28   0
   4  -2   6   20.91    1.16   0
   5  -3   1 1343.50    5.15   0
   5  -3   2   52.63    1.68   0
   3  -1   4  408.79    2.11   0
   0   4   0  163.43    1.55   0
   0  10 -11  104.62    2.89   0
   1  11  -9   32.72    2.50   0
   3   3   5   44.48    0.98   0
   3   9   0    3.18    2.00   0
   4   6   4  188.63    2.60   0
   4   8   2   40.34    2.02   0
  -1   3  -3 1033.31    2.66   0
  -1   7  -7  143.31    2.04   0
   0  10 -10  159.71    2.92   0
   1   5   2    6.52    1.15   0
   1   9  -3  101.93    2.22   0
   2  10  -3  176.78    2.91   0
   3   7   3   16.71    1.62   0
   4  10  -1  266.52    3.81   0
  -1   5  -4   14.28    0.90   0
   0   6  -1  932.15    3.99   0
   0  10  -9  416.17    4.30   0
   1  11  -8    4.30    2.03   0
   2   6   3  217.44    2.24   0
   2   8   1    4.19    1.35   0
   2  10  -2   -1.50    1.97   0
  -1   7  -6  291.28    2.67   0
   0  10  -8   10.04    1.92   0
   1   3   3 1052.79    3.06   0
   1   9  -2  316.95    3.27   0
   1  11  -7   31.04    2.30   0
   3   9   1  510.82    4.45   0
   4   8   3   36.12    1.97   0
   4  10   0   15.42    2.10   0
   0   8  -3   49.02    1.37   0
   0  10  -7  614.19    4.85   0
   1  11  -6   19.41    2.34   0
   3   5   5 1374.10    4.81   0
   4   6   5    3.09    1.57   0
  -1   7  -5   95.68    2.07   0
   1   9  -1  179.24    2.60   0
   2   8   2    8.20    1.46   0
   2  10  -1  217.43    3.08   0
   3   7   4   58.09    1.86   0
   3   9   2  261.22    3.48   0
   4  10   1  354.26    4.13   0
  -1   9  -9    2.27    1.77   0
   0   4   1   17.61    1.00   0
   0   6   0  115.22    1.76   0
   0   8  -2  154.93    2.28   0
   0  10  -6  123.90    2.61   0
   1   5   3    7.97    1.07   0
   1  11  -5  274.91    3.88   0
   2   6   4   -1.31    1.00   0
   3  11  -1   32.72    2.52   0
  -1   9  -8  136.95    2.80   0
   0  10  -5   14.11    1.91   0
   1  11  -4  644.14    5.37   0
   2   4   5    0.29    0.77   0
   2  10   0  396.94    4.13   0
   4   8   4    8.19    1.48   0
  -1   3  -2 1005.76    2.64   0
  -1   7  -4  133.42    2.03   0
   1   9   0    2.13    1.00   0
   2   2   5   22.13    0.68   0
   2   8   3   27.43    1.50   0
   3   3   6    3.97    0.70   0
   3   7   5  467.81    3.62   0
   3   9   3  323.74    3.60   0
   3  11   0   54.87    2.52   0
   4  10   2   -2.92    1.91   0
  -1   5  -2    7.17    1.09   0
  -1   9  -7   15.37    1.69   0
   0   6   1  889.17    3.91   0
   0   8  -1  155.42    2.07   0
   0  10  -4  198.39    3.20   0
   1  11  -3  375.66    4.26   0
   2  10   1  568.19    4.81   0
   3   5   6   11.82    1.07   0
   1   3   4 1225.47    3.33   0
   2   6   5  152.85    1.98   0
   3  11   1   27.02    2.24   0
   4   8   5   48.31    2.04   0
   4  10   3    7.68    1.85   0
  -1   7  -3  114.31    1.89   0
  -1   9  -6  171.69    2.51   0
   0   4   2  670.13    2.77   0
   0   8   0   19.57    1.47   0
   0  10  -3  529.95    4.44   0
   1   5   4   14.87    1.12   0
   1  11  -2  721.13    5.53   0
   2   8   4  119.06    2.32   0
   2  10   2   62.54    2.47   0
   3   9   4  463.30    4.16   0
  -1   9  -5   28.47    1.75   0
   1  11  -1   15.25    2.16   0
   3   7   6   32.61    1.52   0
   3  11   2  225.86    3.57   0
  -1   5  -1  246.93    2.02   0
  -1   7  -2    1.99    1.13   0
   0   6   2   67.02    1.55   0
   0  10  -2   97.33    2.53   0
   2   4   6    6.79    0.77   0
   4  10   4    7.81    2.14   0
  -1   9  -4  584.10    4.17   0
   0   8   1  154.63    2.28   0
   1  11   0  135.43    3.03   0
   2   6   6  142.57    1.94   0
   2   8   5   23.99    1.81   0
   2  10   3  140.50    2.89   0
   3   5   7  398.64    2.63   0
   3   9   5   31.38    1.98   0
  -1   3  -1 1429.05    3.17   0
   0  10  -1  293.87    3.53   0
   1   9   3  824.16    4.86   0
  -2   4  -6    7.82    0.73   0
  -2   6  -6  131.29    1.77   0
  -1   9  -3  800.22    4.76   0
   1   5   5   30.73    0.93   0
   1  11   1  117.78    2.92   0
   2  10   4  200.55    3.05   0
   3   7   7  190.72    2.36   0
   4  10   5  158.32    3.12   0
  -1   5   0    5.25    0.94   0
   0   4   3  352.69    2.14   0
   0   6   3    4.12    1.19   0
   0   8   2  156.21    2.31   0
   0  10   0  678.42    4.87   0
   0  12  -4  141.46    3.19   0
   2   8   6   99.09    2.23   0
   3   9   6    4.21    1.64   0
  -1   9  -2  233.68    2.89   0
  -1  11  -6   45.66    2.26   0
   0  12  -3  210.30    3.50   0
   1   3   5  940.51    2.92   0
   1   9   4  581.16    4.17   0
   1  11   2  757.75    5.62   0
   2   2   6 1125.62    2.75   0
   2   6   7  129.48    2.13   0
  -1   7   0   22.11    1.24   0
  -1  11  -5  410.30    4.15   0
   0  10   1  316.72    3.47   0
   2   4   7  469.05    2.53   0
   2  10   5  196.12    3.10   0
  -2   4  -5    0.30    0.63   0
  -1   9  -1  115.18    2.30   0
  -1  11  -4   64.95    2.31   0
   0  12  -2  138.05    3.05   0
   1   5   6  120.82    1.59   0
   3   7   8    1.57    1.24   0
   3   9   7   10.04    1.73   0
  -1   3   0    2.98    0.63   0
  -1   5   1   55.82    1.28   0
   0   6   4    3.93    1.19   0
   0  10   2   89.38    2.44   0
   0  12  -1   19.93    2.16   0
   1   9   5   27.54    1.57   0
   1  11   3  277.19    3.77   0
   2   8   7   11.60    1.66   0
  -1   7   1   75.17    1.59   0
  -1   9   0    1.34    1.72   0
  -1  11  -3  271.75    3.53   0
   0   4   4  228.11    1.85   0
   0   8   4  378.53    3.25   0
   2  10   6   27.07    2.18   0
  -1  11  -2  750.54    5.36   0
   0  12   0  506.88    4.93   0
   1  11   4   70.80    2.57   0
   2   6   8    3.23    1.28   0
  -2   4  -4   31.23    0.89   0
   0   6   5  548.66    3.23   0
   0  10   3  520.44    4.13   0
   1   3   6   11.60    0.87   0
   1   9   6  181.21    2.73   0
   2   8   8  144.57    2.42   0
   2  10   7  333.19    3.80   0
   3   7   9  263.84    2.74   0
  -1   5   2   24.57    1.16   0
  -1   7   2   61.59    1.58   0
  -1   9   1  172.35    2.67   0
  -1  11  -1  116.80    2.67   0
   0   8   5   62.88    1.87   0
   1   5   7  229.04    2.04   0
   1  11   5  437.05    4.44   0
   2   4   8  304.78    2.10   0
   0  10   4  198.90    2.97   0
   1   9   7   16.43    1.78   0
   3   9   9    2.73    1.71   0
  -2   6  -2  152.79    1.83   0
  -1   3   1  479.68    2.05   0
  -1   9   2  318.25    3.20   0
  -1  11   0  137.38    2.86   0
   0   4   5 1895.18    4.73   0
   2  10   8   29.38    2.04   0
  -2   4  -3   82.21    1.16   0
   0   6   6   19.18    1.25   0
   0   8   6   32.42    1.71   0
   0  10   5   13.74    1.66   0
   0  12   3  208.11    3.66   0
   1  11   6   43.72    1.96   0
   2   2   7    7.73    0.54   0
   2   8   9   11.96    1.50   0
  -2  10  -3  134.39    2.71   0
  -1   5   3  441.82    2.65   0
  -1   9   3  103.19    2.28   0
  -1  11   1   13.86    2.12   0
   1   5   8   14.71    1.04   0
   1   9   8  141.19    2.67   0
  -2   6  -1  313.90    2.48   0
  -2   8  -1    2.30    1.40   0
  -2  10  -2   60.85    2.26   0
  -1  11   2  700.22    5.31   0
   1  11   7   73.81    2.61   0
   2  10   9  163.43    2.88   0
   3   9  10    0.26    1.61   0
   0   8   7    7.33    1.37   0
   0  10   6  126.29    2.60   0
   1   3   7  220.54    1.59   0
   2   4   9  250.54    1.95   0
   2   8  10   78.49    1.97   0
  -2   4  -2  437.56    2.15   0
  -2   6   0    0.06    1.09   0
  -2   8   0  115.73    2.17   0
  -2  10  -1  555.50    4.43   0
  -1   9   4   18.62    1.18   0
  -1  11   3  338.40    4.02   0
   0   4   6  303.01    2.14   0
   0   6   7  375.24    2.81   0
   1   7   9  126.89    2.10   0
   1   9   9    2.34    1.60   0
   1  11   8   82.32    2.60   0
  -1   3   2  162.00    1.39   0
  -1   5   4   93.34    1.58   0
   0   2   4  686.16    2.17   0
   0  10   7  522.74    4.47   0
   2  10  10  224.35    3.26   0
  -2   8   1  105.65    2.16   0
  -2  10   0  451.99    4.06   0
  -1   9   5  451.26    3.81   0
  -1  11   4  649.28    5.24   0
   0   8   8  200.38    2.56   0
   1   5   9  430.00    2.79   0
   2   8  11   42.51    2.05   0
  -2   4  -1   17.55    0.89   0
  -2   6   1  581.83    3.30   0
  -2  10   1  213.85    3.02   0
   0   6   8  121.54    1.89   0
   1   7  10   93.23    2.00   0
   1   9  10   57.22    2.25   0
   1  11   9   79.36    2.49   0
  -2   8   2  397.92    3.37   0
  -1   5   5   83.82    1.57   0
  -1   9   6  339.47    3.39   0
  -1  11   5  272.83    3.72   0
   0   4   7  752.32    3.22   0
   0  10   8   11.01    2.00   0
   2   4  10  182.27    1.74   0
   2  10  11   34.73    2.07   0
  -2  10   2    0.85    1.78   0
  -2  12   0  330.47    4.19   0
  -1   3   3  171.43    1.49   0
   0   8   9    6.63    1.32   0
   1   3   8  565.38    2.48   0
   2   2   8    4.89    0.52   0
  -2   6   2  148.59    1.94   0
  -2   8   3  343.59    3.23   0
  -1  11   6   16.43    2.17   0
   0  10   9  403.50    4.17   0
   1   5  10    4.17    1.12   0
   1   9  11  205.16    3.10   0
   2   8  12  259.63    2.99   0
  -2   4   0   62.53    1.08   0
  -2  10   3  168.87    2.93   0
  -1   7   7   33.90    1.61   0
  -1   9   7   11.64    1.56   0
   1   7  11  132.43    2.25   0
   2  10  12   71.48    2.29   0
  -2   6   3 1149.48    4.62   0
  -2   8   4  469.76    3.70   0
  -1   5   6   15.54    1.25   0
  -1  11   7   27.35    2.28   0
   0   2   5   41.39    0.85   0
   0   8  10  295.32    3.08   0
   2   6  12  288.08    2.62   0
  -2  10   4   84.51    2.50   0
  -1   9   8   11.19    1.53   0
   0   4   8  416.71    2.56   0
   0  10  10  155.35    3.01   0
   1   9  12   42.88    2.07   0
   2   4  11  180.63    1.85   0
  -2   4   1   58.80    1.15   0
  -1   3   4 1002.85    3.25   0
  -1   7   8   83.99    1.97   0
   1   3   9  251.83    1.87   0
   1   5  11   65.24    1.60   0
   2  10  13   43.41    2.31   0
  -2   6   4  583.38    3.44   0
  -2   8   5    4.77    1.70   0
  -2  10   5   18.91    2.06   0
  -1   5   7 1741.47    5.51   0
  -1  11   8    2.34    1.62   0
   0   8  11    0.90    1.67   0
   0  10  11  109.51    2.78   0
  -3   7  -1   63.09    1.59   0
  -3   9   0   -0.64    1.75   0
  -1   9   9   19.86    1.32   0
   1   9  13   47.55    2.07   0
   2   6  13  141.68    2.13   0
  -2   4   2  437.05    2.46   0
  -2   6   5  458.45    3.18   0
  -2   8   6    1.06    1.65   0
  -2  10   6   28.11    2.23   0
  -1   7   9   63.53    1.95   0
  -1  11   9   34.54    2.37   0
   0   4   9  409.15    2.60   0
   1   7  13  255.17    3.07   0
   2   2   9   44.72    0.76   0
   2   8  14   93.76    2.31   0
  -3   9   1  161.99    2.82   0
  -1   3   5  544.21    2.58   0
  -1   5   8   34.41    1.38   0
  -1   9  10  147.54    2.75   0
   0   2   6  291.31    1.63   0
   0   6  11   18.37    1.04   0
   0   8  12   85.47    2.36   0
   0  10  12   85.60    2.61   0
   1   5  12   89.71    1.77   0
  -3   9   2    2.63    1.69   0
  -2   8   7   18.88    1.64   0
  -2  10   7  111.36    2.81   0
  -1   7  10   95.48    2.07   0
   1   9  14   89.11    2.44   0
   2   4  12  133.82    1.63   0
  -3  11   2   43.91    2.66   0
  -2   4   3   13.92    0.99   0
  -1   9  11   96.89    2.57   0
   0  10  13   94.78    2.69   0
   1   3  10  154.06    1.63   0
  -3   5  -2  337.68    2.52   0
  -3   9   3  393.22    3.88   0
  -3  11   3  199.31    3.46   0
  -2   8   8  197.62    2.84   0
  -2  10   8   79.61    2.64   0
  -1   5   9  931.14    4.30   0
   0   4  10    8.96    1.04   0
   0   6  12  584.97    3.84   0
   0   8  13   47.98    2.14   0
  -3   9   4   84.31    2.39   0
  -2   4   4  153.04    1.74   0
  -1   3   6  957.00    3.48   0
  -1   7  11   15.88    1.43   0
   1   9  15    7.20    1.80   0
  -3   5  -1    1.87    0.91   0
  -3   7   3  224.07    2.69   0
  -3  11   4  210.75    3.65   0
  -2   8   9   47.92    1.89   0
  -2  10   9  264.25    3.75   0
  -1   9  12  204.13    3.33   0
   0   2   7   86.72    1.18   0
  -3   5   0    0.86    1.21   0
  -3   9   5    8.28    1.85   0
  -3  11   5  129.24    2.96   0
   0   4  11   82.74    1.51   0
   0   8  14    2.68    1.95   0
   1   3  11   11.11    1.20   0
   1   7  15  230.23    2.86   0
   2   2  10  785.32    2.59   0
  -3   7   4  150.12    2.44   0
  -2   4   5  266.38    2.24   0
  -2   6   8  101.03    2.00   0
  -2  10  10   -1.00    2.10   0
  -1   3   7 2296.01    5.46   0
  -1   7  12   53.07    1.76   0
  -1   9  13  147.16    2.99   0
   1   9  16  181.02    3.16   0
  -3   5   1   41.30    1.37   0
  -3   7   5 1373.39    6.10   0
  -3   9   6  367.67    3.89   0
  -2   8  10  276.83    3.27   0
   0   8  15  637.38    4.92   0
  -3   9   7   40.41    2.19   0
  -2   6   9   15.43    1.49   0
  -2  10  11  114.98    2.97   0
   0   2   8  982.98    3.21   0
  -3   5   2   62.61    1.59   0
  -2   4   6   17.61    0.96   0
  -2   8  11  206.25    3.11   0
  -1   3   8   16.98    1.19   0
  -1   7  13   32.77    1.39   0
  -1   9  14  203.45    3.40   0
   0   4  12   16.08    1.21   0
   1   7  16 1072.53    5.69   0
  -3   5   3  142.90    2.06   0
  -3   9   8   51.09    2.40   0
  -2   6  10   17.54    1.52   0
   0   8  16  560.35    4.65   0
   1   3  12    8.53    0.96   0
  -3   7   7   15.69    1.72   0
  -2   4   7  396.32    2.80   0
  -2   8  12  275.60    3.49   0
  -1   5  12    8.86    1.38   0
  -1   7  14  834.81    5.22   0
  -1   9  15   89.86    2.74   0
   1   5  15  629.52    3.83   0
  -3   5   4  123.54    2.00   0
  -3   9   9   13.39    2.12   0
   0   2   9  260.56    1.85   0
   0   4  13   69.97    1.64   0
   1   7  17  238.73    3.19   0
  -3   7   8  318.68    3.42   0
  -2   2   0  646.37    2.30   0
  -2   4   8    9.72    1.24   0
  -2   6  11  140.66    2.42   0
  -2   8  13  189.64    3.21   0
  -1   3   9  569.82    2.99   0
   0   8  17  249.81    3.41   0
   1   1   8  111.32    1.02   0
  -3   5   5 1241.92    5.15   0
  -3   9  10  133.26    3.06   0
   0   6  16   46.50    2.03   0
   1   3  13  168.50    1.83   0
   1   5  16   53.97    1.84   0
  -4   8   4  354.69    4.07   0
  -3   7   9  163.24    2.75   0
  -3   9  11   19.46    2.25   0
  -2   2   1  842.38    2.72   0
  -2   6  12  758.32    4.75   0
  -2   8  14   11.55    2.18   0
  -1   3  10  198.93    2.08   0
  -3   7  10   29.88    2.08   0
  -2   4   9    4.95    1.26   0
   0   2  10  161.93    1.62   0
   0   8  18 1256.58    6.97   0
  -4   8   5   30.28    2.04   0
  -3   9  12  115.14    2.97   0
  -2   2   2  417.60    2.10   0
  -1   5  14  310.06    3.01   0
   0   6  17  838.68    5.13   0
  -4   8   6   59.57    2.21   0
  -3   7  11   27.86    1.98   0
  -1   3  11  548.83    3.24   0
   1   3  14  201.36    2.00   0
   1   5  17   10.86    1.47   0
  -4   8   7   19.89    2.12   0
  -2   2   3   33.75    1.02   0
  -1   5  15  279.03    3.13   0
  -1   7  17   -0.95    1.95   0
   0   4  15  207.27    2.59   0
   1   1   9  218.29    1.40   0
  -4   8   8  291.23    3.92   0
  -3   7  12   43.68    2.35   0
  -2   2   4  421.63    2.38   0
  -2   6  14   55.48    1.60   0
  -2   8  16  246.17    3.74   0
  -1   1   4  812.01    2.57   0
   0   2  11   21.69    0.99   0
  -4   6   4   61.51    1.85   0
  -3   3  -2  250.24    1.76   0
  -3   3  -1  247.66    1.90   0
  -3   3   0    3.45    1.01   0
  -3   5   9  703.85    4.24   0
  -1   3  12   34.17    1.39   0
  -1   7  18   49.50    2.34   0
  -4   8   9  115.63    2.78   0
  -3   3   1   49.85    1.27   0
  -3   5  10  278.14    3.02   0
  -3   7  13   94.82    2.76   0
  -2   2   5  564.46    2.83   0
  -2   4  12  363.94    3.20   0
  -2   6  15   50.53    2.02   0
  -1   1   5   20.93    0.93   0
  -1   5  16    4.63    1.77   0
   0   4  16  223.25    2.59   0
  -4   6   6   47.36    1.98   0
  -4   8  10  118.61    2.83   0
  -3   3   2   24.16    1.25   0
  -3   3   3   27.73    1.28   0
   0   2  12  515.76    2.82   0
   0   6  19    4.86    1.65   0
  -4   6   7  968.88    5.46   0
  -3   3   4  227.94    2.25   0
  -3   5  11  292.64    3.09   0
  -3   7  14  688.35    5.39   0
  -2   2   6   17.52    1.20   0
  -2   6  16    6.63    1.99   0
  -1   3  13  131.39    1.94   0
  -1   5  17   88.77    2.34   0
  -1   7  19  407.68    4.24   0
  -4   6   8   35.77    1.85   0
  -4   8  11   46.83    2.37   0
  -2   2   7   16.87    1.19   0
  -2   4  13   46.77    1.41   0
  -1   1   6 1251.93    3.48   0
   0   4  17    5.41    1.28   0
   1   3  16   95.28    1.77   0
  -4   6   9   56.33    2.58   0
  -4   8  12  452.49    4.74   0
  -3   3   5    5.23    1.06   0
  -3   5  12    5.27    1.54   0
  -3   7  15  124.42    2.93   0
  -2   6  17  531.38    4.65   0
   0   2  13  208.66    2.05   0
   0   6  20    4.59    1.83   0
  -3   3   6  387.35    2.84   0
  -2   2   8    1.47    1.14   0
  -2   4  14   37.94    1.75   0
  -1   1   7  133.10    1.50   0
  -3   3   7  131.41    1.93   0
  -3   5  13  289.65    3.06   0
  -3   7  16  157.00    3.25   0
  -2   6  18   46.19    2.29   0
   0   4  18 1079.20    5.31   0
  -4   6  11    5.08    2.07   0
  -3   3   8  126.74    1.97   0
  -3   5  14   19.56    1.64   0
  -2   2   9  531.24    3.17   0
  -2   4  15    4.82    1.33   0
  -1   1   8   20.63    1.10   0
  -1   3  15    9.88    1.39   0
   0   2  14   70.43    1.53   0
   0   6  21    4.07    2.12   0
  -4   4   2   74.09    1.74   0
  -4   4   3  290.62    2.79   0
  -4   4   4   60.14    1.93   0
  -1   5  19  164.40    2.79   0
  -4   6  12  183.82    3.24   0
  -3   5  15  211.94    2.98   0
  -2   2  10   12.72    1.00   0
  -2   4  16  347.71    3.39   0
  -2   6  19  104.99    2.76   0
  -1   1   9    8.81    1.08   0
   0   4  19   25.43    1.60   0
   1   1  12  688.52    2.72   0
  -4   6  13   39.41    2.33   0
  -2   2  11  195.18    2.22   0
  -1   5  20   19.11    1.77   0
   0   2  15  218.59    2.23   0
  -5   7   8  128.96    2.85   0
  -4   4   8   79.79    2.11   0
  -4   6  14   -2.74    2.10   0
  -3   5  16   53.73    2.29   0
  -2   4  17   19.60    1.67   0
  -2   6  20    5.84    1.95   0
  -1   3  17   18.59    1.56   0
  -5   7  10   24.96    2.67   0
  -2   2  12  125.29    1.97   0
   0   2  16   41.25    1.38   0
   0   4  20  491.37    3.95   0
   1   1  13   74.70    1.22   0
  -5   7  11   58.83    2.72   0
  -4   4  10  217.98    2.87   0
  -4   6  15  100.29    2.81   0
  -3   3  12  253.07    2.78   0
  -3   5  17  120.53    2.81   0
  -2   4  18  153.81    2.65   0
  -1   1  11  507.53    2.83   0
  -1   5  21   24.73    1.84   0
  -4   4  11   83.20    2.20   0
  -3   3  13 1581.44    6.35   0
  -1   1  12   24.89    1.13   0
  -1   3  18   28.59    1.85   0
   0   0   7    0.82    0.58   0
  -4   6  16   66.21    2.25   0
  -3   5  18    3.11    1.92   0
  -2   2  14    0.02    1.25   0
  -2   4  19    9.29    1.87   0
  -1   5  22  108.62    2.47   0
   1   1  14  169.66    1.66   0
  -5   5   6    8.93    2.14   0
  -5   5   7   57.66    2.61   0
  -4   4  12  554.13    4.39   0
  -3   3  14  217.15    2.67   0
  -3   5  19    4.94    1.91   0
  -1   1  13  746.11    3.57   0
  -1   3  19  115.10    2.15   0
   0   0   8  887.50    2.68   0
  -5   5   8   18.99    1.77   0
  -4   4  13   43.20    2.21   0
  -3   3  15   54.29    1.78   0
  -2   2  15  268.11    2.74   0
  -2   4  20  147.78    2.80   0
   0   0   9    0.07    0.62   0
  -5   5   9   18.11    1.80   0
  -5   5  10   -1.77    1.83   0
  -4   4  14  129.12    2.75   0
  -1   1  14   54.42    1.33   0
  -1   3  20  109.19    2.16   0
  -5   5  11   75.85    2.36   0
  -4   4  15   50.09    2.23   0
  -3   3  16   39.64    1.69   0
  -2   2  16  242.72    2.64   0
  -2   4  21  102.42    2.45   0
   0   0  10   16.76    0.76   0
  -5   5  12   40.15    2.14   0
  -3   3  17   13.54    1.79   0
   0   2  19  829.16    4.28   0
  -5   5  13  158.24    3.10   0
  -4   4  16  413.71    4.16   0
  -2   2  17  621.40    4.09   0
  -1   3  21  334.89    3.41   0
   0   0  11    1.11    0.66   0
  -5   5  14    1.83    1.93   0
  -4   4  17   34.97    2.23   0
  -3   1   5   30.13    1.13   0
  -3   1   6  196.24    2.00   0
  -3   1   7  423.03    2.85   0
  -3   1   8   31.10    1.36   0
  -3   3  18   43.09    2.22   0
  -2   4  22   11.59    1.88   0
   0   0  12   35.69    1.03   0
  -4   2   4    4.35    1.14   0
  -4   2   5   43.20    1.57   0
  -4   2   6   14.63    1.48   0
  -4   2   9  294.07    2.95   0
  -3   1   3   66.10    1.14   0
  -3   1  10   75.23    1.67   0
  -2   2  18   17.38    1.20   0
  -1   3  22  311.47    3.29   0
  -4   2  10   16.32    1.51   0
  -4   4  18  311.37    3.70   0
  -3   3  19    1.53    1.81   0
  -2   2  19  677.13    4.47   0
  -1   1  17   43.97    1.64   0
   0   0  13   -0.59    0.90   0
  -4   2   2   68.18    1.28   0
  -4   2  12  173.93    2.57   0
  -3   1  12   40.66    1.62   0
  -3   3  20  131.93    2.81   0
  -2   0   5   -0.41    0.89   0
  -2   0   6 1679.69    4.41   0
  -2   0   7   -0.12    1.02   0
  -2   0   8  152.46    1.77   0
  -2   0   9    0.30    1.08   0
  -1   3  23  348.14    3.81   0
  -5   3   6  628.14    4.18   0
  -5   3   7  250.46    2.95   0
  -5   3   8   11.95    1.78   0
  -5   3   9  204.47    2.96   0
  -4   2   1  342.62    2.20   0
  -4   2  13  219.02    2.86   0
  -3   1   1   29.30    0.74   0
  -3   1  13  892.80    4.61   0
  -2   0   4  586.12    2.39   0
  -2   0  10  124.88    1.78   0
  -2   2  20  160.44    2.73   0
  -1   1  18   13.97    1.38   0
   0   0  14  267.93    2.06   0
  -5   3   5   35.38    1.66   0
  -5   3  10   16.00    1.80   0
  -5   3  11  123.31    2.52   0
  -4   2  14  153.99    2.53   0
  -3   1  14   29.72    1.50   0
  -3   3  21   97.07    2.52   0
  -2   0   3   -0.61    0.69   0
  -2   0  11   -1.75    1.08   0
  -2   0  12    3.57    1.09   0
  -5   3  12    0.88    1.82   0
  -5   3  13  397.89    4.10   0
  -4   2  15  102.13    2.28   0
  -3   1  15  290.84    2.90   0
  -1   1  19   28.89    1.52   0
   0   0  15   -0.84    0.90   0
  -5   3  14  396.33    4.12   0
  -4   2  16  260.44    3.27   0
  -3   1   0    1.59    0.51   0
  -3   1  16   75.78    1.83   0
   0   0  16  169.82    1.91   0
  -5   3  15  323.84    3.82   0
  -4   2  17  359.01    3.84   0
  -3   1  17    4.86    1.38   0
  -2   0   2 9732.19    7.93   0
  -2   2  22   13.59    1.66   0
  -1   1  20   31.18    1.59   0
  -4   2  18   32.20    2.19   0
  -2   0  15    0.28    0.82   0
   0   0  17   -0.57    0.86   0
  -3   1  18  271.65    3.21   0
  -2   0  16   26.47    1.31   0
  -2   2  23    0.73    1.58   0
  -1   1  21  427.84    3.46   0
  -4   2  19  316.07    3.76   0
  -3   1  -1  337.86    1.48   0
  -3   1  19   73.89    2.28   0
  -2   0   1   -0.17    0.44   0
  -2   0  17    0.59    1.46   0
  -1  -1   9    8.79    0.94   0
  -1  -1  10  191.51    1.72   0
  -2   0  18  134.95    2.30   0
  -1  -1   7  140.31    1.34   0
  -1  -1   8   20.72    0.73   0
  -1  -1  11  509.76    2.67   0
  -1  -1  12   26.84    1.03   0
  -1   1  22    5.46    1.57   0
  -1  -1   6 1304.11    3.21   0
  -1  -1  13  759.36    3.39   0
  -3   1  21  132.02    2.58   0
  -2   0  19   -0.36    1.46   0
  -1  -1  14   55.05    1.32   0
  -5   1   9  203.62    2.79   0
  -5   1  10   66.95    2.02   0
  -5   1  11   13.35    1.73   0
  -4   0   9    0.20    1.15   0
  -4   0  10  256.98    2.67   0
  -4   0  12    3.45    1.40   0
  -4   0  13   -0.90    1.25   0
  -3   1  22  170.12    2.86   0
  -2   0  20  752.79    4.61   0
  -1  -1   5   23.84    0.75   0
  -1  -1  15    6.39    1.10   0
  -5   1   8  109.96    2.09   0
  -5   1  13  159.06    2.78   0
  -5   1  14   29.86    2.14   0
  -4   0   6   53.01    1.43   0
  -4   0   7    0.46    1.05   0
  -4   0  14   42.95    1.72   0
  -4   0  15   -1.57    1.49   0
  -5   1  15  133.97    2.80   0
  -4   0  16   34.61    1.82   0
  -3  -1   9  243.77    2.26   0
  -3  -1  12   40.71    1.58   0
  -2   0  21   -0.03    1.43   0
  -1  -1   4  850.72    2.25   0
  -1  -1  17   45.59    1.48   0
  -6   2   9  215.23    3.07   0
  -6   2  12   11.40    1.80   0
  -6   2  13   46.16    2.21   0
  -5   1  17    6.53    1.95   0
  -4   0   5   -0.92    1.07   0
  -4   0  17    1.55    1.75   0
  -3  -1   7  433.68    2.60   0
  -3  -1   8   31.44    1.21   0
  -3  -1  13  894.13    4.41   0
  -3  -1  14   30.75    1.45   0
  -2   0  22    0.88    1.48   0
  -1  -1  18   12.81    1.17   0
  -5   1   4    8.63    1.20   0
  -4   0  18   85.04    2.45   0
  -3  -1  15  288.66    2.67   0
  -3  -1  16   77.77    1.83   0
  -1  -1  19   23.64    1.60   0
   1  -1  10  120.88    0.97   0
   1  -1  11    3.58    0.44   0
   1  -1  12  647.38    2.29   0
  -4   0  19   -0.34    1.80   0
  -3  -1  17    4.48    1.36   0
  -2   0  23   -0.86    1.46   0
  -4   0  20  927.05    5.82   0
  -3  -1  18  286.34    3.15   0
  -2   0  24  199.90    2.95   0
  -1  -1  20   31.52    1.46   0
  -8  -2  -4   11.71    1.96   0
  -8  -2  -3  124.37    2.31   0
  -7  -1   3   31.64    1.48   0
  -6  -4  -7  368.58    3.08   0
  -6  -4  -6  404.87    3.15   0
  -8   0   2   23.23    2.04   0
  -7  -3  -5  184.86    2.68   0
  -6  -4 -12   51.32    1.85   0
  -6  -4 -11  224.67    2.62   0
  -6  -4  -9   13.47    1.59   0
  -6  -4  -8  177.42    2.48   0
  -6  -2   2   86.54    1.68   0
  -5  -3   0   85.26    1.38   0
  -4  -4  -4   55.35    0.99   0
  -3  -1   5   28.87    0.64   0
  -8   0   1    0.91    1.94   0
  -7  -3 -14    6.85    2.25   0
  -7  -3  -7   25.18    1.90   0
  -7  -1   2  554.70    3.55   0
  -5  -1   5   51.55    1.08   0
  -4  -4  -6  192.43    1.70   0
  -4  -4  -5   91.05    1.29   0
  -4  -2   3   43.44    0.91   0
  -4   0   7   -0.03    0.55   0
  -7  -3 -13    2.26    1.80   0
  -7  -3  -9   19.01    1.92   0
  -7  -3  -8   46.74    2.19   0
  -6  -2   1  131.19    1.86   0
  -5  -3  -1 1299.38    4.27   0
  -4  -4  -7  539.22    2.70   0
  -8   0   0  566.26    4.17   0
  -7  -1   1   15.10    1.52   0
  -7   1   5   88.86    1.86   0
  -6  -2   0    1.45    1.13   0
  -4  -4 -13   60.36    1.47   0
  -4  -4 -12  146.98    1.79   0
  -4  -4 -11   72.15    1.30   0
  -4  -4 -10   11.23    0.99   0
  -4  -4  -9   96.03    1.42   0
  -4  -4  -8  243.55    1.99   0
  -3  -3  -2  239.42    1.49   0
  -7  -1   0   60.17    1.82   0
  -5  -3  -3   15.29    1.01   0
  -4  -2   2   67.40    1.05   0
  -3  -1   4   10.29    0.54   0
  -8   0  -2   58.84    2.15   0
  -7  -1  -1   64.37    1.90   0
  -7   1   4    8.04    1.47   0
  -6  -2  -1    5.74    1.24   0
  -4   0   6   50.82    0.84   0
  -3  -3  -3  605.80    2.27   0
  -8   0  -3    0.06    1.87   0
  -6  -2  -2    4.01    1.01   0
  -5  -1   3   16.93    0.89   0
  -5   1   7   35.29    0.96   0
  -8   0  -4  355.05    3.64   0
  -7  -1  -2  747.23    4.27   0
  -7   1   3   32.21    1.46   0
  -6  -2  -3  347.61    2.71   0
  -5  -3  -6   59.57    1.38   0
  -3  -3  -4   17.63    0.69   0
  -8   0  -6   13.92    2.04   0
  -8   0  -5    0.98    1.89   0
  -8   2   1  279.89    3.02   0
  -7  -1  -3   23.18    1.66   0
  -6  -2  -4   14.23    1.25   0
  -5  -3 -15    9.05    1.41   0
  -4  -2   0    1.18    0.70   0
  -3  -3  -5   43.36    0.82   0
  -8   0  -7   -0.06    1.96   0
  -7  -1  -5    5.52    1.69   0
  -7  -1  -4  390.60    3.33   0
  -7   1   2  551.74    3.45   0
  -6  -2 -16   69.82    2.06   0
  -6  -2  -5  162.07    2.08   0
  -5  -3 -13  124.58    1.88   0
  -5  -3 -12  292.03    2.52   0
  -5  -3 -11   87.57    1.68   0
  -5  -1   2  636.29    2.83   0
  -3  -3  -6    3.78    0.59   0
  -8   2   0   73.99    2.18   0
  -7  -1 -15    1.69    2.13   0
  -6  -2 -15  106.46    2.16   0
  -6  -2  -6    1.04    1.33   0
  -4  -2  -1    7.89    0.77   0
  -3  -3  -7  120.03    1.19   0
  -8   2  -1    2.16    1.69   0
  -7  -1 -14  138.38    2.64   0
  -7  -1 -13   65.99    2.34   0
  -7  -1 -12  491.86    4.08   0
  -7  -1 -10   89.31    2.43   0
  -7  -1  -8    5.90    1.76   0
  -7  -1  -7   -0.20    1.70   0
  -7   1   1   16.81    1.35   0
  -6  -2 -14    8.12    1.54   0
  -6  -2 -13  139.98    2.28   0
  -6  -2 -12   34.44    1.63   0
  -6  -2 -10   22.57    1.71   0
  -6  -2  -8    2.62    1.32   0
  -5  -1   1   13.07    0.84   0
  -3  -3  -9  249.20    1.67   0
  -3  -3  -8  204.60    1.47   0
  -7   1   0   61.36    1.65   0
  -5   1   5   49.98    1.13   0
  -4  -2  -2  215.60    1.63   0
  -4   0   4  442.07    1.95   0
  -3  -3 -12    3.93    0.74   0
  -3  -3 -11  111.89    1.24   0
  -3  -3 -10   11.29    0.75   0
  -3  -1   2  990.11    2.52   0
  -8   2  -3  129.88    2.55   0
  -5  -1   0  272.73    1.89   0
  -4  -2  -3   93.73    1.21   0
  -8   2  -4   11.87    1.80   0
  -7   1  -1   65.55    1.76   0
  -7   3   3   61.25    1.87   0
  -5  -1  -1  339.09    2.16   0
  -8   2  -6  105.56    2.53   0
  -8   2  -5   33.64    2.00   0
  -8   4   0   11.75    1.93   0
  -7   1  -2  704.94    4.03   0
  -5   1   4    7.49    0.77   0
  -4  -2  -4   39.88    0.96   0
  -8   4  -1    0.12    1.92   0
  -7   1  -3   22.20    1.59   0
  -7   3   2   31.23    1.59   0
  -6   0  -2  402.73    2.74   0
  -5  -1  -2  109.40    1.42   0
  -4  -2  -5  304.80    1.92   0
  -4   0   3   -0.29    0.55   0
  -7   1  -4  393.90    3.27   0
  -5  -1  -3   19.37    0.96   0
  -4  -2 -15  319.27    2.34   0
  -4  -2  -6   19.94    0.87   0
  -7   1  -6   10.96    1.62   0
  -7   1  -5    5.03    1.59   0
  -7   3   1  323.04    2.76   0
  -6   0 -18   57.18    1.98   0
  -6   0  -3   -0.22    0.95   0
  -4  -2 -14  298.16    2.21   0
  -4  -2 -13   26.37    1.24   0
  -4  -2  -8   54.38    1.06   0
  -4  -2  -7   65.95    1.10   0
  -4   0   2   61.82    0.89   0
  -3  -1   0    1.44    0.48   0
  -7   1 -15    0.75    1.85   0
  -7   1 -14  133.39    2.65   0
  -7   1 -13   62.78    2.33   0
  -7   1  -8    4.25    1.83   0
  -6   0 -17    2.16    1.47   0
  -6   0  -5    1.67    1.11   0
  -6   0  -4    3.72    0.98   0
  -5  -1 -16   12.67    1.49   0
  -5  -1  -5   61.45    1.24   0
  -4  -2 -12   13.50    0.94   0
  -4  -2 -11  938.54    3.51   0
  -4  -2  -9   91.05    1.29   0
  -4   2   6   13.07    0.70   0
  -7   1 -12  489.52    4.17   0
  -7   1 -11   69.62    2.32   0
  -7   1 -10   89.95    2.37   0
  -7   3   0  327.43    2.87   0
  -6   0 -16  246.81    2.76   0
  -6   0 -15    1.09    1.37   0
  -6   0  -6 1010.29    4.44   0
  -5  -1 -15    1.22    1.10   0
  -5  -1  -6   48.68    1.24   0
  -5   1   2  643.01    2.78   0
  -3  -1  -1  298.12    1.47   0
  -7   3  -1  175.37    2.34   0
  -6   0 -14  408.63    3.36   0
  -6   0 -13    1.53    1.52   0
  -6   0 -12    0.99    1.58   0
  -6   0  -9    1.12    1.41   0
  -6   0  -8  825.97    4.22   0
  -6   0  -7    1.39    1.33   0
  -5  -1 -14   70.07    1.56   0
  -5  -1 -12  769.80    3.87   0
  -5  -1  -7   30.55    1.10   0
  -4   0   1    0.06    0.56   0
  -7   3  -2   17.61    1.49   0
  -6   0 -11    1.11    1.50   0
  -6   0 -10  775.47    4.36   0
  -5   1   1   12.04    0.82   0
  -5   3   5   37.10    0.97   0
  -4   0   0 1565.38    3.75   0
  -3  -1  -2    7.02    0.54   0
  -2   0  25   -0.31    2.27   0
  -1  -3   9  603.26    2.88   0
  -1  -3  25   23.68    2.46   0
   0  -4  27  133.87    3.39   0
  -2  -2  15  254.97    2.69   0
  -2  -2  16  233.74    2.76   0
  -2  -2  17  584.73    4.32   0
  -2   0  26  148.52    3.21   0
  -1  -3  26    9.29    2.33   0
  -2  -2  14    0.81    1.07   0
  -2  -2  20  146.23    2.91   0
  -2  -2  21   73.77    2.55   0
  -2   0  27   -1.76    2.77   0
  -1  -3   8   21.07    0.89   0
  -1  -3  27   39.45    2.70   0
  -2  -2  13   41.26    1.35   0
  -2  -2  22   12.04    2.10   0
  -2  -2  23   -0.24    2.04   0
   0  -6  15  810.00    4.73   0
   0  -6  17  836.85    5.27   0
   0  -6  18  385.56    3.92   0
   0  -6  19    6.90    2.00   0
   0  -6  20    5.52    1.97   0
   0  -6  21    2.07    2.11   0
   1  -7  17  242.49    3.05   0
   1  -7  18    2.59    1.69   0
   1  -7  19  561.78    4.60   0
  -2  -2  12  145.45    1.81   0
  -2  -2  24   30.66    2.30   0
  -1  -5  18   17.02    1.84   0
   0  -6  13   18.69    1.23   0
   0  -6  14  275.69    2.79   0
   0  -6  22   -0.34    2.12   0
   1  -7  14  480.97    3.51   0
   1  -7  20  617.95    4.96   0
   1  -7  21    1.45    1.92   0
   1  -7  22  163.74    3.18   0
  -2  -2  11  201.35    1.93   0
  -2  -2  25  200.75    3.36   0
  -1  -5  15  282.96    2.87   0
  -1  -5  19  156.15    2.59   0
  -1  -5  20   18.27    1.90   0
  -1  -5  21   24.24    2.36   0
  -1  -5  22  107.04    2.91   0
   0  -6  23  208.95    3.51   0
   0  -6  24   49.53    2.55   0
   1  -7  13  243.80    2.49   0
   1  -7  23    0.58    1.91   0
  -2  -2  26  129.79    3.13   0
  -1  -5  13   23.22    1.26   0
  -1  -5  14  288.84    2.74   0
  -1  -5  23   22.11    2.39   0
   0  -6  25   55.65    2.71   0
   1  -7  12   82.61    1.57   0
   1  -7  24  283.21    3.90   0
  -3   1  14   29.71    1.22   0
  -2  -2  10   13.12    0.90   0
  -2  -2  27   86.03    2.92   0
  -1  -5  12   11.32    1.10   0
  -1  -5  24   72.72    2.77   0
  -1  -5  25  542.19    5.11   0
   1  -7  11  130.49    1.74   0
  -2  -4  18  151.08    2.65   0
  -2  -4  19    7.51    2.03   0
  -2  -4  20  140.25    2.97   0
  -2  -4  21   89.32    2.78   0
  -1  -5  26    1.69    2.31   0
   0  -6  10  139.03    1.69   0
  -3  -1  17    4.44    1.45   0
  -3  -1  19   65.56    2.28   0
  -3  -1  20   81.97    2.41   0
  -3  -1  22  155.98    3.26   0
  -2  -4  15    7.87    1.29   0
  -2  -4  22   14.27    2.22   0
  -2  -4  23    1.31    2.09   0
  -2  -2   9  543.21    2.63   0
  -1  -5  11   66.54    1.43   0
   1  -7  10   93.96    1.49   0
  -3  -1  15  284.20    2.65   0
  -3  -1  16   73.59    1.89   0
  -3  -1  23   86.44    2.95   0
  -3   1  12   42.74    1.06   0
  -2  -4  14   35.85    1.50   0
  -2  -4  24    0.45    2.17   0
  -2  -4  25  181.10    3.41   0
  -1  -5  10  206.51    1.97   0
   0  -6   9  119.18    1.50   0
  -3  -1  14   29.02    1.21   0
  -3  -1  24   13.28    2.10   0
  -3  -1  25    4.88    2.07   0
  -2  -4  13   38.71    1.37   0
  -2  -4  26  136.05    3.17   0
  -2  -2   8    0.50    0.68   0
   1  -7   9  122.25    1.55   0
  -3  -1  13  896.99    4.00   0
  -3  -1  26  104.53    3.01   0
  -3   1  11   22.38    0.83   0
  -2  -4  12  343.30    2.64   0
  -1  -5   9 1008.25    3.78   0
   0  -6   8  133.43    1.45   0
  -1  -7  20  316.48    3.99   0
   0  -8  18 1179.01    6.24   0
   0  -8  19   54.64    2.22   0
   0  -8  20  114.14    2.70   0
   0  -8  21   26.09    2.20   0
   1  -7   8    1.03    0.90   0
  -3  -3  18   36.32    2.17   0
  -3  -3  19    0.19    2.03   0
  -3  -3  20  122.36    2.93   0
  -3  -3  21   88.93    2.74   0
  -3  -3  22   20.56    2.16   0
  -3  -3  23  282.78    3.71   0
  -3  -1  12   43.66    1.14   0
  -3   1  10   79.86    1.04   0
  -2  -4  11  602.99    3.17   0
  -2  -2   7   19.47    0.77   0
  -1  -7  16  110.92    2.41   0
  -1  -7  17   -2.17    1.78   0
  -1  -7  18   48.68    2.23   0
  -1  -7  21    8.31    2.30   0
  -1  -7  22  149.17    3.23   0
  -1  -7  23   19.35    2.27   0
   0  -8  16  538.40    4.05   0
   0  -8  22    2.19    2.13   0
   0  -8  23   22.86    2.36   0
  -3  -3  24    4.31    2.22   0
  -3  -3  25    5.13    2.24   0
  -3  -1  11   22.82    0.92   0
  -2  -4  10  401.31    2.58   0
  -1  -7  15  470.80    3.79   0
  -1  -7  24   96.76    2.94   0
  -1  -5   8   33.98    0.83   0
   0  -8  15  602.17    4.08   0
   0  -6   7  383.54    2.16   0
  -3  -3  15   53.16    1.75   0
  -3  -3  26    8.16    2.46   0
  -2  -6  17  485.49    4.14   0
  -2  -6  18   43.60    2.14   0
  -2  -6  19   91.67    2.68   0
  -2  -6  20    5.12    2.25   0
  -2  -6  21    5.92    2.38   0
  -2  -6  22   48.65    2.65   0
  -2  -6  23   50.08    2.59   0
  -3  -3  14  207.86    2.32   0
  -2  -6  16    4.51    1.50   0
  -2  -6  24   10.62    1.80   0
  -2  -4   9    5.16    0.89   0
  -1  -7  13   29.68    1.47   0
  -1  -5   7 1831.21    4.59   0
  -3  -3  13 1532.36    5.42   0
  -3  -1  10   80.28    1.21   0
  -2  -6  15   41.01    1.35   0
  -1  -7  12   49.23    1.48   0
   0  -8  12   74.36    1.58   0
   0  -6   6   17.78    0.70   0
  -3  -3  12  242.93    2.22   0
  -2  -6  13    4.94    1.06   0
   0  -8  11    1.54    1.25   0
  -3  -5  18    4.29    1.90   0
  -3  -5  19    4.77    2.06   0
  -3  -5  20    1.30    2.17   0
  -3  -5  21   41.39    2.60   0
  -3  -5  22   32.46    2.48   0
  -3  -5  23    6.11    2.11   0
  -3  -5  24   73.41    2.79   0
  -3  -1   9  244.27    1.78   0
  -2  -4   8    7.48    0.87   0
  -1  -7  11   14.24    1.12   0
  -1  -5   6   15.58    0.76   0
  -3  -5  16   40.42    1.98   0
  -3  -5  17  102.17    2.45   0
  -3  -3  11  154.29    1.77   0
  -2  -6  12  706.19    3.84   0
  -1  -7  10   91.16    1.51   0
   0  -8  10  243.86    2.17   0
  -3  -5  15  196.78    2.54   0
  -2  -6  11  131.21    1.80   0
  -2  -4   7  412.47    2.30   0
   0  -6   5  545.20    2.31   0
  -3  -3  10  223.05    1.99   0
  -3  -1   8   32.37    0.83   0
  -1  -9  18  234.54    3.23   0
  -1  -9  19    5.51    1.93   0
  -1  -9  20   39.88    2.52   0
  -1  -9  21   31.31    2.44   0
  -1  -7   9   60.20    1.27   0
   0  -8   9    6.19    0.90   0
  -2  -8  18  584.40    4.78   0
  -2  -8  19    6.86    2.18   0
  -2  -8  20   94.49    2.85   0
  -2  -8  21   30.58    2.48   0
  -2  -8  22    4.60    2.36   0
  -2  -6  10   18.68    1.06   0
  -1  -9  16  122.29    2.41   0
  -1  -9  17   20.23    1.85   0
  -1  -5   5   86.39    1.08   0
   0 -10  19   82.83    2.58   0
   0 -10  20   29.40    2.35   0
  -4  -4  21   17.71    2.22   0
  -4  -4  22   15.95    2.41   0
  -4  -2  14  149.96    2.24   0
  -3  -5  12    8.23    1.04   0
  -3  -3   9  909.67    3.60   0
  -2  -8  16  229.84    3.11   0
  -2  -8  17  163.96    2.88   0
  -1  -9  15   89.92    2.13   0
  -4  -4  18  273.00    3.40   0
  -4  -4  19    5.23    1.84   0
  -4  -4  20    8.89    1.96   0
  -4  -4  23    5.69    2.27   0
  -3  -7  20  290.43    3.99   0
  -3  -7  21   50.43    2.74   0
  -3  -7  22   10.57    2.37   0
  -2  -8  15   20.91    1.84   0
  -2  -6   9   14.65    0.99   0
  -2  -4   6   20.95    0.85   0
  -1  -9  14  191.38    2.60   0
  -1  -7   8   82.39    1.36   0
   0  -8   8  197.40    1.83   0
   0  -6   4    4.75    0.66   0
  -4  -4  16  385.17    3.60   0
  -4  -4  17   33.72    1.99   0
  -4  -2  13  210.75    2.22   0
  -3  -7  17  124.68    2.72   0
  -3  -7  18   71.12    2.64   0
  -3  -7  19    0.45    1.58   0
  -3  -5  11  280.78    2.48   0
  -3  -3   8  125.90    1.48   0
  -3  -1   7  420.72    2.08   0
  -2  -8  14   11.30    1.50   0
  -1  -9  13  132.49    2.23   0
  -4  -4  15   41.31    1.94   0
  -4  -2  12  175.30    2.00   0
  -3  -7  16  142.67    2.70   0
  -2  -8  13  176.47    2.57   0
  -2  -6   8  100.31    1.49   0
  -1  -7   7   33.14    1.03   0
  -1  -5   4   93.70    1.08   0
  -4   0  11    0.54    0.75   0
  -3  -7  15  113.26    2.42   0
  -2  -8  12  261.65    2.75   0
  -2  -4   5  264.90    1.75   0
  -1  -9  12  191.67    2.41   0
   0  -8   7    7.23    0.82   0
  -4  -6  21   17.14    2.48   0
  -4  -2  11  520.87    3.02   0
  -3  -7  14  667.65    4.43   0
  -3  -3   7  137.67    1.47   0
  -4  -6  18  103.63    2.70   0
  -4  -6  19   85.69    2.70   0
  -4  -6  20    0.23    2.06   0
  -3  -7  13   94.73    2.04   0
  -3  -5   9  699.80    3.49   0
  -3  -1   6  192.19    1.40   0
  -2  -6   7 1257.37    4.27   0
  -1  -7   6  997.49    3.63   0
  -4  -6  17    5.11    1.90   0
  -4  -2  10   18.51    0.95   0
  -3  -7  12   36.65    1.48   0
   0  -8   6   32.53    0.98   0
  -5  -3  20   99.29    3.17   0
  -4  -6  15  100.13    2.41   0
  -4  -6  16   60.93    2.26   0
  -3  -5   8  148.81    1.78   0
  -3  -3   6  394.04    2.22   0
  -2 -10  18  100.70    2.82   0
  -2  -6   6   37.09    1.06   0
  -2  -4   4  149.47    1.35   0
  -1  -5   3  438.64    1.98   0
  -5  -3  18   34.17    2.18   0
  -5  -3  19  109.63    2.75   0
  -4  -6  14   -0.93    1.70   0
  -4  -4  11   85.11    1.80   0
  -4   0   9    0.46    0.85   0
  -3  -9  18   81.18    2.70   0
  -3  -9  19   17.28    2.38   0
  -3  -7  11   17.86    1.32   0
  -2 -10  16   44.38    2.12   0
  -2 -10  17   59.64    2.39   0
  -1  -9   9   15.18    1.15   0
  -1  -7   5  240.73    1.84   0
  -5  -3  17   33.65    2.26   0
  -4  -4  10  210.42    2.20   0
  -4  -2   9  296.30    2.20   0
  -3  -9  17    8.74    1.97   0
  -3  -5   7    2.57    0.94   0
  -2 -10  15  156.24    2.71   0
   0  -8   5   61.44    1.10   0
  -5  -3  16  285.94    3.25   0
  -4  -6  13   38.68    1.38   0
  -3  -9  15   14.84    2.14   0
  -3  -9  16  184.46    2.88   0
  -2 -10  14    6.72    1.63   0
  -2  -6   5  544.54    2.75   0
  -1 -11  15    0.36    1.82   0
  -1  -9   8    9.54    1.11   0
  -5  -5  18   -3.89    2.43   0
  -5  -5  19    7.66    1.99   0
  -5  -5  20    4.93    2.44   0
  -5  -3  15  315.10    3.25   0
  -4  -8  18  184.31    3.34   0
  -4  -8  19    2.81    2.26   0
  -4  -6  12  182.18    2.49   0
  -4  -2   8   80.43    1.32   0
  -3  -9  14  288.96    3.45   0
  -3  -3   5    4.90    0.72   0
  -2 -10  13   20.57    1.72   0
  -2  -8   8  181.23    2.09   0
  -1 -11  14    3.41    1.70   0
  -5  -5  17   49.63    2.20   0
  -5  -3  14  385.18    3.34   0
  -4  -8  17    1.85    2.04   0
  -4  -6  11    6.58    1.31   0
  -4  -4   9   80.35    1.32   0
  -4   0   8 1743.37    4.38   0
  -3  -9  13  257.48    3.20   0
  -3  -5   6    5.21    0.93   0
  -2 -10  12   21.76    1.62   0
  -2  -4   3   13.58    0.70   0
  -1 -11  13   20.89    1.79   0
  -1  -7   4   82.66    1.18   0
  -5  -5  16   52.51    2.07   0
  -5  -3  13  406.48    3.33   0
  -4  -8  15  116.24    2.67   0
  -4  -8  16  270.57    3.38   0
  -3  -7   8  304.89    2.56   0
  -2  -8   7   14.06    1.15   0
  -1  -9   7    6.33    1.08   0
   0  -8   4  359.12    2.08   0
  -5  -5  15    6.05    1.68   0
  -4  -8  14   86.92    2.54   0
  -4  -6  10  151.53    2.13   0
  -4  -2   7   95.72    1.32   0
  -3  -9  12  108.01    2.39   0
  -2 -10  11  106.95    2.18   0
  -2  -6   4  674.13    2.98   0
  -5  -5  14    6.62    1.63   0
  -4  -8  13    8.36    2.10   0
  -4   0   7   -0.76    0.75   0
  -3  -9  11   21.48    1.80   0
  -3  -7   7   16.53    1.07   0
  -3  -5   5 1252.22    4.22   0
  -3  -3   4  249.30    1.75   0
  -2  -8   6    2.32    0.99   0
  -1  -9   6  316.57    2.42   0
  -5  -7  17   45.72    2.42   0
  -5  -7  18    8.15    2.24   0
  -5  -5  13  161.56    2.64   0
  -4  -4   7   16.32    0.99   0
  -2 -10  10    2.27    1.43   0
  -1  -7   3  468.92    2.35   0
  -5  -7  16  209.19    3.31   0
  -4  -8  12  442.72    3.75   0
  -3  -9  10  123.39    2.12   0
  -2 -10   9  265.32    2.80   0
  -5  -7  15   39.54    2.20   0
  -4  -8  11   48.55    2.00   0
  -4  -2   6   13.27    0.82   0
  -3  -9   9    8.37    1.59   0
  -3  -7   6  631.37    3.43   0
  -3  -5   4  126.24    1.56   0
  -2  -8   5    7.39    1.15   0
  -2  -6   3 1171.29    3.76   0
  -1  -9   5  416.98    2.66   0
  -5  -7  14  865.69    5.60   0
  -5  -5  11   77.38    1.97   0
  -4  -8  10  115.64    2.37   0
  -4  -4   6   57.48    1.26   0
  -3 -11  14   59.91    2.44   0
  -3  -3   3   32.23    0.88   0
  -2 -10   8   78.90    1.86   0
  -5  -7  13   58.17    2.37   0
  -5  -5  10    0.88    1.55   0
  -5  -3   9  196.51    2.16   0
  -4   0   6   51.33    0.88   0
  -3 -11  13   23.25    2.09   0
  -3  -9   8   54.58    1.86   0
  -3  -7   5 1345.41    4.86   0
  -2 -12  14   52.00    2.50   0
  -1  -7   2   62.06    1.01   0
  -6  -4  16   31.11    2.31   0
  -5  -7  12   24.47    1.95   0
  -4 -10  14  181.41    3.26   0
  -4  -8   9  114.99    2.34   0
  -4  -2   5   43.27    0.99   0
  -2 -12  13   25.09    2.12   0
  -2 -10   7  104.51    1.96   0
  -2  -8   4  465.71    2.86   0
  -2  -6   2  155.53    1.53   0
  -1  -9   4   16.53    0.93   0
  -6  -4  15    0.72    1.77   0
  -5  -7  11   63.70    2.26   0
  -5  -5   9   17.74    1.65   0
  -4 -10  13   62.60    2.42   0
  -4  -4   5   70.04    1.32   0
  -3 -11  12    7.64    1.89   0
  -3  -9   7   41.87    1.77   0
  -3  -5   3  137.80    1.64   0
  -2 -12  12   18.53    2.19   0
  -2  -4   1   56.97    0.93   0
  -6  -4  14  279.72    3.47   0
  -5  -3   8   13.95    1.11   0
  -4 -10  12   80.23    2.48   0
  -4  -8   8  280.31    3.03   0
  -3 -11  11   15.08    1.91   0
  -3  -7   4  146.09    1.82   0
  -2 -12  11   81.56    2.72   0
  -6  -6  15   25.90    2.18   0
  -5  -7  10   26.45    1.96   0
  -5  -5   8   20.16    1.58   0
  -4 -10  11   84.29    2.47   0
  -4   0   5   -0.82    0.48   0
  -3 -11  10   59.32    2.14   0
  -3  -9   6  370.50    3.19   0
  -3  -3   2   24.51    0.68   0
  -2 -10   6   30.49    1.47   0
  -2  -8   3  346.57    2.48   0
  -6  -4  12  356.90    3.79   0
  -5  -9  13   17.92    2.15   0
  -5  -3   7  248.09    2.30   0
  -4  -6   5   31.99    1.24   0
  -4  -2   4    5.69    0.72   0
  -2 -12  10  112.09    2.59   0
  -1  -7   1   74.48    1.05   0
  -6  -6  13   98.56    2.61   0
  -5  -9  12   76.58    2.65   0
  -5  -7   9   22.62    1.54   0
  -5  -5   7   61.16    1.70   0
  -5  -1   7   35.08    1.24   0
  -4 -10  10   10.86    1.93   0
  -3 -11   9   -1.23    1.62   0
  -3  -9   5   11.32    1.51   0
  -3  -7   3  213.82    2.11   0
  -2 -10   5   17.56    1.35   0
  -6  -6  12  171.92    2.96   0
  -6  -4  11   94.40    2.27   0
  -5  -9  11   26.16    2.10   0
  -5  -7   8  134.23    2.52   0
  -5  -3   6  604.33    3.50   0
  -4 -10   9   76.59    2.46   0
  -4  -8   6   57.32    1.94   0
  -4  -6   4   58.55    1.40   0
  -2  -8   2  407.28    2.65   0
  -2  -4   0   62.46    0.96   0
  -6  -4  10  106.75    2.59   0
  -4  -4   3  297.85    2.24   0
  -3 -11   8  123.80    2.42   0
  -3  -3   1   49.38    0.96   0
  -6  -6  11   54.80    2.14   0
  -5  -9  10   40.67    2.18   0
  -5  -7   7   93.46    2.32   0
  -4 -10   8   -0.38    1.85   0
  -4  -8   5   31.09    1.74   0
  -4  -2   3   42.58    0.97   0
  -4   0   4  436.68    2.05   0
  -3 -11   7    5.00    1.56   0
  -3  -9   4   73.06    1.79   0
  -3  -7   2   11.45    0.98   0
  -3  -5   1   41.64    1.10   0
  -1  -7   0   20.60    0.84   0
  -6  -6  10   21.48    1.82   0
  -6  -4   9  102.30    2.13   0
  -5  -9   9   12.30    2.03   0
  -5  -3   5   36.53    1.29   0
  -5  -1   6    8.45    0.91   0
  -4 -10   7   42.89    2.09   0
  -4  -6   3  434.50    2.94   0
  -2  -6   0    1.09    0.70   0
  -5  -7   6  700.36    4.48   0
  -4  -8   4  365.68    3.20   0
  -4  -4   2   75.70    1.35   0
  -3 -11   6  149.17    2.46   0
  -3  -9   3  383.53    3.15   0
  -2  -8   1  105.06    1.54   0
  -6  -6   9  107.38    2.45   0
  -6  -4   8   85.80    2.12   0
  -5  -9   8    8.40    1.97   0
  -4 -10   6   20.89    1.95   0
  -3  -7   1  227.01    2.10   0
  -2  -4  -1   19.15    0.74   0
  -1  -9   1  164.88    1.71   0
  -6  -8  10  113.17    2.90   0
  -5  -9   7    3.68    1.93   0
  -5  -7   5  311.80    3.15   0
  -5  -3   4  135.59    1.79   0
  -5  -1   5   50.25    1.17   0
  -4  -6   2   13.05    1.13   0
  -4  -2   2   69.56    1.13   0
  -3 -11   5  129.48    2.38   0
  -3  -3   0    3.70    0.69   0
  -6  -4   7   80.41    2.00   0
  -4 -10   5   66.58    2.23   0
  -4  -8   3  367.44    3.21   0
  -4   0   3    0.19    0.47   0
  -3  -9   2    5.67    1.54   0
  -2  -8   0  116.12    1.60   0
  -2  -6  -1  335.89    2.09   0
  -1  -7  -1    4.40    0.62   0
  -6  -8   9   76.20    2.58   0
  -6  -6   7   73.88    2.23   0
  -5  -9   6  329.97    3.77   0
  -5  -7   4  435.69    3.56   0
  -6  -8   8  293.09    3.70   0
  -6  -4   6  200.24    2.56   0
  -5  -3   3  467.80    2.95   0
  -5  -1   4    8.02    0.84   0
  -4 -10   4  119.18    2.50   0
  -4  -8   2  648.10    4.06   0
  -4  -6   1  366.74    2.73   0
  -3 -11   4  209.87    2.79   0
  -3  -7   0    8.58    0.75   0
  -1  -9   0    0.61    0.77   0
  -6  -6   6   44.14    2.01   0
  -5  -9   5  117.06    2.69   0
  -5  -7   3   23.95    1.74   0
  -4 -12   7  148.85    2.99   0
  -4  -2   1  346.44    2.13   0
  -3  -5  -1    2.51    0.89   0
  -7  -5  10   24.84    2.38   0
  -6  -8   7   -1.93    1.96   0
  -6  -4   5   33.64    1.68   0
  -4 -10   3   23.92    1.88   0
  -4  -4   0  452.52    2.74   0
  -3 -11   3  204.32    2.79   0
  -3  -3  -1  248.31    1.74   0
  -2  -8  -1    3.31    0.90   0
  -2  -4  -2  447.64    2.11   0
  -7  -5   9   76.63    2.88   0
  -6  -6   5   49.36    2.01   0
  -5  -9   4  287.65    3.47   0
  -5  -3   2   49.01    1.32   0
  -4 -12   6    1.65    2.01   0
  -4  -8   1   32.15    1.51   0
  -4  -6   0   74.22    1.50   0
  -4   0   2   62.11    0.89   0
  -3  -7  -1   67.87    1.43   0
  -2  -6  -2  153.55    1.53   0
  -5  -7   2    0.93    1.41   0
  -3 -11   2   48.32    1.87   0
  -1  -9  -1  110.62    1.59   0
  -7  -5   8   35.90    2.37   0
  -6  -6   4  210.39    2.94   0
  -6  -4   4  112.36    2.12   0
  -5  -9   3  225.47    3.22   0
  -4 -12   5    5.28    1.91   0
  -4 -10   2   31.32    1.88   0
  -4  -8   0  111.82    2.13   0
  -4  -2   0    0.74    0.75   0
  -3  -5  -2  367.62    2.39   0
  -5 -11   5  160.32    3.06   0
  -5  -7   1   17.18    1.63   0
  -4  -6  -1  239.50    2.36   0
  -4  -4  -1   17.50    1.04   0
  -3  -7  -2   36.39    1.26   0
  -2  -8  -2    7.98    0.94   0
  -7  -5   7    1.78    1.90   0
  -6  -6   3   39.21    1.99   0
  -6  -2   4   68.45    1.82   0
  -5  -9   2    0.77    2.06   0
  -5  -1   2  632.22    3.15   0
  -4 -12   4    8.87    1.90   0
  -4 -10   1  262.29    3.19   0
  -3 -11   1   40.06    1.83   0
  -3  -3  -2  248.80    1.78   0
  -2  -6  -3  213.95    1.78   0
  -7  -5   6   61.00    2.36   0
  -5 -11   4    6.81    2.00   0
  -4  -8  -1  123.16    2.08   0
  -2  -4  -3   81.88    0.99   0
  -1  -7  -3  107.72    1.35   0
  -7  -7   6  551.93    4.94   0
  -6  -8   3    6.20    2.11   0
  -6  -6   2    4.41    1.73   0
  -5  -9   1   18.31    2.04   0
  -5  -7   0  135.01    2.43   0
  -4 -12   3   11.43    1.91   0
  -4  -6  -2   18.26    1.28   0
  -4  -2  -1    8.50    0.83   0
  -3 -11   0   57.30    2.23   0
  -3  -5  -3   13.20    0.98   0
  -1  -9  -2  230.46    1.99   0
  -7  -5   5   32.63    2.22   0
  -6  -4   2  614.48    4.03   0
  -6  -2   3   92.04    1.86   0
  -5 -11   3  215.16    3.39   0
  -5  -3   0   84.13    1.55   0
  -4 -10   0   17.37    1.83   0
  -4  -4  -2   14.86    1.04   0
  -3  -7  -3   14.07    1.05   0
  -2  -8  -3   26.82    1.11   0
  -7  -7   5  128.86    3.03   0
  -6  -8   2  610.92    4.89   0
  -5  -9   0  329.86    3.65   0
  -5  -7  -1   14.53    1.79   0
  -5  -1   1   12.98    0.92   0
  -4 -12   2  103.44    2.52   0
  -4  -8  -2   42.02    1.79   0
  -3  -3  -3  638.07    2.77   0
  -7  -5   4    2.39    2.01   0
  -6  -6   1   26.64    2.01   0
  -6  -4   1   58.30    1.88   0
  -5 -11   2  102.06    2.78   0
  -4 -10  -1  360.34    3.57   0
  -4  -6  -3   96.39    1.68   0
  -3 -11  -1   29.08    1.75   0
  -2  -6  -4   -0.72    0.76   0
  -7  -7   4  222.41    3.55   0
  -6  -8   1  258.85    3.49   0
  -6  -2   2   85.04    1.87   0
  -5  -3  -1 1314.58    4.96   0
  -4 -12   1   -3.66    1.90   0
  -4  -4  -3  540.40    3.08   0
  -4  -2  -2  182.57    1.74   0
  -4   0   0 1554.41    3.95   0
  -3  -5  -4  107.94    1.54   0
  -2  -4  -4   31.34    0.88   0
  -7  -7   3    3.65    2.24   0
  -6  -6   0   37.21    2.00   0
  -5 -11   1    3.41    2.06   0
  -5  -9  -1  264.00    3.39   0
  -5  -7  -2  151.87    2.58   0
  -4  -8  -3   37.21    1.67   0
  -3  -7  -4   60.23    1.44   0
  -2  -8  -4  119.97    1.66   0
  -1  -7  -4  128.15    1.38   0
  -6  -8   0   35.03    2.22   0
  -6  -4   0   78.26    1.97   0
  -5  -1   0  272.94    2.17   0
  -4 -12   0  103.76    2.73   0
  -4 -10  -2    1.58    1.73   0
  -3 -11  -2  232.62    2.91   0
  -7  -7   2   78.54    2.76   0
  -7  -5   2    3.28    1.90   0
  -6  -6  -1  132.74    2.67   0
  -6  -2   1  130.46    2.01   0
  -5 -11   0    1.45    2.03   0
  -5  -9  -2   63.06    2.37   0
  -5  -3  -2   50.14    1.45   0
  -4  -6  -4  185.26    2.16   0
  -3  -9  -4  438.58    3.38   0
  -3  -3  -4   17.22    0.87   0
  -2  -6  -5  150.93    1.62   0
  -6  -8  -1    8.31    2.09   0
  -6  -4  -1  106.23    2.07   0
  -5  -7  -3  114.09    2.30   0
  -4 -12  -1   67.12    2.61   0
  -4 -10  -3    9.02    1.77   0
  -4  -8  -4    8.15    1.63   0
  -4  -4  -4   52.92    1.34   0
  -3  -7  -5  453.17    3.05   0
  -3  -5  -5 1397.06    4.68   0
  -5 -11  -1   19.84    2.16   0
  -5  -1  -1  330.29    2.50   0
  -4  -2  -3   94.46    1.39   0
  -4   0  -1    0.05    0.56   0
  -3 -11  -3  378.42    3.58   0
  -2  -8  -5   24.42    1.09   0
  -6  -6  -2   -0.15    1.80   0
  -5  -9  -3  132.84    2.78   0
  -5  -7  -4   19.09    1.87   0
  -5  -3  -3   14.69    1.36   0
  -4  -6  -5    3.48    1.05   0
  -3  -9  -5   34.71    1.75   0
  -1  -7  -5   97.71    1.31   0
  -1  -5  -5   29.60    0.80   0
  -7  -7   0  387.27    4.38   0
  -6  -8  -2   19.00    1.66   0
  -6  -4  -2  165.00    2.53   0
  -5 -11  -2   61.90    2.68   0
  -4 -12  -2    2.62    2.25   0
  -4 -10  -4    5.73    1.83   0
  -4  -8  -5   47.61    1.80   0
  -6  -6  -3  147.89    2.78   0
  -5  -9  -4   43.54    2.27   0
  -4  -4  -5   92.19    1.43   0
  -3 -11  -4   10.34    1.84   0
  -3  -5  -6   13.86    1.06   0
  -3  -3  -5   45.90    0.94   0
  -2  -6  -6  153.67    1.67   0
  -7  -7  -1   19.87    2.36   0
  -6  -8  -3   27.45    2.23   0
  -5 -11  -3   32.75    2.35   0
  -5  -7  -5  605.81    4.46   0
  -5  -1  -2  108.00    1.60   0
  -4 -12  -3  219.31    3.58   0
  -4  -2  -4   38.36    1.09   0
  -2  -8  -6   97.50    1.68   0
  -7  -5  -1   11.70    1.99   0
  -6  -4  -3  413.68    3.60   0
  -5  -5  -5 1253.41    5.58   0
  -5  -3  -4    3.77    1.15   0
  -4 -10  -5  193.33    2.98   0
  -4  -8  -6   63.42    2.16   0
  -4   0  -2   99.77    1.22   0
  -3 -11  -5  175.68    3.10   0
  -3  -9  -6    4.64    1.50   0
  -2  -4  -6    7.16    0.80   0
  -1  -7  -6  287.98    2.09   0
  -7  -7  -2   98.33    2.88   0
  -6  -8  -4    0.89    2.04   0
  -6  -6  -4    3.03    1.84   0
  -5  -9  -5   24.74    2.25   0
  -4  -4  -6  195.53    2.18   0
  -3  -7  -7  190.38    2.22   0
  -3  -1  -4  437.42    2.19   0
  -1  -5  -6  120.89    1.35   0
  -7  -5  -2  197.39    3.27   0
  -6  -4  -4   41.52    1.93   0
  -5 -11  -4   63.61    2.65   0
  -5  -7  -6    7.14    1.85   0
  -4 -12  -4  118.32    3.03   0
  -4 -10  -6   23.35    1.99   0
  -3  -5  -7  398.57    2.77   0
  -2  -8  -7   10.58    1.13   0
  -2  -6  -7  133.44    1.63   0
  -7  -7  -3  225.35    3.65   0
  -7  -3  -1  176.87    2.85   0
  -6  -6  -5  471.88    4.22   0
  -5  -9  -6   16.59    2.25   0
  -5  -5  -6    1.29    1.59   0
  -5  -3  -5  209.67    2.36   0
  -5  -1  -3   18.47    1.16   0
  -4  -8  -7    3.28    1.74   0
  -3 -11  -6    0.52    2.19   0
  -7  -5  -3  129.27    2.90   0
  -6  -8  -5   23.21    1.87   0
  -5 -11  -5   38.03    2.50   0
  -4 -12  -5    7.89    2.44   0
  -4   0  -3    0.63    0.65   0
  -7  -3  -2   19.97    2.15   0
  -6  -4  -5   83.99    2.24   0
  -5  -7  -7   10.08    1.92   0
  -4 -10  -7  197.34    3.08   0
  -4  -4  -7  523.34    3.36   0
  -3  -7  -8    3.25    1.26   0
  -2 -10  -7  330.19    3.18   0
  -2  -4  -7  492.63    2.59   0
  -1  -7  -7  140.87    1.61   0
  -7  -7  -4   11.70    2.26   0
  -6  -8  -6   84.99    2.74   0
  -6  -6  -6   10.23    2.03   0
  -5  -9  -7   20.30    2.33   0
  -5  -5  -7   72.49    1.98   0
  -5  -3  -6   57.65    1.70   0
  -5  -1  -4 1433.98    5.17   0
  -4  -8  -8   22.32    1.75   0
  -4  -2  -6   20.26    1.05   0
  -3 -11  -7   21.09    2.01   0
  -3  -9  -8   11.40    1.61   0
  -3  -5  -8    7.22    1.06   0
  -3  -3  -7  126.13    1.61   0
  -3  -1  -5    3.25    0.71   0
  -2  -8  -8  132.20    1.99   0
  -2  -6  -8    4.63    0.95   0
  -7  -5  -4    5.41    2.03   0
  -7  -3  -3   92.60    2.89   0
  -5  -7  -8    8.41    1.94   0
  -4 -12  -6   55.49    2.92   0
  -1  -5  -7  234.87    1.76   0
  -7  -7  -5  415.00    4.56   0
  -6  -8  -7   51.50    2.56   0
  -6  -6  -7  810.29    5.53   0
  -6  -4  -6  421.61    3.84   0
  -5  -9  -8    6.61    2.27   0
  -4 -10  -8   43.48    2.14   0
  -4  -4  -8  235.92    2.46   0
  -7  -5  -5  394.47    4.27   0
  -5  -5  -8   27.49    1.94   0
  -5  -3  -7   72.11    1.82   0
  -4 -12  -7  187.51    3.66   0
  -4  -8  -9    8.08    1.87   0
  -4  -6  -9  406.77    3.49   0
  -4   0  -4    2.68    0.73   0
  -3 -11  -8  148.10    2.82   0
  -3  -9  -9    3.01    1.55   0
  -3  -5  -9   62.65    1.47   0
  -2  -4  -8  295.42    2.17   0
  -1  -7  -8    1.55    1.08   0
  -7  -7  -6    8.41    2.27   0
  -7  -3  -4   19.78    2.09   0
  -5  -7  -9  392.28    4.01   0
  -5  -1  -5   60.52    1.51   0
  -4  -2  -7   68.30    1.41   0
  -3  -3  -8  211.73    2.06   0
  -3  -1  -6  716.16    3.02   0
  -2  -8  -9   13.06    1.29   0
  -2  -6  -9  283.75    2.41   0
  -7  -5  -6    2.96    2.15   0
  -6  -8  -8  208.68    3.64   0
  -6  -6  -8   -2.90    2.08   0
  -6  -4  -7  378.27    3.80   0
  -5  -9  -9   18.32    2.30   0
  -5  -5  -9  654.04    4.61   0
  -4 -10  -9   66.57    2.36   0
  -4  -4  -9   92.79    1.77   0
  -7  -3  -5  179.37    3.19   0
  -4  -8 -10  116.01    2.63   0
  -4  -6 -10    2.80    1.36   0
  -3 -11  -9   16.69    2.05   0
  -3  -9 -10    1.65    1.59   0
  -2  -2  -7    8.02    0.78   0
  -1  -5  -8   15.59    0.85   0
  -6  -8  -9   -5.11    2.39   0
  -6  -6  -9    6.15    2.24   0
  -6  -4  -8  171.92    2.96   0
  -6  -2  -6    1.44    1.58   0
  -5  -7 -10   47.66    2.41   0
  -5  -1  -6   49.51    1.48   0
  -4 -10 -10   27.15    2.10   0
  -4   0  -5    0.71    0.75   0
  -3  -5 -10    6.38    1.12   0
  -2  -8 -10   74.49    1.79   0
  -2  -4  -9  253.93    2.14   0
  -7  -5  -7   39.95    2.54   0
  -5  -9 -10  144.33    3.15   0
  -4  -2  -8   55.97    1.40   0
  -3  -3  -9  246.22    2.29   0
  -2  -6 -10   29.66    1.19   0
  -1  -7  -9  123.47    1.67   0
  -7  -3  -6   44.47    2.34   0
  -6  -2  -7    8.23    1.93   0
  -4  -8 -11   53.26    2.32   0
  -4  -6 -11   60.27    2.14   0
  -4  -4 -10   11.34    1.33   0
  -3  -9 -11    8.25    1.70   0
  -3  -1  -7  212.31    1.86   0
  -6  -8 -10    4.10    2.42   0
  -6  -6 -10   53.06    2.71   0
  -5  -9 -11  223.79    3.70   0
  -5  -7 -11    5.72    2.28   0
  -5  -1  -7   31.11    1.40   0
  -4 -10 -11   41.24    2.53   0
  -4   0  -6    8.17    0.84   0
  -3  -5 -11  304.86    2.78   0
  -1  -5  -9  422.86    2.53   0
  -7  -3  -7   25.98    2.41   0
  -5  -5 -11   48.74    2.24   0
  -4  -8 -12  127.41    2.84   0
  -4  -2  -9   88.23    1.67   0
  -2  -4 -10  244.04    2.23   0
  -2  -2  -8    4.32    0.84   0
  -7  -5  -9  222.04    3.84   0
  -6  -8 -11    2.24    2.56   0
  -6  -2  -8    1.48    1.62   0
  -5  -7 -12    1.09    2.26   0
  -5  -3 -10   12.06    1.79   0
  -4  -6 -12   14.61    1.92   0
  -3  -9 -12  193.46    2.95   0
  -3  -7 -12    5.41    1.70   0
  -3  -3 -10   12.05    0.91   0
  -2  -6 -11   62.64    1.64   0
  -6  -6 -11    2.63    2.35   0
  -6  -4 -10   41.49    2.29   0
  -5  -9 -12   41.00    2.69   0
  -5  -1  -8   54.10    1.73   0
  -4 -10 -12  129.69    3.03   0
  -3  -1  -8    2.43    0.90   0
   0  -6  -8  112.54    1.28   0
  -7  -3  -8   47.11    2.55   0
  -5  -5 -12  252.31    3.56   0
  -4  -8 -13    8.08    2.09   0
  -4  -2 -10  199.69    2.32   0
  -4   0  -7    0.49    0.83   0
  -3  -5 -12  264.18    2.74   0
  -1  -5 -10    1.65    1.03   0
  -7  -5 -10  128.35    3.36   0
  -6  -6 -12    2.44    2.34   0
  -6  -4 -11  213.08    3.46   0
  -6  -2  -9  262.80    3.23   0
  -5  -9 -13  209.16    3.78   0
  -5  -7 -13   -1.64    2.25   0
  -5  -3 -11   87.40    2.33   0
  -4  -6 -13   20.98    2.04   0
  -3  -9 -13  289.62    3.80   0
  -3  -7 -13   42.93    2.13   0
  -3  -3 -11  109.48    1.88   0
  -2  -6 -12  281.48    2.74   0
  -2  -4 -11  177.80    2.07   0
  -2  -2  -9   43.73    1.19   0
  -7  -3  -9   20.26    2.31   0
  -5  -1  -9    1.89    1.48   0
  -4 -10 -13    2.89    2.06   0
  -3  -1  -9    0.38    0.95   0
  -5  -5 -13    8.37    2.26   0
  -4  -8 -14  122.33    2.94   0
  -4  -2 -11  885.32    4.65   0
  -4   0  -8 1631.20    5.51   0
  -1  -3  -9  255.41    1.92   0
  -7  -3 -10  190.06    3.85   0
  -6  -6 -13    5.28    2.35   0
  -6  -4 -12   42.88    2.50   0
  -6  -2 -10   21.30    1.91   0
  -5  -7 -14  117.30    3.09   0
  -5  -3 -12  283.50    3.45   0
  -4 -10 -14  370.01    4.59   0
  -4  -6 -14    0.51    1.92   0
  -4  -4 -13   58.40    1.91   0
  -3  -9 -14  135.25    3.12   0
  -3  -7 -14  488.20    4.24   0
  -3  -3 -12    4.04    1.27   0
  -2  -8 -13  216.49    2.85   0
  -1  -5 -11   64.26    1.35   0
   0  -6  -9  104.48    1.34   0
  -5  -5 -14   46.64    2.54   0
  -5  -1 -10  351.31    3.29   0
  -2  -6 -13  139.64    2.37   0
  -2  -4 -12  133.18    1.91   0
  -2  -2 -10  798.13    3.61   0
  -1  -7 -12   79.73    1.81   0
  -6  -6 -14   12.23    2.55   0
  -6  -4 -13   45.70    2.51   0
  -6  -2 -11  369.48    3.91   0
  -5  -7 -15  164.84    3.62   0
  -4  -8 -15   39.71    2.45   0
  -4  -2 -12   12.74    1.41   0
  -4   0  -9   -0.97    0.98   0
  -3  -1 -10  677.37    3.75   0
  -7  -3 -11   79.87    2.94   0
  -5  -3 -13  118.72    2.80   0
  -4  -6 -15  128.60    3.00   0
  -4  -4 -14  107.89    2.47   0
  -3  -9 -15  154.25    3.29   0
  -3  -7 -15    0.23    1.92   0
  -2  -8 -14   95.00    2.26   0
  -1  -3 -10  149.94    1.65   0
  -5  -5 -15   82.25    2.95   0
  -3  -3 -13  138.25    2.01   0
  -2  -6 -14   75.83    2.00   0
  -2  -4 -13   28.07    1.35   0
  -2  -2 -11  623.98    3.41   0
  -1  -5 -12   92.70    1.62   0
   0  -6 -10  122.53    1.57   0
  -7  -3 -12  225.02    4.03   0
  -6  -6 -15   12.01    2.76   0
  -6  -4 -14  106.47    3.06   0
  -6  -2 -12   29.06    2.14   0
  -5  -7 -16  169.69    3.67   0
  -5  -3 -14  119.08    2.86   0
  -4  -8 -16  319.63    4.17   0
  -4   0 -10 1459.95    5.82   0
  -3  -5 -15    8.92    1.97   0
  -3  -1 -11    6.33    1.21   0
  -3   1  -7  204.91    1.84   0
  -1  -7 -13  237.74    2.58   0
  -5   1  -8   54.47    1.57   0
  -4  -6 -16    0.88    2.27   0
  -4  -4 -15    7.72    2.12   0
  -3  -9 -16  528.40    5.08   0
  -3  -7 -16  448.94    4.40   0
  -2  -8 -15  142.26    2.95   0
  -2   0  -8  131.78    1.55   0
  -6  -4 -15    6.43    2.39   0
  -6  -2 -13  131.39    2.93   0
  -5  -5 -16   54.22    2.82   0
  -2  -4 -14   16.86    1.39   0
  -1  -3 -11   15.29    1.00   0
  -7  -3 -13    3.92    2.85   0
  -5  -7 -17   20.63    2.73   0
  -5  -3 -15   10.67    2.22   0
  -4  -8 -17    0.60    2.47   0
  -4  -4 -16  349.50    4.12   0
  -4   0 -11    1.37    1.31   0
  -3  -5 -16    2.03    1.76   0
  -3  -1 -12 1826.37    6.39   0
  -2  -2 -12   17.58    1.30   0
  -1  -7 -14  456.00    3.71   0
  -1  -5 -13   97.51    1.79   0
   0  -6 -11   18.34    1.07   0
  -5  -5 -17  168.69    3.66   0
  -5  -1 -13  325.06    3.69   0
  -5   1  -9    1.86    1.28   0
  -3  -9 -17    8.68    2.44   0
  -3  -7 -17   46.48    2.45   0
  -2  -8 -16  602.92    4.86   0
  -2   0  -9   -0.97    0.92   0
  -7  -3 -14    8.45    3.10   0
  -6  -4 -16  158.60    3.76   0
  -6  -2 -14   14.71    2.21   0
  -4  -8 -18  322.67    4.68   0
  -2  -6 -16   18.35    1.99   0
  -2  -4 -15    3.24    1.34   0
  -1  -3 -12    7.79    1.04   0
   0  -4 -10    8.82    0.85   0
  -5  -3 -16   85.20    2.95   0
  -5   1 -10  364.36    3.51   0
  -4  -4 -17  168.02    3.39   0
  -4  -2 -15  328.26    3.74   0
  -4   0 -12  697.29    4.46   0
  -3  -5 -17    8.30    2.19   0
  -3  -1 -13  368.46    3.21   0
  -3   1  -9    1.36    1.20   0
  -2  -2 -13  158.34    2.20   0
  -1  -5 -14  549.26    3.71   0
  -6  -4 -17  168.34    3.97   0
  -6  -2 -15  102.88    3.08   0
  -5  -5 -18   23.28    2.72   0
  -5  -1 -14   71.00    2.52   0
  -4   2  -7   64.58    1.43   0
  -3  -9 -18   23.60    2.59   0
  -2  -8 -17    1.36    2.25   0
  -2   0 -10 1181.44    4.51   0
  -6   0 -12    1.06    2.27   0
  -5  -3 -17    0.46    2.56   0
  -2  -6 -17  194.15    3.06   0
  -2  -4 -16  797.39    4.94   0
  -1  -3 -13  162.88    2.11   0
  -5  -1 -15    1.07    2.13   0
  -5   1 -11   24.20    1.80   0
  -4  -6 -19    5.51    2.65   0
  -4  -4 -18  509.05    5.15   0
  -4  -2 -16  165.13    2.71   0
  -4   0 -13    2.98    1.59   0
  -4   2  -8   54.40    1.49   0
  -3  -5 -18  105.24    3.00   0
  -3   1 -10  702.67    3.86   0
  -2  -2 -14  121.04    2.11   0
  -1  -5 -15  610.27    4.10   0
  -1  -1 -10  120.54    1.65   0
   0  -4 -11   77.86    1.39   0
  -6  -2 -16   63.76    3.17   0
  -6   0 -13   -0.23    2.53   0
  -5  -5 -19  310.45    4.85   0
  -3  -9 -19  103.92    3.76   0
  -3  -7 -19  114.52    3.10   0
  -3  -3 -17   42.86    2.04   0
  -2  -8 -18 1057.98    6.93   0
  -2   0 -11   -0.02    1.10   0
  -5  -3 -18   41.15    3.09   0
  -4  -6 -20    1.16    2.69   0
  -4  -4 -19   50.55    3.20   0
  -4  -2 -17  228.95    3.56   0
  -4   0 -14 1067.96    6.05   0
  -3  -5 -19   95.14    3.06   0
  -3  -1 -15   24.42    1.74   0
  -2  -6 -18  159.88    3.10   0
  -6  -2 -17    7.81    2.85   0
  -6   0 -14  413.06    4.83   0
  -4   2  -9   90.48    1.85   0
  -3  -7 -20  281.24    4.46   0
  -3   1 -11    7.97    1.33   0
  -1  -5 -16   51.97    1.94   0
  -1  -3 -14  199.53    2.27   0
   0  -4 -12   14.52    1.06   0
  -3  -3 -18  443.10    4.63   0
  -2  -8 -19    2.64    2.49   0
  -2   0 -12  178.22    2.30   0
  -1  -7 -17  240.99    3.54   0
  -6  -2 -18    7.64    2.96   0
  -6   0 -15    1.27    3.10   0
  -5  -1 -17    9.57    2.56   0
  -4  -6 -21   50.91    3.22   0
  -4  -4 -20   32.94    3.00   0
  -4  -2 -18   39.48    2.76   0
  -3  -5 -20  315.39    4.55   0
  -3   1 -12 1893.72    6.96   0
  -2  -6 -19    1.69    2.19   0
  -2  -4 -18  948.00    6.11   0
  -2  -2 -16   17.01    1.57   0
  -1  -3 -15    7.65    1.33   0
  -3  -7 -21   62.28    3.25   0
  -3  -3 -19   30.80    2.36   0
  -1  -5 -17   11.60    1.63   0
  -1  -1 -12  730.26    3.92   0
   0  -4 -13   69.26    1.57   0
  -5  -3 -20   56.86    3.34   0
  -5  -1 -18   -0.04    2.60   0
  -4  -2 -19  105.99    3.39   0
  -4   0 -16  222.94    3.57   0
  -4   2 -11  932.38    5.15   0
  -2  -8 -20   17.16    2.72   0
  -2  -6 -20   10.72    2.26   0
  -2   0 -13   -0.25    1.31   0
  -1  -7 -18    5.05    2.32   0
  -6   2  14  156.98    3.41   0
  -6   2  16   15.02    2.48   0
  -5   1  19    9.06    2.14   0
  -4   0  20  954.58    6.10   0
  -4   2  26   22.09    2.65   0
  -2   0  24  190.53    3.03   0
  -1  -1  21  400.67    3.37   0
  -1   1  27   16.09    2.10   0
  -6   2  17   74.05    3.20   0
  -4   0  21    3.33    2.16   0
  -2   0  25    4.63    1.99   0
  -6   2  18  211.24    3.73   0
  -6   2  19  203.25    3.74   0
  -5   1  21  238.81    3.87   0
  -4   0  22  251.26    3.96   0
  -3  -1  20   80.41    2.34   0
  -3   1  27   13.57    2.59   0
  -2  -2  11  203.15    2.11   0
  -2  -2  12  136.42    1.86   0
  -2  -2  13   39.24    1.41   0
  -2  -2  14    0.44    1.13   0
  -2  -2  15  259.12    2.63   0
  -6   2  20  180.51    3.74   0
  -5   1  22  224.31    3.87   0
  -3  -1  21  142.25    2.97   0
  -2  -2   9  560.99    2.93   0
  -2  -2  16  236.26    2.63   0
  -2  -2  17  602.28    4.01   0
  -2   0  26  142.48    3.11   0
  -1  -1  23   70.91    2.16   0
   0  -2  13  196.31    1.80   0
   0  -2  14   68.33    1.33   0
   0  -2  15  207.68    2.07   0
  -6   2  21   20.66    2.81   0
  -5   1  23    5.11    2.89   0
  -4   0  23   -2.33    2.39   0
  -2  -2  18   15.45    1.62   0
   0  -2  16   44.41    1.28   0
  -4   0  24  213.13    3.83   0
  -2  -2  19  636.43    4.44   0
  -2   0  27    2.73    2.26   0
  -1  -1  24  152.70    2.85   0
   0  -2  17  166.40    1.96   0
   0  -2  18   40.78    1.61   0
  -4   0  25   -4.02    2.34   0
  -3  -1  24   13.36    2.36   0
  -1  -1  25   12.40    2.14   0
  -5  -1  15  138.68    2.98   0
  -5  -1  16   66.09    2.64   0
  -2  -2  21   75.87    2.34   0
  -2   0  28   21.34    2.77   0
   0  -2  20   39.09    1.80   0
  -5  -1  10   62.21    2.06   0
  -5  -1  11   11.25    1.62   0
  -5  -1  17    6.15    2.20   0
  -5  -1  18  304.32    3.95   0
  -4  -2  12  179.42    2.42   0
  -4  -2  13  215.66    2.72   0
  -4  -2  14  163.61    2.52   0
  -4   0  26   55.15    2.93   0
  -3  -1  25    5.85    2.05   0
  -6   0  12  163.35    3.34   0
  -6   0  13   -2.04    2.19   0
  -6   0  14   62.03    2.87   0
  -6   0  15   -1.43    2.14   0
  -6   0  16  211.15    3.66   0
  -6   0  17    2.73    2.35   0
  -6   0  18   25.70    2.44   0
  -5  -1  19    6.19    2.27   0
  -5  -1  20   40.57    2.72   0
  -4  -2  10   18.26    1.20   0
  -4  -2  11  545.94    3.63   0
  -4  -2  17  359.25    3.84   0
  -4  -2  18   30.73    1.97   0
  -3  -1  26  104.70    2.91   0
  -2  -2  23    2.12    1.73   0
  -6   0  19   -1.12    2.33   0
  -5  -1   8  111.86    1.86   0
  -4  -2  19  304.77    3.53   0
  -4  -2  20  408.93    4.25   0
  -2  -2  24   23.99    1.92   0
  -1  -3  13  136.56    1.72   0
  -1  -3  14  204.68    2.07   0
  -1  -3  15    9.99    1.13   0
  -1  -3  16  220.06    2.38   0
  -1  -3  17   17.32    1.54   0
  -6   0  20  561.32    5.47   0
  -6   0  21    3.62    2.49   0
  -4  -2  21   43.21    2.47   0
  -3  -3  13 1550.88    5.92   0
  -3  -3  14  209.99    2.47   0
  -3  -3  16   43.62    1.64   0
  -3  -1  27   15.54    2.40   0
  -2  -2  25  181.86    3.15   0
  -1  -3  11  534.10    2.77   0
  -1  -3  12   32.92    0.90   0
  -1  -3  18   26.25    1.38   0
  -5  -1   7   35.72    1.37   0
  -5  -1  23    5.51    2.33   0
  -3  -3  11  157.52    2.03   0
  -3  -3  12  245.12    2.47   0
  -3  -3  19    0.82    1.77   0
  -1  -3  10  203.61    1.73   0
  -1  -3  19   93.32    1.92   0
  -1  -3  20   94.36    1.87   0
  -5  -1   6    8.55    1.31   0
  -5  -1  24  329.25    4.42   0
  -4  -2   7   91.93    1.53   0
  -4  -2  23   68.15    2.76   0
  -3  -3  10  225.05    2.24   0
  -3  -3  20  127.78    2.79   0
  -2  -2  26  117.51    2.92   0
  -4  -2  24   22.62    2.31   0
  -3  -3   9  837.95    3.86   0
  -3  -3  21   96.61    2.62   0
  -2  -2  27   83.86    2.78   0
  -1  -3  22  297.73    3.22   0
  -8  -2  16    1.23    2.22   0
  -7  -5  15   62.84    2.68   0
  -7  -1  17    6.85    2.27   0
  -6  -8  11   95.16    2.50   0
  -6  -6  14   -0.99    2.02   0
  -6   0  17    0.04    1.84   0
  -5  -9   8    4.49    1.83   0
  -5  -7  12   21.55    1.92   0
  -4  -6  12  184.98    2.31   0
  -4  -4  14  127.62    2.02   0
  -4  -2  15  101.12    1.92   0
  -3  -3  13 1557.93    4.82   0
  -7  -7  12    7.68    2.35   0
  -5  -9   7    4.95    2.06   0
  -5  -1  16   61.70    1.85   0
  -5   1  16   64.61    1.81   0
  -4  -8   8  291.69    2.64   0
  -4   0  15   -0.58    1.06   0
  -3  -7   8  310.72    2.43   0
  -3  -5  11  289.95    2.25   0
  -7  -5  14    3.74    2.41   0
  -6  -6  13  100.67    2.52   0
  -6  -2  16   15.31    1.91   0
  -4  -6  11    7.02    1.36   0
  -3  -1  13  861.72    3.38   0
  -8  -4  14  113.68    2.89   0
  -8  -2  15    3.17    2.24   0
  -7  -9   7   38.41    2.34   0
  -7  -7  11   38.79    2.60   0
  -7  -3  15   11.82    2.18   0
  -7  -1  16   21.30    2.12   0
  -6   0  16  212.28    2.80   0
  -4  -8   7   20.73    1.39   0
  -4  -4  13   40.56    1.37   0
  -4  -2  14  168.33    2.00   0
  -3  -5  10  279.62    2.12   0
  -3  -3  12  248.28    2.03   0
  -8   0  15    1.93    2.09   0
  -7  -9   6  260.69    3.31   0
  -6  -6  12  183.64    2.80   0
  -6  -4  14  288.75    3.22   0
  -5   1  15  137.41    2.15   0
  -8  -6  11   64.86    2.51   0
  -8  -4  13   53.91    2.55   0
  -8  -2  14   16.47    2.52   0
  -7  -1  15   51.92    2.08   0
  -6  -8   8  288.72    3.36   0
  -4  -8   6   56.21    1.41   0
  -4  -6  10  155.12    2.09   0
  -4   0  14   48.04    1.35   0
  -3  -7   6  638.36    2.99   0
  -7  -9   5   19.62    2.04   0
  -7  -3  14   76.01    2.40   0
  -6  -6  11   58.34    2.12   0
  -5  -7   9   21.42    1.73   0
  -5  -5  12   43.76    1.71   0
  -4  -4  12  612.57    3.26   0
  -3  -5   9  691.71    3.03   0
  -3  -3  11  158.38    1.62   0
  -3  -1  12   44.83    1.15   0
  -8  -6  10   85.32    2.57   0
  -8  -4  12   75.42    2.63   0
  -8   0  14   26.60    2.10   0
  -7  -7   9   13.19    2.00   0
  -7  -5  12    9.79    1.96   0
  -6  -4  13    7.90    1.70   0
  -5  -1  14   29.87    1.58   0
  -4  -8   5   30.98    1.26   0
  -4  -6   9   58.02    1.58   0
  -4  -2  13  217.68    1.96   0
  -3  -7   5 1307.70    4.10   0
  -8  -2  13    3.33    2.29   0
  -7  -3  13  377.53    3.69   0
  -7  -1  14   18.38    1.84   0
  -5  -5  11   75.50    1.93   0
  -5   1  14   31.48    1.34   0
  -4   0  13   -1.40    0.95   0
  -8  -8   5   16.28    2.09   0
  -8  -6   9   29.05    2.30   0
  -8  -4  11   57.35    2.54   0
  -8   0  13    2.49    2.28   0
  -7  -7   8  107.81    2.66   0
  -7  -5  11  101.04    2.43   0
  -7   1  14   19.63    1.71   0
  -6  -8   6   76.75    2.00   0
  -6  -4  12  368.24    3.25   0
  -5  -7   8  133.19    2.20   0
  -4  -8   4  347.09    2.58   0
  -3  -5   8  146.15    1.60   0
  -8  -8   4  243.34    3.32   0
  -8  -6   8   28.80    2.28   0
  -8  -2  12  180.07    3.00   0
  -4  -6   8   38.60    1.42   0
  -3  -7   4  144.86    1.50   0
  -7  -5  10   29.47    2.00   0
  -7  -3  12    3.84    2.02   0
  -7  -1  13   21.01    1.92   0
  -6  -8   5   17.49    1.76   0
  -6  -6   9  104.69    2.15   0
  -5  -7   7   90.50    1.89   0
  -5  -5  10   -0.16    1.23   0
  -5  -3  12    5.10    1.40   0
  -5  -1  13  165.38    2.13   0
  -5   1  13  166.04    1.98   0
  -4  -4  10  223.26    1.96   0
  -4   2  12  176.12    1.69   0
  -8  -8   3   17.10    2.15   0
  -8  -6   7    1.89    2.05   0
  -8  -4  10   30.16    2.24   0
  -8   0  12  607.01    4.39   0
  -7   1  13   20.66    1.82   0
  -6   0  13    1.39    1.42   0
  -4  -8   3  378.02    2.48   0
  -4  -6   7  989.55    3.89   0
  -4   0  12    3.20    1.00   0
  -3  -5   7    1.50    0.88   0
  -3  -3   9  766.24    2.87   0
  -8  -8   2  178.49    2.88   0
  -8  -2  11  202.62    3.04   0
  -7  -7   6  546.62    4.05   0
  -7  -5   9   72.00    2.23   0
  -7  -3  11    8.91    1.83   0
  -6  -8   4  229.09    2.68   0
  -6  -6   8  192.41    2.50   0
  -5  -7   6  681.26    3.67   0
  -5  -3  11  118.54    1.77   0
  -4  -2  11  540.69    2.74   0
  -8  -6   6   39.13    2.22   0
  -8  -4   9  287.28    3.45   0
  -7  -1  12   20.48    1.81   0
  -5  -1  12  163.16    2.00   0
  -4  -4   9   81.07    1.31   0
  -9  -1   9   24.26    2.31   0
  -8  -8   1   11.57    1.84   0
  -8  -2  10   98.38    2.51   0
  -8   0  11   -2.57    1.97   0
  -7  -7   5  125.19    2.40   0
  -7   1  12   22.05    1.78   0
  -6  -8   3    8.04    1.65   0
  -6   0  12  171.82    2.20   0
  -5  -7   5  317.83    2.54   0
  -5   1  12  165.76    1.84   0
  -4  -6   6   48.69    1.36   0
  -3  -5   6    6.34    0.86   0
  -9   1   9   20.13    1.95   0
  -8  -6   5   29.67    2.17   0
  -8  -4   8  256.25    3.39   0
  -7  -5   8   37.92    1.61   0
  -7  -3  10    1.66    1.75   0
  -6  -2  11  171.76    2.32   0
  -5  -5   8   19.33    1.26   0
  -5  -3  10   14.78    1.20   0
  -4  -2  10   16.23    0.93   0
  -4   0  11    0.50    0.79   0
  -4   2  11  541.88    2.51   0
  -9  -3   7  486.58    4.15   0
  -9  -1   8   49.34    2.58   0
  -8   0  10   93.40    2.39   0
  -7  -7   4  216.24    2.75   0
  -6  -8   2  578.26    3.69   0
  -5  -7   4  429.41    2.85   0
  -5  -1  11   11.81    1.23   0
  -4  -4   8   81.06    1.27   0
  -8  -6   4    7.90    2.02   0
  -8  -4   7    2.41    2.22   0
  -7  -7   3    2.17    1.66   0
  -7  -5   7    1.48    1.72   0
  -7  -3   9  183.56    2.62   0
  -7   1  11    5.36    1.57   0
  -6  -8   1  244.97    2.74   0
  -6   0  11   -0.44    1.28   0
  -4  -6   5   34.32    1.11   0
  -9  -3   6  166.27    2.93   0
  -9   1   8   41.20    2.21   0
  -7  -1  10   25.49    1.70   0
  -6  -4   8   83.16    1.92   0
  -6  -2  10  406.75    3.08   0
  -6   2  11  168.17    2.09   0
  -5  -7   3   22.13    1.43   0
  -5  -5   7   59.49    1.56   0
  -5  -3   9  203.85    1.96   0
  -5   1  11   12.57    1.08   0
  -4   0  10  251.08    1.82   0
  -9  -3   5   52.75    2.30   0
  -9  -1   7  176.93    2.92   0
  -8  -4   6    7.99    1.96   0
  -8   0   9    1.72    1.68   0
  -8   2   9  577.25    4.02   0
  -7  -7   2   78.68    1.97   0
  -7  -5   6   63.14    2.01   0
  -5  -1  10   64.51    1.48   0
  -4  -6   4   59.76    1.28   0
  -4  -4   7   16.73    0.84   0
  -4  -2   9  296.66    1.98   0
  -9   1   7  180.49    3.05   0
  -7  -3   8   14.38    1.68   0
  -7   1  10   26.69    1.75   0
  -5  -5   6   11.78    1.31   0
  -9  -3   4    2.20    2.04   0
  -9  -1   6   12.42    2.02   0
  -8  -2   7   72.75    2.31   0
  -8   0   8    5.54    2.01   0
  -7  -7   1    0.94    1.61   0
  -7  -5   5   31.59    1.88   0
  -6  -4   7   75.71    1.81   0
  -6  -2   9  221.25    2.39   0
  -6   0  10 1338.05    4.90   0
  -6   2  10  408.73    2.81   0
  -5  -7   2    0.12    0.99   0
  -5  -3   8   15.66    1.05   0
  -5   1  10   64.67    1.30   0
  -9   1   6    8.95    2.38   0
  -8  -6   1   84.61    2.44   0
  -8   2   8  279.73    2.91   0
  -7  -7   0  369.91    3.50   0
  -7  -3   7   52.78    1.82   0
  -4  -6   3  417.65    2.38   0
  -4  -4   6   53.42    1.03   0
  -4  -2   8   76.48    1.14   0
  -9  -1   5  167.89    2.89   0
  -8  -4   4  442.21    3.79   0
  -7  -5   4    4.12    1.86   0
  -7  -1   8  115.88    2.11   0
  -7   1   9    5.37    1.41   0
  -6  -6   3   32.27    1.64   0
  -6  -4   6  199.60    2.32   0
  -6  -2   8    6.61    1.38   0
  -5  -7   1   20.42    1.16   0
  -5  -5   5  221.21    2.12   0
  -5  -1   9  199.05    1.77   0
  -8  -6   0    1.15    1.77   0
  -8   0   7    0.10    1.67   0
  -7  -7  -1   18.82    1.81   0
  -7  -3   6  288.32    2.81   0
  -6   0   9   -0.15    1.28   0
  -4  -6   2   11.00    0.81   0
  -9  -3   2   97.69    2.59   0
  -9  -1   4  134.64    2.67   0
  -9   1   5  163.74    2.86   0
  -8  -6  -1    2.99    1.97   0
  -8  -4   3   20.45    1.94   0
  -8   2   7   72.86    2.11   0
  -7  -5   3    2.07    1.66   0
  -6  -6   2    0.69    1.32   0
  -6   2   9  220.20    2.14   0
  -5  -7   0  122.09    1.66   0
  -5  -5   4  322.11    2.35   0
  -5   1   9  198.66    1.77   0
  -4  -4   5   71.47    1.12   0
  -8  -6  -2  104.03    2.77   0
  -8  -2   5   67.60    2.23   0
  -8   0   6    2.44    1.67   0
  -7  -1   7   37.75    1.68   0
  -6  -4   5   35.87    1.41   0
  -6  -2   7   32.79    1.47   0
  -5  -1   8  113.65    1.52   0
  -4  -2   7   93.46    1.17   0
  -4   0   8 1794.37    4.23   0
  -9  -3   1    0.51    1.99   0
  -9  -1   3   14.10    2.05   0
  -9   1   4  135.08    2.72   0
  -8  -4   2  112.92    2.47   0
  -7  -7  -3  211.96    2.56   0
  -7  -3   5  330.39    2.97   0
  -6  -6   1   25.71    1.44   0
  -6   0   8   40.53    1.51   0
  -5  -7  -1   16.45    0.99   0
  -4  -6   1  356.78    2.13   0
  -9  -3   0  165.82    2.86   0
  -8  -6  -3   38.40    2.11   0
  -8  -2   4  125.73    2.41   0
  -8   2   6   20.30    1.83   0
  -6  -4   4  108.59    1.88   0
  -6   2   8    7.57    1.11   0
  -5  -5   3    0.42    1.08   0
  -9   1   3   15.66    2.04   0
  -9   3   3   -0.53    2.21   0
  -8  -6  -4   -1.48    1.89   0
  -8  -4   1    3.26    1.84   0
  -8   0   5    1.00    1.62   0
  -7  -7  -4   10.81    1.48   0
  -7  -5   1   23.88    1.70   0
  -7  -3   4   98.57    2.01   0
  -6  -6   0   31.64    1.48   0
  -6  -2   6  259.06    2.32   0
  -5  -7  -2  136.94    1.62   0
  -5  -1   7   37.11    1.16   0
  -5   1   8  112.76    1.42   0
  -4  -4   4   59.85    1.06   0
  -9  -3  -1  199.37    2.99   0
  -8  -6  -5   92.98    2.62   0
  -8  -4   0   12.50    1.87   0
  -8  -2   3  169.98    2.64   0
  -8   2   5   69.70    2.16   0
  -6   0   7   -0.31    1.05   0
  -5  -5   2   27.67    1.19   0
  -4  -6   0   70.07    1.19   0
  -9  -3  -2   10.94    1.89   0
  -9  -1   1   21.99    2.11   0
  -9   1   2  205.45    2.83   0
  -8   0   4   61.21    2.06   0
  -7  -5   0    3.47    1.53   0
  -7  -3   3   63.29    1.87   0
  -6  -6  -1  131.71    1.97   0
  -6  -4   3  133.83    1.97   0
  -9  -1   0   56.75    2.32   0
  -9   3   2   96.39    2.36   0
  -8  -6  -6   20.90    1.88   0
  -8  -2   2   29.95    1.94   0
  -6  -2   5    4.51    1.20   0
  -6   2   7   31.94    1.30   0
  -5  -1   6    9.68    0.91   0
  -5   1   7   35.39    1.04   0
  -4  -6  -1  227.80    1.70   0
  -4  -4   3  283.51    1.86   0
  -9   1   1   22.36    1.92   0
  -8  -6  -7  158.85    2.73   0
  -8   0   3    0.94    1.65   0
  -8   2   4  122.06    2.31   0
  -7  -5  -1   10.61    1.56   0
  -6  -6  -2    0.41    1.24   0
  -6  -4   2  623.12    3.41   0
  -6   0   6    0.43    1.15   0
  -5  -5   1    3.54    1.12   0
  -5  -3   4  138.69    1.55   0
  -5   3   7  253.77    1.85   0
  -4  -2   5   43.46    0.88   0
  -9  -3  -4   28.04    2.03   0
  -9  -1  -1  103.78    2.62   0
  -8  -6  -8   41.22    1.96   0
  -8  -4  -2   72.51    2.17   0
  -8  -2   1  270.03    3.02   0
  -7  -5  -2  192.94    2.48   0
  -9  -3  -5   32.74    2.13   0
  -9   1   0   56.54    2.23   0
  -8   2   3  173.19    2.45   0
  -6  -6  -3  141.72    1.96   0
  -6  -4   1   58.65    1.61   0
  -6   2   6  265.70    2.18   0
  -5  -5   0   79.21    1.47   0
  -4  -6  -2   13.06    0.90   0
  -4  -4   2   71.30    1.12   0
  -9  -1  -2  309.70    3.46   0
  -9   3   0  170.18    2.80   0
  -8  -2   0   76.85    2.17   0
  -7  -5  -3  126.70    2.19   0
  -6   0   5    0.97    1.14   0
  -5  -3   3  457.22    2.48   0
  -5  -1   5   50.12    1.03   0
  -5   1   6    8.98    0.88   0
  -9  -3  -6    1.67    1.90   0
  -9  -1  -3   22.08    2.10   0
  -9   1  -1  106.93    2.53   0
  -8  -4  -4   92.40    2.35   0
  -8   2   2   33.82    1.79   0
  -6  -6  -4    7.08    1.35   0
  -6  -2   3   94.28    1.54   0
  -5   3   6  617.57    2.76   0
  -9   1  -2  320.21    3.49   0
  -9   3  -1  203.92    3.00   0
  -8  -4  -5   14.39    1.84   0
  -8  -2  -1    1.80    1.71   0
  -7  -5  -4    3.10    1.50   0
  -6  -6  -5  445.71    3.11   0
  -6  -4   0   78.25    1.56   0
  -6   2   5    5.42    1.05   0
  -5  -5  -1   67.00    1.31   0
  -4  -6  -3   94.16    1.22   0
  -4  -4   1  178.29    1.50   0
  -9  -1  -4    1.46    2.02   0
  -9   3  -2    7.75    2.39   0
  -8  -2  -2   44.35    1.93   0
  -7  -5  -5  373.64    3.14   0
  -6   0   4  504.07    2.91   0
  -5  -3   2   48.69    1.06   0
  -5  -1   4    7.02    0.74   0
  -9  -1  -5    0.24    2.05   0
  -9   1  -3   21.16    2.21   0
  -8   0   0  572.56    4.03   0
  -8   2   1  271.68    2.89   0
  -8   4   1    0.66    1.44   0
  -6  -6  -6    4.92    1.65   0
  -6  -4  -1  104.36    1.69   0
  -5  -5  -2  165.51    1.78   0
  -4  -6  -4  181.29    1.54   0
  -9  -1  -6    4.37    1.98   0
  -9   3  -3   71.45    2.44   0
  -8  -4  -7    8.90    1.99   0
  -8  -2  -3  126.35    2.40   0
  -7  -5  -6    2.17    1.45   0
  -6   2   4   68.79    1.44   0
  -4  -4   0  432.57    2.12   0
  -9  -1  -7    8.10    1.93   0
  -9   1  -4    4.83    1.87   0
  -8  -4  -8   75.55    2.32   0
  -8   0  -1   -2.18    1.40   0
  -8   2   0   74.00    2.07   0
  -8   4   0   13.72    1.56   0
  -7  -5  -7   42.57    1.91   0
  -6  -4  -2  159.86    1.99   0
  -6  -2   1  131.47    1.68   0
  -6   0   3   -0.57    1.05   0
  -5  -3   1   97.38    1.32   0
  -5  -1   3   17.26    0.85   0
  -5   3   5   35.94    1.01   0
  -9  -1  -8  202.98    3.15   0
  -8  -4  -9   59.59    2.28   0
  -8  -2  -4   13.12    1.78   0
  -7  -5  -8    1.00    1.61   0
  -7  -3  -3   88.99    2.00   0
  -5  -5  -3  186.81    1.79   0
  -5   1   4    7.55    0.87   0
  -9   1  -6    4.26    1.90   0
  -9   3  -5   32.29    2.20   0
  -8  -4 -10   27.98    2.10   0
  -8  -2  -5   30.28    2.14   0
  -8   4  -1    2.13    1.55   0
  -7  -5  -9  218.07    2.76   0
  -6  -4  -3  395.64    2.79   0
  -5  -3   0   86.44    1.30   0
  -4  -4  -1   18.08    0.81   0
  -8  -4 -11   60.69    2.40   0
  -8  -2  -6  102.05    2.39   0
  -8   0  -3    1.30    1.66   0
  -7  -5 -10  125.09    2.53   0
  -7  -3  -4   18.87    1.52   0
  -6  -2   0    0.73    1.03   0
  -6   0   2  128.39    1.72   0
  -6   2   3   93.86    1.50   0
  -6   4   3  135.77    1.66   0
  -5  -5  -4   95.86    1.45   0
  -9   1  -7    1.93    1.96   0
  -9   3  -6    4.89    2.20   0
  -8  -4 -14   55.00    2.49   0
  -8  -4 -13   27.19    2.24   0
  -8   2  -2   42.04    1.95   0
  -8   4  -2   77.00    2.05   0
  -7  -5 -11   23.34    1.90   0
  -5  -1   2  630.30    2.76   0
  -5   3   4  136.45    1.45   0
  -9   1  -8  201.74    3.08   0
  -8  -2  -7   18.66    1.93   0
  -8   0  -4  352.38    3.34   0
  -7  -5 -12  155.42    2.42   0
  -7  -3  -5  174.51    2.35   0
  -6  -2  -1    6.20    1.06   0
  -6   0   1    0.75    1.08   0
  -5  -5  -5 1436.64    4.42   0
  -5  -3  -1 1276.66    4.01   0
  -5   1   3   17.07    0.85   0
  -8   0  -5    0.21    1.69   0
  -8   2  -3  127.26    2.36   0
  -7  -3  -6   41.61    1.73   0
  -6  -4  -5   77.88    1.61   0
  -6   2   2   87.34    1.55   0
  -6   4   2  616.03    3.20   0
  -4  -4  -2   14.45    0.73   0
  -8  -2  -9  104.95    2.50   0
  -8   2  -4    9.22    1.70   0
  -6  -2  -2    3.31    1.14   0
  -5  -5  -6    1.14    0.92   0
  -5  -1   1   13.25    0.79   0
  -5   3   3  466.95    2.45   0
  -8  -2 -10  121.57    2.57   0
  -8   0  -6   12.33    1.81   0
  -8   4  -4   89.98    2.29   0
  -7  -3  -7   24.99    1.68   0
  -6  -4  -6  391.00    2.80   0
  -6   0   0   95.68    1.50   0
  -5  -3  -2   51.15    1.13   0
  -8  -2 -11   11.27    2.19   0
  -8   0  -7    0.80    1.80   0
  -8   2  -5   32.78    1.86   0
  -7  -3  -8   47.75    1.86   0
  -6  -4  -7  356.00    2.75   0
  -6   2   1  133.53    1.79   0
  -5  -5  -7   68.97    1.34   0
  -5   1   2  643.09    2.76   0
  -4  -4  -3  506.33    2.27   0
  -8  -2 -12   22.26    2.16   0
  -8   4  -5   12.44    1.81   0
  -7  -3  -9   19.10    1.67   0
  -6  -2  -3  351.23    2.58   0
  -6   4   1   59.73    1.34   0
  -5  -3  -3   16.25    1.01   0
  -5  -1   0  277.23    1.91   0
  -8  -2 -14   -1.19    1.88   0
  -8  -2 -13   35.58    2.29   0
  -8   0  -8  337.98    3.24   0
  -8   2  -6  104.33    2.37   0
  -7   5  -2  196.80    2.36   0
  -6  -4  -8  172.68    2.09   0
  -6   0  -1   -1.37    0.69   0
  -6   2   0    1.99    1.18   0
  -5  -5  -8   31.10    1.13   0
  -5   3   2   51.17    1.09   0
  -4  -4  -4   50.26    0.97   0
  -8  -2 -15    6.96    2.16   0
  -8   0  -9    0.54    1.93   0
  -8   2  -7   18.31    1.93   0
  -8   4  -6  396.52    3.66   0
  -7  -3 -10  192.48    2.59   0
  -7  -1  -6   12.71    1.49   0
  -6  -4  -9   12.74    1.37   0
  -6  -2  -4   13.03    1.24   0
  -5  -5  -9  621.63    3.10   0
  -5   1   1   13.46    0.85   0
  -8   0 -10  629.20    4.48   0
  -8   4  -7    8.55    1.73   0
  -7  -3 -11   83.86    2.11   0
  -7   5  -3  129.76    2.12   0
  -6   0  -2  434.10    2.68   0
  -6   4   0   79.75    1.48   0
  -5  -3  -4    5.89    0.91   0
  -5  -1  -1  348.07    2.12   0
  -8   0 -11   -0.88    1.93   0
  -8   6  -8   39.92    1.98   0
  -7  -3 -13    1.36    1.65   0
  -7  -3 -12  227.47    2.84   0
  -7  -1  -7   -0.07    1.36   0
  -6  -4 -10   41.02    1.61   0
  -6   2  -1    4.48    1.15   0
  -5  -5 -10   24.84    1.11   0
  -4  -4  -5   89.15    1.09   0
  -8   0 -13    0.03    2.02   0
  -8   2  -9  100.15    2.51   0
  -8   4  -8   76.17    2.29   0
  -8   6  -9   64.70    2.29   0
  -7  -3 -14    9.16    1.89   0
  -7  -1  -8    6.24    1.48   0
  -7   5  -4    4.00    1.82   0
  -6   0  -3   -0.88    0.93   0
  -5  -3  -5  205.04    1.83   0
  -5   1   0  283.09    1.92   0
  -5   3   1   99.20    1.24   0
  -8   0 -14  365.59    3.96   0
  -8   2 -10  117.79    2.72   0
  -8   6 -10   72.68    2.31   0
  -7  -3 -17   24.87    2.41   0
  -7  -3 -15   24.22    2.10   0
  -6  -2  -6    1.63    0.80   0
  -6   4  -1  105.44    1.66   0
  -5  -1  -2  110.06    1.36   0
  -8   0 -16  375.44    4.10   0
  -8   0 -15   -0.28    2.09   0
  -8   2 -11   10.91    2.10   0
  -8   4 -10   27.61    2.31   0
  -8   6 -11    0.99    2.17   0
  -7  -3 -19  184.61    3.14   0
  -7  -3 -18    5.10    2.17   0
  -7  -1  -9   24.77    1.64   0
  -7   3  -5  178.55    2.33   0
  -7   5  -5  390.71    3.36   0
  -6  -4 -13   44.83    1.81   0
  -6  -2  -7    8.45    1.35   0
  -6   0  -4    3.55    0.97   0
  -6   2  -2    4.64    1.14   0
  -4  -4  -6  187.82    1.50   0
  -8   2 -13   38.79    2.34   0
  -8   4 -11   60.77    2.34   0
  -7  -1 -10   78.43    2.07   0
  -6  -4 -15    5.10    1.52   0
  -6  -4 -14  103.69    2.12   0
  -6   4  -2  162.03    1.83   0
  -5  -1  -3   17.89    0.84   0
  -5   1  -1  354.85    2.12   0
  -5   3   0   82.86    1.27   0
  -8   2 -14    0.55    2.03   0
  -8   4 -12    2.88    1.97   0
  -7  -1 -11   65.20    2.07   0
  -7   3  -6   46.19    1.71   0
  -7   5  -6    0.72    1.57   0
  -6  -2  -8    1.28    1.30   0
  -6   2  -3  346.28    2.56   0
  -4  -4  -7  521.81    2.40   0
  -8   2 -16    8.73    2.32   0
  -8   2 -15    8.86    2.21   0
  -8   4 -14   51.79    2.40   0
  -8   4 -13   25.43    2.20   0
  -7  -1 -12  431.42    3.67   0
  -7   1  -8    3.91    1.17   0
  -6  -2  -9  264.78    2.52   0
  -6   0  -5    0.23    0.69   0
  -7  -1 -14  133.33    2.55   0
  -7   1  -9   26.51    1.67   0
  -7   5  -7   39.57    1.95   0
  -6   0  -6 1112.23    4.35   0
  -6   2  -4   13.52    1.15   0
  -6   4  -3  402.31    2.70   0
  -5  -3  -8    2.25    1.07   0
  -5  -1  -4 1412.02    4.13   0
  -4  -4  -8  228.16    1.79   0
  -7  -1 -15    0.23    1.87   0
  -7   1 -10   78.63    2.12   0
  -7   3  -8   48.12    1.90   0
  -6  -2 -10   22.23    1.48   0
  -5   3  -1 1336.85    3.96   0
  -5   5  -1   64.82    1.28   0
  -7  -1 -17    2.02    2.27   0
  -7   1 -11   63.50    2.11   0
  -7   3  -9   18.18    1.82   0
  -7   5  -8    0.28    1.51   0
  -6  -2 -11  370.42    3.00   0
  -6   0  -7    0.19    1.13   0
  -6   2  -5  161.71    2.03   0
  -6   4  -4   40.72    1.36   0
  -5  -3  -9    6.10    0.98   0
  -5  -1  -5   59.44    1.11   0
  -7   1 -12  429.09    3.66   0
  -7   5  -9  224.22    2.81   0
  -7   7 -10    6.25    1.76   0
  -5  -3 -10   11.77    1.10   0
  -5   1  -3   18.33    0.81   0
  -4  -4  -9   90.55    1.21   0
  -6   2 -22    2.22    2.04   0
  -5   1 -24  120.03    2.54   0
  -4   0 -24   36.86    1.90   0
  -3  -1 -23   10.28    1.45   0
  -2  -2 -20   -0.57    0.98   0
  -2  -2 -19 1022.73    4.18   0
  -2   0 -27    0.04    1.46   0
   0  -2 -18   40.55    1.08   0
   0  -2 -17  161.55    1.63   0
  -6   2 -21   -1.53    1.88   0
  -4   0 -23    0.10    1.63   0
  -3   1 -28    1.95    1.84   0
  -2  -2 -18  130.66    1.77   0
  -1   1 -29    2.81    1.44   0
   0  -2 -16   40.49    0.93   0
  -6   2 -20    2.20    2.05   0
  -5   1 -22  232.25    2.98   0
  -2  -2 -16   17.69    0.90   0
  -2   0 -26    4.85    1.55   0
  -2   2 -30    6.73    1.90   0
  -1  -1 -23   87.85    1.68   0
  -6   2 -19   40.33    2.05   0
  -5   1 -21   32.98    1.91   0
  -4   0 -22   -1.14    1.58   0
  -4   2 -27   57.85    2.28   0
  -3  -1 -20    9.22    1.43   0
  -3   1 -27    4.52    1.79   0
  -2  -2 -15   54.80    1.13   0
  -2  -2 -14  118.46    1.39   0
  -1  -1 -22  134.40    1.90   0
  -1   1 -28    2.78    1.46   0
  -6   2 -18    8.41    1.88   0
  -6   2 -17   13.37    2.05   0
  -4   0 -21    1.38    1.48   0
  -3  -1 -19    2.64    1.31   0
  -2   0 -25    0.55    1.45   0
  -2   2 -29   20.98    1.76   0
  -6   2 -16   66.94    2.09   0
  -5   1 -19   48.45    1.81   0
  -5   3 -25   69.42    2.31   0
  -4   2 -26   91.41    2.45   0
  -3  -1 -18    4.68    1.14   0
  -2   0 -24   24.16    1.60   0
  -1  -1 -21  134.87    1.86   0
  -1   1 -27   66.63    1.92   0
   0   0 -24    8.55    1.31   0
  -6   2 -15  100.18    2.20   0
  -6   4 -22    5.44    1.98   0
  -4   0 -19   -0.52    1.46   0
  -4   2 -25  140.76    2.64   0
  -3  -1 -17   40.51    1.23   0
  -3   3 -29   20.96    1.91   0
  -1  -1 -20   36.57    1.34   0
  -1   3 -30   19.25    1.70   0
   0   0 -23   -1.61    1.15   0
  -6   4 -21  180.16    3.03   0
  -4   0 -18    6.36    1.25   0
  -3  -1 -16  163.73    1.84   0
  -3  -1 -15   22.98    0.99   0
  -3   1 -24  110.24    2.21   0
  -1  -1 -19   19.14    1.21   0
  -1   1 -26   51.70    1.80   0
  -6   4 -20   83.39    2.36   0
  -5   1 -16   14.28    1.39   0
  -4   0 -17    3.40    1.32   0
  -4   0 -16  211.53    2.30   0
  -4   2 -24   46.08    1.99   0
  -3  -1 -14   18.11    0.92   0
  -3  -1 -13  377.36    2.37   0
  -3   3 -28   65.50    2.27   0
  -2   0 -22    1.19    1.35   0
  -2   2 -27   31.43    1.81   0
  -2   4 -30    4.27    1.88   0
  -1  -1 -18    7.15    0.96   0
  -1   3 -29    7.74    1.51   0
   0   0 -22    5.49    0.99   0
  -5   1 -14   73.63    1.59   0
  -5   1 -13  335.08    2.73   0
  -5   3 -22    8.90    1.85   0
  -4   0 -15    1.80    1.20   0
  -4   2 -23   44.54    1.93   0
  -4   4 -27    0.48    1.97   0
  -3  -1 -12 1809.65    4.84   0
  -3  -1 -11    7.52    0.81   0
  -3   1 -23   10.72    1.64   0
  -1  -1 -17   36.79    1.09   0
  -1   1 -25   51.33    1.67   0
  -6   4 -19   41.92    2.01   0
  -5   1 -12  783.22    3.93   0
  -5   1 -11   26.75    1.20   0
  -5   1 -10  372.56    2.61   0
  -5   1  -9    1.68    0.93   0
  -4   0 -14 1157.36    4.45   0
  -4   0 -13    0.05    1.01   0
  -4   0 -12  802.86    3.62   0
  -3   3 -27    1.54    1.86   0
  -2   0 -21   -0.03    1.01   0
  -2   2 -26   85.43    2.08   0
  -1  -1 -16  371.32    2.22   0
   0   0 -21   -1.55    0.93   0
  -6   4 -18   67.18    2.08   0
  -5   3 -21   59.08    2.04   0
  -4   0 -11   -0.86    0.90   0
  -4   0 -10 1486.63    4.47   0
  -4   0  -9   -0.19    0.71   0
  -4   2 -22    9.96    1.68   0
  -4   4 -26  210.18    3.17   0
  -3   3 -26   71.57    2.25   0
  -2   0 -20  104.52    1.72   0
  -2   4 -29    2.61    1.76   0
  -1  -1 -15  100.75    1.31   0
  -6   4 -17  167.06    2.56   0
  -6   6 -21  422.16    3.98   0
  -4   2 -21   21.53    1.64   0
  -2   0 -19    1.13    1.10   0
  -2   2 -25   57.70    1.91   0
  -1   1 -23   87.97    1.92   0
  -1   5 -30   31.76    1.83   0
   0   0 -20   33.99    1.13   0
  -6   4 -16  148.68    2.46   0
  -6   6 -20   99.89    2.50   0
  -5   3 -19   34.85    1.85   0
  -4   4 -25   38.58    2.11   0
  -3   1 -20   13.05    1.30   0
  -3   3 -25   11.76    1.78   0
  -3   5 -28   22.20    2.14   0
  -1   3 -27   49.46    1.88   0
   0   0 -19    1.96    0.79   0
  -5   3 -18   40.25    1.80   0
  -4   4 -24    8.66    1.87   0
  -2   0 -18   14.44    1.09   0
  -2   2 -24   14.90    1.55   0
  -1   1 -22  134.41    1.95   0
  -1   5 -29  141.30    2.53   0
  -6   6 -19   44.71    2.18   0
  -5   5 -22   55.66    2.28   0
  -4   6 -26   17.96    2.01   0
  -3   1 -19    2.97    1.33   0
  -3   3 -24   13.49    1.69   0
  -3   5 -27   60.65    2.25   0
  -2   0 -17    1.53    0.78   0
  -2   4 -27   -2.03    1.67   0
  -1   3 -26    4.26    1.41   0
   0   0 -18   41.60    1.06   0
   0   2 -24   25.92    1.52   0
  -6   6 -18    2.83    1.74   0
  -4   2 -18   33.77    1.49   0
  -4   4 -23    7.46    1.99   0
  -3   1 -18    3.97    1.03   0
  -2   0 -16  218.25    1.85   0
  -1   1 -21  136.95    1.90   0
   0   0 -17    0.51    0.76   0
  -5   5 -21    6.51    1.80   0
  -4   2 -17  220.52    2.43   0
  -4   6 -25   60.07    2.31   0
  -3   1 -17   37.47    1.28   0
  -3   3 -23   85.19    2.12   0
  -2   0 -15   -0.58    0.71   0
  -2   4 -26  192.35    2.75   0
  -1   3 -25   33.05    1.63   0
  -1   5 -28    0.49    1.74   0
   0   2 -23  346.15    2.70   0
  -5   3 -15    9.41    1.40   0
  -5   5 -20   23.93    1.87   0
  -4   4 -22  211.29    2.86   0
  -2   0 -14 3135.53    6.21   0
  -2   2 -22  158.64    2.23   0
  -1   1 -20   38.32    1.36   0
  -5   3 -14  120.38    1.98   0
  -5   3 -13  113.46    1.97   0
  -5   7 -22   17.79    1.99   0
  -4   2 -16  164.07    2.08   0
  -4   4 -21   58.78    2.08   0
  -4   6 -24    1.08    1.93   0
  -3   1 -16  173.59    1.87   0
  -3   3 -22    4.17    1.43   0
  -3   5 -25   70.67    2.30   0
  -2   2 -21    1.64    1.21   0
  -2   4 -25   10.45    1.70   0
  -1   5 -27   17.22    1.89   0
   0   4 -26  271.17    2.86   0
  -5   5 -19  300.22    3.26   0
  -4   2 -15  314.33    2.60   0
  -3   1 -15   23.36    1.03   0
  -2   6 -27  231.39    3.16   0
  -1   1 -19   15.96    1.06   0
   0   2 -22   19.10    1.15   0
  -5   5 -18   21.15    1.89   0
  -5   7 -21   76.30    2.33   0
  -4   2 -14  304.55    2.51   0
  -4   4 -20   33.69    1.73   0
  -4   6 -23   40.26    2.18   0
  -3   1 -14   17.56    0.89   0
  -3   5 -24   18.99    1.79   0
  -3   7 -26    4.84    1.84   0
  -2   2 -20   -0.78    1.25   0
  -2   4 -24  135.64    2.45   0
  -1   1 -18    4.99    0.96   0
  -1   7 -28  122.91    2.61   0
   0   4 -25  203.70    2.44   0
  -5   5 -17  167.67    2.53   0
  -4   2 -13   25.67    1.35   0
  -3   3 -20  408.10    3.22   0
  -2   6 -26   58.01    2.21   0
  -1   5 -26    6.59    1.45   0
   0   2 -21  450.27    2.85   0
  -5   7 -20   51.64    2.13   0
  -4   2 -12   11.99    1.04   0
  -4   6 -22   42.07    2.27   0
  -3   1 -12 1809.51    4.78   0
  -3   5 -23   54.83    2.01   0
  -3   7 -25   14.50    2.01   0
  -2   2 -19  987.30    4.15   0
  -2   4 -23  335.45    3.05   0
  -1   1 -17   36.55    1.08   0
  -5   5 -16   49.97    1.80   0
  -5   7 -19  463.67    4.10   0
  -4   2 -11  920.37    3.70   0
  -3   1 -11    6.23    0.74   0
  -3   3 -19   29.94    1.44   0
  -1   3 -22  428.99    3.11   0
  -1   5 -25  485.74    3.73   0
  -1   7 -27   71.02    2.33   0
   0   2 -20   54.32    1.25   0
  -4   2 -10  205.86    1.84   0
  -4   8 -23   18.55    2.05   0
  -3   5 -22    2.75    1.67   0
  -2   2 -18  117.64    1.69   0
  -2   6 -25    5.64    1.75   0
  -1   1 -16  379.07    2.27   0
   0   6 -26  163.43    2.46   0
  -5   5 -14   47.59    1.73   0
  -5   7 -18   33.41    1.84   0
  -4   4 -17  165.69    2.29   0
  -3   3 -18  422.41    2.89   0
  -3   7 -24   20.66    1.98   0
  -2   8 -26   93.23    2.59   0
  -1   3 -21  636.48    3.57   0
  -1   5 -24    4.05    1.78   0
  -1   7 -26   31.04    2.31   0
   0   2 -19  801.01    3.35   0
   0   4 -23  294.69    2.69   0
  -5   5 -13    9.55    1.72   0
  -5   7 -17   16.83    1.75   0
  -5   9 -19   24.90    2.22   0
  -4   4 -16  338.10    2.83   0
  -4   6 -20    2.45    1.75   0
  -4   8 -22   10.88    2.02   0
  -3   3 -17   39.00    1.39   0
  -3   5 -21   11.56    1.55   0
  -2   2 -17  240.58    1.96   0
  -2   6 -24   87.26    2.26   0
  -1   1 -15   97.61    1.23   0
  -3   7 -23   42.87    2.16   0
  -3   9 -24   10.20    1.95   0
  -2   2 -16   16.80    0.90   0
  -2   4 -21   17.05    1.61   0
  -2   8 -25    8.44    1.90   0
  -1   3 -20  822.51    3.84   0
   0   6 -25   52.65    1.82   0
  -5   5 -12  258.49    2.60   0
  -5   7 -16  167.37    2.71   0
  -5   9 -18    5.21    2.01   0
  -4   4 -15   10.04    1.19   0
  -4   8 -21    6.44    1.88   0
  -3   3 -16    3.59    0.94   0
  -2   6 -23   42.21    2.04   0
  -1   5 -23   19.49    1.48   0
  -1   7 -25  334.43    3.50   0
  -1   9 -26    7.06    1.99   0
   0   2 -18   42.01    1.03   0
   0   4 -22    1.67    1.16   0
   0   8 -26   79.55    2.25   0
  -5   5 -11   46.63    1.46   0
  -5   7 -15  171.39    2.66   0
  -5   9 -17   56.81    2.34   0
  -4   4 -14  109.83    1.89   0
  -4   6 -18    3.02    1.57   0
  -4   8 -20    6.50    1.89   0
  -3   7 -22  174.60    2.79   0
  -2   2 -15   56.24    1.12   0
  -2   4 -20  204.77    2.40   0
  -1   3 -19   22.28    1.13   0
   0   6 -24   53.26    1.88   0
  -5   5 -10   25.32    1.24   0
  -3   3 -15  111.41    1.46   0
  -3   9 -23   10.22    2.17   0
  -2   6 -22    0.15    1.57   0
  -2   8 -24    5.03    1.88   0
  -1   7 -24  283.31    3.27   0
   0   2 -17  170.42    1.59   0
   0   4 -21  322.38    2.62   0
  -5   7 -14  116.24    2.27   0
  -5   9 -16   44.71    2.12   0
  -4   4 -13   57.96    1.56   0
  -4   6 -17   33.15    1.70   0
  -4   8 -19    1.79    1.71   0
  -4  10 -20   96.31    2.57   0
  -3   3 -14  502.53    2.89   0
  -3   7 -21   52.67    2.09   0
  -2   2 -14  120.35    1.42   0
  -2   4 -19  503.51    3.31   0
  -1   9 -25   78.65    2.40   0
   0   8 -25   40.78    1.80   0
  -5   7 -13    4.50    1.57   0
  -4   4 -12  167.94    1.95   0
  -3   5 -18  106.51    1.93   0
  -3   9 -22    1.90    1.91   0
  -2   8 -23   22.13    1.96   0
  -1   3 -18    3.76    1.05   0
   0   2 -16   44.60    0.94   0
   0   6 -23  203.81    2.66   0
  -5   9 -15   -0.61    1.74   0
  -4   4 -11   67.62    1.60   0
  -4   8 -18  327.90    3.44   0
  -4  10 -19    6.70    2.02   0
  -3   3 -13  139.96    1.65   0
  -3   7 -20  282.84    3.25   0
  -2   2 -13  157.67    1.52   0
  -2   4 -18  900.18    4.08   0
  -2   6 -21    3.21    1.44   0
  -1   5 -21   11.97    1.52   0
   0   4 -20  469.83    2.92   0
   1   3 -18   27.27    0.96   0
  -5   9 -14  244.92    3.09   0
  -5  11 -15  125.05    2.58   0
  -4   6 -15  131.93    2.26   0
  -3   5 -17    9.20    1.43   0
  -3   9 -21    8.67    1.98   0
  -2   8 -22   29.36    1.99   0
  -1   3 -17  124.10    1.62   0
  -1   9 -24    1.34    1.95   0
   0   8 -24   34.31    1.86   0
  -5   7 -11    7.17    1.61   0
  -5  11 -14   43.18    2.10   0
  -4   8 -17    0.75    1.71   0
  -4  10 -18   19.56    2.15   0
  -3   7 -19  116.05    2.33   0
  -2   4 -17   26.20    1.13   0
  -1   5 -20  190.06    2.30   0
  -5   9 -13  231.12    2.90   0
  -4   4  -9   92.94    1.42   0
  -4   6 -14   -1.72    1.40   0
  -3   3 -11  111.55    1.49   0
  -3   5 -16    0.96    1.14   0
  -2  10 -22    9.38    1.96   0
  -1   3 -16  100.17    1.49   0
  -1   9 -23    6.19    1.90   0
   0   4 -19   25.29    1.09   0
   0   8 -23   25.90    1.83   0
   0  10 -24   -2.58    2.00   0
   1   3 -17   19.68    0.90   0
  -5   9 -12   43.72    1.85   0
  -4   8 -16  334.08    3.32   0
  -4  10 -17  345.90    3.93   0
  -3   7 -18   38.61    1.79   0
  -3  11 -20    9.31    2.04   0
  -2   4 -16  906.03    3.87   0
  -2   8 -21    2.76    1.70   0
   1   5 -20   17.72    1.25   0
  -4   4  -8  235.25    1.94   0
  -4   6 -13   23.94    1.46   0
  -3   3 -10   11.85    0.90   0
  -3   5 -15   12.91    1.11   0
  -3   9 -19  107.22    2.50   0
  -1   5 -19   74.40    1.70   0
  -1   7 -21    0.82    1.51   0
   0   4 -18 1047.10    3.99   0
  -4   4  -7  513.74    2.65   0
  -4   8 -15   42.37    1.86   0
  -3  11 -19  115.35    2.70   0
  -2   4 -15    2.12    0.90   0
  -2   8 -20   14.15    1.74   0
  -2  10 -21    1.57    1.95   0
  -1   3 -15    7.56    0.83   0
  -1   9 -22   56.99    2.18   0
   0   8 -22    5.36    1.44   0
   0  10 -23    8.82    1.93   0
   1   3 -16  212.62    1.68   0
  -4   6 -12   14.41    1.33   0
  -3   5 -14  139.56    1.91   0
  -3   9 -18   20.61    1.94   0
  -2   6 -18  158.66    2.07   0
  -1   5 -18   13.35    1.25   0
  -1  11 -22    3.64    1.89   0
   0   6 -20    4.79    1.20   0
   1   5 -19  149.68    1.83   0
  -4   6 -11   55.04    1.51   0
  -4  10 -15  120.81    2.56   0
  -4  12 -15   12.93    2.16   0
  -3  11 -18   -0.41    2.03   0
  -2   8 -19    2.39    1.63   0
  -2  10 -20    1.68    1.83   0
  -1   3 -14  198.49    1.67   0
  -1   9 -21   59.22    2.05   0
   0   4 -17    4.89    0.87   0
   0  10 -22   21.99    1.97   0
  -3   5 -13   97.43    1.67   0
  -3   9 -17    3.85    1.80   0
  -2   4 -14   13.78    0.87   0
  -2   6 -17  200.88    2.28   0
  -1  11 -21    2.40    1.90   0
   0   8 -21   22.67    1.62   0
  -4   6 -10    3.60    1.07   0
  -4  10 -14  377.83    3.66   0
  -4  12 -14   63.25    2.40   0
  -3   7 -15    1.81    1.33   0
  -3  11 -17   10.95    2.01   0
  -2  10 -19   10.89    1.90   0
  -1   5 -17   12.09    1.09   0
   0   6 -19    5.09    1.23   0
   1   5 -18   17.97    1.05   0
  -3   5 -12  274.15    2.21   0
  -3   9 -16  575.41    4.13   0
  -2   4 -13   25.87    0.93   0
  -2   6 -16   24.13    1.26   0
  -2   8 -18 1069.61    5.11   0
  -2  12 -19   34.25    2.19   0
  -1   9 -20   35.73    1.92   0
   0   4 -16  221.42    1.84   0
   0  10 -21   24.27    1.89   0
   0  12 -21  117.02    2.71   0
   1   9 -21   33.33    1.74   0
  -4   6  -9  450.52    2.87   0
  -4  10 -13    2.56    1.73   0
  -4  12 -13    0.44    2.00   0
  -3  11 -16  128.51    2.69   0
  -1  11 -20    3.29    1.95   0
   0   8 -20  122.37    2.13   0
   1  11 -21   22.90    1.91   0
  -4   6  -8    3.55    0.93   0
  -4   8 -11   52.48    1.69   0
  -4  10 -12  133.07    2.43   0
  -4  12 -12   89.10    2.78   0
  -3   5 -11  316.20    2.31   0
  -3   7 -14  496.63    3.21   0
  -2   4 -12  136.77    1.48   0
  -2  10 -18  199.91    2.89   0
  -2  12 -18   19.91    2.20   0
  -1   7 -18   -0.34    1.26   0
  -1   9 -19   15.69    1.79   0
   0   6 -18  374.72    2.71   0
  -3   9 -15  171.19    2.51   0
  -3  13 -15   63.67    2.38   0
  -2   6 -15  497.93    3.01   0
  -1  11 -19   62.10    2.32   0
   0   4 -15  197.33    1.71   0
   0  12 -20    7.98    1.89   0
   1   5 -17   80.66    1.33   0
   1   7 -19  397.12    2.95   0
   1   9 -20   46.15    1.90   0
  -4   6  -7 1036.40    3.98   0
  -4   8 -10  123.42    2.00   0
  -4  10 -11   45.78    1.91   0
  -4  12 -11   89.95    2.34   0
  -3   5 -10    4.75    0.96   0
  -3   7 -13   47.58    1.55   0
  -3  11 -15   37.89    2.06   0
  -2  10 -17  289.34    3.23   0
  -2  12 -17   12.31    2.12   0
  -1   5 -15  612.93    3.05   0
  -1   7 -17  247.39    2.52   0
   1  11 -20   79.92    2.04   0
  -3   9 -14  128.10    2.22   0
  -3  13 -14   35.52    2.16   0
  -2   4 -11  177.87    1.55   0
  -2   6 -14   76.17    1.43   0
  -1   9 -18    5.22    1.53   0
  -1  13 -18   -1.03    1.82   0
   0  10 -19   85.29    2.15   0
   0  12 -19   42.16    2.04   0
  -4   6  -6   32.68    1.09   0
  -4   8  -9    8.81    1.27   0
  -4  10 -10   23.45    1.91   0
  -4  12 -10   92.89    2.30   0
  -3   5  -9   60.30    1.14   0
  -3   7 -12    4.71    1.22   0
  -3  11 -14   37.14    1.95   0
  -2  10 -16   10.90    1.78   0
  -2  12 -16   11.09    2.01   0
   0   4 -14    2.88    0.67   0
   1   5 -16    7.85    0.79   0
   1   7 -18   46.80    1.44   0
   1   9 -19    4.82    1.66   0
  -4   6  -5    2.72    1.00   0
  -4   8  -8   21.35    1.26   0
  -3  13 -13   73.37    2.40   0
  -2   8 -15  149.30    2.19   0
  -1   5 -14  564.01    2.80   0
  -1   7 -16 1059.18    4.46   0
  -1   9 -17   95.38    2.01   0
  -1  13 -17   18.79    1.90   0
   1  11 -19   26.15    1.85   0
  -4  10  -9   65.76    1.91   0
  -4  12  -9   21.31    1.73   0
  -3   5  -8    7.21    0.85   0
  -3   7 -11   63.91    1.51   0
  -3  11 -13   29.35    1.88   0
  -3  13 -12  170.97    3.18   0
  -2  12 -15    4.73    1.86   0
  -1  11 -17    4.21    1.74   0
   0   6 -16   50.04    1.38   0
   0  10 -18  379.30    3.36   0
   0  12 -18    6.17    2.07   0
   1  13 -18    6.03    2.14   0
  -4   8  -7    3.87    1.06   0
  -4  12  -8  181.79    2.59   0
  -2   8 -14   94.09    1.79   0
  -2  10 -15   89.95    2.15   0
  -1  13 -16   22.91    1.97   0
   0   8 -17  254.46    2.55   0
   1   9 -18  249.14    2.71   0
  -3   7 -10   94.88    1.61   0
  -3  11 -12  584.64    4.17   0
  -3  13 -11    5.96    1.94   0
  -2   6 -12  280.07    2.10   0
  -1   5 -13   98.58    1.19   0
  -1   7 -15  227.40    2.19   0
   1  11 -18    2.18    1.63   0
  -4   8  -6   66.43    1.37   0
  -4  12  -7  182.77    2.57   0
  -3   9 -11    9.27    1.50   0
  -2  10 -14  411.27    3.34   0
  -2  12 -14  221.76    2.99   0
  -2  14 -13    0.94    1.83   0
  -1  11 -16   25.22    1.83   0
   0   6 -15  785.46    3.38   0
   0  10 -17   51.95    1.88   0
   1  13 -17   -1.08    1.92   0
  -3   7  -9  294.97    2.38   0
  -3  11 -11  135.81    2.42   0
  -3  13 -10   43.95    2.10   0
  -2   8 -13  223.46    2.34   0
  -1   5 -12   92.30    1.19   0
  -1   7 -14  457.78    2.82   0
   0   8 -16  538.80    3.34   0
   1   7 -16  108.36    1.63   0
  -3   9 -10    0.71    1.36   0
  -2   6 -11   64.85    1.04   0
  -2  10 -13   45.27    1.73   0
  -2  12 -13  110.56    2.44   0
  -2  14 -12   -0.46    1.84   0
  -1  11 -15   50.40    1.90   0
   0  14 -15    3.04    1.94   0
   1   5 -14  272.27    1.88   0
   1  11 -17   71.62    2.01   0
  -3  11 -10  252.63    2.85   0
  -3  13  -9    7.76    1.81   0
  -2   8 -12  266.23    2.34   0
  -1  13 -14  100.45    2.57   0
   0   6 -14  262.62    1.98   0
   0  10 -16   32.22    1.66   0
  -3   9  -9    1.69    1.29   0
  -2   6 -10   27.62    0.92   0
  -2  12 -12   23.87    2.10   0
  -2  14 -11   30.24    2.03   0
  -1   5 -11   63.53    1.07   0
  -1   7 -13  251.22    2.07   0
  -1   9 -14   92.03    1.86   0
  -1  11 -14  132.86    2.35   0
   0   8 -15  620.82    3.41   0
   1   7 -15  477.05    2.75   0
   1  11 -16   11.25    1.60   0
  -3  11  -9   15.65    1.57   0
  -3  13  -8  135.18    2.64   0
   0  10 -15   95.96    1.98   0
   0  12 -15    1.21    1.65   0
   0  14 -14    2.14    1.77   0
   1   5 -13   20.96    0.94   0
   1  13 -15   90.84    2.32   0
   2  10 -16   46.96    1.69   0
  -3   7  -7  192.57    1.79   0
  -3   9  -8   11.23    1.17   0
  -2   8 -11   44.70    1.27   0
  -2  12 -11   87.19    2.31   0
  -2  14 -10   30.89    2.05   0
   0   6 -13   17.66    0.95   0
  -3  11  -8  126.71    2.22   0
  -3  13  -7    1.34    1.73   0
  -2   6  -9  278.27    1.93   0
  -1   7 -12   78.51    1.31   0
  -1   9 -13   45.73    1.44   0
  -1  11 -13   12.71    1.59   0
   0   8 -14    0.52    1.18   0
   0  12 -14  202.56    2.76   0
   0  14 -13    7.02    1.86   0
   1  11 -15    2.97    1.45   0
   2   8 -15   20.59    1.23   0
   2  12 -15  111.49    2.13   0
  -3   7  -6   33.89    1.07   0
  -3  13  -6   31.10    1.89   0
  -2   8 -10   83.59    1.46   0
  -2  12 -10  412.65    3.55   0
  -2  14  -9  129.56    2.64   0
  -1  15 -10  203.68    3.01   0
   1   7 -14  817.18    3.44   0
   1  13 -14  220.29    2.96   0
   2  10 -15  147.74    2.13   0
  -3   9  -7    9.06    1.20   0
  -3  11  -7   20.37    1.60   0
  -2  10 -10  236.95    2.54   0
  -2  14  -8    6.15    1.83   0
  -1   9 -12   47.16    1.52   0
  -1  11 -12  273.32    2.75   0
   0   6 -12  571.18    2.66   0
   0  14 -12    2.77    1.81   0
  -3  13  -5  158.11    2.58   0
  -2   6  -8    4.09    0.69   0
  -2  12  -9   53.36    1.96   0
  -1   7 -11  128.54    1.52   0
  -1  13 -11   30.66    2.01   0
  -1  15  -9    1.62    1.87   0
   0   8 -13   39.99    1.27   0
   0  12 -13   14.22    1.75   0
   1   9 -14  196.86    2.16   0
   1  11 -14    2.33    1.51   0
   2   6 -13    4.12    0.75   0
   2   8 -14   12.60    1.04   0
   2  12 -14   57.50    1.84   0
   2  14 -13    8.89    1.83   0
  -3   7  -5  451.84    2.45   0
  -2   8  -9   13.00    1.12   0
  -2  14  -7   26.12    2.07   0
   0  14 -11  348.15    3.53   0
   1   7 -13   31.26    1.04   0
  -7  -9  23   78.61    2.76   0
  -7  -7  25  144.14    3.30   0
  -6  -8  24    1.74    2.62   0
  -6  -6  26   12.29    2.40   0
  -6  -2  27   12.42    2.67   0
  -5  -1  26    8.88    2.55   0
  -5   1  25    1.44    2.87   0
  -3  -5  23    1.29    2.25   0
  -8  -2  26   20.96    2.64   0
  -7  -5  26    7.02    2.61   0
  -6   0  26  270.62    3.94   0
  -5  -9  22    9.27    2.39   0
  -4  -8  22   -3.14    2.30   0
  -4  -6  24    5.53    2.42   0
  -4  -4  25   18.13    2.71   0
  -4  -2  25   23.55    2.72   0
  -4   2  23   65.09    2.46   0
  -3  -1  23   85.56    2.37   0
  -8   0  25    1.09    2.42   0
  -7  -9  22   -0.59    2.55   0
  -7  -3  26   32.30    2.68   0
  -7  -1  26  130.80    3.38   0
  -6  -6  25  129.26    3.29   0
  -6  -4  26   39.94    2.91   0
  -6  -2  26   79.57    3.00   0
  -4   0  24  206.25    3.37   0
  -3  -7  21   53.04    2.38   0
  -3  -3  23  291.52    3.59   0
  -8  -6  24   18.56    2.59   0
  -8  -4  25    4.44    2.71   0
  -8  -2  25   -0.08    2.59   0
  -7  -7  24    7.78    2.92   0
  -6  -8  23   75.78    2.97   0
  -5  -1  25    4.81    2.44   0
  -5   1  24  320.15    4.03   0
  -4  -8  21    3.39    2.32   0
  -4  -6  23    1.93    2.37   0
  -4  -4  24    0.90    2.61   0
  -4  -2  24   24.02    2.70   0
  -4   2  22   73.92    2.31   0
  -3  -5  22   31.59    2.25   0
  -7  -9  21   43.71    3.13   0
  -7  -1  25    6.96    2.78   0
  -6  -4  25    0.21    2.61   0
  -5  -3  25   25.70    2.98   0
  -4   0  23    2.65    2.12   0
  -3  -7  20  282.85    3.52   0
  -3  -3  22   20.66    2.05   0
  -3  -1  22  153.90    2.70   0
  -8   0  24   20.66    2.82   0
  -7  -7  23   13.79    2.97   0
  -7  -3  25   72.40    3.08   0
  -6  -8  22   21.95    2.80   0
  -6  -6  24   -0.09    2.54   0
  -5  -5  24   43.93    3.07   0
  -4  -6  22  110.52    3.09   0
  -4  -4  23    6.57    2.66   0
  -3  -5  21   45.33    2.16   0
  -8  -8  21   74.26    3.02   0
  -8  -6  23   58.35    2.95   0
  -8  -4  24   37.14    2.87   0
  -8  -2  24    6.88    2.95   0
  -7  -5  24   33.45    2.92   0
  -6   0  24   17.09    2.62   0
  -5  -7  22   75.10    3.00   0
  -5  -3  24    7.09    2.86   0
  -5  -1  24  316.67    4.17   0
  -4  -8  20    7.02    2.44   0
  -4  -2  23   69.37    2.80   0
  -4   2  21   43.04    2.09   0
  -3  -7  19   -3.06    1.97   0
  -8   0  23   -0.04    2.93   0
  -7  -9  20  115.54    3.39   0
  -7  -3  24   13.30    2.83   0
  -7  -1  24   91.11    3.28   0
  -7   1  23   12.49    2.40   0
  -6  -8  21    1.64    3.09   0
  -6  -6  23   52.93    3.23   0
  -5  -5  23   62.69    3.18   0
  -4   0  22  223.96    3.37   0
  -3  -5  20   -1.59    1.78   0
  -9  -1  22   73.33    3.06   0
  -8  -8  20    6.90    3.37   0
  -8  -6  22    2.86    2.71   0
  -7  -7  22   68.47    3.16   0
  -7  -5  23   37.69    3.56   0
  -5  -9  19   10.93    2.59   0
  -5  -1  23    7.15    2.63   0
  -5   1  22  228.65    3.89   0
  -4  -8  19    1.09    2.46   0
  -4  -6  21   19.61    2.60   0
  -4  -4  22   14.39    2.56   0
  -4  -2  22   74.73    2.87   0
  -9  -3  22    8.83    2.77   0
  -7  -9  19   85.15    3.08   0
  -6   0  23    1.17    2.69   0
  -5  -7  21   38.49    2.82   0
  -5  -3  23   78.08    3.27   0
  -8   0  22  167.05    3.77   0
  -7  -3  23   50.36    3.25   0
  -7  -1  23   10.73    2.95   0
  -6  -2  23   70.20    3.33   0
  -5  -5  22   35.38    3.01   0
  -4  -8  18  195.12    3.37   0
  -4  -6  20    0.90    2.30   0
  -4  -4  21   15.94    2.42   0
  -4   0  21   -2.19    1.86   0
  -9  -3  21   17.53    2.83   0
  -9  -1  21    2.77    2.61   0
  -8  -8  19   15.41    2.79   0
  -8  -6  21   25.11    2.64   0
  -8  -4  22   23.47    2.78   0
  -8  -2  22    8.66    2.87   0
  -7  -9  18    8.62    2.97   0
  -7  -5  22   19.85    3.10   0
  -6   0  22  632.60    5.44   0
  -5  -7  20  326.72    4.25   0
  -5  -3  22   19.72    2.76   0
  -5  -1  22  212.74    3.71   0
  -5   1  21  234.14    3.69   0
  -4  -2  21   41.87    2.39   0
  -9  -5  20    1.34    2.83   0
  -7  -7  20   57.06    2.91   0
  -6  -4  22   44.26    3.36   0
  -5  -9  17   27.99    2.59   0
  -5  -5  21   17.88    2.99   0
  -4  -8  17   -1.64    2.14   0
  -4  -6  19   95.06    2.74   0
  -9  -7  18    4.00    2.84   0
  -9  -1  20   15.87    3.28   0
  -8  -8  18   97.83    3.27   0
  -8  -6  20   -0.05    2.52   0
  -8  -4  21    1.01    2.60   0
  -8   0  21    3.25    2.75   0
  -7  -5  21   12.15    2.71   0
  -7  -3  22   12.30    2.80   0
  -6  -2  22   86.12    3.35   0
  -5  -7  19    6.71    2.46   0
  -5  -1  21  224.15    3.60   0
  -4  -4  20    6.83    2.18   0
  -4  -2  20  410.41    3.99   0
  -9  -3  20   -6.20    3.00   0
  -8  -2  21   23.41    2.75   0
  -7  -9  17   40.91    2.75   0
  -6  -6  20   47.63    2.87   0
  -6  -4  21   19.20    3.05   0
  -6   0  21   -2.79    2.45   0
  -5  -5  20    5.62    2.57   0
  -5  -3  21  144.77    3.41   0
  -5   1  20   41.71    2.47   0
  -9  -7  17   60.25    2.78   0
  -8  -8  17   37.41    3.48   0
  -8   0  20  140.69    3.99   0
  -7  -7  19    2.39    2.55   0
  -6  -8  18  244.82    3.88   0
  -6  -2  21   23.20    2.69   0
  -4  -8  16  275.57    3.46   0
  -4  -6  18  108.76    2.62   0
  -4  -4  19    8.26    1.87   0
  -9  -3  19   56.42    3.01   0
  -9  -1  19   21.43    2.91   0
  -8  -6  19  106.31    3.09   0
  -8  -4  20  103.79    3.22   0
  -7  -9  16  162.62    3.37   0
  -7   1  20   28.09    2.79   0
  -5  -7  18    6.44    2.28   0
  -5  -3  20  124.35    2.97   0
  -5  -1  20   40.49    2.27   0
 -10  -2  17   28.41    2.69   0
  -9  -5  18   76.03    2.91   0
  -8  -2  20    7.06    2.60   0
  -7  -7  18   -3.93    2.32   0
  -6  -8  17    2.08    2.34   0
  -6  -6  19    2.17    2.56   0
  -6  -4  20  106.12    3.34   0
  -6   0  20  581.72    4.77   0
  -5  -5  19    5.45    2.40   0
  -5   1  19    4.70    2.07   0
  -4  -8  15  117.42    2.61   0
  -4  -6  17    6.11    1.70   0
 -10   0  16   13.48    2.62   0
  -9  -9  13    0.75    2.28   0
  -9  -7  16   34.11    2.69   0
  -8  -8  16  123.84    3.21   0
  -8  -6  18   40.37    2.59   0
  -8  -4  19   11.88    2.59   0
  -8   0  19   -5.09    2.51   0
  -7  -1  20   30.39    2.53   0
  -7   1  19    0.46    2.55   0
  -6  -2  20  172.85    3.44   0
  -5  -7  17   49.19    2.35   0
  -9  -5  17   82.72    2.86   0
  -9  -3  18    2.69    2.43   0
  -9  -1  18  147.78    3.55   0
  -9   1  17    2.39    2.35   0
  -8  -2  19   49.22    2.67   0
  -6  -8  16   62.07    2.64   0
  -6  -6  18   21.77    2.48   0
  -6   0  19    2.62    2.34   0
  -5  -5  18    1.22    2.16   0
  -5  -3  19  129.99    2.76   0
  -5  -1  19    8.41    1.79   0
 -10  -2  16   17.54    2.60   0
  -9  -9  12   31.05    2.27   0
  -9  -7  15  307.62    3.90   0
  -8  -8  15   -1.06    2.52   0
  -8  -6  17   94.21    2.99   0
  -7  -9  14   21.34    2.64   0
  -7  -3  19    0.42    2.63   0
  -7  -1  19    4.06    2.24   0
  -6  -4  19   83.57    2.49   0
  -6  -2  19  199.97    3.42   0
 -10  -4  15   50.99    2.65   0
 -10   0  15    6.16    2.24   0
  -9  -3  17   11.50    2.41   0
  -9  -1  17    3.34    2.49   0
  -8  -4  18   59.13    2.72   0
  -7  -5  18   15.25    2.69   0
  -7   1  18  388.29    4.16   0
  -5  -7  16  221.00    2.99   0
  -5  -3  18   38.35    2.05   0
 -10  -2  15   15.66    2.35   0
  -9  -9  11   20.79    2.29   0
  -9  -7  14  100.72    3.13   0
  -9  -5  16   32.48    2.50   0
  -9   1  16   71.46    2.50   0
  -8  -2  18    8.48    2.40   0
  -6  -8  15    2.21    2.24   0
  -6  -6  17   11.53    2.29   0
  -6  -4  18  363.14    3.94   0
  -6   0  18   31.69    1.98   0
  -6   2  17   74.81    2.23   0
  -5  -5  17   49.88    2.26   0
  -5  -1  18  299.81    3.15   0
 -10  -4  14   17.44    2.45   0
 -10   0  14  154.72    3.43   0
  -8  -4  17   76.07    2.78   0
  -7  -5  17   11.48    2.55   0
  -7  -3  18   24.85    2.63   0
  -7  -1  18  383.56    4.06   0
  -6  -2  18  237.13    3.36   0
  -5  -7  15   41.20    1.90   0
 -10  -6  12   -1.47    2.18   0
 -10  -2  14   47.19    2.62   0
  -9  -9  10   36.00    2.31   0
  -9  -5  15  264.45    3.50   0
  -9  -3  16    4.80    2.31   0
  -9  -1  16   72.92    2.86   0
  -9   1  15    9.57    2.61   0
  -8  -8  13   19.51    2.77   0
  -7  -7  15   78.73    2.71   0
  -6  -8  14   86.53    2.62   0
  -6  -6  16  278.35    3.51   0
  -5  -3  17   37.77    1.96   0
 -10  -4  13   95.26    2.81   0
  -8  -6  15   26.71    2.50   0
  -7  -3  17  100.95    2.95   0
  -6  -4  17   19.61    2.24   0
  -6   0  17    5.92    1.72   0
  -6   2  16   13.88    1.88   0
  -5  -7  14  876.56    4.97   0
  -5  -5  16   56.95    2.00   0
 -10   0  13   -1.73    2.26   0
  -9  -9   9   56.30    2.35   0
  -9  -7  12   51.34    2.67   0
  -9  -5  14   13.70    2.25   0
  -9  -3  15    4.19    2.33   0
  -9  -1  15    6.31    2.43   0
  -8   0  16   37.66    2.63   0
  -7  -5  16  107.38    2.97   0
  -7  -1  17    5.71    2.15   0
  -6  -8  13   17.44    2.10   0
  -6  -2  17   75.88    2.45   0
 -10  -2  13    3.56    2.53   0
  -9   1  14    5.33    2.19   0
  -8  -8  12   80.80    2.62   0
  -8  -6  14    1.13    2.25   0
  -7  -7  14  297.92    3.59   0
  -6  -6  15   30.12    2.24   0
  -6  -4  16   30.35    2.18   0
  -5  -5  15    4.04    1.54   0
  -5  -3  16  292.01    3.03   0
 -10  -4  12   24.46    2.24   0
 -10   0  12  131.20    2.88   0
  -9  -9   8   11.20    2.24   0
  -9  -5  13   17.56    2.30   0
  -9  -3  14   28.85    2.44   0
  -7  -5  15   64.26    2.69   0
  -7  -3  16  118.06    2.90   0
  -7  -1  16   20.88    2.21   0
  -6  -2  16   15.12    1.99   0
  -6   0  16  214.88    2.79   0
  -6   2  15    5.47    1.52   0
  -5  -7  13   56.22    2.01   0
 -10  -2  12   53.52    2.77   0
  -9  -7  11  103.90    2.94   0
  -9  -1  14    7.73    2.28   0
  -9   1  13   23.50    2.65   0
  -8  -2  15   -1.65    2.29   0
  -8   0  15    0.26    2.13   0
  -7  -9  10   48.73    2.24   0
  -7  -7  13   33.76    2.25   0
  -6  -8  12  224.61    3.08   0
  -6  -6  14   -0.34    1.91   0
 -10  -4  11   94.21    2.60   0
  -7  -3  15   11.17    2.26   0
  -6  -4  15    1.22    1.77   0
  -5  -7  12   22.53    1.93   0
  -5  -5  14    4.09    1.48   0
 -10  -2  11  268.46    3.64   0
 -10   0  11    6.68    2.30   0
  -9  -7  10   24.12    2.34   0
  -9  -5  12    3.37    2.24   0
  -9  -3  13   64.47    2.62   0
  -8  -8  10   41.65    2.30   0
  -8   0  14   19.94    2.21   0
  -7  -9   9   18.62    1.90   0
  -7  -7  12    7.35    2.06   0
  -7  -5  14    6.40    2.22   0
  -7  -1  15   50.74    2.36   0
  -6  -8  11   99.47    2.45   0
  -6  -2  15    6.41    1.71   0
  -6   0  15    2.64    1.52   0
 -10  -6   8   12.92    2.48   0
 -10  -4  10   69.28    2.55   0
  -9   1  12   11.99    2.24   0
  -8  -2  14   15.94    2.24   0
  -7   1  14   18.24    2.12   0
  -6  -6  13   94.70    2.35   0
  -6  -4  14  292.93    3.19   0
 -10   0  10   36.46    2.57   0
  -9  -7   9   42.44    2.52   0
  -9  -5  11  110.89    2.78   0
  -9  -3  12   30.15    2.39   0
  -9  -1  12   10.05    2.04   0
  -8  -8   9   34.86    2.46   0
  -8  -4  13   56.70    2.75   0
  -7  -9   8    1.24    2.10   0
  -7  -5  13    3.51    2.10   0
  -7  -3  14   78.83    2.48   0
  -6  -8  10  113.33    2.42   0
 -10  -4   9   85.66    2.53   0
  -8  -2  13    1.76    2.22   0
  -8   0  13    2.41    1.96   0
  -8   2  12  173.45    3.06   0
  -6  -6  12  177.47    2.66   0
  -6  -2  14  164.45    2.45   0
  -6   0  14   72.82    1.85   0
 -11  -1   6   47.19    2.16   0
 -10  -2   9  253.44    3.43   0
 -10   0   9    2.47    2.18   0
  -9  -7   8   36.39    2.34   0
  -9  -5  10  108.44    2.80   0
  -8  -4  12   75.29    2.80   0
  -7   1  13   23.35    1.98   0
  -6  -4  13    6.92    1.69   0
 -10  -6   6   14.74    2.38   0
 -10  -4   8   80.51    2.49   0
  -8  -6  10   87.35    2.66   0
  -8   0  12  573.97    4.20   0
  -7  -7  10   18.87    2.03   0
  -7  -5  12    7.84    1.61   0
  -7  -3  13  398.03    3.52   0
  -6  -8   9   71.86    2.15   0
 -11  -1   5   23.56    2.18   0
 -10   0   8   -3.72    2.27   0
  -9  -9   3   -0.85    2.03   0
  -9  -7   7   29.04    2.42   0
  -9  -5   9   65.59    2.66   0
  -9  -3  10   44.53    2.38   0
  -8  -4  11   55.22    2.60   0
  -8  -2  12  184.15    3.07   0
  -8   2  11  195.68    2.86   0
  -6  -6  11   62.81    1.98   0
  -6  -2  13   40.13    1.73   0
 -11  -3   4   16.86    2.26   0
 -10  -6   5    8.04    2.32   0
 -10  -4   7    5.65    2.08   0
 -10  -2   8  143.17    2.78   0
  -8  -6   9   29.12    2.24   0
  -7  -7   9   11.03    1.81   0
  -7  -5  11  107.60    2.60   0
  -7  -3  12    6.16    1.99   0
  -7   1  12   21.16    1.89   0
  -6  -8   8  291.65    3.06   0
  -6  -4  12  363.23    3.16   0
 -11  -1   4    2.85    2.27   0
 -10   0   7   -0.88    2.50   0
  -9  -9   2   48.40    2.44   0
  -9  -5   8   35.99    2.17   0
  -8  -2  11  199.07    3.11   0
  -8   0  11   -1.09    1.74   0
  -8   2  10   92.20    2.47   0
  -7  -1  12   20.69    1.80   0
  -6  -6  10   21.25    1.69   0
 -10  -4   6   34.39    2.23   0
 -10  -2   7    0.83    2.03   0
  -9  -9   1    0.98    2.15   0
  -8  -4  10   30.89    2.39   0
  -7  -7   8  107.98    2.34   0
  -7  -5  10   33.84    2.18   0
  -6  -8   7   -1.04    1.55   0
  -6  -4  11   92.20    2.01   0
  -9  -5   7    5.61    2.00   0
  -8  -6   8   30.18    2.18   0
  -8   0  10   87.46    2.55   0
  -7  -3  11    7.91    1.78   0
  -7   1  11    6.08    1.68   0
 -10  -2   6   -1.24    2.12   0
 -10   0   6   26.59    2.27   0
  -9  -7   4   42.48    2.38   0
  -8  -4   9  275.17    3.47   0
  -8  -2  10  104.61    2.69   0
  -8   2   9  591.61    4.22   0
  -7  -1  11    3.92    1.63   0
  -6  -6   9  100.55    2.07   0
 -11   1   1    6.37    1.83   0
 -10  -6   2   37.67    2.46   0
  -9  -5   6    0.78    1.99   0
  -7  -7   7   30.20    1.85   0
  -7  -5   9   80.35    2.30   0
  -7  -3  10    2.80    1.72   0
  -7   1  10   25.90    1.76   0
  -6  -8   6   75.53    1.93   0
  -6  -4  10  104.04    2.05   0
 -11  -1   1    6.49    2.19   0
 -10   0   5    3.46    2.01   0
  -9  -7   3    5.42    2.00   0
  -9   1   7  187.57    2.98   0
  -8  -4   8  241.82    3.29   0
  -8  -2   9  577.38    4.40   0
  -8   0   9    6.68    1.77   0
  -7  -1  10   27.56    1.72   0
  -6  -6   8  190.21    2.38   0
 -10  -4   3    0.06    1.99   0
  -9  -5   5   33.28    2.22   0
  -9  -1   7  183.06    3.06   0
  -8  -6   6   40.50    2.17   0
  -8   2   8  280.30    3.21   0
  -7  -7   6  554.23    3.99   0
  -7  -5   8   35.88    2.01   0
  -6  -8   5   18.61    1.49   0
 -10   0   4   31.58    2.26   0
 -10   2   3  142.64    2.58   0
  -9   1   6   10.17    2.05   0
  -8  -2   8  284.28    3.33   0
  -7  -3   9  182.85    2.59   0
  -7   1   9    3.08    1.57   0
 -10  -4   2   37.14    2.33   0
 -10  -2   3  146.04    2.90   0
  -9  -1   6   12.40    2.15   0
  -8  -6   5   28.19    2.22   0
  -8  -4   7    1.58    2.09   0
  -8   0   8    4.44    1.85   0
  -8   2   7   71.43    2.23   0
  -7  -7   5  131.33    2.48   0
  -7  -1   9    4.50    1.61   0
  -6  -8   4  229.96    2.73   0
  -6  -6   7   65.72    1.69   0
 -10   2   2    5.81    1.81   0
  -7  -3   8   12.53    1.64   0
 -11   1  -3   21.35    2.37   0
 -10  -2   2    8.89    2.13   0
  -9  -1   5  160.39    2.90   0
  -9   1   5  159.28    2.77   0
  -8  -2   7   72.79    2.37   0
  -8   0   7    1.13    1.83   0
  -7  -7   4  220.07    2.81   0
  -7   1   8  118.12    2.10   0
  -6  -6   6   39.91    1.50   0
 -10   2   1  144.17    2.63   0
  -9  -3   4    5.12    2.30   0
  -7  -5   6   58.46    1.99   0
  -7  -1   8  113.99    2.06   0
 -11  -1  -4   10.31    2.20   0
 -10  -2   1  148.27    2.92   0
  -9  -1   4  133.21    2.71   0
  -9   1   4  131.30    2.62   0
  -8  -6   3    8.71    1.89   0
  -8  -4   5   66.26    2.32   0
  -8  -2   6   21.77    2.07   0
  -7  -3   7   54.07    1.89   0
 -10   2   0   51.98    2.24   0
  -9  -3   3   -1.29    2.26   0
  -8   0   6    3.57    1.81   0
  -7  -5   5   31.16    1.80   0
  -7  -1   7   34.64    1.64   0
  -7   1   7   36.30    1.68   0
 -11  -1  -5   10.95    2.20   0
 -10   0   0  155.23    2.92   0
  -9   1   3   13.92    2.02   0
  -8  -6   2  180.84    2.80   0
  -8  -4   4  441.93    3.83   0
  -8  -2   5   67.46    2.30   0
  -8   2   5   66.54    2.08   0
  -7  -3   6  308.25    2.96   0
 -11  -1  -6   42.32    2.44   0
  -9  -3   2   96.37    2.88   0
  -8   0   5    2.05    1.80   0
  -7  -7   2   75.77    2.15   0
 -10  -6  -7   97.74    2.67   0
  -9   1   2  196.49    2.93   0
  -8  -6   1   83.89    2.35   0
  -8  -4   3   15.54    2.06   0
  -8   2   4  125.18    2.37   0
  -7  -5   4    2.15    1.55   0
  -7  -1   6   18.71    1.44   0
  -7   1   6   15.14    1.57   0
 -10  -6  -8   23.70    2.36   0
  -9  -7  -5    9.53    2.06   0
  -9  -3   1   -0.18    2.26   0
  -9  -1   2  193.97    3.01   0
  -8  -2   4  129.97    2.62   0
  -8   0   4   58.84    2.15   0
  -7  -7   1    0.28    1.76   0
  -7  -3   5  320.55    2.96   0
 -10  -6  -9  100.37    2.75   0
 -10  -4  -5   73.34    2.44   0
 -10   2  -3   68.00    2.32   0
  -9   1   1   22.81    2.09   0
  -8  -4   2  113.87    2.54   0
  -7  -5   3    3.12    1.51   0
 -10  -6 -11   44.04    2.14   0
 -10   0  -3    0.53    2.39   0
 -10   2  -4    4.43    2.23   0
  -9  -7  -6    2.62    2.01   0
  -8   2   3  182.63    2.58   0
  -7  -7   0  381.86    3.37   0
  -7  -3   4  105.30    2.05   0
  -7  -1   5   90.54    1.89   0
 -10  -4  -6  180.22    2.97   0
  -9  -7  -7   21.09    2.16   0
  -8  -6  -1    1.31    1.88   0
  -8   0   3   -0.30    1.71   0
  -7  -5   2    3.03    1.49   0
 -10   2  -5   78.85    2.27   0
  -8  -2   2   31.19    2.12   0
  -8   2   2   32.68    2.04   0
  -7  -7  -1   18.15    1.89   0
  -7  -1   4   10.61    1.40   0
 -10   2  -6  183.37    2.82   0
  -9  -3  -2    8.81    2.37   0
  -9  -1  -1  104.74    2.64   0
  -9   1  -1  103.09    2.54   0
  -8  -4   0   15.00    1.99   0
  -8   0   2   21.65    1.85   0
  -7  -3   3   62.23    1.84   0
 -10  -4  -9   11.22    2.10   0
  -9  -7 -10    4.30    2.31   0
  -8  -6  -3   37.29    2.12   0
  -8  -2   1  267.56    3.19   0
  -8   2   1  271.44    2.97   0
  -7  -7  -2   99.15    2.34   0
  -7  -5   1   22.79    1.62   0
 -10  -4 -11   59.05    2.60   0
 -10  -4 -10    1.95    2.19   0
 -10   2  -7   27.25    2.25   0
  -9  -7 -11  134.25    2.92   0
  -9  -5  -6   16.61    2.07   0
  -9  -1  -2  302.28    3.49   0
  -9   1  -2  312.00    3.44   0
  -9   3  -3   71.61    2.51   0
  -8  -4  -1    1.80    1.91   0
  -8   0   1    0.67    1.70   0
  -7  -3   2   34.13    1.63   0
 -10  -4 -12   23.55    2.50   0
 -10  -2  -8    0.96    2.02   0
 -10   0  -7    0.98    2.08   0
  -9  -7 -13  142.45    2.88   0
  -8  -6  -4    0.02    1.87   0
  -8  -2   0   70.80    2.35   0
  -7  -7  -3  217.28    2.84   0
  -7  -5   0    5.52    1.47   0
 -10  -4 -14   25.45    2.45   0
 -10  -4 -13    6.00    2.31   0
 -10   0  -8   79.00    2.56   0
 -10   2  -9    6.02    2.16   0
  -9  -7 -16    9.49    2.11   0
  -9  -7 -15   46.57    2.29   0
  -9  -7 -14   11.59    2.08   0
  -9  -5  -7    0.54    1.97   0
  -9  -1  -3   22.34    2.20   0
  -9   3  -4   28.72    1.90   0
  -8  -6  -5   92.30    2.31   0
  -8  -4  -2   74.50    2.36   0
  -8   0   0  548.34    3.97   0
  -8   2   0   69.89    2.21   0
  -7  -7  -4    9.92    1.82   0
 -10  -2 -11   -1.80    2.57   0
 -10  -2 -10  159.02    2.94   0
 -10   0  -9    0.50    2.32   0
  -7  -3   1  328.26    2.93   0
 -10  -2 -12    2.97    2.09   0
 -10   0 -10  468.11    4.23   0
 -10   2 -11    1.10    2.06   0
  -9   1  -4    4.20    1.87   0
  -8  -6  -6   21.24    1.84   0
  -8  -4  -3   71.40    2.39   0
  -8   2  -1    2.79    1.87   0
 -10  -2 -14    9.27    2.76   0
 -10  -2 -13   24.08    2.26   0
 -10   0 -11   -3.85    2.45   0
 -10   2 -12    1.08    2.21   0
  -9   1  -5    2.02    1.74   0
  -8  -6  -7  160.25    2.67   0
  -8  -2  -2   47.28    2.21   0
  -8   0  -1   -2.93    1.75   0
  -7  -5  -2  193.98    2.49   0
  -7  -3   0  329.91    2.98   0
 -10  -2 -16   -0.44    2.29   0
 -10   0 -13   -3.13    2.48   0
 -10   0 -12   28.54    2.55   0
 -10   2 -13   22.38    2.29   0
  -9  -1  -6    1.38    2.33   0
  -8  -4  -4   90.39    2.51   0
  -8   2  -2   45.78    2.08   0
  -7  -7  -6    4.50    1.76   0
 -10   0 -15    4.93    2.25   0
 -10   0 -14  563.32    4.56   0
 -10   2 -15   21.43    2.37   0
  -9  -5 -13  323.75    4.01   0
  -9  -5 -12   10.51    2.29   0
  -8  -6  -8   39.22    2.20   0
  -8  -4  -5   12.91    2.18   0
  -8   0  -2   58.72    2.08   0
  -7  -7  -7  120.27    2.40   0
  -7  -5  -3  125.54    2.27   0
  -7  -3  -1  175.39    2.37   0
 -10   0 -16   48.69    2.50   0
  -9  -5 -14    7.16    2.48   0
  -8  -6  -9   67.07    2.40   0
  -8   2  -3  128.75    2.50   0
  -9  -5 -17  183.70    3.40   0
  -8  -6 -10   80.83    2.61   0
  -8  -4  -6  413.31    3.94   0
  -8  -2  -4   11.10    2.23   0
  -8   0  -3    0.82    1.83   0
  -7  -7  -8   54.17    2.11   0
  -7  -5  -4    4.37    1.61   0
  -7  -3  -2   15.13    1.60   0
  -9  -5 -19  317.44    3.90   0
  -9  -5 -18   33.90    2.78   0
  -9   3  -9   28.64    2.07   0
  -8  -4  -7    6.23    2.15   0
  -8   0  -4  350.83    3.45   0
  -7  -7  -9  207.11    2.92   0
  -9   3 -10  160.42    2.81   0
  -8  -2  -5   31.65    2.10   0
  -7  -5  -5  380.19    3.31   0
  -7  -3  -3   89.44    2.01   0
  -9  -3 -14    2.03    2.25   0
  -9   3 -11    5.32    2.26   0
  -8  -4  -8   77.33    2.53   0
  -8  -2  -6  109.96    2.55   0
  -8   0  -5    1.47    1.96   0
  -7  -7 -10    5.53    1.99   0
  -7  -5  -6    1.81    1.64   0
  -9  -3 -15   28.21    2.39   0
  -9  -1 -12  346.22    3.90   0
  -9  -1 -11   15.75    2.28   0
  -9   1 -11   15.94    2.09   0
  -9   3 -12   10.09    2.33   0
  -8  -6 -15  123.55    2.89   0
  -8  -6 -14   22.45    2.26   0
  -8  -4  -9   62.92    2.45   0
  -7  -7 -11    4.84    2.01   0
  -7  -3  -4   18.87    1.62   0
  -9  -3 -21   96.29    3.17   0
  -9  -3 -19   50.49    3.15   0
  -9  -3 -18   32.11    2.62   0
  -9  -3 -17   49.75    2.75   0
  -9  -3 -16   47.69    2.59   0
  -9  -1 -13   16.58    2.35   0
  -9   1 -12  356.97    3.77   0
  -9   3 -13    9.65    2.36   0
  -8  -6 -22   14.33    2.49   0
  -8  -6 -18   49.80    3.10   0
  -8  -6 -17  368.36    4.06   0
  -8  -6 -16    4.39    2.29   0
  -8  -4 -10   29.61    2.31   0
  -8  -2  -7   23.26    2.10   0
  -8   0  -6   11.92    2.25   0
  -7  -7 -12    7.17    2.03   0
  -7  -1  -3   21.59    1.53   0
  -9  -1 -14  172.10    3.39   0
  -9   1 -13   14.18    2.14   0
  -9   3 -15   31.70    2.76   0
  -9   3 -14    4.30    2.20   0
  -8  -6 -21  219.71    3.33   0
  -8  -6 -19   23.49    2.84   0
  -8  -4 -11   62.49    2.46   0
  -8  -2  -8   43.38    2.42   0
  -8   2  -7   23.57    2.25   0
  -7  -7 -13  140.00    2.74   0
  -7  -3  -5  172.58    2.48   0
  -9  -1 -16  165.74    3.28   0
  -9  -1 -15    3.37    2.37   0
  -9   1 -14  170.17    3.09   0
  -9   3 -17   52.00    2.94   0
  -9   3 -16   48.55    2.47   0
  -8  -4 -12    2.69    2.16   0
  -8   0  -7   -0.94    2.01   0
  -7  -7 -14   71.51    2.29   0
  -7  -5  -8   -0.97    1.74   0
  -7  -1  -4  390.44    3.17   0
  -6  -6  -7  679.13    3.99   0
  -9  -1 -22    5.32    2.43   0
  -9  -1 -20    4.87    2.54   0
  -9  -1 -19   18.80    2.71   0
  -9  -1 -18  213.94    3.70   0
  -9  -1 -17    2.90    2.35   0
  -9   1 -16  169.55    3.30   0
  -9   1 -15    3.86    2.11   0
  -9   3 -20  190.88    3.41   0
  -9   3 -18   29.36    2.53   0
  -8  -2  -9  101.06    2.70   0
  -8   0  -8  346.82    3.63   0
  -8   2  -8   44.12    2.15   0
  -7  -5  -9  224.90    2.95   0
  -7  -3  -6   42.10    1.80   0
  -9   1 -22    7.16    2.57   0
  -9   1 -21   64.51    2.88   0
  -9   1 -19   18.65    2.75   0
  -9   1 -17    3.46    2.38   0
  -8  -2 -10  124.92    2.93   0
  -7  -5 -10  130.92    2.64   0
  -7  -1  -5    6.05    1.53   0
  -7   3  -5  178.61    2.38   0
  -6  -6  -8    1.87    1.52   0
  -8  -4 -16   98.20    2.82   0
  -8   0  -9    2.13    1.59   0
  -8   2  -9  103.77    2.51   0
  -8   4 -11   61.62    2.22   0
  -7  -3  -7   27.11    1.76   0
  -7   1  -5    5.97    1.44   0
  -8  -4 -24  129.72    3.14   0
  -8  -4 -17  143.35    3.09   0
  -8  -2 -12   21.80    2.48   0
  -8   0 -10  641.80    4.69   0
  -8   2 -10  121.58    2.46   0
  -7  -5 -11   24.17    2.01   0
  -7  -1  -6    9.63    1.59   0
  -7   3  -6   42.74    1.76   0
  -6  -6  -9    7.93    1.67   0
  -7  -3  -8   49.64    1.69   0
  -4  16   0  242.70    2.80   0
  -3  11  -7   20.19    1.25   0
  -3  17   1    9.86    2.07   0
  -2  14  -5   16.23    1.71   0
  -1  13  -6  109.86    2.12   0
   0  12  -6    1.82    1.26   0
   0  14  -4   19.00    1.77   0
   0  18   5   65.56    2.23   0
   1  15  -1   40.13    1.92   0
   1  17   4  173.77    2.69   0
   2  14   0   35.02    1.83   0
  -3  13  -5  163.51    2.37   0
  -2  18   4   19.75    1.92   0
  -1  15  -3  135.79    2.55   0
   0  18   6   -0.79    2.00   0
   1  13  -3    3.84    1.37   0
   1  15   0   45.52    1.90   0
   2  12  -2  162.92    2.09   0
   2  16   6   69.01    2.01   0
  -4  16   1    7.28    1.62   0
  -2  12  -6    9.27    1.30   0
  -2  14  -4   17.00    1.81   0
  -1  13  -5   48.33    1.80   0
   0  12  -5   -0.05    1.24   0
   0  14  -3   78.72    2.06   0
   0  18   7   50.37    2.12   0
   0  18   8    2.89    2.09   0
   2  14   1  179.67    2.45   0
   2  16   7   21.99    2.03   0
  -4  16   2   79.05    2.30   0
  -3  11  -6    5.15    1.14   0
  -2  16   0  200.57    2.75   0
  -1  15  -2   15.26    1.96   0
   0  18   9   35.52    1.92   0
   1  13  -2   18.06    1.43   0
   1  15   1    2.87    1.60   0
   2  12  -1   13.71    1.27   0
   2  14   2   19.01    1.60   0
  -3  13  -4   33.34    1.74   0
  -3  17   4   37.74    2.62   0
  -2  14  -3   -1.35    1.55   0
  -1  13  -4    4.70    1.44   0
   0  14  -2   -0.63    1.65   0
   0  18  10    1.53    1.89   0
   1  17   8    0.49    1.81   0
  -4  14  -1   76.49    1.93   0
  -4  16   3   78.90    2.03   0
  -2  12  -5   53.58    1.61   0
  -2  16   1   22.97    1.88   0
  -1  15  -1    4.55    1.89   0
  -1  17   4  114.78    2.40   0
   0  12  -4  135.62    1.93   0
   0  18  11  162.93    2.61   0
   0  18  12   89.18    2.10   0
   1  15   2   18.46    1.67   0
   1  17   9    4.28    2.00   0
   2  12   0  328.01    2.62   0
   2  14   3   -1.96    1.53   0
  -3  13  -3    6.92    1.61   0
  -3  17   5  242.31    3.00   0
  -2  14  -2   16.59    1.70   0
  -2  18   9   54.46    2.08   0
  -1  15   0   47.70    2.11   0
  -1  17   5  116.16    2.48   0
   0  14  -1   65.47    2.00   0
   1  13  -1    0.35    1.29   0
   1  15   3  129.79    2.31   0
   1  17  11    7.72    1.80   0
   2  14   4   15.80    1.62   0
  -4  14   0   50.69    2.15   0
  -4  16   4   18.22    1.81   0
  -3  17   6    2.15    2.00   0
  -2  12  -4   91.46    1.77   0
  -2  18  10   15.22    1.68   0
  -1  13  -3   42.64    1.70   0
   0  12  -3  198.94    2.13   0
   1  17  12   76.77    2.20   0
   1  17  13  148.14    2.44   0
   2  12   1  117.28    1.91   0
  -4  16   5   19.24    1.96   0
  -2  14  -1  180.27    2.50   0
  -2  16   3   32.64    1.95   0
  -1  15   1   45.39    2.10   0
  -1  17   7    1.08    1.68   0
   0  14   0   10.81    1.71   0
   1  13   0    2.30    1.25   0
   1  15   4  100.03    2.13   0
   1  17  14   42.74    2.06   0
   2  14   5   16.84    1.66   0
  -3  13  -2   13.05    1.62   0
  -3  17   8    6.87    1.98   0
  -1  13  -2   52.50    1.75   0
  -1  17   8    3.09    1.67   0
   1  13   1    1.95    1.36   0
   1  15   5   29.30    1.63   0
   2  12   2    1.71    1.26   0
   2  14   6   96.47    2.11   0
  -4  14   1  116.19    2.28   0
  -4  16   6   44.18    2.14   0
  -3  17   9   42.58    2.17   0
  -2  12  -3  234.34    2.33   0
  -2  14   0   39.34    1.84   0
  -2  16   4   76.41    2.11   0
  -1  15   2   27.66    2.02   0
  -1  17   9    4.11    1.72   0
   0  12  -2  128.71    1.70   0
   0  14   1   64.75    2.01   0
   1  15   6   82.29    2.11   0
   2  14   7   23.83    2.04   0
  -4  16   7  114.62    2.50   0
  -3  13  -1  103.99    2.15   0
  -3  17  10   -0.95    1.96   0
  -2  16   5   30.00    1.88   0
  -1  13  -1    3.11    1.57   0
  -1  15   3   83.15    2.33   0
  -1  17  10   26.69    1.88   0
   1  13   2   57.47    1.66   0
   2  12   3  231.27    2.27   0
  -4  14   2   28.79    1.86   0
  -4  16   8    1.28    1.99   0
  -3  17  11    2.78    1.93   0
  -2  12  -2    3.59    1.17   0
  -2  14   1   22.85    1.78   0
  -2  16   6   88.73    2.25   0
   0  12  -1   20.88    1.31   0
   0  14   2    3.92    1.29   0
   0  16   8   99.08    2.21   0
   1  15   7   49.47    1.97   0
   2  14   8    1.19    1.62   0
  -4  14   3    1.14    2.12   0
  -4  16   9    4.78    1.92   0
  -3  13   0   80.66    1.95   0
  -1  13   0    1.03    1.43   0
  -1  15   4   45.02    2.12   0
   0  14   3   77.77    2.09   0
   0  16   9    3.33    1.81   0
   1  13   3   43.91    1.61   0
   1  15   8    1.13    1.70   0
   2  12   4   82.68    1.74   0
  -4  16  10   36.10    2.05   0
  -3  17  13   38.52    2.03   0
  -3  17  14   -1.54    1.87   0
  -2  14   2    4.84    1.67   0
  -2  16   7  157.79    2.59   0
  -1  17  14    4.46    2.04   0
  -1  17  15  421.79    3.49   0
  -1  17  16   11.52    1.90   0
   0  12   0  470.91    3.01   0
   0  16  10   60.83    2.01   0
  -5  15   9   74.36    2.23   0
  -4  14   4   15.73    1.93   0
  -4  16  11   40.61    2.01   0
  -3  13   1    0.44    1.35   0
  -2  12  -1  119.37    1.80   0
  -2  16   8   36.79    1.99   0
  -1  13   1    1.14    1.39   0
  -1  15   5    3.23    1.85   0
   0  14   4   18.99    1.80   0
   0  16  11    2.92    1.84   0
   0  16  12   18.60    2.35   0
   1  13   4    3.10    1.33   0
   2  12   5   52.63    1.52   0
  -5  15  10   34.92    1.87   0
  -4  16  12    4.67    1.81   0
  -2  14   3    0.09    1.75   0
  -2  16   9   39.05    2.03   0
  -1  15   6   31.03    2.03   0
   0  12   1   19.56    1.32   0
   0  14   5   10.38    1.69   0
   0  16  13   74.72    2.25   0
   2  12   6    8.46    1.42   0
  -4  12   1    1.97    1.33   0
  -4  14   5    0.57    1.88   0
  -4  16  13   17.21    1.89   0
  -4  16  14   -1.56    2.19   0
  -3  13   2   28.07    1.61   0
  -2  12   0  341.29    2.66   0
  -2  16  10   42.68    2.05   0
  -1  13   2   20.99    1.48   0
  -1  15   7   87.48    2.39   0
   0  16  14    4.96    1.87   0
   0  16  15    7.02    2.06   0
   0  16  16    1.19    2.34   0
   1  13   5   44.33    1.61   0
   1  15  13    2.35    1.78   0
  -5  15  12   11.50    1.69   0
  -4  16  15   57.12    2.12   0
  -2  14   4   13.14    1.88   0
   0  12   2  131.52    1.85   0
   0  14   6  266.23    2.89   0
   0  16  18   50.30    2.12   0
   0  16  19   33.40    2.03   0
   1  13   6  102.71    1.90   0
   1  15  14    0.17    1.86   0
   1  15  15    4.57    1.83   0
   2  12   7   86.77    1.66   0
  -5  15  13  173.27    2.53   0
  -4  12   2  102.72    2.06   0
  -3  13   3   16.68    1.63   0
  -3  15   8   51.09    2.00   0
  -2  12   1   11.72    1.25   0
  -2  14   5   14.17    1.83   0
  -2  16  12   10.01    1.84   0
  -2  16  13   66.90    2.11   0
  -1  13   3    5.34    1.42   0
  -1  15   8    4.98    1.94   0
   0  14   7   53.72    1.94   0
   1  15  16    6.63    1.69   0
   1  15  17   11.42    1.68   0
  -3  15   9   99.88    2.26   0
  -2  16  14   -0.67    1.65   0
  -2  16  15   47.83    2.09   0
   1  13   7   53.97    1.62   0
  -4  12   3   12.65    1.49   0
  -3  13   4  107.55    2.16   0
  -3  15  10   -1.32    1.70   0
  -2  14   6   19.96    2.04   0
  -2  16  17   21.98    1.98   0
  -2  16  18   10.67    1.84   0
  -2  16  19   10.04    1.79   0
  -1  13   4   10.51    1.46   0
   0  14   8  161.06    2.46   0
   1  13   8  212.38    2.50   0
  -2  12   2  167.14    2.07   0
  -2  14   7   50.17    2.10   0
   0  12   4  138.17    1.90   0
   0  14   9  250.82    2.82   0
   1  13   9  138.15    2.22   0
  -4  12   4    8.38    1.51   0
  -3  13   5    5.83    1.58   0
  -3  15  12   12.54    1.91   0
  -1  13   5   32.29    1.63   0
  -1  15  13   45.90    2.06   0
   0  14  10   41.53    1.95   0
  -4  14  10   48.06    2.04   0
  -3  15  13  143.83    2.62   0
  -2  12   3   -1.32    1.21   0
  -2  14   8  113.17    2.46   0
  -1  13   6   44.35    1.74   0
  -1  15  14   12.90    1.98   0
   0  12   5    0.34    1.12   0
   0  14  11  341.34    3.20   0
   1  13  10  197.29    2.55   0
  -5  13  10   31.15    1.67   0
  -4  12   5    0.24    1.57   0
  -4  14  11  332.07    3.27   0
  -3  13   6    3.61    1.62   0
  -3  15  14   80.06    2.28   0
  -3  15  15    3.75    1.79   0
  -2  14   9  182.68    2.78   0
  -1  15  15   34.36    2.02   0
  -1  15  16    7.11    1.85   0
  -1  15  17   23.51    1.88   0
  -1  15  22   13.93    2.29   0
  -1  15  23   94.43    2.04   0
   0  14  12    2.31    1.63   0
   1  13  11   28.91    1.73   0
  -5  13  11   10.96    1.89   0
  -4  14  12   -1.78    1.84   0
  -3  13   7  157.06    2.42   0
  -3  15  16    6.36    1.79   0
  -3  15  17   22.91    2.01   0
  -3  15  18    1.80    1.77   0
  -3  15  19   -1.51    2.10   0
  -3  15  20   26.37    2.30   0
  -3  15  21   48.05    1.98   0
  -2  12   4    4.90    1.26   0
  -2  14  10   -0.89    1.92   0
  -1  13   7  248.77    2.69   0
  -1  15  18   40.84    2.14   0
  -1  15  20   -1.20    2.05   0
  -1  15  21  164.28    2.66   0
   0  12   6    1.29    1.28   0
   0  14  13    8.19    1.71   0
   1  13  12  149.33    2.36   0
  -4  12   6    2.14    1.65   0
  -2  14  11  494.76    3.95   0
  -1  13   8    0.52    1.64   0
   0  14  14    1.40    1.59   0
   1  13  13   77.99    2.11   0
  -5  13  12  104.89    2.29   0
  -4  14  15   50.89    2.11   0
  -3  13   8    6.27    1.66   0
  -2  12   5    6.68    1.34   0
  -2  14  12   12.99    2.06   0
   0  12   7  154.55    2.02   0
   0  14  17   64.87    2.17   0
   0  14  18   11.16    2.21   0
   0  14  22    5.11    2.27   0
   0  14  23  185.10    2.64   0
   0  14  24    1.16    1.56   0
   1  13  14   96.99    2.19   0
   1  13  15   31.92    1.97   0
  -5  13  13  199.59    2.75   0
  -5  13  14    1.86    2.17   0
  -4  14  17  104.01    2.53   0
  -3  11   4  209.15    2.18   0
  -3  13   9  264.78    2.91   0
  -2  12   6   32.79    1.57   0
  -1  13   9  203.47    2.63   0
   0  12   8    8.95    1.24   0
   0  14  19  158.34    2.69   0
   0  14  20    9.69    1.89   0
   0  14  21   86.81    2.35   0
   1  13  16   23.38    1.90   0
   1  13  17   18.19    1.84   0
  -4  12   8   32.92    1.80   0
  -4  14  18    1.24    2.07   0
  -4  14  19  101.76    2.68   0
  -4  14  20   -1.77    2.00   0
  -4  14  21   52.47    2.08   0
  -4  14  22   30.14    1.97   0
  -3  13  10   32.79    1.92   0
  -1  13  10   76.11    2.11   0
  -5  13  17    1.44    2.06   0
  -3  11   5  129.08    1.88   0
  -2  12   7    2.81    1.42   0
  -2  14  16    1.85    1.80   0
  -2  14  24   27.97    2.23   0
  -2  14  25  146.93    2.49   0
  -1  13  11   37.37    2.06   0
   0  12   9   53.75    1.56   0
  -5  13  19   15.21    2.02   0
  -5  13  20    3.69    1.89   0
  -5  13  21  166.89    2.59   0
  -5  13  22   98.95    2.40   0
  -3  13  11   84.52    2.27   0
  -2  14  17   46.16    2.04   0
  -2  14  18   13.29    1.96   0
  -2  14  19  118.71    2.49   0
  -2  14  20   11.88    1.85   0
  -2  14  21   88.87    2.33   0
  -2  14  23   98.72    2.44   0
  -1  13  12   56.88    2.05   0
   0  12  10  490.71    3.32   0
  -4  12  10  146.62    2.39   0
  -3  11   6  149.96    2.00   0
  -3  13  12    3.65    1.83   0
  -2  12   8   16.73    1.55   0
  -1  13  13  283.55    3.17   0
   0  12  11   70.16    1.84   0
  -5  11  10   45.91    2.10   0
  -4  12  11   22.90    1.84   0
  -3  13  13  187.41    2.80   0
  -3  13  14    9.36    2.07   0
  -2  12   9   89.41    2.01   0
  -1  13  14  228.62    2.95   0
  -1  13  15   88.92    2.34   0
  -1  13  27   90.94    2.11   0
   0  12  12   20.05    1.55   0
  -3  11   7    4.04    1.26   0
  -2  12  10  106.74    2.18   0
  -1  13  16   79.23    2.30   0
  -1  13  26    6.91    1.81   0
   0  12  13    8.78    1.64   0
   1  11  12  256.60    2.54   0
  -5  11  11    0.56    1.71   0
  -4  10   6   17.56    1.35   0
  -4  12  12    2.14    1.50   0
  -3  13  17   18.26    1.94   0
  -3  13  25   14.35    1.91   0
  -3  13  26   20.15    1.81   0
  -1  13  17   -0.74    1.91   0
  -1  13  20  153.11    2.64   0
  -1  13  21  204.91    2.82   0
  -1  13  22  110.94    2.55   0
  -1  13  23   86.00    2.40   0
  -1  13  24    2.65    2.16   0
   0  12  14  211.62    2.65   0
   1  11  13    8.76    1.46   0
  -3  11   8  126.97    1.97   0
  -3  13  18   51.75    2.12   0
  -3  13  19   33.51    2.12   0
  -3  13  20  165.31    2.88   0
  -3  13  21  171.46    2.79   0
  -3  13  22  261.14    3.14   0
  -3  13  23   85.14    2.36   0
  -3  13  24   12.79    1.91   0
  -2  12  11   88.60    2.07   0
   0  12  15    2.61    1.58   0
   0  12  26    9.53    2.15   0
   1  11  14  130.84    2.13   0
  -4  10   7   34.67    1.52   0
  -4  12  14   18.97    1.79   0
  -4  12  15    4.59    1.79   0
  -3  11   9   -1.72    1.34   0
  -2  12  12   22.45    1.79   0
   0  12  16   98.70    2.17   0
   0  12  17    3.75    1.52   0
   0  12  25   29.94    1.76   0
   1  11  15   43.39    1.85   0
  -4  10   8   -0.65    1.37   0
  -4  12  26   17.34    1.91   0
  -2  12  13   18.89    1.77   0
  -1  11  10   13.96    1.34   0
   0  12  18    8.24    1.76   0
   0  12  19   40.04    2.05   0
   0  12  20    5.42    1.86   0
   0  12  22   -1.54    1.87   0
   0  12  23  103.19    2.47   0
   0  12  24    2.82    1.74   0
   1  11  16   24.33    1.60   0
   1  11  17    1.41    1.60   0
  -4  12  18   56.24    2.13   0
  -4  12  19    8.94    1.85   0
  -4  12  20  350.55    3.50   0
  -4  12  21   -0.08    2.28   0
  -4  12  22   25.23    2.28   0
  -4  12  25   14.34    1.98   0
  -3  11  10   63.42    1.73   0
  -2  12  14   58.52    2.06   0
  -2  12  15  114.00    2.49   0
  -1  11  11   61.99    1.65   0
   1  11  18  129.20    2.38   0
   1  11  19   60.73    2.07   0
  -5  11  26   26.19    2.00   0
  -4  10   9   73.15    1.79   0
  -3  11  11   14.05    1.52   0
  -2  12  16   52.46    2.35   0
  -2  12  27   48.48    2.22   0
  -6  10  21  112.88    2.73   0
  -6  10  22  103.70    2.61   0
  -6  10  23    7.08    1.77   0
  -6  10  24   23.23    1.88   0
  -5  11  18  284.20    3.20   0
  -5  11  19   26.35    1.98   0
  -5  11  20   39.67    2.14   0
  -5  11  21    3.80    1.97   0
  -5  11  22  300.39    3.35   0
  -5  11  23   71.49    2.43   0
  -5  11  24  156.83    2.65   0
  -3  11  12    7.29    1.54   0
  -2  12  17   21.05    2.09   0
  -2  12  18  152.88    2.91   0
  -2  12  19   32.51    2.25   0
  -2  12  23  229.04    3.07   0
  -2  12  24   90.93    2.32   0
  -2  12  25   15.85    1.79   0
  -1  11  12  106.59    1.93   0
  -4  10  10    8.32    1.42   0
  -3  11  13   18.85    1.71   0
  -2  12  22   32.34    2.04   0
  -1  11  13   17.09    1.51   0
  -1  11  29    6.00    1.65   0
  -4  10  11   77.46    1.86   0
  -3  11  14   64.74    2.13   0
  -1  11  14    2.15    1.58   0
  -1  11  15    1.47    1.64   0
  -1  11  28   11.47    1.98   0
  -4  10  12   78.59    1.81   0
  -3  11  15   11.10    1.83   0
  -3  11  27   -0.01    1.67   0
  -3  11  28   29.72    1.92   0
  -1  11  16   11.05    1.69   0
  -1  11  27   19.86    1.94   0
  -4  10  13   60.18    1.84   0
  -3  11  16   20.48    1.99   0
  -3  11  17    9.36    1.98   0
  -3  11  26   -0.12    1.78   0
  -1  11  17   69.85    2.13   0
  -1  11  18    0.22    1.77   0
  -1  11  19   27.88    1.94   0
  -1  11  24   35.05    1.90   0
  -1  11  25   24.17    2.00   0
   0  10  14  148.21    2.00   0
  -5   9  12   76.99    1.88   0
  -4  10  14  224.28    2.70   0
  -4  10  29  121.31    2.42   0
  -3  11  18  133.64    2.69   0
  -3  11  19   30.84    2.16   0
  -3  11  20   27.09    2.23   0
  -3  11  22  326.37    3.48   0
  -3  11  23  111.64    2.54   0
  -3  11  24   39.28    2.17   0
  -3  11  25   74.76    2.28   0
  -2  10  31    0.88    1.70   0
  -1  11  20   76.81    2.24   0
  -1  11  21   18.74    1.93   0
  -1  11  22   22.06    2.04   0
   0  10  15   92.22    1.81   0
   0  10  27   21.45    1.87   0
   0  10  28    5.50    1.58   0
  -5   9  13   23.38    1.67   0
  -4  10  15    3.09    1.67   0
  -4  10  28   11.46    1.93   0
  -2  10  12   16.41    1.36   0
  -2  10  30  130.52    2.48   0
   0  10  16   29.31    1.51   0
   0  10  17   53.01    1.92   0
  -5   9  14  205.43    2.64   0
  -5   9  29    6.32    1.85   0
  -4  10  16   53.08    1.97   0
  -4  10  17   40.38    1.97   0
  -4  10  26   13.94    1.87   0
  -4  10  27  187.67    2.72   0
  -2  10  13   22.32    1.45   0
  -2  10  29  106.04    2.46   0
   0  10  18  374.63    3.12   0
   0  10  19   83.95    2.13   0
   0  10  23   11.01    1.84   0
   0  10  24    3.97    1.80   0
  -6   8  27   46.78    1.92   0
  -5   9  15   30.46    1.85   0
  -5   9  16  186.38    2.86   0
  -5   9  28    1.33    1.73   0
  -4  10  18    5.85    1.76   0
  -4  10  19  163.12    2.68   0
  -4  10  20  128.10    2.65   0
  -4  10  23   56.01    2.20   0
  -4  10  24   35.10    2.14   0
  -4  10  25    6.58    1.84   0
  -3   9  32   63.25    2.24   0
  -2  10  14    4.13    1.38   0
  -2  10  28    0.78    1.66   0
  -1   9  32   56.79    2.06   0
   0  10  20   28.09    1.83   0
   0  10  21   21.95    1.89   0
   0  10  22   21.15    1.92   0
   1   9  18    8.69    1.29   0
  -6   8  25   39.81    2.30   0
  -6   8  26   15.99    1.85   0
  -5   9  25   31.59    2.51   0
  -2  10  15  165.66    2.14   0
  -2  10  16   46.00    1.84   0
  -2  10  27  105.46    2.38   0
  -1   9  31   18.69    1.88   0
   1   9  19   16.90    1.54   0
  -6   8  21   -0.30    1.72   0
  -6   8  22   18.35    1.92   0
  -6   8  24    3.89    1.91   0
  -5   9  18   50.72    2.06   0
  -5   9  19   11.34    1.89   0
  -5   9  22   12.53    1.93   0
  -5   9  23   24.19    2.01   0
  -5   9  24    3.50    1.92   0
  -3   9  31   13.48    1.81   0
  -2  10  17   61.71    1.97   0
  -2  10  18  125.20    2.48   0
  -2  10  25   35.38    2.13   0
  -2  10  26   34.06    1.97   0
  -1   9  30    3.79    1.78   0
  -3   9  13  218.95    2.32   0
  -2  10  19   10.85    1.84   0
  -2  10  20    5.90    1.90   0
  -2  10  21   18.89    2.04   0
  -2  10  22   23.21    2.09   0
  -2  10  23   18.53    2.04   0
  -6   2 -23   64.00    2.45   0
  -6   4 -27   15.33    1.93   0
  -5   3 -30  327.64    3.58   0
  -5   5 -32    9.52    1.94   0
  -4   0 -28    5.90    2.12   0
  -4   4 -34  104.44    2.46   0
  -3  -1 -28    3.56    1.99   0
  -3   3 -35  179.70    2.81   0
  -2  -2 -27   29.62    1.53   0
  -2   0 -32   19.66    1.85   0
  -6   2 -22    4.71    1.86   0
  -4   0 -27    1.98    2.07   0
  -4   2 -31    5.23    2.27   0
  -3  -1 -27    6.39    1.87   0
  -2  -2 -26   82.75    2.09   0
  -1  -1 -30  173.21    2.70   0
  -1   3 -36    1.68    2.05   0
   0  -2 -27   32.87    1.69   0
  -5   1 -25   41.37    2.09   0
  -5   3 -29   59.85    2.29   0
  -5   5 -31   53.58    2.48   0
  -4   0 -26    4.35    2.05   0
  -4   4 -33   43.30    2.21   0
  -3   3 -34   28.17    2.00   0
  -2  -2 -25   55.58    1.89   0
  -2   2 -34    3.81    1.94   0
  -2   4 -36   70.66    2.28   0
  -1  -1 -29    3.80    1.77   0
   0  -2 -26  129.81    2.17   0
  -5   1 -24  124.43    2.54   0
  -4   2 -30    7.43    1.93   0
  -3  -1 -26   66.95    2.20   0
  -2  -2 -24   13.88    1.47   0
  -2   0 -30  127.56    2.53   0
  -1   1 -33    1.09    1.78   0
   0  -2 -25  307.97    2.73   0
   0   0 -31   -0.85    1.68   0
  -6   4 -24   47.66    2.13   0
  -5   1 -23   70.95    2.19   0
  -5   3 -28  177.83    2.96   0
  -4   0 -25   -1.40    1.86   0
  -4   4 -32   86.22    2.27   0
  -3  -1 -25    0.38    1.69   0
  -3   3 -33   14.59    1.81   0
  -3   5 -35  137.01    2.52   0
  -2  -2 -23  125.16    2.03   0
  -1  -1 -28    2.60    1.59   0
  -1   3 -35   57.33    2.20   0
  -5   1 -22  255.29    2.99   0
  -5   3 -27   28.54    2.12   0
  -4   0 -24   51.86    2.16   0
  -4   6 -33   12.66    2.18   0
  -2   0 -29    2.79    1.71   0
  -2   4 -35   65.65    2.31   0
  -1  -1 -27   65.47    2.01   0
   0   0 -30  122.78    2.45   0
  -5   1 -21   32.45    1.93   0
  -5   1 -20  107.79    2.25   0
  -5   5 -29   14.41    2.06   0
  -4   0 -23    0.93    1.63   0
  -4   4 -31    2.98    1.80   0
  -3  -1 -23   10.07    1.53   0
  -3   1 -29   79.65    2.48   0
  -3   3 -32  176.67    2.89   0
  -3   5 -34   -0.89    1.72   0
  -1   5 -36   54.47    2.02   0
   0   2 -33  106.07    2.20   0
  -5   1 -19   46.30    1.93   0
  -5   7 -30  139.65    2.61   0
  -4   0 -22    3.91    1.53   0
  -3  -1 -22  258.15    2.69   0
  -2   0 -28   17.32    1.85   0
  -1  -1 -26   47.16    1.74   0
  -1   1 -31    3.36    1.78   0
  -1   3 -34   18.77    1.88   0
   0   0 -29    0.90    1.71   0
   0   4 -35   63.00    2.13   0
  -5   1 -18   -0.26    1.51   0
  -5   3 -25   70.58    2.25   0
  -5   5 -28   22.30    2.01   0
  -4   0 -21    0.64    1.33   0
  -4   0 -20   69.01    1.73   0
  -4   2 -27   57.31    2.32   0
  -4   4 -30   16.36    2.00   0
  -4   6 -32   21.07    2.10   0
  -3   3 -31  173.49    2.76   0
  -3   5 -33    3.58    2.13   0
  -2   0 -27    1.05    1.66   0
  -2   6 -35   54.89    2.27   0
  -1  -1 -25   51.04    1.64   0
  -5   3 -24   95.71    2.29   0
  -5   7 -29   51.25    2.17   0
  -4   2 -26   88.87    2.42   0
  -1   1 -30  172.32    2.59   0
  -1   3 -33   62.64    2.21   0
  -1   5 -35    3.75    1.77   0
   0   0 -28   52.38    1.88   0
  -5   3 -23  169.09    2.67   0
  -5   5 -27    7.01    1.87   0
  -4   4 -29    6.20    2.06   0
  -4   6 -31   10.28    2.05   0
  -3   1 -26   69.62    2.17   0
  -2   0 -26    8.29    1.60   0
  -2   2 -30    5.25    1.89   0
  -1  -1 -24   19.11    1.28   0
  -5   3 -22   11.06    2.15   0
  -5   5 -26   36.00    2.06   0
  -5   7 -28   99.72    2.56   0
  -4   2 -25  145.23    2.60   0
  -3   5 -32   68.07    2.21   0
  -3   7 -33   -0.47    1.81   0
  -2   0 -25   -2.32    1.50   0
  -2   6 -34    3.35    1.91   0
  -1   1 -29    4.14    1.55   0
  -1   3 -32   50.56    2.09   0
   0   0 -27    1.89    1.38   0
   0   2 -31   32.41    1.91   0
   0   6 -35   35.07    1.76   0
  -5   9 -28  150.44    2.52   0
  -4   2 -24   42.67    2.08   0
  -4   6 -30   23.46    1.88   0
  -4   8 -31    3.23    1.75   0
  -3   1 -25    1.82    1.65   0
  -3   3 -29   21.94    2.41   0
  -2   2 -29   17.97    1.97   0
  -2   4 -32   67.74    2.25   0
  -1   7 -35   36.93    1.83   0
   0   0 -26    7.94    1.40   0
   0   4 -33   13.60    1.54   0
  -5   3 -21   54.53    2.08   0
  -5   7 -27   61.59    2.28   0
  -4   2 -23   44.49    1.88   0
  -3   1 -24  107.54    2.14   0
  -2   0 -24   28.05    1.50   0
  -1   1 -28    2.19    1.57   0
   0   2 -30   94.46    2.27   0
  -5   3 -20   54.85    1.98   0
  -5   3 -19   36.82    2.01   0
  -5   5 -24   -1.69    1.77   0
  -5   9 -27    4.57    1.72   0
  -4   6 -29    2.92    1.82   0
  -4   8 -30   80.79    2.33   0
  -3   7 -32    2.37    1.71   0
  -2   0 -23    1.03    1.22   0
  -2   2 -28    7.31    1.88   0
  -2   6 -33    6.03    1.66   0
  -1   5 -33    6.59    1.89   0
   0   0 -25   -0.23    1.28   0
   0   6 -34    5.65    1.79   0
  -5   3 -18   42.81    1.69   0
  -5   5 -23  144.42    2.85   0
  -4   2 -22   10.99    1.49   0
  -4   4 -26  214.31    2.95   0
  -3   1 -23    9.48    1.56   0
  -3   5 -30   32.90    2.08   0
  -3   9 -32    2.22    1.73   0
  -1   7 -34   13.10    1.80   0
   0   2 -29   14.95    1.66   0
   0   4 -32   29.24    1.92   0
  -5   9 -26    1.77    1.79   0
  -4   2 -21   18.14    1.48   0
  -4   6 -28   36.94    1.99   0
  -4   8 -29    9.43    2.11   0
  -3   1 -22  249.97    2.64   0
  -3   3 -27    0.75    1.94   0
  -3   7 -31   10.45    1.91   0
  -2   2 -27   28.40    1.95   0
  -2   8 -33   25.88    1.88   0
  -1   1 -26   56.51    1.77   0
  -1   3 -30   16.39    1.76   0
  -5   5 -22   54.14    2.14   0
  -4   2 -20  164.54    2.19   0
  -4   4 -25   37.87    1.96   0
  -4  10 -29   10.27    1.77   0
  -3   3 -26   71.05    2.21   0
   0   2 -28    1.84    1.57   0
   0   6 -33   90.24    2.38   0
   0   8 -34    3.24    1.67   0
  -5   5 -21    4.72    1.72   0
  -5   9 -25   -0.68    1.80   0
  -4   4 -24   10.02    1.77   0
  -4   6 -27   18.70    1.87   0
  -4   8 -28  151.50    2.76   0
  -3   7 -30  169.39    2.75   0
  -3   9 -31   81.07    2.27   0
  -2   2 -26   87.20    2.17   0
  -2   4 -29    0.74    1.89   0
  -2   6 -31   11.89    1.83   0
  -1   1 -25   52.90    1.68   0
  -1   3 -29    7.81    1.66   0
  -5   9 -24    6.41    2.02   0
  -4  10 -28  131.79    2.59   0
  -3   3 -25   12.58    1.81   0
  -2   2 -25   54.01    1.91   0
  -1   5 -31    9.93    1.75   0
  -1   9 -33  148.86    2.53   0
   0   2 -27   31.90    2.00   0
   0   6 -32   -0.54    2.05   0
  -4   4 -23    6.23    1.76   0
  -4   8 -27    6.94    1.97   0
  -3   7 -29  101.91    2.50   0
  -3   9 -30   90.68    2.43   0
  -2   4 -28  101.62    2.56   0
  -2   6 -30    3.21    1.72   0
  -1   1 -24   17.91    1.26   0
  -1   3 -28   59.94    2.05   0
   0   4 -30   11.68    1.76   0
   0   8 -33    3.05    1.68   0
  -5   5 -19  287.81    3.06   0
  -5   7 -22   16.98    1.98   0
  -5   9 -23    9.36    1.73   0
  -4   4 -22  210.68    2.72   0
  -4   6 -25   61.49    2.14   0
  -4  10 -27   18.44    2.00   0
  -3   3 -24   12.60    1.34   0
  -2   2 -24   13.05    1.50   0
  -2   8 -31   19.14    1.89   0
  -5   7 -21   75.07    2.26   0
  -4   8 -26  200.01    2.94   0
  -3   3 -23   84.98    2.06   0
  -3   7 -28   75.92    2.32   0
  -3   9 -29   16.75    1.85   0
  -3  11 -29   16.04    1.84   0
  -2   4 -27   -1.25    1.80   0
  -2  10 -31   -1.81    1.80   0
  -1   3 -27   56.65    1.99   0
  -1   7 -31   22.74    1.85   0
  -1   9 -32   32.32    2.09   0
   0   2 -26  130.27    2.16   0
   0   4 -29   -0.70    1.66   0
   0   8 -32   23.36    2.38   0
  -4   4 -21   61.06    1.92   0
  -4   6 -24   -0.70    1.73   0
  -4  10 -26   40.06    2.36   0
  -3   5 -26    2.12    1.94   0
  -2   2 -23  126.46    2.05   0
  -2   8 -30   18.98    1.88   0
  -1   5 -29  139.41    2.58   0
   1   9 -32   55.21    2.26   0
  -5   7 -20   51.32    2.01   0
  -4   4 -20   32.39    1.58   0
  -4  12 -25   35.51    2.27   0
  -3   3 -22    4.68    1.40   0
  -3   5 -25   73.01    2.26   0
  -3   9 -28   54.69    2.28   0
  -2   4 -26  195.49    2.84   0
  -2  10 -30   50.86    2.15   0
  -1   3 -26    7.65    1.54   0
  -1   9 -31   23.65    2.04   0
   0   2 -25  308.49    2.78   0
   0   4 -28  106.46    2.30   0
   0  10 -32    1.59    1.70   0
   1   7 -31  117.16    2.37   0
  -4   4 -19   53.69    1.63   0
  -4   6 -23   38.07    2.02   0
  -4  10 -25   17.13    2.00   0
  -3   3 -21  350.84    2.99   0
  -3  11 -28    2.88    1.86   0
  -2   6 -28   34.09    2.22   0
  -1   7 -30   40.84    2.00   0
  -1  11 -31   30.99    2.05   0
   0   8 -31   28.29    2.05   0
   1   5 -29   85.43    2.05   0
  -4   6 -22   36.21    1.94   0
  -4  12 -24  296.34    3.39   0
  -3   5 -24   17.41    1.88   0
  -2   4 -25    9.77    1.77   0
  -2   8 -29    4.11    1.90   0
  -1   3 -25   33.24    1.62   0
  -1   5 -28    0.04    1.74   0
   0  10 -31   56.79    2.45   0
   1   9 -31   21.96    2.15   0
  -4  10 -24   67.77    2.31   0
  -3   9 -27   48.21    2.21   0
  -3  11 -27   23.02    2.25   0
  -2   6 -27  235.64    3.22   0
  -2  10 -29  106.07    2.41   0
  -1   9 -30    4.98    1.96   0
  -1  11 -30   23.60    2.03   0
   0   4 -27  133.98    2.35   0
   0   6 -29  186.76    2.80   0
   1   7 -30   47.48    1.81   0
  -4   6 -21   50.38    1.87   0
  -4   8 -23   20.21    2.00   0
  -4  12 -23    4.21    2.18   0
  -3   5 -23   52.06    2.05   0
  -3   7 -25   12.12    2.06   0
  -2   4 -24  140.41    2.33   0
  -2   8 -28   48.62    2.19   0
  -1   3 -24    5.17    1.25   0
  -1   5 -27   16.96    1.86   0
   0   8 -30   11.86    1.90   0
   1   5 -28   -0.38    1.69   0
  -4   6 -20   -0.24    1.61   0
  -4   8 -22   10.97    2.22   0
  -4  10 -23   30.96    2.06   0
  -3   9 -26   27.89    2.00   0
  -3  11 -26   22.26    2.18   0
  -2  10 -28   22.27    1.95   0
  -1   9 -29   46.11    2.14   0
   0   4 -26  285.95    2.92   0
   0  10 -30  109.08    2.58   0
  -4  12 -22   -3.22    2.24   0
  -3   5 -22    3.27    1.56   0
  -3   7 -24   18.61    2.01   0
  -3  13 -25    2.25    1.86   0
  -2   4 -23  337.13    3.04   0
  -1   5 -26    4.47    1.81   0
  -1  11 -29    2.65    1.82   0
   0   6 -28    9.67    1.58   0
   1   5 -27  201.33    2.83   0
   1  11 -30   46.23    2.03   0
  -4   6 -19    3.68    1.56   0
  -4   8 -21    5.05    1.88   0
  -4  10 -22    7.99    2.17   0
  -3  11 -25    1.47    1.87   0
  -2   6 -25    5.84    1.86   0
  -2  12 -27   20.59    2.04   0
   0   4 -25  198.28    2.47   0
  -4   6 -18    1.50    1.81   0
  -4  12 -21    2.13    2.17   0
  -3   5 -21   10.72    1.48   0
  -3   7 -23   44.28    2.10   0
  -3  13 -24   74.35    2.36   0
  -2   4 -22  112.51    2.05   0
  -2   8 -26   93.97    2.67   0
  -1   5 -25  506.50    3.83   0
  -1   7 -27   76.47    2.41   0
  -1   9 -28    5.10    1.77   0
  -1  11 -28    4.40    2.11   0
   0   6 -27  341.01    3.39   0
   0  10 -29   20.71    2.28   0
   0  12 -29   61.22    2.08   0
   1   7 -28  171.61    2.80   0
   1   9 -29   12.49    1.88   0
  -4   8 -20    7.23    2.03   0
  -3   5 -20  276.10    2.73   0
  -3  11 -24    1.36    1.96   0
  -2   6 -24   90.33    2.33   0
  -2  12 -26   58.42    2.13   0
   1   5 -26    1.95    1.58   0
   1  11 -29    3.69    1.71   0
  -4   6 -17   31.59    1.76   0
  -4  12 -20  253.52    3.04   0
  -3   7 -22  164.67    2.76   0
  -3  13 -23  157.49    2.79   0
  -2   8 -25   12.84    2.11   0
  -2  10 -26   14.63    1.95   0
  -1   5 -24    1.20    1.60   0
  -1   7 -26   30.37    2.23   0
  -1  13 -27   82.87    2.29   0
   0   4 -24   56.44    1.73   0
   0   6 -26  169.02    2.68   0
   0  12 -28   55.57    2.30   0
  -4   8 -19    0.91    1.82   0
  -4  10 -20   91.48    2.58   0
  -3   9 -23   12.07    1.93   0
  -3  11 -23    0.20    2.26   0
  -2   6 -23   42.49    1.93   0
  -1  11 -27   41.99    2.16   0
   0  10 -28    8.96    1.76   0
   1   5 -25  512.59    3.64   0
   1   7 -27  139.01    2.55   0
   2  12 -28   26.64    1.76   0
  -4   8 -18  332.45    3.31   0
  -4  12 -19  112.85    2.38   0
  -3   7 -21   56.83    2.03   0
  -3  13 -22  206.77    3.07   0
  -2  10 -25   14.16    2.14   0
  -1   5 -23   20.67    1.53   0
  -1  13 -26   15.43    1.94   0
   0   4 -23  259.67    2.71   0
   0   8 -27   -1.42    1.81   0
   1  11 -28   11.88    2.09   0
  -3   9 -22    1.34    1.81   0
  -2   6 -22    0.32    1.55   0
  -2   8 -24    3.79    2.05   0
  -1   7 -25  325.48    3.45   0
  -1  11 -26    3.05    1.90   0
   0   6 -25   58.40    2.03   0
   0  12 -27   -0.26    1.97   0
   1  13 -27   98.98    2.38   0
  -4   8 -17    2.12    1.68   0
  -4  10 -18   19.19    2.02   0
  -3   7 -20  276.84    3.03   0
  -3  11 -22  119.07    2.57   0
  -3  13 -21  244.06    3.27   0
  -2  12 -24   61.63    2.28   0
  -2  14 -23  236.16    3.09   0
   0   8 -26   85.44    2.30   0
   1   5 -24   74.97    1.95   0
   1   7 -26   21.26    1.79   0
   1   9 -27   10.23    1.88   0
   1  11 -27   16.22    2.38   0
   2  10 -27  111.08    2.32   0
   2  12 -27   47.39    1.96   0
  -3   9 -21    9.50    1.84   0
  -3  15 -19   12.75    1.87   0
  -2   6 -21    1.54    1.53   0
  -2   8 -23   21.99    2.03   0
  -1   5 -22  148.94    2.17   0
  -1   7 -24  289.86    3.28   0
  -1   9 -25   76.87    2.50   0
  -1  13 -25   23.03    2.04   0
   0   6 -24   45.77    1.86   0
  -4   8 -16  327.62    3.08   0
  -4  10 -17  337.12    3.54   0
  -3   7 -19  113.48    2.23   0
  -2  10 -23    2.51    2.16   0
  -2  12 -23  126.17    2.67   0
  -2  14 -22   50.32    2.81   0
  -1  11 -25   14.38    1.94   0
   0  10 -26    0.94    1.85   0
   0  12 -26   13.16    1.86   0
   0  14 -25  289.49    3.26   0
   1   5 -23   21.07    1.58   0
   1   7 -25  146.89    2.51   0
   1  13 -26    8.09    1.91   0
  -4   8 -15   41.38    1.69   0
  -3   9 -20   30.32    2.01   0
  -3  15 -18   11.04    1.84   0
  -2   6 -20   10.39    1.43   0
  -2   8 -22   31.58    2.03   0
  -1   7 -23    2.49    1.77   0
  -1   9 -24    6.17    2.05   0
  -1  13 -24   54.11    2.15   0
  -1  15 -23  133.10    2.55   0
   0   8 -25   42.00    2.04   0
   1  11 -26   18.32    2.06   0
   2  10 -26   36.01    1.95   0
   2  12 -26    4.23    1.86   0
  -4  10 -16    8.46    1.85   0
  -3   7 -18   41.11    1.62   0
  -3  13 -19    4.67    2.42   0
  -1  11 -24    0.99    1.89   0
   0   6 -23  199.72    2.54   0
   0  12 -25   32.19    2.02   0
   2   8 -25    1.27    1.60   0
  -3  15 -17   -0.42    1.80   0
  -2   8 -21    3.94    1.77   0
  -2  10 -22   11.36    2.05   0
  -2  12 -22   85.72    2.42   0
  -2  14 -21   52.69    2.53   0
  -2  16 -19   24.79    1.90   0
  -1   7 -22  168.07    2.58   0
  -1  15 -22    8.42    2.03   0
   0   8 -24   28.89    1.97   0
   0  14 -24    0.87    1.93   0
   1   7 -24  112.78    2.36   0
   1   9 -25    6.19    1.89   0
   1  13 -25   47.86    2.27   0
  -3   1  32  474.39    3.95   0
  -2  -8  35    8.79    1.75   0
  -2   2  29   24.04    1.94   0
  -1  -9  33   89.87    2.28   0
  -1  -7  34    7.64    1.98   0
  -1   1  29   13.46    1.63   0
   0  -6  32   -1.85    2.10   0
   0  -4  32   31.66    2.14   0
   1  -5  29  135.65    2.48   0
   1  -3  28   59.62    2.06   0
  -4  -4  36   62.10    2.16   0
  -4   0  33    0.91    2.21   0
  -3  -7  36   23.88    1.73   0
  -3  -5  36    3.41    1.91   0
  -2  -4  35   20.88    1.89   0
  -1  -3  33   30.34    2.44   0
   0  -2  30   97.80    2.53   0
  -5  -3  35   26.20    2.08   0
  -3  -3  35    5.64    2.25   0
  -3   1  31   23.27    2.15   0
  -2 -10  33   -0.08    1.76   0
  -2  -6  35  274.45    3.10   0
  -2   2  28   40.53    2.08   0
  -1  -1  31    5.55    2.03   0
  -1   1  28   90.05    2.23   0
   0  -6  31    3.87    2.05   0
   0  -4  31    1.08    1.92   0
  -3  -1  33   15.13    2.23   0
  -2  -8  34    4.37    1.96   0
  -2  -2  33   12.71    2.30   0
  -2   0  31   -2.25    1.94   0
  -1  -9  32   53.79    2.10   0
  -1  -7  33    1.69    1.95   0
  -1  -5  33   37.03    2.25   0
  -1  -3  32   12.78    2.09   0
   0  -8  30   10.12    2.27   0
   0  -2  29   14.91    1.93   0
   1  -5  27   15.83    1.64   0
  -5  -1  33   60.20    2.37   0
  -4  -4  35   58.02    2.35   0
  -4  -2  34    5.70    2.03   0
  -3  -9  34    3.88    1.78   0
  -3  -7  35    4.26    1.86   0
  -3  -5  35   16.73    2.30   0
  -3   1  30    7.11    1.98   0
  -2  -6  34    4.65    1.73   0
  -1  -1  30  101.80    2.42   0
   0  -6  30    2.86    1.91   0
   0  -4  30   11.15    1.90   0
  -5  -5  35   85.22    2.02   0
  -5  -3  34   36.66    2.41   0
  -4  -6  35  129.83    2.37   0
  -3  -3  34   23.68    1.95   0
  -2 -10  32   19.93    2.27   0
  -2  -2  32    9.01    2.12   0
  -2   0  30  546.90    4.21   0
  -1  -9  31   20.15    2.18   0
  -1  -5  32   91.01    2.64   0
  -1  -3  31   22.63    2.19   0
   0  -4  29    2.93    2.04   0
   0  -2  28   -1.66    1.68   0
  -4   0  31    5.84    2.30   0
  -3  -5  34   32.65    2.34   0
  -3   1  29   53.64    2.08   0
  -2  -8  33   -2.40    2.17   0
  -2  -4  33    5.85    2.24   0
  -1  -1  29   14.81    1.85   0
   0  -8  29   15.97    1.96   0
   0  -6  29  175.37    3.02   0
  -4  -8  34   11.29    1.76   0
  -4  -2  33    0.10    2.07   0
  -3  -7  34    3.14    1.99   0
  -2  -2  31    3.39    2.07   0
  -2   0  29    3.10    1.83   0
  -1  -5  31  116.45    2.67   0
  -1  -3  30    2.51    2.05   0
   0  -4  28  101.43    2.35   0
  -6  -4  33   15.63    1.82   0
  -5  -7  34   16.93    1.81   0
  -5  -5  34   -3.59    1.93   0
  -4  -6  34    5.34    2.02   0
  -3  -1  31   18.47    2.17   0
  -3   1  28  167.31    2.93   0
  -2 -10  31    2.81    1.78   0
  -2  -8  32    7.04    2.42   0
  -1  -1  28   89.79    2.32   0
   0  -8  28   42.29    2.07   0
  -4   0  30  404.79    3.83   0
  -3 -11  31   74.34    1.97   0
  -3  -7  33   40.76    2.27   0
  -2  -6  32   -0.02    2.16   0
  -2   0  28   13.65    1.85   0
  -1  -5  30   13.73    2.09   0
   0  -6  28   11.58    1.78   0
  -6  -6  33    6.33    1.79   0
  -4 -10  32   39.99    1.92   0
  -4  -8  33    0.46    1.88   0
  -4  -4  33    3.08    2.01   0
  -3  -9  32   68.62    2.37   0
  -3  -3  32    1.69    2.09   0
  -3  -1  30    9.14    2.06   0
  -2  -4  31   13.37    2.19   0
  -2  -2  30  283.24    3.46   0
  -1  -9  29   12.85    2.10   0
  -1  -7  30   46.44    2.40   0
  -1  -3  29   15.13    1.60   0
   0  -8  27    0.40    1.76   0
  -6  -4  32    2.83    1.99   0
  -5  -7  33   31.20    2.02   0
  -5  -5  33   11.86    2.15   0
  -5  -3  32   45.93    2.17   0
  -4  -6  33    3.02    2.11   0
  -4   0  29    2.47    1.91   0
  -3   1  27   12.95    1.90   0
  -2 -10  30  129.52    2.61   0
   0  -6  27  317.10    3.28   0
  -5  -9  32    2.21    1.59   0
  -5  -1  30    3.27    2.09   0
  -4  -2  31   27.83    2.37   0
  -3  -7  32    2.34    1.84   0
  -3  -3  31   23.76    2.21   0
  -3  -1  29   59.38    2.60   0
  -2  -2  29   28.16    2.07   0
  -1  -7  29   54.47    2.29   0
  -1  -5  29   87.87    2.42   0
  -1  -3  28  154.54    2.69   0
   0  -8  26   71.79    2.19   0
  -6  -6  32   -2.20    1.63   0
  -6  -2  30    5.22    2.19   0
  -4  -8  32    4.21    2.04   0
  -2  -4  30    3.30    2.14   0
  -1  -9  28   41.19    2.20   0
   0  -6  26  156.15    2.54   0
  -6  -4  31   87.61    2.32   0
  -5  -7  32   12.42    2.07   0
  -5  -5  32   54.45    2.32   0
  -5  -3  31   14.44    2.11   0
  -4  -6  32    2.15    1.91   0
  -4   0  28   12.05    1.81   0
  -3  -5  31   36.36    2.46   0
  -3  -3  30   81.60    2.54   0
  -2  -6  30    1.53    2.33   0
  -2  -2  28   42.64    2.20   0
  -1  -7  28  182.62    2.93   0
  -1  -5  28    1.93    1.80   0
  -5  -9  31   24.48    1.87   0
  -5  -1  29   19.56    1.98   0
  -4  -4  31   15.69    2.30   0
  -3 -11  29   38.06    2.08   0
  -3  -1  28  178.01    2.87   0
  -2  -4  29   69.71    2.64   0
  -1  -9  27   10.97    2.19   0
  -7  -5  30   15.28    1.91   0
  -6  -6  31   15.12    2.02   0
  -6  -2  29   20.64    2.02   0
  -5  -5  31   12.25    2.18   0
  -4 -10  30   55.47    2.19   0
  -4   0  27   -3.00    1.87   0
  -3  -9  30   38.82    2.34   0
  -2  -8  29   20.11    2.45   0
  -2  -6  29  132.04    2.86   0
  -1  -7  27  124.88    2.60   0
  -1  -5  27  201.04    2.89   0
  -6  -4  30   42.27    2.28   0
  -5 -11  29   13.09    1.77   0
  -5  -7  31   16.64    2.41   0
  -5  -1  28   54.64    2.33   0
  -4 -12  28    8.72    1.73   0
  -4  -4  30   25.34    2.59   0
  -4  -2  29   74.82    2.48   0
  -3 -11  28   26.61    2.27   0
  -3  -7  30   23.93    2.32   0
  -3  -5  30   40.63    2.40   0
  -3  -3  29    3.23    2.11   0
  -3  -1  27   11.46    2.09   0
  -2  -4  28  168.88    3.03   0
  -1  -9  26    2.07    1.83   0
  -6  -8  30   10.99    1.86   0
  -5  -9  30   30.73    2.19   0
  -4   0  26   56.70    2.22   0
  -2 -10  27  103.39    2.78   0
  -2  -8  28   66.06    2.54   0
  -7  -7  29   46.44    2.17   0
  -7  -5  29  236.61    2.99   0
  -6 -10  29  161.87    2.39   0
  -6  -6  30   18.61    2.23   0
  -5  -3  29   45.77    2.53   0
  -4 -10  29  123.93    2.80   0
  -4  -8  30    1.40    1.81   0
  -4  -2  28  101.62    2.61   0
  -3  -5  29   20.88    2.47   0
  -3  -3  28  201.74    3.24   0
  -2  -6  28    5.92    2.13   0
  -2  -4  27    2.05    1.89   0
  -1  -9  25    4.63    2.14   0
  -1  -7  26   19.65    1.88   0
  -6  -4  29    0.76    2.19   0
  -5 -11  28   -1.13    1.82   0
  -5  -7  30    2.03    1.85   0
  -5  -1  27    5.98    2.06   0
  -4 -12  27   37.36    2.16   0
  -4  -4  29    5.67    2.27   0
  -3 -11  27    0.30    1.94   0
  -8  -6  27  330.05    2.96   0
  -6  -8  29    0.85    2.11   0
  -5  -9  29    7.52    2.22   0
  -4  -2  27   12.46    1.99   0
  -3  -9  28  106.30    3.02   0
  -3  -5  28   19.87    2.40   0
  -3  -3  27    3.43    1.89   0
  -2 -10  26   32.27    2.21   0
  -2  -8  27   28.54    2.28   0
  -2  -6  27  139.31    2.87   0
  -1  -7  25  126.24    2.49   0
  -7  -7  28   -0.07    1.98   0
  -7  -5  28   24.97    2.24   0
  -6 -10  28    4.46    1.85   0
  -6  -6  29   20.99    2.38   0
  -6  -2  27   11.69    2.10   0
  -5  -3  28   13.31    2.22   0
  -5  -1  26   11.72    1.89   0
  -4 -12  26   17.07    2.09   0
  -4 -10  28   10.91    2.17   0
  -4  -6  29   28.31    2.52   0
  -4  -4  28   94.35    2.69   0
  -3  -7  28   48.60    2.53   0
  -1  -9  24  157.31    2.63   0
  -5 -13  25   15.24    1.69   0
  -5 -11  27   20.40    2.08   0
  -2 -10  25   37.63    2.20   0
  -2  -8  26  195.08    3.11   0
  -2  -6  26   49.18    2.21   0
  -8  -6  26   12.98    2.04   0
  -7  -9  27    2.75    1.97   0
  -7  -5  27   14.13    2.46   0
  -7  -3  26   33.51    2.30   0
  -6  -8  28   37.59    2.47   0
  -6  -6  28   13.78    2.32   0
  -6  -2  26   81.42    2.43   0
  -5  -9  28   -3.19    2.07   0
  -5  -5  28    2.69    2.20   0
  -5  -3  27    0.54    2.04   0
  -4 -10  27  189.75    3.12   0
  -4  -2  26   18.12    2.05   0
  -3  -5  27  150.47    3.05   0
  -3  -3  26   11.21    1.91   0
  -1  -9  23   67.04    2.35   0
  -7  -7  27   41.01    2.34   0
  -6 -12  25    3.74    2.01   0
  -6  -4  27   75.99    2.90   0
  -5 -13  24   40.15    2.29   0
  -5  -1  25    3.21    1.82   0
  -4 -12  25   13.92    2.20   0
  -4  -4  27    6.63    2.16   0
  -3  -7  27    8.00    2.27   0
  -2  -8  25    3.14    1.98   0
  -5  -9  27   25.98    2.05   0
  -4  -8  27   -0.78    2.31   0
  -4  -2  25   25.71    2.02   0
  -3  -9  26   59.73    2.65   0
  -3  -5  26   34.29    2.34   0
  -2 -10  24   -0.63    1.97   0
  -2  -6  25   32.47    2.00   0
  -8  -8  25   23.16    1.96   0
  -8  -6  25    1.42    2.05   0
  -7  -5  26    5.10    2.05   0
  -6 -10  26    4.14    2.29   0
  -6  -2  25   34.10    2.26   0
  -5  -5  27    0.24    2.18   0
  -5  -3  26   13.16    2.16   0
  -5  -1  24  308.30    3.44   0
  -4  -6  27  158.22    3.14   0
  -4  -4  26  118.34    2.73   0
  -3  -7  26    1.37    2.26   0
  -7  -7  26   -0.27    2.38   0
  -6 -12  24   72.85    2.21   0
  -6  -4  26   37.20    2.92   0
  -5 -13  23   58.26    2.33   0
  -5  -7  27   14.35    2.43   0
  -4 -12  24  147.56    2.74   0
  -3 -11  24   39.79    2.49   0
  -3  -9  25  127.57    3.00   0
  -2 -10  23   14.73    2.19   0
  -2  -8  24    2.80    1.92   0
  -7 -11  24   67.33    2.20   0
  -6  -2  24   20.57    2.65   0
  -5 -11  25  139.05    3.02   0
  -5  -5  26    2.91    2.17   0
  -5  -3  25   35.38    2.23   0
  -4  -8  26   69.22    2.70   0
  -4  -6  26    7.47    2.34   0
  -3  -7  25    2.48    2.12   0
  -3  -5  25   93.77    2.71   0
  -8  -8  24    1.72    1.88   0
  -8  -6  24   20.50    2.34   0
  -7  -9  25    3.93    2.24   0
  -7  -5  25  321.64    3.86   0
  -7  -3  24   10.15    2.45   0
  -6 -10  25    5.66    2.42   0
  -6  -8  26   17.94    2.14   0
  -4 -12  23   39.41    2.17   0
  -4  -4  25   15.01    2.12   0
  -3 -11  23  107.71    2.99   0
  -2 -10  22   19.77    1.99   0
  -2  -8  23   20.26    1.95   0
  -7  -7  25  147.58    3.03   0
  -6  -4  25    1.37    2.27   0
  -5 -11  24  154.44    3.07   0
  -4  -8  25   54.91    2.64   0
  -3  -9  24  113.18    2.89   0
  -7  -9  24    2.28    2.39   0
  -7  -3  23   52.72    2.94   0
  -6 -14  20    5.94    1.76   0
  -6  -6  25  133.68    3.12   0
  -6  -2  23   71.05    2.53   0
  -5  -5  25  110.21    3.12   0
  -5  -3  24    4.58    2.10   0
  -4 -10  24   32.39    2.75   0
  -4  -6  25   10.12    2.38   0
  -4  -4  24    6.88    2.04   0
  -3 -11  22  311.21    3.96   0
  -3  -7  24   23.67    2.29   0
  -9  -7  21   -0.55    2.21   0
  -8 -10  22   23.48    2.02   0
  -8  -6  23   61.74    2.40   0
  -7  -7  24    4.87    2.93   0
  -6 -10  24   24.99    2.21   0
  -6  -4  24   32.05    2.51   0
  -5 -13  21  163.88    3.42   0
  -3  -9  23   64.13    2.61   0
  -2 -10  21   18.31    1.95   0
  -7 -13  20   -2.22    2.08   0
  -6 -14  19  110.96    2.85   0
  -6 -12  22   62.02    2.70   0
  -5 -11  23   71.77    2.74   0
  -5  -9  24    0.83    2.54   0
  -5  -3  23   76.33    2.57   0
  -4 -10  23   57.25    2.76   0
  -4  -8  24   10.02    2.48   0
  -4  -6  24    1.68    2.35   0
  -3  -7  23    4.36    2.01   0
  -8  -8  22    5.83    2.48   0
  -8  -6  22    3.02    2.84   0
  -7  -5  23   40.51    2.87   0
  -7  -3  22   12.55    2.32   0
  -6 -10  23    3.52    2.09   0
  -6  -2  22   85.42    2.56   0
  -5  -7  24   12.67    2.58   0
  -5  -5  24   51.12    2.54   0
  -3 -11  21    5.18    2.41   0
  -2 -10  20    5.78    1.93   0
  -9  -7  20    5.88    2.29   0
  -7 -13  19   16.01    2.12   0
  -7  -7  23   12.85    2.59   0
  -6 -12  21   -1.17    2.60   0
  -6  -4  23   47.06    2.53   0
  -5 -13  20    2.76    2.42   0
  -4  -8  23    8.69    2.61   0
  -3  -9  22    2.71    2.26   0
  -7 -11  21   -0.27    2.46   0
  -6  -8  23   84.17    3.13   0
  -6  -2  21   19.64    2.42   0
  -5  -5  23   58.51    2.70   0
  -5  -3  22   14.66    2.55   0
  -4 -10  22    3.48    2.33   0
  -4  -6  23   -2.72    2.30   0
  -3 -11  20   25.60    2.46   0
  -8 -10  20   50.44    2.59   0
  -8  -8  21   80.33    3.00   0
  -8  -6  21   22.39    2.47   0
  -7  -9  22    0.28    2.19   0
  -7  -5  22   17.76    3.10   0
  -7  -3  21  234.41    3.54   0
  -6 -10  22  109.60    2.85   0
  -6  -6  23   53.04    2.81   0
  -6  -4  22   48.25    2.52   0
  -5 -13  19   12.24    2.67   0
  -5  -7  23   72.45    3.08   0
  -4 -12  20  338.32    4.16   0
  -3  -9  21   18.91    2.24   0
  -9  -7  19  113.09    3.03   0
  -8 -12  18   15.86    2.19   0
  -7 -13  18   19.76    2.14   0
  -7 -11  20   87.75    2.95   0
  -6 -14  17   90.80    3.04   0
  -5 -11  21    0.34    2.74   0
  -4 -10  21   17.86    2.45   0
  -4  -8  22   -1.13    2.29   0
  -4  -6  22  124.90    3.05   0
  -9  -9  18    2.44    1.90   0
  -8  -8  20    7.01    2.97   0
  -7  -3  20   30.15    2.49   0
  -6  -8  22   21.15    2.84   0
  -6  -6  22    8.77    2.35   0
  -5  -7  22   81.58    3.03   0
  -5  -5  22   36.62    2.40   0
  -3 -11  19   26.90    2.22   0
  -9  -7  18   -4.35    2.48   0
  -8 -12  17    1.09    2.26   0
  -8 -10  19  175.69    3.36   0
  -8  -4  19   11.89    3.18   0
  -7 -13  17   13.54    2.37   0
  -7  -7  21   12.85    2.50   0
  -7  -5  21   12.52    2.60   0
  -6 -12  19    3.18    2.50   0
  -6  -4  21   21.97    2.36   0
  -5 -13  18   17.85    2.31   0
  -4  -8  21    1.54    2.25   0
  -3  -9  20  119.85    2.77   0
  -9  -9  17   54.47    2.51   0
  -7 -11  19   76.30    2.95   0
  -6 -14  16   18.28    2.37   0
  -6  -8  21   -0.25    2.57   0
  -5  -9  21   70.68    2.87   0
  -5  -5  21   22.92    2.18   0
  -4 -10  20  138.70    3.15   0
  -3 -11  18  130.63    2.76   0
  -9 -11  15  101.80    2.77   0
  -8 -12  16    6.79    2.41   0
  -8 -10  18    5.26    2.50   0
  -8  -8  19   17.28    2.79   0
  -7  -3  19    1.35    2.07   0
  -6 -10  20  218.50    3.69   0
  -6  -6  21   96.63    3.06   0
  -5  -7  21   36.97    2.71   0
  -4 -12  18   60.00    2.57   0
 -10  -8  14   11.26    1.98   0
  -9  -7  17   58.46    2.65   0
  -8  -4  18   60.46    2.78   0
  -7 -13  16    1.47    2.28   0
  -7 -11  18   39.34    2.31   0
  -7  -7  20   58.43    2.79   0
  -6 -12  18    7.35    2.46   0
  -6  -4  20  106.38    2.78   0
  -5 -11  19   24.12    2.67   0
  -5  -9  20   64.30    2.85   0
  -4 -10  19  161.92    3.13   0
  -4  -8  20    8.26    2.25   0
  -9  -9  16   22.50    2.44   0
  -8  -8  18   98.41    3.36   0
  -6 -10  19  145.10    3.33   0
  -6  -8  20    8.04    2.65   0
  -6  -6  20   51.08    2.55   0
  -4 -12  17   21.99    2.46   0
  -3 -11  17    6.68    2.11   0
 -10  -8  13   17.45    2.10   0
  -9 -11  14   22.26    2.08   0
  -9  -7  16   37.55    2.45   0
  -8 -10  17    5.89    2.47   0
  -8  -6  18   35.81    2.85   0
  -7 -13  15   26.41    2.67   0
  -7  -7  19   -0.86    2.34   0
  -7  -5  19   -0.14    2.24   0
  -7  -3  18   23.34    2.36   0
  -6 -14  14   95.50    3.12   0
  -6  -4  19   80.50    2.50   0
  -5 -11  18  293.99    3.81   0
  -5  -7  20  331.68    4.02   0
  -9  -9  15    8.14    2.36   0
  -8  -4  17   76.38    2.66   0
  -7 -11  17   69.01    2.50   0
  -6  -8  19   69.82    2.83   0
  -4 -12  16   -1.68    2.58   0
  -4 -10  18    7.12    2.03   0
  -3 -11  16   23.93    1.95   0
 -10  -8  12   24.56    2.52   0
  -9 -11  13    5.45    2.06   0
  -8 -12  14   32.08    2.42   0
  -8 -10  16   50.89    2.54   0
  -8  -6  17   98.47    3.17   0
  -7 -13  14   28.95    2.55   0
  -7  -9  18    7.40    2.59   0
  -7  -5  18   19.16    2.23   0
  -7  -3  17   94.76    2.80   0
  -6 -10  18   13.97    2.48   0
  -6  -6  19   10.12    2.14   0
  -5 -13  15   55.67    2.95   0
  -5  -7  19   10.99    2.14   0
  -9  -9  14   32.23    2.92   0
  -9  -7  15  305.93    3.64   0
  -8  -4  16   -0.30    2.18   0
  -7 -15  10   12.55    1.97   0
  -7 -11  16   12.84    2.13   0
  -7  -7  18   -2.67    2.29   0
  -5 -11  17  109.88    2.77   0
  -5  -9  18   50.59    2.63   0
  -4 -10  17   40.05    2.32   0
  -9 -11  12    0.43    2.07   0
  -8 -14  10   24.99    2.13   0
  -8 -12  13   54.86    2.60   0
  -8 -10  15  124.52    2.87   0
  -6 -10  17   47.80    2.67   0
  -6  -8  18  288.06    4.02   0
  -6  -6  18   21.25    2.19   0
  -5 -13  14    2.48    2.42   0
  -4 -12  15    5.83    2.10   0
 -10  -8  11    1.03    2.06   0
  -9  -7  14  101.90    2.72   0
  -8  -6  16  107.73    3.12   0
  -7 -15   9   36.69    2.08   0
  -7  -7  17   21.13    2.30   0
  -7  -5  17    8.97    2.08   0
  -7  -3  16  116.13    2.78   0
  -6 -14  12   51.30    2.43   0
  -5 -11  16   40.76    2.51   0
  -5  -7  18    9.91    2.02   0
 -10 -10   9    4.98    2.13   0
  -9 -11  11    5.73    2.45   0
  -9  -9  13    3.77    2.41   0
  -8 -14   9  123.93    2.50   0
  -8  -4  15    2.41    2.04   0
  -6  -8  17    0.51    2.33   0
  -5  -9  17   28.42    2.26   0
  -4 -10  16   49.78    2.23   0
 -10  -8  10   87.70    2.55   0
  -9  -7  13   28.18    2.32   0
  -8 -12  12  130.91    2.96   0
  -8 -10  14    3.03    2.08   0
  -8  -8  15    2.48    2.32   0
  -8  -6  15   28.87    2.53   0
  -7 -15   8    0.07    1.95   0
  -7 -13  12  192.92    3.27   0
  -7  -5  16  100.40    2.87   0
  -6 -14  11  214.45    3.06   0
  -6 -12  14   47.87    2.77   0
  -6 -10  16    8.07    2.27   0
  -6  -6  17    6.59    2.04   0
  -5 -13  13  193.97    3.27   0
  -5 -11  15   90.11    2.68   0
 -10 -10   8   31.19    2.18   0
  -9  -9  12   33.47    2.55   0
  -8  -4  14  127.12    3.13   0
  -7  -7  16  408.25    4.15   0
  -5  -9  16  191.81    3.07   0
  -4 -10  15   -0.88    1.79   0
 -10  -8   9   60.47    2.69   0
  -9 -11  10   60.41    2.53   0
  -9  -5  12    2.74    2.82   0
  -8 -12  11   -0.04    2.41   0
  -8 -10  13   25.47    2.21   0
  -8  -8  14   60.11    2.59   0
  -7 -13  11   42.63    2.48   0
  -7  -9  15   45.47    2.68   0
  -6 -14  10  185.52    2.86   0
  -6 -12  13   83.89    2.94   0
  -6  -8  16   65.94    2.78   0
  -5 -13  12  105.46    2.93   0
  -4 -12  13    8.51    1.93   0
 -10 -10   7    2.45    1.86   0
  -9 -13   6    1.94    1.96   0
  -9  -9  11   23.42    2.34   0
  -9  -7  12   45.54    2.66   0
  -7 -11  13   18.23    2.70   0
  -7  -7  15   80.97    2.77   0
  -7  -5  15   65.72    2.36   0
  -6  -6  16  275.71    3.40   0
  -5 -11  14   59.03    2.41   0
 -10  -8   8  101.03    2.70   0
  -9 -11   9   17.12    2.34   0
  -8 -12  10   82.04    2.76   0
  -8  -8  13   13.24    2.40   0
  -8  -4  13   54.51    2.41   0
  -7 -13  10    3.17    2.47   0
  -7  -9  14   22.38    2.41   0
  -6 -14   9  187.85    2.85   0
  -6 -10  14   51.04    2.60   0
  -5 -13  11   11.49    2.14   0
  -5  -9  15   30.58    2.13   0
  -4 -12  12    3.12    1.91   0
 -10 -10   6    7.52    1.85   0
  -9  -9  10   35.45    2.50   0
  -9  -5  11  109.86    2.88   0
  -8  -6  13  338.16    3.84   0
  -7 -11  12   17.63    2.44   0
  -6 -12  12   53.86    2.55   0
  -6  -8  15    6.28    1.62   0
  -5 -11  13    7.31    1.99   0
 -10  -8   7   27.85    2.34   0
  -8 -14   5   73.52    2.20   0
  -8 -12   9    1.75    2.19   0
  -7 -13   9   33.82    2.56   0
  -7  -7  14  292.86    3.63   0
  -6 -14   8    1.51    2.12   0
  -5 -13  10   33.26    2.52   0
  -5  -9  14  204.54    3.00   0
  -9  -5  10  109.98    2.73   0
  -8  -4  12   76.70    2.28   0
  -7 -15   4   34.12    2.36   0
  -7 -11  11    9.69    2.38   0
  -7  -9  13    6.87    2.31   0
  -6 -12  11    2.88    2.24   0
  -6 -10  13  251.13    3.59   0
  -6  -8  14   92.12    2.72   0
  -4 -12  11   21.01    1.86   0
 -10  -8   6    2.34    2.12   0
  -8 -12   8   22.57    2.17   0
  -8  -6  12   11.53    2.11   0
  -7 -13   8  280.84    3.53   0
  -7  -7  13   30.47    2.21   0
  -7  -5  13    2.91    1.84   0
  -5 -11  12   94.86    2.50   0
 -10  -6   6   13.14    2.12   0
  -8  -8  11   52.95    2.69   0
  -8  -4  11   52.97    2.27   0
  -7  -9  12    4.79    2.25   0
  -6 -12  10  194.05    3.18   0
  -6 -10  12    4.29    2.22   0
  -5 -13   9   83.11    2.47   0
  -4 -12  10  140.14    2.58   0
 -10  -8   5   11.72    2.09   0
  -8 -12   7    1.27    1.86   0
  -8  -6  11   69.13    2.42   0
  -7 -13   7  145.04    3.07   0
  -7 -11  10    6.36    2.31   0
  -6  -8  13   22.37    2.13   0
  -5 -11  11   -0.86    2.04   0
 -10  -6   5   12.27    2.09   0
  -9 -11   5    5.51    2.34   0
  -8  -8  10   42.19    2.39   0
  -7  -9  11   -5.31    2.30   0
  -7  -7  12    8.91    1.97   0
  -7  -5  12    6.37    2.01   0
  -6 -12   9   22.15    2.25   0
  -5 -13   8  150.57    2.80   0
  -4 -12   9   55.34    2.06   0
 -10  -8   4   98.80    2.51   0
  -9  -7   8   36.69    2.61   0
  -9  -5   8   38.29    2.16   0
  -8  -6  10   86.65    2.53   0
  -8  -4  10   31.02    1.98   0
  -7 -13   6   17.10    2.61   0
  -7 -11   9    3.05    2.24   0
  -6 -10  11    5.24    2.12   0
  -6  -8  12  221.54    3.13   0
  -5 -11  10   45.40    2.16   0
 -10  -6   4   49.06    2.35   0
  -9 -11   4   25.18    2.54   0
  -8 -10   8  184.54    3.30   0
  -8  -8   9   35.22    2.74   0
  -7  -9  10   50.42    2.63   0
  -7  -7  11   41.40    2.18   0
  -5 -13   7   42.95    2.27   0
  -9  -5   7    8.27    2.13   0
  -8  -4   9  260.57    3.17   0
  -7 -11   8   71.09    2.64   0
  -6 -10  10   -1.21    1.99   0
 -10  -6   3   73.64    2.59   0
  -9  -9   5    4.59    2.02   0
  -8 -12   4   28.55    2.05   0
  -8 -10   7    3.05    2.36   0
  -8  -6   9   29.78    2.13   0
  -6 -12   7   29.06    2.62   0
  -5 -13   6  127.32    2.71   0
  -5 -11   9    4.01    1.84   0
  -9  -7   6  287.66    3.75   0
  -9  -5   6    3.08    1.98   0
  -8  -8   8  343.88    3.78   0
  -7 -11   7   19.19    2.48   0
  -7  -9   9   13.06    2.35   0
  -7  -7  10   18.74    2.02   0
  -6 -10   9   31.25    2.16   0
 -10  -8   1    4.14    2.09   0
 -10  -6   2   34.41    2.27   0
  -9 -13  -4    5.04    2.20   0
  -8 -12   3   13.00    2.08   0
  -8  -6   8   30.68    2.17   0
  -8  -4   8  230.82    2.99   0
  -7 -15  -3    1.38    2.20   0
  -5 -13   5   50.38    2.25   0
  -5 -11   8   12.10    1.82   0
  -9  -7   5   22.92    2.48   0
  -9  -5   5   35.44    2.59   0
  -7 -11   6   18.10    2.49   0
  -7  -9   8    1.75    2.20   0
  -7  -7   9   12.74    1.93   0
  -6 -12   6   58.84    2.48   0
  -6 -10   8   10.97    2.00   0
  -8 -14  -4   66.80    2.28   0
  -8  -6   7    2.13    1.90   0
  -8  -4   7    2.69    1.73   0
  -9  -7   4   46.16    2.62   0
  -8 -14  -5   77.36    2.27   0
  -8  -8   6   41.23    2.51   0
  -7 -11   5   76.11    2.81   0
  -7  -9   7   39.31    2.41   0
  -7  -7   8  104.05    2.53   0
  -6 -12   5   24.57    2.33   0
  -5 -11   7    8.72    1.74   0
  -9  -5   4    1.02    2.07   0
  -8 -14  -6    8.28    1.94   0
  -6 -10   7  150.56    2.80   0
  -8 -14  -7   13.65    2.17   0
  -8  -8   5   12.30    2.16   0
  -8  -4   6    9.01    1.76   0
  -7 -15  -7    8.30    2.16   0
  -7 -11   4   11.79    2.36   0
  -7  -9   6  257.16    3.49   0
  -6 -12   4    4.22    2.15   0
  -5 -11   6   29.02    2.05   0
  -9  -5   3   19.22    2.23   0
  -7 -15  -9    0.96    2.14   0
  -7 -15  -8   12.75    1.86   0
  -7  -7   7   28.80    2.04   0
  -6 -10   6   81.51    2.50   0
  -8 -10   2   11.69    2.46   0
  -8  -8   4  243.88    3.43   0
  -8  -6   5   26.55    2.07   0
  -8  -4   5   64.12    2.13   0
  -7 -15 -10   14.87    1.89   0
  -7 -11   3   23.29    2.30   0
  -6 -12   3   13.55    2.20   0
 -10  -8  -5   -1.95    2.53   0
  -9  -5   2    4.18    2.08   0
  -7  -9   5   20.64    2.28   0
  -6 -10   5   66.19    2.25   0
  -8 -10   1   56.84    2.69   0
  -8  -8   3   20.40    2.37   0
  -8  -6   4    5.68    2.02   0
  -7 -11   2  278.53    3.56   0
  -6 -12   2   10.11    2.12   0
  -9  -7   0  267.90    3.66   0
  -9  -5   1   46.60    2.42   0
  -7  -9   4  226.05    3.31   0
  -6 -12   1    2.45    2.48   0
  -6 -10   4   99.59    2.44   0
  -9 -11  -7    5.62    2.53   0
  -8  -8   2  192.37    3.26   0
  -8  -6   3    7.31    2.03   0
 -10  -6  -6    1.68    2.27   0
  -9 -11  -8   23.40    2.60   0
  -9  -7  -1   46.30    2.66   0
  -9  -5   0    8.66    2.22   0
  -7  -9   3  122.81    2.83   0
  -6 -12   0  205.33    3.19   0
  -5 -13  -1  198.67    2.94   0
 -10  -8 -10  103.41    2.95   0
 -10  -8  -9    0.75    2.23   0
 -10  -6  -7   94.38    3.08   0
  -9 -11  -9   77.11    2.66   0
  -9  -5  -1   17.20    2.51   0
  -8  -8   1   14.97    2.53   0
  -8  -6   2  176.06    2.96   0
  -6 -10   3   38.91    2.03   0
 -10  -8 -11    1.22    2.19   0
  -9 -11 -11  115.96    2.70   0
  -9 -11 -10   10.91    2.25   0
  -7 -11  -1   12.74    2.20   0
  -7  -9   2   60.48    2.50   0
  -6 -14  -7    6.54    2.16   0
  -6 -12  -1    1.40    2.08   0
  -5 -13  -2   24.80    2.06   0
 -10  -8 -13    5.27    2.06   0
 -10  -8 -12   10.91    2.12   0
 -10  -6  -8   20.19    2.52   0
  -9 -11 -13   24.18    2.72   0
  -9 -11 -12  246.86    3.30   0
  -9  -5  -2   10.46    2.14   0
  -8  -8   0   10.09    2.29   0
  -6 -14  -8   14.26    2.12   0
  -6 -10   2  102.69    2.40   0
 -10  -8 -14    6.60    2.36   0
 -10  -6  -9  101.75    2.82   0
  -9 -11 -14    3.35    2.37   0
  -8  -6   1   82.28    2.47   0
  -7  -9   1    2.48    2.14   0
  -6 -12  -2    8.31    2.13   0
  -5 -13  -3   25.24    2.03   0
 -10  -6 -11   38.56    2.88   0
 -10  -6 -10   13.78    2.43   0
  -9  -5  -3    3.49    2.05   0
  -8 -12 -10   59.85    2.79   0
  -7 -13  -9    2.52    2.38   0
  -6 -14 -10   97.51    2.66   0
  -6 -12  -3  129.76    3.15   0
  -6 -10   1  133.32    2.60   0
  -5 -13  -4    0.66    2.01   0
 -10  -6 -12    6.13    2.24   0
  -8 -12 -11   10.97    2.58   0
  -8  -6   0    1.13    2.02   0
  -7 -13 -10    2.43    2.26   0
  -7  -9   0   95.79    2.71   0
  -6 -14 -11   25.52    2.22   0
 -10  -6 -14   32.51    2.28   0
 -10  -6 -13   53.47    2.49   0
  -9  -5  -4   25.12    2.22   0
  -8 -12 -14  142.18    2.97   0
  -8 -10  -6   40.59    3.12   0
  -8  -6  -1    5.23    2.41   0
  -7 -13 -11    4.62    2.49   0
  -7 -11  -4  197.03    3.32   0
  -6 -14 -13   45.84    2.67   0
  -6 -14 -12    2.08    2.10   0
  -6 -12  -4  152.78    2.93   0
  -6 -10   0  348.72    3.56   0
  -5 -13  -5  266.13    3.37   0
 -10  -6 -16    3.32    2.64   0
 -10  -6 -15  228.54    3.31   0
  -9  -5  -5   31.00    2.35   0
  -8 -12 -17   26.17    2.11   0
  -8 -12 -16   70.06    2.74   0
  -8 -12 -15    9.91    2.34   0
  -8  -8  -3   52.97    2.73   0
  -7 -13 -13   35.82    2.37   0
  -7 -13 -12   -1.11    2.36   0
  -7 -11  -5  116.11    2.93   0
  -6 -14 -14   62.83    2.44   0
  -5 -13  -6    6.28    2.37   0
  -9  -9 -12   39.35    2.81   0
  -9  -9 -11   80.88    3.08   0
  -8  -6  -2  105.45    2.69   0
  -7 -13 -16    0.76    2.58   0
  -7 -13 -15    0.59    2.35   0
  -7 -13 -14   12.22    2.12   0
  -6 -12  -5   16.80    2.15   0
  -6 -10  -1  159.19    2.77   0
  -9  -9 -14    9.14    3.11   0
  -9  -9 -13    3.09    2.66   0
  -9  -5  -6   18.10    2.21   0
  -7 -13 -18   31.56    2.16   0
  -7 -13 -17    8.37    2.18   0
  -6 -12  -6   64.96    2.48   0
  -5 -13  -7   31.65    2.26   0
  -9  -9 -19   20.17    2.78   0
  -9  -9 -18    4.47    2.84   0
  -9  -9 -17    8.55    2.88   0
  -9  -9 -16   15.33    2.54   0
  -9  -9 -15    8.50    2.70   0
  -9  -5  -7    0.95    2.23   0
  -8  -6  -3   36.98    2.30   0
  -7  -9  -3   12.04    2.20   0
  -6 -12  -7   54.39    2.38   0
  -6 -10  -2   52.05    2.16   0
  -5 -13  -8    0.45    1.98   0
  -6 -10  -3   -1.77    1.84   0
  -9  -5  -8   60.21    2.68   0
  -8  -8  -6  370.30    4.11   0
  -8  -4  -3   71.35    2.39   0
  -7 -11  -9   53.22    2.66   0
  -7  -9  -4    0.38    2.19   0
  -6 -12  -8   31.93    2.41   0
  -5 -13  -9   39.31    2.24   0
  -9  -7 -12    3.98    2.75   0
  -9  -5  -9    6.56    2.41   0
  -8 -10 -13   32.61    2.36   0
  -8 -10 -12   20.34    2.32   0
  -7 -11 -10   44.99    2.64   0
  -7  -9  -5   23.65    2.39   0
  -6 -12  -9   52.82    2.63   0
  -6 -10  -4   69.82    2.31   0
  -5 -13 -10   47.91    2.48   0
  -9  -7 -14    7.63    2.57   0
  -9  -7 -13  145.08    3.28   0
  -9  -5 -10   81.48    3.08   0
  -8 -10 -14  153.43    3.26   0
  -8  -6  -5   93.89    2.64   0
  -8  -4  -4   87.36    2.51   0
  -7 -11 -11  175.02    3.33   0
  -6 -12 -10    5.24    2.37   0
  -9  -7 -16   12.49    2.82   0
  -9  -5 -11   18.99    2.73   0
  -8 -10 -22   39.64    2.36   0
  -8 -10 -21   44.07    2.45   0
  -8 -10 -20    1.02    2.76   0
  -8 -10 -19    5.39    2.99   0
  -8 -10 -18    6.37    3.17   0
  -8 -10 -17   61.53    3.12   0
  -8 -10 -16   42.46    2.84   0
  -8 -10 -15  173.52    3.16   0
  -8  -8  -9   22.86    2.57   0
  -7 -11 -12  168.54    3.34   0
  -7  -9  -6    5.12    2.26   0
  -6 -12 -11    1.16    2.47   0
  -6 -10  -5   36.28    2.11   0
  -9  -7 -20   49.69    2.74   0
  -9  -7 -19  155.99    3.60   0
  -9  -7 -18   -0.48    2.98   0
  -9  -7 -17  167.35    3.70   0
  -9  -5 -12   10.00    2.92   0
  -8  -8 -10   26.88    2.56   0
  -8  -4  -5   13.30    2.06   0
  -7  -9  -7   62.90    2.68   0
  -6 -10  -6    4.76    1.97   0
  -5 -11  -6   52.55    2.06   0
  -8  -8 -11    3.75    2.90   0
  -9  -5 -15   64.94    2.73   0
  -8  -8 -12   13.96    2.63   0
  -8  -6  -8   38.82    2.30   0
  -7 -11 -23    4.63    2.02   0
  -7 -11 -22   28.62    2.36   0
  -7 -11 -21   22.75    2.62   0
  -7 -11 -20  160.63    3.92   0
  -7 -11 -19   46.27    3.48   0
  -7 -11 -18   71.67    2.99   0
  -7 -11 -17  117.23    3.22   0
  -7  -9  -8   21.04    2.51   0
  -7  -7  -5  396.13    3.94   0
  -6 -12 -14    7.59    2.62   0
  -6 -10  -7   67.44    2.61   0
  -5 -11  -7   68.93    2.38   0
  -9  -5 -23   22.05    2.26   0
  -9  -5 -18   29.89    3.78   0
  -9  -5 -16    5.49    2.32   0
  -8  -8 -13    8.68    2.66   0
  -8  -6  -9   64.72    2.47   0
  -8  -4  -7    7.78    2.23   0
  -7  -9  -9    4.67    2.49   0
  -6 -12 -23   -0.52    2.13   0
  -6 -12 -22  114.79    2.93   0
  -6 -12 -18   81.99    3.18   0
  -6 -12 -17    4.41    2.34   0
  -6 -10  -8   -1.46    1.99   0
  -9  -5 -20   35.14    3.15   0
  -9  -5 -19  333.24    4.58   0
  -8  -8 -14    4.31    2.84   0
  -7  -9 -10   63.57    2.87   0
  -7  -7  -6    6.52    1.96   0
  -6 -12 -21   95.21    2.96   0
  -5 -11  -8    7.01    1.83   0
  -8  -8 -25   -2.41    2.05   0
  -8  -8 -24   39.07    2.53   0
  -8  -4  -8   78.14    2.67   0
  -7  -9 -11  120.16    3.14   0
  -7  -7  -7  128.59    2.79   0
  -6 -10  -9  293.45    3.62   0
  -5 -11  -9   38.13    2.06   0
  -8  -8 -23    3.11    2.42   0
  -8  -8 -22    7.82    2.83   0
  -8  -8 -21   19.83    3.04   0
  -8  -8 -19   45.91    2.81   0
  -8  -8 -18   41.33    2.72   0
  -8  -8 -17  124.98    3.18   0
  -8  -6 -11    4.17    2.11   0
  -8  -4  -9   58.86    2.56   0
  -7  -9 -12    4.00    2.46   0
  -6 -10 -10   -0.31    2.25   0
  -5 -11 -10  242.01    3.24   0
  -8  -6 -12    2.33    2.08   0
  -8  -4 -10   27.59    2.37   0
  -7  -9 -13  103.61    3.25   0
  -7  -7  -8   57.85    2.38   0
  -6 -10 -11   74.72    2.62   0
  -8   0 -24  155.42    3.27   0
  -8   2 -28    3.15    1.70   0
  -7  -3 -18    5.27    2.10   0
  -7  -3 -17   25.99    2.37   0
  -7  -3 -16   -2.89    2.00   0
  -6  -2 -27  225.68    3.44   0
  -5  -3 -27   29.08    2.25   0
  -5   1 -34   22.25    2.43   0
  -4   2 -36   -0.48    1.70   0
  -3  -3 -28   62.61    2.20   0
  -7   1 -30    8.69    2.22   0
  -6   0 -31   -2.42    1.84   0
  -5  -3 -26   46.85    2.52   0
  -4  -2 -30    4.27    2.04   0
  -3  -1 -32   51.22    2.40   0
  -8   0 -23   -1.55    2.01   0
  -8   2 -27   14.06    1.91   0
  -7   1 -29   40.19    2.87   0
  -6  -2 -26  105.44    2.89   0
  -6   2 -33  117.45    2.42   0
  -5  -3 -25   73.66    2.67   0
  -5   3 -35   51.10    2.18   0
  -4  -2 -29   85.97    2.68   0
  -4   0 -33   -1.92    1.95   0
  -3  -3 -27    0.21    1.81   0
  -7  -1 -24  111.54    3.03   0
  -7   3 -31   83.73    2.29   0
  -6  -2 -25  158.30    3.19   0
  -6   0 -30  155.57    2.77   0
  -5  -3 -24   90.44    2.73   0
  -5  -1 -30   43.33    2.47   0
  -5   1 -33   26.27    2.27   0
  -4   2 -35   36.69    2.14   0
  -3  -3 -26   69.75    2.28   0
  -3  -1 -31   24.36    2.13   0
  -8   0 -20   70.77    2.95   0
  -8   2 -26    9.75    2.11   0
  -8   4 -28   21.34    1.99   0
  -7  -1 -23   73.07    3.25   0
  -7   1 -28   10.30    2.34   0
  -6  -2 -24    7.93    2.27   0
  -6   2 -32   69.99    2.45   0
  -5  -3 -23  168.06    3.10   0
  -5  -1 -29  104.35    2.79   0
  -4  -2 -28   48.44    2.31   0
  -4   4 -36   31.24    1.85   0
  -2  -2 -28    5.83    1.68   0
  -8   0 -19   -6.25    2.44   0
  -8   2 -25  211.73    3.15   0
  -7  -1 -22   14.93    2.73   0
  -7   3 -30   98.65    2.75   0
  -5  -3 -22   10.85    1.95   0
  -5   1 -32   70.02    2.56   0
  -5   3 -34   54.70    2.30   0
  -4   2 -34    1.41    1.92   0
  -3  -1 -30  108.43    2.60   0
  -8   2 -24    3.97    2.56   0
  -8   4 -27   10.92    1.92   0
  -7  -1 -21   37.94    2.35   0
  -7   1 -27  109.99    2.72   0
  -6  -2 -22    5.00    2.03   0
  -6   0 -28    5.83    2.31   0
  -6   4 -33   -0.38    1.90   0
  -4  -2 -27   55.88    2.31   0
  -4   0 -31    0.55    2.36   0
  -7  -1 -20  257.00    3.56   0
  -7   5 -31   22.58    1.83   0
  -6  -2 -21   -0.72    1.99   0
  -4  -2 -26   86.73    2.50   0
  -3  -1 -29   82.34    2.34   0
  -8   2 -23   74.70    2.45   0
  -8   4 -26   89.11    2.45   0
  -7  -1 -19   24.01    2.31   0
  -7   3 -29   11.88    2.34   0
  -6  -2 -20    0.69    1.82   0
  -6   0 -27    0.57    2.30   0
  -6   2 -30  106.27    2.64   0
  -5  -1 -27   59.75    2.50   0
  -5   3 -33    2.89    2.30   0
  -4  -2 -25  138.81    2.76   0
  -3   1 -32   53.76    2.49   0
  -7  -1 -18  106.16    2.84   0
  -7  -1 -17    0.63    2.20   0
  -7  -1 -16   -2.05    2.14   0
  -7   1 -25   10.67    2.25   0
  -7   3 -28  167.11    3.39   0
  -7   5 -30   16.30    2.02   0
  -6  -2 -19   46.15    2.29   0
  -6   0 -26   11.33    2.34   0
  -5  -1 -26   33.86    2.63   0
  -5   1 -30   46.25    2.51   0
  -3  -1 -28    0.85    1.77   0
  -3   3 -34   31.97    2.20   0
  -8   4 -25  116.60    2.55   0
  -7   1 -24  114.66    3.03   0
  -6   2 -29    2.55    2.05   0
  -5  -1 -25   37.96    2.43   0
  -5   3 -32   17.11    2.26   0
  -4   0 -29   -1.56    1.80   0
  -4   4 -34  108.28    2.58   0
  -4   6 -35   94.05    2.24   0
  -8   2 -20    4.13    2.24   0
  -8   6 -26   13.13    1.87   0
  -7   1 -23   70.89    3.27   0
  -7   3 -27  121.57    2.90   0
  -7   5 -29   26.46    2.14   0
  -6   0 -25   -4.85    2.16   0
  -6   4 -31   -0.27    2.12   0
  -6   6 -32   33.43    1.90   0
  -5   1 -29  104.40    2.84   0
  -3  -1 -27    5.93    1.76   0
  -3   1 -31   22.10    2.10   0
  -8   2 -19    6.87    2.56   0
  -6   0 -24   66.52    2.63   0
  -5  -1 -24  122.93    2.90   0
  -5   5 -33   36.11    2.13   0
  -4   0 -28    5.89    1.91   0
  -8   4 -23   -1.86    2.02   0
  -8   6 -25   17.88    2.21   0
  -7   1 -22   11.85    2.33   0
  -7   5 -28  109.61    2.69   0
  -6   0 -23   -3.27    2.17   0
  -5  -1 -23   74.94    2.53   0
  -5   1 -28  108.97    2.87   0
  -5   3 -31   68.20    2.28   0
  -4   4 -33   45.14    2.12   0
  -4   6 -34   11.88    1.92   0
  -3   1 -30  102.07    2.66   0
  -3   5 -34    0.35    1.87   0
  -8   4 -22   11.25    2.04   0
  -7   1 -21   35.08    2.35   0
  -7   7 -29   32.34    1.87   0
  -6   0 -22  218.50    3.27   0
  -6   2 -27  228.29    3.53   0
  -6   6 -31    5.54    1.98   0
  -5   5 -32    8.52    2.23   0
  -5   7 -33    9.09    1.73   0
  -4   0 -27   -2.32    1.87   0
  -3   3 -32  176.28    3.17   0
  -8   6 -24   12.64    2.18   0
  -7   1 -20  257.62    3.53   0
  -7   5 -27   11.80    2.19   0
  -6   0 -21    0.01    1.97   0
  -6   4 -29    8.06    1.98   0
  -5   1 -27   58.72    2.51   0
  -4   0 -26    1.70    1.91   0
  -4   2 -30    6.88    2.20   0
  -4   4 -32   86.14    2.50   0
  -3   1 -29   79.87    2.40   0
  -8   6 -23    8.29    2.54   0
  -7   1 -19   23.11    2.25   0
  -7   3 -24  125.04    3.03   0
  -7   7 -28  114.98    2.54   0
  -6   2 -26  106.24    2.91   0
  -6   6 -30   12.14    2.12   0
  -5   1 -26   34.91    2.44   0
  -4   6 -33    3.63    1.87   0
  -3   5 -33    2.11    1.99   0
  -7   1 -18  106.28    2.81   0
  -7   1 -17    4.28    2.15   0
  -7   5 -26   25.37    2.38   0
  -6   0 -20    8.79    1.88   0
  -5   5 -31   54.25    2.50   0
  -5   7 -32   10.74    2.07   0
  -4   0 -25   -0.33    1.76   0
  -4   2 -29   85.66    2.36   0
  -3   1 -28    4.17    1.74   0
  -3   3 -31  175.88    3.06   0
  -8   4 -19    2.70    2.39   0
  -8   6 -22   11.15    2.40   0
  -8   8 -23    2.58    2.19   0
  -7   1 -16   -1.64    1.86   0
  -7   3 -23  251.59    3.79   0
  -7   7 -27    5.87    2.05   0
  -6   8 -30  142.56    2.52   0
  -5   1 -25   38.93    2.42   0
  -4   8 -33   12.19    1.88   0
  -7   3 -22   24.30    2.43   0
  -7   5 -25   12.61    2.42   0
  -7   9 -27   30.32    1.94   0
  -6   2 -24   10.54    2.24   0
  -6   6 -29   72.30    2.52   0
  -5   1 -24  124.40    2.87   0
  -5   3 -28  185.02    3.20   0
  -5   5 -30   73.39    2.32   0
  -4   2 -28   53.00    2.32   0
  -4   6 -32   20.60    2.19   0
  -3   1 -27    7.32    1.75   0
  -3   7 -33    0.10    1.86   0
  -8   8 -22    4.28    2.01   0
  -7   3 -21   24.28    2.28   0
  -7   7 -26   64.42    2.53   0
  -6   2 -23   63.29    2.64   0
  -4   4 -30   18.29    2.44   0
  -8   6 -20   59.87    2.59   0
  -7   3 -20   53.48    2.50   0
  -7   9 -26    5.67    1.82   0
  -6   4 -26  301.19    3.83   0
  -6   6 -28   42.96    2.16   0
  -6   8 -29    6.70    1.95   0
  -5   1 -23   69.13    2.39   0
  -5   9 -31   15.08    1.85   0
  -4   2 -27   55.15    2.26   0
  -4   8 -32  286.72    3.26   0
  -3   3 -29   23.30    2.44   0
  -2   2 -28    5.31    1.92   0
  -8   8 -21   18.81    2.10   0
  -7   7 -25   11.05    2.31   0
  -6   2 -22    3.04    1.96   0
  -5   7 -30  145.05    2.96   0
  -4   4 -29    7.96    1.86   0
  -4   6 -31    9.56    2.13   0
  -3   5 -31    5.48    2.15   0
  -3   7 -32    3.36    1.97   0
  -8   8 -20   19.61    2.13   0
  -7   3 -19  175.33    3.10   0
  -7   9 -25    1.10    2.42   0
  -6   2 -21   -0.33    1.93   0
  -6   6 -27   29.12    2.12   0
  -6   8 -28   82.92    2.70   0
  -6  10 -28   40.88    2.35   0
  -5   3 -26   48.27    2.53   0
  -4   2 -26   91.05    2.47   0
  -8  10 -20    0.37    1.82   0
  -7   5 -22    1.17    2.55   0
  -7   7 -24   36.20    2.42   0
  -6   4 -24   49.99    2.52   0
  -5   3 -25   74.43    2.70   0
  -5   5 -28   20.32    2.35   0
  -4   2 -25  140.18    2.70   0
  -4   8 -31    5.24    2.17   0
  -4  10 -31    5.91    2.10   0
  -3   3 -28   65.79    2.19   0
  -3   5 -30   36.04    2.24   0
  -3   9 -32    2.56    1.69   0
  -8  10 -19    2.27    2.18   0
  -7   3 -17   24.22    2.15   0
  -7   5 -21   -0.53    2.39   0
  -7   9 -24   48.45    2.74   0
  -6   2 -19   43.31    2.11   0
  -6   8 -27    2.30    2.24   0
  -5   7 -29   54.25    2.15   0
  -4   4 -28  121.97    2.71   0
  -3   7 -31    9.14    1.90   0
  -7   3 -16   -3.81    1.84   0
  -7   7 -23   23.72    2.30   0
  -6   4 -23    3.36    2.32   0
  -6  10 -27   16.85    2.05   0
  -5   5 -27    5.72    2.16   0
  -5   9 -29   19.00    2.30   0
  -5  11 -29   24.97    1.78   0
  -7   5 -20   56.95    2.53   0
  -7   9 -23   40.83    2.79   0
  -7  11 -23    2.44    1.96   0
  -6   6 -25   12.43    2.29   0
  -6   8 -26  363.61    3.94   0
  -4   4 -27    3.22    2.06   0
  -4   6 -29    3.16    2.27   0
  -4   8 -30   85.25    2.48   0
  -3   5 -29   21.78    2.17   0
  -3   9 -31   82.83    2.41   0
  -3  11 -31   42.72    1.84   0
  -2   4 -28   99.92    2.47   0
  -7   5 -19  467.09    4.39   0
  -6   4 -22    0.82    2.14   0
  -6  10 -26  131.26    2.72   0
  -5   3 -23  170.00    3.04   0
  -4  10 -30  109.04    2.58   0
  -7   5 -18    8.43    2.26   0
  -7   9 -22    8.75    2.23   0
  -6   4 -21  178.06    3.07   0
  -6   6 -24   12.25    2.31   0
  -6  12 -25   43.33    2.27   0
  -5   9 -28  169.21    3.03   0
  -5  11 -28   17.52    1.80   0
  -4   4 -26  214.68    3.21   0
  -4   8 -29    8.16    2.15   0
  -4  12 -29    2.34    1.73   0
  -3   5 -28   25.35    2.09   0
  -7   5 -17  113.07    2.90   0
  -7   7 -20    8.20    2.94   0
  -6   6 -23   82.88    2.67   0
  -6   8 -25    7.43    1.99   0
  -5   3 -22   10.29    1.51   0
  -5   5 -25    8.89    2.24   0
  -4  10 -29    8.32    2.57   0
  -3   9 -30   89.99    2.42   0
  -3  11 -30    5.43    1.87   0
  -2   6 -29    2.45    2.07   0
  -7   9 -21   48.78    2.60   0
  -7  11 -21   19.60    2.09   0
  -6   4 -20   84.36    2.51   0
  -6  10 -25   56.22    2.44   0
  -5   7 -26    9.83    2.28   0
  -5   9 -27    1.41    1.83   0
  -5  11 -27    1.31    1.94   0
  -4   4 -25   36.12    2.17   0
  -4   6 -27   15.94    2.17   0
  -7   5 -16    6.14    1.96   0
  -7   7 -19  446.18    4.59   0
  -6   4 -19   43.08    2.04   0
  -6   6 -22   59.63    2.43   0
  -6  12 -24  169.95    2.82   0
  -5   5 -24   -1.67    2.19   0
  -4  12 -28    6.33    1.64   0
  -3   5 -27   59.78    2.21   0
  -7   5 -15   74.91    2.36   0
  -7   7 -18   -0.03    2.26   0
  -7   9 -20   30.65    2.37   0
  -7  11 -20  149.16    2.62   0
  -6   4 -18   67.32    2.39   0
  -6  10 -24    9.38    2.21   0
  -5   5 -23  143.27    2.95   0
  -5   7 -25   11.85    2.24   0
  -4   4 -24    7.95    1.87   0
  -4  10 -28  136.99    2.76   0
  -3   9 -29   14.82    1.92   0
  -3  11 -29   15.84    2.05   0
  -2   6 -28   34.85    2.00   0
  -2   8 -29    2.28    2.59   0
  -6   6 -21  429.80    4.25   0
  -6  12 -23    3.03    1.97   0
  -5  11 -26   97.89    2.58   0
  -4   6 -26   21.72    2.22   0
  -4   8 -27    3.48    2.04   0
  -3   5 -26    2.01    1.85   0
  -3  13 -28   34.59    2.15   0
  -7   7 -17   48.07    2.40   0
  -7  13 -18   30.15    1.89   0
  -6   6 -20   99.88    2.89   0
  -6   8 -22   -0.52    2.18   0
  -6  10 -23  149.10    3.00   0
  -5  13 -25    7.46    1.79   0
  -4  12 -27    6.18    1.93   0
  -7   7 -16   36.01    2.28   0
  -7  11 -18   67.57    2.68   0
  -7  13 -17    7.89    2.11   0
  -5   7 -24   60.21    2.59   0
  -5  11 -25    3.57    2.03   0
  -4   6 -25   62.70    2.49   0
  -4  10 -27   16.34    2.26   0
  -3   5 -25   68.28    2.25   0
  -3   7 -27   67.74    2.38   0
  -2   8 -28   52.30    2.16   0
  -7   7 -15  338.47    3.88   0
  -7   9 -17   58.08    2.71   0
  -6   6 -19   46.64    2.09   0
  -6   8 -21   67.68    2.55   0
  -6  10 -22   36.52    2.10   0
  -5   5 -21    4.11    2.11   0
  -5  13 -24    7.26    1.98   0
  -4   8 -26  202.08    3.24   0
  -3  13 -27   33.93    2.25   0
  -2  12 -28    2.40    2.10   0
  -7  13 -16   -0.80    1.71   0
  -6  12 -21   85.30    2.64   0
  -6  14 -20   20.18    1.81   0
  -5   7 -23   17.28    2.28   0
  -5   9 -24    6.43    2.35   0
  -5  11 -24    4.48    2.22   0
  -4   6 -24   -0.48    1.92   0
  -4  12 -26   22.03    2.20   0
  -4  14 -25  152.76    2.42   0
  -3   7 -26    0.31    2.03   0
  -2   6 -26   56.41    2.27   0
  -2  14 -27   61.05    1.94   0
  -7   9 -16   43.87    2.60   0
  -7  11 -16   48.15    2.85   0
  -7  13 -15    1.95    2.05   0
  -6   6 -18   -0.15    1.98   0
  -6   8 -20    0.78    2.03   0
  -5   5 -20   26.13    1.92   0
  -5  13 -23  165.40    3.04   0
  -4   8 -25   95.55    2.95   0
  -2   8 -27   46.08    2.18   0
  -7   9 -15   35.27    2.33   0
  -6   6 -17  112.16    2.60   0
  -6  12 -20   15.78    2.31   0
  -5   9 -23    8.25    2.48   0
  -4   6 -23   37.05    2.14   0
  -4  12 -25   37.05    2.72   0
  -3  13 -26  108.75    2.75   0
  -7   9 -14   -1.22    1.99   0
  -7  11 -15   10.77    2.23   0
  -7  13 -14    9.73    1.75   0
  -6   8 -19   38.98    2.16   0
  -5   7 -21   73.84    2.65   0
  -5  11 -23    1.74    1.89   0
  -5  15 -21    6.27    1.82   0
  -4   8 -24   28.12    2.25   0
  -4  14 -24   77.49    2.29   0
  -3   7 -25   16.45    1.94   0
  -3   9 -26   29.46    2.35   0
  -2   6 -25    7.43    1.73   0
  -2  10 -27   10.45    2.15   0
  -2  12 -27   24.06    2.06   0
  -2  14 -26   14.48    1.61   0
  -7  11 -14   49.52    2.33   0
  -6   6 -16    8.44    1.80   0
  -6   8 -18   20.87    2.10   0
  -6  10 -19    1.99    2.19   0
  -6  12 -19   27.75    2.26   0
  -5   9 -22   21.38    2.42   0
  -5  13 -22  167.26    2.98   0
  -4   6 -22   39.42    2.16   0
  -2   8 -26   92.27    2.40   0
  -5   7 -20   53.43    2.39   0
  -5  15 -20    6.05    1.94   0
  -4  10 -24   65.37    2.76   0
  -4  14 -23   63.70    2.29   0
  -3   7 -24   18.26    1.77   0
  -3   9 -25   33.48    2.25   0
  -3  13 -25    1.59    2.10   0
  -3  15 -24    5.45    1.76   0
  -6   8 -17   88.41    2.61   0
  -6  10 -18   58.61    2.65   0
  -6  12 -18   81.77    2.77   0
  -6  14 -17   11.63    2.14   0
  -5   9 -21    9.16    2.32   0
  -5  13 -21  132.05    3.05   0
  -2   8 -25   10.72    2.18   0
  -2  10 -26   13.04    2.17   0
  -2  12 -26   58.71    2.21   0
  -2  14 -25  267.77    3.36   0
  -6   8 -16  177.94    3.06   0
  -6  14 -16   10.83    2.41   0
  -5   7 -19  468.71    4.20   0
  -5  15 -19    3.81    1.81   0
  -4  10 -23   30.43    2.32   0
  -3   7 -23   41.87    2.03   0
  -3  15 -23   48.89    2.37   0
  -6  10 -17  211.17    3.51   0
  -6  12 -17    0.47    2.20   0
  -5   9 -20   17.92    2.45   0
  -5  13 -20   28.74    2.11   0
  -4   8 -22   10.67    2.11   0
  -4  14 -22   11.30    2.14   0
  -4  16 -20   28.88    1.91   0
  -3   9 -24   10.29    1.85   0
  -3  13 -24   75.80    2.60   0
  -2  10 -25   17.63    2.41   0
  -2  16 -23    9.75    1.62   0
  -6   8 -15   63.49    2.29   0
  -6  10 -16    5.44    2.15   0
  -6  14 -15  115.05    2.64   0
  -6  16 -12    2.34    2.01   0
  -5   7 -18   38.72    2.07   0
  -5  11 -20  140.55    3.17   0
  -5  15 -18   83.51    2.44   0
  -3  11 -24    0.69    2.35   0
  -2   8 -24    4.03    1.87   0
  -2  14 -24   39.69    2.54   0
  -6   8 -14   36.68    2.12   0
  -5   9 -19   21.30    2.39   0
  -5  13 -19    1.56    1.86   0
  -4   8 -21    6.72    2.05   0
  -4  10 -22    9.54    2.12   0
  -4  14 -21   37.94    2.40   0
  -3   9 -23    9.70    1.91   0
  -3  15 -22   -1.59    1.96   0
  -6  10 -15  246.48    3.50   0
  -6  16 -11   44.75    2.03   0
  -5  11 -19   74.97    2.74   0
  -5  15 -17   41.66    2.45   0
  -4  16 -19    3.37    1.89   0
  -3  11 -23    2.66    1.88   0
  -3  13 -23  157.11    2.96   0
  -2  16 -22    2.26    1.62   0
  -6   8 -13   49.67    2.43   0
  -6  10 -14   88.50    2.93   0
  -6  14 -13   46.96    2.19   0
  -6  16 -10  150.71    2.53   0
  -5   9 -18    7.46    2.09   0
  -5  13 -18    3.25    1.94   0
  -4   8 -20    7.51    1.90   0
  -4  10 -21    6.09    2.15   0
  -4  12 -21    0.99    2.20   0
  -4  14 -20   84.53    2.32   0
  -3  17 -19   17.91    1.94   0
  -2  14 -23  229.03    3.13   0
  -6   8 -12   24.32    2.21   0
  -6  12 -14    9.39    2.38   0
  -6  16  -9   50.57    2.35   0
  -5  11 -18    1.62    2.22   0
  -5  15 -16    4.41    2.14   0
  -5  17 -13   -0.05    1.90   0
  -4  16 -18   14.57    2.12   0
  -3  15 -21  121.64    2.75   0
  -1  11 -24    2.95    1.89   0
  -6  10 -13   63.88    2.65   0
  -6  12 -13    9.31    2.38   0
  -6  14 -12    4.71    2.21   0
  -5   9 -17   60.34    2.34   0
  -4   8 -19   -0.12    1.93   0
  -4  12 -20  257.51    3.59   0
  -3  11 -22  119.92    2.74   0
  -2  10 -23    2.29    1.92   0
  -2  12 -23  129.29    2.98   0
  -2  16 -21   -0.20    1.81   0
  -6  10 -12   30.32    2.13   0
  -6  14 -11   27.59    2.41   0
  -5   9 -16   47.50    2.22   0
  -5  11 -17   85.95    2.73   0
  -5  15 -15    6.80    2.24   0
  -5  17 -12  209.70    2.90   0
  -4  14 -19  142.05    2.70   0
  -4  16 -17    3.02    2.18   0
  -3   9 -21    8.36    1.83   0
  -3  15 -20   30.96    2.13   0
  -3  17 -18    7.36    1.96   0
  -2  14 -22   52.91    2.45   0
  -1   9 -23    1.42    1.87   0
  -1  15 -22    9.03    2.02   0
  -1  17 -20    9.35    1.94   0
  -6  12 -12    0.18    2.20   0
  -5  17 -11    8.24    2.25   0
  -4  10 -19    7.48    2.36   0
  -4  12 -19  116.25    2.91   0
  -3  11 -21    4.52    1.98   0
  -2  10 -22   11.78    2.13   0
  -2  16 -20    2.95    1.97   0
  -6  10 -11   72.64    2.40   0
  -6  12 -11   -1.36    2.21   0
  -5   9 -15    0.84    1.85   0
  -5  11 -16    8.41    2.08   0
  -5  15 -14   17.05    2.17   0
  -4  14 -18    0.79    1.97   0
  -4  16 -16  132.55    2.77   0
  -3   9 -20   30.25    1.93   0
  -3  17 -17    2.56    1.80   0
  -2  12 -22   89.81    2.70   0
  -6  10 -10   -0.03    1.83   0
  -6  12 -10    3.31    2.57   0
  -6  14  -9   80.11    2.72   0
  -5  11 -15  123.21    2.82   0
  -5  13 -15   28.77    2.24   0
  -5  15 -13  127.22    2.80   0
  -5  17 -10   91.90    2.41   0
  -4  10 -18   18.80    2.17   0
  -4  12 -18   49.36    2.51   0
  -4  18 -12   56.76    2.20   0
  -3  13 -20   20.87    2.32   0
  -3  15 -19   14.24    2.16   0
  -1   9 -22   57.03    1.90   0
  -1  13 -22   10.02    2.14   0
  -1  15 -21  178.92    2.84   0
  -1  17 -19   85.62    2.13   0
  -5   9 -14  252.41    3.15   0
  -5  13 -14   -0.13    2.03   0
  -5  17  -9   49.12    2.42   0
  -4  16 -15   61.09    2.51   0
  -3  11 -20   16.20    2.22   0
  -2  10 -21    2.57    1.78   0
  -2  12 -21    7.56    2.12   0
  -2  16 -19   24.59    2.34   0
  -1  11 -22    2.01    1.90   0
  -6  12  -9   54.19    2.26   0
  -5  11 -14   39.28    2.20   0
  -5  15 -12  110.76    2.73   0
  -4  10 -17  336.64    3.79   0
  -4  12 -17    5.30    2.13   0
  -4  18 -11   -2.90    1.68   0
  -3  13 -19    4.95    2.22   0
  -3  15 -18   11.03    1.82   0
  -2  18 -16    4.37    1.61   0
  -5  13 -13  100.78    2.90   0
  -5  17  -8   20.86    2.02   0
  -4  16 -14   93.42    2.74   0
  -3  11 -19  117.27    2.79   0
  -2  16 -18    8.23    2.25   0
  -1  13 -21  247.70    3.30   0
  -1  17 -18   -2.49    2.01   0
  -5  11 -13   36.77    2.04   0
  -5  15 -11  100.29    2.71   0
  -5  17  -7    0.27    1.93   0
  -4  10 -16    7.34    2.03   0
  -4  12 -16    2.21    2.18   0
  -4  18 -10   10.01    1.81   0
  -3  13 -18   17.93    2.18   0
  -3  15 -17    1.58    1.79   0
  -3  17 -15   15.52    2.13   0
  -2  10 -20    0.04    1.76   0
  -2  12 -20   74.63    2.42   0
  -2  18 -15   49.59    2.04   0
  -1  11 -21    5.40    1.80   0
  -5  11 -12  226.18    3.49   0
  -5  17  -6    5.02    1.89   0
  -4  14 -15  191.35    3.23   0
  -4  16 -13    7.62    2.48   0
  -4  18  -9   34.19    2.12   0
  -3  11 -18    3.65    2.03   0
  -2  14 -19  174.48    3.24   0
  -5  17  -5  250.94    3.20   0
  -4  10 -15  118.12    2.57   0
  -4  12 -15   18.63    2.22   0
  -3  17 -14    2.45    2.19   0
  -2  10 -19    8.20    1.69   0
  -2  12 -19   34.01    1.95   0
  -2  16 -17    0.50    2.07   0
  -1  11 -20    3.63    1.91   0
  -1  13 -20   19.09    2.04   0
  -1  17 -17    4.45    1.83   0
   0  18 -16   34.77    1.88   0
  -5  11 -11  163.99    2.88   0
  -5  15  -9   -2.40    2.11   0
  -5  17  -4   35.40    2.31   0
  -4  14 -14    9.33    2.27   0
  -4  16 -12    3.09    2.16   0
  -4  18  -8    7.07    1.75   0
  -3  11 -17    5.98    2.03   0
  -3  13 -17    6.88    2.10   0
  -2  14 -18   29.48    2.19   0
   0  16 -18   50.11    2.10   0
  -5  13 -10   45.66    2.39   0
  -4  12 -14   64.80    2.50   0
  -4  14 -13    9.66    2.26   0
  -4  16 -11   26.16    2.36   0
  -3  17 -13    5.91    2.44   0
  -3  19  -9    2.08    1.78   0
  -2  16 -16   72.74    2.52   0
  -1  13 -19   32.57    2.23   0
  -1  17 -16   33.50    2.12   0
  -1  19 -13   83.50    2.16   0
  -5  11 -10  240.04    3.19   0
  -5  13  -9   40.03    2.38   0
  -3  13 -16    2.77    2.06   0
  -3  19  -8   24.17    1.85   0
  -2  12 -18   15.21    1.87   0
  -2  14 -17  131.42    2.74   0
  -2  18 -13    0.41    1.98   0
  -1  11 -19   61.89    2.20   0
   0  18 -15   39.42    1.87   0
  -5  11  -9   35.79    1.95   0
  -4  12 -13   -2.72    1.92   0
  -4  14 -12   93.46    2.68   0
  -4  16 -10   68.85    2.69   0
  -4  18  -6    3.71    1.84   0
  -3  11 -16  119.05    2.66   0
  -3  15 -14   48.97    2.46   0
  -3  17 -12   68.08    2.28   0
  -1  19 -12   -0.47    1.70   0
   0  16 -17  109.78    2.49   0
  -5  13  -8    0.98    1.97   0
  -4  18  -5   12.65    2.10   0
  -3  13 -15   65.74    2.52   0
  -3  19  -7   51.09    2.00   0
  -2  12 -17    8.44    1.83   0
  -2  18 -12   92.72    2.48   0
  -1  13 -18   -1.45    2.02   0
  -1  15 -17   13.04    2.36   0
  -1  17 -15  146.52    2.78   0
   0  14 -18    9.91    2.12   0
   0  18 -14   46.01    2.03   0
  -5  11  -8    8.55    2.00   0
  -5  13  -7   29.34    2.22   0
  -4  12 -12   84.79    2.40   0
  -4  14 -11   45.10    2.31   0
  -4  16  -9    1.36    2.06   0
  -4  18  -4    0.44    1.98   0
  -3  11 -15   35.68    2.08   0
  -3  19  -6   38.73    1.99   0
  -2  14 -16   17.38    2.11   0
  -1  11 -18  130.02    2.45   0
  -1  19 -11    6.83    1.72   0
  -5  11  -7   67.74    2.33   0
  -4  16  -8  143.40    2.94   0
  -4  18  -3   79.17    2.42   0
  -3  13 -14   34.69    2.35   0
  -3  17 -10   96.93    2.34   0
  -2  18 -11   17.28    2.08   0
  -1  15 -16    8.02    2.18   0
  -1  17 -14   45.67    2.39   0
   0  12 -18    9.98    2.01   0
   0  16 -16    6.83    1.78   0
  -5  13  -6   12.52    2.05   0
  -4  12 -11   84.61    2.37   0
  -4  14 -10   -2.71    1.98   0
  -4  18  -2    9.43    2.02   0
  -3  19  -5   -0.45    1.74   0
  -2  12 -16    9.65    1.82   0
  -2  14 -15   49.02    2.31   0
  -1  19 -10   24.90    1.91   0
   0  14 -17   67.29    2.28   0
   0  18 -13   67.84    2.23   0
  -5  13  -5  259.15    3.45   0
  -4  14  -9   26.53    2.00   0
  -4  18  -1    1.94    1.83   0
  -3  13 -13   73.30    2.51   0
  -3  19  -4  121.32    2.21   0
  -2  18 -10    3.77    2.10   0
  -1  17 -13  150.34    2.80   0
   1  19 -11   14.36    1.58   0
  -5  13  -4    6.47    2.07   0
  -4  12 -10   91.06    2.41   0
  -4  18   0    8.57    1.82   0
  -3  15 -11   99.47    2.72   0
  -3  17  -8    5.03    2.14   0
  -3  19  -3   58.45    2.03   0
  -2  12 -15    7.23    1.82   0
  -2  14 -14   32.27    2.21   0
  -2  18  -9   94.35    2.56   0
  -1  19  -9   50.04    2.12   0
   0  12 -17    3.58    1.57   0
   0  18 -12   90.36    2.21   0
  -4  12  -9   20.67    1.83   0
  -4  18   1   36.08    2.06   0
  -3  13 -12  165.41    2.95   0
  -3  19  -2    1.42    1.73   0
  -1  17 -12   76.66    2.46   0
   0  14 -16   15.13    1.86   0
   1  19 -10    7.22    1.61   0
  -3  15 -10    6.65    2.30   0
  -3  19  -1   -0.11    1.81   0
  -2  12 -14  207.18    2.88   0
  -2  14 -13   -2.38    2.03   0
  -1  15 -14    2.12    1.85   0
  -1  19  -8   21.78    1.97   0
   0  18 -11  158.83    2.97   0
   1  17 -13   19.16    1.92   0
  -4  12  -8  192.85    2.88   0
  -4  14  -7   28.63    2.27   0
  -3  13 -11    8.55    2.01   0
  -3  19   0   26.79    1.92   0
  -2  16 -11    8.23    2.13   0
  -1  13 -15   28.34    1.97   0
   0  12 -16   93.16    2.33   0
   1  19  -9   17.50    2.00   0
  -4  14  -6   25.66    2.14   0
  -3  17  -6    4.39    1.84   0
  -3  19   1   93.43    2.28   0
  -2  18  -7   76.68    2.19   0
  -1  15 -13    4.41    1.81   0
  -1  19  -7   12.54    2.01   0
   0  14 -15    5.21    1.89   0
   0  16 -13   74.52    2.58   0
  -3  13 -10   45.75    2.32   0
  -3  17  -5  151.23    2.94   0
  -3  19   2    2.50    1.92   0
  -3  19   3   -4.83    2.01   0
  -2  14 -12    2.86    2.06   0
  -2  18  -6    2.92    1.78   0
  -1  13 -14   98.46    2.25   0
  -1  19  -6   31.51    2.48   0
   0  20  -5   10.43    1.61   0
   1  17 -12   62.04    2.16   0
  -4  14  -5   97.63    2.48   0
  -3  17  -4  118.26    2.76   0
  -3  19   4   40.54    2.08   0
  -3  19   5  167.95    2.79   0
  -2  16  -9    1.99    2.22   0
  -1  15 -12   34.35    2.06   0
   0  14 -14    0.35    1.82   0
   1  19  -8    9.71    1.77   0
  -4  14  -4   -1.14    2.09   0
  -3  13  -9   13.21    1.81   0
  -2  14 -11   27.05    2.19   0
  -2  18  -5   -5.57    1.89   0
  -1  19  -5    7.50    2.18   0
   0  16 -12   18.16    2.23   0
   0  18  -9   36.14    2.10   0
   0  20  -4   21.13    1.65   0
   1  17 -11   89.01    2.27   0
  -4  14  -3  173.11    2.97   0
  -2  16  -8  147.09    3.03   0
  -1  13 -13   78.24    2.20   0
   1  15 -13   44.29    2.09   0
   1  19  -7    9.54    1.81   0
  -3  13  -8  128.63    2.55   0
  -3  15  -6   14.47    2.03   0
  -2  14 -10   29.55    2.16   0
  -1  19  -4   31.27    2.23   0
   0  16 -11    1.57    2.22   0
   1  17 -10   27.00    2.39   0
  -4  14  -2   26.79    2.02   0
  -3  15  -5   28.09    2.08   0
  -2  16  -7   20.97    2.40   0
  -2  18  -3    0.66    1.92   0
  -1  13 -12  144.19    2.55   0
  -1  19  -3    1.70    2.16   0
   0  20  -2    4.11    1.71   0
   2  18  -8   -1.31    1.78   0
  -4  14  -1   83.73    2.36   0
  -3  13  -7    4.34    1.72   0
  -2  14  -9  126.82    2.71   0
  -2  18  -2    6.65    2.14   0
  -1  15 -10  222.74    3.19   0
  -1  19  -2    7.14    2.12   0
   0  14 -12    2.97    1.67   0
   0  18  -7   48.28    2.29   0
   0  20  -1   22.29    1.94   0
   1  15 -12  125.41    2.56   0
  -4  14   0   55.06    2.35   0
  -3  13  -6   23.83    1.94   0
  -3  15  -4  276.58    3.39   0
  -2  16  -6   70.31    2.55   0
  -2  18  -1   15.38    2.27   0
   0  18  -6   -0.05    2.14   0
   0  20   0    1.87    1.82   0
   2  18  -7  138.78    2.73   0
  -4  14   1  122.06    2.81   0
  -3  15  -3  222.59    3.06   0
  -3  17   2  258.80    3.37   0
  -2  14  -8    3.38    1.93   0
  -2  16  -5   12.42    2.14   0
  -2  18   0  102.21    3.04   0
  -1  15  -9    0.82    2.09   0
  -1  17  -6    6.47    2.27   0
  -1  19  -1    4.32    2.15   0
   0  20   1   20.84    1.88   0
   1  15 -11  136.37    2.52   0
   1  19  -4    3.68    1.96   0
  -3  13  -5  154.62    2.63   0
  -3  17   3   80.91    2.59   0
  -1  19   0    0.08    2.05   0
   0  14 -11  341.40    3.45   0
   0  18  -5   68.68    2.17   0
  -5  13   2  101.26    2.26   0
  -4  16  11   42.55    1.91   0
  -4  16  12    2.48    1.75   0
  -3  15   6   14.06    1.94   0
  -2  16  22   52.91    1.68   0
  -1  15   8    5.87    1.77   0
  -5  13   3    3.21    1.67   0
  -4  14   4   20.83    2.08   0
  -4  16  13   16.84    1.82   0
  -4  16  14    2.01    2.04   0
  -3  15   7   14.10    2.00   0
  -2  14   4   15.86    1.75   0
  -2  16  20   62.24    2.37   0
  -2  16  21   34.14    1.68   0
  -1  15   9  273.05    3.08   0
   0  14   8  160.77    2.46   0
  -6  14   9  188.77    2.66   0
  -5  15  10   29.45    2.06   0
  -4  16  15   52.69    2.42   0
  -4  16  16    8.40    1.94   0
  -4  16  17    2.46    1.92   0
  -4  16  18   22.51    1.89   0
  -4  16  19    3.68    1.71   0
  -3  15   8   50.64    2.16   0
  -2  14   5   13.43    1.64   0
  -2  16  15   45.86    2.14   0
  -2  16  16   12.17    1.93   0
  -2  16  17   23.19    2.01   0
  -2  16  18    7.93    1.74   0
  -1  15  10   66.27    2.08   0
  -1  15  11  137.33    2.50   0
   0  14   9  247.81    2.88   0
  -6  14  10  185.53    2.79   0
  -5  13   4    9.45    1.74   0
  -5  15  11   56.56    2.09   0
  -4  14   5    1.57    1.79   0
  -1  15  12  126.37    2.54   0
   0  14  10   41.78    1.89   0
   0  14  11  339.31    3.20   0
  -7  13  11   39.78    1.93   0
  -7  13  12  185.00    2.78   0
  -6  14  11  207.71    2.83   0
  -5  15  12   10.27    1.77   0
  -4  14   6   63.23    2.23   0
  -3  15   9  102.37    2.41   0
  -3  15  10    0.70    1.92   0
  -2  14   6   15.82    1.72   0
  -1  15  13   45.21    2.21   0
  -7  13  13   36.99    2.33   0
  -6  12   5   19.76    1.75   0
  -6  14  12   51.11    2.29   0
  -5  13   5   46.57    2.00   0
  -5  15  14    4.56    1.96   0
  -5  15  15   22.00    2.00   0
  -5  15  16   62.16    2.61   0
  -5  15  21   57.09    1.80   0
  -4  14   7    4.80    1.84   0
  -3  15  11   40.62    2.15   0
  -2  14   7   51.21    1.96   0
  -1  15  15   35.56    2.15   0
  -1  15  16    6.10    2.24   0
  -1  15  19   30.75    2.05   0
  -7  13  14   31.01    2.06   0
  -6  14  13    3.35    2.04   0
  -5  13   6  136.66    2.50   0
  -5  15  17    1.28    1.91   0
  -5  15  18    1.07    1.88   0
  -5  15  19   10.90    1.77   0
  -5  15  20   22.07    1.82   0
  -4  14   8    4.26    1.82   0
  -3  13   4   86.67    1.99   0
  -3  15  24   95.67    1.96   0
  -2  14   8  126.49    2.40   0
  -7  13  15   28.13    2.05   0
  -7  13  16    3.08    2.00   0
  -7  13  17   14.13    1.84   0
  -7  13  18   22.33    2.03   0
  -7  13  19   13.74    2.00   0
  -6  12   6   61.56    2.09   0
  -6  14  15   24.26    2.09   0
  -6  14  16   15.08    2.05   0
  -6  14  17   91.12    2.62   0
  -6  14  20    5.28    1.96   0
  -6  14  21   38.88    1.69   0
  -3  13   5    6.25    1.55   0
  -3  15  13  149.08    2.73   0
  -3  15  14   80.26    2.44   0
  -3  15  23  111.52    2.09   0
  -2  14   9  172.77    2.61   0
  -6  12   7   25.73    2.12   0
  -6  14  18   38.46    2.00   0
  -6  14  19  116.68    2.31   0
  -5  13   7   48.63    2.14   0
  -3  15  17   23.33    2.01   0
  -3  15  18    2.21    1.99   0
  -3  15  19   -2.84    2.31   0
  -3  15  20   26.94    2.15   0
  -3  15  21   46.59    2.16   0
  -3  15  22    7.44    1.87   0
  -2  14  10   -1.27    1.66   0
  -3  13   6    8.46    1.59   0
  -2  14  11  475.25    3.79   0
  -6  12   8    1.90    1.71   0
  -5  13   9   84.63    2.13   0
  -4  14  11  336.78    3.45   0
  -4  14  12   -1.46    2.01   0
  -3  13   7  155.05    2.47   0
  -2  14  12    8.91    1.77   0
  -2  14  26   38.30    1.76   0
  -6  12   9   21.29    1.88   0
  -4  14  13    1.47    2.05   0
  -4  14  25   54.03    1.89   0
  -2  14  13    7.87    1.96   0
  -2  14  24   27.19    2.15   0
  -2  14  25  143.22    2.29   0
  -6  12  10  195.45    2.87   0
  -5  13  11   12.04    1.86   0
  -4  12   6    1.80    1.52   0
  -4  14  14   22.91    2.21   0
  -4  14  24   53.88    2.00   0
  -3  13   8    4.54    1.74   0
  -2  14  14   44.27    1.92   0
  -2  14  15    1.92    1.87   0
  -1  13  11   37.71    1.86   0
  -6  12  11    0.43    2.40   0
  -5  13  12  109.98    2.46   0
  -4  14  19  106.79    2.38   0
  -4  14  20   -2.00    1.66   0
  -4  14  22   23.88    2.14   0
  -3  13   9  272.50    3.07   0
  -2  14  17   47.93    2.37   0
  -2  14  18   16.03    2.22   0
  -2  14  19  122.47    2.76   0
  -2  14  22   71.16    2.18   0
  -1  13  12   56.19    1.86   0
  -6  12  12   52.80    2.38   0
  -5  13  13  206.46    3.02   0
  -5  13  26    7.46    1.61   0
  -4  12   7  150.12    2.54   0
  -3  13  10   33.80    2.01   0
  -1  13  13  280.01    2.96   0
  -6  12  13   82.87    2.50   0
  -5  13  14    4.22    1.99   0
  -5  13  24   40.08    1.90   0
  -5  13  25   15.52    1.71   0
  -4  12   8   31.28    1.78   0
  -3  13  11   88.22    2.35   0
  -3  13  28   12.00    1.63   0
  -1  13  14  209.19    2.76   0
  -1  13  15   93.43    2.24   0
  -7  11  15  120.68    2.33   0
  -6  12  14   44.73    2.35   0
  -6  12  25    3.73    1.60   0
  -5  11   7    4.47    1.63   0
  -5  13  16   24.54    2.22   0
  -5  13  19   14.94    2.20   0
  -5  13  22  103.82    2.61   0
  -3  13  12    0.11    1.91   0
  -3  13  27   33.26    1.79   0
  -1  13  16   82.24    2.19   0
  -1  13  17   -0.74    1.89   0
  -1  13  18   10.43    1.85   0
  -1  13  19    3.15    1.87   0
  -1  13  20  150.81    2.57   0
  -1  13  21  201.63    2.97   0
  -7  11  16   12.22    1.91   0
  -7  11  17   70.26    2.40   0
  -7  11  22   24.60    2.17   0
  -7  11  23   51.04    1.86   0
  -7  11  24   70.52    1.94   0
  -6  12  23   78.78    2.55   0
  -4  12   9   55.55    1.98   0
  -3  13  13  186.49    2.89   0
  -3  13  14   13.90    2.01   0
  -3  13  26   21.25    1.81   0
  -7  11  18   41.34    2.07   0
  -7  11  19   70.21    2.23   0
  -7  11  20   88.27    2.30   0
  -7  11  21    1.01    1.89   0
  -6  10   8    8.11    1.54   0
  -6  12  18    5.38    2.01   0
  -6  12  19    5.13    2.00   0
  -6  12  20  123.51    2.65   0
  -6  12  21    1.09    2.27   0
  -6  12  22   56.67    2.35   0
  -5  11   8    9.43    1.60   0
  -4  12  10  145.04    2.49   0
  -3  13  15  133.39    2.70   0
  -3  13  24   14.33    1.99   0
  -3  13  25   18.86    1.98   0
  -5  11   9    6.39    1.65   0
  -4  12  11   22.94    1.84   0
  -4  12  29   53.29    1.78   0
  -3  13  19   36.78    2.14   0
  -3  13  20  163.51    2.75   0
  -3  13  23   79.46    2.43   0
  -6  10   9   28.61    1.83   0
  -4  12  12    0.71    1.79   0
  -4  12  28    8.03    1.76   0
  -2  12  28   27.66    1.74   0
  -6  10  10   -1.27    1.60   0
  -4  12  13    9.56    1.98   0
  -2  12  27   44.80    1.97   0
  -6  10  11    4.82    1.75   0
  -5  11  29   11.71    1.67   0
  -4  12  14   17.63    2.01   0
  -4  12  15    5.99    2.04   0
  -4  12  25   11.70    1.99   0
  -4  12  26   15.10    2.11   0
  -3  11  31   77.10    2.11   0
  -2  12  14   51.41    1.90   0
  -2  12  26    4.35    1.72   0
  -6  10  12    3.56    2.06   0
  -6  10  29  161.63    2.20   0
  -5  11  12   94.94    2.18   0
  -5  11  13    6.51    1.70   0
  -5  11  28   -0.12    1.57   0
  -4  12  16   -0.67    1.98   0
  -4  12  17   22.93    2.19   0
  -4  12  18   58.32    2.36   0
  -4  12  23   40.80    2.04   0
  -4  12  24  146.30    2.42   0
  -2  12  16   54.71    1.88   0
  -2  12  17   22.21    1.86   0
  -2  12  23  237.79    3.39   0
  -2  12  24   91.80    2.67   0
  -7   9  27    3.54    1.63   0
  -6  10  13  238.44    3.03   0
  -6  10  28    5.78    1.68   0
  -5  11  14   58.67    2.10   0
  -5  11  27   21.35    1.93   0
  -4  12  19    4.77    2.11   0
  -4  12  20  357.36    3.70   0
  -4  12  21   -2.42    2.09   0
  -3  11  30    3.80    1.68   0
  -2  12  18  149.67    2.67   0
  -2  12  19   32.07    2.11   0
  -2  12  20  150.28    2.66   0
  -2  12  21    9.92    1.98   0
  -2  12  22   33.94    2.30   0
  -7   9  15   42.94    2.05   0
  -7   9  26    1.66    1.61   0
  -6  10  14   49.51    2.10   0
  -6  10  27   27.57    1.90   0
  -5  11  15   79.34    2.40   0
  -5  11  16   42.30    2.13   0
  -5  11  25  138.70    2.38   0
  -5  11  26   26.12    2.19   0
  -4  10  32   40.08    1.95   0
  -3  11  29   37.50    1.84   0
  -7   9  16  166.55    2.60   0
  -7   9  17   41.88    2.26   0
  -7   9  25    1.01    1.74   0
  -6  10  15   49.41    2.26   0
  -6  10  26    4.54    1.95   0
  -5  11  17  110.22    2.56   0
  -5  11  18  299.72    3.43   0
  -5  11  19   27.82    2.19   0
  -5  11  24  153.03    2.59   0
  -4   0  38   11.55    1.66   0
  -3  -5  38   23.91    1.94   0
  -3  -1  38  116.11    2.42   0
  -1  -7  34    4.91    2.27   0
  -1   1  34    2.26    2.30   0
   0  -8  30   10.34    2.12   0
   0  -6  32    3.33    2.34   0
   0  -4  33   12.79    2.27   0
   0  -2  33  107.88    2.80   0
   0   0  32    1.99    2.32   0
  -5  -1  38   56.34    2.63   0
  -4  -8  36    9.07    1.85   0
  -3  -3  38   45.77    2.30   0
  -2   0  36  189.44    3.15   0
  -1  -9  31   18.54    2.19   0
  -1  -5  35    0.51    2.12   0
  -1  -1  35   -0.51    2.51   0
  -4  -4  38   53.38    2.11   0
  -4  -2  38   21.93    2.03   0
  -3  -9  34    3.30    1.72   0
  -3  -7  36   23.85    1.93   0
  -2   2  34   23.32    2.22   0
  -1  -7  33    1.65    2.28   0
  -1  -3  35   23.13    2.25   0
  -1   1  33    8.81    2.18   0
   0  -8  29   15.45    1.98   0
   0  -6  31    3.91    2.42   0
  -5  -3  38   -0.64    2.30   0
  -4  -6  37  219.97    2.59   0
  -4   0  37    1.80    2.01   0
  -3  -5  37   84.61    2.47   0
  -2  -4  36   74.82    2.65   0
  -2  -2  36   29.94    2.48   0
  -1  -5  34   19.74    2.23   0
  -1  -1  34    1.06    2.51   0
  -2  -8  33    0.19    2.59   0
  -2  -6  35  283.36    3.53   0
  -2   0  35    1.89    2.35   0
  -1  -7  32    8.78    2.42   0
  -1  -3  34   19.33    2.36   0
  -1   1  32  497.84    4.52   0
   0  -6  30    1.96    2.42   0
  -5  -9  34    2.00    1.52   0
  -5  -7  36   28.36    1.85   0
  -5  -5  37   17.67    1.84   0
  -5  -1  37    5.84    1.94   0
  -4  -8  35    4.10    1.88   0
  -4  -4  37   58.56    2.42   0
  -3  -9  33   22.18    2.08   0
  -3  -7  35    6.28    2.09   0
  -3   1  35    0.12    2.24   0
  -1  -1  33    6.53    2.65   0
  -6   0  36   30.94    2.00   0
  -4  -6  36    9.11    1.87   0
  -4   0  36  183.06    2.78   0
  -3  -1  36  110.38    2.95   0
  -2  -6  34    2.62    2.34   0
  -2  -4  35   21.74    2.30   0
  -2   0  34  474.33    4.54   0
  -1  -7  31  119.50    3.02   0
  -1  -3  33   27.18    2.47   0
  -3  -3  36   11.98    2.64   0
  -2  -8  32    6.77    2.27   0
  -1  -5  32   86.42    2.70   0
  -1  -1  32  502.62    4.63   0
  -5  -9  33   29.75    1.81   0
  -5  -7  35   76.00    2.19   0
  -4  -8  34   13.22    2.00   0
  -3  -1  35    0.48    2.42   0
  -2  -6  33   49.05    3.14   0
  -2  -4  34   63.66    2.76   0
  -2   0  33   -0.62    2.90   0
  -1  -3  32   13.18    2.51   0
  -6  -4  36   48.98    2.36   0
  -6  -2  36    9.52    2.26   0
  -5  -5  36    6.15    2.05   0
  -4 -10  31    6.77    1.72   0
  -4  -6  35  129.89    2.75   0
  -4  -4  36   59.45    2.48   0
  -3  -3  35    5.65    2.16   0
  -2  -8  31   11.88    2.49   0
  -1  -5  31  112.02    2.79   0
  -6  -6  35   22.80    1.88   0
  -6   0  35    2.03    1.83   0
  -5  -3  36    0.38    1.93   0
  -3  -9  31   11.87    2.16   0
  -3  -7  33   41.75    3.29   0
  -3   1  33   16.02    3.01   0
  -2  -2  33   13.55    2.37   0
  -1  -7  29   54.86    2.47   0
  -6  -8  33   13.13    1.69   0
  -5  -9  32   -1.06    2.08   0
  -3  -1  34  160.78    3.22   0
  -2  -8  30   32.13    2.50   0
  -2  -6  32    1.34    2.60   0
  -2   0  32    6.84    2.36   0
  -7  -1  34   37.06    2.64   0
  -6  -4  35    8.10    1.92   0
  -5  -5  35   85.54    2.41   0
  -5  -1  35    8.13    1.90   0
  -4   0  34  228.58    3.53   0
  -3  -3  34   26.35    2.42   0
  -7  -5  34   29.13    2.26   0
  -6 -10  30   -1.00    1.40   0
  -6  -6  34   14.12    1.99   0
  -6   0  34   88.23    2.36   0
  -3  -7  32    1.23    2.34   0
  -3  -5  33  232.98    3.53   0
  -3  -1  33   12.15    2.75   0
  -3   1  32  471.63    4.59   0
  -2  -8  29   23.70    2.36   0
  -2  -6  31   62.12    3.04   0
  -2  -4  32  106.80    3.00   0
  -2  -2  32   11.02    2.29   0
  -7  -3  34   57.36    2.69   0
  -4  -4  34   96.96    2.69   0
  -4  -2  34    5.22    2.36   0
  -3  -3  33    3.88    2.33   0
  -6  -8  32   18.38    2.09   0
  -5  -5  34    0.10    2.06   0
  -4   0  33    1.36    2.30   0
  -3  -9  29    0.85    2.20   0
  -3   1  31   23.47    2.47   0
  -2  -6  30   -0.04    2.38   0
  -7  -7  32    6.06    1.93   0
  -7  -5  33    0.79    2.02   0
  -7  -1  33   77.46    2.44   0
  -6 -10  29  157.02    2.32   0
  -6  -6  33    6.53    2.27   0
  -6  -4  34   18.32    2.03   0
  -6  -2  34   -1.75    2.06   0
  -6   0  33   -1.16    2.54   0
  -4  -8  31   41.05    2.48   0
  -3  -5  32   15.88    2.47   0
  -3  -1  32  484.87    4.78   0
  -8  -2  32   30.31    2.41   0
  -5  -9  30   31.97    2.09   0
  -5  -7  32   11.70    2.36   0
  -5   1  32  276.24    3.80   0
  -4  -4  33    5.81    2.37   0
  -4  -2  33    0.98    2.60   0
  -3  -9  28  108.69    2.94   0
  -3  -3  32    1.69    2.34   0
  -2  -6  29  125.01    3.01   0
  -8   0  31    1.33    2.05   0
  -7  -3  33   98.13    2.55   0
  -6  -8  31    3.20    2.07   0
  -5  -1  33   63.86    2.95   0
  -4  -8  30    2.85    2.42   0
  -4   0  32  150.32    3.24   0
  -3  -7  30   25.71    2.72   0
  -3  -1  31   20.83    2.47   0
  -7  -9  29    2.21    1.76   0
  -7  -7  31   19.11    2.16   0
  -6 -10  28    3.64    1.82   0
  -6  -6  32   -1.74    2.52   0
  -6  -4  33   17.87    2.36   0
  -6  -2  33    4.01    2.18   0
  -5  -3  33   51.97    2.83   0
  -4  -2  32   41.80    2.96   0
  -3  -9  27    7.71    2.23   0
  -3  -3  31   24.38    2.55   0
  -7  -5  32   35.63    2.28   0
  -7  -1  32  119.86    2.70   0
  -5  -5  32   56.82    2.55   0
  -5  -1  32  279.71    4.21   0
  -4  -6  31    2.49    2.58   0
  -4   0  31    2.12    2.34   0
  -3  -7  29   31.72    2.81   0
  -3  -5  30   40.72    2.63   0
  -8  -6  30   11.20    2.36   0
  -8  -4  31   20.04    2.48   0
  -8  -2  31   66.63    2.55   0
  -7  -3  32    7.29    2.16   0
  -6  -8  30    8.89    2.15   0
  -5  -3  32   46.83    2.86   0
  -4  -8  29   -0.81    2.47   0
  -3  -3  30   81.11    2.93   0
  -8  -8  28   10.49    1.98   0
  -8   0  30  159.66    2.55   0
  -7  -9  28   -1.14    1.89   0
  -7  -7  30    5.85    2.08   0
  -6 -10  27   30.57    2.06   0
  -6  -6  31   16.40    2.38   0
  -4  -6  30   43.48    2.65   0
  -4  -4  31   16.34    2.58   0
  -4  -2  31   29.51    3.04   0
  -3  -7  28   45.41    2.79   0
  -7  -5  31   46.85    2.28   0
  -7  -1  31    8.29    2.42   0
  -6   0  31   -1.34    2.54   0
  -5  -7  30    1.07    2.43   0
  -5  -1  31    2.61    2.66   0
  -5   1  30   -1.33    2.48   0
  -4  -8  28   92.11    3.04   0
  -4   0  30  423.64    4.46   0
  -3  -5  29   22.05    2.52   0
  -8  -4  30   19.84    2.15   0
  -8  -2  30   13.13    2.59   0
  -7  -3  31    1.55    2.42   0
  -5  -3  31   16.86    2.44   0
  -4  -4  30   21.92    2.66   0
  -3  -7  27    8.58    2.47   0
  -9  -5  28    2.67    2.39   0
  -9  -1  28   21.72    2.77   0
  -8  -6  29  205.27    2.81   0
  -8   0  29   -2.34    2.23   0
  -7  -9  27    1.23    2.16   0
  -7  -7  29   44.52    2.27   0
  -6  -2  31  180.21    3.76   0
  -6   0  30  202.51    3.89   0
  -5  -9  27   24.55    2.59   0
  -5  -7  29  106.69    3.05   0
  -4  -6  29   27.07    2.51   0
  -8 -10  24    0.25    1.58   0
  -8  -8  27   17.92    2.04   0
  -5  -5  30   79.13    2.79   0
  -5  -1  30    1.12    2.84   0
  -4  -8  27    1.68    2.41   0
  -9  -7  26   38.33    1.93   0
  -9  -3  28    4.28    2.57   0
  -8  -4  29   21.65    2.60   0
  -6  -2  30    6.68    2.53   0
  -5  -9  26   26.04    2.58   0
  -5  -3  30   61.13    2.99   0
  -4  -6  28    9.44    2.54   0
  -4  -4  29    7.97    2.50   0
  -4  -2  29   77.49    3.23   0
  -9  -5  27  101.28    2.94   0
  -8  -6  28    0.65    2.23   0
  -8  -2  29   29.48    2.44   0
  -7  -9  26    3.31    2.21   0
  -7  -7  28   -2.80    2.59   0
  -6  -6  29   23.86    2.83   0
  -6   0  29   -1.83    2.66   0
  -5  -7  28   29.57    2.77   0
  -5  -5  29  138.42    3.35   0
  -5   1  28   55.64    2.89   0
  -4  -8  26   71.51    2.93   0
  -9  -1  27    5.60    2.30   0
  -8 -10  23    5.18    2.00   0
  -8  -8  26    2.53    2.21   0
  -8   0  28  235.02    3.17   0
  -7  -1  29   15.43    2.55   0
  -7   1  28    3.91    1.95   0
  -6  -8  27   49.17    2.80   0
  -5  -3  29   44.01    2.91   0
  -5  -1  29   17.99    2.90   0
  -9  -7  25  109.42    2.75   0
  -9  -3  27   32.56    2.65   0
  -8  -4  28   32.90    2.86   0
  -7  -9  25    2.56    2.53   0
  -6  -6  28   12.42    2.39   0
  -6  -4  29    0.99    2.70   0
  -5  -9  25   27.05    2.80   0
  -5  -7  27   17.60    2.88   0
  -4  -6  27  160.91    3.40   0
  -8  -6  27  323.92    3.52   0
  -8  -2  28    8.54    2.35   0
  -6  -8  26   21.10    2.81   0
  -6   0  28  142.67    3.40   0
  -5  -5  28    0.26    2.55   0
  -5  -1  28   57.08    3.08   0
  -9  -9  22   13.66    2.12   0
  -9  -5  26    0.19    2.20   0
  -9  -1  26   28.75    2.33   0
  -8 -10  22   22.05    2.07   0
  -8   0  27   -2.97    2.20   0
  -7  -1  28    4.94    2.70   0
  -6 -10  23    5.35    2.23   0
  -5  -9  24    3.52    2.45   0
  -5  -3  28   13.81    2.68   0
 -10  -4  24    9.15    2.62   0
 -10  -2  24   18.14    2.95   0
  -9  -7  24    8.90    2.58   0
  -9  -3  26   16.17    2.15   0
  -8  -4  27   94.30    3.07   0
  -7  -3  28    1.31    2.73   0
  -6  -6  27  389.89    4.43   0
  -6  -4  28  110.14    3.23   0
  -6  -2  28   -2.41    3.03   0
  -5  -7  26    7.89    2.79   0
  -5  -5  27   -0.61    2.54   0
 -10   0  23   -2.30    2.35   0
  -8 -10  21   76.13    2.61   0
  -8  -8  24    0.40    2.31   0
  -8  -6  26   10.50    2.61   0
  -7  -5  27   12.60    2.50   0
  -6  -8  25   39.93    2.91   0
  -6   0  27    1.49    2.76   0
  -5  -9  23   22.87    2.57   0
  -5  -3  27    0.56    2.63   0
  -9  -9  21    4.78    1.89   0
  -9  -5  25  205.09    3.13   0
  -7  -1  27    1.20    2.65   0
  -7   1  26  126.11    3.19   0
  -6  -6  26   10.77    3.31   0
  -6  -4  27   76.72    3.15   0
  -5  -7  25  144.36    3.48   0
 -10  -6  22    3.35    2.32   0
 -10  -4  23   10.83    2.77   0
 -10  -2  23    0.64    2.98   0
  -9  -7  23    3.42    2.30   0
  -9  -3  25    9.78    2.31   0
  -7  -7  25  142.74    3.64   0
  -6  -8  24    0.79    2.93   0
  -5  -5  26    3.88    2.53   0
 -10   0  22   43.07    2.55   0
  -9  -9  20    5.43    2.52   0
  -9  -5  24    9.17    2.43   0
  -8 -10  20   46.21    2.51   0
  -8  -8  23    9.16    2.70   0
  -7  -5  26   10.79    2.67   0
  -7  -1  26  126.23    4.14   0
  -6   0  26  271.02    4.19   0
  -5  -9  22   11.85    2.53   0
  -5  -7  24   13.17    2.68   0
 -10  -8  19    4.14    1.89   0
  -8   0  25   -1.25    2.68   0
  -7  -9  22    0.74    2.87   0
  -7  -3  26   39.80    2.82   0
  -7   1  25    5.14    2.74   0
  -6  -6  25  134.71    3.68   0
  -6  -4  26   37.90    2.99   0
  -6  -2  26   84.26    3.69   0
 -10  -6  21   38.20    2.25   0
 -10  -4  22   23.52    2.39   0
 -10  -2  22   -0.81    3.00   0
  -9  -7  22   14.93    2.50   0
  -9  -3  24   48.35    2.83   0
  -8 -10  19  148.11    3.22   0
  -8  -4  25    2.21    3.27   0
  -8  -2  25    4.45    3.03   0
  -7  -7  24    5.96    2.87   0
  -7  -5  25  320.98    4.35   0
  -6  -8  23   79.31    3.27   0
  -6   0  25    1.97    2.67   0
 -11  -3  19   22.38    3.10   0
 -10   0  21   -3.08    2.60   0
  -9  -9  19   76.41    2.57   0
  -9  -5  23    7.00    2.73   0
  -8   0  24   23.27    3.34   0
  -7  -9  21   43.57    3.17   0
  -6  -6  24    1.85    2.66   0
  -6  -4  25   -1.41    2.82   0
 -10  -8  18   79.82    2.61   0
 -10  -6  20    7.37    2.83   0
  -9  -7  21    0.31    2.96   0
  -7  -7  23   14.41    3.24   0
  -7  -3  25   86.18    3.35   0
  -6  -8  22   21.32    3.06   0
  -6  -2  25   29.28    3.01   0
 -10  -4  21   -2.95    2.56   0
 -10  -2  21   32.62    3.25   0
  -8 -10  18    6.38    2.51   0
  -8  -6  23   59.40    3.34   0
  -8  -2  24    9.13    3.15   0
  -7  -5  24   32.25    3.19   0
 -11  -3  18    2.56    3.64   0
 -11  -1  18  246.79    3.82   0
 -10  -8  17   30.62    2.95   0
 -10   0  20  239.26    4.01   0
  -9  -9  18    0.63    2.69   0
  -9  -5  22   60.87    3.23   0
  -8   0  23   -4.16    2.97   0
  -7  -9  20  115.50    3.53   0
  -7  -3  24   10.16    2.98   0
  -7  -1  24   89.23    3.59   0
  -7   1  23    8.95    2.91   0
  -6  -8  21    1.50    2.82   0
  -6  -6  23   49.45    3.07   0
  -6  -4  24   32.29    3.10   0
 -11  -5  17  161.32    3.27   0
 -10  -6  19  107.57    3.22   0
 -10  -4  20   25.65    3.09   0
  -9  -7  20   10.57    3.09   0
  -8  -8  20   10.20    3.19   0
  -8  -6  22   -0.42    2.71   0
  -8  -4  23  140.73    3.71   0
 -10  -2  20   40.22    2.87   0
  -9  -9  17   49.38    2.84   0
  -8  -2  23   96.62    3.64   0
  -7  -9  19   75.89    3.61   0
  -6  -6  22   10.06    2.76   0
 -11  -7  14   49.48    2.70   0
 -11  -5  16   29.14    3.04   0
 -11  -3  17    3.40    2.83   0
 -11  -1  17   12.99    2.82   0
 -10 -10  12    3.49    2.04   0
 -10  -8  16   25.81    3.00   0
 -10   0  19    0.16    3.02   0
  -8   0  22  174.59    4.31   0
  -7  -7  21   12.18    3.46   0
  -7  -3  23   46.50    3.37   0
  -7   1  22   56.25    3.25   0
  -6  -8  20    7.32    2.81   0
 -10  -6  18    6.12    2.49   0
 -10  -4  19   17.34    3.05   0
  -9  -9  16   23.25    2.73   0
  -9  -3  21   16.72    3.39   0
  -9  -1  21    5.39    3.10   0
  -8  -8  19   13.75    3.23   0
  -8  -6  21   20.70    2.77   0
  -8  -4  22   23.35    3.09   0
  -8  -2  22    9.17    3.37   0
  -7  -9  18   10.21    3.01   0
  -7  -5  22   15.05    3.03   0
 -11  -1  16   56.32    3.12   0
 -10 -10  11   33.75    2.10   0
 -10  -8  15    0.73    2.58   0
 -10  -2  19    2.62    2.68   0
  -9  -5  20    1.52    3.46   0
  -7  -3  22   10.36    3.01   0
  -7  -1  22   53.76    3.45   0
  -6  -8  19   68.07    3.40   0
 -11  -7  13   19.24    2.50   0
 -11  -5  15   81.91    2.93   0
 -11  -3  16   13.56    2.76   0
 -10  -6  17   60.66    2.88   0
 -10   0  18   30.03    2.81   0
  -9  -9  15    4.46    2.81   0
  -9  -1  20   10.04    3.04   0
  -8 -10  15  119.43    3.18   0
  -8  -8  18   94.85    3.58   0
  -8  -6  20    3.09    2.96   0
  -8  -4  21    3.09    3.01   0
  -8   0  21    2.91    3.16   0
  -7  -5  21   14.00    2.99   0
 -10 -10  10   12.05    2.13   0
 -10  -8  14   11.24    2.92   0
 -10  -4  18   37.94    3.13   0
  -9  -5  19   18.41    2.75   0
  -9  -3  20   -3.14    3.05   0
  -9   1  19   20.20    2.84   0
  -8  -2  21   24.16    3.38   0
  -7  -9  17   44.80    3.30   0
 -11  -7  12   25.50    2.57   0
 -11  -5  14   26.67    2.76   0
 -11  -3  15    3.32    2.40   0
 -11  -1  15    5.58    2.44   0
 -10  -6  16   57.50    2.98   0
  -8 -10  14    1.02    2.50   0
  -8  -8  17   32.09    3.18   0
  -8   0  20  159.80    3.86   0
  -7  -7  19    0.50    2.79   0
  -7  -3  21  226.15    4.33   0
 -10 -10   9    6.48    2.20   0
 -10  -4  17   32.65    2.99   0
  -9  -3  19   54.74    3.33   0
  -9  -1  19   19.96    3.11   0
  -9   1  18  146.59    3.72   0
  -8  -4  20  100.90    3.39   0
  -8  -2  20   10.19    3.12   0
  -7  -9  16  164.66    3.53   0
  -7  -5  20   41.74    2.94   0
 -11  -7  11   14.40    2.32   0
 -11  -1  14    5.11    2.90   0
 -10  -8  13   12.85    2.34   0
  -9  -5  18   80.73    3.16   0
  -7  -7  18    3.16    2.57   0
 -12  -2  10    1.24    2.89   0
 -11  -5  13   83.19    2.81   0
 -11  -3  14   92.21    2.80   0
 -10  -6  15   78.47    3.04   0
  -8  -4  19   13.57    2.70   0
  -8   0  19    3.23    2.74   0
  -7  -9  15   47.07    3.05   0
 -11  -7  10   10.56    2.38   0
 -10  -8  12   21.90    2.38   0
  -9  -5  17   82.82    3.03   0
  -9  -3  18   -0.49    2.61   0
  -9  -1  18  149.41    3.71   0
  -9   1  17    2.12    2.53   0
  -8  -2  19   52.73    3.39   0
  -7  -7  17   19.35    2.89   0
 -12  -2   9   20.69    2.53   0
 -11  -5  12    9.00    2.38   0
 -11  -3  13   81.42    2.66   0
 -11  -1  13   14.86    2.49   0
  -9  -7  15  303.93    4.11   0
  -7  -9  14   19.43    2.44   0
 -12   0   8   12.53    2.52   0
 -11  -7   9   24.17    2.29   0
 -10  -8  11   -0.84    2.27   0
 -10   0  15    0.10    2.71   0
  -9  -5  16   28.71    2.69   0
  -9  -3  17   14.72    2.70   0
  -9  -1  17   -0.83    2.86   0
  -8   0  18   69.34    3.01   0
 -12  -2   8    2.34    2.68   0
 -11  -5  11   52.43    2.48   0
 -11  -3  12   -1.84    2.33   0
 -11  -1  12    1.59    2.44   0
 -11   1  11   -2.51    2.44   0
 -10  -2  15   11.24    3.28   0
  -9  -9  11   20.42    2.86   0
  -9   1  16   74.47    2.87   0
  -8  -8  14   56.39    3.05   0
  -8  -6  16  103.52    3.45   0
  -8  -2  18   14.84    2.76   0
 -12   0   7    1.58    2.34   0
 -11  -7   8   50.26    2.38   0
 -10  -8  10   86.26    2.60   0
 -10  -4  14    8.72    2.82   0
 -10   0  14  166.72    3.53   0
  -9  -3  16    0.14    2.62   0
  -7  -9  13    3.83    2.10   0
 -12  -2   7    0.46    2.67   0
 -11  -5  10   46.91    2.64   0
 -11  -3  11   19.54    2.52   0
 -10  -2  14   50.72    2.74   0
  -9  -9  10   37.54    2.79   0
  -9  -7  13   23.79    2.70   0
  -9  -5  15  266.37    3.87   0
  -9  -1  16   75.27    3.20   0
  -8  -2  17   39.65    2.75   0
 -12   0   6   54.82    2.73   0
 -11  -7   7   11.31    2.23   0
 -11  -1  11    3.21    2.10   0
 -11   1  10   -0.20    2.11   0
 -10  -8   9   63.93    2.58   0
 -10  -4  13   98.58    2.87   0
  -8  -6  15   28.86    2.50   0
  -8  -4  16   -2.45    2.46   0
 -12  -2   6    4.45    2.49   0
 -11  -5   9   28.28    2.54   0
 -10  -6  11    1.83    2.75   0
 -10  -2  13   -0.40    3.00   0
 -10   0  13   -1.73    2.52   0
  -9  -9   9   53.50    2.69   0
  -9  -7  12   47.85    2.78   0
  -9  -5  14   13.98    2.81   0
  -9  -3  15    6.01    2.52   0
  -9  -1  15   11.45    2.74   0
 -12   0   5    1.39    2.48   0
 -11  -1  10    0.57    2.18   0
 -11   1   9   30.05    2.14   0
 -10  -4  12   25.90    2.46   0
  -9   1  14    6.79    2.15   0
 -12  -2   5   20.51    2.54   0
 -11  -5   8   12.84    2.34   0
 -10  -6  10   -1.38    2.93   0
 -10   0  12  127.69    3.13   0
  -9  -9   8   15.38    2.39   0
  -9  -7  11  108.92    3.08   0
  -9  -5  13   13.86    2.57   0
  -9  -3  14   34.25    2.72   0
 -12   0   4   25.13    2.48   0
 -11   1   8   28.48    2.19   0
 -10  -2  12   48.39    2.75   0
  -9   1  13   24.30    2.21   0
  -8  -8  11   52.52    2.46   0
  -8  -6  13  325.74    4.04   0
 -11  -5   7   26.28    2.52   0
 -10  -6   9   59.07    3.02   0
 -10  -4  11   90.72    2.86   0
 -10   0  11    2.95    2.88   0
  -9  -9   7   63.53    2.63   0
  -9  -5  12    3.42    2.40   0
 -10  -2  11  255.82    3.86   0
  -9  -1  13   25.75    2.93   0
 -10  -6   8   18.69    2.64   0
 -10  -4  10   73.51    2.75   0
  -9   1  12   13.43    2.18   0
 -10  -2  10    7.97    2.66   0
 -10   0  10   34.65    2.52   0
  -9  -5  11  106.09    2.96   0
  -9  -3  12   30.73    2.54   0
  -9  -1  12   10.65    2.59   0
  -8  -8   9   31.89    2.68   0
 -10  -6   7    7.48    2.58   0
 -10  -4   9   93.16    2.76   0
  -9   1  11   36.68    2.27   0
 -11  -5   4    2.72    2.13   0
 -10  -2   9  253.27    3.77   0
 -10   0   9   -2.40    2.56   0
  -9  -5  10  111.77    2.94   0
  -9  -3  11   14.47    2.52   0
  -8  -8   8  343.69    3.90   0
 -10  -6   6   13.36    2.83   0
 -10  -4   8   83.77    2.68   0
  -9  -1  11   36.52    2.69   0
 -10  -2   8  142.30    3.27   0
 -10   0   8    4.49    2.40   0
  -9  -5   9   68.72    2.56   0
  -9  -3  10   44.25    2.61   0
  -9   1  10   66.23    2.67   0
  -8  -8   7   -2.18    2.37   0
 -10  -6   5   10.67    2.55   0
 -10  -4   7   11.29    2.29   0
 -11  -1   4   -0.51    2.63   0
 -10  -2   7    5.10    2.44   0
 -10   0   7    0.88    2.42   0
  -9  -3   9   40.00    2.43   0
  -8  -8   6   37.21    2.46   0
 -10  -4   6   29.44    2.42   0
  -9  -7   5   23.69    2.59   0
 -10  -2   6    3.03    2.29   0
  -9  -5   7    7.13    2.42   0
 -11  -7  -6    6.84    2.55   0
  -9  -7   4   44.83    2.70   0
  -9  -3   8   22.07    2.38   0
 -11  -7  -7    3.38    2.07   0
 -10  -2   5   86.81    2.69   0
 -12   0  -8  123.58    3.12   0
 -11  -7  -9   51.16    2.12   0
 -11  -7  -8   47.38    2.15   0
  -9  -7   3   -0.26    2.38   0
 -12  -2 -10   48.92    2.96   0
 -12  -2  -9   -0.52    2.69   0
 -12   0  -9    2.71    2.59   0
 -11  -7 -12    0.68    1.92   0
 -11  -7 -11   54.36    2.27   0
 -11  -7 -10   26.21    2.00   0
 -10  -4   3    6.63    2.27   0
 -10  -2   4   67.87    2.58   0
  -9  -5   5   35.55    2.51   0
 -11  -5  -5  105.22    2.73   0
 -10  -4   2   36.51    2.52   0
 -10  -2   3  151.62    3.03   0
  -9  -5   4    1.39    2.12   0
 -11  -5  -6    3.56    2.29   0
 -11  -5  -7   19.15    2.27   0
 -10  -2   2    8.33    2.36   0
  -9  -7   0  267.03    3.51   0
  -9  -5   3   21.37    2.11   0
 -10  -8 -11    1.05    2.19   0
 -10  -8 -10  108.56    2.58   0
 -10   2   1  150.16    2.86   0
 -11  -5 -10   26.47    2.59   0
 -10  -8 -13    3.44    1.86   0
 -10  -8 -12    6.86    1.87   0
 -10  -6  -4   30.32    2.78   0
 -10   0   1    3.51    2.35   0
 -10   2   0   55.99    2.74   0
  -9  -5   2    1.82    1.95   0
 -11  -5 -16    0.82    2.05   0
 -11  -5 -12   40.76    2.59   0
 -11  -5 -11   81.56    2.51   0
  -9  -5   1   44.22    2.20   0
 -11  -5 -15   -0.07    2.30   0
 -11  -5 -14    5.75    2.24   0
 -11  -5 -13   73.68    2.71   0
 -10   0   0  159.91    3.30   0
 -10   2  -1   10.12    2.19   0
 -10  -2  -1    5.56    2.32   0
  -9  -5   0   11.77    2.09   0
 -11  -3 -10   11.47    2.78   0
 -11   1  -8   90.93    2.63   0
 -10   0  -1    3.40    2.42   0
 -10   2  -2    0.06    2.14   0
 -11  -3 -11    3.66    2.47   0
 -11   1  -9    0.99    2.03   0
 -11   3 -16    2.68    2.59   0
 -11   3 -14    4.43    2.32   0
 -11   3 -13    5.88    1.91   0
 -11   3 -12    0.20    1.78   0
 -10   0  -2   13.05    2.59   0
  -9  -7  -5    7.26    2.18   0
  -9  -5  -1    9.61    2.06   0
 -11  -3 -18  105.71    2.57   0
 -11  -3 -17    6.35    2.52   0
 -11  -3 -16    3.90    2.76   0
 -11  -3 -15   24.32    2.97   0
 -11  -3 -14    2.60    2.37   0
 -11  -3 -13    7.78    2.28   0
 -11  -3 -12    4.27    2.30   0
 -11  -1 -10   46.15    2.55   0
 -11   1 -10   38.87    2.40   0
 -11   3 -15   23.52    2.06   0
 -10   2  -3   70.09    2.60   0
  -9  -5  -2   10.96    2.17   0
 -11  -1 -11   15.71    2.60   0
 -11   1 -12  237.88    3.54   0
 -11   1 -11   19.05    2.35   0
 -10  -6 -10   16.28    2.56   0
 -10  -4  -6  182.42    3.16   0
 -10   0  -3    1.91    2.40   0
 -10   2  -4    2.64    2.34   0
  -9  -7  -6    5.11    2.07   0
 -11  -1 -19   16.93    2.35   0
 -11  -1 -14    4.52    2.55   0
 -11  -1 -13    5.56    2.20   0
 -11  -1 -12  245.03    3.29   0
 -11   1 -18    4.25    2.68   0
 -11   1 -14    2.88    2.43   0
 -11   1 -13    6.72    2.32   0
 -10  -6 -20    4.11    1.78   0
 -10  -6 -19    1.27    2.07   0
 -10  -6 -13   49.62    2.49   0
 -10   0  -4   18.00    2.47   0
  -9  -5  -3    2.67    2.11   0
 -11  -1 -18    6.31    2.50   0
 -11  -1 -17   22.22    2.56   0
 -11  -1 -16  113.34    2.91   0
 -11  -1 -15    1.43    2.28   0
 -11   1 -17   20.12    2.57   0
 -11   1 -16  110.92    2.79   0
 -11   1 -15   -5.46    2.33   0
 -10  -6 -18    8.48    2.18   0
 -10  -6 -17  111.82    2.74   0
 -10  -6 -16    4.47    2.42   0
 -10  -6 -15  241.93    3.41   0
 -10  -6 -14   39.89    2.31   0
 -10  -4  -7    3.63    2.20   0
 -10   2  -5   89.66    2.76   0
 -10  -4  -8   34.40    2.31   0
 -10  -2  -6  190.83    3.26   0
 -10   0  -5   -2.80    2.38   0
 -10   2  -6  187.53    3.31   0
  -9  -7  -9   50.17    2.47   0
  -9  -5  -4   22.54    2.24   0
 -10  -4 -10    1.15    2.45   0
 -10  -4  -9   14.69    2.09   0
 -10  -2  -7   30.62    2.43   0
 -10   0  -6   25.76    2.55   0
 -10   2  -7   31.81    2.77   0
  -9  -7 -10    3.75    2.27   0
  -9  -5  -5   29.74    2.39   0
 -10  -4 -11   53.87    2.64   0
 -10  -2  -8    1.21    2.62   0
 -10   0  -7   -0.55    2.49   0
  -9  -7 -12    2.21    2.29   0
  -9  -7 -11  133.83    3.01   0
  -9  -5  -6   16.97    2.50   0
 -10  -4 -23   18.51    1.64   0
 -10  -4 -22   39.13    2.34   0
 -10  -4 -12   26.61    2.89   0
 -10   2  -8    0.92    2.25   0
  -9  -7 -21   27.29    2.17   0
  -9  -7 -14    8.83    2.72   0
  -9  -7 -13  142.80    3.05   0
 -10  -4 -21   44.58    2.26   0
 -10  -4 -13    2.37    2.57   0
 -10  -2 -10  156.46    3.32   0
 -10  -2  -9    8.36    2.19   0
 -10   0  -8   82.28    2.88   0
 -10   2  -9    6.28    2.48   0
  -9  -7 -18    1.60    2.54   0
  -9  -7 -15   46.77    2.49   0
  -9  -5  -7   -0.48    2.26   0
 -10  -4 -20   33.64    2.27   0
 -10  -4 -19    4.93    2.48   0
 -10  -4 -18   21.08    2.60   0
 -10  -4 -17  178.17    3.54   0
 -10  -4 -16  123.65    3.20   0
 -10  -2 -11    1.60    2.28   0
 -10   0  -9    2.07    2.43   0
 -10   2 -10  152.34    3.27   0
  -9  -5  -8   55.75    2.58   0
 -10  -2 -24   35.13    1.93   0
 -10   0 -10  433.59    4.28   0
 -10   2 -11   -0.62    2.45   0
 -10   4 -19   -0.55    1.97   0
  -9  -5  -9    4.68    2.27   0
 -10  -2 -23   70.60    2.16   0
 -10  -2 -14    7.76    2.30   0
 -10  -2 -13   23.33    2.43   0
 -10   0 -25   -2.05    2.19   0
 -10   0 -12   27.29    2.54   0
 -10   0 -11    2.11    2.37   0
 -10   2 -24   34.81    2.32   0
 -10   2 -13   25.36    2.98   0
 -10   2 -12    0.13    2.34   0
  -9  -5 -26   48.65    2.01   0
  -9  -5 -10   82.12    2.79   0
  -9  -3  -7    1.22    2.07   0
 -10  -2 -22    1.67    2.17   0
 -10  -2 -21    4.32    2.18   0
 -10  -2 -20   19.35    2.91   0
 -10  -2 -15   21.65    2.56   0
 -10   0 -24  173.64    2.89   0
 -10   0 -13   -1.41    2.42   0
 -10   2 -23   72.41    2.25   0
 -10   2 -14    7.88    2.39   0
  -9  -5 -11   18.91    2.54   0
 -10  -2 -19    4.55    2.84   0
 -10  -2 -18   43.73    3.00   0
 -10   0 -23    1.54    2.19   0
 -10   0 -22  141.29    3.16   0
 -10   0 -15   -2.35    2.48   0
 -10   0 -14  537.45    4.61   0
 -10   2 -22    3.45    2.08   0
 -10   2 -21    8.21    2.27   0
 -10   2 -20   18.97    2.60   0
 -10   2 -17    0.90    2.87   0
  -9  -5 -25   63.41    1.96   0
  -9  -5 -12   11.84    2.52   0
  -9  -3  -8  226.35    3.33   0
 -10   0 -21    3.00    2.28   0
 -10   0 -20   33.61    2.52   0
 -10   0 -19   -1.06    2.61   0
 -10   0 -18    8.75    2.82   0
 -10   0 -16   45.08    2.87   0
 -10   2 -19    5.63    2.40   0
 -10   2 -18   35.52    2.26   0
  -9  -5 -24    5.93    1.82   0
  -9  -5 -23   20.21    2.49   0
  -9  -5 -15   57.72    3.23   0
  -9  -3  -9   26.23    2.23   0
  -9   3  -8  220.38    3.35   0
  -9  -5 -22   88.51    2.63   0
  -9  -5 -21   28.70    2.34   0
  -9  -5 -18   37.24    3.53   0
  -9  -5 -17  183.29    3.66   0
  -9  -5 -16    6.16    2.79   0
  -9  -3 -28   15.21    1.50   0
  -9  -3 -10  165.49    3.20   0
  -9   3  -9   26.64    2.30   0
  -9  -5 -19  321.69    4.16   0
  -9  -3 -27   26.47    2.12   0
  -9  -3 -11    6.55    2.22   0
  -9  -1  -9    6.47    2.22   0
  -8  -6 -27   86.76    2.15   0
  -9  -3 -12    8.44    2.29   0
  -9  -1 -29    3.36    2.07   0
  -9  -1 -10    5.42    2.23   0
  -9   1  -9    2.82    2.44   0
  -9   3 -10  161.58    2.99   0
  -9  -3 -14    3.75    2.40   0
  -9  -3 -13   10.36    2.35   0
  -9  -1 -11   18.40    2.50   0
  -9   1 -10    1.45    2.40   0
  -8  -6 -26   12.80    1.83   0
  -8  -6 -14   22.17    2.30   0
  -8  -6 -13    3.51    2.40   0
  -9  -3 -25   30.55    2.13   0
  -9  -3 -16   49.01    2.84   0
  -9  -3 -15   26.10    2.93   0
  -9  -1 -28   13.79    1.91   0
  -9  -1 -12  352.18    4.06   0
  -9   1 -11   13.50    2.50   0
  -9   3 -27   25.52    2.49   0
  -9   3 -12    7.47    2.20   0
  -8  -6 -24   11.64    2.42   0
  -8  -6 -15  121.25    3.02   0
  -9  -3 -23   49.48    2.77   0
  -9  -3 -20  208.50    4.18   0
  -9  -3 -19   55.61    3.22   0
  -9  -3 -18   29.02    2.60   0
  -9  -3 -17   47.02    2.72   0
  -9  -1 -27   27.11    2.20   0
  -9   1 -28   11.82    2.28   0
  -9   1 -12  343.98    4.14   0
  -9   3 -13   10.42    2.49   0
  -8  -6 -18   53.08    2.80   0
  -8  -4 -30    2.24    1.67   0
  -9  -1 -26   92.03    2.55   0
  -9   1 -27   26.66    2.14   0
  -9   1 -13   15.00    2.88   0
  -9   3 -26   27.98    2.12   0
  -9   3 -25   32.86    2.48   0
  -9   3 -15   29.49    2.59   0
  -9   3 -14    1.47    2.34   0
  -8  -6 -21  215.29    3.56   0
  -8  -6 -20   63.15    2.86   0
  -8  -6 -19   21.46    2.65   0
  -9  -1 -25   41.12    2.37   0
  -9  -1 -24   41.78    2.67   0
  -9  -1 -16  164.06    3.45   0
  -9  -1 -15    4.15    2.33   0
  -9   1 -26   94.99    2.56   0
  -9   1 -15    5.26    2.61   0
  -9   1 -14  164.86    3.46   0
  -9   3 -24    5.17    2.12   0
  -9   3 -17   47.92    3.19   0
  -8  -4 -29    3.67    1.75   0
  -7  -5 -32   -0.66    1.68   0
  -9  -1 -21   71.82    3.05   0
  -9  -1 -20    7.72    2.66   0
  -9  -1 -18  210.88    3.71   0
  -9  -1 -17    5.99    2.51   0
  -9   1 -25   42.28    2.26   0
  -9   1 -24   31.34    2.52   0
  -9   1 -17    0.19    2.79   0
  -9   3 -22   19.03    2.47   0
  -9   3 -20  188.97    3.69   0
  -9   3 -19   52.15    2.99   0
  -9   3 -18   26.90    2.62   0
  -9   1 -21   64.49    3.12   0
  -9   1 -20    9.08    2.70   0
  -9   1 -19   23.99    2.76   0
  -8  -4 -27   13.52    2.01   0
  -8  -2 -31    1.94    1.71   0
  -8  -4 -16   94.92    2.89   0
  -8  -4 -15  141.13    3.12   0
  -8   0 -32   59.90    2.20   0
  -7  -5 -31   22.57    1.63   0
  -8  -4 -23   -1.81    2.83   0
  -8  -4 -18   57.95    3.13   0
  -8  -4 -17  146.88    3.32   0
  -8   4 -30    3.49    2.29   0
  -4   0 -31   -0.72    2.23   0
  -4   4 -36   30.88    2.24   0
  -3   1 -34   84.51    3.00   0
  -3   7 -38   35.14    2.27   0
  -2   0 -33    1.49    2.05   0
  -1   9 -38   65.97    1.88   0
   0   0 -32    2.21    2.23   0
   0   2 -35   74.64    2.86   0
   1   1 -32  479.45    4.77   0
  -3   5 -37    1.57    1.92   0
  -2   6 -38    9.48    1.97   0
  -2   8 -38    2.32    1.85   0
  -1   1 -34   24.73    2.44   0
  -1   7 -38    0.85    1.90   0
   0   6 -37  111.16    2.76   0
   1   7 -36    1.55    2.01   0
  -5   5 -34    0.71    2.02   0
  -4   0 -30  153.51    3.07   0
  -4   2 -33  339.32    4.24   0
  -4   4 -35   15.09    2.49   0
  -2   0 -32   17.13    2.34   0
  -2   2 -35  185.05    3.26   0
   0   2 -34   43.67    2.55   0
   0   4 -36  147.85    2.99   0
   0   8 -37    5.26    1.76   0
  -4   6 -36   25.21    2.14   0
  -3   3 -35  174.57    3.41   0
  -3   7 -37    3.04    1.91   0
  -3   9 -37    9.76    2.20   0
   1   3 -33   27.71    2.68   0
  -4   8 -36    8.15    2.22   0
  -3   1 -32   53.26    2.90   0
  -3   5 -36   20.33    2.34   0
  -2   4 -36   73.33    2.73   0
  -2   6 -37  255.07    3.22   0
  -1   3 -35   55.38    2.47   0
  -1   7 -37    1.97    1.84   0
  -1   9 -37   42.58    2.01   0
   0   4 -35   65.47    2.58   0
   0  10 -36   19.90    1.68   0
  -5   5 -33   33.52    2.33   0
  -5   7 -34   31.48    2.13   0
  -3   3 -34   33.23    2.44   0
  -2   8 -37   32.46    2.01   0
  -1   1 -32   27.47    2.38   0
  -1   5 -36   52.66    2.82   0
   0   8 -36   34.62    2.39   0
  -4   6 -35   98.42    2.32   0
  -3   1 -31   23.53    2.52   0
  -3   7 -36   27.85    2.28   0
  -2   2 -33  127.53    3.15   0
  -2   4 -35   64.90    2.47   0
   0   2 -32   15.23    2.34   0
   0   4 -34   84.50    3.40   0
   1   3 -32   11.56    1.97   0
  -4   2 -31    3.37    2.38   0
  -4   8 -35   -3.65    2.04   0
  -3   9 -36   18.37    1.95   0
  -2  10 -36    7.22    1.72   0
  -1   7 -36    4.17    2.11   0
  -1   9 -36    3.52    2.02   0
   1   7 -34    4.31    1.97   0
  -5   7 -33    8.91    1.81   0
  -4   4 -33   42.82    2.39   0
  -2   2 -32   18.30    2.32   0
  -2   8 -36   10.33    1.87   0
  -1   5 -35    2.41    1.98   0
   0  10 -35  162.32    2.43   0
   1   9 -34    0.62    1.85   0
  -5   9 -33    3.58    2.27   0
  -4   2 -30    8.26    2.04   0
  -4   6 -34    8.06    2.09   0
  -3   7 -35   80.08    2.87   0
  -2   4 -34  133.87    2.98   0
  -2   6 -35   58.93    3.13   0
  -1  11 -35   25.94    1.75   0
   0   4 -33   12.32    2.40   0
   0   8 -35   17.17    2.16   0
  -4   8 -34    9.73    2.03   0
  -4  10 -34   20.30    2.43   0
  -3   3 -32  182.29    3.43   0
  -3   5 -34    1.33    2.23   0
  -3   9 -35   18.78    1.98   0
  -2   2 -31    2.30    2.34   0
  -1   5 -34   14.39    2.15   0
   1   5 -32   86.09    2.63   0
  -5   7 -32   13.42    2.00   0
  -4   2 -29   81.96    2.68   0
  -2   4 -33   70.77    2.63   0
  -2   8 -35    1.35    2.12   0
  -2  10 -35   62.36    2.15   0
  -2  12 -34   81.28    2.11   0
  -1   3 -32   48.82    2.50   0
  -1   9 -35    2.12    1.79   0
   0   4 -32   31.66    2.36   0
   0  10 -34   86.33    2.37   0
  -5   9 -32   -0.18    1.75   0
  -3   3 -31  170.11    3.30   0
  -3   5 -33    4.74    2.37   0
  -3  11 -34   36.94    1.96   0
  -1  11 -34   -2.72    2.25   0
   0  12 -33    0.39    1.57   0
  -5   5 -30   77.95    2.74   0
  -4   4 -31    0.99    2.27   0
  -4  10 -33   17.33    2.41   0
  -3   9 -34    3.56    1.85   0
  -2   4 -32   65.67    2.56   0
  -1   5 -33    5.51    2.32   0
  -1   7 -34   13.58    2.32   0
   0   4 -31    1.73    2.03   0
   1   7 -32    7.28    2.14   0
  -5   7 -31   10.24    1.88   0
  -5  11 -31    4.64    2.10   0
  -4   6 -32   23.75    2.51   0
  -4  12 -32    2.12    1.93   0
  -3   3 -30  179.09    3.59   0
  -2  10 -34    2.05    1.76   0
  -1   9 -34   -2.59    2.00   0
   0   8 -33    0.17    2.13   0
   0  10 -33    3.81    1.71   0
   1   9 -32   53.18    2.22   0
  -5   9 -31   14.75    2.29   0
  -4   4 -30   16.14    2.42   0
  -3   7 -33   -0.38    2.37   0
  -3  11 -33    1.89    2.12   0
  -2  12 -33   21.76    1.84   0
  -1   5 -32   73.35    2.93   0
  -1   7 -33    8.29    2.69   0
   0   6 -32    0.88    2.29   0
   0  12 -32   61.58    1.94   0
   1   7 -31  120.18    2.91   0
  -5   5 -29   11.85    2.28   0
  -3   9 -33   48.33    2.31   0
  -2   4 -31    1.66    2.22   0
  -1  11 -33   72.15    2.07   0
  -1  13 -32    9.59    1.48   0
   1   9 -31   17.34    2.33   0
  -4   4 -29    8.52    2.01   0
  -4   6 -31   12.12    2.27   0
  -4  10 -32   83.37    2.23   0
  -3   5 -31    6.82    2.28   0
  -2   6 -32   23.33    2.34   0
  -2   8 -33   26.16    2.29   0
  -2  10 -33   30.11    2.16   0
  -1   5 -31   11.09    2.13   0
   0   6 -31    2.58    2.17   0
   0   8 -32   22.96    2.47   0
  -5   5 -28   22.64    2.26   0
  -5   9 -30  265.07    3.37   0
  -5  11 -30    5.21    2.10   0
  -4  12 -31    2.20    2.10   0
  -3   7 -32    2.53    2.02   0
  -2  12 -32   30.85    2.24   0
  -1   7 -32    9.23    2.25   0
   0  12 -31   -3.07    2.01   0
   1   7 -30   48.23    2.38   0
  -5   7 -29   53.53    2.79   0
  -4   4 -28  119.20    3.09   0
  -4   8 -31    2.94    2.38   0
  -3  11 -32   74.19    2.11   0
  -3  13 -31  104.62    2.14   0
  -1   9 -32   30.08    2.67   0
  -1  11 -32  220.93    2.91   0
  -1  13 -31  112.16    2.28   0
   1   9 -30    3.85    1.96   0
  -4  10 -31   10.99    1.94   0
  -3   7 -31    8.78    2.11   0
  -2   6 -31   10.21    2.21   0
  -2   8 -32   94.80    2.61   0
  -1  15 -29    0.04    1.44   0
   0   6 -30    6.02    2.03   0
   0   8 -31   29.33    2.44   0
   0  10 -31   55.87    2.44   0
   0  14 -29    8.54    1.73   0
  -5   9 -29   17.73    2.11   0
  -5  11 -29   25.00    2.03   0
  -5  13 -28    5.96    2.10   0
  -4  12 -30   20.63    1.89   0
  -2  14 -30   90.75    2.18   0
  -1   7 -31   17.46    2.24   0
  -6  12 -26    7.77    1.73   0
  -5   7 -28  103.94    2.71   0
  -4   6 -29    0.17    2.33   0
  -4   8 -30   85.24    2.81   0
  -3   9 -31   85.21    2.70   0
  -3  11 -31   44.25    2.25   0
  -3  13 -30   19.20    2.06   0
  -2   6 -30    3.09    2.14   0
  -2   8 -31   22.41    2.24   0
  -2  12 -31    6.25    1.86   0
  -1   9 -31   24.50    2.34   0
  -1  13 -30   81.65    2.50   0
   0  12 -30   25.60    1.94   0
   1   9 -29    7.94    2.04   0
  -4  10 -30  104.91    2.63   0
  -3   7 -30  174.92    3.22   0
  -3  15 -28   14.46    1.99   0
  -2  10 -31   -1.11    2.48   0
   0  10 -30  104.17    2.77   0
  -5  11 -28   15.80    2.07   0
  -5  13 -27   35.17    2.54   0
  -4   6 -28   35.98    2.60   0
  -4   8 -29    9.51    2.64   0
  -4  12 -29   -4.27    1.84   0
  -4  14 -28   27.68    2.13   0
  -2  14 -29   45.59    1.96   0
  -1  15 -28   15.53    1.61   0
   0  14 -28    0.55    1.58   0
   1   9 -28   40.17    2.48   0
  -5   7 -27   66.23    2.69   0
  -3   7 -29  103.25    2.78   0
  -3  13 -29   29.27    1.86   0
  -2   6 -29    1.39    2.08   0
  -2  12 -30    7.28    2.06   0
  -1   9 -30    7.71    2.30   0
  -1  11 -30   23.60    2.38   0
  -1  13 -29   13.83    2.07   0
   0   8 -29   17.25    2.31   0
  -4   6 -27   16.33    2.80   0
  -1   7 -29  191.48    3.23   0
  -6  10 -25   46.83    2.10   0
  -5   7 -26    7.12    2.13   0
  -4  12 -28    2.74    1.99   0
  -4  14 -27   39.10    1.96   0
  -3   9 -29   14.80    2.27   0
  -3  15 -27    5.04    1.74   0
  -2   8 -29    2.96    2.15   0
  -2  14 -28   25.79    1.89   0
  -2  16 -26    8.23    1.84   0
  -1   9 -29   46.77    2.61   0
  -1  15 -27   56.76    1.86   0
   0   8 -28   39.50    2.39   0
   0  14 -27   33.78    1.90   0
  -6  12 -24  169.45    2.57   0
  -5  15 -24   -2.35    2.18   0
  -4  10 -28  140.40    3.04   0
  -3   7 -28   77.69    2.59   0
  -3  13 -28   32.89    2.09   0
  -2  10 -29  105.32    2.69   0
  -1  11 -29    0.59    2.07   0
   0  10 -28    7.14    2.08   0
  -5   7 -25   12.08    2.42   0
  -6  14 -22   19.15    2.31   0
  -5  13 -25    7.45    2.23   0
  -4  12 -27    5.14    2.02   0
  -4  14 -26    5.54    1.96   0
  -4  16 -24    1.29    2.06   0
  -3  11 -28    3.49    1.95   0
  -3  15 -26    5.42    1.89   0
  -2  12 -28    2.47    2.34   0
  -2  14 -27   64.46    2.16   0
  -1   9 -28    1.91    2.33   0
  -1  11 -28   -0.85    2.10   0
  -1  15 -26   -0.58    1.84   0
   0  12 -27   -2.30    2.19   0
   0  14 -26    4.86    1.89   0
  -6  12 -23    0.02    1.86   0
  -3  13 -27   30.84    2.19   0
  -2  10 -28   23.36    2.39   0
  -2  16 -25    7.79    1.70   0
   0  10 -27   21.33    2.23   0
  -5   7 -24   58.13    2.39   0
  -5   9 -25    0.87    2.17   0
  -5  15 -23   69.79    2.31   0
  -3   9 -27   44.88    2.39   0
  -3  17 -23   52.91    1.77   0
  -2   8 -27   50.08    2.40   0
  -1  17 -23   35.60    1.73   0
  -6  14 -21   48.03    2.36   0
  -5  13 -24    9.10    1.88   0
  -4  10 -26   46.27    2.49   0
  -4  14 -25  147.54    2.45   0
  -4  16 -23    2.23    2.01   0
  -3  11 -27   24.35    2.23   0
  -3  15 -25    5.56    1.83   0
  -2  12 -27   22.46    2.35   0
  -2  14 -26   17.90    2.13   0
  -1   9 -27    3.79    2.02   0
  -1  11 -27   42.52    2.72   0
  -1  15 -25   17.63    1.94   0
   0  12 -26   10.12    2.35   0
  -6  12 -22  109.83    2.36   0
  -2  16 -24   16.60    1.79   0
  -1  13 -26   13.61    2.47   0
   0  10 -26    1.86    2.01   0
  -5  11 -24    6.23    2.06   0
  -5  15 -22    3.30    2.01   0
  -4  12 -25   38.11    2.83   0
  -3   9 -26   25.46    2.46   0
  -3  11 -26   25.30    2.56   0
  -3  17 -22    1.56    1.78   0
  -1  17 -22   19.85    1.81   0
  -6  14 -20   21.78    1.63   0
  -5  13 -23  163.26    2.70   0
  -4  10 -25   22.56    2.82   0
  -4  14 -24   78.05    2.43   0
  -4  16 -22   11.85    1.83   0
  -3  15 -24    5.99    1.98   0
  -2  10 -26   13.44    2.19   0
  -2  12 -26   58.50    2.30   0
  -1  11 -26    2.67    2.28   0
  -1  15 -24   11.59    1.96   0
   0  10 -25   29.88    2.20   0
   0  12 -25   31.13    2.30   0
   0  14 -24   -0.10    1.90   0
   0  16 -22    1.48    1.55   0
  -5   9 -23    8.28    2.34   0
  -5  11 -23    1.34    2.56   0
  -5  15 -21    0.67    2.24   0
  -4   8 -24   30.88    2.46   0
  -3  13 -25    2.22    2.07   0
  -2  16 -23   13.25    1.76   0
  -2  18 -20    2.54    1.73   0
  -1  13 -25   27.68    2.35   0
  -6  16 -17   59.87    2.25   0
  -5  17 -18   11.07    2.20   0
  -4  10 -24   66.21    3.20   0
  -4  12 -24  300.98    3.62   0
  -4  14 -23   57.28    2.47   0
  -3   9 -25   33.08    2.30   0
  -3  11 -25    8.18    2.18   0
  -3  17 -21   17.25    1.68   0
  -2  12 -25   55.37    2.42   0
  -1  11 -25   16.06    2.21   0
  -1  17 -21    2.42    1.64   0
   0  12 -24    2.91    2.23   0
  -6  14 -19   52.37    2.15   0
  -5   9 -22   20.98    2.16   0
  -4  16 -21   12.46    2.00   0
  -3  15 -23   53.95    2.30   0
  -2  14 -24   35.37    2.43   0
   0  14 -23  182.83    3.03   0
   0  16 -21   41.31    1.87   0
  -5  11 -22  112.89    2.98   0
  -5  15 -20    4.49    1.74   0
  -2  16 -22    4.95    1.80   0
  -2  18 -19    9.73    1.73   0
  -1  13 -24   58.09    2.57   0
  -6  14 -18    1.55    2.17   0
  -6  16 -16   98.84    2.47   0
  -5  17 -17   -0.66    2.58   0
  -4  12 -23    2.57    2.36   0
  -3  11 -24    1.00    2.11   0
  -3  17 -20    4.87    1.78   0
  -2  10 -24   57.07    2.43   0
  -2  14 -23  238.01    3.45   0
  -1  11 -24    1.16    2.01   0
  -1  17 -20   10.83    1.90   0
   0  12 -23  108.96    2.79   0
   0  14 -22    4.28    1.99   0
  -6  12 -19   26.18    2.13   0
  -5   9 -21   11.26    2.17   0
  -5  11 -21    4.41    2.65   0
  -4  16 -20   25.78    1.88   0
  -4  18 -17   49.82    2.01   0
  -2  16 -21    2.13    1.97   0
  -1  13 -23   73.66    2.73   0
  -1  19 -16   97.22    1.76   0
  -6  16 -15    5.13    2.32   0
  -4  12 -22    2.27    2.24   0
  -3  11 -23    2.31    2.09   0
  -3  17 -19   18.14    2.10   0
  -2  18 -18   46.71    2.08   0
  -1  11 -23   40.45    2.36   0
  -6  12 -18   78.38    2.47   0
  -6  14 -17   13.53    1.99   0
  -5   9 -20   15.44    2.20   0
  -5  13 -20   26.98    2.37   0
  -5  17 -16   31.37    2.29   0
  -4  14 -21   41.44    2.63   0
  -4  16 -19    2.79    1.92   0
  -4  18 -16    5.00    2.10   0
  -2  12 -23  124.62    3.01   0
  -2  14 -22   55.37    2.75   0
  -1  15 -21  174.21    2.97   0
  -1  17 -19   76.14    2.21   0
   0  12 -22   -1.74    2.12   0
   0  14 -21   76.74    2.49   0
  -5  11 -20  141.63    3.10   0
  -5  15 -18   82.08    2.30   0
  -3  13 -22  190.32    3.16   0
  -3  19 -15   34.34    1.76   0
  -1  13 -22    9.82    2.33   0
  -1  19 -15  121.19    2.11   0
  -6  12 -17    3.17    2.28   0
  -6  16 -14  153.30    2.35   0
  -5  13 -19    3.30    2.27   0
  -5  17 -15   52.15    2.47   0
  -4  10 -21    4.29    2.26   0
  -4  14 -20   79.73    2.77   0
  -3  11 -22  117.87    2.84   0
  -3  15 -20   31.84    2.61   0
  -3  17 -18   10.18    1.93   0
  -2  12 -22   83.03    2.63   0
  -2  18 -17   93.32    2.22   0
  -1  17 -18    0.57    1.70   0
  -5  11 -19   75.43    2.53   0
  -4  16 -18   17.29    2.14   0
  -4  18 -15    3.71    1.73   0
  -3  13 -21  259.40    3.55   0
  -3  19 -14   51.55    1.85   0
  -2  14 -21   48.80    2.33   0
  -1  13 -21  245.33    3.50   0
  -1  15 -20    3.90    2.19   0
  -1  19 -14   65.48    2.19   0
   0  14 -20   11.01    2.22   0
   0  16 -18   47.18    2.10   0
  -6  16 -13   82.61    2.02   0
  -5  15 -17   38.73    2.25   0
  -4  12 -20  255.54    3.58   0
  -3  11 -21    3.23    2.06   0
  -2  18 -16    4.64    1.60   0
  -6  12 -16   83.98    2.38   0
  -5  13 -18    1.66    2.18   0
  -5  17 -14   23.24    1.86   0
  -4  14 -19  140.70    2.87   0
  -4  16 -17    3.42    2.05   0
  -4  18 -14   42.40    1.95   0
  -3  15 -19   13.69    2.10   0
  -3  17 -17    5.73    1.96   0
  -2  14 -20  100.57    2.66   0
  -1  15 -19   -3.38    2.19   0
   0  14 -19  152.41    2.84   0
  -6  16 -12   -1.47    2.03   0
  -5  11 -18    1.22    2.02   0
  -3  13 -20   21.20    2.29   0
  -3  19 -13   22.49    1.79   0
  -2  16 -18   14.59    2.32   0
  -1  13 -20   17.07    2.32   0
   0  16 -17  114.28    2.45   0
  -6  12 -15    4.27    2.01   0
  -5  13 -17   40.94    2.62   0
  -5  17 -13    1.95    1.68   0
  -4  14 -18   -0.53    2.04   0
  -3  15 -18   10.00    2.02   0
  -3  17 -16   33.62    2.15   0
  -2  12 -20   60.49    2.46   0
  -2  18 -15   51.22    2.06   0
  -5  11 -17   87.79    2.68   0
  -4  18 -13   15.99    1.88   0
  -3  19 -12    0.09    1.63   0
  -2  14 -19  178.49    3.04   0
  -2  16 -17   -0.75    2.45   0
  -2  20 -10    1.58    1.56   0
  -1  15 -18    4.88    2.27   0
  -1  19 -12    5.03    1.79   0
   0  14 -18    9.57    1.93   0
   0  16 -16    0.65    2.16   0
  -6  14 -13   48.64    2.18   0
  -5  13 -16   13.06    2.23   0
  -5  17 -12  220.93    2.87   0
  -4  12 -18   52.11    2.43   0
  -4  14 -17   64.64    2.33   0
  -2  18 -14   80.60    2.19   0
  -1  13 -19   29.44    2.18   0
  -6  12 -14    9.77    2.03   0
  -4  18 -12   56.59    2.08   0
  -3  15 -17    0.91    1.92   0
  -3  19 -11    5.64    1.77   0
  -2  20  -9    3.61    1.56   0
  -1  17 -15  141.35    2.85   0
  -6  16 -10  152.98    2.66   0
  -5  11 -16   10.42    2.03   0
  -5  15 -14   19.88    2.35   0
  -3  13 -18   12.54    2.12   0
  -2  16 -16   70.74    2.49   0
  -2  18 -13   -0.14    2.22   0
  -1  19 -11    4.52    1.64   0
   0  16 -15    6.20    1.95   0
  -6  14 -12    2.39    1.99   0
  -5  13 -15   29.76    2.32   0
  -5  17 -11    8.53    1.86   0
  -4  12 -17   -1.21    2.30   0
  -4  14 -16   94.16    2.56   0
  -4  16 -14   87.58    2.71   0
  -3  15 -16    4.89    1.96   0
  -3  19 -10    1.85    2.03   0
  -6  16  -9   55.91    2.16   0
  -5  15 -13  125.53    2.99   0
  -3  13 -17   12.21    2.21   0
  -2  14 -17  130.35    2.73   0
  -2  16 -15    5.18    2.14   0
  -1  15 -16    7.24    2.12   0
  -1  19 -10   25.47    1.86   0
   0  14 -16   13.83    2.00   0
   0  16 -14    6.13    2.18   0
  -6  14 -11   26.98    2.13   0
  -5  13 -14   -0.54    2.09   0
  -5  17 -10   95.20    2.24   0
  -5  19  -5   52.82    2.22   0
  -4  12 -16    5.24    2.03   0
  -4  14 -15  191.13    3.05   0
  -4  16 -13   11.33    2.10   0
  -4  18 -10   11.38    1.84   0
  -2  18 -12   85.49    2.37   0
  -6  16  -8  116.08    2.50   0
  -5  15 -12  105.45    2.73   0
  -4  20  -4    3.36    2.13   0
  -3  13 -16    6.02    1.99   0
  -3  15 -15    1.18    2.06   0
  -3  19  -9    1.04    1.65   0
  -1  15 -15    1.50    2.06   0
  -1  17 -13  152.84    2.71   0
  -6  14 -10  103.42    2.50   0
  -5  17  -9   51.15    2.10   0
  -4  14 -14    7.72    2.05   0
  -4  18  -9   34.46    2.00   0
  -3  17 -12   72.01    2.41   0
  -2  16 -14    8.69    2.23   0
   0  16 -13   70.86    2.36   0
  -6  16  -7   13.26    1.83   0
  -5  15 -11  103.87    2.66   0
  -4  16 -12   -0.85    1.84   0
  -3  15 -14   47.64    2.46   0
  -1  17 -12   75.91    2.53   0
  -6  14  -9   82.64    2.37   0
  -5  17  -8   17.15    2.00   0
  -4  18  -8    8.77    1.97   0
  -3  17 -11   84.65    2.30   0
  -2  14 -15   50.35    2.16   0
  -2  16 -13   27.95    2.40   0
  -2  20  -5   83.47    2.06   0
  -1  15 -14    1.49    2.20   0
   0  16 -12   18.73    1.85   0
  -6  16  -6    8.27    1.76   0
  -5  13 -12   70.12    2.48   0
  -5  15 -10   26.60    2.64   0
  -4  14 -13    9.23    1.93   0
  -4  16 -11   26.26    1.96   0
  -3  15 -13   39.28    2.21   0
  -1  17 -11    4.67    1.95   0
  -4  18  -7   62.10    2.23   0
  -3  17 -10   98.97    2.66   0
  -2  14 -14   29.19    2.12   0
  -2  16 -12    3.42    2.14   0
  -2  20  -4    6.78    1.90   0
  -1  15 -13    5.53    1.93   0
   0  18  -8    4.21    1.84   0
  -5  13 -11    5.30    1.90   0
  -4  14 -12   96.86    2.44   0
  -4  16 -10   70.57    2.33   0
  -1  17 -10  110.20    2.88   0
   0  16 -11   -0.26    1.71   0
  -6  14  -7    9.26    1.95   0
  -6  18   2   41.32    2.58   0
  -5  15  -9   -0.68    2.17   0
  -4  18  -6    3.93    1.88   0
  -3  15 -12   42.42    2.23   0
  -2  18  -8    1.74    2.23   0
  -4  14 -11   42.46    2.10   0
  -4  16  -9    0.98    1.94   0
  -3  17  -9   16.77    1.95   0
   0  16 -10   60.67    2.19   0
  -6  14  -6    7.23    1.99   0
  -5  15  -8   23.19    2.25   0
  -3  15 -11   99.30    2.59   0
  -3  19  -4  118.16    2.31   0
  -1  17  -9    7.37    2.05   0
  -4  16  -8  146.21    2.66   0
  -3  17  -8    6.58    1.90   0
  -2  16 -10   38.20    2.17   0
  -1  15 -11   85.82    2.42   0
   0  16  -9    4.29    1.88   0
  -6  14  -5   33.37    2.14   0
  -5  15  -7   -2.31    2.20   0
  -4  14 -10    3.77    1.77   0
  -3  15 -10    7.19    2.02   0
  -2  18  -6    0.30    2.00   0
  -1  17  -8   -0.69    2.03   0
  -4  16  -7   15.38    1.98   0
  -3  17  -7   33.64    2.13   0
  -2  16  -9    1.43    1.86   0
  -1  19  -3    4.12    1.77   0
  -6  14  -4   21.46    2.00   0
  -5  15  -6   -0.47    2.20   0
  -5  19   6   73.59    2.40   0
  -4  14  -9   26.12    2.13   0
  -3  15  -9   -1.43    2.01   0
  -2  18  -5    2.31    1.96   0
  -1  17  -7    2.76    2.24   0
   0  16  -8   95.95    2.28   0
  -5  19   7  204.19    2.85   0
  -4  16  -6   90.85    2.52   0
  -2  16  -8  146.88    2.60   0
  -6  14  -3  267.82    3.18   0
  -4  14  -8   12.52    2.05   0
  -3  15  -8   73.08    2.37   0
  -2  18  -4    2.48    2.10   0
  -1  17  -6    7.24    2.05   0
   0  16  -7   17.62    1.76   0
  -4  16  -5    9.77    2.08   0
  -2  16  -7   21.65    1.89   0
  -1  17  -5   96.58    2.49   0
   0  16  -6   65.65    2.11   0
  -4  16  -4   20.21    2.09   0
  -3  15  -7   19.62    2.09   0
  -2  16  -6   68.81    2.20   0
  -3  17  -3    4.00    1.87   0
  -1  17  -4  166.65    2.81   0
   0  16  -5   15.54    1.98   0
   0  18  -1  114.40    2.29   0
  -5  15  -2  237.54    3.24   0
  -3  15  -6   17.25    2.01   0
  -2  16  -5   11.70    1.85   0
  -2  20   8   58.98    2.12   0
  -3  17  -2  111.25    2.50   0
  -2  20   9    1.13    1.71   0
   0  18   0  232.68    2.84   0
  -5  15  -1  214.28    3.11   0
  -2  16  -4    9.65    1.84   0
  -2  20  10   17.66    1.77   0
  -2  20  11   27.01    1.57   0
   0  16  -4   14.17    1.77   0
  -4  16  -1   33.21    2.16   0
  -1  17  -2   85.02    2.47   0
  -5  17   6    1.25    2.04   0
  -4  18   5    2.89    2.18   0
  -2  16  -3    1.45    1.89   0
   0  16  -3   28.55    1.85   0
   0  18   2   37.30    2.00   0
  -6  16  10    9.50    1.90   0
  -5  17   7  122.09    2.67   0
  -4  18   6   -0.01    2.07   0
  -1  19   6   12.66    1.69   0
  -6  16  11   -0.01    1.62   0
  -5  17   8    0.38    1.82   0
  -4  18   7   84.09    2.51   0
  -3  19  10    2.14    1.73   0
  -2  16  -2  264.55    3.24   0
   0  16  -2   68.77    2.08   0
  -6  16  13    0.75    1.59   0
  -6  16  14   10.91    1.70   0
  -5  17   9    1.80    1.81   0
  -4  18   8    3.66    2.05   0
  -4  18   9  199.84    2.96   0
  -3  19  11   -0.00    1.88   0
  -3  19  12    5.03    1.86   0
  -1  19   8    8.55    1.99   0
   0  18   4    2.59    1.90   0
  -5  17  10   -0.79    1.86   0
  -3  19  13   14.89    1.78   0
  -3  19  14   57.54    1.91   0
  -3  19  15  126.79    2.22   0
  -3  19  16   67.68    2.25   0
  -2  16  -1   71.76    2.23   0
  -1  19   9   16.19    1.89   0
   0  16  -1    0.94    1.68   0
  -5  17  11   20.50    1.92   0
  -5  17  12    0.72    1.79   0
  -4  18  12    3.31    2.08   0
  -1  19  10    7.11    1.96   0
  -5  17  13   17.50    1.81   0
  -5  17  14    3.96    1.99   0
  -5  17  15   31.03    1.95   0
  -5  17  16    0.09    1.91   0
  -5  17  17   20.35    2.21   0
  -5  17  18   14.49    1.96   0
  -4  18  13   23.11    1.99   0
  -4  18  14    9.95    1.80   0
  -4  18  15    2.37    2.22   0
  -4  18  16   26.97    2.34   0
  -4  18  17   87.47    2.38   0
  -2  16   0  206.67    2.89   0
  -1  19  11   16.14    2.08   0
  -1  19  12   12.20    2.00   0
   0  16   0   26.97    1.92   0
  -1  19  13  102.41    2.08   0
  -1  19  14   54.82    2.28   0
  -1  19  15  213.71    2.62   0
  -1  19  17   39.42    1.87   0
  -5  15   6    7.98    2.46   0
  -2  18   8   -2.11    2.02   0
  -1  19  16   84.79    1.87   0
   0  18   8    1.98    2.04   0
  -1  17   4  110.83    2.83   0
   0  16   2   65.77    2.33   0
   0  18   9   33.54    2.26   0
  -4  16   6   42.35    2.22   0
  -1  17   5  116.45    2.68   0
   0  16   3   28.21    1.93   0
  -2  18  13  179.91    2.66   0
  -2  18  14   40.88    2.29   0
  -2  18  15   -0.88    1.82   0
  -2  18  20   19.30    1.65   0
  -2  18  21   14.95    1.54   0
   0  16   4   13.13    1.88   0
   0  18  13   65.80    2.01   0
   0  18  14   46.12    2.28   0
   0  18  21    7.40    1.27   0
  -5  15  11   56.84    2.26   0
  -2  16   5   27.74    2.03   0
  -2  18  16   43.74    1.89   0
  -2  18  17  206.70    2.58   0
  -2  18  18   58.76    2.03   0
  -2  18  19  122.66    2.11   0
  -1  17   8    2.36    2.15   0
   0  18  15   41.74    1.88   0
   0  18  16   34.99    1.96   0
   0  18  17  234.75    2.51   0
   0  18  18   40.86    1.65   0
   0  18  19   31.06    1.75   0
   0  18  20    0.72    1.48   0
  -5  15  13  181.16    2.85   0
  -5  15  23   53.21    2.26   0
  -3  17  12   57.77    2.18   0
  -3  17  23   10.43    2.10   0
  -2  16   6   85.87    2.41   0
  -1  17   9    5.23    2.11   0
  -5  15  14    5.19    2.16   0
  -5  15  22   11.25    2.16   0
  -4  16  12    4.88    2.05   0
  -4  16  24   12.32    1.92   0
  -3  15   5   10.23    1.81   0
  -3  17  22    7.09    1.75   0
  -1  17  10   27.20    2.53   0
   0  16   6   66.18    2.22   0
  -5  15  17    2.93    1.78   0
  -5  15  18    5.00    1.77   0
  -5  15  19    9.63    1.90   0
  -5  15  20   21.23    1.87   0
  -5  15  21   58.92    1.89   0
  -4  16  14   -0.66    2.20   0
  -4  16  22   31.71    2.30   0
  -4  16  23    0.38    2.00   0
  -3  15   6   13.25    1.84   0
  -3  17  16    3.43    2.01   0
  -3  17  17  131.16    2.53   0
  -3  17  18   10.31    1.91   0
  -3  17  19   51.59    1.91   0
  -3  17  20   23.30    2.03   0
  -3  17  21   10.89    1.76   0
  -2  16   7  154.10    2.75   0
  -1  17  11   88.15    2.50   0
   0  16   7   18.37    2.31   0
  -5  13   8  148.12    2.71   0
  -4  16  17    3.75    2.04   0
  -4  16  19    5.30    1.73   0
  -4  16  20   32.15    1.87   0
  -4  16  21    0.19    1.86   0
  -3  15   7   16.50    1.90   0
  -2  16   8   39.47    2.23   0
  -1  17  12   61.29    2.32   0
  -2  16   9   39.06    2.26   0
  -1  17  13   19.53    2.24   0
  -1  17  24   17.51    1.83   0
   0  16   8   96.53    2.38   0
  -5  13  10   32.37    1.98   0
  -4  14   8    2.43    1.99   0
  -2  16  10   43.87    2.15   0
  -1  17  14    3.80    2.19   0
  -1  17  15  394.77    3.72   0
  -1  17  23    3.54    1.62   0
   0  16   9    3.59    2.00   0
  -5  13  11   10.60    2.18   0
  -4  14   9   72.08    2.30   0
  -2  16  11    2.07    1.93   0
  -1  17  18   -0.09    1.94   0
  -1  17  19   79.09    2.18   0
  -1  17  20   24.56    1.86   0
  -1  17  21   11.42    1.63   0
  -1  17  22   12.66    1.66   0
   0  16  10   59.69    2.21   0
  -5  13  12  106.10    2.79   0
  -3  15  10    0.18    1.93   0
  -2  16  12    7.90    2.07   0
  -2  16  27    0.88    1.66   0
   0  16  11    1.33    1.83   0
  -5  13  13  197.03    3.23   0
  -5  13  27    2.15    1.58   0
  -4  14  11  329.37    3.53   0
  -3  15  28   11.57    2.09   0
  -2  16  26    5.60    1.60   0
   0  16  12   16.06    1.93   0
  -5  13  14    0.12    2.16   0
  -5  13  26    6.85    1.52   0
  -4  14  12    0.47    2.06   0
  -4  14  28   79.83    2.26   0
  -3  15  12   12.18    1.98   0
  -2  16  14   -0.29    1.97   0
  -2  16  15   44.57    2.17   0
  -2  16  25    8.33    1.69   0
   0  16  13   67.80    2.27   0
   0  16  27   52.83    1.59   0
  -5  13  15   53.61    2.47   0
  -5  13  16   24.10    2.62   0
  -5  13  25   12.70    1.59   0
  -4  14  13   -0.36    2.15   0
  -4  14  27   19.74    1.93   0
  -3  15  13  146.71    2.76   0
  -3  15  27    2.10    1.89   0
  -2  16  16   15.11    1.87   0
  -2  16  18    9.48    2.32   0
  -2  16  22   59.15    2.45   0
  -2  16  23    3.28    1.64   0
  -2  16  24    4.74    1.63   0
   0  16  26    4.70    1.34   0
  -5  13  17    1.70    2.12   0
  -5  13  18   16.02    2.16   0
  -5  13  23   63.24    2.03   0
  -5  13  24   41.10    1.94   0
  -4  14  14   22.02    2.27   0
  -4  14  26   16.69    1.81   0
  -3  15  14   84.08    2.43   0
  -3  15  15    5.55    1.99   0
  -3  15  26   51.55    1.98   0
  -2  16  19    7.86    2.31   0
  -2  16  21   35.68    2.10   0
   0  16  15    8.79    1.95   0
   0  16  16    3.78    1.91   0
   0  16  24    6.52    1.97   0
   0  16  25   24.15    1.60   0
  -5  13  20    2.09    2.04   0
  -4  14  16   14.43    2.33   0
  -4  14  25   53.02    1.97   0
  -3  15  16    6.00    2.03   0
  -3  15  17   22.02    2.10   0
  -3  15  25    7.55    1.68   0
   0  16  17  115.48    2.55   0
   0  16  18   49.09    2.27   0
   0  16  19   29.55    2.63   0
   0  16  22   -1.37    1.83   0
   0  16  23   30.23    2.01   0
  -4  14  17  106.57    2.68   0
  -4  14  18    2.16    2.23   0
  -4  14  19  112.00    2.69   0
  -4  14  20   -1.57    2.62   0
  -4  14  21   52.91    3.00   0
  -4  14  23   51.03    2.13   0
  -3  15  18   -0.18    1.86   0
  -3  15  20   28.88    2.55   0
  -3  15  23  115.87    2.52   0
  -1  15  12  123.91    2.63   0
  -1  15  29    2.46    1.61   0
   1  15  28   12.41    1.23   0
  -1  15  13   42.74    2.23   0
  -1  15  28    8.07    1.96   0
   1  15  27   51.02    1.80   0
  -2  14  31   -0.82    1.66   0
  -1  15  14   12.09    2.11   0
   1  15  15    3.84    1.73   0
   1  15  26   -1.54    1.71   0
  -4  12  31    2.08    1.83   0
  -2  14  30    5.59    1.48   0
  -1  15  15   35.27    2.19   0
  -1  15  26   22.36    2.02   0
  -1  15  27   24.69    1.78   0
   1  15  16    6.35    1.82   0
   1  15  17   12.55    1.94   0
   1  15  25   15.63    1.70   0
  -3  13  31    4.44    1.86   0
  -1  15  17   21.61    2.54   0
  -1  15  18   42.27    2.38   0
  -1  15  25   12.75    2.07   0
   0  14  31   11.37    1.52   0
   1  15  18    7.03    1.95   0
   1  15  19   -0.84    1.91   0
   1  15  20    4.53    1.88   0
   1  15  21  178.86    2.94   0
   1  15  24   11.92    1.66   0
  -4  12  30   88.04    1.95   0
  -3  13  30    3.23    1.77   0
  -2  14  29    4.05    1.66   0
  -1  15  19   29.12    2.37   0
  -1  15  20    3.28    2.15   0
  -1  15  21  167.66    3.01   0
  -1  15  22   13.33    2.34   0
  -4  12  29   53.17    1.89   0
  -3  13  29    3.21    1.89   0
  -2  14  15    4.24    1.89   0
  -2  14  27   26.48    2.32   0
  -2  14  28   26.60    1.76   0
   0  14  30   50.71    1.77   0
  -5  11  21    1.27    2.07   0
  -4  12  28    7.99    1.91   0
  -3  13  28   10.98    1.76   0
  -2  14  16    2.57    1.93   0
  -2  14  17   45.91    2.27   0
  -2  14  26   44.46    2.25   0
  -1  13  33   15.04    1.59   0
   0  14  29    6.52    1.99   0
  -4  12  17   23.88    2.33   0
  -4  12  27   36.31    2.03   0
  -3  13  16  120.15    2.61   0
  -3  13  27   33.59    1.98   0
  -2  14  18   14.51    2.09   0
  -2  14  19  124.71    2.85   0
  -2  14  20   18.34    2.19   0
  -2  14  21   86.32    2.46   0
  -2  14  22   72.29    2.36   0
  -2  14  23  100.09    2.45   0
  -6 -16  15    7.31    2.26   0
  -6 -14  18   39.83    2.73   0
  -6 -12  20  122.63    3.38   0
  -5 -11  21    3.97    2.95   0
  -4 -18  11   32.45    2.43   0
  -3 -15  17   24.62    2.82   0
  -3 -13  19   30.83    2.78   0
  -8 -14  14    4.98    2.66   0
  -7 -15  15    5.92    2.35   0
  -4 -12  20  345.44    4.42   0
  -2 -16  13   65.03    2.93   0
  -8 -12  16    5.70    2.00   0
  -6 -16  14   12.28    2.22   0
  -6 -12  19    1.63    2.70   0
  -6 -10  20  223.25    3.93   0
  -5 -13  19   17.01    2.52   0
  -5  -9  21   67.92    3.15   0
  -4 -14  18    0.69    2.43   0
  -3 -15  16    4.79    2.62   0
  -7 -15  14    0.78    2.36   0
  -5 -11  20   40.82    2.97   0
  -3 -13  18   53.66    2.75   0
  -2 -16  12   10.71    2.44   0
  -8 -14  13    3.33    2.45   0
  -7 -17   9   13.66    2.58   0
  -7 -11  18   39.91    2.58   0
  -6 -16  13   -0.45    2.51   0
  -5 -13  18   16.78    2.44   0
  -4 -16  14   -3.45    2.59   0
  -4 -14  17  102.62    3.08   0
  -4 -12  19    5.06    2.42   0
  -3 -17  11    4.69    2.46   0
  -2 -14  15    4.56    2.48   0
  -8 -12  15   52.15    2.39   0
  -7 -15  13   35.86    2.73   0
  -6 -12  18    6.06    2.65   0
  -6 -10  19  142.03    3.46   0
  -5 -15  15   23.59    2.47   0
  -5 -11  19   25.52    2.92   0
  -3 -17  10   -1.23    2.71   0
  -3 -13  17   19.41    2.65   0
  -2 -16  11    2.22    2.40   0
  -8 -14  12   43.75    2.87   0
  -7 -17   8    4.33    2.17   0
  -7 -11  17   72.69    2.82   0
  -5 -13  17   -0.41    2.96   0
  -4 -16  13   15.55    2.72   0
  -4 -14  16   16.21    2.57   0
  -4 -12  18   61.61    2.71   0
  -3 -15  14   82.03    3.15   0
  -2 -14  14   42.39    2.64   0
  -9 -13  10   56.13    2.66   0
  -8 -12  14   22.58    2.68   0
  -6 -16  12    2.64    2.25   0
  -6 -14  15   24.58    2.95   0
  -6 -12  17    6.71    2.53   0
  -3 -17   9   39.52    2.51   0
  -3 -13  16  118.16    3.26   0
  -7 -15  12   17.87    2.19   0
  -6 -10  18   17.83    2.66   0
  -5 -15  14    1.41    2.22   0
  -5 -11  18  294.70    4.13   0
  -4 -16  12    5.66    2.34   0
  -4 -14  15   53.42    2.76   0
  -4 -12  17   22.96    2.40   0
  -3 -15  13  146.47    3.37   0
  -8 -14  11  164.34    2.91   0
  -6 -16  11    1.82    2.26   0
  -6 -14  14   97.79    3.52   0
  -5 -17   9    4.28    2.20   0
  -3 -17   8    3.19    2.28   0
  -9 -13   9   47.35    2.52   0
  -8 -12  13   52.00    2.41   0
  -7 -15  11   11.25    2.21   0
  -6 -12  16    5.44    2.53   0
  -6 -10  17   50.81    2.91   0
  -5 -15  13  174.88    3.21   0
  -5 -11  17  105.36    3.24   0
  -4 -14  14   25.06    2.91   0
  -3 -17   7   23.01    2.59   0
  -8 -14  10   25.55    2.38   0
  -5 -13  15   55.46    2.71   0
  -9 -13   8   54.29    2.47   0
  -7 -15  10   10.57    2.31   0
  -7 -13  13   34.86    3.02   0
  -7 -11  15  125.73    3.16   0
  -6 -14  13    5.52    2.21   0
  -6 -12  15   87.95    3.15   0
  -3 -17   6    0.49    2.08   0
  -3 -15  11   41.60    2.85   0
  -8 -14   9  122.85    2.45   0
  -6 -10  16    5.58    2.50   0
  -5 -13  14    1.63    2.34   0
  -5 -11  16   39.44    2.79   0
  -4 -14  13    2.13    2.39   0
  -9 -13   7   88.73    2.33   0
  -7 -15   9   37.42    2.46   0
  -7 -13  12  190.53    3.56   0
  -7 -11  14    3.93    2.45   0
  -6 -16   8    7.35    2.23   0
  -6 -14  12   51.29    2.46   0
  -5 -15  11   53.38    2.51   0
  -3 -15  10   -1.38    2.40   0
  -8 -14   8    0.70    2.05   0
  -6 -12  14   41.22    2.85   0
  -4 -16   8    3.27    2.44   0
  -4 -14  12   -0.11    2.30   0
  -9 -13   6    1.93    2.05   0
  -7 -15   8    0.61    2.34   0
  -6 -14  11  207.04    3.47   0
  -6 -10  15   47.17    2.77   0
  -5 -15  10   32.23    2.42   0
  -5 -13  13  206.28    3.46   0
  -3 -15   9   97.35    2.86   0
  -8 -14   7    6.09    2.05   0
  -7 -11  13   27.64    2.55   0
  -6 -18  -3    0.78    2.09   0
  -6 -12  13   84.06    3.21   0
  -4 -16   7  116.82    3.17   0
  -9 -13   5   29.92    2.09   0
  -9 -11   8   23.54    2.14   0
  -6 -18  -4   -0.61    1.79   0
  -6 -14  10  191.43    3.38   0
  -5 -13  12  109.77    2.94   0
  -3 -15   8   47.61    2.29   0
  -8 -14   6   -2.14    2.07   0
  -8 -12   9   -4.12    2.90   0
  -8 -10  11   29.86    2.23   0
  -7 -13  10    5.92    2.38   0
  -7 -11  12   16.65    2.74   0
  -7  -9  13    4.30    2.64   0
  -4 -16   6   45.11    2.61   0
  -4 -14  10   47.68    2.35   0
  -3 -15   7   18.71    2.28   0
  -9 -13   4   15.96    2.09   0
  -5 -13  11   10.50    2.53   0
  -4 -16   5   11.24    2.40   0
  -8 -14   5   78.26    2.60   0
  -7 -13   9   37.53    2.63   0
  -7 -11  11   13.39    2.37   0
  -4 -14   9   73.43    2.67   0
  -3 -15   6   12.29    2.30   0
  -9 -13   3    2.99    2.15   0
  -8 -12   8   21.19    2.33   0
  -8 -10  10    0.43    2.24   0
  -6 -14   8    0.66    2.44   0
  -6 -12  11    3.83    2.23   0
  -7 -17  -6   45.22    2.09   0
  -7 -13   8  277.01    3.85   0
  -5 -15   6   10.75    2.37   0
  -4 -16   3   81.24    2.68   0
  -4 -14   8    3.98    2.28   0
  -3 -15   5    9.26    2.39   0
  -8 -12   7    3.02    2.25   0
  -8 -10   9   53.52    2.58   0
  -7 -11  10    3.16    2.38   0
  -6 -14   7    4.59    2.25   0
  -6 -12  10  190.71    3.20   0
  -7 -13   7  142.71    3.13   0
  -8 -12   6    5.50    2.43   0
  -7 -11   9    5.31    2.54   0
  -6 -14   6   46.60    2.53   0
  -6 -12   9   22.52    2.40   0
  -5 -13   8  152.30    3.06   0
  -4 -16   1    7.00    2.28   0
  -7 -13   6   20.11    2.26   0
  -5 -17  -5  243.06    3.28   0
  -5 -17  -4   35.23    2.23   0
  -8 -12   5    8.58    2.48   0
  -7 -11   8   74.69    3.03   0
  -6 -12   8    2.67    2.38   0
  -5 -17  -6    5.34    1.86   0
  -4 -16   0  237.72    3.36   0
  -8 -10   7   -0.15    2.45   0
  -5 -17  -7    1.51    1.94   0
  -7 -11   7   19.68    2.37   0
  -6 -12   7   22.86    2.35   0
  -8 -10   6   60.57    2.73   0
  -6 -14   3   58.78    2.80   0
  -4 -16  -3   72.93    2.61   0
  -7 -13   3    3.59    2.29   0
  -7 -11   6   19.75    2.28   0
  -6 -12   6   58.24    2.54   0
  -4 -16  -4   16.29    2.52   0
  -8 -12   2   89.00    2.75   0
  -8 -10   5    5.65    2.44   0
  -6 -16  -8  111.28    2.88   0
  -8 -10   4  149.85    3.10   0
  -7 -15  -6   84.95    2.61   0
  -7 -11   5   74.06    2.64   0
  -6 -16 -15    7.29    1.74   0
  -6 -16 -10  157.16    3.09   0
  -6 -16  -9   53.08    2.37   0
  -7 -15  -7    8.45    2.33   0
  -6 -16 -14  148.69    2.50   0
  -6 -16 -13   83.69    2.17   0
  -6 -16 -12    0.32    1.94   0
  -6 -16 -11   41.09    2.24   0
  -6 -14   0   24.11    2.47   0
  -9 -13 -13   -0.07    2.85   0
  -9 -13 -12   37.78    2.89   0
  -9 -13 -11   24.17    2.54   0
  -9  -9   1   -0.51    2.00   0
  -8 -14  -8  127.34    2.59   0
  -8 -10   3   16.00    2.45   0
  -7 -15  -8   10.11    2.25   0
  -7 -11   4    8.61    2.26   0
  -6 -14  -1    6.19    2.29   0
  -5 -15  -3   34.93    2.52   0
  -7 -15 -16   33.75    2.14   0
  -7 -15 -11  116.11    2.79   0
  -7 -15 -10   17.12    2.14   0
  -7 -15  -9    2.14    2.09   0
  -7 -11   3   24.11    2.43   0
  -6 -14  -2   27.39    2.87   0
  -9  -9   0   31.79    2.35   0
  -8 -14 -16    6.65    1.73   0
  -8 -14 -15   26.38    2.49   0
  -8 -14 -12   44.81    2.79   0
  -8 -14 -11    1.82    2.35   0
  -8 -10   2   11.54    2.23   0
  -7 -15 -15   31.82    2.08   0
  -7 -15 -14   27.10    2.25   0
  -7 -15 -13   88.87    2.69   0
  -7 -15 -12   82.02    2.41   0
 -10 -10 -10  235.67    3.19   0
  -8 -14 -14   14.89    2.10   0
  -8 -14 -13  118.26    2.51   0
  -7 -13  -2   68.02    2.64   0
  -7 -11   2  274.59    3.57   0
  -6 -14  -3  283.91    3.59   0
 -10 -10 -11    9.85    2.26   0
  -9  -9  -1    2.17    2.19   0
  -8 -10   1   58.77    2.46   0
  -7 -13  -3   12.62    2.27   0
  -6 -14  -4   22.54    2.42   0
 -10 -10 -14  191.97    3.30   0
 -10 -10 -13   23.39    2.85   0
 -10 -10 -12   -0.56    2.34   0
  -7 -13  -4    9.03    2.66   0
  -7 -11   1    7.99    2.30   0
  -6 -14  -5   37.64    2.67   0
  -5 -15  -9   -3.10    2.70   0
  -5 -15  -8   20.91    2.39   0
  -9  -9  -2    6.80    2.24   0
  -8 -12  -5    1.73    2.23   0
  -8 -10   0  249.02    3.55   0
  -6 -14  -6    9.38    2.49   0
  -5 -15 -10   27.74    2.34   0
  -9  -9  -3   38.76    2.54   0
  -8 -12  -6    7.26    2.23   0
  -8 -10  -1   44.26    2.73   0
  -7 -13  -5   35.34    2.40   0
  -7 -11   0   18.72    2.26   0
  -6 -14  -7    7.79    2.39   0
  -5 -15 -12  100.25    2.68   0
  -5 -15 -11   95.91    2.71   0
  -8 -12  -7   27.59    2.69   0
  -7 -13  -6   13.69    2.21   0
  -6 -14  -8   13.73    2.34   0
  -5 -15 -13  128.75    2.70   0
 -10  -8  -9    5.20    1.96   0
  -9 -11 -11  109.05    3.05   0
  -9  -9  -4   48.67    2.60   0
  -8 -12  -8    9.56    2.68   0
  -8 -10  -2    1.68    2.63   0
  -7 -13  -7    3.61    2.19   0
  -7 -11  -1    4.36    2.10   0
  -6 -14 -22   17.39    1.67   0
  -6 -14  -9   82.21    2.70   0
 -10  -8 -10  104.78    2.41   0
  -9 -11 -19   38.52    2.35   0
  -9 -11 -13   23.60    2.62   0
  -9 -11 -12  248.93    3.18   0
  -9  -9  -5   90.13    2.76   0
  -8 -12  -9   69.81    2.66   0
  -7 -13  -8    4.79    2.18   0
  -7 -11  -2  198.90    3.26   0
  -6 -14 -21   48.77    1.87   0
  -6 -14 -11   26.71    3.05   0
  -6 -14 -10  102.72    2.86   0
  -4 -14  -8   11.17    2.25   0
 -10  -8 -11    3.18    1.89   0
  -9 -11 -18   95.84    2.69   0
  -9 -11 -17   26.33    2.43   0
  -9 -11 -16  215.68    3.09   0
  -9 -11 -15    4.35    2.47   0
  -9 -11 -14    3.20    2.28   0
  -8 -10  -3    5.15    2.45   0
  -7 -13 -22   27.25    2.02   0
  -7 -13 -10    6.62    2.13   0
  -7 -13  -9    2.18    2.09   0
  -6 -14 -20   19.66    1.91   0
  -6 -14 -19   53.78    2.41   0
  -6 -14 -13   46.07    2.94   0
  -6 -14 -12    2.68    2.63   0
  -4 -14  -9   24.08    2.51   0
 -10  -8 -13    3.45    1.98   0
 -10  -8 -12    8.61    2.05   0
  -9  -9  -6   46.05    2.38   0
  -8 -12 -21   53.14    2.06   0
  -8 -10  -4   16.60    2.74   0
  -7 -13 -21   66.47    2.48   0
  -7 -13 -11   14.12    2.52   0
  -7 -11  -3   11.91    2.26   0
  -6 -14 -18    3.09    2.17   0
  -6 -14 -17   11.16    1.96   0
  -6 -14 -16   10.74    2.30   0
  -6 -14 -14   62.27    2.56   0
 -10  -8 -18   31.15    2.80   0
 -10  -8 -17    0.58    2.74   0
 -10  -8 -16   30.28    2.70   0
 -10  -8 -15    6.19    2.34   0
 -10  -8 -14    4.98    1.94   0
  -9  -9  -7   29.27    2.40   0
  -8 -12 -20   10.88    2.00   0
  -8 -12 -19   23.53    2.01   0
  -8 -12 -18    7.42    2.53   0
  -8 -12 -15    4.88    2.87   0
  -8 -12 -14  138.91    2.96   0
  -8 -10  -5   14.46    2.56   0
  -7 -13 -20   10.09    2.21   0
  -7 -13 -19    7.98    2.35   0
  -7 -13 -13   36.36    2.87   0
  -7 -13 -12    1.36    2.53   0
  -7 -11  -4  200.50    3.24   0
  -9  -9  -8  142.17    3.13   0
  -8 -12 -17   25.44    2.20   0
  -8 -12 -16   69.20    2.62   0
  -7 -13 -18   30.35    2.26   0
  -7 -13 -17    8.90    2.29   0
  -7 -13 -16   -0.69    2.48   0
  -6 -12  -5   14.63    2.32   0
  -9  -9  -9    7.59    2.51   0
  -8 -10  -6   40.89    2.59   0
  -7 -11  -5  118.63    2.83   0
  -6 -12  -6   68.52    2.53   0
  -5 -13  -8    1.23    2.16   0
  -9  -9 -10  146.18    3.12   0
  -8 -10  -7  327.84    3.97   0
  -7 -11  -6    4.28    2.24   0
  -6 -12  -7   47.38    2.44   0
  -5 -13  -9   38.25    2.46   0
  -9  -9 -11   81.31    2.74   0
  -9  -7  -6   -0.44    2.15   0
  -8 -10  -8   44.51    2.72   0
  -7 -11  -7   28.10    2.53   0
  -6 -12  -8   34.17    2.25   0
  -5 -13 -10   44.72    2.55   0
 -10  -6 -20    2.55    2.56   0
  -9  -9 -22    5.74    2.56   0
  -9  -7  -7   24.22    2.33   0
  -8 -10  -9  161.66    3.16   0
  -7 -11  -8    4.50    2.27   0
  -6 -12 -26    4.68    1.81   0
  -6 -12  -9   54.91    2.55   0
  -5 -13 -12   67.52    2.44   0
  -5 -13 -11    4.71    2.00   0
 -10  -6 -19   -0.01    2.41   0
 -10  -6 -18    5.00    2.28   0
 -10  -6 -17  114.23    2.74   0
  -9  -9 -21  111.82    2.59   0
  -9  -9 -20    5.15    2.08   0
  -9  -9 -19   20.70    2.33   0
  -9  -9 -18    1.80    2.62   0
  -9  -9 -17    1.28    2.71   0
  -9  -9 -16   10.25    2.46   0
  -9  -9 -15   10.24    2.60   0
  -8 -10 -25   18.45    1.76   0
  -8 -10 -10   67.52    2.69   0
  -7 -11  -9   55.71    2.56   0
  -6 -12 -10    5.42    2.02   0
  -5 -13 -13  102.59    2.83   0
  -9  -7  -8   98.58    2.65   0
  -8 -10 -11    0.30    2.18   0
  -7 -11 -26   38.66    1.79   0
  -7 -11 -10   43.91    2.57   0
  -6 -12 -25   43.36    1.78   0
  -6 -12 -11    1.01    2.28   0
  -5 -13 -19    1.90    2.53   0
  -5 -13 -17   43.96    2.80   0
  -5 -13 -16   15.11    2.31   0
  -5 -13 -15   28.85    2.62   0
  -5 -13 -14    0.47    2.43   0
  -9  -7  -9   44.83    2.64   0
  -8 -10 -23  174.86    2.66   0
  -8 -10 -13   36.49    2.39   0
  -8 -10 -12   18.93    2.33   0
  -8  -8  -6  371.79    3.96   0
  -7 -11 -25    3.74    1.89   0
  -7 -11 -11  167.70    3.33   0
  -6 -12 -24  173.69    2.69   0
  -6 -12 -12    2.34    2.56   0
  -5 -13 -18    2.70    2.22   0
  -9  -7 -10    5.36    2.28   0
  -8 -10 -22   44.10    2.27   0
  -8 -10 -21   36.86    2.30   0
  -8 -10 -15  183.61    3.19   0
  -8 -10 -14  156.66    3.10   0
  -8  -8  -7   46.30    2.43   0
  -7 -11 -24   34.14    2.24   0
  -7 -11 -13  222.21    3.45   0
  -7 -11 -12  176.38    3.25   0
  -6 -12 -23    1.50    1.97   0
  -6 -12 -22  112.19    2.84   0
  -6 -12 -14    9.40    2.59   0
  -6 -12 -13   10.43    2.49   0
  -9  -7 -25   25.34    2.50   0
  -8 -10 -20    1.95    2.46   0
  -8 -10 -19    4.45    2.49   0
  -8 -10 -16   44.40    2.66   0
  -7 -11 -23    3.02    1.95   0
  -7 -11 -22   26.37    2.18   0
  -7 -11 -15   12.57    2.38   0
  -7 -11 -14   56.68    2.51   0
  -6 -12 -20   18.53    2.46   0
  -6 -12 -19   28.74    2.75   0
  -6 -12 -17    3.17    2.50   0
  -6 -12 -16   88.25    3.06   0
  -6 -12 -15    3.06    2.58   0
  -9  -7 -24   43.88    2.63   0
  -9  -7 -12    5.19    2.31   0
  -8  -8  -8   99.48    2.89   0
  -7 -11 -21   22.10    2.34   0
  -7 -11 -19   41.54    2.94   0
  -7 -11 -17  118.87    3.12   0
  -7 -11 -16   49.67    2.49   0
  -9  -7 -23   -1.59    2.22   0
  -9  -7 -14   10.00    2.56   0
  -8  -8 -28   41.09    2.13   0
  -8  -8  -9   25.51    2.33   0
  -6 -10 -30   85.35    1.90   0
  -9  -7 -22    2.19    2.05   0
  -9  -7 -21   30.44    2.28   0
  -9  -7 -20   47.54    2.89   0
  -9  -7 -16    7.09    2.46   0
  -9  -7 -15   48.78    2.62   0
  -8  -8 -10   23.97    2.60   0
  -9  -7 -19  147.16    3.20   0
  -8  -8 -27   25.55    1.85   0
  -8  -8 -11   -0.13    2.50   0
  -7  -9 -29   15.49    1.79   0
  -6 -10 -29    0.10    1.52   0
  -8  -8 -26  174.07    2.62   0
  -8  -8 -12   12.85    2.52   0
  -7  -9 -28  150.08    2.51   0
  -6 -10 -28   43.97    2.20   0
  -5 -11 -27    0.47    1.70   0
  -9  -5 -26   58.98    2.30   0
  -8  -8 -25    0.52    1.97   0
  -8  -8 -24   39.77    2.57   0
  -8  -8 -14    2.22    2.68   0
  -8  -8 -13   11.10    2.58   0
  -7  -9 -27   32.76    2.31   0
  -5 -11 -26   93.14    2.32   0
  -9  -5 -25   58.87    2.41   0
  -9  -5 -14    7.63    2.70   0
  -9  -5 -13  312.93    3.65   0
  -8  -8 -16    7.92    2.41   0
  -8  -8 -15    5.39    2.51   0
  -7  -9 -26    7.29    2.26   0
  -7  -9 -12    0.19    2.17   0
  -6 -10 -27   16.80    2.06   0
  -9  -5 -24    8.62    2.04   0
  -9  -5 -15   56.91    2.72   0
  -8  -8 -20   20.18    3.21   0
  -8  -8 -19   42.96    2.94   0
  -8  -8 -18   45.55    2.81   0
  -8  -8 -17  128.43    3.08   0
  -7  -9 -25    2.42    2.24   0
  -7  -9 -14    4.11    2.27   0
  -7  -9 -13   86.52    2.76   0
  -6 -10 -26  130.39    2.48   0
  -6 -10 -14   75.65    2.71   0
  -5 -11 -23    2.56    2.22   0
  -5 -11 -22  113.59    3.40   0
  -5 -11 -17   86.19    2.65   0
  -9  -5 -23   19.33    2.29   0
  -9  -5 -22   91.74    2.83   0
  -9  -5 -21   26.86    3.03   0
  -9  -5 -18   32.74    3.52   0
  -9  -5 -16    4.39    2.56   0
  -8  -6 -29   26.04    2.05   0
  -7  -9 -16   48.91    2.68   0
  -7  -9 -15   38.71    2.53   0
  -6 -10 -24    8.58    2.50   0
  -6 -10 -15  242.29    3.44   0
  -5 -11 -21    4.70    2.34   0
  -5 -11 -20  143.03    3.02   0
  -5 -11 -19   75.19    2.62   0
  -5  -9 -32   -0.65    1.44   0
  -9  -3 -27   28.47    2.56   0
  -7  -9 -22    6.89    2.33   0
  -7  -9 -21   53.82    2.71   0
  -7  -9 -20   36.35    2.62   0
  -7  -9 -19    4.25    2.60   0
  -7  -9 -18    3.83    2.54   0
  -7  -9 -17   57.33    2.80   0
  -7  -7 -31   27.54    1.80   0
  -6 -10 -23  156.40    3.39   0
  -6 -10 -22   44.96    2.55   0
  -6 -10 -21    2.56    2.44   0
  -6 -10 -20   49.23    2.96   0
  -6 -10 -19   -2.23    2.70   0
  -6 -10 -18   60.24    2.86   0
  -6 -10 -17  193.66    3.24   0
  -6 -10 -16    5.26    2.13   0
  -6  -8 -32   72.36    1.79   0
  -9  -3 -26   29.77    2.44   0
  -8  -6 -28    3.27    1.88   0
  -8  -6 -12    0.90    2.38   0
  -5  -9 -31   14.02    1.62   0
  -9  -3 -25   31.48    2.21   0
  -8  -6 -27   89.44    2.29   0
  -8  -6 -13    2.67    2.25   0
  -7  -7 -30  159.27    2.46   0
  -6  -8 -31    9.45    1.92   0
  -9  -3 -24    5.16    2.11   0
  -8  -6 -26   10.85    2.13   0
  -8  -6 -25   17.41    2.74   0
  -8  -6 -14   22.13    2.38   0
  -8  -4 -31   26.17    1.98   0
  -7  -7 -29   32.11    1.90   0
  -6  -8 -30  139.23    2.59   0
  -5  -9 -30  261.31    2.93   0
  -9  -3 -23   47.65    2.49   0
  -9  -3 -22   21.29    2.71   0
  -9  -3 -19   52.91    2.75   0
  -9  -1 -27   27.17    2.13   0
  -8  -6 -17  373.62    4.43   0
  -8  -6 -16    6.16    2.61   0
  -7  -7 -28  114.01    2.78   0
  -5  -7 -35   38.15    1.58   0
  -8  -6 -22   13.20    2.70   0
  -8  -6 -21  213.92    3.84   0
  -8  -6 -20   63.42    3.27   0
  -8  -6 -19   22.00    2.96   0
  -8  -6 -18   52.83    3.19   0
  -7  -7 -27    6.94    2.00   0
  -7  -5 -33    1.99    1.65   0
  -6  -8 -29    8.28    1.94   0
  -8  -4 -29    7.04    1.93   0
  -6  -6 -34    2.98    1.68   0
  -5  -9 -27    1.54    2.17   0
  -5  -7 -34   31.28    1.97   0
  -4 -10 -22    8.24    2.37   0
  -8  -4 -28   23.21    1.99   0
  -7  -7 -25   13.60    2.20   0
  -7  -7 -24   39.09    2.45   0
  -7  -7 -17   45.94    2.67   0
  -7  -7 -16   36.77    2.65   0
  -7  -5 -32    1.40    1.79   0
  -6  -8 -27    0.56    2.53   0
  -5  -9 -26    0.24    2.07   0
  -8  -4 -27   11.89    2.07   0
  -8  -2 -31    4.24    2.14   0
  -7  -7 -23   28.78    2.49   0
  -7  -7 -22   94.02    3.20   0
  -7  -7 -21    4.61    2.63   0
  -7  -7 -20    9.25    2.55   0
  -7  -7 -19  474.11    4.82   0
  -7  -7 -18   -0.76    2.32   0
  -6  -8 -26  391.63    3.91   0
  -6  -8 -25   16.49    2.46   0
  -6  -6 -33   38.10    2.05   0
  -5  -9 -25    2.93    2.22   0
  -5  -9 -24   12.07    2.45   0
  -5  -7 -33    6.32    2.06   0
  -8  -4 -26   90.55    2.66   0
  -8  -4 -15  138.16    3.12   0
  -7  -3 -34    6.33    2.12   0
  -6  -8 -24   71.20    2.74   0
  -6  -8 -23   75.44    2.81   0
  -6  -8 -22    0.81    2.45   0
  -6  -8 -21   65.67    2.85   0
  -6  -8 -20    1.00    2.41   0
  -6  -8 -19   34.90    2.78   0
  -6  -4 -36   18.32    1.45   0
  -5  -9 -23   10.81    2.40   0
  -5  -9 -21    7.81    2.48   0
  -5  -9 -20   17.08    2.54   0
  -8  -4 -24  124.83    3.27   0
  -8  -4 -16  100.25    2.91   0
  -8  -2 -30   16.49    2.03   0
  -7  -5 -30   19.80    2.03   0
  -6  -6 -32   31.87    1.94   0
  -5  -7 -32   11.63    1.85   0
  -8  -4 -22   24.29    2.87   0
  -8  -4 -21  152.72    3.84   0
  -8  -4 -20   17.44    3.19   0
  -8  -4 -19   -1.02    2.66   0
  -8  -4 -18   55.69    2.84   0
  -8  -2 -29    2.93    1.94   0
  -7  -5 -29   26.80    2.23   0
  -7  -3 -33   45.74    2.15   0
  -6  -6 -31    8.62    1.97   0
  -5  -5 -36    6.18    1.76   0
  -4  -6 -36   20.70    1.52   0
  -8  -2 -28    1.27    1.79   0
  -8   0 -31   -3.60    2.09   0
  -6  -4 -35   -1.24    1.77   0
  -8  -2 -27   14.02    2.03   0
  -8   0 -30   13.62    2.07   0
  -7  -5 -27    9.50    2.20   0
  -7  -3 -32    3.03    1.80   0
  -5  -7 -30  141.44    2.75   0
  -4  -8 -29    9.51    2.04   0
  -7  -5 -26   26.35    2.28   0
  -7  -5 -25   13.14    2.34   0
  -6  -6 -29   82.35    2.82   0
  -6  -4 -34   55.57    2.13   0
  -5  -7 -29   52.96    2.58   0
  -5  -5 -35   83.11    2.10   0
  -4  -8 -28  136.69    2.87   0
  -4  -6 -35   95.04    1.96   0
  -8  -2 -25  218.93    3.38   0
  -8  -2 -24    4.91    2.43   0
  -8  -2 -17    4.22    2.37   0
  -8   0 -29   -0.01    1.82   0
  -8   2 -30   17.70    2.09   0
  -7  -5 -24    4.09    2.44   0
  -7  -5 -23  262.80    4.08   0
  -7  -5 -22    2.31    2.69   0
  -7  -5 -21    8.96    2.42   0
  -7  -5 -20   58.56    2.78   0
  -7  -5 -19  480.14    4.92   0
  -7  -3 -31   80.86    2.42   0
  -7  -1 -34   16.27    2.08   0
  -6  -6 -28   42.92    2.58   0
  -6  -6 -27   31.60    2.20   0
  -4  -8 -27    6.24    2.26   0
  -4  -4 -38    6.91    1.67   0
  -8  -2 -23   75.75    2.98   0
  -8  -2 -22   -1.25    2.75   0
  -8  -2 -21    4.39    3.11   0
  -8  -2 -20    4.55    2.91   0
  -8  -2 -19    3.32    2.48   0
  -8  -2 -18   55.01    2.50   0
  -8   0 -28   35.94    2.35   0
  -7  -3 -30   94.43    2.57   0
  -6  -6 -26    6.21    2.31   0
  -6  -4 -33    0.34    1.76   0
  -6  -2 -36   28.63    1.77   0
  -5  -5 -34    0.62    1.88   0
  -4  -8 -26  199.87    3.18   0
  -4  -8 -25   95.91    2.91   0
  -4  -6 -34    9.17    1.80   0
  -8   0 -27    2.62    2.07   0
  -8   2 -29    2.43    1.69   0
  -7  -1 -33    1.34    1.74   0
  -6  -6 -25   11.37    2.34   0
  -6  -6 -24   11.12    2.38   0
  -6  -6 -23   81.85    2.89   0
  -6  -4 -32   41.22    2.23   0
  -5  -7 -26    7.14    2.42   0
  -5  -7 -25   11.62    2.50   0
  -5  -3 -37   41.22    1.82   0
  -7  -3 -28  165.94    3.25   0
  -7  -1 -32  130.53    2.67   0
  -7   1 -34   12.75    2.08   0
  -6  -6 -22   56.72    2.96   0
  -6  -2 -35   26.01    2.14   0
  -5  -7 -23   18.25    2.48   0
  -4  -4 -37  194.39    2.51   0
  -8   0 -25    1.76    2.19   0
  -8   0 -24  159.47    3.23   0
  -8   0 -23    5.18    2.65   0
  -7  -3 -27  120.99    3.09   0
  -4  -6 -32   22.88    2.23   0
  -8   0 -22  246.83    3.82   0
  -7  -3 -26   17.99    2.41   0
  -7  -3 -25   -2.74    2.46   0
  -7  -1 -31   30.20    2.05   0
  -7   1 -33   -1.84    1.99   0
  -6  -4 -30    8.26    2.19   0
  -6  -2 -34   35.73    2.22   0
  -5  -3 -36   12.78    1.69   0
  -7  -3 -24  124.99    3.38   0
  -7  -3 -23  262.02    4.14   0
  -7  -3 -22   22.72    2.89   0
  -7  -1 -30    8.05    2.29   0
  -6  -4 -29    7.29    2.07   0
  -6   0 -36    7.37    1.79   0
  -5  -5 -31   55.57    2.35   0
  -5  -1 -38    4.20    1.70   0
  -4  -6 -31    8.21    2.15   0
  -4  -4 -36   29.73    2.14   0
  -4  -2 -39    3.11    1.42   0
  -3  -3 -39   25.48    1.41   0
  -7  -3 -21   30.13    2.67   0
  -7   1 -32  132.83    2.47   0
  -7   3 -33   38.39    2.19   0
  -6  -4 -28   31.07    2.40   0
  -6  -2 -33  117.79    2.66   0
  -5  -5 -30   76.13    2.63   0
  -5  -3 -35   48.30    2.07   0
  -4  -6 -30   23.57    2.18   0
  -7  -1 -28   11.36    2.84   0
  -6  -4 -26  298.69    4.21   0
  -6   0 -35    0.51    2.12   0
  -5  -5 -29   13.77    2.62   0
  -4  -6 -29   -0.51    2.27   0
  -4  -4 -35   14.64    1.96   0
  -7   1 -31   29.23    1.91   0
  -7   3 -32    3.96    1.66   0
  -6  -4 -25   25.58    2.51   0
  -6   2 -36   27.97    2.47   0
  -5  -5 -28   19.05    2.53   0
  -5  -1 -37   11.41    1.84   0
  -4  -6 -28   33.44    2.34   0
  -4  -2 -38   -1.92    1.77   0
  -3  -5 -34    0.80    1.74   0
  -3  -3 -38   19.13    1.58   0
  -7  -1 -26   28.08    2.65   0
  -7   1 -30    9.71    1.99   0
  -6  -4 -23    1.54    2.34   0
  -6  -2 -31   19.65    2.25   0
  -6   0 -34  239.98    3.05   0
  -5  -5 -27    5.40    2.03   0
  -5  -5 -26   35.54    2.34   0
  -3  -1 -40   75.35    2.00   0
  -7  -1 -25   15.88    2.72   0
  -7   3 -31   82.49    2.19   0
  -6  -2 -30  110.31    2.70   0
  -5  -5 -25   13.50    2.09   0
  -5  -1 -36   51.87    2.05   0
  -5   1 -38    9.16    1.59   0
  -4  -2 -37   43.76    1.86   0
  -7  -1 -23   71.86    2.89   0
  -7  -1 -22   13.77    2.71   0
  -7  -1 -21   37.22    2.89   0
  -7   1 -28   12.04    2.17   0
  -6  -2 -29    2.81    2.12   0
  -6   0 -33    0.93    2.07   0
  -6   2 -35   27.16    2.00   0
  -4  -4 -33   44.69    2.33   0
  -4   0 -39   -0.87    1.63   0
  -3  -3 -37   42.92    2.01   0
  -7   1 -27  111.35    2.85   0
  -6  -2 -28   33.81    2.40   0
  -6   4 -35   -2.79    1.87   0
  -5  -1 -35  105.32    2.35   0
  -5   1 -37    9.53    2.09   0
  -5   3 -38   55.41    2.36   0
  -4  -2 -36   -0.44    2.20   0
  -7   1 -26   32.12    2.45   0
  -7   3 -29   13.89    1.90   0
  -6  -2 -27  220.77    3.48   0
  -6   2 -34   35.68    2.04   0
  -5  -3 -30  319.93    3.84   0
  -4  -4 -31    0.61    2.34   0
  -3  -5 -31    4.36    2.09   0
  -3  -1 -39    0.68    1.62   0
  -7   1 -25   13.29    2.54   0
  -7   1 -24  110.19    3.08   0
  -6  -2 -26  108.40    2.96   0
  -6   0 -31    0.67    2.33   0
  -6   6 -34    0.77    1.79   0
  -5  -3 -29   57.63    2.52   0
  -4   0 -38   14.71    1.82   0
  -3  -5 -30   33.47    2.19   0
  -7   1 -23   68.05    3.00   0
  -7   1 -22   11.69    2.46   0
  -6  -2 -24    8.82    2.37   0
  -6   0 -30  159.89    3.18   0
  -6   2 -33  117.67    2.51   0
  -6   4 -34   57.34    2.07   0
  -5  -3 -28  175.72    3.22   0
  -5   1 -36   52.40    2.05   0
  -5   3 -37   38.23    2.14   0
  -4  -4 -30   18.53    2.38   0
  -4   2 -39    2.43    1.93   0
  -3  -5 -29   18.71    2.24   0
  -2  -2 -38    3.46    1.46   0
  -7   3 -26   16.62    2.16   0
  -7   3 -25    5.75    2.21   0
  -6   6 -33   32.45    2.23   0
  -5  -3 -27   27.58    2.28   0
  -5  -1 -33   21.47    2.06   0
  -5   5 -37   39.27    2.23   0
  -4  -4 -29    4.85    2.10   0
  -4  -2 -34    1.24    2.04   0
  -4   0 -37   -3.59    1.81   0
  -3  -1 -38   11.47    1.82   0
  -3   1 -40   78.54    1.96   0
  -2   0 -40   31.73    1.91   0
  -6   0 -29    3.31    2.23   0
  -6   4 -33    1.22    1.84   0
  -5   1 -35  103.37    2.46   0
  -4  -4 -28  115.35    2.76   0
  -3  -3 -34   29.79    2.38   0
  -6   0 -28    4.49    2.37   0
  -6   0 -27   -3.12    2.92   0
  -6   2 -31   19.98    2.66   0
  -6   4 -32   41.10    2.46   0
  -6   6 -32   33.33    2.02   0
  -5  -1 -31   61.73    2.44   0
  -5   3 -36   13.13    1.94   0
  -4  -2 -33  329.17    3.81   0
  -4   2 -38    0.39    1.76   0
  -4   4 -39    7.17    1.84   0
  -3  -1 -37   13.85    1.96   0
  -2  -2 -37   16.90    1.85   0
  -2   2 -41   28.01    1.76   0
  -6   0 -26   11.64    2.38   0
  -5   5 -36    0.77    1.90   0
  -3  -3 -33   13.72    2.11   0
  -3   1 -39    5.24    1.77   0
  -6   0 -25    3.08    2.18   0
  -6   6 -31    2.62    2.08   0
  -5  -1 -30   44.92    2.51   0
  -5   1 -33   24.18    2.59   0
  -5   3 -35   50.22    2.18   0
  -4  -2 -32  221.37    3.45   0
  -3  -3 -32  178.91    3.06   0
  -3   3 -40   12.13    1.73   0
  -2  -2 -36   15.63    1.91   0
  -2   0 -39    1.78    1.63   0
  -5  -1 -29   96.47    2.77   0
  -5   7 -35   37.79    2.18   0
  -4  -2 -31    4.84    2.13   0
  -4   0 -35   -4.97    2.27   0
  -4   2 -37   43.27    2.02   0
  -4   4 -38    3.22    1.66   0
  -4   6 -38   22.44    2.24   0
  -3   1 -38   13.73    2.07   0
  -6   2 -28   29.51    2.68   0
  -6   4 -30    7.87    2.38   0
  -6   6 -30    9.97    1.77   0
  -5  -1 -28  106.04    2.91   0
  -5   1 -32   72.57    2.52   0
  -5   3 -34   54.47    2.57   0
  -5   5 -35   81.92    2.12   0
  -4  -2 -30    5.17    1.98   0
  -4   0 -34  157.64    2.96   0
  -3  -3 -31  172.11    3.03   0
  -3  -1 -35   30.29    2.97   0
  -2  -2 -35  179.49    2.91   0
  -2   0 -38   61.48    2.24   0
  -2   2 -40   26.54    1.72   0
  -1   1 -40   55.10    1.70   0
  -6   2 -27  220.47    3.66   0
  -6   2 -26  103.16    3.11   0
  -5  -1 -27   57.67    2.48   0
  -5   1 -31   55.79    2.91   0
  -5   7 -34   29.03    2.16   0
  -4  -2 -29   81.04    2.51   0
  -3  -3 -30  175.41    3.18   0
  -3   3 -39   34.71    1.88   0
  -1   3 -41    7.16    1.56   0
  -6   2 -25  158.60    3.08   0
  -6   4 -28   29.19    2.45   0
  -5   3 -33   -0.66    2.49   0
  -4   0 -33   -1.73    1.97   0
  -4   4 -37  188.59    2.54   0
  -4   6 -37  245.29    3.10   0
  -3  -1 -34   83.54    2.71   0
  -3   1 -37   14.37    2.17   0
  -2  -2 -34    1.96    1.90   0
  -6   4 -27   15.68    2.36   0
  -3   5 -39  368.80    2.97   0
  -2   2 -39    2.38    1.74   0
  -1   1 -39    1.88    1.83   0
  -6   4 -26  296.26    3.90   0
  -5   3 -32   18.42    2.32   0
  -5   5 -33   32.31    2.19   0
  -5   7 -33    5.64    1.96   0
  -4   0 -32   94.35    2.68   0
  -4   4 -36   29.52    2.10   0
  -4   8 -36    7.27    1.95   0
  -3  -1 -33   18.74    2.39   0
  -3   1 -36   15.73    2.18   0
  -3   3 -38   23.69    1.80   0
  -2  -2 -33  127.69    2.83   0
  -2   4 -40   14.96    1.62   0
  -6   4 -25   25.24    2.52   0
  -5   1 -28  109.99    2.81   0
  -5   3 -31   70.66    2.72   0
  -4   0 -31    1.22    2.07   0
  -4   2 -34    2.04    1.95   0
  -4   6 -36   28.78    1.85   0
  -2   0 -36  163.18    3.33   0
  -2   6 -40   14.98    1.55   0
  -1   3 -40    9.78    1.75   0
  -6   4 -24   50.08    2.61   0
  -5   1 -27   55.76    2.46   0
  -5   7 -32   11.10    2.11   0
  -3  -1 -32   56.86    2.57   0
  -3   1 -35   31.24    2.34   0
  -3   3 -37   49.04    2.08   0
  -3   5 -38    6.74    1.94   0
  -3   7 -38   33.27    2.03   0
  -2  -2 -32   19.49    2.23   0
  -2   2 -38    3.65    1.80   0
  -1   1 -38    0.77    2.07   0
  -5   3 -30  329.85    4.04   0
  -4   0 -30  152.95    3.11   0
  -4   2 -33  334.19    3.72   0
  -4   8 -35    1.47    1.91   0
  -3  -1 -31   25.76    2.38   0
  -2  -2 -31    2.49    2.27   0
  -2   4 -39   31.64    1.83   0
  -5   7 -31    8.98    1.84   0
  -4   0 -29    1.51    2.03   0
  -4   4 -34  107.08    2.89   0
  -3   1 -34   80.19    2.69   0
  -2   0 -35    2.02    2.06   0
  -1   5 -40   25.93    1.99   0
  -4   2 -32  215.51    3.39   0
  -4   8 -34    9.61    2.08   0
  -4  10 -33   18.67    1.96   0
  -3   5 -37    3.28    1.89   0
  -3   7 -37    0.85    1.79   0
  -2   6 -39    6.53    1.63   0
  -1   1 -37   11.34    2.01   0
  -1   3 -39   -2.05    1.90   0
   0   4 -40   24.59    1.80   0
  -5   5 -29   14.21    2.38   0
  -4   2 -31    6.56    2.16   0
  -4   4 -33   43.66    2.25   0
  -4   6 -34   10.44    2.12   0
  -3   1 -33   15.78    2.16   0
  -3   9 -36   21.34    2.46   0
  -2   0 -34  152.35    3.16   0
  -2   4 -38   13.25    1.93   0
  -3   3 -35  178.25    2.90   0
  -3   5 -36   22.16    2.18   0
  -2   2 -36   19.55    2.46   0
  -1  -1 -33    3.32    1.81   0
  -2  12  32    0.87    1.85   0
  -1  13  28    2.95    1.85   0
   0  12  32   65.52    2.16   0
   1   9  38   60.90    1.73   0
   2  10  34    0.55    1.71   0
   2  12  20   67.83    2.73   0
   2  12  21    7.92    2.37   0
   2  12  24   62.96    2.83   0
   2  12  25   56.69    2.56   0
   3   9  33   46.17    1.89   0
   3  11  21    4.80    2.27   0
   3  11  23    2.79    2.34   0
   3  11  24    1.08    2.42   0
   4   8  30   75.08    2.34   0
  -1  13  26    7.27    2.12   0
   0  10  37   39.82    1.94   0
   0  12  31   -0.84    1.87   0
   1  11  33   71.79    2.24   0
   2  10  33   28.44    2.09   0
   3   7  36   23.69    1.65   0
   4   8  29   12.26    2.12   0
  -2  12  31   -0.21    1.86   0
  -1  11  35   64.86    2.13   0
  -1  13  22  118.15    3.09   0
  -1  13  23   90.00    3.04   0
  -1  13  24    7.40    2.14   0
  -1  13  25   47.14    2.35   0
   1  11  32  224.05    3.14   0
   2   8  37   34.13    1.86   0
   4   8  27    6.12    2.17   0
   4   8  28  134.32    2.74   0
   1   9  37   42.97    1.71   0
   2   6  39    6.70    1.63   0
   3   7  35   71.30    1.99   0
   3   9  30   86.03    2.81   0
   4   8  26  195.08    3.24   0
  -2  12  30  163.58    2.39   0
  -1  11  34   12.10    1.83   0
   0  10  36   16.93    1.86   0
   0  12  28   53.38    2.51   0
   0  12  29   59.39    2.62   0
   2   8  36   10.53    1.73   0
   2  10  31   -1.59    2.42   0
   3   9  29   12.61    2.28   0
  -2  10  36   10.93    2.30   0
  -2  12  29    5.84    1.84   0
  -1  11  33   27.32    2.08   0
   0  12  27   -0.48    2.14   0
   1   9  36   -0.62    1.75   0
   1  11  30   25.79    2.23   0
   2  10  30   53.35    2.22   0
   3   7  34    5.81    1.72   0
   3   9  28   51.19    2.65   0
  -1   9  38    9.14    2.01   0
   0   8  39   22.04    1.69   0
   0  10  35  163.45    2.37   0
   0  12  25   33.19    2.64   0
   1   7  39   79.71    1.95   0
   1  11  29    0.59    1.96   0
   2   6  38    6.73    1.71   0
   2   8  35    0.51    1.74   0
   2  10  29  108.61    2.64   0
   3   9  27   42.68    2.59   0
  -2  12  27   46.72    2.26   0
  -1  11  32  258.67    3.00   0
   0  10  34   91.17    2.31   0
   0  12  23  113.89    3.14   0
   1   9  35    3.42    1.80   0
   1  11  27   41.14    2.40   0
   1  11  28    1.63    2.12   0
   2  10  27    9.71    2.58   0
   2  10  28   24.60    2.32   0
  -2  10  35   64.10    2.01   0
  -1   9  37   18.00    2.15   0
   0   8  38    1.89    1.96   0
   1  11  25   14.98    2.23   0
   2  10  25   17.43    2.25   0
   3   7  32    0.50    2.18   0
  -1  11  30   47.05    2.81   0
   1   7  38    1.16    1.70   0
   1  11  23   38.81    2.41   0
   1  11  24    1.51    2.24   0
   2   4  39   23.70    1.65   0
   2   6  37  233.72    2.79   0
   2  10  24   56.52    2.64   0
   3   7  31    9.04    2.05   0
  -3   9  36   57.73    2.21   0
  -2  10  34  189.65    2.61   0
  -1   7  40    5.55    1.93   0
  -1  11  29    4.97    2.70   0
   1   5  40   20.95    1.46   0
   1   9  33  143.87    3.13   0
   3   7  30  177.80    2.96   0
  -2   8  38   62.89    2.54   0
  -2  10  33    0.71    2.20   0
  -1   9  36   23.65    1.85   0
  -1  11  28   11.19    2.17   0
   0   6  40    3.27    1.64   0
   0   8  37    3.81    1.72   0
   1   7  37   -0.39    1.68   0
   1   9  32   33.40    2.42   0
   2   6  36   42.43    1.87   0
   2   8  32   89.53    2.54   0
   3   5  34   -1.01    1.73   0
  -3   9  35    6.15    1.93   0
  -1  11  27   18.72    2.34   0
   2   4  38   13.63    1.76   0
   2   8  31   25.16    2.45   0
   3   5  33    3.79    2.09   0
   3   7  28   78.71    2.36   0
  -1   7  39   75.78    1.81   0
  -1   9  35    6.77    1.90   0
  -1  11  25   30.14    2.27   0
  -1  11  26   18.04    2.23   0
   0   8  36   33.08    2.03   0
   0  10  30  108.11    2.53   0
   1   5  39  188.89    2.47   0
   1   7  36    4.42    1.91   0
   1   9  31   22.76    2.13   0
   2   8  30   20.49    2.60   0
   3   7  27   65.17    2.47   0
  -3   9  34    2.93    2.01   0
  -2   8  37    1.01    1.80   0
  -1  11  24   34.93    2.31   0
   0   6  39   11.77    1.70   0
   0  10  28    6.22    2.13   0
   0  10  29   22.25    2.19   0
   1   9  30    7.01    2.13   0
   3   5  32   69.14    2.19   0
  -4   8  35    2.16    1.93   0
  -2   6  40    1.04    1.83   0
  -1   5  41    9.81    1.52   0
  -1   7  38    4.28    1.77   0
   0   4  41   42.52    1.52   0
   0  10  27   21.17    2.11   0
   1   9  28    2.89    2.54   0
   1   9  29   47.88    2.39   0
   2   4  37  120.16    2.18   0
   2   6  34    4.48    1.94   0
   2   8  28   47.92    2.50   0
   3   5  31    6.15    1.71   0
  -3   7  38    2.23    1.96   0
  -3   9  33   20.45    1.97   0
  -2   8  36   12.36    2.02   0
  -2  10  30  134.53    2.89   0
  -1   9  33   98.74    2.65   0
   0   8  34    5.58    2.62   0
   0  10  25   32.69    2.43   0
   0  10  26    4.39    2.32   0
   1   3  40    4.67    1.58   0
   1   5  38   94.65    2.13   0
   1   9  27    1.38    2.14   0
   2   6  33    6.48    2.02   0
   2   8  27   43.09    2.48   0
  -2  10  29  105.98    2.65   0
  -1   9  32   56.66    2.42   0
   0   6  38   19.84    1.80   0
   1   7  34   12.81    2.19   0
   3   5  30   33.94    2.02   0
  -4   8  34   10.83    1.66   0
  -2   6  39    1.75    1.73   0
  -2   8  35    9.33    1.90   0
  -2  10  28   -2.57    2.16   0
  -1   7  37    5.47    1.86   0
  -1   9  31   20.36    2.72   0
   0   4  40   21.52    1.78   0
   0   8  33    1.10    2.19   0
   1   5  37    5.73    1.87   0
   1   7  33    8.95    2.18   0
   2   6  32   23.94    2.32   0
   3   5  29   17.52    1.98   0
  -2  10  26   35.56    2.38   0
   0   6  37  102.52    2.27   0
   0   8  32   24.25    2.16   0
   1   3  39    0.38    1.60   0
   1   7  32   10.16    2.48   0
   2   6  31    8.98    2.24   0
  -4   8  33   -0.28    1.62   0
  -2   4  41   25.51    1.82   0
  -2  10  25   39.39    2.34   0
  -1   7  36   -0.60    2.02   0
  -1   9  30    5.75    2.35   0
   0   2  41   11.24    1.52   0
  -4   6  37  211.68    2.81   0
  -3   9  30   40.10    2.27   0
  -2   6  38   -0.27    1.83   0
  -1   3  41    7.78    1.82   0
  -1   5  39  166.72    2.41   0
  -1   9  29    6.74    2.41   0
   0   4  39   43.43    2.03   0
   0   8  31   28.44    2.32   0
   1   3  38   65.33    2.14   0
   1   7  31   26.99    2.20   0
   2   4  34  134.22    2.60   0
   2   6  29    2.12    2.36   0
  -3   5  39  183.71    2.80   0
  -3   9  29    0.62    2.04   0
  -2   8  33    2.60    2.23   0
  -1   7  35    2.39    2.34   0
  -1   9  27   12.14    2.12   0
  -1   9  28   41.38    2.51   0
   0   8  30    7.73    2.16   0
   1   5  35    1.18    2.29   0
   1   7  30   38.62    2.34   0
   2   4  33   69.79    2.87   0
  -3   7  35    5.47    1.90   0
  -3   9  28  119.51    2.74   0
  -2   4  40    7.53    1.78   0
  -2   6  37   93.15    2.34   0
  -2   8  32    4.75    2.15   0
  -1   5  38   91.26    2.30   0
   0   2  40   36.16    1.99   0
   0   4  38   32.40    2.40   0
   0   6  35   34.98    2.19   0
   0   8  29   15.07    2.18   0
   1   1  39    2.57    1.31   0
   1   7  29  201.35    3.25   0
  -3   9  27   10.31    2.30   0
   0   0  41    1.56    1.29   0
   0   6  34    6.24    1.92   0
   0   8  28   41.09    2.35   0
   1   5  34   16.63    2.19   0
   2   4  32   65.15    2.40   0
  -5   5  36    6.48    1.95   0
  -4   4  39    0.80    1.78   0
  -3   5  38   25.19    1.83   0
  -1   3  40   72.16    1.99   0
  -1   7  33    1.82    2.05   0
   1   5  33    5.00    2.31   0
   2   4  31    2.06    2.29   0
  -2   2  41    7.54    1.94   0
  -2   4  39   13.11    1.85   0
  -1   1  41   12.08    1.97   0
  -1   7  32    7.43    2.24   0
   0   2  39    0.09    2.14   0
   0   6  33   91.52    2.73   0
   1   1  38   -0.03    1.55   0
   1   3  36    0.48    2.21   0
  -3   3  40  143.08    2.33   0
  -3   7  33   39.80    2.22   0
  -2   6  35  275.07    3.47   0
  -2   8  29   18.77    2.50   0
  -1   3  39    5.34    1.85   0
   0   0  40   84.54    2.10   0
   0   6  32    0.88    2.04   0
   1   5  32   77.27    2.72   0
  -5   5  35   84.25    1.95   0
  -4   4  38   54.51    2.22   0
  -4   6  34    8.79    2.02   0
  -3   7  32   -0.19    2.14   0
  -2   8  28   65.85    2.49   0
  -1   5  36   20.39    2.05   0
   0   4  36  140.96    2.79   0
   1   3  35   55.37    2.43   0
   1   5  31    9.93    2.06   0
  -4   2  40    1.06    1.92   0
  -3   1  41   21.13    1.98   0
  -2   4  38  120.02    2.55   0
  -2   6  34    6.84    2.29   0
  -2   8  27   29.00    2.40   0
  -1   5  35    2.67    1.96   0
  -1   7  30   46.53    2.44   0
   0   6  31    3.56    2.07   0
  -3   3  39   14.54    1.94   0
  -3   5  36    1.79    2.05   0
  -3   7  31  123.72    2.80   0
  -2   2  40    2.40    1.73   0
  -1  -1  41   13.62    1.54   0
  -1   1  40    4.59    1.77   0
  -1   7  29   51.98    2.42   0
   0   0  39    1.15    1.96   0
   0   4  35   65.98    2.63   0
   0   6  30    5.03    1.95   0
   1   3  34   18.69    2.25   0
  -4   4  37   54.85    2.06   0
  -3   7  30   23.73    2.27   0
  -2   0  41    0.30    1.52   0
  -2   6  33   49.59    2.33   0
   0   2  37   10.92    2.06   0
   0   4  34   88.33    2.71   0
   1   1  36    5.27    1.93   0
   1   3  33   59.32    2.62   0
  -5   3  37    9.59    1.78   0
  -4   2  39   10.88    2.00   0
  -4   6  32    4.37    2.13   0
  -3   5  35   15.15    2.65   0
  -3   7  29   32.77    2.37   0
  -2   2  39    8.50    2.18   0
  -2   6  32    0.34    2.16   0
  -1   3  37   22.80    2.28   0
  -5   5  33   12.19    1.83   0
  -4   4  36   58.42    2.16   0
  -3   1  40    4.14    1.79   0
  -3   3  38   43.50    2.07   0
  -2   4  36   73.02    2.44   0
  -1  -1  40    6.53    1.93   0
  -1   1  39    3.55    1.79   0
  -1   5  33   34.24    2.35   0
   0   4  33   13.98    2.20   0
   1   1  35   15.40    2.03   0
   1   3  32   49.97    2.24   0
  -6   2  36    8.08    1.77   0
  -4   6  31    0.47    2.09   0
  -3  -1  41   16.90    1.60   0
  -3   5  34   35.25    2.33   0
  -2  -2  41    9.36    1.45   0
  -2   0  40   -0.11    1.97   0
  -2   6  31   57.81    2.57   0
  -1   3  36    2.61    2.08   0
  -1   5  32   87.53    2.69   0
   0   2  36   17.61    2.21   0
  -5   3  36   -1.82    1.77   0
  -4   0  40   30.74    1.95   0
  -4   2  38   22.13    1.90   0
  -3   3  37    8.68    2.10   0
  -2   2  38   42.63    2.23   0
  -2   4  35   23.21    2.13   0
  -2   6  30    2.92    2.21   0
  -1  -3  40   64.17    1.93   0
   1   1  34   22.07    2.14   0
  -5   1  38   55.36    2.26   0
  -3   1  39    1.39    1.69   0
  -3   5  33  230.37    3.31   0
  -2   6  29  131.39    3.05   0
  -1   3  35   23.27    2.10   0
  -1   5  31  116.72    2.82   0
   0   0  37    0.42    2.14   0
   0   2  35   77.39    2.70   0
   0   4  31    1.34    1.88   0
  -6   2  35    4.73    1.76   0
  -5   3  35   27.47    2.03   0
  -4   4  34   96.94    2.99   0
  -3  -1  40    3.45    1.92   0
  -2   0  39   -0.49    2.15   0
  -2   4  34   62.53    2.56   0
  -1  -1  39    5.83    1.77   0
   1   1  33    0.81    2.06   0
  -5  -1  39   -2.07    1.97   0
  -4   0  39    0.23    1.74   0
  -4   2  37    7.00    2.05   0
  -4   6  28    6.90    1.96   0
  -2  -2  40    3.18    1.89   0
  -1   1  37    3.28    2.27   0
  -1   3  34   21.01    2.31   0
   0   0  36  123.39    3.08   0
   0   2  34   46.00    2.52   0
  -5   1  37    2.99    2.03   0
  -5   3  34   28.82    2.43   0
  -4  -2  40    6.70    1.72   0
  -3   1  38  118.15    2.78   0
  -3   5  31   35.29    2.74   0
  -2  -4  40    2.83    1.84   0
  -2   4  33    5.54    2.19   0
  -1  -3  39    7.86    1.61   0
   1   1  32   24.21    2.13   0
  -6   2  34   -0.47    1.66   0
  -3  -3  40  140.72    2.44   0
  -3   3  35    9.17    2.13   0
  -2   2  36   29.14    2.14   0
  -2   4  32  105.95    2.77   0
  -1   1  36   81.97    2.55   0
  -1   3  33   26.66    2.49   0
  -6   0  36   36.53    2.01   0
  -4   0  38   12.32    1.80   0
  -4   4  32    5.47    2.28   0
  -3  -1  39    0.65    1.73   0
  -2  -2  39   11.22    1.78   0
   0   0  35    4.72    2.05   0
   0   2  32   14.32    2.17   0
  -5  -1  38   57.30    2.17   0
  -5   1  36    1.41    1.83   0
  -4  -2  39   11.08    1.80   0
  -3   3  34   24.67    2.18   0
  -3   5  29   23.82    2.66   0
  -2   2  35   51.75    2.30   0
  -2   4  31   13.51    2.24   0
  -1  -3  38   16.96    1.92   0
  -1  -1  37    2.65    2.07   0
  -1   1  35   -0.68    2.36   0
  -1   3  32   12.46    2.19   0
   0  -2  36   11.48    1.94   0
  -6  -2  37    5.80    2.30   0
  -4   2  35    3.53    2.23   0
  -4   4  31   13.17    2.45   0
  -2  -6  39    4.09    1.44   0
  -2  -4  39   13.65    1.67   0
  -2   0  37    1.78    2.23   0
   0   0  34  267.71    3.43   0
  -7  -1  34   34.02    1.96   0
  -6   0  35   -1.75    1.73   0
  -4   0  37   -1.17    2.08   0
  -3  -3  39   13.08    1.86   0
  -3  -1  38  116.91    2.56   0
  -3   1  36  106.62    2.55   0
  -3   3  33    5.49    2.18   0
  -2  -2  38   45.43    2.22   0
  -2   2  34   23.92    2.40   0
  -1   1  34    3.42    2.31   0
   0  -2  35   77.28    2.71   0
  -5  -3  38    5.37    2.33   0
  -5   1  35    5.66    2.01   0
  -4  -4  39    2.91    1.68   0
  -4   2  34    2.78    2.19   0
  -4   4  30   23.32    2.31   0
  -3  -5  39  183.87    2.30   0
  -2   0  36  201.76    3.24   0
  -1  -1  36   78.34    2.64   0
   0   0  33    2.78    1.85   0
  -5   3  31   14.20    2.37   0
  -4  -2  38   21.29    1.86   0
  -4   4  29    6.06    2.18   0
  -3   1  35    3.10    2.12   0
  -2  -4  38  112.71    2.68   0
  -2   2  33   10.45    2.22   0
  -1   1  33    5.81    2.27   0
  -7  -1  33   77.43    2.31   0
  -6   0  34   82.21    2.58   0
  -4   2  33    3.19    2.27   0
  -3  -3  38   43.90    2.04   0
  -3   3  31   25.69    2.23   0
  -2  -6  38   -0.51    1.64   0
  -1  -1  35    0.36    2.26   0
   0  -2  34   44.47    2.32   0
  -5  -1  36    2.39    1.89   0
  -4   4  28   98.45    2.82   0
  -3  -7  38    5.78    1.84   0
  -3   1  34  152.35    3.02   0
  -2   0  35   -1.05    2.08   0
  -2   2  32    7.72    2.24   0
  -1  -3  36    4.45    2.00   0
  -1   1  32  497.32    4.49   0
  -7  -3  34   47.34    2.68   0
  -5  -3  37    8.37    2.05   0
  -5   1  33   65.18    2.63   0
  -5   3  29   45.44    2.64   0
  -4  -6  38    7.05    1.73   0
  -4  -2  37    9.35    2.12   0
  -4   0  35   -0.34    2.46   0
  -4   2  32   41.32    2.73   0
  -3  -5  38   26.98    2.18   0
  -3  -1  36  102.69    2.77   0
  -1  -1  34    2.51    2.31   0
   0  -2  33  108.93    2.65   0
  -7  -1  32  113.49    2.21   0
  -6  -4  36   49.90    2.37   0
  -6  -2  35   10.00    2.07   0
  -6   0  33   -0.28    1.84   0
  -5  -1  35    3.48    2.05   0
  -3  -3  37    9.52    2.23   0
  -3   1  33   14.60    2.31   0
  -2  -6  37   84.45    2.45   0
  -2  -4  37    9.89    2.13   0
  -2  -2  36   31.49    2.26   0
  -2   0  34  474.49    4.45   0
  -5  -5  37   24.29    1.80   0
  -5   1  32  284.74    3.99   0
  -4   0  34  236.17    3.26   0
  -4   2  31   25.64    2.65   0
   0  -2  32   11.60    2.18   0
  -7  -3  33   86.48    2.44   0
  -5  -3  36    2.99    1.85   0
  -4  -4  37   61.62    2.08   0
  -3  -7  37   28.51    1.70   0
  -3  -5  37   85.12    2.37   0
  -3   1  32  470.68    4.48   0
  -2  -2  35   51.16    2.53   0
  -2   0  33    1.31    2.23   0
  -7  -1  31    3.92    1.94   0
  -6  -4  35    6.11    1.96   0
  -5   1  31    4.20    2.87   0
  -5   3  27    2.57    2.31   0
  -4  -6  37  217.27    2.71   0
  -4   2  30   85.22    2.82   0
  -3  -9  36   57.52    1.83   0
  -3  -3  36   11.02    2.45   0
  -1  -5  35    2.22    1.94   0
  -1  -3  34   22.99    2.36   0
  -6   0  31    0.65    2.44   0
  -4  -2  35    5.27    2.29   0
  -4   0  33   -0.63    2.16   0
  -3  -1  34  157.78    3.05   0
  -3   1  31   18.93    2.39   0
  -2  -6  36    2.63    1.95   0
  -2  -2  34   21.01    3.16   0
  -2   0  32    5.47    2.37   0
  -1  -1  32  500.86    4.64   0
  -7  -3  32    4.47    2.09   0
  -7  -1  30   15.79    2.31   0
  -6  -6  35   21.23    2.24   0
  -6  -2  33    5.59    1.99   0
  -5  -7  36   28.39    1.90   0
  -5  -1  33   60.34    2.70   0
  -4  -8  36   12.67    1.96   0
  -4  -4  36   62.19    2.45   0
  -3  -5  36    1.49    2.13   0
  -2  -4  35   22.41    2.41   0
  -8  -4  30   14.69    2.29   0
  -7  -5  33    5.02    2.12   0
  -6  -4  34   16.75    2.34   0
  -6   0  30  193.89    3.61   0
  -5   1  30   -1.62    2.41   0
  -4  -6  36    8.26    1.93   0
  -4   0  32  150.13    3.14   0
  -3  -7  36   20.54    2.09   0
  -3  -3  35    7.76    2.44   0
  -3  -1  33   16.87    2.34   0
  -1  -5  34   19.59    2.16   0
  -1  -3  33   25.48    2.39   0
  -5  -5  35   86.54    2.66   0
  -3  -9  35   -2.17    2.01   0
  -2  -2  33   10.95    2.52   0
  -7  -3  31   -1.57    2.44   0
  -6  -6  34   12.72    2.24   0
  -5  -7  35   76.58    2.09   0
  -5  -1  32  286.42    3.71   0
  -4   0  31   -1.30    2.13   0
  -3  -3  34   27.14    2.28   0
  -3  -1  32  456.01    4.53   0
  -2  -4  34   62.50    2.78   0
  -1  -5  33   38.41    2.40   0
  -1  -3  32   10.08    2.13   0
  -8  -4  29   20.38    1.97   0
  -7  -5  32   36.01    2.37   0
  -6   0  29   -0.90    2.32   0
  -5   1  28   52.05    2.66   0
  -4  -6  35  130.47    2.74   0
  -4  -2  33    4.41    2.18   0
  -3  -7  35    4.15    2.03   0
  -2  -2  32   10.73    2.62   0
  -7  -7  32    4.87    2.22   0
  -7  -1  28    3.03    1.97   0
  -6  -2  31  181.07    3.19   0
  -5  -9  34    0.90    2.16   0
  -5  -5  34   -3.18    2.62   0
  -5  -3  33   52.15    2.79   0
  -5  -1  31    0.73    2.73   0
  -4 -10  34   89.81    2.02   0
  -4  -4  34   95.51    2.76   0
  -4   0  30  418.98    4.37   0
  -3  -1  31   19.54    2.98   0
  -2  -8  34    4.60    1.75   0
  -2  -6  34    4.75    2.22   0
  -2  -4  33    8.94    3.02   0
  -7  -3  30   13.34    1.85   0
  -6   0  28  138.34    3.25   0
  -4  -2  32   39.00    2.61   0
  -3  -9  34    2.05    1.82   0
  -3  -5  34   35.49    2.60   0
  -3  -3  33    1.76    2.33   0
  -1  -5  32   87.81    2.66   0
  -8  -6  29  201.88    3.00   0
  -7  -5  31   48.45    2.26   0
  -6  -8  33   10.80    1.91   0
  -6  -6  33    4.96    1.95   0
  -6  -4  32    0.45    2.46   0
  -5  -7  34   16.03    1.94   0
  -5  -1  30    2.03    2.61   0
  -7  -7  31   21.98    2.67   0
  -6  -2  30    3.84    2.44   0
  -6   0  27    1.38    2.23   0
  -5  -3  32   42.79    2.43   0
  -4  -8  34   12.47    2.02   0
  -4  -4  33    5.28    2.17   0
  -3  -3  32    4.35    2.63   0
  -2  -4  32  107.87    3.22   0
  -1  -5  31  121.71    3.09   0
  -5  -9  33   27.34    2.02   0
  -5  -1  29   17.93    2.69   0
  -4 -10  33   25.74    1.92   0
  -4  -2  31   25.71    2.47   0
  -3  -5  33  232.58    3.56   0
  -8  -6  28   -0.71    2.20   0
  -7  -5  30   14.55    1.97   0
  -6  -8  32   20.40    2.09   0
  -6  -6  32    0.31    2.20   0
  -6  -2  29   20.78    2.59   0
  -6   0  26  260.93    3.64   0
  -5  -7  33   31.18    2.32   0
  -4  -6  33    3.03    2.63   0
  -4  -4  32    5.83    2.33   0
  -3  -7  33   42.06    2.64   0
  -3  -3  31   27.70    2.48   0
  -2  -6  32    3.50    2.23   0
  -2  -4  31   11.00    2.43   0
  -8  -8  28    9.81    2.48   0
  -7  -9  30    8.92    2.37   0
  -7  -3  28    0.55    2.48   0
  -5  -5  32   53.00    2.60   0
  -5  -1  28   53.96    2.91   0
  -4 -12  31    0.37    1.82   0
  -4  -8  33    0.01    2.16   0
  -4  -2  30   86.26    2.80   0
  -3  -5  32   15.57    2.75   0
  -2  -8  32    9.34    2.15   0
  -7  -7  30    5.56    1.96   0
  -6 -10  31   40.96    2.05   0
  -6  -6  31   17.57    2.44   0
  -6  -4  30   44.08    2.55   0
  -6  -2  28   -0.53    2.54   0
  -5  -3  30   62.20    2.73   0
  -8  -6  27  329.34    3.29   0
  -7  -3  27   27.58    2.52   0
  -6  -8  31    2.97    1.94   0
  -5 -11  31  123.25    2.40   0
  -4  -6  32    3.27    2.54   0
  -4  -4  31   15.43    2.48   0
  -4  -2  29   77.90    2.99   0
  -3 -11  31   80.82    2.42   0
  -3  -7  32    2.83    2.68   0
  -3  -3  30   81.64    2.89   0
  -2  -6  31   58.41    2.79   0
  -8  -8  27   20.16    2.19   0
  -7  -9  29    1.39    2.65   0
  -7  -7  29   42.71    2.60   0
  -6  -2  27   12.42    2.47   0
  -5  -5  31    9.42    2.35   0
  -2  -8  31   13.17    2.28   0
  -7  -3  26   38.87    3.01   0
  -6 -10  30    2.68    1.88   0
  -5  -9  31   26.10    2.65   0
  -4 -12  30   94.81    2.57   0
  -4  -4  30   22.98    2.62   0
  -6  -2  26   80.81    2.85   0
  -5 -11  30    3.11    2.42   0
  -5  -5  30   73.17    2.81   0
  -4 -10  31    6.99    1.92   0
  -4  -6  31    2.25    2.24   0
  -3  -9  31   16.29    2.54   0
  -3  -7  31  124.04    3.26   0
  -2  -6  30   -1.90    2.09   0
  -8  -8  26    2.35    2.23   0
  -7  -9  28    4.11    2.55   0
  -7  -5  27   15.63    3.05   0
  -6  -4  28  108.36    3.38   0
  -5  -3  28   11.55    2.31   0
  -4  -8  31   43.05    2.85   0
  -3 -11  30    2.51    1.90   0
  -2  -8  30   30.26    2.38   0
  -8  -6  25    2.48    2.25   0
  -7 -11  27   28.62    2.73   0
  -7  -3  25   68.75    3.00   0
  -6 -12  28    3.09    2.15   0
  -6 -10  29  167.60    2.79   0
  -6  -6  29   24.96    2.82   0
  -6  -2  25   30.76    2.87   0
  -5 -13  28    1.59    1.99   0
  -5  -9  30   29.17    2.92   0
  -5  -7  30   -0.14    2.24   0
  -4  -6  30   43.42    2.88   0
  -3  -7  30   25.52    2.89   0
  -8 -10  25   10.52    2.41   0
  -6  -8  29    3.18    2.53   0
  -5  -5  29  130.65    3.30   0
  -5  -3  27    2.46    2.55   0
  -4 -14  27   18.60    1.79   0
  -4 -12  29   51.60    2.34   0
  -4 -10  30   45.86    2.66   0
  -4  -8  30    3.02    2.44   0
  -3  -9  30   39.88    2.67   0
  -8  -8  25   21.88    2.24   0
  -7  -9  27    2.24    2.50   0
  -7  -5  26    8.42    2.54   0
  -7  -3  24    8.36    2.52   0
  -6  -6  28   10.42    2.78   0
  -5 -11  29   14.00    2.09   0
  -4  -4  28   96.12    3.11   0
  -2  -8  29   23.09    2.57   0
  -9  -9  21    0.28    2.57   0
  -7 -11  26    8.62    2.34   0
  -6 -12  27   68.82    2.30   0
  -6 -10  28    5.48    2.24   0
  -5  -7  29  108.56    2.97   0
  -4  -6  29   33.41    2.74   0
  -3  -7  29   33.06    2.87   0
  -8 -10  24   -1.55    2.56   0
  -8  -8  24   -1.38    2.71   0
  -7  -5  25  327.44    4.18   0
  -5 -13  27    1.22    2.06   0
  -4 -12  28    9.56    2.18   0
  -4  -8  29    2.78    2.77   0
  -3  -9  29    0.28    2.40   0
  -2  -8  28   66.99    2.82   0
  -7 -13  24   12.29    2.42   0
  -7  -9  26    4.17    2.36   0
  -6  -6  27  378.72    4.43   0
  -5 -11  28    0.60    2.30   0
  -5  -7  28   31.93    2.67   0
  -5  -5  27    2.00    2.36   0
  -4 -14  26   16.52    2.00   0
  -4  -6  28    8.07    2.43   0
  -3 -11  28   28.63    2.53   0
  -9  -9  20    3.54    2.23   0
  -8 -12  22   17.43    2.65   0
  -7 -11  25   79.41    2.95   0
  -7  -5  24   37.73    3.33   0
  -6 -12  26   35.34    2.74   0
  -6 -10  27   29.54    2.59   0
  -6  -8  27   45.50    2.72   0
  -5  -9  28    0.72    2.64   0
  -3  -9  28  122.13    3.35   0
  -3  -7  28   48.86    2.98   0
  -8  -8  23   10.62    2.61   0
  -7  -7  25  144.31    3.71   0
  -6 -14  24   31.44    2.09   0
  -6  -6  26   10.22    2.85   0
  -4 -10  28   10.34    2.77   0
  -4  -8  28  100.89    3.27   0
  -2  -8  27   26.40    2.57   0
  -9  -9  19   75.62    2.66   0
  -7 -13  23   22.86    2.35   0
  -6  -4  24   31.99    3.01   0
  -5  -7  27   15.17    2.77   0
  -4  -6  27  154.27    3.50   0
  -3 -11  27   -1.77    2.49   0
  -3  -7  27   11.08    2.67   0
  -9 -11  18   23.58    2.85   0
  -8 -12  21   21.45    3.26   0
  -8 -10  22   20.44    2.43   0
  -8  -8  22    1.62    2.40   0
  -8  -6  21   24.32    3.00   0
  -7 -11  24   68.78    2.55   0
  -7  -5  23   42.02    2.82   0
  -6  -8  26   18.81    2.49   0
  -6  -6  25  134.05    4.03   0
  -5  -9  27   26.93    2.47   0
  -4 -10  27  196.69    3.70   0
  -4  -8  27    0.66    2.60   0
  -3  -9  27   10.32    2.52   0
  -6 -14  23   47.44    2.71   0
  -5 -15  23   51.31    2.10   0
  -5  -7  26    8.68    2.71   0
  -9  -9  18    2.72    2.29   0
  -7 -13  22    3.73    2.15   0
  -6  -8  25   35.65    2.85   0
  -5  -9  26   31.37    2.76   0
  -4 -14  24   53.34    2.77   0
  -3 -11  26   -0.72    2.63   0
  -9 -11  17   52.42    2.89   0
  -8 -12  20   14.12    2.78   0
  -8 -10  21   78.06    2.64   0
  -8  -6  20   -0.77    2.41   0
  -7 -11  23   54.17    2.88   0
  -7  -7  23   14.67    2.93   0
  -6 -12  24   72.33    2.84   0
  -6  -6  24    3.31    2.87   0
  -4 -10  26   14.44    2.83   0
  -3  -9  26   54.21    2.83   0
  -7  -9  23   78.23    3.40   0
  -7  -5  21   10.88    2.89   0
  -6 -14  22   12.44    2.25   0
  -5 -15  22   10.39    2.21   0
  -5 -13  24   37.54    2.56   0
  -5 -11  25  139.45    3.60   0
  -5  -7  25  145.58    3.67   0
  -8 -10  20   48.85    2.70   0
  -8  -8  20   11.80    3.01   0
  -7 -13  21   69.21    2.71   0
  -7 -11  22   23.01    3.29   0
  -7  -7  22   71.06    3.48   0
  -6 -10  24   21.05    2.82   0
  -6  -8  24    3.96    2.78   0
  -6  -6  23   57.08    3.50   0
  -5  -9  25   36.17    3.11   0
  -3 -11  25   79.12    3.22   0
  -8 -12  19    4.78    2.53   0
  -7  -9  22    2.74    2.83   0
  -7  -5  20   40.83    3.04   0
  -6 -12  23   77.64    3.00   0
  -5  -7  24   15.08    2.81   0
  -4 -14  23   47.67    2.48   0
  -4 -10  25    3.12    3.00   0
  -4  -8  25   53.95    3.06   0
  -3  -9  25  127.20    3.36   0
  -8  -8  19   13.25    3.13   0
  -7 -15  18   29.06    2.58   0
  -7  -7  21    9.33    3.20   0
  -6 -14  21   39.87    2.58   0
  -6  -8  23   85.27    3.39   0
  -5 -13  23   58.90    2.95   0
  -4 -12  24  152.25    3.68   0
  -1  19 -14   63.38    2.07   0
   0  18 -15   40.68    2.15   0
   1  17 -15  410.15    3.61   0
   1  19 -11   17.05    1.82   0
   2  14 -16    1.82    1.92   0
   2  16 -14    1.42    1.99   0
   3  15 -12   12.17    2.21   0
  -3  19 -13   19.87    2.29   0
  -2  20 -11   33.36    2.36   0
  -1  15 -19   -3.55    2.24   0
   0  14 -19  161.53    3.03   0
   3  17  -8    5.22    2.01   0
  -1  19 -13   84.99    2.23   0
   0  16 -17  111.23    2.75   0
   0  20  -9   20.38    1.94   0
   1  17 -14    5.38    1.96   0
   1  19 -10    8.17    1.87   0
   2  14 -15    2.59    2.01   0
   2  16 -13   69.86    2.57   0
   3  15 -11   41.57    2.29   0
   3  17  -7   23.42    2.02   0
  -3  17 -16   32.58    1.79   0
   1  15 -16    5.79    2.23   0
   1  19  -9   16.35    1.99   0
   3  15 -10   -1.03    2.05   0
   3  17  -6    2.85    1.90   0
  -3  19 -12    0.40    1.86   0
  -2  20 -10    0.51    2.04   0
  -1  13 -19   31.78    2.41   0
  -1  15 -18    6.98    2.18   0
  -1  19 -12    2.00    1.72   0
   0  16 -16    5.36    2.06   0
   0  20  -8   94.76    2.19   0
   1  17 -13   20.97    2.08   0
   2  14 -14   45.32    2.20   0
  -3  17 -15   16.97    2.19   0
  -2  18 -14   81.56    2.33   0
  -1  17 -15  142.72    3.13   0
   0  20  -7   66.27    2.11   0
   1  15 -15   32.44    2.30   0
   2  16 -11    2.80    2.27   0
   2  18  -7  142.98    2.87   0
   3  15  -9   99.06    2.84   0
  -3  19 -11    6.96    2.06   0
  -2  14 -18   29.70    2.08   0
  -2  20  -9    2.76    1.93   0
  -1  15 -17   14.18    2.40   0
   0  14 -17   68.32    2.51   0
   0  16 -15    9.23    2.18   0
   1  17 -12   60.47    2.28   0
   1  19  -7    9.70    1.97   0
   2  18  -6    6.08    2.26   0
   3  15  -8   49.41    2.36   0
  -2  16 -16   74.17    2.59   0
  -2  18 -13    1.86    1.86   0
  -1  21  -3  181.78    2.14   0
   0  20  -6  104.82    2.20   0
   1  15 -14   14.64    2.16   0
   1  19  -6   13.26    2.32   0
   2  16 -10   41.90    2.50   0
   2  18  -5    6.43    2.51   0
   3  15  -7   14.37    1.86   0
  -3  17 -14    7.44    1.77   0
  -1  15 -16    8.45    2.72   0
  -1  17 -14   46.72    2.38   0
  -1  21  -2    2.86    1.74   0
   0  14 -16   12.52    2.07   0
   0  16 -14    6.04    2.09   0
   0  18 -11  168.02    2.90   0
   0  20  -5   12.53    1.81   0
   1  17 -11   87.36    2.47   0
  -4  18 -11   -0.83    1.88   0
  -3  19 -10    1.79    1.94   0
  -2  14 -17  131.77    2.78   0
  -2  16 -15    3.59    2.39   0
  -1  21  -1    1.59    1.69   0
   0  20  -4   15.53    2.04   0
   1  15 -13   42.34    2.32   0
   1  19  -5   49.81    2.28   0
   2  18  -3   80.06    2.68   0
  -1  17 -13  145.08    3.00   0
  -1  19  -9   41.25    2.27   0
  -1  21   0    2.49    1.69   0
   0  16 -13   67.29    2.49   0
   0  18 -10    1.84    1.90   0
   1  19  -4    6.26    2.14   0
   2  16  -8   39.20    2.31   0
   2  18  -2   13.55    2.30   0
  -3  19  -9    0.79    1.97   0
  -1  15 -15    0.45    2.27   0
   0  18  -9   32.59    2.21   0
   0  20  -3   -1.35    1.70   0
   1  15 -12  128.41    2.89   0
   1  17  -9    6.03    2.18   0
   1  19  -3   24.56    2.13   0
  -3  15 -15    4.29    1.89   0
  -2  14 -16   18.44    2.15   0
  -2  16 -14   10.56    2.23   0
  -1  17 -12   79.30    2.36   0
  -1  19  -8   20.37    2.09   0
   0  16 -12   20.34    2.16   0
   0  20  -2    4.28    1.88   0
   1  19  -2    9.47    2.02   0
   2  16  -7  154.05    2.82   0
  -3  19  -8   24.41    1.75   0
  -2  20  -5   79.96    2.28   0
  -1  15 -14    0.65    2.17   0
  -1  19  -7   11.73    2.10   0
   0  18  -8    4.93    2.00   0
   0  20  -1   18.73    1.94   0
   0  20   0    0.94    2.19   0
   1  19  -1    7.04    1.82   0
  -4  18  -9   32.95    1.95   0
  -2  16 -13   32.25    2.33   0
  -2  20  -4    5.64    1.92   0
  -1  17 -11    7.12    2.12   0
   0  16 -11    3.16    2.07   0
   0  20   1   20.08    2.30   0
   1  19   0    2.22    1.75   0
   2  16  -5   28.69    2.17   0
  -3  15 -14   50.17    2.29   0
  -3  17 -11   84.55    2.94   0
  -3  19  -7   53.39    2.06   0
  -1  15 -13    4.04    2.10   0
   0  18  -7   49.92    2.33   0
   0  20   2    4.16    1.80   0
   1  17  -6   18.50    2.74   0
   1  19   1    3.73    1.92   0
   1  19   2    2.76    2.04   0
  -2  16 -12    2.85    2.69   0
  -2  18  -9   92.99    2.72   0
  -1  17 -10  107.95    2.72   0
   0  16 -10   58.70    2.48   0
   0  18  -6   -0.50    2.21   0
   0  20   3   -0.16    1.61   0
   0  20   4   17.95    1.77   0
   2  16  -4   75.03    2.52   0
  -3  15 -13   40.99    2.31   0
  -3  19  -6   37.62    1.98   0
  -2  14 -14   31.10    2.32   0
  -2  18  -8    2.21    2.78   0
   1  17  -5  119.97    2.93   0
   2  16  -3   32.64    2.24   0
  -4  16 -11   24.41    2.02   0
  -3  17 -10   99.61    2.58   0
  -3  19  -5    4.95    2.11   0
  -2  20  -1   72.66    2.13   0
  -1  15 -12   34.02    2.30   0
  -1  17  -9   10.12    2.06   0
   0  16  -9    3.93    2.19   0
   1  17  -4  111.92    2.84   0
   2  16  -2    6.96    1.99   0
  -4  18  -7   60.92    2.15   0
  -2  16 -11    6.23    2.29   0
  -2  18  -7   76.75    2.60   0
  -2  20   0    9.23    2.10   0
   0  18  -4    3.58    2.36   0
  -5  17  -7    0.05    2.04   0
  -4  16 -10   68.60    2.28   0
  -3  15 -12   40.72    2.39   0
  -3  17  -9   17.35    2.25   0
  -2  20   1    9.94    2.13   0
  -1  15 -11   87.99    2.45   0
  -1  17  -8    2.41    2.08   0
   0  16  -8   98.28    2.55   0
   0  18  -3   24.43    2.21   0
   1  17  -3   85.36    2.55   0
  -4  18  -6    3.60    1.78   0
  -2  16 -10   40.43    2.39   0
  -2  18  -6    2.01    1.98   0
  -2  20   2   10.33    2.16   0
  -1  17  -7    2.70    2.10   0
   1  17  -2  110.99    2.67   0
  -4  18  -5   12.53    2.09   0
  -3  19  -3   60.69    2.24   0
   0  16  -7   16.83    2.11   0
   0  18  -2   38.64    2.24   0
   1  17  -1    3.23    2.15   0
  -5  17  -6    5.37    1.69   0
  -4  16  -9   -1.04    2.01   0
  -3  19  -2    0.46    1.95   0
  -2  16  -9    3.62    2.24   0
  -2  18  -5   -1.11    1.88   0
  -2  20   4    6.70    1.78   0
   0  16  -6   66.37    2.38   0
   0  18  -1  115.71    2.81   0
   1  17   0   50.62    2.34   0
  -4  18  -4    2.81    1.85   0
  -3  15 -10    5.25    1.93   0
  -3  17  -7   33.70    2.21   0
  -2  18  -4    1.54    1.89   0
  -2  20   5   67.17    2.09   0
  -2  20   6    8.81    1.88   0
  -2  20   7    5.17    2.13   0
   0  18   0  236.71    3.39   0
   1  17   1   16.90    2.23   0
  -5  17  -5  255.32    2.89   0
  -4  16  -8  145.09    2.89   0
  -3  19  -1    6.64    1.95   0
  -2  16  -8  145.15    2.78   0
  -2  20   8   51.08    1.97   0
  -2  20   9   -0.44    1.52   0
  -2  20  10   15.64    1.69   0
  -1  17  -5  102.47    2.61   0
   0  16  -5   14.88    1.93   0
   1  17   2   82.43    2.38   0
  -5  19   3   36.58    2.50   0
  -4  18  -3   76.87    2.30   0
  -3  17  -6    3.76    2.05   0
  -3  19   0   27.67    2.21   0
  -2  18  -3    2.13    1.99   0
  -1  17  -4  167.28    2.93   0
   0  16  -4   13.03    2.04   0
   1  17   3    8.89    1.90   0
  -5  17  -4   33.28    1.99   0
  -5  19   4   39.40    2.56   0
  -4  16  -7   10.40    2.18   0
  -3  15  -9   -0.07    2.01   0
  -3  19   1   89.36    2.39   0
  -2  16  -7   21.59    2.04   0
  -2  18  -2    8.13    2.02   0
  -1  19   5   50.52    2.26   0
   0  18   3   21.76    2.14   0
  -6  18   3  142.38    2.66   0
  -5  19   5   82.56    2.61   0
  -3  17  -5  156.87    2.87   0
  -3  19   2    6.37    2.00   0
  -1  17  -3    9.60    2.02   0
  -1  19   6   14.17    2.01   0
  -1  19   7    8.24    1.85   0
   0  16  -3   26.52    2.08   0
   0  18   4    0.33    2.11   0
   0  18   5   66.31    2.40   0
  -4  16  -6   83.49    2.45   0
  -3  15  -8   70.59    2.44   0
  -3  17  -4  120.19    2.76   0
  -3  19   3   -0.45    1.93   0
  -2  16  -6   71.73    2.39   0
  -2  18  -1   16.70    1.99   0
  -1  17  -2   81.08    2.56   0
  -1  19   8    9.95    1.90   0
  -1  19   9   16.39    2.02   0
  -1  19  10    5.71    1.69   0
  -1  19  11   15.66    1.67   0
  -1  19  12    6.98    1.64   0
   0  16  -2   68.24    2.30   0
   0  18   7   47.75    2.55   0
  -5  19   8   12.96    2.19   0
  -3  19   4   39.52    2.06   0
  -2  18   0  102.71    2.48   0
   0  18   8    3.66    1.91   0
  -4  16  -5    8.64    2.02   0
  -3  15  -7   20.39    2.10   0
  -3  17  -3   -0.41    1.97   0
  -3  19   5  171.97    2.66   0
  -2  16  -5   11.27    1.97   0
  -2  18   1  155.19    2.62   0
  -1  17  -1   21.34    2.06   0
   0  16  -1    0.81    2.02   0
  -4  14  -8   12.68    1.86   0
  -3  19   6   35.38    1.97   0
  -3  19   7  120.22    2.45   0
  -2  16  -4    6.16    1.91   0
  -2  18   2   14.40    1.91   0
  -1  17   0   49.66    2.24   0
   0  16   0   26.94    2.33   0
  -6  18   8   18.15    2.11   0
  -5  15  -5  116.74    2.45   0
  -4  16  -4   11.49    2.21   0
  -3  15  -6   16.34    2.15   0
  -3  17  -2  109.04    2.49   0
  -3  19   8    3.10    1.73   0
  -3  19   9    4.02    1.75   0
  -3  19  14   55.77    1.89   0
  -2  18   3   85.40    2.45   0
  -1  17   1    0.95    2.14   0
  -6  16  -1    4.29    1.68   0
  -6  18   9  149.98    2.34   0
  -3  17  -1    2.92    1.97   0
  -3  19  10    2.81    1.63   0
  -3  19  11    3.45    1.74   0
  -3  19  12    4.87    1.76   0
  -3  19  13   14.77    1.77   0
  -2  16  -3    1.49    1.91   0
  -2  18   4   17.97    2.40   0
  -1  17   2  107.00    2.74   0
  -5  15  -4   50.35    2.50   0
  -4  16  -3   98.51    2.82   0
  -3  15  -5   28.31    1.97   0
  -2  18   5    9.56    2.12   0
  -1  17   3   78.90    2.64   0
   0  16   2   71.02    2.22   0
  -3  17   0   57.39    2.34   0
  -2  16  -2  261.94    3.26   0
  -2  18   6    9.80    2.23   0
  -1  17   4  110.42    2.74   0
   0  16   3   25.63    2.06   0
  -5  15  -3   36.29    2.56   0
  -4  16  -2  125.44    2.77   0
  -4  18   5    9.57    1.88   0
  -4  18   6    2.95    2.20   0
  -3  15  -4  269.08    3.37   0
  -3  17   1    6.37    2.11   0
  -2  16  -1   72.31    2.38   0
  -2  18   7  140.31    2.75   0
  -2  18   8   -1.07    2.19   0
  -2  18  17  185.50    2.28   0
  -1  17   5  114.99    2.82   0
  -4  16  -1   27.18    2.33   0
  -4  18   7   82.24    2.25   0
  -3  17   2  263.51    3.18   0
  -2  18  15    2.91    1.89   0
  -2  18  16   35.21    1.76   0
  -1  17   6   15.33    2.25   0
   0  16   5   15.17    2.11   0
   0  16   6   66.10    2.48   0
  -5  15  -2  240.07    3.49   0
  -4  18   8    0.17    2.03   0
  -4  18  17   82.27    1.84   0
  -3  17   3   80.73    2.69   0
  -2  16   0  199.78    2.97   0
  -2  18  12    8.77    1.98   0
  -2  18  13  178.18    2.64   0
  -2  18  14   41.59    2.04   0
  -1  17   7    0.84    2.32   0
   0  16   7   14.20    2.16   0
  -4  18   9  199.43    2.72   0
  -4  18  10    3.78    1.89   0
  -4  18  11   33.22    1.88   0
  -4  18  15    0.33    1.99   0
  -4  18  16   26.70    1.74   0
  -2  16   1   26.08    2.19   0
  -1  17   9    6.10    2.02   0
   0  16   8   97.14    2.33   0
  -5  15  -1  207.46    2.96   0
  -4  18  12    3.14    1.66   0
  -4  18  13   16.97    1.81   0
  -3  17   4   30.45    2.12   0
  -2  16   2    5.71    1.85   0
  -1  17  10   26.00    2.22   0
  -1  17  11   90.88    2.50   0
  -1  17  13   18.87    2.00   0
  -3  17   5  241.70    3.04   0
  -7  15   5   41.51    2.12   0
  -5  15   0    6.08    2.14   0
  -5  17   8    1.37    1.86   0
  -4  16   2   82.38    2.56   0
  -3  17   6    1.88    1.95   0
  -3  17   7   23.63    2.36   0
  -3  17  21   11.85    1.24   0
  -5  17   9    3.38    1.94   0
  -5  17  19    3.69    1.44   0
  -3  17   8    5.65    1.82   0
  -3  17  20   22.82    1.87   0
  -2  16   4   78.72    2.37   0
  -7  15   6   14.37    1.68   0
  -6  16   7   -2.00    1.90   0
  -5  15   1    3.18    2.02   0
  -5  17  10    3.02    1.98   0
  -5  17  11   18.65    2.02   0
  -5  17  12   -0.79    2.13   0
  -5  17  17   20.33    1.93   0
  -5  17  18   10.86    1.70   0
  -3  17   9   40.17    2.37   0
  -3  17  10    1.19    2.53   0
  -3  17  19   47.87    1.75   0
  -2  16   5   28.81    2.04   0
  -7  15   7  114.77    2.31   0
  -6  14   1  276.60    3.11   0
  -6  16   8    4.34    1.79   0
  -5  15   2   33.36    2.24   0
  -5  17  13   20.88    1.86   0
  -5  17  14    3.50    1.86   0
  -5  17  15   26.13    1.97   0
  -5  17  16    3.15    1.68   0
  -4  16   4   16.38    2.07   0
  -3  17  11    6.44    2.30   0
[truncated: 9,932 more chars]
