# Supplementary material
Source: MDPI journal article supplement (https://www.mdpi.com/2304-6740/6/3/67)
Supplement: s1 [file s1 › sv0485.cif]

data_sv0485
 
_audit_creation_method            'SHELXL-2017/1'
_shelx_SHELXL_version_number      '2017/1'
_chemical_name_systematic         ?
_chemical_name_common             ?
_chemical_melting_point           ?
_chemical_formula_moiety          ?
_chemical_formula_sum             'C30 H50 Fe K O6 P3' 
_chemical_formula_weight          694.56

loop_
 _atom_type_symbol
 _atom_type_description
 _atom_type_scat_dispersion_real
 _atom_type_scat_dispersion_imag
 _atom_type_scat_source
 'C'  'C'   0.0181   0.0091
 'International Tables Vol C Tables 4.2.6.8 and 6.1.1.4'
 'H'  'H'   0.0000   0.0000
 'International Tables Vol C Tables 4.2.6.8 and 6.1.1.4'
 'Fe'  'Fe'  -1.1336   3.1974
 'International Tables Vol C Tables 4.2.6.8 and 6.1.1.4'
 'K'  'K'   0.3868   1.0657
 'International Tables Vol C Tables 4.2.6.8 and 6.1.1.4'
 'O'  'O'   0.0492   0.0322
 'International Tables Vol C Tables 4.2.6.8 and 6.1.1.4'
 'P'  'P'   0.2955   0.4335
 'International Tables Vol C Tables 4.2.6.8 and 6.1.1.4'
 
_space_group_crystal_system       triclinic
_space_group_IT_number            2
_space_group_name_H-M_alt         'P -1'
_space_group_name_Hall            '-P 1'
 
_shelx_space_group_comment
;
The symmetry employed for this shelxl refinement is uniquely defined
by the following loop, which should always be used as a source of
symmetry information in preference to the above space-group names.
They are only intended as comments.
;
 
loop_
 _space_group_symop_operation_xyz
 'x, y, z'
 '-x, -y, -z'
 
_cell_length_a                    10.7910(10)
_cell_length_b                    10.7753(10)
_cell_length_c                    16.8369(16)
_cell_angle_alpha                 73.904(7)
_cell_angle_beta                  71.663(7)
_cell_angle_gamma                 69.620(7)
_cell_volume                      1710.8(3)
_cell_formula_units_Z             2
_cell_measurement_temperature     100(2)
_cell_measurement_reflns_used    12430
_cell_measurement_theta_min      2.82
_cell_measurement_theta_max      69.98
 
_exptl_crystal_description       'plate'
_exptl_crystal_colour            'yellow'
_exptl_crystal_density_meas       ?
_exptl_crystal_density_method     ?
_exptl_crystal_density_diffrn     1.348          
_exptl_crystal_F_000              736
_exptl_transmission_factor_min    ?
_exptl_transmission_factor_max    ?
_exptl_crystal_size_max           0.170
_exptl_crystal_size_mid           0.090
_exptl_crystal_size_min           0.020
_exptl_absorpt_coefficient_mu     6.265
_shelx_estimated_absorpt_T_min    0.416
_shelx_estimated_absorpt_T_max    0.885
_exptl_absorpt_correction_type   integration
_exptl_absorpt_process_details
;
STOE X-Red32, absorption correction by Gaussian integration, analogous to
P. Coppens, "The Evaluation of Absorption and Extinction in Single-Crystal
Structure Analysis", published in
F. R. Ahmed (Editor), "Crystallographic Computing",
Munksgaard, Copenhagen (1970), 255 - 270
;
_exptl_absorpt_correction_T_min  0.4506
_exptl_absorpt_correction_T_max  0.8867
_exptl_absorpt_special_details    ?
_diffrn_ambient_temperature       100(2)
_diffrn_measurement_device         'Eulerian 4-circle diffractometer'
_diffrn_measurement_device_type    'STOE STADIVARI'

_diffrn_detector                   'Pilatus200K'
_diffrn_detector_type              'DECTRIS PILATUS 200K'
_diffrn_detector_area_resol_mean 5.81

_diffrn_source                   'Cu-Genix'
_diffrn_source_type              ?
_diffrn_radiation_probe          x-ray
_diffrn_source_target            ?
_diffrn_source_voltage           50
_diffrn_source_current           0.600
_diffrn_source_power             0.030
_diffrn_radiation_type           'Cu K\a'
_diffrn_radiation_wavelength     1.54186
_diffrn_radiation_monochromator  'Graded multilayer mirror'
_diffrn_radiation_polarisn_norm  0
_diffrn_radiation_collimation    '1.2 mm, 0.6 diameter'

_diffrn_measurement_method       'rotation method, \w scans'
_diffrn_measurement_details
; 1674 frames, detector distance = 40 mm
;

_diffrn_reflns_number             14316
_diffrn_reflns_av_unetI/netI      0.0767
_diffrn_reflns_av_R_equivalents   0.0772
_diffrn_reflns_limit_h_min        -12
_diffrn_reflns_limit_h_max        13
_diffrn_reflns_limit_k_min        -13
_diffrn_reflns_limit_k_max        7
_diffrn_reflns_limit_l_min        -20
_diffrn_reflns_limit_l_max        20
_diffrn_reflns_theta_min          2.815
_diffrn_reflns_theta_max          68.998
_diffrn_reflns_theta_full         67.686
_diffrn_measured_fraction_theta_max   0.977
_diffrn_measured_fraction_theta_full  0.984
_diffrn_reflns_Laue_measured_fraction_max    0.977
_diffrn_reflns_Laue_measured_fraction_full   0.984
_diffrn_reflns_point_group_measured_fraction_max   0.977
_diffrn_reflns_point_group_measured_fraction_full  0.984
_reflns_number_total              6198
_reflns_number_gt                 4302
_reflns_threshold_expression      'I > 2\s(I)'
_reflns_Friedel_coverage          0.000
_reflns_Friedel_fraction_max      .
_reflns_Friedel_fraction_full     .
 
_reflns_special_details
;
 Reflections were merged by SHELXL according to the crystal
 class for the calculation of statistics and refinement.
 
 _reflns_Friedel_fraction is defined as the number of unique
 Friedel pairs measured divided by the number that would be
 possible theoretically, ignoring centric projections and
 systematic absences.
;
 
_computing_data_collection        ?
_computing_cell_refinement        ?
_computing_data_reduction         ?
_computing_structure_solution     ?
_computing_structure_refinement 'SHELXL-2017/1 (Sheldrick, 2017)'
_computing_molecular_graphics     ?
_computing_publication_material   ?
_refine_special_details           ?
_refine_ls_structure_factor_coef  Fsqd
_refine_ls_matrix_type            full
_refine_ls_weighting_scheme       calc
_refine_ls_weighting_details
'w=1/[\s^2^(Fo^2^)+(0.1982P)^2^+6.7430P] where P=(Fo^2^+2Fc^2^)/3'
_atom_sites_solution_primary      ?
_atom_sites_solution_secondary    ?
_atom_sites_solution_hydrogens    geom
_refine_ls_hydrogen_treatment     constr
_refine_ls_extinction_method      none
_refine_ls_extinction_coef        .
_refine_ls_number_reflns          6198
_refine_ls_number_parameters      376
_refine_ls_number_restraints      0
_refine_ls_R_factor_all           0.1455
_refine_ls_R_factor_gt            0.1104
_refine_ls_wR_factor_ref          0.3201
_refine_ls_wR_factor_gt           0.2800
_refine_ls_goodness_of_fit_ref    1.024
_refine_ls_restrained_S_all       1.024
_refine_ls_shift/su_max           0.005
_refine_ls_shift/su_mean          0.000
 
loop_
 _atom_site_label
 _atom_site_type_symbol
 _atom_site_fract_x
 _atom_site_fract_y
 _atom_site_fract_z
 _atom_site_U_iso_or_equiv
 _atom_site_adp_type
 _atom_site_occupancy
 _atom_site_site_symmetry_order  
 _atom_site_calc_flag
 _atom_site_refinement_flags_posn
 _atom_site_refinement_flags_adp
 _atom_site_refinement_flags_occupancy
 _atom_site_disorder_assembly
 _atom_site_disorder_group
C1 C 0.7565(8) 0.2411(8) 0.4449(5) 0.0400(18) Uani 1 1 d . . . . .
C2 C 0.6245(8) 0.2245(8) 0.4923(5) 0.0391(18) Uani 1 1 d . . . . .
H2A H 0.540649 0.274051 0.477049 0.047 Uiso 1 1 calc R U . . .
C3 C 0.6404(7) 0.1229(8) 0.5646(5) 0.0386(18) Uani 1 1 d . . . . .
H3A H 0.569163 0.091564 0.605783 0.046 Uiso 1 1 calc R U . . .
C4 C 0.7799(7) 0.0747(7) 0.5663(4) 0.0317(15) Uani 1 1 d . . . . .
H4A H 0.818524 0.007882 0.609014 0.038 Uiso 1 1 calc R U . . .
C5 C 0.8515(7) 0.1465(8) 0.4908(5) 0.0367(18) Uani 1 1 d . . . . .
H5A H 0.947223 0.132816 0.474169 0.044 Uiso 1 1 calc R U . . .
C6 C 0.8155(8) 0.0100(8) 0.3359(5) 0.0430(19) Uani 1 1 d . . . . .
C7 C 0.6807(8) -0.0004(8) 0.3754(5) 0.0373(17) Uani 1 1 d . . . . .
H7A H 0.602581 0.051650 0.354147 0.045 Uiso 1 1 calc R U . . .
C8 C 0.6801(8) -0.0993(8) 0.4506(5) 0.0412(19) Uani 1 1 d . . . . .
H8A H 0.602697 -0.124624 0.488134 0.049 Uiso 1 1 calc R U . . .
C9 C 0.8173(7) -0.1549(7) 0.4605(5) 0.0375(17) Uani 1 1 d . . . . .
H9A H 0.847273 -0.223831 0.505352 0.045 Uiso 1 1 calc R U . . .
C10 C 0.9010(7) -0.0873(7) 0.3899(5) 0.0358(17) Uani 1 1 d . . . . .
H10A H 0.996438 -0.103472 0.380266 0.043 Uiso 1 1 calc R U . . .
C11 C 0.8300(8) 0.4828(7) 0.3700(5) 0.0392(18) Uani 1 1 d . . . . .
C12 C 0.8672(10) 0.5835(9) 0.2884(6) 0.053(2) Uani 1 1 d . . . . .
H12A H 0.881712 0.658394 0.303114 0.063 Uiso 1 1 calc R U . . .
H12B H 0.792861 0.618218 0.259326 0.063 Uiso 1 1 calc R U . . .
H12C H 0.950821 0.538081 0.250743 0.063 Uiso 1 1 calc R U . . .
C13 C 0.6987(9) 0.5599(9) 0.4274(6) 0.050(2) Uani 1 1 d . . . . .
H13A H 0.627982 0.603064 0.395474 0.060 Uiso 1 1 calc R U . . .
H13B H 0.718006 0.628845 0.445456 0.060 Uiso 1 1 calc R U . . .
H13C H 0.666896 0.496549 0.477744 0.060 Uiso 1 1 calc R U . . .
C14 C 0.9446(9) 0.4306(9) 0.4152(6) 0.048(2) Uani 1 1 d . . . . .
H14C H 0.916453 0.375443 0.470793 0.058 Uiso 1 1 calc R U . . .
H14B H 0.965962 0.506866 0.423227 0.058 Uiso 1 1 calc R U . . .
H14A H 1.025489 0.375708 0.380732 0.058 Uiso 1 1 calc R U . . .
C15 C 0.9891(9) 0.0192(8) 0.1665(5) 0.0437(19) Uani 1 1 d . . . . .
C16 C 1.1175(10) -0.0644(12) 0.1978(7) 0.075(3) Uani 1 1 d . . . . .
H16A H 1.184062 -0.112803 0.153566 0.090 Uiso 1 1 calc R U . . .
H16B H 1.094124 -0.129352 0.249592 0.090 Uiso 1 1 calc R U . . .
H16C H 1.156791 -0.004579 0.210309 0.090 Uiso 1 1 calc R U . . .
C17 C 0.9223(11) -0.0741(10) 0.1539(6) 0.060(3) Uani 1 1 d . . . . .
H17A H 0.899680 -0.135373 0.207807 0.072 Uiso 1 1 calc R U . . .
H17B H 0.985169 -0.126567 0.110656 0.072 Uiso 1 1 calc R U . . .
H17C H 0.838879 -0.020604 0.135049 0.072 Uiso 1 1 calc R U . . .
C18 C 1.0273(12) 0.1108(11) 0.0811(6) 0.069(3) Uani 1 1 d . . . . .
H18C H 0.944587 0.165503 0.061721 0.082 Uiso 1 1 calc R U . . .
H18B H 1.088638 0.055546 0.038976 0.082 Uiso 1 1 calc R U . . .
H18A H 1.073017 0.170081 0.087888 0.082 Uiso 1 1 calc R U . . .
C19 C 0.7410(16) 0.423(2) -0.0600(11) 0.123(7) Uani 1 1 d . . . . .
H19A H 0.665696 0.492430 -0.082786 0.148 Uiso 1 1 calc R U . . .
H19B H 0.799541 0.370643 -0.105062 0.148 Uiso 1 1 calc R U . . .
C20 C 0.8224(14) 0.4906(17) -0.0393(11) 0.134(9) Uani 1 1 d . . . . .
H20A H 0.862532 0.546996 -0.091700 0.161 Uiso 1 1 calc R U . . .
H20B H 0.897798 0.421957 -0.016238 0.161 Uiso 1 1 calc R U . . .
C21 C 0.7996(18) 0.627(2) 0.0600(15) 0.160(11) Uani 1 1 d . . . . .
H21A H 0.866423 0.667467 0.014523 0.192 Uiso 1 1 calc R U . . .
H21B H 0.848403 0.554674 0.099672 0.192 Uiso 1 1 calc R U . . .
C22 C 0.6931(19) 0.7312(15) 0.1059(11) 0.111(6) Uani 1 1 d . . . . .
H22A H 0.736144 0.776915 0.128573 0.133 Uiso 1 1 calc R U . . .
H22B H 0.641258 0.799754 0.066129 0.133 Uiso 1 1 calc R U . . .
C23 C 0.4927(17) 0.7569(13) 0.2170(12) 0.106(6) Uani 1 1 d . . . . .
H23A H 0.438565 0.820177 0.176778 0.127 Uiso 1 1 calc R U . . .
H23B H 0.524229 0.809529 0.242406 0.127 Uiso 1 1 calc R U . . .
C24 C 0.4103(13) 0.6770(15) 0.2840(10) 0.090(4) Uani 1 1 d . . . . .
H24A H 0.466937 0.610808 0.321940 0.107 Uiso 1 1 calc R U . . .
H24B H 0.333554 0.737163 0.318764 0.107 Uiso 1 1 calc R U . . .
C25 C 0.2699(14) 0.5409(14) 0.3048(8) 0.087(4) Uani 1 1 d . . . . .
H25A H 0.211052 0.530168 0.273864 0.105 Uiso 1 1 calc R U . . .
H25B H 0.210303 0.597574 0.347367 0.105 Uiso 1 1 calc R U . . .
C26 C 0.3312(10) 0.4113(11) 0.3490(6) 0.057(2) Uani 1 1 d . . . . .
H26A H 0.258848 0.375652 0.392046 0.068 Uiso 1 1 calc R U . . .
H26B H 0.391181 0.420753 0.379632 0.068 Uiso 1 1 calc R U . . .
C27 C 0.3287(14) 0.2597(14) 0.2749(9) 0.087(4) Uani 1 1 d . . . . .
H27A H 0.253452 0.332055 0.253800 0.104 Uiso 1 1 calc R U . . .
H27B H 0.288664 0.202986 0.327035 0.104 Uiso 1 1 calc R U . . .
C28 C 0.4113(12) 0.1763(11) 0.2087(7) 0.070(3) Uani 1 1 d . . . . .
H28A H 0.484013 0.101759 0.230921 0.084 Uiso 1 1 calc R U . . .
H28B H 0.352482 0.136457 0.194830 0.084 Uiso 1 1 calc R U . . .
C29 C 0.5463(12) 0.2014(17) 0.0691(8) 0.096(5) Uani 1 1 d . . . . .
H29A H 0.492672 0.155029 0.055850 0.115 Uiso 1 1 calc R U . . .
H29B H 0.624187 0.130327 0.088152 0.115 Uiso 1 1 calc R U . . .
C30 C 0.5998(15) 0.276(2) -0.0066(8) 0.110(6) Uani 1 1 d . . . . .
H30B H 0.524730 0.345912 -0.029533 0.132 Uiso 1 1 calc R U . . .
H30A H 0.652299 0.216854 -0.048731 0.132 Uiso 1 1 calc R U . . .
Fe1 Fe 0.75296(11) 0.04808(11) 0.45763(7) 0.0321(4) Uani 1 1 d . . . . .
K1 K 0.61855(17) 0.40382(18) 0.17463(12) 0.0486(5) Uani 1 1 d . . . . .
O1 O 0.6900(10) 0.3420(11) 0.0065(6) 0.107(4) Uani 1 1 d . . . . .
O2 O 0.7313(9) 0.5787(12) 0.0264(6) 0.114(4) Uani 1 1 d . . . . .
O3 O 0.6002(10) 0.6676(8) 0.1763(6) 0.088(3) Uani 1 1 d . . . . .
O4 O 0.3595(8) 0.6091(9) 0.2470(6) 0.082(2) Uani 1 1 d . . . . .
O5 O 0.4105(8) 0.3152(9) 0.2931(6) 0.085(2) Uani 1 1 d . . . . .
O6 O 0.4701(8) 0.2564(8) 0.1344(5) 0.078(2) Uani 1 1 d . . . . .
P1 P 0.78309(19) 0.35285(19) 0.34031(13) 0.0383(5) Uani 1 1 d . . . . .
P2 P 0.9753(2) 0.2392(2) 0.26702(14) 0.0447(6) Uani 1 1 d . . . . .
P3 P 0.8576(2) 0.1333(2) 0.23941(13) 0.0398(5) Uani 1 1 d . . . . .
 
loop_
 _atom_site_aniso_label
 _atom_site_aniso_U_11
 _atom_site_aniso_U_22
 _atom_site_aniso_U_33
 _atom_site_aniso_U_23
 _atom_site_aniso_U_13
 _atom_site_aniso_U_12
C1 0.035(4) 0.040(4) 0.043(4) -0.017(3) 0.011(3) -0.020(3)
C2 0.028(4) 0.036(4) 0.051(5) -0.021(4) 0.008(3) -0.013(3)
C3 0.028(4) 0.042(4) 0.048(4) -0.021(4) 0.011(3) -0.021(3)
C4 0.026(3) 0.035(4) 0.034(4) -0.014(3) 0.002(3) -0.010(3)
C5 0.023(4) 0.040(4) 0.052(4) -0.024(4) 0.008(3) -0.017(3)
C6 0.042(4) 0.032(4) 0.050(5) -0.016(4) 0.006(4) -0.014(3)
C7 0.029(4) 0.043(4) 0.045(4) -0.021(4) -0.001(3) -0.014(3)
C8 0.031(4) 0.037(4) 0.058(5) -0.024(4) 0.007(3) -0.017(3)
C9 0.030(4) 0.030(4) 0.044(4) -0.011(3) 0.008(3) -0.011(3)
C10 0.028(4) 0.033(4) 0.046(4) -0.021(3) 0.006(3) -0.012(3)
C11 0.038(4) 0.026(4) 0.057(5) -0.013(3) -0.011(4) -0.011(3)
C12 0.068(6) 0.040(5) 0.059(5) -0.003(4) -0.010(5) -0.037(5)
C13 0.038(4) 0.038(4) 0.076(6) -0.024(4) -0.003(4) -0.013(4)
C14 0.041(5) 0.046(5) 0.062(5) -0.018(4) -0.002(4) -0.022(4)
C15 0.049(5) 0.033(4) 0.037(4) -0.010(3) 0.005(3) -0.008(4)
C16 0.047(6) 0.080(8) 0.077(7) -0.039(6) 0.010(5) 0.003(5)
C17 0.080(7) 0.049(5) 0.050(5) -0.020(4) -0.004(5) -0.019(5)
C18 0.083(7) 0.062(6) 0.051(5) -0.019(5) 0.017(5) -0.031(6)
C19 0.068(10) 0.124(14) 0.103(12) -0.042(11) 0.021(9) 0.040(9)
C20 0.053(8) 0.105(12) 0.116(12) 0.041(10) 0.057(8) 0.014(8)
C21 0.075(10) 0.135(16) 0.22(2) 0.104(16) -0.042(13) -0.067(12)
C22 0.142(14) 0.071(9) 0.156(14) 0.052(9) -0.104(13) -0.069(10)
C23 0.128(13) 0.056(7) 0.174(16) -0.027(9) -0.093(13) -0.019(9)
C24 0.064(7) 0.094(10) 0.134(12) -0.072(9) -0.036(8) -0.001(7)
C25 0.090(9) 0.096(10) 0.081(8) -0.028(7) -0.004(7) -0.038(8)
C26 0.046(5) 0.070(7) 0.050(5) -0.011(5) 0.004(4) -0.025(5)
C27 0.086(9) 0.086(9) 0.091(9) 0.019(7) -0.026(7) -0.053(8)
C28 0.075(7) 0.060(7) 0.076(7) -0.012(6) -0.006(6) -0.032(6)
C29 0.046(6) 0.145(13) 0.067(8) -0.007(8) -0.005(6) -0.009(7)
C30 0.072(8) 0.201(18) 0.073(8) -0.090(11) -0.006(7) -0.018(10)
Fe1 0.0264(6) 0.0281(6) 0.0400(7) -0.0110(5) 0.0051(5) -0.0136(5)
K1 0.0343(9) 0.0436(10) 0.0573(11) -0.0112(8) 0.0066(8) -0.0127(8)
O1 0.081(6) 0.112(8) 0.070(6) -0.019(5) -0.001(5) 0.029(6)
O2 0.051(5) 0.170(10) 0.083(6) 0.048(6) -0.009(4) -0.048(6)
O3 0.100(6) 0.052(5) 0.128(7) -0.004(5) -0.054(6) -0.026(5)
O4 0.056(4) 0.096(6) 0.096(6) -0.043(5) 0.000(4) -0.021(4)
O5 0.072(5) 0.085(6) 0.091(6) 0.003(5) -0.006(4) -0.041(5)
O6 0.072(5) 0.071(5) 0.087(6) -0.025(4) -0.014(4) -0.015(4)
P1 0.0318(10) 0.0320(10) 0.0487(11) -0.0102(8) 0.0003(8) -0.0130(8)
P2 0.0363(11) 0.0411(12) 0.0507(12) -0.0129(9) 0.0098(9) -0.0187(9)
P3 0.0344(10) 0.0348(11) 0.0427(11) -0.0091(8) 0.0029(8) -0.0105(8)
 
_geom_special_details
;
 All esds (except the esd in the dihedral angle between two l.s. planes)
 are estimated using the full covariance matrix.  The cell esds are taken
 into account individually in the estimation of esds in distances, angles
 and torsion angles; correlations between esds in cell parameters are only
 used when they are defined by crystal symmetry.  An approximate (isotropic)
 treatment of cell esds is used for estimating esds involving l.s. planes.
;
 
loop_
 _geom_bond_atom_site_label_1
 _geom_bond_atom_site_label_2
 _geom_bond_distance
 _geom_bond_site_symmetry_2
 _geom_bond_publ_flag
C1 C5 1.422(12) . ?
C1 C2 1.443(10) . ?
C1 P1 1.839(8) . ?
C1 Fe1 2.044(8) . ?
C2 C3 1.404(12) . ?
C2 Fe1 2.036(7) . ?
C2 H2A 0.9500 . ?
C3 C4 1.418(11) . ?
C3 Fe1 2.028(7) . ?
C3 H3A 0.9500 . ?
C4 C5 1.436(10) . ?
C4 Fe1 2.048(7) . ?
C4 H4A 0.9500 . ?
C5 Fe1 2.013(7) . ?
C5 H5A 0.9500 . ?
C6 C7 1.426(11) . ?
C6 C10 1.450(12) . ?
C6 P3 1.836(8) . ?
C6 Fe1 2.056(8) . ?
C7 C8 1.411(12) . ?
C7 Fe1 2.040(8) . ?
C7 H7A 0.9500 . ?
C8 C9 1.435(11) . ?
C8 Fe1 2.046(7) . ?
C8 H8A 0.9500 . ?
C9 C10 1.435(10) . ?
C9 Fe1 2.043(7) . ?
C9 H9A 0.9500 . ?
C10 Fe1 2.033(7) . ?
C10 H10A 0.9500 . ?
C11 C14 1.514(12) . ?
C11 C12 1.535(11) . ?
C11 C13 1.548(11) . ?
C11 P1 1.873(7) . ?
C12 H12A 0.9800 . ?
C12 H12B 0.9800 . ?
C12 H12C 0.9800 . ?
C13 H13A 0.9800 . ?
C13 H13B 0.9800 . ?
C13 H13C 0.9800 . ?
C14 H14C 0.9800 . ?
C14 H14B 0.9800 . ?
C14 H14A 0.9800 . ?
C15 C17 1.515(13) . ?
C15 C18 1.528(12) . ?
C15 C16 1.528(14) . ?
C15 P3 1.886(8) . ?
C16 H16A 0.9800 . ?
C16 H16B 0.9800 . ?
C16 H16C 0.9800 . ?
C17 H17A 0.9800 . ?
C17 H17B 0.9800 . ?
C17 H17C 0.9800 . ?
C18 H18C 0.9800 . ?
C18 H18B 0.9800 . ?
C18 H18A 0.9800 . ?
C19 O1 1.31(2) . ?
C19 C20 1.48(3) . ?
C19 H19A 0.9900 . ?
C19 H19B 0.9900 . ?
C20 O2 1.53(2) . ?
C20 H20A 0.9900 . ?
C20 H20B 0.9900 . ?
C21 O2 1.35(3) . ?
C21 C22 1.48(3) . ?
C21 K1 3.416(14) . ?
C21 H21A 0.9900 . ?
C21 H21B 0.9900 . ?
C22 O3 1.469(18) . ?
C22 H22A 0.9900 . ?
C22 H22B 0.9900 . ?
C23 O3 1.352(18) . ?
C23 C24 1.47(2) . ?
C23 H23A 0.9900 . ?
C23 H23B 0.9900 . ?
C24 O4 1.403(14) . ?
C24 H24A 0.9900 . ?
C24 H24B 0.9900 . ?
C25 O4 1.388(15) . ?
C25 C26 1.425(17) . ?
C25 H25A 0.9900 . ?
C25 H25B 0.9900 . ?
C26 O5 1.452(13) . ?
C26 K1 3.532(9) . ?
C26 H26A 0.9900 . ?
C26 H26B 0.9900 . ?
C27 O5 1.367(15) . ?
C27 C28 1.488(18) . ?
C27 H27A 0.9900 . ?
C27 H27B 0.9900 . ?
C28 O6 1.413(13) . ?
C28 H28A 0.9900 . ?
C28 H28B 0.9900 . ?
C29 O6 1.299(15) . ?
C29 C30 1.38(2) . ?
C29 H29A 0.9900 . ?
C29 H29B 0.9900 . ?
C30 O1 1.483(19) . ?
C30 H30B 0.9900 . ?
C30 H30A 0.9900 . ?
K1 O5 2.748(8) . ?
K1 O3 2.787(8) . ?
K1 O2 2.888(8) . ?
K1 O1 2.893(10) . ?
K1 O6 2.933(9) . ?
K1 O4 3.039(8) . ?
K1 P3 3.333(3) . ?
K1 P1 3.581(3) . ?
P1 P2 2.187(3) . ?
P2 P3 2.193(3) . ?
 
loop_
 _geom_angle_atom_site_label_1
 _geom_angle_atom_site_label_2
 _geom_angle_atom_site_label_3
 _geom_angle
 _geom_angle_site_symmetry_1
 _geom_angle_site_symmetry_3
 _geom_angle_publ_flag
C5 C1 C2 106.2(7) . . ?
C5 C1 P1 130.8(5) . . ?
C2 C1 P1 122.6(7) . . ?
C5 C1 Fe1 68.3(4) . . ?
C2 C1 Fe1 69.0(4) . . ?
P1 C1 Fe1 122.0(4) . . ?
C3 C2 C1 108.7(7) . . ?
C3 C2 Fe1 69.5(4) . . ?
C1 C2 Fe1 69.6(4) . . ?
C3 C2 H2A 125.7 . . ?
C1 C2 H2A 125.7 . . ?
Fe1 C2 H2A 126.9 . . ?
C2 C3 C4 109.1(6) . . ?
C2 C3 Fe1 70.1(4) . . ?
C4 C3 Fe1 70.4(4) . . ?
C2 C3 H3A 125.4 . . ?
C4 C3 H3A 125.4 . . ?
Fe1 C3 H3A 125.6 . . ?
C3 C4 C5 106.7(7) . . ?
C3 C4 Fe1 68.9(4) . . ?
C5 C4 Fe1 68.0(4) . . ?
C3 C4 H4A 126.7 . . ?
C5 C4 H4A 126.7 . . ?
Fe1 C4 H4A 128.0 . . ?
C1 C5 C4 109.3(6) . . ?
C1 C5 Fe1 70.6(4) . . ?
C4 C5 Fe1 70.6(4) . . ?
C1 C5 H5A 125.4 . . ?
C4 C5 H5A 125.4 . . ?
Fe1 C5 H5A 125.0 . . ?
C7 C6 C10 106.0(7) . . ?
C7 C6 P3 123.6(7) . . ?
C10 C6 P3 130.3(6) . . ?
C7 C6 Fe1 69.0(4) . . ?
C10 C6 Fe1 68.4(4) . . ?
P3 C6 Fe1 124.4(4) . . ?
C8 C7 C6 110.2(7) . . ?
C8 C7 Fe1 70.0(4) . . ?
C6 C7 Fe1 70.2(5) . . ?
C8 C7 H7A 124.9 . . ?
C6 C7 H7A 124.9 . . ?
Fe1 C7 H7A 126.5 . . ?
C7 C8 C9 107.9(6) . . ?
C7 C8 Fe1 69.6(4) . . ?
C9 C8 Fe1 69.4(4) . . ?
C7 C8 H8A 126.1 . . ?
C9 C8 H8A 126.1 . . ?
Fe1 C8 H8A 126.6 . . ?
C8 C9 C10 107.4(7) . . ?
C8 C9 Fe1 69.6(4) . . ?
C10 C9 Fe1 69.0(4) . . ?
C8 C9 H9A 126.3 . . ?
C10 C9 H9A 126.3 . . ?
Fe1 C9 H9A 126.7 . . ?
C9 C10 C6 108.6(7) . . ?
C9 C10 Fe1 69.8(4) . . ?
C6 C10 Fe1 70.1(4) . . ?
C9 C10 H10A 125.7 . . ?
C6 C10 H10A 125.7 . . ?
Fe1 C10 H10A 126.0 . . ?
C14 C11 C12 109.2(7) . . ?
C14 C11 C13 109.6(7) . . ?
C12 C11 C13 107.3(7) . . ?
C14 C11 P1 116.3(5) . . ?
C12 C11 P1 107.9(6) . . ?
C13 C11 P1 106.1(5) . . ?
C11 C12 H12A 109.5 . . ?
C11 C12 H12B 109.5 . . ?
H12A C12 H12B 109.5 . . ?
C11 C12 H12C 109.5 . . ?
H12A C12 H12C 109.5 . . ?
H12B C12 H12C 109.5 . . ?
C11 C13 H13A 109.5 . . ?
C11 C13 H13B 109.5 . . ?
H13A C13 H13B 109.5 . . ?
C11 C13 H13C 109.5 . . ?
H13A C13 H13C 109.5 . . ?
H13B C13 H13C 109.5 . . ?
C11 C14 H14C 109.5 . . ?
C11 C14 H14B 109.5 . . ?
H14C C14 H14B 109.5 . . ?
C11 C14 H14A 109.5 . . ?
H14C C14 H14A 109.5 . . ?
H14B C14 H14A 109.5 . . ?
C17 C15 C18 108.5(8) . . ?
C17 C15 C16 109.5(8) . . ?
C18 C15 C16 109.6(8) . . ?
C17 C15 P3 108.0(6) . . ?
C18 C15 P3 106.1(6) . . ?
C16 C15 P3 115.0(6) . . ?
C15 C16 H16A 109.5 . . ?
C15 C16 H16B 109.5 . . ?
H16A C16 H16B 109.5 . . ?
C15 C16 H16C 109.5 . . ?
H16A C16 H16C 109.5 . . ?
H16B C16 H16C 109.5 . . ?
C15 C17 H17A 109.5 . . ?
C15 C17 H17B 109.5 . . ?
H17A C17 H17B 109.5 . . ?
C15 C17 H17C 109.5 . . ?
H17A C17 H17C 109.5 . . ?
H17B C17 H17C 109.5 . . ?
C15 C18 H18C 109.5 . . ?
C15 C18 H18B 109.5 . . ?
H18C C18 H18B 109.5 . . ?
C15 C18 H18A 109.5 . . ?
H18C C18 H18A 109.5 . . ?
H18B C18 H18A 109.5 . . ?
O1 C19 C20 112.5(16) . . ?
O1 C19 H19A 109.1 . . ?
C20 C19 H19A 109.1 . . ?
O1 C19 H19B 109.1 . . ?
C20 C19 H19B 109.1 . . ?
H19A C19 H19B 107.8 . . ?
C19 C20 O2 109.8(10) . . ?
C19 C20 H20A 109.7 . . ?
O2 C20 H20A 109.7 . . ?
C19 C20 H20B 109.7 . . ?
O2 C20 H20B 109.7 . . ?
H20A C20 H20B 108.2 . . ?
O2 C21 C22 104.9(13) . . ?
O2 C21 K1 56.1(6) . . ?
C22 C21 K1 88.3(8) . . ?
O2 C21 H21A 110.8 . . ?
C22 C21 H21A 110.8 . . ?
K1 C21 H21A 160.0 . . ?
O2 C21 H21B 110.8 . . ?
C22 C21 H21B 110.8 . . ?
K1 C21 H21B 67.8 . . ?
H21A C21 H21B 108.8 . . ?
O3 C22 C21 109.7(10) . . ?
O3 C22 H22A 109.7 . . ?
C21 C22 H22A 109.7 . . ?
O3 C22 H22B 109.7 . . ?
C21 C22 H22B 109.7 . . ?
H22A C22 H22B 108.2 . . ?
O3 C23 C24 106.3(10) . . ?
O3 C23 H23A 110.5 . . ?
C24 C23 H23A 110.5 . . ?
O3 C23 H23B 110.5 . . ?
C24 C23 H23B 110.5 . . ?
H23A C23 H23B 108.7 . . ?
O4 C24 C23 110.0(12) . . ?
O4 C24 H24A 109.7 . . ?
C23 C24 H24A 109.7 . . ?
O4 C24 H24B 109.7 . . ?
C23 C24 H24B 109.7 . . ?
H24A C24 H24B 108.2 . . ?
O4 C25 C26 115.8(11) . . ?
O4 C25 H25A 108.3 . . ?
C26 C25 H25A 108.3 . . ?
O4 C25 H25B 108.3 . . ?
C26 C25 H25B 108.3 . . ?
H25A C25 H25B 107.4 . . ?
C25 C26 O5 113.1(9) . . ?
C25 C26 K1 86.4(6) . . ?
O5 C26 K1 46.7(4) . . ?
C25 C26 H26A 109.0 . . ?
O5 C26 H26A 109.0 . . ?
K1 C26 H26A 155.6 . . ?
C25 C26 H26B 109.0 . . ?
O5 C26 H26B 109.0 . . ?
K1 C26 H26B 83.6 . . ?
H26A C26 H26B 107.8 . . ?
O5 C27 C28 109.2(10) . . ?
O5 C27 H27A 109.8 . . ?
C28 C27 H27A 109.8 . . ?
O5 C27 H27B 109.8 . . ?
C28 C27 H27B 109.8 . . ?
H27A C27 H27B 108.3 . . ?
O6 C28 C27 110.2(9) . . ?
O6 C28 H28A 109.6 . . ?
C27 C28 H28A 109.6 . . ?
O6 C28 H28B 109.6 . . ?
C27 C28 H28B 109.6 . . ?
H28A C28 H28B 108.1 . . ?
O6 C29 C30 121.8(15) . . ?
O6 C29 H29A 106.9 . . ?
C30 C29 H29A 106.9 . . ?
O6 C29 H29B 106.9 . . ?
C30 C29 H29B 106.9 . . ?
H29A C29 H29B 106.7 . . ?
C29 C30 O1 110.5(11) . . ?
C29 C30 H30B 109.6 . . ?
O1 C30 H30B 109.6 . . ?
C29 C30 H30A 109.6 . . ?
O1 C30 H30A 109.6 . . ?
H30B C30 H30A 108.1 . . ?
C5 Fe1 C3 69.0(3) . . ?
C5 Fe1 C10 105.5(3) . . ?
C3 Fe1 C10 155.3(4) . . ?
C5 Fe1 C2 68.9(3) . . ?
C3 Fe1 C2 40.4(3) . . ?
C10 Fe1 C2 162.0(3) . . ?
C5 Fe1 C7 155.1(3) . . ?
C3 Fe1 C7 126.3(3) . . ?
C10 Fe1 C7 68.7(3) . . ?
C2 Fe1 C7 108.8(3) . . ?
C5 Fe1 C9 123.9(3) . . ?
C3 Fe1 C9 120.6(3) . . ?
C10 Fe1 C9 41.2(3) . . ?
C2 Fe1 C9 156.0(3) . . ?
C7 Fe1 C9 68.6(3) . . ?
C5 Fe1 C1 41.0(3) . . ?
C3 Fe1 C1 69.2(3) . . ?
C10 Fe1 C1 123.3(3) . . ?
C2 Fe1 C1 41.4(3) . . ?
C7 Fe1 C1 120.6(3) . . ?
C9 Fe1 C1 161.0(3) . . ?
C5 Fe1 C8 162.2(4) . . ?
C3 Fe1 C8 108.4(3) . . ?
C10 Fe1 C8 69.1(3) . . ?
C2 Fe1 C8 121.3(3) . . ?
C7 Fe1 C8 40.4(3) . . ?
C9 Fe1 C8 41.1(3) . . ?
C1 Fe1 C8 156.0(4) . . ?
C5 Fe1 C4 41.4(3) . . ?
C3 Fe1 C4 40.7(3) . . ?
C10 Fe1 C4 119.4(3) . . ?
C2 Fe1 C4 68.5(3) . . ?
C7 Fe1 C4 162.7(3) . . ?
C9 Fe1 C4 106.6(3) . . ?
C1 Fe1 C4 69.4(3) . . ?
C8 Fe1 C4 125.2(3) . . ?
C5 Fe1 C6 118.9(3) . . ?
C3 Fe1 C6 162.4(4) . . ?
C10 Fe1 C6 41.5(3) . . ?
C2 Fe1 C6 124.9(3) . . ?
C7 Fe1 C6 40.7(3) . . ?
C9 Fe1 C6 69.7(3) . . ?
C1 Fe1 C6 105.7(3) . . ?
C8 Fe1 C6 69.1(3) . . ?
C4 Fe1 C6 154.9(3) . . ?
O5 K1 O3 112.7(3) . . ?
O5 K1 O2 154.5(3) . . ?
O3 K1 O2 57.4(4) . . ?
O5 K1 O1 117.0(3) . . ?
O3 K1 O1 114.7(3) . . ?
O2 K1 O1 59.3(4) . . ?
O5 K1 O6 57.7(3) . . ?
O3 K1 O6 139.5(2) . . ?
O2 K1 O6 112.4(3) . . ?
O1 K1 O6 59.4(3) . . ?
O5 K1 O4 60.8(3) . . ?
O3 K1 O4 55.2(3) . . ?
O2 K1 O4 99.2(3) . . ?
O1 K1 O4 124.7(3) . . ?
O6 K1 O4 93.3(2) . . ?
O5 K1 P3 92.89(19) . . ?
O3 K1 P3 124.19(19) . . ?
O2 K1 P3 112.22(19) . . ?
O1 K1 P3 92.89(18) . . ?
O6 K1 P3 96.30(17) . . ?
O4 K1 P3 140.27(19) . . ?
O5 K1 C21 157.0(5) . . ?
O3 K1 C21 44.4(5) . . ?
O2 K1 C21 22.9(5) . . ?
O1 K1 C21 79.4(6) . . ?
O6 K1 C21 135.3(5) . . ?
O4 K1 C21 96.9(4) . . ?
P3 K1 C21 102.8(3) . . ?
O5 K1 C26 22.6(3) . . ?
O3 K1 C26 90.3(3) . . ?
O2 K1 C26 140.9(3) . . ?
O1 K1 C26 134.4(3) . . ?
O6 K1 C26 76.6(2) . . ?
O4 K1 C26 41.7(2) . . ?
P3 K1 C26 103.96(18) . . ?
C21 K1 C26 134.6(5) . . ?
O5 K1 P1 89.7(2) . . ?
O3 K1 P1 78.46(19) . . ?
O2 K1 P1 109.1(2) . . ?
O1 K1 P1 138.1(2) . . ?
O6 K1 P1 135.16(18) . . ?
O4 K1 P1 95.93(18) . . ?
P3 K1 P1 51.81(6) . . ?
C21 K1 P1 86.9(4) . . ?
C26 K1 P1 81.74(18) . . ?
C19 O1 C30 116.5(14) . . ?
C19 O1 K1 119.6(12) . . ?
C30 O1 K1 114.7(7) . . ?
C21 O2 C20 114.4(14) . . ?
C21 O2 K1 101.0(8) . . ?
C20 O2 K1 107.0(8) . . ?
C23 O3 C22 113.6(12) . . ?
C23 O3 K1 126.9(8) . . ?
C22 O3 K1 116.3(9) . . ?
C25 O4 C24 114.2(11) . . ?
C25 O4 K1 108.7(7) . . ?
C24 O4 K1 101.4(6) . . ?
C27 O5 C26 111.1(9) . . ?
C27 O5 K1 124.2(8) . . ?
C26 O5 K1 110.7(6) . . ?
C29 O6 C28 119.4(10) . . ?
C29 O6 K1 108.6(8) . . ?
C28 O6 K1 111.0(7) . . ?
C1 P1 C11 99.2(4) . . ?
C1 P1 P2 103.9(3) . . ?
C11 P1 P2 104.2(3) . . ?
C1 P1 K1 126.4(3) . . ?
C11 P1 K1 126.9(3) . . ?
P2 P1 K1 90.95(10) . . ?
P1 P2 P3 87.51(10) . . ?
C6 P3 C15 101.1(4) . . ?
C6 P3 P2 107.1(3) . . ?
C15 P3 P2 103.7(3) . . ?
C6 P3 K1 121.4(3) . . ?
C15 P3 K1 123.5(3) . . ?
P2 P3 K1 97.67(10) . . ?
 
_refine_diff_density_max    1.739
_refine_diff_density_min   -0.625
_refine_diff_density_rms    0.172

_shelx_res_file
;
TITL STEFAN ISENBERG, -173DEGC, AP
    C:\Daten\Struktur\Pietschnig\Borucki\sv0485\disorder_free\sv0485.res
    created by SHELXL-2017/1 at 13:33:44 on 29-May-2018
CELL  1.54186 10.79100 10.77530 16.83690 73.90400 71.66300 69.62000
ZERR 2  0.00100  0.00100  0.00160  0.00700  0.00700  0.00700
LATT 1
SFAC C H FE K O P
UNIT 60 100 2 2 12 6
TEMP -173
L.S. 10
ACTA
BOND $H
SIZE    0.020   0.090   0.170
OMIT  -6  138
FMAP 2
PLAN 20
WGHT    0.198200    6.743000
FVAR       0.40859
C1    1    0.756509    0.241099    0.444908    11.00000    0.03467    0.04014 =
         0.04350   -0.01723    0.01130   -0.02005
C2    1    0.624473    0.224497    0.492265    11.00000    0.02787    0.03626 =
         0.05129   -0.02064    0.00792   -0.01305
AFIX  43
H2A   2    0.540649    0.274051    0.477049    11.00000   -1.20000
AFIX   0
C3    1    0.640434    0.122942    0.564573    11.00000    0.02836    0.04174 =
         0.04835   -0.02135    0.01109   -0.02140
AFIX  43
H3A   2    0.569163    0.091564    0.605783    11.00000   -1.20000
AFIX   0
C4    1    0.779911    0.074699    0.566263    11.00000    0.02570    0.03486 =
         0.03389   -0.01393    0.00216   -0.01036
AFIX  43
H4A   2    0.818524    0.007882    0.609014    11.00000   -1.20000
AFIX   0
C5    1    0.851479    0.146453    0.490801    11.00000    0.02252    0.03983 =
         0.05199   -0.02388    0.00801   -0.01746
AFIX  43
H5A   2    0.947223    0.132816    0.474169    11.00000   -1.20000
AFIX   0
C6    1    0.815457    0.009969    0.335918    11.00000    0.04241    0.03154 =
         0.05022   -0.01605    0.00597   -0.01378
C7    1    0.680686   -0.000445    0.375408    11.00000    0.02950    0.04296 =
         0.04478   -0.02080   -0.00116   -0.01422
AFIX  43
H7A   2    0.602581    0.051650    0.354147    11.00000   -1.20000
AFIX   0
C8    1    0.680144   -0.099337    0.450637    11.00000    0.03059    0.03738 =
         0.05785   -0.02416    0.00739   -0.01661
AFIX  43
H8A   2    0.602697   -0.124624    0.488134    11.00000   -1.20000
AFIX   0
C9    1    0.817336   -0.154931    0.460451    11.00000    0.03018    0.02986 =
         0.04425   -0.01117    0.00833   -0.01104
AFIX  43
H9A   2    0.847273   -0.223831    0.505352    11.00000   -1.20000
AFIX   0
C10   1    0.901009   -0.087271    0.389934    11.00000    0.02803    0.03326 =
         0.04629   -0.02092    0.00642   -0.01240
AFIX  43
H10A  2    0.996438   -0.103472    0.380266    11.00000   -1.20000
AFIX   0
C11   1    0.829992    0.482803    0.370031    11.00000    0.03829    0.02606 =
         0.05693   -0.01291   -0.01069   -0.01053
C12   1    0.867209    0.583471    0.288430    11.00000    0.06829    0.04022 =
         0.05924   -0.00293   -0.01023   -0.03745
AFIX 137
H12A  2    0.881712    0.658394    0.303114    11.00000   -1.20000
H12B  2    0.792861    0.618218    0.259326    11.00000   -1.20000
H12C  2    0.950821    0.538081    0.250743    11.00000   -1.20000
AFIX   0
C13   1    0.698675    0.559885    0.427442    11.00000    0.03810    0.03777 =
         0.07618   -0.02362   -0.00251   -0.01296
AFIX 137
H13A  2    0.627982    0.603064    0.395474    11.00000   -1.20000
H13B  2    0.718006    0.628845    0.445456    11.00000   -1.20000
H13C  2    0.666896    0.496549    0.477744    11.00000   -1.20000
AFIX   0
C14   1    0.944582    0.430600    0.415178    11.00000    0.04126    0.04623 =
         0.06232   -0.01816   -0.00194   -0.02249
AFIX 137
H14C  2    0.916453    0.375443    0.470793    11.00000   -1.20000
H14B  2    0.965962    0.506866    0.423227    11.00000   -1.20000
H14A  2    1.025489    0.375708    0.380732    11.00000   -1.20000
AFIX   0
C15   1    0.989133    0.019180    0.166516    11.00000    0.04950    0.03273 =
         0.03681   -0.01037    0.00508   -0.00815
C16   1    1.117544   -0.064383    0.197802    11.00000    0.04685    0.08029 =
         0.07742   -0.03933    0.00957    0.00347
AFIX 137
H16A  2    1.184062   -0.112803    0.153566    11.00000   -1.20000
H16B  2    1.094124   -0.129352    0.249592    11.00000   -1.20000
H16C  2    1.156791   -0.004579    0.210309    11.00000   -1.20000
AFIX   0
C17   1    0.922320   -0.074069    0.153893    11.00000    0.08037    0.04875 =
         0.04968   -0.01976   -0.00390   -0.01917
AFIX 137
H17A  2    0.899680   -0.135373    0.207807    11.00000   -1.20000
H17B  2    0.985169   -0.126567    0.110656    11.00000   -1.20000
H17C  2    0.838879   -0.020604    0.135049    11.00000   -1.20000
AFIX   0
C18   1    1.027262    0.110791    0.081119    11.00000    0.08277    0.06161 =
         0.05087   -0.01893    0.01723   -0.03141
AFIX 137
H18C  2    0.944587    0.165503    0.061721    11.00000   -1.20000
H18B  2    1.088638    0.055546    0.038976    11.00000   -1.20000
H18A  2    1.073017    0.170081    0.087888    11.00000   -1.20000
AFIX   0
C19   1    0.741011    0.423042   -0.060036    11.00000    0.06828    0.12441 =
         0.10344   -0.04162    0.02135    0.03956
AFIX  23
H19A  2    0.665696    0.492430   -0.082786    11.00000   -1.20000
H19B  2    0.799541    0.370643   -0.105062    11.00000   -1.20000
AFIX   0
C20   1    0.822433    0.490580   -0.039334    11.00000    0.05302    0.10500 =
         0.11609    0.04110    0.05683    0.01399
AFIX  23
H20A  2    0.862532    0.546996   -0.091700    11.00000   -1.20000
H20B  2    0.897798    0.421957   -0.016238    11.00000   -1.20000
AFIX   0
C21   1    0.799602    0.627259    0.059994    11.00000    0.07535    0.13516 =
         0.21734    0.10380   -0.04159   -0.06718
AFIX  23
H21A  2    0.866423    0.667467    0.014523    11.00000   -1.20000
H21B  2    0.848403    0.554674    0.099672    11.00000   -1.20000
AFIX   0
C22   1    0.693064    0.731197    0.105893    11.00000    0.14171    0.07145 =
         0.15560    0.05200   -0.10446   -0.06922
AFIX  23
H22A  2    0.736144    0.776915    0.128573    11.00000   -1.20000
H22B  2    0.641258    0.799754    0.066129    11.00000   -1.20000
AFIX   0
C23   1    0.492710    0.756935    0.216998    11.00000    0.12827    0.05567 =
         0.17378   -0.02658   -0.09315   -0.01940
AFIX  23
H23A  2    0.438565    0.820177    0.176778    11.00000   -1.20000
H23B  2    0.524229    0.809529    0.242406    11.00000   -1.20000
AFIX   0
C24   1    0.410258    0.676976    0.283998    11.00000    0.06388    0.09402 =
         0.13383   -0.07172   -0.03597   -0.00074
AFIX  23
H24A  2    0.466937    0.610808    0.321940    11.00000   -1.20000
H24B  2    0.333554    0.737163    0.318764    11.00000   -1.20000
AFIX   0
C25   1    0.269910    0.540861    0.304790    11.00000    0.08994    0.09556 =
         0.08067   -0.02829   -0.00446   -0.03773
AFIX  23
H25A  2    0.211052    0.530168    0.273864    11.00000   -1.20000
H25B  2    0.210303    0.597574    0.347367    11.00000   -1.20000
AFIX   0
C26   1    0.331187    0.411280    0.349030    11.00000    0.04592    0.06965 =
         0.05035   -0.01132    0.00440   -0.02534
AFIX  23
H26A  2    0.258848    0.375652    0.392046    11.00000   -1.20000
H26B  2    0.391181    0.420753    0.379632    11.00000   -1.20000
AFIX   0
C27   1    0.328745    0.259744    0.274858    11.00000    0.08603    0.08635 =
         0.09096    0.01923   -0.02583   -0.05296
AFIX  23
H27A  2    0.253452    0.332055    0.253800    11.00000   -1.20000
H27B  2    0.288664    0.202986    0.327035    11.00000   -1.20000
AFIX   0
C28   1    0.411254    0.176300    0.208733    11.00000    0.07540    0.06025 =
         0.07613   -0.01236   -0.00617   -0.03157
AFIX  23
H28A  2    0.484013    0.101759    0.230921    11.00000   -1.20000
H28B  2    0.352482    0.136457    0.194830    11.00000   -1.20000
AFIX   0
C29   1    0.546330    0.201408    0.069137    11.00000    0.04602    0.14495 =
         0.06742   -0.00695   -0.00542   -0.00939
AFIX  23
H29A  2    0.492672    0.155029    0.055850    11.00000   -1.20000
H29B  2    0.624187    0.130327    0.088152    11.00000   -1.20000
AFIX   0
C30   1    0.599763    0.276291   -0.006627    11.00000    0.07191    0.20102 =
         0.07340   -0.08980   -0.00577   -0.01847
AFIX  23
H30B  2    0.524730    0.345912   -0.029533    11.00000   -1.20000
H30A  2    0.652299    0.216854   -0.048731    11.00000   -1.20000
AFIX   0
FE1   3    0.752964    0.048082    0.457633    11.00000    0.02637    0.02805 =
         0.03999   -0.01104    0.00514   -0.01356
K1    4    0.618550    0.403819    0.174633    11.00000    0.03426    0.04356 =
         0.05732   -0.01117    0.00661   -0.01266
O1    5    0.689958    0.342004    0.006472    11.00000    0.08145    0.11238 =
         0.06970   -0.01910   -0.00138    0.02857
O2    5    0.731330    0.578735    0.026393    11.00000    0.05065    0.17000 =
         0.08318    0.04850   -0.00924   -0.04770
O3    5    0.600174    0.667645    0.176298    11.00000    0.10033    0.05174 =
         0.12781   -0.00366   -0.05424   -0.02616
O4    5    0.359471    0.609094    0.247019    11.00000    0.05608    0.09551 =
         0.09584   -0.04288   -0.00028   -0.02070
O5    5    0.410534    0.315173    0.293111    11.00000    0.07201    0.08543 =
         0.09051    0.00291   -0.00618   -0.04073
O6    5    0.470138    0.256382    0.134384    11.00000    0.07216    0.07133 =
         0.08738   -0.02491   -0.01441   -0.01513
P1    6    0.783091    0.352851    0.340314    11.00000    0.03178    0.03200 =
         0.04874   -0.01024    0.00027   -0.01303
P2    6    0.975304    0.239177    0.267016    11.00000    0.03632    0.04114 =
         0.05070   -0.01286    0.00978   -0.01870
P3    6    0.857568    0.133279    0.239414    11.00000    0.03442    0.03479 =
         0.04272   -0.00910    0.00286   -0.01049
HKLF 4


REM  STEFAN ISENBERG, -173DEGC, AP
REM R1 =  0.1104 for    4302 Fo > 4sig(Fo)  and  0.1455 for all    6198 data
REM    376 parameters refined using      0 restraints

END

WGHT      0.1986      6.6852

REM Highest difference peak  1.739,  deepest hole -0.625,  1-sigma level  0.172
Q1    1   0.9139  0.3014  0.3520  11.00000  0.05    1.74
Q2    1   0.8321  0.0154  0.4720  11.00000  0.05    1.46
Q3    1   0.5652  0.4296  0.1374  11.00000  0.05    1.41
Q4    1   0.7068  0.0382  0.4209  11.00000  0.05    1.40
Q5    1   0.3752  0.5056  0.2879  11.00000  0.05    1.39
Q6    1   0.9810  0.0698  0.2566  11.00000  0.05    1.35
Q7    1   0.4184  0.2542  0.2440  11.00000  0.05    1.35
Q8    1   0.8375  0.2749  0.2548  11.00000  0.05    1.12
Q9    1   0.7781  0.1069  0.4163  11.00000  0.05    1.08
Q10   1   0.6686  0.3386 -0.0513  11.00000  0.05    0.92
Q11   1   0.3793  0.5854  0.3274  11.00000  0.05    0.91
Q12   1   0.5165  0.1371  0.1361  11.00000  0.05    0.90
Q13   1   0.9185  0.1836  0.2583  11.00000  0.05    0.81
Q14   1   0.7417  0.3984 -0.0058  11.00000  0.05    0.76
Q15   1   0.7414 -0.0164  0.4988  11.00000  0.05    0.75
Q16   1   0.6502  0.1159  0.4590  11.00000  0.05    0.75
Q17   1   0.5857  0.7759  0.1433  11.00000  0.05    0.70
Q18   1   0.7179  0.0800  0.5412  11.00000  0.05    0.68
Q19   1   0.6798  0.4207  0.2067  11.00000  0.05    0.68
Q20   1   0.2910  0.3410  0.3066  11.00000  0.05    0.67
;
_shelx_res_checksum   56228

_shelx_hkl_file
;
  -4  -1  -5  353.08    3.07   0
  -4   1  -4   41.52    1.65   0
  -2  -3  -5   23.94    1.58   0
  -1  -4  -7    2.01    1.44   0
   0  -3  -4   12.33    1.33   0
  -4  -2  -6  415.08    3.78   0
  -3  -3  -6  129.80    2.29   0
   1  -3  -4  364.17    1.77   0
   2   5   2    1.84    1.28   0
   5   1   0   19.56    1.22   0
   5   2   1   65.97    1.78   0
   0   2   1 1063.93    2.05   0
   0   4   1   10.81    1.13   0
   4   3   2 1065.03    4.38   0
  -4   0  -4  155.32    2.34   0
  -3   2  -2  178.04    1.38   0
  -1  -3  -4  117.70    1.72   0
  -1   4   0  183.34    1.23   0
   1   1   1   28.83    0.87   0
   2   3   2   55.75    1.48   0
   2   4   2  576.56    2.98   0
   3   1   1    7.93    1.17   0
   3   3   2  246.75    2.19   0
  -3  -2  -4  101.13    1.98   0
  -3  -1  -3  259.43    2.44   0
  -3   1  -2   26.62    1.25   0
  -2  -2  -3    7.47    1.86   0
  -2  -1  -2 1603.42    3.74   0
  -1  -4  -6   15.75    1.47   0
   0  -4  -6  178.12    2.04   0
   0  -2  -2   29.73    1.06   0
   0   3   1  127.33    1.20   0
   3   0   0  172.86    1.35   0
   3   4   2 1429.47    5.02   0
   1   5   1  222.70    2.42   0
   2   1   1  927.76    2.57   0
  -4  -2  -5   12.99    1.55   0
  -3  -3  -5 1479.63    5.66   0
  -2  -4  -6    2.66    1.68   0
   4   2   1  705.94    3.32   0
  -4  -1  -4   26.50    1.81   0
   5   2   0   34.44    1.85   0
  -2  -3  -4 1357.45    4.87   0
   4   0  -1   74.89    1.43   0
   0   5   0   52.93    1.51   0
   2   5   1  473.00    3.26   0
   4   1   0   82.81    1.56   0
   4   3   1   22.91    1.68   0
  -3  -4  -6  186.48    2.72   0
  -3   0  -2  527.09    2.46   0
   1   4   1 1514.84    4.41   0
   3   2   1  190.59    2.01   0
  -1  -4  -5  286.49    2.75   0
  -1  -2  -2   51.77    1.63   0
  -4   1  -3   39.47    1.44   0
  -2   0  -1 7288.60    5.95   0
  -1   3   0 1218.83    2.24   0
   0  -4  -5  768.92    3.25   0
   1   2   1   73.69    1.42   0
   2   0   0 1930.46    2.93   0
   3   4   1  112.98    2.11   0
  -4  -3  -5   52.35    2.35   0
  -4   0  -3  211.40    2.70   0
  -3  -2  -3   36.28    1.91   0
  -2  -4  -5   39.13    1.91   0
  -1  -1  -1   22.56    0.76   0
   0  -3  -3  154.58    1.60   0
   1   3   1  520.60    2.37   0
   2   2   1  290.92    2.18   0
   2   4   1  366.45    2.61   0
   3   3   1  210.42    2.23   0
  -4  -2  -4   99.61    2.60   0
  -3  -3  -4  145.18    2.57   0
  -1  -3  -3  762.33    3.09   0
   2  -1  -1 1943.83    2.15   0
   1   5   0    4.16    1.79   0
   2   3   1  176.98    2.00   0
   4  -1  -3  450.87    2.24   0
   4   2   0   19.07    1.47   0
  -4  -1  -3 1116.25    4.86   0
  -3  -4  -5  431.17    3.92   0
  -3  -1  -2  121.55    2.12   0
  -2   3  -1   44.58    0.53   0
   2   5   0   61.79    1.99   0
   3   1   0  198.39    1.83   0
   4   3   0    8.39    1.75   0
  -2  -3  -3   77.55    1.95   0
  -2  -2  -2  707.28    3.10   0
   0   4   0  183.00    1.74   0
   4   1  -1   21.44    1.78   0
   1  -4  -5   31.33    1.07   0
   4   0  -2  727.29    3.21   0
  -1  -5  -6   51.41    2.12   0
  -1  -4  -4   26.23    1.59   0
   0   5  -1   12.71    1.16   0
   1  -3  -3  255.02    1.38   0
   3   4   0 1062.29    4.84   0
  -4  -3  -4  320.01    3.77   0
  -2  -4  -4   19.19    1.62   0
   3   0  -1    2.55    1.24   0
   1   4   0  303.72    2.40   0
   2   4   0  338.20    2.74   0
   3   2   0  301.93    2.19   0
   3   3   0   15.07    1.66   0
   4   2  -1  142.43    2.22   0
  -4  -2  -3  122.65    2.36   0
  -3  -3  -3 1681.91    5.67   0
  -1   4  -1  168.09    1.55   0
   0  -4  -4  208.56    1.91   0
   1   5  -1  793.01    5.22   0
   4   3  -1  238.87    2.83   0
  -3  -4  -4 1379.58    6.17   0
  -2  -1  -1 1010.55    3.02   0
  -3  -2  -2    1.99    1.75   0
   2   1   0  351.49    2.13   0
  -2  -5  -5  682.95    4.76   0
   2   3   0 1215.58    4.16   0
   4   1  -2   45.63    1.73   0
   2   2   0  697.84    3.12   0
  -4   0  -2  778.12    3.45   0
  -1  -5  -5  350.47    2.83   0
   0   5  -2   79.06    2.29   0
   1   3   0  152.58    1.85   0
   4   0  -3   26.48    1.45   0
   4   2  -2  661.65    4.06   0
  -4  -3  -3  186.43    2.84   0
  -4  -1  -2   75.46    1.85   0
  -1  -3  -2    8.27    1.42   0
   3   1  -1  853.11    3.35   0
   3   3  -1 1084.08    4.63   0
  -5  -1  -3  436.10    3.92   0
  -5   0  -3   37.74    1.59   0
  -4   1  -2   90.17    1.40   0
  -3   0  -1   32.09    1.28   0
  -2  -4  -3   31.41    1.71   0
  -2  -3  -2   46.60    1.90   0
   2   4  -1    1.38    1.58   0
  -1  -4  -3  373.39    2.76   0
  -1  -2  -1   77.83    1.68   0
   1   4  -1   52.70    1.75   0
   3   2  -1  230.53    2.11   0
  -5  -2  -3   42.20    2.25   0
  -3  -4  -3  188.16    2.67   0
  -3   1  -1   82.65    1.07   0
   1   2   0 2234.96    4.25   0
   4   1  -3  224.41    2.65   0
  -4  -2  -2   53.97    1.92   0
  -3  -3  -2  289.03    2.77   0
  -3  -1  -1    7.55    1.49   0
  -2  -2  -1  313.66    2.51   0
   0   2   0  167.41    1.29   0
   1   1   0 4248.91    4.50   0
  -2  -5  -4  124.16    2.36   0
   0  -2  -1  838.39    2.19   0
   3   0  -2  704.27    3.03   0
   2   3  -1   68.01    2.01   0
   2   4  -2  597.43    4.00   0
   3   3  -2  230.66    2.82   0
  -1  -5  -4   65.86    2.04   0
  -1   0   0   60.71    0.72   0
  -1   4  -2  635.24    3.43   0
   3  -1  -3  995.03    3.20   0
   0  -4  -3    5.86    1.31   0
   1  -4  -4    1.76    0.72   0
   2   0  -1   17.90    1.04   0
   3   2  -2  456.27    3.23   0
  -4  -3  -2 1221.77    5.53   0
  -3  -2  -1  222.58    2.40   0
  -1   3  -1    9.66    1.00   0
   1   4  -2 1000.03    4.58   0
   2   2  -1 1841.32    4.87   0
   3   1  -2  102.05    1.88   0
   0   4  -2  164.23    2.39   0
   1   3  -1 1080.10    3.89   0
   2  -3  -4  532.57    1.17   0
   2   1  -1 1885.89    4.27   0
  -3  -4  -2 1680.96    6.16   0
   0   3  -1  109.26    1.53   0
   2   3  -2  566.49    3.53   0
  -6  -1  -3   63.05    2.49   0
  -4  -1  -1    6.79    1.84   0
  -2  -5  -3  136.23    2.40   0
  -2  -3  -1  200.93    2.37   0
   3   2  -3  148.10    2.47   0
  -1  -4  -2  224.90    2.51   0
   1   4  -3  102.96    2.46   0
  -4  -2  -1  750.58    3.96   0
  -4   0  -1  137.68    1.94   0
  -3  -3  -1  231.28    2.61   0
  -2   0   0 1893.57    3.19   0
  -1  -3  -1  584.51    2.79   0
  -1  -1   0 4169.75    4.66   0
   3   1  -3   53.92    1.92   0
  -2  -1   0  372.53    2.36   0
  -1   4  -3   52.33    1.58   0
   0  -5  -4  275.84    2.24   0
   0   4  -3   61.06    2.03   0
   3  -1  -4 1484.98    4.40   0
  -1  -5  -3   21.88    1.88   0
   1   2  -1   53.55    1.84   0
   2   2  -2  831.19    3.74   0
   2   3  -3    4.40    1.86   0
   1   3  -2   85.31    1.98   0
  -4  -3  -1   15.78    2.00   0
  -2   3  -2  521.55    2.20   0
   3   0  -4    8.94    1.64   0
   3   1  -4  374.06    3.22   0
  -3  -1   0  199.63    2.02   0
  -2  -2   0  776.68    3.37   0
   3  -1  -5    9.71    1.52   0
  -3  -4  -1  125.54    2.48   0
  -1   4  -4  120.75    2.25   0
   2   1  -2 1648.73    4.43   0
  -6  -1  -2  379.79    4.09   0
  -3  -2   0  431.73    2.94   0
  -2  -4  -1  337.79    2.88   0
  -1  -2   0 2303.69    4.46   0
   0   3  -2    1.64    1.40   0
   2   2  -3 1177.20    4.67   0
   3   0  -5  691.31    4.23   0
  -5  -1  -1  648.66    3.91   0
  -3   0   0  170.07    1.46   0
  -1   3  -2   23.25    1.59   0
   0  -4  -2  471.71    2.41   0
   1   3  -3  539.90    3.63   0
   2   0  -2   84.51    1.45   0
   3  -1  -6   29.60    1.74   0
   0   2  -1  592.33    2.33   0
   1   1  -1    4.27    1.38   0
  -4  -2   0   29.10    1.73   0
  -4   1  -1    4.41    0.82   0
  -3  -3   0   24.01    1.82   0
  -2  -3   0 1038.85    4.04   0
  -1  -4  -1 1292.95    4.31   0
   0  -1   0    9.11    0.63   0
   1   2  -2 2108.68    5.06   0
   1   3  -4   67.13    2.21   0
   2   2  -4  463.82    3.55   0
  -4  -1   0   60.63    1.74   0
   0   3  -3  316.28    3.07   0
   2   1  -3 1057.75    4.01   0
  -4  -3   0   13.04    1.95   0
   0  -5  -3  175.58    1.67   0
  -2   1   0   23.06    0.55   0
  -1   2  -1 1251.75    2.56   0
  -3  -4   0 1081.99    5.06   0
  -2  -5  -1  622.23    4.34   0
  -2   3  -3   30.43    1.33   0
  -1   3  -3 1690.79    5.42   0
   0   3  -4  767.82    4.23   0
   1   0  -1 2064.41    2.78   0
   1   2  -3  971.92    3.92   0
   2  -1  -3  504.14    2.25   0
   2   0  -3   48.57    1.44   0
   2   1  -4  701.44    3.71   0
  -4   0   0   17.92    1.23   0
  -2  -4   0  301.87    2.74   0
   2   1  -5   79.73    2.16   0
   0  -2   0  178.42    1.51   0
   0   3  -5  225.27    3.21   0
  -3  -2   1  337.67    2.66   0
  -2  -2   1 2031.11    5.02   0
  -2  -1   1 1938.85    4.27   0
  -1   3  -4   18.23    1.95   0
   1   2  -4  872.78    4.15   0
   2  -2  -4 2239.68    4.25   0
  -3  -1   1  832.35    3.31   0
   0   2  -2 2356.06    4.78   0
   1   1  -2  101.40    1.86   0
   2   0  -4  961.36    3.74   0
  -4  -2   1  161.88    2.31   0
  -3  -3   1  902.35    4.24   0
  -2   3  -4  131.55    1.93   0
  -1  -5  -1  234.69    2.57   0
  -1   3  -5    1.71    1.86   0
   1   2  -5   18.08    1.48   0
   2   0  -5  242.84    2.78   0
  -4  -3   1  228.91    2.78   0
  -2  -3   1   69.59    2.01   0
  -1  -4   0  294.22    2.40   0
   2  -1  -4   23.08    1.29   0
   2   0  -6    4.28    1.73   0
  -2   3  -5   21.80    1.55   0
  -1  -2   1   55.00    1.73   0
  -1  -1   1    4.63    1.28   0
  -1   1   1   82.49    1.62   0
  -1   1   5 2314.76    6.14   0
  -1   5   1   40.92    1.59   0
   0   0   6   24.95    1.71   0
   2   1  -3 1076.91    3.72   0
   3   1  -3   44.55    1.79   0
   2   0  -2  105.10    1.97   0
   2   3  -4  121.97    1.70   0
   3   0  -2  754.83    3.76   0
   4  -1   1    6.22    1.70   0
  -1   1   4  519.54    2.99   0
  -1   2   0  688.17    2.48   0
  -1   2   6 1561.11    6.35   0
   3  -1   0  274.80    2.49   0
   3   2  -4   90.14    2.31   0
  -1   1   2    3.08    1.66   0
  -1   1   3  140.50    2.04   0
  -1   3   0 1368.07    3.75   0
   4  -1   0  363.80    3.26   0
  -1   2   5   38.22    1.93   0
  -1   4   1  453.97    2.90   0
   0   0   5   30.94    1.18   0
   1   1  -3 1415.80    3.32   0
  -1   3   5    9.07    2.09   0
   0   1   7   21.80    1.71   0
   1  -1   1 1776.86    2.92   0
  -1   2   1  437.40    2.36   0
  -1   2   4  121.08    2.14   0
  -1   3   1   65.27    1.52   0
  -1   4   2  652.43    3.66   0
  -1   4   3  197.64    2.71   0
   0   5  -1    7.53    1.09   0
   1   0  -2  359.04    2.09   0
   3  -1  -1    8.23    1.68   0
   3   0  -3  174.60    2.37   0
   3   1  -4  349.50    3.01   0
  -1   2   2   42.54    1.68   0
  -1   2   3   37.25    1.74   0
  -1   3   4  424.88    3.56   0
   2  -1  -1 2296.52    5.03   0
   4  -1  -1  531.68    3.90   0
  -1   3   2  723.96    3.42   0
  -1   3   3  334.81    2.87   0
   0   0   4  785.71    2.55   0
   1   0   7  396.35    2.78   0
   2   0  -3   48.55    1.73   0
   2   1  -4  618.44    3.17   0
   2  -1   6   75.87    0.70   0
   3   3  -5  202.96    2.42   0
   0   1   6   89.59    1.88   0
   3  -1  -2  214.91    2.52   0
   3   2  -5   33.29    2.10   0
   1  -1   0   33.92    1.16   0
   0   0   3  116.41    1.43   0
   2  -1  -2 1060.10    3.88   0
   1   3  -4   37.16    0.84   0
   4  -2   2  592.03    4.11   0
   4  -2   3  198.21    2.52   0
   2   0   8   23.34    1.25   0
   2   2  -5   39.96    1.43   0
   3   1  -5   53.83    2.13   0
   4  -2   1   61.30    2.00   0
   0   1   5   29.85    1.63   0
   0   2   6  132.40    2.54   0
   1   0  -3  669.78    2.75   0
   2   0  -4  886.78    3.96   0
   3  -2   1   21.68    1.51   0
   3  -2   3  833.15    3.20   0
   3  -1  -3 1173.29    5.18   0
   4  -2   4    5.70    1.22   0
   0   0   2    3.90    0.87   0
   0   1  -2   82.72    0.62   0
   0   3  -2    2.56    0.57   0
   0   3   6  146.78    3.56   0
   0   5   1    3.56    1.29   0
   1  -1  -1   90.63    1.70   0
   1   0   6  906.80    3.30   0
   1   1  -4  290.86    2.00   0
   3  -2   0   49.44    1.72   0
   0   4  -1  100.42    1.36   0
   0   5   2    2.58    1.66   0
   0   5   3  163.66    2.98   0
   2  -1  -3  541.34    3.19   0
   2   1  -5   84.09    1.92   0
   2   1   9   -0.51    1.59   0
   3  -2  -1   22.25    1.74   0
   0   1   4    9.45    1.64   0
   0   2   5  746.88    3.87   0
   1   1   7  123.70    2.72   0
   3  -2   4    4.66    0.92   0
   0   3   5  585.67    4.03   0
   0   4   4  194.75    2.84   0
   2  -2   1  198.70    2.03   0
   1  -1  -2    1.18    1.75   0
   2  -2   0 3013.89    6.02   0
   2   0  -5  227.91    2.59   0
   3  -2  -2  173.16    2.60   0
   0   4   0  181.93    1.83   0
   0   4   3    7.35    1.77   0
   1   0  -4 1464.53    4.36   0
   2  -2  -1   26.20    1.64   0
   2  -2   2   88.60    1.38   0
   2  -1  -4   28.10    1.90   0
   0   2   4 3065.90    6.92   0
   0   3   4   12.18    1.78   0
   0   4   1   11.15    1.75   0
   0   4   2  531.38    3.29   0
   0   1   3 1556.43    3.83   0
   1   2   7  142.88    2.64   0
   2  -2  -2  542.60    3.28   0
   2   2  -6   81.26    1.85   0
   1  -1  -3  136.65    2.15   0
   2   1  -6   71.64    1.93   0
   0   3   3  166.76    2.36   0
   1   0   5    4.29    1.27   0
   1   1  -5   33.65    1.41   0
   1   2  -5   23.60    1.19   0
   2   0   7  236.57    2.41   0
   0   2   3  293.55    2.59   0
   0   3  -1   89.52    1.15   0
   1   1   6    5.09    1.75   0
   2  -2  -3  129.61    2.39   0
   2  -1  -5   36.02    2.06   0
   0   3   2  624.47    3.26   0
   2  -2   3  234.08    1.42   0
   0   0  -1  548.29    1.12   0
   1   0  -5  162.43    2.06   0
   0   1   2 1162.68    2.90   0
   0   3   0  267.00    1.71   0
   0   3   1  127.85    1.72   0
   1  -1  -4  428.19    3.03   0
   1   2   6  141.04    2.54   0
   1   3   6  100.53    2.86   0
   2  -2  -4 3082.97    8.67   0
   3   1   9    7.71    1.95   0
   2   2   8   36.40    2.41   0
   3  -3  -1   84.15    2.51   0
   3  -3   0  320.96    3.08   0
   3   0   8  132.34    2.91   0
   1   4   5  290.10    3.93   0
   1   5  -1  646.29    3.40   0
   1   5   3   17.78    1.99   0
   2   1  -7  739.87    5.00   0
   3  -3   1  300.29    2.77   0
   0   0  -2    3.85    0.83   0
   1  -2  -2   46.69    1.83   0
   1  -2  -1  507.21    2.65   0
   1  -2   0  639.78    2.60   0
   1  -1  -5 2046.20    6.11   0
   1   1  -6 1240.31    4.47   0
   1   5   0    2.71    1.53   0
   1   5   2  611.62    4.15   0
   0   1  -3 3697.67    3.41   0
   1  -2  -3   41.44    1.86   0
   1   0  -6   43.10    2.12   0
   1   1   5  220.45    2.17   0
   1   3   5  557.37    4.14   0
   1   5   1  165.11    2.42   0
   2   1   7   23.48    2.32   0
   0   1   1 6628.45    5.26   0
   1   4   4   30.08    2.11   0
   2  -3  -2  872.22    4.37   0
   2  -3  -1 1147.76    4.84   0
   1  -2  -4  101.97    2.22   0
   1   2   5   48.49    2.10   0
   2  -3  -3  466.49    3.73   0
   2  -3   0   76.15    1.83   0
  -8  -5   0  116.81    7.28   0
  -5  -5  -3  265.47    3.83   0
  -5  -4   2    2.88    4.66   0
  -5   1   8   18.76    5.39   0
  -3  -3   2  223.79    3.99   0
  -3   0   7  810.32    7.00   0
  -3  -1   6  440.37    5.56   0
  -1   1   6  406.38    3.76   0
   0   2   5  617.59    2.94   0
  -7  -4   3  227.14    7.67   0
  -6  -2   6    3.15    6.39   0
  -6  -1   7    9.77    5.84   0
  -3   1   8  486.42    5.81   0
  -2  -2   3 1377.01    6.31   0
  -8  -5   1    8.78    5.89   0
  -7  -5   1   62.86    7.05   0
  -5  -5  -1  378.14    5.39   0
  -5   0   8    9.44    5.44   0
  -4  -3   4   47.19    4.04   0
  -2   2   8   28.64    3.27   0
  -1  -1   3 1530.58    5.26   0
  -1   0   5  166.18    2.80   0
  -1   2   7  143.41    2.85   0
   0   1   4    9.72    1.25   0
  -5  -5   0 1278.54    9.10   0
  -7  -6  -2  177.83    5.54   0
  -7  -5   2   52.16    7.11   0
  -2  -2   4  433.44    4.38   0
  -2   0   7  436.57    4.87   0
   0   0   1  575.50    1.35   0
   0   3   6  152.01    1.78   0
  -6  -2   7  146.40    6.69   0
  -5  -2   7   79.06    5.66   0
  -4  -3   5    4.50    4.19   0
  -4   1   9   10.57    4.27   0
  -3  -1   7  301.81    5.32   0
  -3   0   8  601.72    6.06   0
  -2   1   8  235.46    4.35   0
  -6  -5   2   41.65    4.68   0
  -5  -5   1   84.18    4.24   0
  -5  -1   8   33.15    5.81   0
  -3  -4  -3  102.27    1.95   0
  -3  -3   4  193.87    4.10   0
  -3  -2   6    3.04    3.45   0
  -1  -1   4  291.57    3.38   0
  -1   1   7  123.88    2.89   0
  -4  -4   3   38.40    4.16   0
  -4  -2   7   92.36    4.91   0
  -4  -1   8   57.93    4.70   0
  -3   1   9   34.39    3.86   0
  -1   0   6   42.59    2.90   0
   0   0   2    3.36    1.06   0
  -7  -6   0   21.53    5.65   0
  -7  -5   3   66.19    6.72   0
  -6  -6  -2   51.71    4.17   0
  -6  -4   5  563.81    9.16   0
  -3  -4   1   68.44    3.59   0
  -6  -5   3  113.03    6.16   0
  -4  -5  -2   63.42    2.65   0
  -2  -3   2  530.62    4.13   0
  -2   2   9    8.64    2.69   0
  -1   2   8    4.91    2.50   0
   0   1   5   21.95    1.48   0
   0   2   6  142.08    2.00   0
  -4  -5  -3   89.84    2.72   0
  -3  -1   8   78.90    4.00   0
  -2  -3  -3   52.50    1.00   0
  -2   0   8  391.40    4.75   0
  -1  -1   5   43.20    2.63   0
  -7  -6   1   13.86    5.26   0
  -5  -2   8   15.25    5.03   0
  -3  -2   7   43.62    4.12   0
  -3   0   9    8.86    4.00   0
   0   0   3  106.02    1.74   0
  -5  -3   7   50.11    5.64   0
  -4  -5   1   38.97    3.34   0
  -4  -2   8   11.14    5.03   0
  -4   1  10   14.56    4.21   0
  -3  -4  -4  822.39    3.02   0
  -2  -3   3    4.73    2.85   0
  -1  -2   2 1874.35    5.43   0
  -4  -1   9   19.95    5.62   0
  -3  -4   3  410.64    5.03   0
  -5  -4   6    8.94    5.21   0
  -4  -5   2   96.12    3.88   0
  -4  -4   5   33.00    4.29   0
  -4  -3   7   22.21    4.70   0
  -3   1  10    7.71    4.02   0
  -1  -2   3  939.01    4.78   0
   0   0   4  820.53    3.34   0
  -5  -6  -2  193.36    4.02   0
  -5  -6  -1  868.52    7.19   0
  -5  -5   4   22.78    5.11   0
  -4   0  10  131.28    5.38   0
  -3  -1   9  287.02    6.05   0
  -2  -1   8  282.41    4.72   0
  -2   0   9 1584.48    8.95   0
   0   1   6   76.68    2.01   0
   0   3   7   25.11    1.42   0
  -5  -3   8   12.71    5.08   0
  -3  -4   4   42.97    3.79   0
  -1  -2   4  854.19    4.76   0
   0   2   7  101.11    2.27   0
  -4  -5   3  187.84    4.63   0
  -2  -2   7   21.82    3.40   0
   0   0   5   25.56    1.81   0
  -5  -6   1    5.48    3.94   0
  -5  -4   7    8.17    5.27   0
  -4  -1  10    0.46    4.40   0
  -2  -3   5  142.61    3.63   0
  -4  -5   4   23.16    3.83   0
  -3  -4   5   59.14    4.18   0
  -1  -1   7  191.39    3.74   0
  -1   1   9 1169.76    6.33   0
  -2  -1   9   64.19    3.78   0
   0   1   7   19.88    2.02   0
  -4  -4   7  523.43    7.80   0
  -3  -2   9  163.92    5.61   0
  -3  -1  10  319.54    6.82   0
  -2  -4   1    1.84    2.75   0
  -2  -3   6  286.17    4.41   0
  -2  -2   8   16.08    3.90   0
  -2   0  10   37.20    4.00   0
   0   0   6   22.59    1.94   0
  -5  -6   3   28.32    5.48   0
  -5  -5   6   70.50    5.60   0
  -4  -5   5  160.33    5.19   0
  -3  -5  -1    0.41    2.82   0
  -3  -5   2 1269.66    7.18   0
  -3  -3   8    0.30    4.26   0
  -1  -2   6   83.48    3.33   0
  -1  -1   8  198.87    4.16   0
  -1   0   9  466.92    4.99   0
   0  -1   3 4497.36    7.55   0
   0  -1   4  115.88    2.42   0
   0   2   8   63.67    2.10   0
  -4  -6   0    7.99    2.96   0
  -3  -5   3   13.82    3.40   0
  -2  -4  -1  311.56    2.87   0
  -2  -3   7   73.12    3.96   0
  -2   1  11    1.63    3.88   0
  -1  -3   2   74.63    2.38   0
   0  -1   2   93.60    1.94   0
   0   0   7  108.08    3.53   0
  -6  -7   1   35.58    4.38   0
  -4  -6   1  586.86    6.12   0
  -4  -5   6  400.35    7.04   0
  -4  -4   8   11.40    5.20   0
  -3  -5  -2  244.87    3.04   0
  -2  -1  10   28.54    3.98   0
  -1  -3   1 1045.81    4.15   0
  -1  -3   3  468.66    3.94   0
  -1  -2   7    1.44    2.93   0
  -1   1  10   86.72    3.31   0
   0  -1   5    3.48    2.20   0
   0   1   8   52.20    2.43   0
  -6  -7   2   32.15    5.77   0
  -3  -5   4   40.65    3.94   0
  -3  -2  10   17.63    4.90   0
  -3  -1  11   65.40    4.93   0
  -2  -4   5   40.84    3.47   0
  -2  -2   9   32.65    3.73   0
  -4  -6  -2   73.07    2.41   0
  -4  -6   3    2.30    4.09   0
  -1  -3   5  274.60    4.04   0
  -1  -1   9   38.76    3.31   0
   0  -1   6  469.07    3.80   0
  -3  -5   5  428.63    5.83   0
  -1  -3   0  171.08    2.23   0
   0  -1   1  120.91    1.45   0
   0   2   9   18.03    2.35   0
  -4  -6   4   76.57    5.68   0
  -2  -4   6  342.10    5.37   0
  -1  -2   8    3.01    3.42   0
  -5  -7   1   66.40    4.79   0
  -3  -5   6  207.85    5.54   0
  -2  -4  -2  518.53    2.90   0
  -2  -1  11   43.52    4.77   0
  -1  -3   6   21.00    2.17   0
  -5  -7   2    5.93    4.04   0
  -4  -6   5  238.54    6.43   0
  -3  -3  10    2.24    4.87   0
  -2  -4   7  263.11    5.47   0
  -5  -7   3  318.22    7.51   0
  -3  -5  -3  526.57    3.16   0
  -1  -3   7  508.86    5.40   0
  -1  -2   9    3.09    3.57   0
  -1   0  11    8.00    4.33   0
   0  -2   3  151.96    2.71   0
   0  -2   4    7.19    1.75   0
   0  -2   5 3448.70    8.94   0
   0   0   9   12.59    2.61   0
  -3  -6   2   76.12    4.55   0
  -3  -5   7  178.56    5.75   0
  -3  -4   9   27.39    5.02   0
  -2  -5   2   91.10    3.37   0
  -2  -5   3  148.96    4.07   0
  -2   0  12  123.60    4.82   0
  -4  -6   6   30.52    5.13   0
  -3  -6   1 1785.89    9.02   0
  -3  -6   3   40.79    3.91   0
  -2  -5   4   71.37    3.94   0
  -2  -4   8   33.75    4.74   0
  -1  -2  -2   62.34    0.60   0
   0  -2   2 2206.81    5.65   0
   0   1  10   14.47    2.70   0
  -3  -6   0  778.28    6.55   0
  -2  -5   5  199.92    4.79   0
  -1  -4   2  950.52    5.29   0
  -1  -4   4  108.06    3.38   0
   0  -2   7  100.36    3.15   0
  -3  -5   8   25.65    5.09   0
  -2  -5   0   37.48    2.55   0
  -1  -4   5    4.60    3.06   0
  -1  -2  10    6.84    3.74   0
  -1  -1  11   17.79    4.42   0
   0  -1   9  482.57    5.20   0
   0   0  10  444.88    5.01   0
  -4  -7   1  146.53    4.34   0
  -4  -7   2  130.35    5.13   0
  -4  -7   3    7.35    5.92   0
  -3  -6   5    1.09    4.48   0
  -2  -5   6    3.04    3.70   0
  -1  -4   1   57.06    2.72   0
  -1  -4   6  233.89    4.70   0
   0  -2   8  424.09    5.11   0
   1   1   6    7.36    1.52   0
  -2  -4   9   11.65    4.67   0
  -1   0  12   -2.41    3.91   0
   1   1   5  142.54    1.61   0
   1   1   7  130.53    2.17   0
  -4  -7   4  340.95    7.84   0
  -3  -6   6    3.62    4.38   0
  -2  -5   7   -2.47    4.61   0
  -1  -4   7  523.11    6.47   0
   0  -2   1  512.86    2.92   0
   0  -1  10  242.03    4.64   0
   0   1  11  120.58    3.58   0
   1   0   5    2.82    1.60   0
   1   0   6  721.54    3.81   0
   1   0   7  385.26    3.68   0
  -2  -5  -1  322.90    3.62   0
  -1  -2  11  166.14    6.02   0
   0  -3   3  236.63    3.27   0
   0  -3   6  723.75    5.79   0
   0  -2   9  108.17    4.15   0
   0   0  11  315.84    4.95   0
   1   1   8  192.75    2.77   0
   1   2   6  105.58    1.47   0
   1   2   7  114.19    1.76   0
  -1  -4   8   54.56    4.51   0
  -1  -3  10    5.68    4.73   0
   0  -3   7  260.61    4.51   0
   1   0   4 1072.13    3.53   0
   1   1   4  374.59    1.88   0
   1   2   8   20.83    1.96   0
   1  -1   5 1299.69    5.23   0
   1  -1   6  186.40    2.99   0
  -3  -6  -2   39.28    1.93   0
  -2  -6   2  401.87    5.97   0
  -2  -6   3  252.19    5.09   0
   0  -3   2    1.53    1.47   0
   0  -3   8  556.27    6.35   0
   0  -2  10   30.38    3.83   0
   0  -1   0   11.20    0.72   0
   0  -1  11   10.90    4.06   0
   1   0   9  264.57    3.91   0
   1   2   5   37.86    0.98   0
  -3  -7   3  185.48    5.91   0
  -2  -6   5   -0.60    3.98   0
  -1  -5   5   15.18    2.68   0
  -1  -5   6    7.64    3.87   0
  -1  -2  12   26.33    4.57   0
   0   0  12   20.82    4.62   0
   1  -1   4   70.70    2.32   0
   1  -1   8  415.60    4.75   0
   1   2   9  160.26    2.62   0
  -3  -7   1   35.73    4.45   0
  -2  -6   1  114.50    3.74   0
  -1  -5   2  130.74    3.54   0
   0  -3   9   19.75    3.85   0
   1   1  10  206.06    3.52   0
  -3  -7   5   24.44    5.02   0
  -1  -4  10   69.21    5.92   0
   0  -4   4  103.48    3.40   0
   0  -4   5   15.63    3.03   0
   0  -4   6  343.40    5.15   0
   0  -2  11   47.43    5.07   0
   1  -1   9   31.25    3.15   0
   1   0   3 2090.50    4.18   0
  -2  -4  -3   14.60    0.98   0
   0  -4   7  281.71    5.50   0
   0  -3   1   99.38    2.18   0
   0  -1  12   17.46    4.88   0
   1  -2   5  172.81    3.37   0
   1  -2   7   20.14    2.81   0
   1   2  10    3.86    2.27   0
  -3  -7   0  204.06    3.93   0
  -2  -5  -2    0.63    1.69   0
   0  -3  10   29.23    4.89   0
   1  -2   4  831.95    4.91   0
   1  -2   8   13.97    3.43   0
   1  -1   3  638.13    3.50   0
   1  -1  10   -0.74    3.12   0
   0  -4   8    0.47    4.02   0
   1  -2   9   19.96    3.73   0
   1   0  11   20.88    3.16   0
   0  -4   2  156.28    3.50   0
   0  -4   9    7.51    4.89   0
   0  -3  11   23.87    4.78   0
   1  -3   6    5.21    2.88   0
   1  -3   7   90.92    3.73   0
   1  -2   3    4.80    2.45   0
   1  -2  10    0.67    3.50   0
   1  -1  11    1.70    3.94   0
  -2  -7   4   16.97    5.02   0
  -1  -6   3  244.83    5.45   0
  -1  -6   5    9.61    4.16   0
  -1  -6   6   13.89    4.99   0
   1  -3   8  144.76    4.78   0
   1   0  12   15.00    3.53   0
  -2  -6  -1   38.76    2.28   0
  -1  -6   7    1.29    4.57   0
   0  -5   6   49.86    4.23   0
   0  -4  10    5.43    5.22   0
   1  -3   9    4.87    3.91   0
   1   1   3   -0.68    0.75   0
  -1  -6   2  373.56    6.28   0
  -1  -3  -2   10.49    1.31   0
   0  -5   7   10.61    5.05   0
   0  -4   1  113.59    3.85   0
   1  -2  11    2.81    4.04   0
   1  -1  12   22.05    4.83   0
   0  -3   0  308.12    2.68   0
   1  -3  10   92.29    5.59   0
   1  -1   2 2826.02    5.91   0
   2   0   7  288.70    3.76   0
   1  -4   6    4.32    3.80   0
   1  -3   3 1259.70    6.49   0
   2  -1   8  242.61    4.59   0
   2  -1   9  200.23    4.36   0
   2   1   8   24.47    2.20   0
  -1  -6   1  270.21    4.94   0
   0  -5   9    5.42    5.04   0
   1  -4   5    3.16    3.42   0
   1  -4   7   32.51    4.26   0
   1  -4   8   42.34    4.85   0
   1  -2   2  297.27    2.72   0
   1  -2  12   25.74    4.86   0
   1  -1  13   -2.37    5.08   0
   2  -1   6   99.03    3.19   0
   2   0   6  341.66    3.41   0
   2   0  10  406.16    5.66   0
   2   1   7   21.62    2.09   0
   2   1  10   36.46    3.30   0
   0  -5   2   88.29    3.67   0
   1  -4   9  250.74    7.55   0
   1  -3  11   49.30    5.22   0
   1   0   2  417.69    2.07   0
   2  -2   7   19.60    3.03   0
   2  -2   8   92.94    4.19   0
   2  -1  10   27.38    3.54   0
   1  -4   4  117.91    3.98   0
   2  -2   6   34.68    3.26   0
   2  -2   9    8.78    3.90   0
   2  -1   5  167.42    3.20   0
   2   0  11   86.28    4.37   0
  -1  -7   4    0.97    5.41   0
   0  -6   5    4.43    4.67   0
   0  -6   6    9.20    5.02   0
   1  -4  10   -3.75    5.42   0
   1  -3   2   15.36    2.57   0
   1   2   4   72.51    0.73   0
   2  -2  10   55.74    4.63   0
   2  -1  11   28.74    4.17   0
   2   0   5  374.41    3.21   0
   2   1   6   53.93    2.02   0
  -2  -6  -2   32.64    1.96   0
   0  -6   7   16.19    5.15   0
   0  -4   0  188.45    3.53   0
   1  -4   3   48.04    3.62   0
   2   0  12    6.31    3.95   0
   2   2   9    1.20    2.17   0
   1  -5   6    8.67    4.13   0
   1  -5   7   60.14    5.99   0
   2  -3   7  300.04    5.56   0
   2  -3   8   31.09    4.45   0
   2  -1  12   44.49    5.57   0
   2   2   8   38.14    2.22   0
   2   2  10   24.27    2.75   0
  -1  -7   2   36.96    4.55   0
  -1  -4  -2  206.85    2.32   0
   0  -6   3  557.24    7.81   0
   1  -5   5    2.98    4.15   0
   1  -5   8  189.71    7.62   0
   2  -3   9  423.04    7.01   0
   2  -1   4  388.88    3.89   0
   1  -5   4    3.29    4.05   0
   1  -5   9    0.73    5.61   0
   2  -3  10  103.96    6.41   0
   2  -2   4  568.64    5.23   0
   2  -2  12   15.59    5.10   0
   0  -6   2   55.74    4.42   0
   1  -2   1 1483.59    5.60   0
   2  -1  13    5.12    4.92   0
   2   0   4  192.11    2.62   0
   2   1   5  276.37    2.45   0
   2   2   7   33.13    1.73   0
  -1  -7   1   91.28    5.38   0
   2  -4   8  298.05    8.04   0
   1  -5   3  329.18    6.21   0
   1  -3   1    4.83    2.54   0
   1  -1   1 2257.31    5.35   0
   2  -4   6    1.61    4.29   0
   2  -4   9   35.58    5.98   0
   2  -3   4  104.89    4.08   0
   3  -1   9    5.46    3.65   0
   3   0   9  383.89    6.51   0
  -1  -6  -1   60.11    3.35   0
   0  -5   0   49.10    3.24   0
   0  -3  -1   98.53    2.09   0
   2  -4   5  229.86    5.85   0
   2  -2   3  187.00    3.85   0
   3  -1   8   71.03    4.35   0
   3  -1  10    0.15    3.75   0
   3   0  10    8.69    3.62   0
   0  -6   1   22.60    3.97   0
   0  -2  -1 1055.22    3.32   0
   1  -6   5   10.97    5.25   0
   1  -6   6    5.83    5.10   0
   2  -1   3 1553.46    6.65   0
   3  -2   8    9.46    4.25   0
   3  -1   7  158.51    4.65   0
   3  -1  11    7.63    4.45   0
   3   0  11   39.55    4.05   0
  -1  -5  -2  592.73    4.26   0
   1  -5   2  137.10    5.06   0
   1  -4   1  132.53    4.77   0
   2  -4   4   35.13    4.47   0
   3  -2  10   -4.14    4.69   0
   3   0  12   -3.22    4.83   0
   3   1  10  360.65    5.87   0
   0  -7   3   30.63    6.07   0
   0  -4  -1    8.24    2.19   0
   1  -6   4   33.78    5.40   0
   2  -5   7   82.25    6.47   0
   2  -5   8   13.57    6.45   0
   2   2   6   17.88    1.64   0
   3  -1  12   22.88    5.94   0
   3   1   8   39.21    2.88   0
   2  -5   6   16.05    5.40   0
   3  -3   7   -0.66    4.67   0
   3  -3   8  196.09    6.77   0
   3  -3  10   28.30    6.20   0
   3  -2   6    3.02    2.50   0
   3  -2  12   -5.81    5.52   0
   3   0   6  129.23    3.61   0
   2   0   3 2051.20    5.83   0
   3   0  13   -1.51    4.34   0
   2  -4   3   28.93    4.39   0
   2   1   4 2026.27    4.98   0
   3  -3   6   25.17    4.29   0
   3  -2   5    5.73    3.69   0
   3   1   7  486.23    4.95   0
   0  -6   0  157.48    4.51   0
   1  -5   1   99.17    4.50   0
   2  -5   4  383.65    7.54   0
   2  -3   2  390.53    5.17   0
   2  -2   2   71.14    3.60   0
   3  -4   8    5.41    6.14   0
   0  -5  -1    6.41    3.22   0
   1  -6   2  198.19    6.83   0
   3  -4   7   -1.48    5.26   0
   3  -3   5  569.76    7.59   0
   3   2  10   18.20    3.05   0
   0  -7   1    1.52    4.82   0
   1  -7   5   11.37    5.68   0
   2  -1   2 2999.15    8.27   0
   3  -4   6    6.82    4.82   0
   3   0   5  194.42    3.55   0
   3   2   9   11.56    2.56   0
   1  -7   4    1.44    6.31   0
   1  -4   0  188.08    4.33   0
   2  -5   3  179.15    5.96   0
   2  -4   2  164.10    5.40   0
   3  -1   4   15.73    3.22   0
   3   1   6   24.82    2.62   0
   4  -1  10  121.82    5.55   0
  -1  -6  -2    0.16    1.79   0
   2  -6   5    0.07    6.47   0
   3  -4   5   11.54    4.53   0
   3  -3   4    0.45    3.48   0
   3   2   8  183.95    3.51   0
   4  -2   8    3.71    4.74   0
   4  -1   8   96.60    4.93   0
   4   0   9  139.23    4.74   0
   4   0  11  145.74    5.77   0
   1   0   1  356.82    2.20   0
   3  -5   7   -0.30    5.98   0
   4  -2  11   -2.87    5.97   0
   4  -1  12    7.03    5.40   0
   4   0  12   10.35    4.96   0
   1  -6   1  143.31    5.38   0
   4  -3   8    3.98    5.91   0
   4  -3   9   78.43    6.17   0
   4  -2   7  422.90    7.27   0
   4   1  10   32.70    4.69   0
   2  -5   2   30.38    4.65   0
   2  -3   1   53.81    3.68   0
   3  -4   4  379.77    6.39   0
   3   0   4   23.44    2.56   0
   4  -3   7   33.90    5.19   0
   4   1   9   80.80    4.39   0
   4   1  11  268.92    5.77   0
   1  -7   2   -0.47    5.92   0
   2  -6   3  252.33    8.99   0
   2  -2   1  169.94    3.93   0
   2   2   5  117.67    1.52   0
   4  -1   6    2.19    3.58   0
   3  -1   3   85.80    3.38   0
   3   1   5  355.64    3.20   0
   3   2   7  364.42    3.42   0
   4  -3   6   36.50    5.03   0
   1  -1   0   50.81    2.14   0
   1   1   2  337.98    1.35   0
   2   0   2 9999.99   11.50   0
   3  -4   3   87.86    5.27   0
   4  -2   5   20.00    3.59   0
   4  -1   5  211.04    4.47   0
   1  -6   0   71.42    5.02   0
   1  -4  -1  636.92    5.30   0
   2  -7   4    9.20    5.03   0
   2  -6   2  190.64    6.69   0
   2  -5   1    1.06    4.31   0
   2   1   3  268.67    2.37   0
   4  -3   5   52.29    4.98   0
   0  -5  -2    1.78    2.47   0
   0  -3  -2  647.01    2.89   0
   1  -7   1   27.09    4.70   0
   1  -3  -1  137.10    2.45   0
   2  -1   1 4235.52   10.47   0
   3  -3   2 1079.99    8.58   0
   3  -2   2  173.64    4.40   0
   5  -2  10   -2.02    5.08   0
   5  -1  10   30.14    5.89   0
   5  -1  11   22.54    5.76   0
   3  -4   2    8.14    4.61   0
   4  -4   5   23.66    4.85   0
   4  -2   4    5.02    3.52   0
   5   0   9   -0.08    4.66   0
   5   0  11   18.61    5.01   0
   5   0  12   94.16    6.15   0
  -1  -5  -3   23.03    1.42   0
   2  -3   0   72.50    3.75   0
   3   0   3  285.32    3.65   0
   4  -3   4    7.63    4.42   0
   5  -3   9    5.21    5.42   0
  -1  -4  -3  452.37    1.92   0
   3   2   6   88.31    2.02   0
   4   1   6  470.02    4.73   0
   5  -1   7  194.35    5.98   0
   2  -6   1    3.54    4.17   0
   3  -1   2   30.58    3.47   0
   3   1   4  772.93    4.02   0
   4  -4   4    6.42    4.53   0
   5  -3   7   42.13    6.44   0
   5   1  10   99.93    4.77   0
   5   1  11   92.46    4.59   0
   0  -1  -1 6184.76    4.03   0
   2  -2   0 3095.54    9.43   0
   3  -6   3   11.68    6.28   0
   4   2   8   74.05    2.79   0
   5  -2   6    9.65    4.64   0
   1  -6  -1  169.65    4.60   0
   4  -3   3    4.04    4.61   0
   4  -2   3  205.44    5.07   0
   5  -3   6   -3.30    5.30   0
   5  -1   6  154.89    5.27   0
   4  -4   3   81.17    5.41   0
   4   0   4  246.47    4.13   0
   5  -4   7    7.45    6.19   0
   3  -2   1   14.08    3.92   0
   5  -2   5   77.85    4.99   0
   5   0   6    1.37    3.95   0
   3  -6   2  228.35    8.14   0
   3  -5   1   19.80    4.74   0
   4   1   5  439.71    4.67   0
   4   2   7  206.00    3.37   0
   5  -3   5    5.76    3.48   0
   5  -1   5    0.52    3.89   0
   6  -1  10   25.00    5.71   0
   4  -5   3   -1.84    6.29   0
   5   1   7  463.79    5.82   0
   6  -1   9    0.09    4.92   0
   6   0  10   27.83    5.97   0
   6   0  11   42.68    5.76   0
   2   0   1 7132.08    9.84   0
   3   0   2  601.98    4.76   0
   4  -3   2   55.72    5.29   0
   4  -2   2  579.76    6.92   0
   5   2  10    1.97    3.10   0
   6  -2   8    1.21    5.80   0
   6   0   9    7.08    4.58   0
   1  -5  -2   90.92    3.71   0
   1  -4  -2  786.41    4.65   0
   2  -3  -1 1378.12    7.54   0
   3  -1   1   99.98    4.02   0
   3   2   5  162.08    2.21   0
   5  -2   4  312.38    6.67   0
   5   0   5  100.01    4.53   0
   5   2   9   57.51    4.24   0
   2  -5  -1    5.92    3.18   0
   2  -1   0   25.61    2.02   0
   3  -4   0  681.51    7.56   0
   3   1   3  274.78    3.43   0
   4   0   3  177.45    4.12   0
   5  -4   4    1.57    5.95   0
   5  -1   4   13.80    3.72   0
   6   0   8  166.35    5.83   0
   6   1  11   14.03    4.83   0
   2   2   4  115.00    1.42   0
   4  -6   3    4.33    6.32   0
   4  -5   2   61.60    7.32   0
   4   2   6  718.06    5.00   0
   5   1   6  556.81    6.32   0
   6   1  10    8.75    4.53   0
   1  -3  -2  827.87    3.95   0
   3  -5   0  219.22    5.79   0
   4   1   4   28.13    2.68   0
   6  -2   6  161.93    8.08   0
   6  -1   6   15.03    4.84   0
   6   0   7   34.13    4.34   0
   6   1   9   23.97    4.41   0
   0  -2  -2   25.30    1.10   0
   2  -6  -1    0.94    4.18   0
   3  -2   0   57.61    3.54   0
   4  -3   1  632.83    8.66   0
   5  -3   3   34.13    4.16   0
   5  -2   3   74.61    5.03   0
   2  -2  -1   35.40    2.41   0
   2   1   2 2023.86    4.76   0
   4  -4   1  116.99    6.21   0
   6  -2   5   12.54    5.34   0
   6   1   8   47.32    4.37   0
   4  -6   2    5.39    6.70   0
   4  -2   1   64.11    4.69   0
   5  -1   3   16.46    3.97   0
   6   0   6   65.06    4.95   0
   3  -6   0    3.56    4.95   0
   4  -5   1    8.76    6.08   0
   6  -1   5   29.72    3.73   0
   7  -1   9    9.50    6.06   0
   6  -1   7  171.51    4.88   0
   8  -3   6    5.59    6.48   0
   9   0  -4    0.37    4.35   0
   9   0   4   53.70    6.67   0
   9   1  -1   28.66    5.43   0
   9   1   1   14.34    5.25   0
  10  -2  -1  105.25    5.68   0
  10  -2   0   31.47    5.31   0
  10  -2   1   51.06    6.19   0
  10  -1   0   56.44    5.95   0
   5   1   5   88.08    3.18   0
   6  -3   7    5.51    4.82   0
   6   2   3  573.40    5.11   0
   7   0   6    8.69    4.34   0
   8  -5   4   -0.42    5.54   0
   8  -4   5   14.27    6.24   0
   8  -2   6    0.11    6.44   0
   8   1   4  408.05    6.75   0
   9  -4   3   11.74    6.60   0
   9  -3   4   -4.11    6.18   0
   5  -2   7   37.13    3.47   0
   5   0   6    4.88    2.74   0
   6   0   6   68.41    3.64   0
   6   1   5   28.28    3.41   0
   7  -4   6   10.99    5.24   0
   7   2   2   21.97    3.49   0
   8   0   5   56.62    5.72   0
   9  -2   4  167.07    6.88   0
   9   0  -3  122.09    5.96   0
   6   2   2   61.59    3.27   0
   7   2  -1  517.44    5.59   0
   7   2   0   22.19    4.64   0
   7   2   1   64.78    3.74   0
   8   1   3  235.06    6.52   0
   5   2   2   96.72    2.91   0
   7  -3   6   10.88    5.83   0
   7   1   4   42.50    4.41   0
   8  -3   5    0.04    5.79   0
   9  -4   2   42.53    5.68   0
   9  -3   3  141.73    6.77   0
   9  -1  -4   90.87    5.41   0
   9   0  -2    1.37    5.86   0
   9   0   1    0.05    6.03   0
   4  -1   6    0.31    2.87   0
   6   2   1   59.80    3.02   0
   7   0   5   -0.79    4.53   0
   8  -5   3   10.68    5.59   0
   8  -2   5   10.41    5.63   0
   9  -2   3   32.45    6.64   0
   9   0  -1  101.01    6.53   0
   5   1   4   83.62    2.80   0
   6  -1   6    9.78    3.66   0
   6   1   4   31.89    3.32   0
   6   2  -2   24.52    2.53   0
   6   2   0  481.92    4.41   0
   7   1   3   26.59    4.19   0
   8  -4   4    8.82    6.42   0
   8   1  -1   13.23    5.20   0
   8   1   0   49.46    5.83   0
   8   1   1   65.22    5.77   0
   9  -4   1   44.26    5.66   0
   9  -2  -4   15.10    5.07   0
   9  -1  -3   -4.37    5.41   0
   9  -1   2    0.11    5.93   0
   6   0   5  348.16    4.86   0
   6   2  -1  112.61    3.05   0
   7  -4   5   63.01    6.10   0
   8   0   3  415.52    7.06   0
   9  -4   0    8.23    5.30   0
   9  -2   2   22.18    6.57   0
   9  -1  -2   72.49    6.41   0
   9  -1   1   99.02    6.81   0
   5  -4   6  118.73    5.53   0
   5   0   5  113.38    3.24   0
   7  -6   3   20.44    4.86   0
   7  -5   4   42.77    7.16   0
   7  -1   5   -1.19    4.85   0
   7   1  -4    3.67    4.72   0
   8  -2   4    5.42    5.94   0
   9  -4  -2    9.76    4.63   0
   9  -4  -1   12.37    5.26   0
   9  -3  -3    1.22    6.15   0
   9  -2  -3   25.95    6.20   0
   9  -2   1    1.51    6.26   0
   9  -1  -1    1.06    6.60   0
   9  -1   0   12.90    6.01   0
   4  -2   6    1.78    2.58   0
   6  -6   4   -1.69    4.48   0
   6   1   3  107.53    3.47   0
   7   1   2  100.88    4.38   0
   8  -4   3   30.74    6.01   0
   8   0   2  104.02    6.78   0
   9  -3  -2   -4.50    5.23   0
   9  -3  -1   36.81    5.94   0
   9  -3   0   -0.73    5.13   0
   9  -2  -2   67.25    6.53   0
   9  -2  -1   96.02    6.95   0
   9  -2   0   90.70    6.53   0
   5  -3   6    0.24    3.99   0
   5   1   3  549.70    4.44   0
   7   1   1   54.51    3.83   0
   8   0  -3   48.77    5.53   0
   8   0   1    8.14    5.40   0
   6  -1   5   29.34    3.55   0
   6   0   4    8.36    3.40   0
   7  -1   4   13.53    4.91   0
   7   1  -2  472.28    6.07   0
   7   1   0    5.18    3.79   0
   8  -3   3    8.78    6.59   0
   8  -2  -6   10.43    5.25   0
   8  -2   3   23.46    6.67   0
   8  -1  -5   33.91    5.55   0
   6   1   2  393.69    4.54   0
   7  -6   2   11.22    5.04   0
   7  -4   4    4.31    6.17   0
   8  -4   2    9.86    6.71   0
   4  -1   5  247.44    3.20   0
   5   0   4   16.16    2.84   0
   6  -7   2    8.84    4.45   0
   6  -3   5  135.39    5.49   0
   6  -2   5    6.56    4.04   0
   7  -5   3    2.45    6.41   0
   7  -2   4    2.55    5.21   0
   8  -5   0   -0.52    5.87   0
   8  -3  -6    3.52    4.78   0
   8  -1  -4    5.19    5.79   0
   5   1   2  417.48    3.72   0
   6  -6   3    2.13    5.96   0
   6  -5   4   27.17    4.91   0
   6   1  -4    9.98    3.37   0
   7   0   2   76.53    4.45   0
   8  -5  -1    5.29    5.51   0
   8  -4   1   15.57    5.93   0
   8  -2  -5   17.66    5.84   0
   6  -1   4  186.01    4.39   0
   6   0   3    9.46    3.19   0
   7  -6   1   20.82    5.64   0
   7  -4   3    1.14    6.64   0
   8  -5  -3  165.11    5.79   0
   8  -4  -5   36.83    5.28   0
   8  -1  -2  163.25    6.55   0
   6   1  -3    0.36    2.68   0
   6   1   0  157.63    3.48   0
   7  -5   2   36.88    6.78   0
   7  -2   3    1.05    5.28   0
   7   0  -4    3.09    4.25   0
   8  -4   0    0.20    6.09   0
   8  -3  -5    0.86    5.24   0
   8  -2  -4   -3.57    6.36   0
   8  -2   0    7.07    6.04   0
   4  -2   5   19.07    2.30   0
   5   1   1  674.48    4.41   0
   6  -7   1   99.31    5.24   0
   6   1  -2   91.34    3.33   0
   6   1  -1  155.79    3.47   0
   7  -6   0   24.66    5.23   0
   7   0  -3   95.62    5.14   0
   7   0   0   -2.14    3.83   0
   8  -4  -4   13.54    5.21   0
   8  -4  -3   27.52    5.58   0
   8  -4  -1   57.66    6.04   0
   8  -2  -2  200.63    6.37   0
   4  -4   5   28.90    2.93   0
   5   0   3   43.48    2.51   0
   6  -3   4   45.92    5.42   0
   6   0   2   65.97    3.49   0
   7   0  -2   -2.42    4.69   0
   7   0  -1   41.00    4.28   0
   8  -3  -3   61.20    6.66   0
   8  -3  -2   21.81    6.24   0
   6  -6   2   55.20    5.76   0
   6  -5   3    2.22    5.60   0
   6  -1   3   60.50    3.72   0
   7  -6  -1    8.93    5.45   0
   7  -5   1   31.07    6.59   0
   7  -1   1    6.69    4.68   0
   4  -1   4   45.99    2.41   0
   5  -7   2   14.51    4.72   0
   5   1  -4  312.90    3.56   0
   7  -6  -2    7.33    6.50   0
   5  -8   0   16.23    4.28   0
   5  -4   4    6.75    4.37   0
   5  -2   4  327.26    4.38   0
   5   1  -3    8.66    2.60   0
   5   1  -1   12.92    2.19   0
   6   0   1  171.70    3.98   0
   7  -6  -5   70.83    5.25   0
   7  -6  -4   19.83    5.32   0
   7  -5   0    4.91    6.06   0
   7  -4   1    4.68    5.48   0
   7  -2   1    5.81    5.73   0
   5   0   2  406.93    3.81   0
   5   1  -2   98.10    2.56   0
   6  -6   1   28.83    6.25   0
   6  -3   3   11.64    4.51   0
   6  -1   2    4.85    3.53   0
   7  -4  -7   33.21    5.27   0
   7  -1  -3   10.67    5.63   0
   4  -5   4   54.97    4.04   0
   5  -1   3   15.97    2.79   0
   6  -7  -1   -2.48    5.19   0
   6  -5   2    5.92    5.51   0
   6   0   0   10.80    2.22   0
   7  -5  -6    1.76    5.00   0
   7  -5  -1    1.83    6.02   0
   7  -4   0   39.82    6.39   0
   7  -3  -6   41.86    7.33   0
   7  -2  -5   65.45    5.65   0
   7  -2   0    5.18    4.97   0
   5  -8  -1   14.88    4.76   0
   5  -7   1    5.68    5.33   0
   5  -5   3   19.77    5.52   0
   6   0  -3   91.21    3.74   0
   6   0  -2  201.59    4.05   0
   6   0  -1   15.47    2.92   0
   7  -5  -4  130.51    5.88   0
   7  -5  -3   77.03    6.09   0
   7  -5  -2  197.30    6.55   0
   7  -4  -6   15.50    6.05   0
   4  -4   4    6.16    3.69   0
   5  -6   2    4.53    4.93   0
   5   0   1   19.06    2.42   0
   6  -6   0   16.28    5.96   0
   6  -4   2    7.34    5.18   0
   6  -2  -8   -2.50    3.73   0
   6  -1   1  108.13    3.91   0
   7  -4  -5   35.52    5.86   0
   7  -2  -4    9.40    5.75   0
   4  -7   2    8.66    4.50   0
   4  -3   4    6.35    2.61   0
   5  -2   3   79.63    3.17   0
   6  -7  -4    7.47    6.20   0
   6  -7  -3   81.99    5.34   0
   6  -5  -9   14.87    4.59   0
   6  -5   1   28.61    5.39   0
   6  -4  -9  111.81    5.12   0
   6  -3   2    8.46    4.54   0
   6  -1  -6   12.91    3.93   0
   7  -4  -4   10.19    5.59   0
   7  -4  -3   14.03    5.97   0
   7  -4  -2    6.51    5.99   0
   7  -3  -4   -0.10    5.35   0
   7  -3  -3   28.03    5.98   0
   4  -9  -2   23.19    3.96   0
   5  -4   3   50.25    4.65   0
   5  -3   3   38.14    3.49   0
   5  -1   2   25.45    2.64   0
   6  -7  -5   38.78    4.74   0
   6  -6  -8    8.35    4.38   0
   6  -6  -1   62.44    6.39   0
   6  -1   0  180.37    4.25   0
   3  -3   4    0.41    2.43   0
   4  -8   0   23.70    5.69   0
   5  -7   0   79.70    6.51   0
   5   0   0  361.92    3.73   0
   6  -3  -8  197.28    5.78   0
   3  -4   4  324.24    3.53   0
   4  -5   3    1.16    4.60   0
   5   0  -5  326.85    4.19   0
   6  -6  -7   11.41    4.53   0
   6  -6  -2  327.08    7.13   0
   6  -5  -8  113.84    5.51   0
   6  -4  -8   47.09    6.25   0
   4  -9  -3    4.82    4.33   0
   5  -8  -4    4.21    5.45   0
   5  -2   2   10.20    3.03   0
   5   0  -1   13.88    2.37   0
   6  -6  -6    4.64    5.44   0
   6  -6  -3   33.65    5.79   0
   6  -2   0   85.09    4.19   0
   3  -9  -1    4.87    4.61   0
   4  -6   2   14.12    4.32   0
   5  -7  -1  238.85    7.26   0
   5  -6 -10   39.97    5.49   0
   5  -4   2   15.51    4.00   0
   5  -3   2  616.53    5.49   0
   5  -1   1  179.72    2.62   0
   5   0  -4   41.21    2.50   0
   5   0  -3  252.76    3.34   0
   5   0  -2    7.95    2.03   0
   6  -6  -4   97.42    6.18   0
   6  -5  -7   17.47    6.37   0
   6  -3  -7   12.13    4.93   0
   6  -3   0  261.69    5.65   0
   6  -2  -1   22.12    3.97   0
   4  -9  -4   -3.37    4.70   0
   4  -8  -1  338.01    6.58   0
   4  -4   3   88.96    3.43   0
   4  -3   3    0.27    2.44   0
   5  -6   0   70.44    7.10   0
   5  -1  -7  200.20    4.71   0
   6  -5  -6   15.80    6.27   0
   6  -5  -2   62.49    5.82   0
   6  -2  -5  233.48    5.61   0
   5  -7  -2    5.22    5.95   0
   5  -5   1  209.78    5.85   0
   5  -4 -10   81.13    5.17   0
   5  -1   0  100.85    3.04   0
   6  -5  -5   40.10    6.13   0
   6  -5  -4  216.33    6.75   0
   6  -5  -3  136.26    6.53   0
   6  -4  -6   22.67    5.99   0
   6  -3  -1   11.41    4.67   0
   6  -2  -4   66.57    4.87   0
   5  -7  -3   10.72    5.83   0
   5  -4   1  227.40    4.74   0
   5  -2   1    3.56    2.93   0
   6  -4  -5    5.17    5.31   0
   6  -3  -3   74.01    5.30   0
   3  -9  -2   45.02    4.60   0
   3  -8   0   28.60    4.49   0
   4  -8  -2   51.62    6.35   0
   4  -7   0  130.59    5.48   0
   4  -5   2   71.61    3.97   0
   5  -7  -7   17.69    5.35   0
   5  -7  -4   12.75    5.29   0
   5  -6  -9    4.35    5.10   0
   5  -3  -9   60.05    4.61   0
   5  -3   1  465.13    5.30   0
   5  -2  -8   57.78    4.24   0
   5  -1  -6   77.63    3.52   0
   5  -1  -1   34.32    2.83   0
   3  -3   3  125.33    2.57   0
   4  -6   1    4.10    4.67   0
   5  -7  -6    4.10    4.98   0
   5  -7  -5   85.00    5.66   0
   5  -5   0   53.80    5.02   0
   4  -8  -9   70.22    5.05   0
   4  -8  -3    0.35    5.73   0
   4  -4   2   43.46    3.34   0
   4  -3   2   59.60    2.80   0
   4   0  -5  440.55    3.76   0
   5  -6  -8   13.44    5.58   0
   5  -4   0  114.91    4.54   0
   5  -2   0    6.96    1.94   0
   5  -1  -4  360.93    4.82   0
   5  -1  -3   70.59    2.95   0
   5  -1  -2   74.43    2.89   0
   3  -9  -3   -0.95    5.38   0
   4   0  -4   27.85    2.24   0
   5  -6  -7  109.28    6.05   0
   5  -6  -3   46.31    5.88   0
   5  -5  -1   16.46    5.21   0
   5  -3   0   60.07    3.71   0
   5  -2  -7   86.10    4.38   0
   2 -10  -4   11.97    4.13   0
   3  -8  -1   27.23    6.19   0
   4  -8  -8   17.23    5.37   0
   4  -8  -7    2.18    4.95   0
   4  -8  -4   -2.56    5.30   0
   4  -7 -10   47.59    5.57   0
   4  -6 -11    1.96    5.08   0
   4  -5   1   14.34    3.88   0
   5  -6  -6    6.84    5.74   0
   5  -5  -8   -2.31    5.36   0
   5  -4  -8  147.33    5.87   0
   5  -2  -1  149.24    3.64   0
   3  -9  -4    8.04    5.47   0
   4  -8  -6   86.47    5.60   0
   4  -5 -11    9.12    4.98   0
   4  -1   0  247.37    2.99   0
   5  -4  -1   11.54    4.11   0
   5  -2  -6   29.64    3.70   0
   5  -2  -2  131.27    3.80   0
   2 -10  -5   -3.72    3.89   0
   3  -5   2   28.18    2.85   0
   4  -7  -9   33.19    6.57   0
   4  -7  -2    9.54    5.88   0
   4  -4   1  164.74    3.60   0
   4  -3 -10  110.96    5.70   0
   4  -3   1  590.34    4.63   0
   5  -5  -6  394.55    6.96   0
   5  -4  -2   17.36    4.42   0
   5  -2  -5  126.42    4.18   0
   5  -2  -4    8.93    3.01   0
   5  -2  -3    1.77    3.09   0
   2 -10  -6   21.79    5.51   0
   2  -9  -2    9.05    4.55   0
   2  -6   2  211.01    4.26   0
   3  -9  -8   12.75    4.65   0
   3  -9  -7   -4.02    4.65   0
   3  -9  -6  132.11    5.39   0
   4  -7  -3   -3.87    5.10   0
   4  -1  -7    8.53    2.34   0
   5  -5  -5   74.69    6.05   0
   5  -3  -6    1.83    4.29   0
   5  -3  -2  440.31    5.30   0
   2 -10  -7    6.56    4.97   0
   2  -7   1   66.01    3.85   0
   3  -7 -12    1.99    4.10   0
   3  -4   2    6.68    2.07   0
   3  -3   2 1040.94    4.97   0
   4  -7  -8   61.66    5.55   0
   4  -6  -1   10.44    4.63   0
   4  -5   0    4.23    3.83   0
   4  -4 -10    2.94    5.74   0
   4  -1  -1  386.03    3.39   0
   5  -4  -3  131.82    5.14   0
   5  -3  -5   44.02    4.67   0
   5  -3  -3   12.63    3.76   0
   4  -7  -7  108.76    6.10   0
   4  -7  -5   11.04    5.90   0
   4  -7  -4    5.47    5.58   0
   4  -5 -10   17.71    5.51   0
   4  -2   0   49.37    2.32   0
   4  -1  -6  183.11    3.40   0
   2  -9  -3   11.34    5.65   0
   3  -8 -10   32.98    4.73   0
   3  -8  -3   15.50    5.08   0
   3  -6 -12   40.58    4.85   0
   4  -7  -6   -1.45    5.73   0
   4  -6  -9   30.72    5.73   0
   4  -4   0  451.17    4.90   0
   4  -3   0  686.88    5.03   0
   4  -2  -8   55.86    3.71   0
   4  -1  -2  273.41    3.03   0
   2  -8  -1   40.79    4.14   0
   3  -7 -11   93.41    5.53   0
   3  -5 -12   79.74    5.24   0
   4  -6  -8   -1.12    4.95   0
   4  -5  -1   20.43    3.81   0
   4  -2  -1   10.70    2.19   0
   4  -1  -5   31.83    2.20   0
   4  -1  -4   60.03    2.25   0
   4  -1  -3  465.72    3.62   0
   1 -10  -4   52.52    4.62   0
   3  -8  -4  191.51    6.45   0
   3  -6   0    3.32    3.90   0
   2  -9 -10    7.87    4.89   0
   2  -9  -4    9.35    5.65   0
   2  -7   0    5.29    4.82   0
   3  -8  -8   -0.09    5.11   0
   3  -8  -7    9.61    5.50   0
   3  -8  -6   13.36    5.44   0
   3  -8  -5   38.64    5.37   0
   3  -4   1  573.41    4.34   0
   3  -3   1  278.57    2.99   0
   4  -6  -7   23.85    5.71   0
   4  -6  -6  351.37    7.24   0
   4  -6  -5   49.95    6.04   0
   4  -5  -8    9.90    4.72   0
   4  -4  -1  586.27    4.87   0
   4  -3  -8  171.45    4.58   0
   4  -3  -1  144.43    3.21   0
   4  -2  -2  372.64    3.78   0
   1 -10  -5   16.19    5.14   0
   2  -9  -5    5.61    6.44   0
   2  -8 -12    5.97    4.58   0
   2  -7 -13   -3.76    4.50   0
   2  -6   1    5.34    2.75   0
   2  -4   2  129.63    2.27   0
   3  -7 -10  111.14    5.70   0
   3  -6 -11    0.79    5.33   0
   4  -5  -3   51.29    4.46   0
   1 -10  -6   16.52    6.01   0
   2  -9  -9   45.55    5.17   0
   2  -9  -6   25.29    5.28   0
   2  -8  -2    3.06    4.90   0
   3  -6  -1   36.62    3.82   0
   3  -5 -11   73.43    6.52   0
   3  -5   0  214.10    3.74   0
   3  -4 -11   18.75    4.55   0
   4  -4  -2  164.30    4.02   0
   4  -3  -7    3.26    4.25   0
   4  -3  -2  231.20    3.67   0
   4  -2  -5   27.53    2.48   0
   4  -2  -4 1030.93    5.60   0
   4  -2  -3 1308.83    6.04   0
   1 -10  -8  130.44    6.15   0
   1 -10  -7   34.19    5.01   0
   2  -9  -8  169.81    6.15   0
   2  -9  -7   78.97    5.69   0
   3  -7  -9    1.58    5.10   0
   4  -5  -5  104.75    5.33   0
   4  -4  -7   13.92    4.21   0
   4  -4  -3  438.84    5.09   0
   4  -3  -6  103.63    3.79   0
   4  -3  -3  197.78    3.69   0
   2  -8 -11  186.54    6.99   0
   2  -5 -13   -0.07    4.91   0
   3  -7  -8    8.31    5.65   0
   3  -4   0  764.46    4.78   0
   3  -3 -10   -0.60    4.42   0
   3  -2  -9   55.88    3.34   0
   4  -4  -6   66.35    4.22   0
   4  -4  -5    5.84    3.76   0
   4  -4  -4  392.67    5.06   0
   4  -3  -5  120.40    3.50   0
   4  -3  -4   70.58    3.46   0
   1  -9 -12   -7.53    4.97   0
   1  -8  -1   -1.71    3.90   0
   2  -8  -3   13.08    4.81   0
   2  -7 -12   -1.43    5.16   0
   2  -5   1    2.81    2.13   0
   3  -7  -7   24.80    5.02   0
   3  -7  -5    1.37    4.95   0
   3  -3   0  262.57    2.94   0
   3  -1  -7  156.85    2.48   0
   0 -10  -4   39.66    4.48   0
   1  -7 -14   -5.08    4.71   0
   2  -8 -10  181.00    6.01   0
   2  -6   0    7.17    2.86   0
   3  -5 -10   17.12    4.85   0
   3  -5  -1  563.33    4.98   0
   1  -9 -11   52.18    5.53   0
   1  -9  -4   25.78    5.08   0
   1  -8 -13   50.17    5.02   0
   1  -6   1  183.92    3.31   0
   2  -8  -9   -0.93    5.26   0
   2  -8  -4    1.12    4.31   0
   2  -6 -12    6.19    6.02   0
   3  -6  -3    6.28    4.08   0
   3  -1  -6   25.87    1.98   0
   0 -10  -5   -1.39    4.85   0
   0  -9  -2   10.58    3.91   0
   2  -8  -8   20.83    5.62   0
   2  -8  -5   36.10    4.99   0
   2  -7 -11    5.63    5.23   0
   2  -7  -2   33.37    4.28   0
   2  -4 -12    0.90    4.86   0
   2  -4   1   37.41    1.96   0
   3  -6  -8    6.41    5.11   0
   3  -6  -4  101.32    4.55   0
   3  -5  -2    1.62    3.17   0
   3  -4  -1  102.62    2.93   0
   3  -3  -9  142.58    4.09   0
   3  -3  -1   72.11    2.26   0
  -1 -11  -7    5.10    4.12   0
   0 -10 -11    2.74    4.68   0
   1  -9 -10   -0.69    4.79   0
   1  -9  -5   55.44    5.02   0
   1  -8  -2   18.88    4.32   0
   2  -8  -7  161.76    5.98   0
   2  -5 -12   -3.72    4.59   0
  -1 -11  -9   86.67    4.80   0
  -1 -11  -8    2.95    4.22   0
   0 -10 -10   67.78    5.32   0
   0 -10  -6   20.32    5.24   0
   1  -9  -9   73.38    5.45   0
   1  -9  -6  139.14    5.72   0
   1  -8 -12   67.24    5.72   0
   2  -7 -10  205.91    6.22   0
   2  -7  -3  126.31    4.44   0
   2  -5   0    1.86    2.18   0
   3  -5  -3    6.11    3.21   0
   3  -4  -2   32.97    2.63   0
   3  -3  -8    8.81    2.95   0
   3  -2  -7  109.19    2.84   0
   0 -10  -8   -4.69    5.03   0
   0 -10  -7   -1.88    5.17   0
   0  -9 -13    9.25    4.85   0
   1  -9  -8   20.24    5.12   0
   1  -7 -13   15.96    5.18   0
   2  -6 -11    1.36    4.80   0
   3  -5  -7    8.79    4.14   0
   3  -5  -4   25.22    3.51   0
   3  -4  -8   16.82    4.24   0
   3  -3  -2  196.61    2.71   0
  -1 -10  -4   23.27    4.86   0
   0  -8 -14   17.04    4.38   0
   0  -8  -1   13.58    3.14   0
   1  -7  -1   49.12    3.09   0
   2  -7  -9  255.60    6.08   0
   3  -5  -6   29.58    3.97   0
   3  -4  -7  159.19    3.87   0
   3  -3  -7   32.15    3.06   0
   3  -2  -6   10.80    1.93   0
   3  -2  -5  813.15    4.46   0
   3  -2  -4  561.62    3.70   0
   3  -2  -3  496.99    3.16   0
  -2 -11  -6   -0.79    4.67   0
   0  -9 -12   21.97    5.11   0
   1  -8 -11   -1.97    5.19   0
   1  -6 -13    2.75    4.98   0
   1  -5   1   99.98    2.28   0
   2  -6 -10    3.04    4.39   0
   2  -5 -11   13.45    4.67   0
   2  -4 -11   18.63    3.71   0
   2  -4   0    7.41    1.77   0
   3  -4  -6   30.12    3.16   0
   3  -3  -6  184.68    3.38   0
   3  -3  -3   53.81    2.30   0
   1  -7 -12  105.16    6.05   0
   2  -5  -1    5.70    2.21   0
   3  -4  -5   47.94    3.29   0
   3  -3  -5  382.78    3.80   0
   3  -3  -4  439.94    3.90   0
  -2 -11  -7    2.92    3.76   0
  -1 -10 -12    1.84    4.58   0
  -1 -10  -5  161.39    5.08   0
  -1  -9 -14   25.12    5.24   0
   0  -9  -4    5.38    4.43   0
   1  -8 -10   22.99    5.24   0
   2  -6  -3    0.98    3.05   0
  -2 -11  -8   15.24    4.12   0
  -1  -8 -15   -1.63    3.75   0
   0  -9 -11   -6.24    4.60   0
   0  -8 -13    8.11    5.33   0
   0  -7 -14   12.69    4.95   0
   1  -8  -9   -0.93    5.27   0
   2  -4 -10    3.61    3.40   0
   2  -2  -9    8.36    1.98   0
  -2 -11  -9    3.48    4.38   0
  -1 -10 -11    2.43    4.75   0
  -1 -10  -6   41.02    5.14   0
   0  -9 -10    8.71    4.94   0
   1  -8  -7   16.89    5.19   0
   1  -8  -6   89.27    4.90   0
   2  -6  -4   69.29    3.61   0
   2  -5  -2   78.38    2.68   0
   2  -4  -1  318.12    3.02   0
  -1 -10  -7   24.74    4.91   0
   0  -9  -6   11.96    4.82   0
   0  -6 -14    3.92    5.70   0
   1  -6  -1  136.45    2.79   0
   2  -6  -7    2.02    3.96   0
   2  -6  -5   88.94    3.77   0
   2  -5  -9    2.26    3.96   0
  -2 -10  -4   13.08    3.60   0
  -2  -9 -15   -0.55    4.19   0
  -1 -10  -9   22.57    5.01   0
  -1 -10  -8  108.03    5.21   0
  -1  -9 -13   -4.56    4.59   0
   0  -9  -8   63.40    5.13   0
   0  -8 -12  113.12    6.31   0
   0  -5 -14    6.11    5.33   0
   1  -7 -10   24.18    5.06   0
   1  -7  -3   22.19    3.54   0
   1  -5 -12    4.14    4.16   0
   1  -5   0  178.15    2.43   0
   1  -4 -12    9.16    4.19   0
   2  -5  -3    7.41    2.65   0
   2  -4  -9  162.48    4.24   0
   2  -3  -9   41.06    2.80   0
   2  -2  -8   26.90    2.27   0
  -2 -10 -13    7.69    4.30   0
   0  -8  -3    1.33    3.10   0
   0  -7 -13   29.01    5.55   0
   0  -7  -1  147.77    2.99   0
   1  -6 -11   92.05    5.27   0
   2  -5  -8    2.65    3.31   0
   2  -4  -2  367.55    3.25   0
  -3 -11  -7   11.51    3.77   0
   0  -8 -11    5.54    5.02   0
   1  -7  -4  176.25    3.97   0
   2  -5  -7   29.17    3.31   0
   2  -5  -5   23.23    3.01   0
   2  -5  -4  237.74    3.57   0
   2  -4  -8   11.12    2.86   0
   2  -3  -8  113.80    2.84   0
  -3 -11 -11   13.93    4.31   0
  -3 -11  -8    2.35    4.81   0
  -2 -10 -12    0.14    4.17   0
  -2 -10  -5    1.88    3.83   0
  -1  -6 -15   20.13    4.80   0
   0  -8  -4  327.32    5.34   0
   0  -6   0  178.28    2.40   0
   1  -6  -2    6.02    2.18   0
   2  -4  -3  579.25    3.82   0
   2  -2  -7    1.73    1.59   0
  -3 -11 -10   44.68    4.31   0
  -2  -9 -14   20.65    4.11   0
  -2  -7 -16    7.78    3.41   0
   0  -8 -10    3.15    4.88   0
   0  -7 -12   49.07    5.47   0
   0  -6 -13   12.67    4.60   0
   1  -7  -7    5.10    2.80   0
   1  -7  -6   47.73    2.89   0
   1  -5 -11   62.49    4.85   0
   1  -5  -1   43.83    1.67   0
   1  -3 -11    6.27    2.68   0
   2  -4  -7   39.89    2.61   0
   2  -4  -4   23.06    2.11   0
   2  -3  -7   77.69    2.22   0
  -3 -10 -14    1.57    3.91   0
  -2 -10 -11   26.46    4.44   0
  -2 -10  -6   -0.93    4.12   0
  -1  -9 -11   -6.99    4.66   0
  -1  -8 -13   19.82    5.37   0
  -1  -8  -2    4.40    2.91   0
   0  -8  -9    6.08    4.98   0
   0  -8  -5    9.69    3.97   0
   0  -7  -2   33.02    2.52   0
   1  -6  -3   10.41    2.33   0
   1  -4 -11    2.60    3.15   0
   2  -4  -5  588.02    4.54   0
   2  -3  -3  267.48    2.60   0
   2  -2  -6    7.01    1.47   0
  -2 -10 -10   12.52    5.17   0
  -2 -10  -7   -0.63    4.52   0
  -2  -8 -15    0.73    3.89   0
  -1  -9 -10    9.80    4.90   0
  -1  -7 -14   -5.74    5.03   0
   0  -5 -13   -0.09    3.54   0
   1  -6  -9  106.36    4.24   0
   2  -3  -6    4.89    1.84   0
   2  -3  -5   13.58    1.78   0
   2  -3  -4  593.63    3.54   0
 -10  -9  -2   -2.49    4.10   0
 -10  -8  -3    4.89    5.11   0
 -10  -6  -3  236.85    7.16   0
 -10  -5  -2  127.64    5.47   0
  -9  -8  -5   21.61    6.07   0
  -9  -7  -5   37.20    5.96   0
  -7  -5  -6   13.93    3.68   0
  -6  -2  -4  335.55    3.61   0
  -5 -10  -4    5.52    4.46   0
  -5  -4  -6    8.49    2.39   0
  -4  -7  -6  124.90    3.83   0
 -10  -7  -3    0.44    5.15   0
  -9 -10  -2   16.62    5.46   0
  -9  -9  -4  217.40    6.22   0
  -7  -2  -3   13.60    2.99   0
  -6  -3  -5  510.35    4.64   0
 -10  -8  -2   37.39    5.00   0
 -10  -6  -2   -6.01    5.52   0
 -10  -5  -1   12.71    4.58   0
  -8  -5  -5   60.70    4.66   0
  -8  -3  -3  181.44    5.26   0
  -7 -10  -4   62.13    5.90   0
  -7  -7  -6   17.67    4.59   0
  -6 -10  -4   75.46    5.32   0
  -6  -5  -6  174.10    4.17   0
  -5  -3  -5  104.91    2.67   0
  -4  -6  -6  213.39    3.43   0
 -10  -7  -2   51.21    5.51   0
  -9  -8  -4   10.60    5.62   0
  -9  -6  -4    7.89    4.87   0
  -8  -4  -4  225.00    5.16   0
  -7  -9  -5    1.73    5.15   0
  -7  -4  -5   40.00    3.32   0
  -7  -3  -4   40.66    3.21   0
  -6  -9  -5   11.39    4.59   0
  -5  -7  -6   83.12    4.11   0
  -5  -6  -6   -1.97    2.94   0
  -5  -5  -6   38.63    3.12   0
  -5  -2  -4  381.92    3.50   0
 -10  -8  -1   11.79    4.60   0
 -10  -6  -1   43.93    6.07   0
 -10  -5   0   -0.41    4.48   0
  -9  -7  -4   50.15    5.84   0
  -8  -9  -4   15.13    5.64   0
  -8  -6  -5   37.27    4.94   0
  -5 -10  -3   70.18    5.38   0
 -10  -8   0   16.33    4.39   0
 -10  -7  -1    9.50    5.00   0
 -10  -5   1    0.26    4.56   0
  -7 -10  -3  289.31    7.16   0
  -6 -10  -3    7.35    5.69   0
  -3  -8  -4   65.26    3.12   0
  -3  -6  -5   64.08    2.47   0
 -10  -7   0   -0.29    5.77   0
 -10  -6   0   19.93    4.51   0
  -9  -9  -2   13.20    4.80   0
  -9  -8  -3  187.77    6.36   0
  -7  -9  -4    5.95    5.56   0
  -7  -5  -5  180.74    4.43   0
  -6  -8  -5   14.98    4.44   0
  -6  -4  -5  516.77    5.03   0
  -5  -8  -5   19.07    4.19   0
 -10  -7   1    4.06    4.82   0
 -10  -6   1    5.67    5.59   0
  -9  -7  -3  169.75    6.00   0
  -9  -6  -3   21.37    4.88   0
  -8 -10  -1   17.52    5.53   0
  -8  -9  -3    1.59    5.57   0
  -8  -5  -4   56.02    4.71   0
  -7  -6  -5    1.47    4.21   0
  -7  -2  -2   20.15    2.46   0
  -6  -9  -4   20.67    5.05   0
  -6  -3  -4  586.10    4.93   0
  -6  -2  -3  573.00    4.33   0
  -5  -4  -5  483.05    4.35   0
  -4  -4  -5  122.87    2.63   0
 -10  -7   2   14.87    4.44   0
 -10  -6   2   14.16    4.01   0
  -9  -9  -1   58.83    4.69   0
  -9  -8  -2   48.24    6.78   0
  -8  -6  -4    8.15    4.87   0
  -7 -10  -2   69.96    5.86   0
  -7  -4  -4   47.71    3.21   0
  -6  -5  -5  107.52    3.73   0
  -5 -10  -2   17.64    5.21   0
  -9  -9   0   74.76    4.83   0
  -6 -10  -2  146.86    5.56   0
  -6  -7  -5   23.50    4.03   0
  -5  -7  -5    3.25    3.25   0
  -5  -5  -5   21.22    2.72   0
  -4  -5  -5  720.02    4.77   0
  -9  -9   1   13.11    4.05   0
  -9  -7  -2   63.69    5.71   0
  -9  -4   0    4.25    4.76   0
  -8 -10   1   77.08    4.71   0
  -8  -9  -2   10.20    5.09   0
  -8  -8  -3   94.34    6.13   0
  -7 -10  -1   13.61    6.19   0
  -5  -6  -5  140.70    3.63   0
  -5  -3  -4  125.05    2.56   0
  -9  -8  -1   20.08    5.30   0
  -9  -5  -1   22.70    4.50   0
  -8  -3  -1  173.62    4.12   0
  -7  -5  -4   33.90    3.67   0
  -6  -9  -3   45.55    5.86   0
  -6  -8  -4    8.43    4.24   0
  -6  -1  -1   74.75    2.08   0
  -5  -8  -4  154.84    5.04   0
  -9  -8   0   29.02    4.84   0
  -9  -7  -1    8.95    4.75   0
  -9  -6  -1    7.10    5.39   0
  -8  -9  -1   -1.00    5.83   0
  -8  -6  -3    5.45    4.49   0
  -7 -10   0   -2.61    5.31   0
  -7  -6  -4   52.35    4.15   0
  -6 -10  -1  243.36    5.60   0
  -6  -4  -4  172.25    3.50   0
  -5 -10  -1   -3.48    4.25   0
  -3  -8  -3   46.43    2.89   0
  -9  -4   1    9.15    4.28   0
  -8  -8  -2   45.29    5.43   0
  -7  -9  -2  310.68    6.40   0
  -7  -4  -3   17.68    2.79   0
  -3  -6  -4   12.01    2.33   0
  -9  -8   1   36.59    4.73   0
  -9  -8   2    7.32    4.06   0
  -9  -7   0  111.16    5.60   0
  -9  -4   2   79.94    4.66   0
  -8  -9   0    7.53    4.61   0
  -6  -5  -4  221.31    3.80   0
  -6  -3  -3   52.79    2.36   0
  -6  -2  -2   78.04    2.22   0
  -5  -7  -4    6.95    2.87   0
  -5  -4  -4   46.77    2.17   0
  -4  -7  -4   79.60    3.03   0
  -9  -8   3   47.65    4.42   0
  -9  -6   0   25.06    4.86   0
  -9  -5   1   69.01    4.83   0
  -9  -4   3  196.44    5.19   0
  -8  -7  -2   12.76    4.83   0
  -8  -3   0    0.91    2.99   0
  -6  -9  -2    2.31    4.08   0
  -6  -6  -4    5.80    3.08   0
  -5 -10   0   -1.70    4.15   0
  -4  -8  -3   13.29    3.95   0
  -4  -4  -4 1185.65    5.23   0
  -3  -5  -4   45.29    1.88   0
  -9  -7   1    5.04    4.92   0
  -9  -6   1   50.27    4.72   0
  -8  -9   1   71.96    4.59   0
  -8  -8  -1   38.92    5.22   0
  -8  -4  -1    5.77    3.98   0
  -7  -6  -3   10.95    3.75   0
  -7  -5  -3  233.23    4.28   0
  -6  -8  -3   47.56    4.17   0
  -5  -6  -4   41.23    2.85   0
  -5  -5  -4  822.73    5.04   0
  -4  -6  -4   20.89    2.22   0
  -4  -5  -4  176.77    2.72   0
  -9  -7   2   21.12    4.72   0
  -9  -7   3    1.69    4.19   0
  -9  -6   2    8.43    5.67   0
  -9  -5   2   27.51    4.41   0
  -9  -5   5    2.55    3.78   0
  -8  -9   2  110.94    4.83   0
  -8  -9   3   13.97    3.76   0
  -7  -2   0   21.32    2.64   0
  -6  -1   0  161.01    2.50   0
  -5 -10   1  101.39    4.92   0
  -2  -6  -3  150.05    2.25   0
  -9  -6   4    1.48    3.92   0
  -9  -6   5   10.21    3.45   0
  -9  -5   3    2.34    4.20   0
  -9  -5   4   13.98    4.04   0
  -8  -8   0   14.26    4.88   0
  -8  -7  -1  307.83    5.73   0
  -8  -5  -1   23.55    4.12   0
  -8  -3   1   71.90    3.73   0
  -7  -9   0   -3.24    4.92   0
  -7  -4  -2  127.57    3.16   0
  -6 -10   2    9.94    3.71   0
  -6 -10   3    8.32    4.35   0
  -6  -9  -1   58.95    5.28   0
  -6  -7  -3   31.63    3.87   0
  -6  -4  -3  104.71    2.85   0
  -5  -3  -3   43.23    1.85   0
  -3  -8  -2   19.83    3.47   0
  -8  -4   0   69.16    3.55   0
  -7  -7  -2  174.98    4.74   0
  -7  -3  -1   57.64    2.73   0
  -5  -9  -1    4.79    3.68   0
  -8  -8   1    1.71    4.51   0
  -8  -7   0  106.33    5.20   0
  -7  -9   1   20.62    4.63   0
  -7  -8  -1   19.29    4.42   0
  -7  -5  -2   28.48    3.25   0
  -6  -5  -3   41.92    2.79   0
  -6  -3  -2   26.50    2.01   0
  -6  -2  -1   57.05    1.92   0
  -5 -10   3   -2.25    4.27   0
  -5  -7  -3  236.04    3.79   0
  -4  -7  -3    2.39    2.60   0
  -2  -7  -2    4.70    2.13   0
  -8  -8   2   18.51    4.48   0
  -8  -3   2   -2.58    3.35   0
  -7  -9   2    2.90    4.41   0
  -7  -6  -2  177.73    4.40   0
  -6  -9   0   47.47    4.77   0
  -5  -8  -2    4.66    3.51   0
  -5  -4  -3  254.90    2.85   0
  -4  -8  -2   11.96    2.78   0
  -3  -6  -3   72.69    2.12   0
  -8  -8   3   62.54    4.24   0
  -8  -8   4   57.76    4.41   0
  -7  -9   3   47.68    4.43   0
  -7  -9   4   16.25    3.85   0
  -5  -6  -3   47.20    2.84   0
  -7  -8   0  103.41    4.78   0
  -7  -4  -1  257.83    3.76   0
  -7  -3   0  558.66    5.02   0
  -6  -9   1    3.01    4.63   0
  -6  -7  -2   40.29    4.18   0
  -5  -9   0    4.80    3.84   0
  -5  -5  -3  301.08    2.98   0
  -4  -9   0    3.61    3.60   0
  -4  -6  -3   60.70    2.33   0
  -4  -4  -3  982.32    4.57   0
  -3  -5  -3  491.03    3.24   0
  -8  -7   2   12.59    4.60   0
  -8  -7   6   18.55    3.98   0
  -7  -6  -1  314.06    5.22   0
  -7  -5  -1   21.95    3.23   0
  -6  -4  -2  280.40    2.96   0
  -4  -5  -3  105.74    2.26   0
  -3  -9   1   68.57    4.38   0
  -3  -8  -1    5.51    2.48   0
  -3  -7  -2    7.19    2.45   0
  -8  -7   3   12.19    4.44   0
  -8  -7   4   21.93    4.30   0
  -8  -6   2   21.82    4.01   0
  -8  -6   7  107.57    3.77   0
  -7  -8   1    2.99    4.59   0
  -6  -9   2   75.03    4.82   0
  -6  -5  -2   12.91    2.61   0
  -5  -9   1    0.99    4.25   0
  -5  -7  -2  170.23    3.51   0
  -5  -3  -2   16.17    1.71   0
  -8  -5   2  107.69    4.59   0
  -8  -4   3   23.56    3.68   0
  -8  -4   7   42.40    3.49   0
  -7  -8   2   -0.64    4.70   0
  -7  -2   2  114.67    2.83   0
  -6  -9   3   20.49    4.23   0
  -6  -3  -1  282.36    3.09   0
  -4  -9   1  169.78    4.44   0
  -4  -7  -2   11.30    2.56   0
  -2  -6  -2   50.55    2.13   0
  -8  -6   3   10.25    4.49   0
  -8  -6   4   22.65    4.52   0
  -8  -6   5    1.99    4.51   0
  -8  -5   3   79.52    4.55   0
  -8  -5   7   65.69    3.65   0
  -8  -4   5   80.85    4.73   0
  -8  -4   6   25.57    3.56   0
  -7  -8   3    6.75    4.43   0
  -7  -8   6    4.13    3.88   0
  -7  -6   0   20.19    3.91   0
  -7  -4   0    2.83    2.84   0
  -6  -9   4    3.79    4.12   0
  -6  -9   5    9.40    3.83   0
  -6  -7  -1  198.72    4.35   0
  -5  -9   2   89.80    4.51   0
  -5  -6  -2  150.65    3.28   0
  -8  -5   5   12.47    4.50   0
  -8  -5   6    0.35    3.90   0
  -7  -8   4   23.37    4.41   0
  -7  -8   5   24.52    3.72   0
  -7  -7   1   22.93    4.94   0
  -7  -5   0  173.46    4.07   0
  -5  -5  -2   70.73    2.42   0
  -5  -4  -2  638.93    3.93   0
  -4  -9   2   35.12    4.97   0
  -3  -9   2   37.51    3.61   0
  -2  -7  -1    5.97    1.85   0
  -7  -2   3    1.14    2.50   0
  -6  -8   1   12.91    4.02   0
  -6  -6  -1   35.37    3.21   0
  -6  -4  -1   27.14    2.36   0
  -5  -9   3    9.28    4.43   0
  -5  -7  -1   49.98    3.09   0
  -4  -6  -2   80.50    2.36   0
  -3  -8   0   24.38    2.89   0
  -3  -6  -2   48.74    1.91   0
  -7  -7   2   25.43    4.41   0
  -7  -6   1    9.78    4.31   0
  -7  -4   1    8.36    2.95   0
  -7  -3   2   37.96    3.22   0
  -6  -7   0    2.31    4.10   0
  -6  -5  -1   11.41    1.94   0
  -5  -9   4    9.11    4.54   0
  -5  -9   5    9.75    3.99   0
  -5  -9   6    3.87    3.70   0
  -4  -9   3   17.20    4.96   0
  -4  -8   0    6.60    3.17   0
  -3  -9   3    1.84    4.07   0
  -7  -7   3   17.02    4.25   0
  -7  -5   1   65.30    3.63   0
  -6  -3   0   83.43    2.21   0
  -6  -2   1  122.06    2.52   0
  -4  -7  -1   69.44    2.81   0
  -4  -5  -2   64.28    2.11   0
  -4  -4  -2  191.37    2.36   0
  -3  -7  -1  296.89    3.57   0
  -7  -7   4    3.23    4.58   0
  -7  -7   5   22.50    4.65   0
  -7  -7   6   89.27    4.58   0
  -6  -6   0  227.61    4.23   0
  -5  -6  -1  723.31    5.01   0
  -5  -3  -1  287.70    2.75   0
  -4  -9   4   10.52    3.98   0
  -4  -9   5   15.25    4.63   0
  -4  -9   7   95.85    3.93   0
  -3  -9   4  115.63    4.23   0
  -3  -5  -2  241.80    2.46   0
  -7  -5   2   49.74    3.91   0
  -7  -4   2   85.09    3.59   0
  -7  -3   3   88.50    3.57   0
  -6  -8   4    9.21    4.64   0
  -6  -8   5   -1.48    4.18   0
  -6  -8   6   19.57    4.22   0
  -6  -7   1   35.47    3.97   0
  -6  -4   0    4.37    2.30   0
  -5  -7   0    8.07    3.13   0
  -4  -8   1   -1.78    4.03   0
  -3  -9   5   17.59    3.84   0
  -3  -9   6   33.31    4.12   0
  -3  -9   7   10.02    3.27   0
  -3  -8   1   39.92    4.40   0
  -7  -6   3   23.76    4.08   0
  -7  -6   7   39.81    4.44   0
  -7  -4   9   62.54    4.47   0
  -6  -5   0  238.97    3.77   0
  -5  -5  -1  329.04    3.52   0
  -5  -4  -1   34.30    2.14   0
  -5  -2   0   30.24    1.53   0
  -7  -6   4   21.79    4.35   0
  -7  -6   5   73.04    4.56   0
  -7  -6   6   25.18    5.39   0
  -7  -5   8   17.56    4.18   0
  -7  -4   3  220.08    5.03   0
  -7  -3   8    7.45    3.98   0
  -6  -6   1   56.94    3.78   0
  -5  -8   8    8.42    4.78   0
  -4  -7   0  197.69    3.66   0
  -4  -6  -1  125.84    2.69   0
  -2  -7   0  210.25    2.93   0
  -2  -6  -1   49.49    1.86   0
  -7  -5   4   12.85    3.84   0
  -7  -5   7   90.40    5.67   0
  -7  -4   8    2.11    4.40   0
  -7  -3   7   26.22    4.45   0
  -6  -3   1   33.69    2.20   0
  -6  -2   2   26.29    2.00   0
  -5  -7   1   66.11    4.28   0
  -5  -6   0  536.70    4.72   0
  -3  -6  -1    9.52    1.80   0
  -2  -8   2  120.33    3.82   0
  -7  -5   6   40.81    4.47   0
  -7  -4   7   39.60    4.52   0
  -6  -7   7   49.97    4.46   0
  -6  -5   1   81.36    3.33   0
  -5  -8   4  156.07    4.92   0
  -5  -8   5    1.44    4.80   0
  -5  -8   6    8.81    4.72   0
  -5  -8   7   24.33    4.52   0
  -4  -5  -1  213.67    2.82   0
  -3  -8   2   99.46    4.06   0
  -7  -4   6    4.68    4.26   0
  -6  -7   4   14.49    5.03   0
  -6  -7   6   22.49    4.53   0
  -6  -6   2  187.31    4.60   0
  -5  -3   0   59.68    2.02   0
  -4  -4  -1    4.77    1.53   0
  -6  -6   9    7.64    4.23   0
  -6  -3   2    4.22    2.55   0
  -5  -7   2    7.22    3.93   0
  -5  -5   0  938.40    5.31   0
  -5  -4   0   89.08    2.52   0
  -3  -5  -1    8.41    1.62   0
  -1  -6   0  378.91    2.96   0
  -6  -6   3  203.74    4.79   0
  -6  -5  10    7.26    3.89   0
  -6  -4  11    5.68    3.54   0
  -6  -3  11   12.66    4.00   0
  -6  -2   3   -1.49    2.30   0
  -5  -7   9   50.57    5.44   0
  -5  -6   1    6.79    3.05   0
  -5  -2   1   39.41    2.06   0
  -4  -8   4  132.63    5.07   0
  -4  -8   5   36.04    5.50   0
  -4  -8   7    0.97    5.60   0
  -4  -6   0   11.13    2.39   0
  -2  -7   1  209.92    3.27   0
  -6  -6   8  213.97    5.43   0
  -4  -8   6    6.00    4.62   0
  -3  -8   4   26.82    4.51   0
  -3  -6   0 1097.68    5.42   0
  -6  -6   5    4.38    4.37   0
  -6  -6   6   88.59    4.83   0
  -6  -6   7  101.03    5.22   0
  -6  -5   3  109.04    4.28   0
  -6  -5   9   72.20    5.74   0
  -6  -3   3    4.49    2.72   0
  -6  -2   4    6.86    3.47   0
  -5  -7   8  207.62    5.08   0
  -3  -8   8    1.35    4.08   0
  -2  -6   0  385.19    3.16   0
  -6  -4   3  202.22    3.74   0
  -6  -4  10   -1.08    3.91   0
  -5  -7   6    3.28    4.90   0
  -5  -7   7   13.07    5.24   0
  -5  -6   2   10.50    3.27   0
  -5  -5   1   74.30    3.04   0
  -5  -3   1  324.26    3.16   0
  -4  -5   0    9.43    2.19   0
  -3  -8   6   56.70    4.98   0
  -3  -8   7   49.50    4.86   0
  -2  -8   5  399.62    5.67   0
  -6  -5   4  561.98    6.35   0
  -6  -5   8  152.25    5.85   0
  -6  -2   5   -1.18    3.48   0
  -6  -2   9    5.60    4.57   0
  -5  -6  10  107.09    5.07   0
  -5  -4   1  535.48    4.16   0
  -4  -7   3   11.39    3.82   0
  -4  -7  10   17.69    4.09   0
  -4  -6   1  755.74    5.15   0
  -3  -7   2  138.96    4.02   0
  -2  -8   6    6.09    4.08   0
  -2  -8   7   14.49    4.28   0
  -6  -5   6    0.67    4.30   0
  -6  -5   7    6.35    4.56   0
  -6  -4   9  126.16    5.36   0
  -6  -3   4   66.27    3.53   0
  -5  -6   3   25.20    3.84   0
  -4  -4   0  325.86    2.68   0
  -3  -7  11    0.32    3.76   0
  -2  -7   2   58.11    3.06   0
  -6  -4   5  548.29    6.04   0
  -5  -6   9  380.94    6.24   0
  -5  -5   2   47.92    3.12   0
  -5  -5  11   84.44    4.67   0
  -5  -4  12   37.65    3.85   0
  -5  -2   2  156.14    2.37   0
  -5  -1   3    8.68    1.69   0
  -4  -7   9   -1.71    4.54   0
  -3  -6   1 1753.99    6.80   0
  -3  -5   0   17.20    1.90   0
  -6  -4   7    0.29    4.68   0
  -6  -3   8    6.30    4.03   0
  -5  -6   4   -0.02    4.09   0
  -5  -6   8   14.90    4.96   0
  -4  -7   8   13.45    5.22   0
  -4  -5   1   33.32    2.47   0
  -1  -6   1  304.53    2.82   0
  -5  -6   6   12.93    5.38   0
  -5  -5   3  342.04    4.59   0
  -5  -5  10  215.05    5.76   0
  -5  -4   2   -0.43    1.88   0
  -5  -3   2  214.40    2.98   0
  -5  -3  12   -0.01    4.73   0
  -4  -7   6    5.70    4.55   0
  -4  -7   7   81.30    5.33   0
  -4  -6  11   27.33    4.48   0
  -2  -7  11    0.63    4.85   0
  -2  -6   1  130.55    2.51   0
  -5  -2  12   31.72    3.86   0
  -3  -7   9    3.43    5.60   0
  -5  -5   9    8.45    5.02   0
  -5  -4   3   10.07    3.00   0
  -5  -2   3  380.46    3.27   0
  -4  -6   3    0.20    3.40   0
  -4  -6  10   15.00    5.05   0
  -4  -4   1   39.72    1.87   0
  -3  -6   2   85.01    2.81   0
  -5  -5   5    4.88    4.00   0
  -5  -5   8   15.89    5.24   0
  -5  -3   3   44.12    2.53   0
  -4  -5   2   87.39    3.00   0
  -3  -7   6    5.94    4.08   0
  -3  -7   8   -2.98    5.26   0
  -3  -5   1  786.91    4.42   0
  -1  -7   4    2.15    3.43   0
  -5  -5   7   62.35    5.35   0
  -5  -4  10   13.27    5.02   0
  -5  -2  11   42.05    4.51   0
  -4  -6   4   84.52    4.28   0
  -4  -6   9   34.48    5.16   0
  -4  -2  14    4.30    3.29   0
  -2  -7   5  154.72    4.30   0
  -2  -7   9   31.99    5.23   0
  -2  -6   2  485.54    4.07   0
  -1  -7  10   26.44    5.56   0
   0  -7  10   29.01    4.50   0
  -5  -4   9   18.34    5.01   0
  -5  -2   4   56.52    2.43   0
  -5  -1  10    3.34    3.71   0
  -4  -6   5  278.45    5.44   0
  -4  -5  11   16.25    5.31   0
  -3  -6   3   39.93    3.00   0
  -3  -6  11  108.15    5.23   0
  -2  -7   8   22.74    4.90   0
  -1  -7   5  424.43    5.49   0
  -1  -6   2  482.82    3.91   0
  -5  -4   8    4.88    4.58   0
  -5  -3   4   98.56    2.97   0
  -5  -3  10   33.43    4.64   0
  -5  -2  10   53.10    4.36   0
  -4  -5   3  211.11    3.77   0
  -4  -4   2  286.31    3.26   0
  -4  -4  12   10.19    5.84   0
  -4  -3  13    1.90    4.33   0
  -2  -7   7    9.87    4.66   0
  -2  -6  12   56.59    4.52   0
  -2  -5   1  392.04    3.10   0
  -1  -7   9   32.78    4.77   0
   0  -7   7   16.24    4.67   0
   0  -7   8   19.37    4.90   0
   0  -7   9   -1.61    4.05   0
  -5  -4   6    4.18    4.00   0
  -5  -3   5  628.82    5.20   0
  -5  -3   9   -2.90    4.60   0
  -5  -1   7    2.43    3.53   0
  -5  -1   8   26.84    4.20   0
  -4  -5  10   61.96    5.41   0
  -3  -6  10   85.80    5.43   0
  -3  -4   1   62.86    1.98   0
  -1  -7   8    2.38    4.69   0
  -5  -2   6  154.44    3.64   0
  -4  -5   4   22.26    3.45   0
  -4  -3   2    2.83    1.83   0
  -4  -2  13    2.77    4.56   0
  -4  -1  13    5.85    4.45   0
  -3  -6   4  103.98    3.68   0
  -3  -6   9  117.07    5.79   0
  -3  -5   2 1120.63    5.47   0
  -3  -5  12   91.93    5.23   0
  -2  -6   3  332.32    4.03   0
  -5  -3   7   48.48    4.64   0
  -5  -2   8   16.32    3.70   0
  -4  -5   5  162.64    4.50   0
  -4  -5   9  118.74    5.77   0
  -4  -4   3   37.19    2.67   0
  -4  -4  11   70.60    5.74   0
  -3  -6   5    4.07    3.80   0
  -3  -6   8   24.52    5.46   0
  -3  -2  15    8.35    4.01   0
  -2  -6  11   18.01    4.92   0
  -1  -6   3  309.03    3.71   0
  -1  -6  12    1.45    4.80   0
  -4  -5   6  465.70    6.30   0
  -4  -5   8   15.50    5.79   0
  -4  -3  12    9.80    5.26   0
  -3  -1  15   15.98    4.48   0
  -2  -6   4   57.50    3.39   0
  -2  -5  13   22.42    4.90   0
  -4  -4  10   65.62    5.51   0
  -4  -3   3    2.44    2.17   0
  -4  -2  12   13.15    6.01   0
  -3  -5   3   20.25    2.68   0
  -3  -5  11   73.42    5.33   0
  -3  -3  14   10.73    4.75   0
  -2  -6  10    4.80    5.59   0
  -2  -5   2  108.58    2.37   0
  -1  -5  14    7.45    4.86   0
   1  -6  12   11.80    4.11   0
  -4  -4   4   48.22    3.01   0
  -4  -3  11    5.82    5.20   0
  -4  -2   3   24.95    1.84   0
  -4  -1  12   16.47    4.37   0
  -3  -4   2  320.53    3.07   0
  -2  -6   5    1.90    3.49   0
  -1  -6   4   80.16    3.12   0
  -1  -6  11  142.41    5.82   0
   0  -6   4  129.80    3.03   0
  -4  -4   9   18.79    5.17   0
  -3  -5   4   54.92    3.30   0
  -3  -5  10   92.20    5.38   0
  -3  -4  12    3.47    5.27   0
  -2  -6   6  117.23    4.58   0
  -2  -6   8   13.29    4.22   0
  -2  -5  12   -0.80    4.76   0
  -2  -4  14   -3.14    4.96   0
  -2  -3  15   41.52    6.05   0
  -1  -5   2  130.16    2.35   0
   0  -6  11   12.77    5.55   0
  -4  -4   6   67.64    3.75   0
  -4  -4   7  558.66    6.65   0
  -4  -3   4   47.85    2.60   0
  -4  -1   4  128.64    2.24   0
  -3  -5   9    6.63    5.61   0
  -3  -3  13    8.03    5.01   0
  -3  -2  14    4.32    4.84   0
  -1  -6   5   15.35    3.13   0
  -1  -6  10  107.50    5.57   0
  -1  -5  13   16.84    5.01   0
  -1  -4  15   29.10    4.70   0
   0  -5  14    5.04    4.42   0
   1  -6  11  115.68    5.35   0
  -4  -2   4   -1.09    1.89   0
  -4  -1  11  183.75    4.83   0
  -3  -5   5  426.18    4.97   0
  -3  -1  14   -4.73    5.54   0
  -3   0  14    7.10    4.85   0
  -2  -1  16   -2.19    4.41   0
   0  -6   5    1.31    2.80   0
   0  -6  10   19.13    5.81   0
   1  -6  10    7.90    5.13   0
  -4  -3   5    7.32    2.71   0
  -4   0   6   18.35    1.81   0
  -3  -4   3  241.65    2.72   0
  -3  -4  11   10.80    5.64   0
  -2  -5  11   -2.74    5.46   0
  -2  -4  13   51.42    5.33   0
  -2   0  16   -5.91    4.57   0
  -1  -6   7    2.75    4.19   0
  -4  -3   6   45.46    3.26   0
  -4  -3   7   17.51    3.43   0
  -4  -3   8  189.80    4.96   0
  -4  -2   5   33.69    2.37   0
  -4  -1   5  214.80    2.76   0
  -4   0   7  239.52    3.54   0
  -4   0   8  611.75    5.30   0
  -4   0   9  129.98    3.53   0
  -3  -3  12    7.90    5.06   0
  -3  -2  13    1.65    5.58   0
  -2  -2  15   24.28    6.23   0
  -1  -5  12  163.93    6.83   0
   0  -5  13   41.69    5.23   0
   1  -6   7   71.97    3.83   0
   1  -6   9    0.21    3.91   0
  -4  -2   6    9.35    2.47   0
  -4  -2   9   51.95    5.02   0
  -4  -1   6  152.75    3.35   0
  -4  -1   9   15.88    3.91   0
  -3  -4   4   35.49    2.59   0
  -3  -4  10   40.77    5.82   0
  -2  -5   4   81.84    2.81   0
  -2  -5  10   -2.82    5.38   0
  -1  -5   3  289.42    3.20   0
  -1  -4  14   13.23    5.01   0
   0  -4  15    4.61    5.29   0
  -4  -2   8    7.97    3.65   0
  -4  -1   7  289.87    3.87   0
  -3  -3   3   29.18    1.99   0
  -3  -1  13   25.57    5.26   0
  -3   0  13   95.46    5.64   0
  -2  -5   5  205.76    3.76   0
  -2  -4  12    7.88    5.57   0
  -1  -3  15    4.92    6.41   0
   0  -5   3   34.03    2.08   0
   2  -5  13    4.44    4.55   0
  -3  -4   5   43.65    3.05   0
  -3  -4   8  266.73    5.47   0
  -3  -3  11   23.28    5.44   0
  -3  -2  12   54.91    5.64   0
  -2  -5   6    5.96    3.37   0
  -2  -5   7   -1.84    4.14   0
  -2  -5   8  116.92    5.14   0
  -2  -1  15    0.49    4.77   0
  -1  -5  11   72.19    5.41   0
  -1  -2  16    8.45    4.92   0
   0  -5  12   45.68    5.50   0
   0  -3  16   42.03    5.35   0
   1  -4  15   25.93    4.83   0
  -3  -4   6  114.43    3.88   0
  -3  -4   7   85.35    4.07   0
  -2  -4   3  238.00    2.83   0
  -2  -3  13    6.26    5.36   0
  -1  -5   4  149.99    3.00   0
  -1  -4  13    5.62    5.36   0
  -3  -3   4  161.07    2.79   0
  -2  -4  11   -7.91    5.89   0
  -2  -2  14   35.11    5.64   0
  -2   0  15   10.61    4.43   0
  -1  -5  10    7.27    4.65   0
   0  -4  14   15.74    5.08   0
   1  -5   4    0.08    1.93   0
   1  -5  12  191.46    6.22   0
   2  -5  12   48.75    4.83   0
   2  -4  15   10.93    4.65   0
  -3   0  12   78.81    4.58   0
  -1  -5   5   16.25    2.46   0
  -1  -3  14    4.18    6.46   0
  -1  -1  16    3.24    5.09   0
   0  -5   4  258.87    3.23   0
   0  -5  11   24.87    5.25   0
   1  -3  16    4.09    6.20   0
  -3  -3   5  231.04    3.45   0
  -3  -3   8   -0.01    3.68   0
  -2  -4   4  289.67    3.37   0
  -2  -3  12    6.32    5.37   0
  -2  -1  14   -6.86    5.33   0
  -1  -5   7   -7.31    4.12   0
  -1  -5   8  226.14    5.27   0
  -1  -4  12   12.85    5.59   0
  -1  -2  15   18.35    5.48   0
   0  -3  15    4.84    5.20   0
   1  -5  11   25.61    5.37   0
   1  -4  14   -1.81    5.26   0
   2  -5  11   47.23    5.74   0
  -3  -3   6    1.74    2.75   0
  -3  -3   7  126.01    3.73   0
  -3  -2   4   76.91    2.21   0
  -3  -2  10   19.81    4.25   0
  -2  -4   9   15.91    4.39   0
  -2  -2  13   -2.37    4.90   0
   0  -5   5  247.36    3.68   0
   0  -4  13   13.31    6.40   0
   0  -2  16   -9.52    5.45   0
   0  -1  17   20.63    5.49   0
   1  -2  17   -3.08    4.75   0
  -2  -5   6    5.14    3.23   0
  -2  -2   7   23.30    2.81   0
  -1  -2  11  183.05    6.32   0
  -1   0   9  469.83    4.87   0
   0  -3  13   14.11    6.92   0
   0   1  11  136.79    5.04   0
  -2  -3   7   82.42    3.49   0
  -2  -2   6   98.03    2.56   0
  -1  -1  10   12.44    3.76   0
   0   0  12   16.25    4.93   0
   1   2  12   67.24    3.57   0
   2   1  15   14.99    5.35   0
  -2  -5   3  151.24    2.74   0
  -2  -5   4   90.91    2.73   0
  -2  -4   6  336.83    4.26   0
  -2  -2   5   48.30    2.22   0
   1  -3  14   18.94    6.70   0
   2  -7  10   -0.82    4.81   0
   2  -6  12    0.54    4.48   0
   2   2  14   -0.68    3.45   0
   4   1  17    0.45    4.63   0
  -2  -3   6  284.56    3.87   0
  -1  -6   7    2.18    3.88   0
  -1  -3  10    7.14    4.64   0
  -1  -2  10    4.16    4.03   0
  -1   0   8  646.59    4.76   0
   0  -7   7   17.28    5.55   0
   1  -7   9   11.53    4.49   0
   1  -2  14   50.40    6.88   0
   1   1  13    8.71    4.18   0
   3  -4  15   15.62    4.84   0
   4  -1  17   -1.04    4.56   0
  -2  -4   3  219.76    2.64   0
  -2  -4   4  292.37    3.16   0
  -2  -4   5   35.80    2.65   0
  -2  -3   4  120.23    2.46   0
  -2  -3   5  136.15    2.83   0
  -1   0   7  691.64    4.32   0
   0  -6   9   12.85    5.57   0
   0  -3  12    4.39    6.57   0
   0  -1  12   24.08    5.44   0
   1  -5  12  144.50    8.23   0
   1  -4  13   61.48    7.08   0
   2  -4  14   -2.90    5.52   0
   2  -2  15   -6.57    5.95   0
   2   0  15    3.69    5.24   0
   3  -2  16    0.80    4.92   0
   4   0  17    6.25    4.57   0
  -1  -6   6   16.45    4.27   0
  -1  -5   8  217.30    5.56   0
  -1  -4   9   62.31    5.50   0
   2  -1  15   23.15    5.81   0
   3  -6  12   27.83    5.96   0
   3  -1  16    0.51    5.63   0
   3   0  16   39.86    5.76   0
   3   2  15    2.20    4.19   0
  -1  -3   9   56.20    4.27   0
  -1  -2   9    4.44    3.46   0
   0  -5  10  119.70    5.89   0
   0  -4  11   30.67    6.04   0
   1  -7   8   32.17    5.10   0
   1  -6  10    8.60    6.63   0
   1  -3  13   20.28    6.49   0
   2  -7   9    9.95    5.22   0
  -1  -6   5   12.14    3.34   0
  -1  -5   7    3.27    3.73   0
  -1  -1   8  206.57    3.61   0
   0   1   9   12.22    2.18   0
   1   1  12    1.56    3.77   0
   2  -3  14   12.54    5.81   0
   2   2  13    1.26    3.79   0
   3  -3  15   -2.04    5.11   0
   5   1  17    2.72    4.43   0
  -1  -6   3  175.27    3.98   0
  -1  -6   4   70.30    3.00   0
  -1  -4   8   59.74    4.14   0
   0  -3  11   25.14    5.37   0
   0  -2  11   45.96    5.10   0
   0  -1  11   19.01    4.12   0
   1  -5  11   13.18    6.32   0
   1  -4  12   82.18    6.48   0
   1  -2  13    4.09    6.15   0
   4  -2  16    3.85    4.88   0
  -1  -1   7  196.07    3.09   0
   1  -7   7   -3.17    3.95   0
   1   2  10    0.38    2.20   0
   2  -5  12   46.56    7.07   0
   2  -4  13    0.52    6.63   0
   2  -2  14   -7.13    5.95   0
   3  -2  15    1.02    6.51   0
   3   1  15    1.63    5.06   0
   4   1  16   29.07    5.98   0
   0   1   8   50.03    2.18   0
   1  -6   9   -2.95    4.84   0
   2  -7   8    1.79    4.24   0
   2  -1  14   14.26    5.26   0
   3  -6  11    2.44    4.57   0
   4  -5  13   10.07    5.79   0
   4  -3  15    6.10    6.16   0
   4  -1  16    9.56    5.68   0
   4   0  16   14.43    6.45   0
  -1  -2   7    1.57    2.23   0
   0  -3  10   33.27    5.31   0
   1   0  12   17.68    4.77   0
   1   1  11  190.44    5.23   0
   2  -6  10    1.64    5.88   0
   3  -1  15   60.44    6.49   0
   3   2  14   65.12    3.94   0
   6   1  17    9.35    4.29   0
  -1  -3   7  488.13    4.96   0
   0   0   9   14.56    2.55   0
   1  -5  10    2.45    4.61   0
   1  -4  11    2.44    6.04   0
   1  -1  12   16.54    6.09   0
   2  -3  13    5.90    6.37   0
   2   1  13   -3.81    4.06   0
   2   2  12   21.10    2.95   0
   3  -3  14   -5.78    5.50   0
   4  -6  11   -2.50    4.15   0
   5   2  16    8.93    4.57   0
  -1  -5   4  145.56    2.87   0
  -1  -4   6  194.00    3.53   0
   0  -4   9    6.23    5.02   0
   1   2   9  135.50    2.64   0
   2  -7   7    7.63    4.95   0
   2  -5  11   40.64    6.41   0
   3  -4  13    7.58    5.55   0
   4   2  15   14.17    4.09   0
   5  -4  14   24.30    4.49   0
   5  -3  15    8.25    4.62   0
  -1  -5   3  276.63    3.09   0
  -1  -3   6   32.69    2.58   0
  -1  -2   6   84.08    2.40   0
   2  -4  12   63.25    7.29   0
   2  -2  13    4.74    6.27   0
  -1  -4   5    9.56    2.19   0
   0  -3   9   24.51    3.85   0
   0  -1   9  534.02    5.30   0
   1  -3  11   48.74    5.72   0
   2  -6   9    8.86    5.46   0
   3  -6  10    0.47    5.14   0
   3  -2  14   37.61    6.08   0
   5   0  16   32.49    5.66   0
   5   1  16    5.82    4.78   0
  -1  -4   4  112.44    2.35   0
  -1  -3   5  288.31    3.07   0
   0  -5   7    7.99    3.91   0
   0  -4   8    7.58    3.65   0
   0  -2   9  100.05    3.93   0
   0   0   8   43.00    2.33   0
   1   1  10  244.17    4.03   0
   3  -1  14    2.42    5.75   0
   4  -5  12   13.56    5.09   0
   4  -3  14   14.32    5.30   0
   4  -1  15    2.20    5.81   0
   4   0  15   70.81    6.85   0
   0  -6   4  131.66    3.24   0
   1  -6   7   68.35    5.54   0
   1  -2  11   -4.15    4.15   0
   2  -5  10   41.67    5.73   0
   2  -3  12    0.30    7.00   0
   2   1  12   35.11    3.97   0
   2   2  11    3.14    2.41   0
   3  -5  11   -1.91    6.45   0
   3  -3  13   47.97    6.93   0
   3   2  13    1.31    3.12   0
   4  -4  13   31.19    5.65   0
   5  -5  12   16.90    4.77   0
   5  -2  15    7.76    5.05   0
   6   2  16   17.17    3.88   0
   0  -6   3  399.74    5.15   0
   0  -5   6   46.50    4.20   0
   2  -4  11   23.20    5.94   0
   3  -4  12    9.96    6.10   0
   5  -6  10   15.74    4.11   0
   6   0  16    7.84    4.61   0
   0  -4   7  272.52    4.41   0
   0  -3   8  485.23    5.47   0
   0  -2   8  340.19    4.62   0
   0  -1   8   40.72    2.69   0
   1  -5   8  177.15    7.41   0
   1  -3  10  117.26    5.56   0
   2  -6   8    2.14    4.61   0
   2   0  12    1.63    4.23   0
   3  -6   9  132.98    6.47   0
   4  -2  14    1.05    5.45   0
   5  -4  13    1.86    5.19   0
   5   2  15    4.49    3.86   0
   6  -2  15    6.18    4.70   0
   6   1  16    4.84    4.54   0
   1  -6   6   -1.15    4.53   0
   1  -4   9  350.03    6.70   0
   1   0  10  133.12    3.89   0
   1   1   9  151.12    3.07   0
   3  -2  13   22.34    5.78   0
   4  -5  11   -1.54    5.89   0
   5  -1  15   32.23    5.90   0
   7   0  16    4.62    4.07   0
   0  -5   5  239.27    3.91   0
   1  -2  10    2.72    3.96   0
   4  -6   9    4.07    5.65   0
   4  -3  13    2.03    5.72   0
   5   0  15   -2.94    5.27   0
   5   1  15    5.72    4.81   0
   6  -3  14    9.15    5.02   0
   7   1  16   -2.41    4.84   0
   7   2  16    0.77    3.78   0
   0  -3   7  285.97    4.20   0
   0  -1   7   16.81    2.03   0
   2   1  11  209.92    4.58   0
   2   2  10   21.79    2.67   0
   3  -5  10  134.92    7.29   0
   3  -3  12   14.74    5.94   0
   3   0  13   -0.78    4.70   0
   3   2  12    4.31    3.69   0
   4  -4  12    3.95    5.41   0
   5  -6   9    9.28    5.55   0
   5  -5  11    7.87    4.90   0
   6  -5  11   14.63    5.28   0
   0  -4   6  311.63    4.10   0
   0  -2   7   67.83    2.54   0
   1  -6   5   12.05    3.44   0
   1  -5   7   83.85    4.51   0
   1  -3   9    5.39    3.84   0
   3  -6   8    6.53    5.05   0
   3  -4  11   -0.14    5.93   0
   5  -2  14   13.33    5.65   0
   6  -1  15    4.06    5.03   0
   0  -5   4  215.92    3.36   0
   1   0   9  275.95    4.13   0
   2  -2  11   88.02    6.32   0
   2   0  11   92.19    4.50   0
   5  -4  12   -0.29    5.36   0
   5  -3  13    2.35    5.39   0
   7  -1  15   -0.62    4.35   0
   0  -3   6  758.13    5.03   0
   1  -6   4   30.71    3.66   0
   1  -2   9   24.37    3.63   0
   1  -1   9   33.10    3.31   0
   2  -5   8   12.80    5.67   0
   2  -1  11   28.12    4.93   0
   4  -6   8   67.73    6.66   0
   4  -5  10   23.51    6.37   0
   4   2  13    7.29    3.58   0
   6  -4  12    0.51    4.30   0
   6  -2  14    0.14    4.61   0
   6   0  15    3.56    5.24   0
   6   1  15    4.53    4.99   0
   0  -5   3   30.52    2.09   0
   0  -4   5    8.14    2.18   0
   1  -5   6    3.92    4.35   0
   2  -6   6   10.98    4.20   0
   2  -3  10  112.31    6.23   0
   3  -6   7    1.12    5.35   0
   3  -5   9    0.42    5.72   0
   3   1  12   42.12    4.62   0
   5  -6   8   -2.20    5.57   0
   5  -1  14    6.73    4.90   0
   6  -3  13   -2.25    4.75   0
   7  -2  14    0.41    4.61   0
   0  -2   6   22.80    2.00   0
   1  -6   3   10.20    2.59   0
   1  -3   8  124.19    4.21   0
   2  -4   9   38.26    5.05   0
   2   1  10   40.53    3.02   0
   3  -1  12   23.84    5.07   0
   3   0  12    2.08    4.09   0
   4  -4  11    8.81    5.85   0
   4  -1  13   10.48    4.71   0
   5  -5  10    3.69    5.80   0
   5   0  14   34.51    6.02   0
   5   1  14   62.84    5.29   0
   6  -5  10   -2.57    4.02   0
   7  -3  13   -0.15    4.56   0
   7   0  15   -3.46    4.82   0
   1  -4   7   35.79    3.31   0
   2   2   9    1.18    2.02   0
   3   2  11  112.69    3.63   0
   4   1  13   21.38    4.31   0
   5  -2  13   -1.78    5.76   0
   5   3  13   -0.38    3.68   0
   7   1  15    4.49    4.77   0
   7   2  15    4.58    4.08   0
   8   0  15    4.66    4.35   0
   0  -4   4   90.70    2.41   0
   0  -3   5  200.27    2.96   0
   1   0   8   70.73    2.56   0
   2  -6   5   10.36    3.29   0
   2  -2  10   61.07    5.08   0
   4  -6   7    1.86    5.74   0
   5  -4  11   24.32    6.23   0
   6  -1  14   -9.67    5.49   0
   1  -5   5    3.31    2.72   0
   1  -2   8    5.34    1.91   0
   1  -1   8  388.64    4.50   0
   2   0  10  448.74    5.98   0
   3  -2  11    4.62    5.03   0
   5  -6   7   12.46    5.58   0
   6  -6   7   -3.64    4.13   0
   6  -4  11   -2.05    5.22   0
   7  -4  11    4.52    4.97   0
   7  -1  14   -0.39    4.85   0
   8  -1  14    0.43    5.46   0
   8   2  15    6.30    4.13   0
   2  -3   9  470.15    8.02   0
   4  -4  10   54.92    6.17   0
   5  -5   9   -2.62    7.57   0
   5  -1  13    2.38    5.41   0
   6  -3  12   -2.53    6.50   0
   6  -2  13    5.05    5.37   0
   6   0  14   19.28    5.50   0
   7  -5   9    0.96    4.53   0
   1  -4   6    1.76    2.71   0
   1  -3   7   90.57    3.52   0
   2  -6   4   42.11    3.83   0
   3  -4   9    6.99    5.27   0
   3  -3  10   30.59    5.83   0
   3  -1  11   13.42    4.40   0
   3   1  11   22.79    3.37   0
   6  -5   9   -7.97    5.37   0
   6   1  14    2.59    4.83   0
   7  -2  13   10.81    4.98   0
   8  -2  13    1.50    4.18   0
   1  -5   4    0.68    2.22   0
   2  -5   6   12.82    3.88   0
   2  -2   9    2.82    4.00   0
   3   0  11   33.05    3.85   0
   4  -1  12    7.91    4.97   0
   4   3  11    0.43    2.47   0
   7   0  14   22.48    5.10   0
   7   3  14   -1.71    4.01   0
   1  -2   7   25.56    2.49   0
   3  -6   5  104.45    4.85   0
   3  -5   7   -0.84    6.19   0
   3   2  10   16.25    2.94   0
   4  -5   8   -0.96    5.60   0
   4   0  12   21.11    4.61   0
   4   1  12  125.74    5.78   0
   5  -2  12    3.69    5.50   0
   6  -1  13   14.98    5.53   0
   8   0  14   17.76    5.05   0
   1  -1   7    9.71    2.11   0
   2  -4   7    5.92    3.44   0
   2  -1   9  234.46    5.30   0
   2   0   9  162.61    4.17   0
   6  -4  10   47.79    6.35   0
   6   3  13    5.68    3.56   0
   7  -5   8   10.15    4.64   0
   7   2  14    7.22    4.66   0
   8   3  14   32.34    4.99   0
   9  -1  13    1.58    4.09   0
   1  -5   3  392.81    4.76   0
   1  -4   5    3.64    2.30   0
   5  -5   8   -2.08    5.98   0
   6  -5   8   -2.09    6.50   0
   6  -2  12   15.68    6.06   0
   7  -1  13    8.73    5.27   0
   8  -3  11   17.14    4.76   0
   8  -1  13    0.31    5.08   0
   8   1  14   11.46    5.25   0
   9   1  14   -0.25    4.30   0
   2  -5   5   17.84    3.35   0
   3  -6   4   43.39    3.92   0
   3  -4   8    6.33    4.77   0
   3  -3   9  132.79    6.13   0
   6  -3  11   88.44    6.48   0
   6   0  13   -5.05    4.84   0
   7  -3  11   48.87    5.75   0
   7  -2  12   17.70    5.40   0
   8  -2  12   25.63    5.08   0
   8   2  14   50.84    5.57   0
   9   2  14   -0.31    3.81   0
   3   1  10  513.18    5.69   0
   4   2  11    2.94    2.86   0
   8  -4   9   16.15    4.64   0
   1  -5   2  178.71    3.44   0
   1  -2   6   85.26    2.66   0
   2  -2   8   60.88    3.02   0
   3  -5   6   22.59    4.14   0
   5  -4   9   13.16    5.49   0
   5   0  12  111.72    6.09   0
   5   2  12   47.22    4.46   0
   7  -5   7    4.57    5.30   0
   7   0  13   -0.81    5.41   0
   9   0  13   -0.30    4.11   0
   1  -4   4  108.12    2.93   0
   2  -4   6    1.33    3.09   0
   2  -3   7  313.82    5.27   0
   2  -1   8  226.32    4.52   0
   4   1  11  293.15    5.69   0
   4   3  10   21.41    2.76   0
   5  -5   7   86.01    6.42   0
   5  -3  10   17.34    6.29   0
   5   1  12   30.91    4.90   0
   6  -4   9   95.29    6.77   0
   6  -1  12   16.79    5.62   0
   7  -4   9    2.61    5.85   0
   7   3  13   -1.79    4.16   0
   8   0  13   10.72    6.08   0
   1  -3   5   -0.23    1.52   0
   2   0   8   39.66    2.99   0
   3  -4   7    1.06    4.11   0
   3  -2   9   45.52    3.78   0
   4  -4   8   32.57    6.35   0
   4  -2  10   42.01    5.38   0
   6  -5   7   13.63    5.74   0
   7   1  13   -0.99    5.29   0
   7   2  13   58.60    5.10   0
   9  -2  11    5.78    4.87   0
   9  -1  12    6.49    4.98   0
   3  -3   8  218.99    6.56   0
   4  -5   6   83.53    6.03   0
   6  -3  10   72.43    6.73   0
   6  -2  11   20.71    5.91   0
   6   3  12   60.46    3.96   0
   7  -3  10   17.39    5.78   0
   8  -4   8   20.48    4.56   0
   8  -2  11   20.65    5.25   0
   8   1  13   -0.74    6.06   0
   9   1  13   -5.84    5.06   0
  10   2  13   -4.10    3.93   0
  10   3  13    5.70    4.27   0
   3  -5   5   23.69    3.74   0
   3  -1   9   11.89    3.74   0
   5   3  11    2.74    2.73   0
   7  -5   6    8.26    4.76   0
   7  -2  11   24.90    6.38   0
   8   2  13    2.84    5.23   0
   9   3  13   -1.05    5.40   0
  10   0  12   10.47    4.51   0
   2  -4   5  192.27    4.09   0
   2  -2   7   25.00    3.00   0
   3   0   9  384.80    5.70   0
   3   1   9    7.54    2.41   0
   4  -1  10  121.33    5.64   0
   5  -5   6   69.05    5.71   0
   6   2  12   -0.36    4.16   0
   7  -4   8   15.68    6.18   0
   9   2  13   13.32    5.04   0
   2  -5   3  216.58    3.84   0
   2  -3   6   20.47    3.06   0
   4  -4   7  216.66    6.98   0
   4   2  10   29.50    2.99   0
   5  -2  10    5.42    3.73   0
   5   0  11   20.54    4.51   0
   6  -4   8   45.17    6.68   0
   7   0  12   -1.99    5.22   0
   9   0  12   -5.17    5.36   0
   2  -1   7   15.66    2.59   0
   3  -4   6    5.37    3.99   0
   3  -2   8   11.26    4.25   0
   4  -5   5  196.19    7.17   0
   4  -2   9   17.89    4.80   0
   4   1  10   38.73    3.37   0
   8  -4   7    4.67    6.13   0
   8  -3   9    2.06    5.46   0
   8   0  12    7.33    6.06   0
   9  -2  10   -5.71    5.27   0
   3  -5   4   40.28    3.83   0
   6  -3   9    7.95    6.45   0
   6  -2  10   -3.90    7.16   0
   7  -5   5   18.70    5.86   0
   7  -3   9   -3.96    6.37   0
   8  -2  10   10.49    7.40   0
   8  -1  11   10.49    5.90   0
   4   3   9  101.71    2.79   0
   5  -1  10   28.51    5.26   0
   8   1  12   14.73    6.06   0
   9   1  12   13.40    5.87   0
  10  -1  10   15.72    4.80   0
  10   0  11    3.73    4.71   0
   2  -4   4   36.24    2.73   0
   2  -2   6   40.30    2.97   0
   3  -1   8   75.17    4.09   0
   4  -1   9   29.45    4.24   0
   6  -5   5   40.85    6.10   0
   6  -4   7   68.57    7.31   0
   6   3  11   64.86    5.12   0
   7  -4   7   -3.61    6.59   0
   8   3  12    4.15    5.69   0
  10   3  12    5.86    4.46   0
   2  -3   5   19.90    2.90   0
   4  -5   4   42.80    6.32   0
   5  -3   8   39.48    5.93   0
   5  -2   9   56.81    5.87   0
   6   1  11    9.48    5.07   0
   7  -5   4   26.75    6.75   0
   8  -4   6   21.01    6.49   0
   8  -3   8    3.16    7.71   0
   8   2  12    5.90    5.54   0
   9  -2   9   16.12    5.92   0
   9   0  11   15.20    7.13   0
   9   2  12    6.97    6.42   0
   9   3  12    5.18    4.91   0
   3  -5   3  473.84    6.81   0
   3   0   8  222.88    4.77   0
   3   1   8   37.75    2.84   0
   6   2  11   14.50    4.21   0
   7   0  11    4.77    6.06   0
   8   0  11   -2.86    6.14   0
   9  -1  10   37.54    6.18   0
  10  -2   8   14.04    5.36   0
  11   2  11   -1.65    4.53   0
   3  -3   6   27.68    3.91   0
   3  -2   7   -0.45    2.74   0
   4  -3   7   38.91    5.28   0
   4  -2   8    8.80    3.25   0
   4   0   9  167.25    4.93   0
   4   2   9   80.28    3.23   0
   5   1  10   97.12    4.96   0
   5   2  10   -0.17    3.22   0
   6  -5   4   27.39    7.06   0
   7  -3   8   34.10    6.74   0
   8  -2   9   18.83    6.54   0
   9  -3   7   -1.92    5.43   0
  11   3  11   30.60    4.65   0
   5  -4   6  107.17    7.38   0
   6  -4   6   26.10    7.82   0
   7  -4   6    5.34    6.07   0
   7  -2   9   25.70    6.64   0
   7  -1  10   16.04    6.52   0
   8  -1  10   14.66    6.82   0
  10  -1   9   25.83    6.38   0
  10   0  10   39.58    6.29   0
  11   1  10   25.89    5.45   0
   2  -4   3   20.63    2.55   0
   5  -1   9    1.97    4.59   0
   7  -5   3    2.54    5.40   0
   7   2  11   -3.17    5.28   0
   7   3  11   24.06    5.12   0
   8  -4   5   16.46    5.51   0
   8   1  11    4.49    6.52   0
   9   1  11   39.11    7.16   0
   2  -2   5  366.76    4.53   0
   3  -5   2   26.03    3.49   0
   4  -5   3    4.78    4.35   0
   5  -3   7   51.32    6.04   0
   8  -3   7  114.67    8.06   0
   9  -2   8   -2.37    6.38   0
  10  -2   7   16.66    5.60   0
  10   3  11   37.14    7.34   0
  10   4  11    9.56    4.99   0
   2  -3   4  118.78    3.52   0
   5  -5   3    8.27    5.07   0
   6  -5   3    8.93    6.67   0
   7  -3   7    4.62    6.53   0
   8   2  11    4.72    5.36   0
   9  -1   9    8.75    6.31   0
   9   0  10   68.02    7.34   0
   9   2  11   12.00    6.17   0
   4  -3   6   34.71    4.94   0
   4  -2   7  387.62    7.44   0
   5  -4   5   54.45    6.85   0
   5   0   9    3.66    4.34   0
   6  -2   8    0.19    5.80   0
   6  -1   9    3.24    5.66   0
   6   1  10   11.03    4.87   0
   6   3  10    6.35    3.58   0
   7  -4   5   58.67    7.29   0
   8  -2   8  175.09    8.59   0
   8   0  10    7.92    6.30   0
  10  -1   8    4.07    6.08   0
   3  -3   5  568.28    7.21   0
   3  -2   6   14.44    2.92   0
   3   0   7   23.63    2.98   0
   4   0   8   73.95    4.10   0
   5   3   9  406.90    5.26   0
   6   2  10   19.98    4.62   0
   8  -4   4   26.52    6.61   0
   8  -1   9  159.85    8.58   0
  10   0   9    4.25    5.96   0
  11   0   8   13.28    5.52   0
  11   1   9   -1.88    5.52   0
  11   4  10   -0.45    4.59   0
   2  -4   2  148.19    3.39   0
   3  -5   1   16.17    3.46   0
   5   1   9   74.79    4.24   0
   7   1  10    3.60    6.15   0
   7   4  10   17.36    4.05   0
   8  -3   6    9.82    7.36   0
   9  -3   5   -0.46    6.43   0
   9  -2   7   16.89    7.11   0
   9   1  10    9.23    6.98   0
  10  -2   6   -0.91    5.73   0
   3  -4   3   76.84    4.56   0
   4  -4   4    7.94    5.04   0
   4   1   8  103.54    3.83   0
   4   2   8   83.66    3.34   0
   5  -5   2   35.96    5.54   0
   5  -3   6   -0.06    5.05   0
   5   2   9   49.00    3.73   0
   8   1  10   13.89    5.79   0
  10   2  10   -1.93    6.83   0
   5  -2   7   36.65    5.36   0
   6  -3   6   66.66    6.90   0
   7  -4   4    8.60    6.94   0
   7   2  10   26.58    5.78   0
   8  -4   3   12.04    6.96   0
   9  -1   8   83.87    7.90   0
   9   0   9   60.10    8.08   0
  10   3  10   14.38    6.15   0
  10   4  10   67.08    6.60   0
  11   2   9   24.27    6.36   0
   3  -1   6  164.01    4.85   0
   4  -3   5   58.67    4.92   0
   4  -1   7   11.28    3.91   0
   5  -4   4   12.95    6.07   0
   6  -1   8  106.72    6.75   0
   8  -2   7   65.74    8.00   0
   8   0   9   13.51    6.84   0
   8   4  10    0.42    5.05   0
   9   2  10    2.15    7.12   0
   9   4  10    4.18    6.77   0
  10  -2   5    7.48    6.35   0
  10  -1   7    0.73    6.31   0
  10   1   9    3.38    7.54   0
  11   0   7    8.59    6.45   0
   4  -2   6    6.03    4.69   0
   6  -2   7  185.03    7.68   0
   6   1   9   31.17    4.76   0
   8  -3   5   -2.58    7.24   0
   8  -1   8  105.58    8.98   0
   9  -3   4    0.27    6.84   0
   9  -2   6    4.65    7.42   0
  10   0   8   -5.43    7.06   0
  11   1   8    2.23    6.14   0
   3  -2   5    7.99    3.79   0
   5  -5   1  228.28    7.08   0
   5   0   8  130.04    5.76   0
   6   3   9    6.45    4.70   0
   8  -4   2   11.50    6.16   0
  11   4   9   10.95    5.77   0
   4  -4   3   84.37    5.46   0
   5  -3   5   -1.23    5.09   0
   6   2   9   51.58    4.88   0
   7   1   9   99.01    7.23   0
   9  -1   7   21.11    8.56   0
   9   1   9   11.46    7.53   0
  10   2   9   14.02    7.44   0
   4   0   7    4.35    2.53   0
   5  -4   3   71.70    6.28   0
   5  -2   6   15.14    5.57   0
   9  -3   3  142.27    8.27   0
   9   0   8   -7.77    7.53   0
  10  -2   4    3.66    6.84   0
  10  -1   6   18.67    7.08   0
  11   0   6   24.16    7.95   0
  11   2   8   13.53    6.97   0
   5   2   8  304.43    5.66   0
   5   3   8 1267.02    8.92   0
   6   0   8  195.60    7.09   0
   7   4   9   30.72    4.48   0
   8  -4   1   14.14    6.92   0
   8  -3   4   66.44    8.10   0
   9  -2   5    0.76    8.94   0
   9   2   9  114.98    9.60   0
  10   0   7    9.79    8.18   0
  10   1   8   21.97    8.46   0
  10   3   9   62.24    8.57   0
  10   4   9    9.78    7.66   0
   4   1   7  203.40    4.66   0
   6  -2   6  238.57    8.26   0
   7  -4   2   41.57    7.58   0
   7   0   8   89.31    8.17   0
   8  -1   7    4.24    8.97   0
   8   2   9   75.46    8.24   0
  11   3   8   13.98    7.32   0
   4  -1   6   -1.73    2.37   0
   7  -1   7  157.69    9.29   0
   8  -4   0    1.47    6.73   0
   8   3   9   59.73    8.40   0
   8   4   9    4.45    5.77   0
   9  -3   2   30.78    7.15   0
   9   3   9   -0.53    6.42   0
   9   4   9   14.08    6.42   0
  10  -2   3   39.10    7.99   0
  10  -1   5    3.17    7.95   0
  11   4   8   27.44    6.69   0
   3  -3   3  107.73    4.26   0
   4  -4   2   50.46    5.08   0
   5  -3   4   81.02    6.01   0
   5   0   7   93.25    5.41   0
   6  -4   2   13.41    8.10   0
   6   1   8   51.32    5.18   0
   8  -3   3   -6.07   10.29   0
   9  -1   6    2.91    8.72   0
   9   1   8   54.55    9.11   0
  11   2   7   -1.57    9.73   0
   3  -4   1  610.51    7.75   0
   3  -2   4    6.41    3.99   0
   5  -4   2   16.57    6.12   0
   6  -3   4   40.76    7.14   0
   6   4   8   22.57    3.16   0
   7  -4   1    5.68    7.61   0
   7   1   8  127.84    7.40   0
   8  -2   5   12.14    8.20   0
   9  -3   1   41.86    8.59   0
   9  -2   4  195.84   10.99   0
   9   0   7   -1.15    9.04   0
  10  -2   2    4.78    6.93   0
  10   0   6   26.53    8.40   0
   5  -1   6  139.89    6.18   0
   6   2   8   54.13    5.19   0
   6   3   8  267.84    7.34   0
  10   1   7   10.12    8.94   0
  10   3   8    7.86    8.11   0
  10   5   8   18.36    6.41   0
   4   0   6  259.80    5.28   0
   7  -2   5  124.53    8.76   0
   9   2   8   37.46    8.05   0
  10  -1   4   44.89    9.22   0
  10   4   8   45.31    8.30   0
  11   0   4    7.21    8.25   0
  11   3   7   29.52    9.71   0
   5   2   2  118.94    2.18   0
   5   4   0   75.62    2.44   0
   6   0   2   51.38    2.28   0
   6   4   0    3.78    2.20   0
   6   5  -3  111.48    3.45   0
   7  -2   0    4.59    3.81   0
   7   4  -9   48.60    3.49   0
   7   4  -1   11.11    3.08   0
   8   0   0  184.26    4.87   0
   8   2   0  117.18    4.28   0
   8   3  -1   68.87    4.20   0
   8   4  -6   22.27    4.85   0
   8   4  -5   74.28    4.60   0
   8   4  -4   16.76    5.01   0
   9  -1  -6   89.10    4.20   0
   9  -1  -5   -4.51    4.09   0
   9   0  -3  132.71    5.33   0
   9   2  -3  205.32    5.85   0
   5  -1   2   26.59    1.79   0
   6  -2   1   54.28    2.32   0
   6   1   2  398.38    3.57   0
   6   3   1  306.09    3.54   0
   6   5  -6    1.46    3.42   0
   6   5  -4  505.46    5.04   0
   7   2   1   67.51    3.15   0
   8  -2  -2  184.45    4.77   0
   8   1   0   49.89    4.42   0
   9   0  -7    8.24    3.85   0
   9   0  -4    0.10    4.60   0
   9   1  -7   23.43    4.10   0
   9   2  -5    4.75    4.45   0
   9   2  -4   57.42    4.83   0
   5   3   1  296.06    2.87   0
   7   0   1   55.34    3.17   0
   7   3   0  560.10    5.19   0
   7   4  -8    5.79    4.21   0
   8  -3  -5    9.35    3.65   0
   8   3  -8  117.32    4.93   0
   9   0  -6    4.19    4.04   0
   9   0  -5  175.90    4.99   0
   9   1  -6    6.63    4.18   0
   9   1  -5   20.13    4.26   0
   9   1  -4  244.18    5.80   0
   5   0   2  445.57    3.21   0
   5   1   2  430.65    3.19   0
   5   5  -5    0.27    3.18   0
   5   5  -4   21.89    2.56   0
   6   4  -1   24.79    2.46   0
   7   4  -2   87.88    4.11   0
   8  -3  -6   -3.79    3.20   0
   8  -2  -3  168.24    5.50   0
   8   2  -1    2.73    3.92   0
   7  -1   0   77.47    3.97   0
   7   4  -7   38.48    4.36   0
   8   1  -1   14.20    4.00   0
   8   2  -9  137.24    4.45   0
   8   3  -7   19.67    4.69   0
   5   4  -1  520.21    3.75   0
   6  -1   1   93.50    2.67   0
   6   3   0   84.92    2.89   0
   7   2   0   24.72    3.15   0
   7   4  -6    2.93    4.34   0
   8  -2  -4    1.53    5.09   0
   8   3  -6    6.73    5.07   0
   8   3  -5   63.50    4.88   0
   8   3  -4  128.89    4.92   0
   5  -2   1    2.88    1.37   0
   6   1   1   81.66    2.60   0
   6   4  -9  114.36    3.96   0
   6   4  -2   32.50    2.74   0
   7   0   0   -0.30    2.83   0
   7   1   0   -1.50    3.04   0
   8   2  -8    6.24    4.37   0
   5   2   1   61.36    1.95   0
   5   3   0   55.92    2.06   0
   6  -2   0   85.41    3.28   0
   6   0   1  227.33    3.05   0
   7   3  -9    2.47    3.61   0
   7   3  -2   34.86    3.70   0
   8  -2  -8    2.59    3.70   0
   8  -2  -7    6.90    4.68   0
   8  -2  -5   16.70    4.29   0
   8  -1  -3   10.04    4.57   0
   8   1  -9    5.83    3.97   0
   8   2  -7   19.51    4.62   0
   5   4  -2    1.51    2.04   0
   6   4  -8   64.10    4.21   0
   6   4  -3  195.58    3.87   0
   7  -3  -3   31.25    3.76   0
   8  -1  -9   56.53    4.01   0
   8  -1  -4    6.54    4.56   0
   8   0  -9   16.67    4.22   0
   8   0  -3   50.13    4.63   0
   8   2  -6   45.36    4.94   0
   8   2  -5   99.48    5.15   0
   8   2  -4   45.98    5.24   0
   4   4  -2  252.51    2.53   0
   6   2   0  496.86    4.18   0
   6   3  -1   39.95    2.79   0
   6   4  -7    0.87    4.31   0
   6   4  -4   72.51    4.07   0
   7  -2  -2  230.43    4.43   0
   7  -1  -1   69.02    3.88   0
   7   3  -8   12.03    4.71   0
   7   3  -3   99.36    4.23   0
   8  -1  -8    4.42    4.09   0
   8  -1  -5   22.03    4.94   0
   8   1  -8   68.53    4.39   0
   8   1  -4   -3.39    4.54   0
   5  -1   1  293.99    2.86   0
   5   1   1  668.67    3.81   0
   6   4  -5  537.30    5.47   0
   7  -3  -4   -2.46    4.60   0
   7   0  -1   43.66    3.17   0
   7   1 -11   -7.55    4.66   0
   7   1  -1   29.82    3.37   0
   7   2 -10   -3.86    4.22   0
   7   3  -7   22.72    4.40   0
   7   3  -4  285.66    5.09   0
   8  -1  -7   33.66    4.47   0
   8  -1  -6   12.77    4.84   0
   8   0  -7   52.08    4.46   0
   8   0  -5   43.91    4.89   0
   8   1  -7   20.52    4.74   0
   8   1  -6  131.52    5.45   0
   8   1  -5    3.16    4.86   0
   5   0   1   15.48    1.67   0
   5   4  -3   13.63    2.29   0
   6  -1   0  165.98    3.09   0
   6   3 -10   40.95    3.95   0
   7   2  -2  150.74    4.07   0
   8   0  -6   15.85    4.79   0
   5   3  -1  349.75    3.24   0
   6   0   0   11.79    2.25   0
   7  -3  -5    2.07    5.17   0
   7   2  -9    0.12    4.50   0
   5   4  -4  782.38    5.14   0
   6  -3  -2   86.41    3.37   0
   6  -2  -1   22.47    2.80   0
   7  -3  -9    9.58    3.83   0
   7  -1 -11   20.76    3.64   0
   7   0 -11    0.39    3.78   0
   7   1 -10   -5.35    4.28   0
   7   2  -3    2.01    3.72   0
   5  -2   0   10.66    1.88   0
   5   3 -11    0.99    3.27   0
   5   4  -7   10.40    3.31   0
   5   4  -6   11.10    3.02   0
   5   4  -5  251.34    3.97   0
   6   3  -9   37.35    4.43   0
   6   3  -3    7.21    2.75   0
   7  -3  -8  146.47    4.57   0
   7  -3  -7  222.93    5.08   0
   7  -3  -6   38.97    4.30   0
   7   2  -8    9.61    4.99   0
   7   2  -4  203.09    4.76   0
   4   4  -4   47.39    1.98   0
   5  -3  -1   11.62    2.28   0
   6   3  -8    9.57    4.02   0
   7  -2 -10   68.07    4.40   0
   7  -1  -3   12.36    3.95   0
   7   0 -10   -1.16    4.49   0
   7   1  -9   12.74    4.63   0
   7   1  -3   56.03    3.95   0
   7   2  -7    4.05    4.25   0
   7   2  -6   18.45    4.22   0
   5   1   0   17.46    1.77   0
   5   3  -2  247.07    2.98   0
   6  -1  -1  379.21    4.14   0
   6   0  -1   11.73    2.46   0
   6   1 -12   81.42    4.26   0
   6   1  -1  145.57    2.55   0
   6   2  -2   27.64    2.82   0
   6   3  -5   42.44    4.57   0
   7  -2  -9  108.30    4.73   0
   7  -2  -5   69.27    4.47   0
   7  -1 -10   19.31    4.58   0
   7   1  -4    3.07    4.02   0
   5  -1   0   82.88    2.15   0
   5   0   0  387.56    3.27   0
   5   2  -1   25.16    1.98   0
   5   3 -10   34.65    4.83   0
   6  -3  -3   70.70    3.43   0
   6  -2  -2  582.96    5.04   0
   6   2 -10   32.66    4.92   0
   6   3  -6  261.95    4.82   0
   7  -2  -8    5.69    4.44   0
   7  -2  -7    5.55    4.70   0
   7  -2  -6   56.86    4.69   0
   7  -1  -9    9.17    4.46   0
   7   0  -9    2.88    4.58   0
   7   0  -4    5.18    4.08   0
   7   1  -8   35.13    4.83   0
   7   1  -7  212.39    5.64   0
   5   3  -3   37.01    2.36   0
   6   2  -3    1.21    2.86   0
   7  -1  -8   77.62    4.95   0
   7  -1  -5    0.65    3.97   0
   7   1  -6  177.25    5.79   0
   4   3  -2    2.45    1.53   0
   6  -4 -10    3.04    3.79   0
   6  -1  -2  138.82    3.92   0
   6   0 -12    5.36    3.86   0
   6   1 -11   34.37    4.83   0
   6   1  -2  102.39    3.14   0
   6   2  -9   -0.38    4.47   0
   7  -1  -7    7.76    4.71   0
   7  -1  -6    2.41    4.94   0
   7   0  -6  110.96    5.06   0
   4   2 -13   -0.35    3.94   0
   5  -2  -1  152.48    2.53   0
   5   1 -13   14.00    4.15   0
   5   3  -9   -5.05    3.84   0
   5   3  -4   94.35    2.76   0
   6  -4  -8   44.64    4.79   0
   6  -4  -7  266.05    5.04   0
   6  -3  -4   25.47    4.21   0
   6  -2 -12  168.30    4.93   0
   6  -1 -12   21.69    4.31   0
   6   0  -2  207.26    3.54   0
   6   2  -4    8.38    3.21   0
   5   1  -1   13.57    1.80   0
   5   2 -11   42.91    5.23   0
   5   2  -2  178.09    2.83   0
   6  -3 -11    7.74    4.03   0
   6  -2  -3  172.29    3.96   0
   6   1 -10   -1.19    5.14   0
   6   2  -8   71.83    4.33   0
   6   2  -5   -0.89    4.00   0
   4   3  -3    4.94    1.53   0
   5  -1  -1   30.76    2.21   0
   5   3  -7   53.21    3.45   0
   5   3  -6  255.60    4.38   0
   5   3  -5  609.07    4.90   0
   6  -3 -10    2.44    5.19   0
   6   0 -11    0.69    4.62   0
   6   2  -6    1.21    4.21   0
   4   1 -14   37.48    3.95   0
   4   3 -10    9.70    3.42   0
   5  -5 -11    6.89    3.52   0
   5   0  -1   14.31    1.92   0
   6  -2 -11    6.68    4.42   0
   6  -1  -3  186.57    3.60   0
   6   0  -3   93.00    3.45   0
   6   1  -9   27.38    4.66   0
   6   1  -4    9.11    3.24   0
   4  -3  -1  135.83    2.03   0
   5  -5  -7    4.71    3.77   0
   5   0 -13   -0.84    4.54   0
   5   1 -12    2.03    4.71   0
   5   2 -10   51.91    4.40   0
   5   2  -3  428.97    3.79   0
   6  -3  -9   11.51    4.73   0
   6  -3  -8  191.87    5.15   0
   6  -3  -7    1.74    4.66   0
   6  -2 -10    5.08    4.64   0
   6   0 -10   55.23    4.96   0
   6   1  -8   38.18    4.77   0
   6   1  -5   43.59    3.72   0
   4   2 -12    8.70    3.94   0
   4   3  -9   53.00    3.30   0
   4   3  -4   46.04    1.95   0
   5  -5  -9  112.63    4.66   0
   5  -5  -8    1.51    4.24   0
   5  -2  -2  114.89    2.58   0
   5   1  -2  102.82    2.31   0
   6  -2  -5  226.88    4.76   0
   6  -1 -10   43.70    4.74   0
   6  -1  -4   87.18    3.58   0
   6   0  -9   29.65    4.87   0
   6   0  -4   17.17    3.16   0
   4   2  -2  624.07    3.51   0
   4   3  -8  201.50    4.61   0
   5  -4 -12   10.03    4.27   0
   5  -2 -13   -0.77    5.00   0
   5  -1 -13    2.09    4.21   0
   5   1 -11   -2.17    5.33   0
   5   2  -4   60.96    2.75   0
   6  -2  -9   24.10    4.73   0
   6  -2  -8    2.58    4.75   0
   6  -1  -9   29.97    5.05   0
   6  -1  -5    2.74    4.07   0
   6   0  -8  106.72    5.01   0
   6   0  -5  201.14    4.41   0
   4  -6 -11    5.68    3.75   0
   4   1 -13    5.92    4.06   0
   4   3  -7   12.69    2.72   0
   4   3  -6   44.93    2.70   0
   5  -4  -5  177.35    3.66   0
   5  -1  -2   80.26    2.39   0
   5   0 -12    4.67    4.54   0
   5   0  -2    3.89    2.10   0
   5   2  -8   27.58    3.82   0
   5   2  -5   18.67    2.65   0
   6  -2  -7   54.61    4.07   0
   6  -1  -6   12.40    4.07   0
   6   0  -6   17.76    3.92   0
   4  -6 -10   13.41    3.92   0
   4  -2  -1   10.59    1.46   0
   4   0 -14    2.92    4.09   0
   4   2 -11   29.56    4.24   0
   5  -4 -11    8.96    4.38   0
   5  -3 -12  223.01    5.40   0
   5   2  -7   76.89    3.66   0
   5   2  -6  160.17    3.53   0
   4  -5 -13   22.85    4.86   0
   5  -4 -10   98.63    5.15   0
   5  -3  -4  181.27    3.45   0
   5  -2  -3    3.71    2.53   0
   5  -1 -12   -2.35    4.28   0
   5   1 -10    1.16    4.32   0
   3   1 -14   -3.35    3.75   0
   3   3  -9   74.21    3.13   0
   4  -4 -14   46.80    4.27   0
   4  -4  -3  376.49    3.21   0
   4  -3  -2  256.96    2.91   0
   4   2  -3   24.13    1.79   0
   5  -4  -9  135.12    5.32   0
   5  -4  -7    9.18    3.55   0
   5   0 -11   51.47    4.78   0
   5   0  -3  242.34    3.33   0
   5   1  -4  316.90    3.67   0
   3   2 -12   44.83    3.88   0
   3   3  -8    2.50    2.86   0
   3   3  -5  195.01    2.38   0
   4  -1 -14   11.32    4.18   0
   4   1  -2   42.95    1.58   0
   5  -3 -11   -1.33    5.00   0
   5  -3  -5   39.93    3.23   0
   5  -1 -11   80.49    5.23   0
   5  -1  -3   73.49    2.52   0
   5   1  -5  211.16    3.60   0
   2   0 -16    0.31    3.77   0
   3   3  -6    0.76    1.67   0
   4  -3 -14   67.10    4.78   0
   4  -2 -14   30.70    4.83   0
   4   0 -13    5.31    4.75   0
   4   2  -9   47.08    4.28   0
   4   2  -4    1.43    1.87   0
   5  -3 -10    2.29    4.59   0
   5  -2 -11  306.25    6.20   0
   5   0  -4   37.45    2.70   0
   5   1  -8   30.06    4.03   0
   5   1  -7    6.10    3.65   0
   4  -5  -6    5.88    3.49   0
   4  -4 -13    5.89    3.97   0
   5  -3  -6    6.03    4.15   0
   5  -2 -10    4.98    4.85   0
   5  -1 -10  324.10    6.12   0
   5  -1  -4  362.08    3.93   0
   3  -1 -15    8.21    4.31   0
   3   1 -13   20.67    4.11   0
   4  -5 -11    6.12    4.28   0
   4  -2  -2  374.55    2.99   0
   4  -1 -13  100.38    5.15   0
   4   0  -2  626.49    3.40   0
   4   2  -7   88.51    3.17   0
   4   2  -6    8.05    2.29   0
   4   2  -5   32.02    2.16   0
   5  -3  -8  109.29    4.77   0
   5  -2  -5  136.00    3.44   0
   5   0  -8    7.38    3.91   0
   5   0  -5  324.75    4.06   0
   3  -6 -13   84.46    4.02   0
   4  -5 -10   19.87    4.52   0
   4  -3 -13   26.26    4.88   0
   4  -3  -3  166.70    2.47   0
   4  -2 -13  178.94    5.70   0
   4  -1  -2  324.36    2.75   0
   4   0 -12  102.32    5.23   0
   4   1  -3  211.96    2.43   0
   5  -2  -6   32.66    3.41   0
   5   0  -7   88.13    4.00   0
   5   0  -6  354.93    4.55   0
   2   1 -14   -1.40    3.74   0
   3  -4 -15    6.08    4.23   0
   3  -2 -15   46.86    4.77   0
   4  -5  -9    9.17    4.23   0
   4  -5  -8    5.39    3.62   0
   4  -4 -12   -0.20    4.38   0
   5  -1  -8   19.87    3.09   0
   5  -1  -7  200.95    4.89   0
   5  -1  -6   78.38    3.42   0
   2  -1 -16   11.46    4.68   0
   3  -5 -14    4.16    4.65   0
   3  -3 -15    2.72    4.44   0
   3   2 -10   16.29    3.36   0
   4  -4  -5    9.46    3.12   0
   4  -1 -12   37.97    4.91   0
   4   0 -11    2.77    4.11   0
   4   1  -4  131.53    2.49   0
   2  -7 -13    2.02    3.86   0
   2   0 -15    4.63    4.30   0
   3   1 -12   46.84    4.42   0
   4  -4 -11   73.13    5.25   0
   4  -3 -12   35.39    5.05   0
   4  -2 -12   19.12    5.03   0
   4  -2  -3 1330.56    5.13   0
   4   0  -3   28.28    1.76   0
   4   1  -9   16.58    3.57   0
   3  -6 -11    3.51    4.13   0
   3  -4 -14    7.88    5.35   0
   3  -1 -14   65.83    5.05   0
   3   0 -13   80.49    4.74   0
   4  -4 -10   10.50    4.83   0
   4  -3  -4   81.92    2.54   0
   4   1  -8   57.16    3.20   0
   4   1  -5  225.08    3.07   0
   2  -4 -16    0.57    5.11   0
   2  -2 -16   18.53    5.01   0
   2   2 -11  133.08    3.95   0
   3  -6 -10   38.14    3.97   0
   3  -6  -8    3.80    3.49   0
   3  -5 -13   10.15    4.43   0
   3  -2 -14    6.03    4.66   0
   3   2  -8   81.51    2.92   0
   3   2  -5   32.88    1.81   0
   4  -4  -9   83.06    4.28   0
   4  -4  -7    9.54    3.21   0
   4  -3 -11   61.56    5.10   0
   4  -2 -11   14.78    5.00   0
   4   0  -4   31.12    2.02   0
   4   1  -6  104.51    2.34   0
   2  -7 -12    2.30    3.42   0
   2  -3 -16   23.90    4.71   0
   2   1 -13  201.79    4.89   0
   3  -4  -3   14.75    1.43   0
   3   2  -7   35.49    2.22   0
   3   2  -6    8.61    1.74   0
   4  -3 -10  107.59    5.15   0
   4  -3  -5  114.10    3.06   0
   4  -2  -4  991.90    4.95   0
   4   0  -9  135.57    4.48   0
   1  -2 -17   19.66    4.43   0
   1   1 -14   83.02    4.16   0
   2  -7 -11   -3.82    4.04   0
   2  -1 -15   -1.76    4.99   0
   2   0 -14   24.81    4.80   0
   3  -5 -12   88.98    5.53   0
   3  -5  -5    1.01    2.08   0
   3  -4 -13    6.44    5.87   0
   4  -1  -4   58.28    2.30   0
   4   0  -8  574.44    5.19   0
   4   0  -5  419.75    3.69   0
   2   2 -10   46.87    2.76   0
   3   1 -10  323.62    5.05   0
   4  -3  -7    1.81    3.23   0
   4  -3  -6  102.52    3.19   0
   4  -2  -5   31.76    2.38   0
   4  -1  -9    6.91    3.83   0
   4  -1  -5   25.59    2.52   0
   4   0  -7  230.91    3.80   0
   4   0  -6   18.59    2.61   0
   0  -1 -17    0.12    4.36   0
   1  -4 -17    1.71    4.32   0
   1  -1 -16   60.94    5.48   0
   1   0 -15   48.23    4.69   0
   2  -2 -15   29.65    5.20   0
   3  -5 -11   93.56    5.04   0
   4  -2  -9   96.01    4.77   0
   4  -2  -6   12.14    2.71   0
   4  -1  -8  134.58    4.02   0
   4  -1  -6  168.30    3.28   0
   2  -4 -15    3.57    4.70   0
   2  -3 -15   67.51    5.32   0
   2   2  -9   30.81    2.50   0
   3  -4 -12    9.25    4.68   0
   3  -4  -4   23.24    1.81   0
   4  -2  -7  163.43    3.80   0
   4  -1  -7    5.06    2.16   0
   1  -7 -14   -0.90    5.05   0
   2  -5 -14   96.94    5.24   0
   2   0 -13   15.53    4.30   0
   3  -5  -7   10.39    3.57   0
   3  -3  -3   59.54    1.69   0
   3   1  -8   59.55    2.65   0
   1  -5 -16    1.93    4.98   0
   1  -2 -16   -1.83    5.04   0
   2  -6 -12    1.27    4.96   0
   2   2  -8    9.38    1.92   0
   3  -4 -11   12.77    4.91   0
   3  -3 -12   33.07    5.03   0
   3  -2 -12   -1.85    4.63   0
   3   0 -10  105.49    4.04   0
   3   1  -7  243.41    3.10   0
   3   1  -6  311.56    3.06   0
   3   1  -5   59.54    1.89   0
   1  -6 -15  124.73    5.77   0
   2  -4 -14   28.17    4.95   0
   2  -2 -14   75.34    5.40   0
   2   1 -11   42.41    3.23   0
   2   2  -7   20.31    1.67   0
   2   2  -6   83.16    1.84   0
   0  -2 -17    3.08    4.05   0
   1  -7 -13   25.24    4.62   0
   1  -4 -16    4.58    4.96   0
   1  -3 -16   23.24    5.44   0
   1  -1 -15    9.59    5.41   0
   1   0 -14   37.91    4.51   0
   1   2 -10    5.54    2.14   0
   2  -6 -11    3.32    4.57   0
   2  -5 -13   20.74    5.19   0
   2  -3 -14   -3.77    5.42   0
   3  -3  -4  525.79    3.67   0
  -1  -1 -17   -1.55    3.94   0
   0  -1 -16   -5.98    6.24   0
   0   0 -15   -6.70    4.18   0
   2  -6 -10    4.74    4.58   0
   2  -6  -7    4.90    3.39   0
   2   1 -10   28.84    3.05   0
   3  -4  -9    3.63    3.68   0
   3  -4  -8   17.30    3.90   0
   3  -4  -7  142.03    4.00   0
   3  -1 -10    1.81    3.66   0
   3   0  -4    8.67    1.03   0
   0  -5 -17   30.17    4.82   0
   0  -3 -17   15.42    4.84   0
   1  -7 -12  151.22    6.03   0
   1  -5 -15   -7.72    5.04   0
   1   1 -12  528.28    5.84   0
   2  -4 -13   26.11    5.08   0
   3  -3 -10    1.73    4.05   0
   3   0  -8  478.13    4.66   0
   3   0  -7  824.96    5.00   0
   3   0  -5  496.29    3.31   0
  -1  -3 -18   -4.97    3.96   0
   0  -8 -13    5.14    3.80   0
   0  -7 -15   22.69    4.89   0
   0  -4 -17   10.33    4.63   0
   1  -6 -14   41.42    5.64   0
   1  -2 -15   36.47    6.06   0
   1   2  -9    1.73    1.85   0
   2  -3 -13   10.55    5.07   0
   3  -3  -5  408.59    3.43   0
   3  -2  -4  602.69    3.56   0
   3  -1  -9   37.15    3.40   0
   3  -1  -4 1892.58    5.63   0
   3   0  -6  178.31    2.86   0
  -1  -4 -18   12.32    4.30   0
   1  -7 -11   97.90    4.54   0
   1  -4 -15    0.46    4.97   0
   1  -3 -15    0.76    5.28   0
   2   0 -11    5.15    3.38   0
   2   1  -9   64.76    2.81   0
   3  -3  -8    5.85    3.06   0
   3  -3  -6  216.67    3.27   0
   3  -2  -5  824.32    4.44   0
   3  -1  -5   11.31    1.84   0
  -2  -2 -18    6.90    3.51   0
   0  -8 -12  106.21    4.51   0
   0  -2 -16   -1.61    5.79   0
   1   1 -11   18.83    4.06   0
   1   2  -8    1.87    1.44   0
   2  -5 -11    9.65    4.00   0
   2   1  -8  238.65    3.11   0
   3  -2  -8  258.24    4.18   0
   3  -2  -7  129.15    3.28   0
   3  -2  -6   12.25    2.36   0
   3  -1  -7  208.76    3.33   0
  -1  -8 -15    3.13    3.61   0
  -1  -2 -17   15.05    4.59   0
   0  -5 -16   30.70    4.99   0
   0   0 -14    6.50    4.61   0
   1  -6 -13    3.38    4.78   0
   1  -5 -14   53.83    5.63   0
  -1  -1 -16   20.01    6.16   0
   0  -4 -16    3.23    6.57   0
   0  -3 -16   13.76    6.19   0
   0  -1 -15    7.05    5.10   0
   1  -2 -14   20.32    4.76   0
   2  -5  -9    3.53    4.10   0
   2  -1 -11    1.53    3.78   0
   2   1  -7  652.63    4.01   0
   2   1  -6   70.05    1.90   0
  -1  -7 -16   35.59    4.52   0
   0  -6 -15    2.36    5.20   0
   0   1 -12   21.92    3.78   0
   1  -6 -12   47.42    4.90   0
   1  -4 -14    6.84    5.40   0
   1  -3 -14   41.22    5.04   0
   1   0 -12    2.65    4.13   0
   2  -5  -8    4.06    3.01   0
   2  -5  -7   30.13    2.85   0
  -3  -2 -18   -1.72    3.40   0
  -1  -5 -17   -2.69    4.45   0
  -1  -3 -17   25.14    5.26   0
   1  -5 -13   66.45    5.08   0
   2  -4 -10    0.91    3.92   0
   2  -3 -11   13.69    4.58   0
   2  -2 -11   12.65    4.34   0
   2   0  -9 1145.71    6.40   0
  -2  -4 -18   18.72    5.47   0
  -1  -8 -14   98.45    4.97   0
  -1  -4 -17   -3.66    4.76   0
   0  -7 -13   38.92    5.79   0
   0  -2 -15    6.07    6.15   0
   1  -6 -11  101.94    4.71   0
   2   0  -8  327.09    3.56   0
  -2  -8 -16    5.56    3.87   0
  -2  -7 -17    5.63    4.49   0
  -2  -5 -18    2.21    4.34   0
   0  -6 -14    2.22    7.20   0
   0  -5 -15   26.88    6.19   0
   0  -1 -14    3.74    4.75   0
   0   0 -13    6.10    3.84   0
   1  -4 -13   -1.47    4.88   0
   1   0 -11    7.64    4.06   0
   1   1  -9   40.69    2.90   0
   2  -4  -9  178.90    4.15   0
   2  -4  -5  682.14    4.04   0
   2  -3 -10   10.85    3.71   0
   2  -2 -10   30.24    3.48   0
  -2  -2 -17   19.97    4.80   0
  -1  -8 -13   38.63    5.59   0
  -1  -6 -16   21.79    5.10   0
  -1  -2 -16   48.79    6.49   0
   0  -7 -12   45.47    5.35   0
   0  -4 -15   31.77    6.57   0
   0  -3 -15   21.74    6.05   0
   0   1 -11   13.47    2.92   0
   1  -6  -6   -0.09    2.27   0
   1  -5 -12    4.38    4.13   0
   2  -4  -8    7.15    2.90   0
   2  -4  -6   95.40    2.60   0
   2  -1  -9  194.48    3.81   0
   2   0  -7  332.04    3.29   0
   2   0  -6    5.80    1.68   0
  -2  -1 -16   10.57    4.70   0
  -1  -1 -15   49.65    5.39   0
   2  -2  -9    6.19    3.14   0
   2  -1  -8  199.23    3.33   0
  -3  -3 -18   71.03    4.96   0
  -2  -6 -17   46.85    6.08   0
  -1  -5 -16   24.86    5.82   0
  -1  -3 -16   23.01    7.17   0
   0  -7 -11   78.76    5.80   0
   0  -5 -14   11.35    5.76   0
   0  -2 -14   89.81    5.23   0
   1  -6  -8  225.62    4.09   0
   2  -3  -8  132.13    3.54   0
  -2  -8 -15    0.49    3.95   0
  -1  -4 -16    3.72    5.66   0
   0  -6 -13    9.95    5.56   0
   0   0 -12   20.73    3.36   0
   1  -3 -12    2.64    4.33   0
   1  -1 -11   12.10    3.30   0
   1   0 -10    3.24    2.60   0
   2  -3  -7   98.22    2.85   0
   2  -3  -6    7.02    2.07   0
   2  -3  -5   16.59    1.67   0
   2  -2  -8   28.37    2.80   0
   2  -1  -7    2.34    2.07   0
   2  -1  -6  231.06    2.74   0
  -3  -6 -18    2.74    4.00   0
  -3  -4 -18    1.79    4.36   0
  -2  -7 -16    9.07    4.76   0
  -2  -5 -17   65.23    5.24   0
  -2  -4 -17   17.31    5.16   0
  -1  -7 -14    5.06    5.81   0
  -1  -6 -15   19.85    5.77   0
   0  -4 -14   -0.43    6.24   0
   0  -3 -14   56.45    5.59   0
   0  -1 -13   37.16    4.37   0
   0   1 -10  276.08    3.94   0
   1  -5 -10   79.44    4.58   0
   2  -2  -7   -3.84    2.28   0
   2  -2  -6   13.40    2.09   0
   2  -2  -5  447.32    3.34   0
  -3  -5 -18    0.04    4.18   0
  -3  -2 -17   37.99    4.39   0
  -1  -8 -11    5.51    4.13   0
  -1  -2 -15   49.81    6.71   0
   0  -6 -12   80.60    6.52   0
   1  -4 -11   -1.23    4.34   0
   1   0  -9  465.44    4.81   0
  -4  -3 -18   -3.49    4.74   0
  -3  -8 -16   21.51    4.16   0
  -3  -7 -17   42.65    4.70   0
  -3  -1 -16    4.17    4.02   0
  -2  -8 -14    5.23    5.62   0
  -1  -5 -15   31.19    6.72   0
  -1   0 -13   15.00    3.78   0
   0  -7  -8  210.30    4.17   0
   0  -5 -13    3.81    4.90   0
   1  -3 -11    8.28    4.03   0
   1  -1 -10   96.49    3.50   0
  -3  -9 -14   44.08    4.52   0
  -2  -6 -16    5.23    4.90   0
  -1  -8 -10   38.62    4.48   0
  -1  -4 -15   22.98    6.98   0
  -1  -3 -15    1.99    6.39   0
  -1   1 -11    0.55    2.86   0
   0  -2 -13   58.86    5.11   0
   0   0 -11  322.83    5.64   0
   1  -5  -5   99.14    2.17   0
  -4  -8 -17    9.25    4.26   0
  -3  -3 -17   48.88    6.92   0
  -2  -7 -15    3.39    5.23   0
  -2  -3 -16  120.84    6.97   0
   0   1  -9  438.83    3.85   0
   1  -5  -7   11.38    2.66   0
   1  -2 -10  341.71    4.89   0
   1   0  -8  630.83    4.43   0
  -4  -6 -18    2.07    4.44   0
  -4  -4 -18   17.62    4.55   0
  -4  -2 -17   12.23    4.19   0
  -3  -6 -17    4.68    4.72   0
  -2  -5 -16   69.79    6.09   0
  -2  -4 -16   38.45    6.38   0
   1  -4  -9  521.53    5.81   0
   1  -1  -9 1259.34    6.79   0
  -5  -3 -18    0.34    3.87   0
  -4  -5 -18   19.57    4.92   0
  -3  -9 -13    9.62    5.10   0
  -3  -5 -17   10.23    5.04   0
  -3  -4 -17   28.24    5.46   0
  -2  -8 -13   14.48    5.28   0
  -1  -7 -12   57.55    5.88   0
  -1  -5 -14   -9.35    6.78   0
   0  -6 -10   92.83    4.93   0
   0  -2 -12   10.72    4.38   0
   1   0  -7  706.77    4.24   0
  -4  -9 -15    0.34    3.96   0
  -3  -7 -16   -2.64    5.41   0
  -3  -2 -16   46.48    5.77   0
  -1  -6 -13   23.99    6.11   0
   0  -4 -12   80.96    5.38   0
   0  -3 -12    5.34    5.04   0
   0   0 -10  465.19    4.89   0
   0   1  -8   35.54    2.12   0
   1  -4  -8   10.36    2.72   0
   1  -3  -9   14.10    3.14   0
   1  -2  -9   75.80    3.38   0
  -4  -7 -17   13.13    5.02   0
  -2  -7 -14   10.23    6.09   0
  -2  -6 -15   -7.42    5.75   0
   0  -6  -9   12.39    3.57   0
   0  -5 -11    1.59    4.46   0
   0  -1 -11  109.01    3.86   0
   1  -4  -7    4.31    2.30   0
   1  -1  -8  202.40    3.41   0
  -6  -5 -18   27.97    4.52   0
  -4  -4 -17   41.06    4.98   0
  -1  -2 -13    3.89    4.73   0
   1  -6  -9   88.79    3.81   0
   1  -5 -10   81.51    3.72   0
   1  -3 -10    9.85    3.10   0
   1  -1  -8  206.16    3.03   0
  -5  -6 -18    3.25    4.23   0
  -4  -8 -17    9.23    4.20   0
  -4  -2 -15   16.86    5.13   0
  -3  -8 -16   19.43    4.50   0
  -2   0 -11   96.66    3.52   0
  -1  -6 -14   58.13    6.35   0
  -1  -4 -14   16.16    6.58   0
  -1   0 -10  129.00    3.13   0
   0  -7 -11   61.45    5.69   0
   0  -3 -12    1.60    4.21   0
   0  -1 -10   16.34    2.88   0
   1  -4 -10   76.37    4.16   0
   1  -2  -9   79.61    3.22   0
  -5  -4 -17    1.24    4.87   0
  -4  -5 -17   25.81    5.15   0
  -3  -9 -15   42.58    4.16   0
  -3  -4 -16   15.76    5.18   0
  -2  -7 -15   -0.82    5.24   0
  -2  -4 -15   10.19    5.79   0
  -1  -5 -14   -1.30    6.21   0
   0  -2 -11    1.46    3.53   0
   0   0  -8   41.59    2.11   0
  -6  -6 -18   42.23    4.52   0
  -6  -4 -17   10.11    4.49   0
  -5  -3 -16   36.56    5.05   0
  -5  -2 -15    1.77    4.34   0
  -4  -7 -17    5.94    4.80   0
  -4  -6 -17   38.64    5.77   0
  -3  -7 -16   -0.08    5.53   0
  -3  -1 -13    0.76    3.90   0
  -1  -8 -12   22.99    4.84   0
  -1  -7 -13   33.56    6.96   0
   0  -4 -12   69.99    5.11   0
   1  -5  -9   76.30    3.65   0
   1  -1  -7  125.53    2.31   0
  -6  -3 -16   13.43    4.11   0
  -3  -6 -16   58.37    6.14   0
  -3  -5 -16    1.47    5.36   0
  -3  -3 -15  161.99    5.86   0
  -2  -6 -15   -7.65    5.59   0
  -2  -5 -15    3.65    5.57   0
  -1  -3 -13   11.29    5.15   0
  -1  -1 -11  160.88    4.17   0
   1  -4  -9  533.14    5.88   0
   1  -3  -9   13.79    2.71   0
   1  -2  -8    8.47    2.37   0
  -5  -5 -17    5.59    4.98   0
  -2  -2 -13   -3.11    4.98   0
  -1  -2 -12   56.11    4.33   0
   0  -3 -11  167.14    4.68   0
   0  -1  -9    4.90    2.49   0
  -5  -8 -17    6.03    4.56   0
  -3  -8 -15    2.07    5.23   0
   0  -2 -10   65.80    3.54   0
   1  -5  -8    6.70    2.78   0
  -7  -5 -17   -1.49    4.56   0
  -6  -5 -17    7.10    4.68   0
  -5  -7 -17   29.05    5.30   0
  -5  -6 -17   22.06    4.84   0
  -4  -8 -16   20.89    4.99   0
  -4  -3 -15   -4.83    4.67   0
  -3  -9 -14   42.64    4.45   0
  -2  -9 -12    5.59    4.73   0
  -2  -7 -14   11.06    5.52   0
  -1  -8 -11    3.68    4.78   0
   0  -4 -11   11.27    3.93   0
   1  -4  -8   15.29    2.63   0
   1  -3  -8  242.34    3.98   0
   1  -2  -7  172.82    2.79   0
  -5  -4 -16    2.64    5.43   0
  -4  -5 -16   65.99    6.14   0
  -3  -1 -12   49.49    4.30   0
  -2  -8 -13   14.79    6.22   0
  -1  -1 -10  276.59    4.22   0
   0  -7  -9   32.34    4.37   0
  -7  -4 -16    5.71    5.26   0
  -6  -8 -17    3.80    5.05   0
  -6  -6 -17   10.39    5.60   0
  -5  -9 -16   93.78    5.15   0
  -5  -3 -15    4.05    5.99   0
  -4  -9 -15    4.97    3.86   0
  -4  -7 -16    4.83    5.13   0
  -4  -6 -16    8.79    5.32   0
  -3  -7 -15    6.55    5.57   0
  -3  -5 -15    3.97    5.86   0
  -3   0 -10    8.17    2.33   0
  -2  -6 -14   24.76    5.66   0
  -2  -5 -14   19.65    6.43   0
  -2  -1 -11  216.93    4.56   0
  -1  -2 -11   -2.60    3.53   0
  -1   0  -8   67.99    2.18   0
   0  -6 -10   87.08    4.45   0
   0  -3 -10    5.05    3.42   0
   0  -1  -8   51.46    2.19   0
   1  -5  -7    6.12    2.24   0
  -7  -6 -17    6.56    4.97   0
  -6  -7 -17    3.26    4.63   0
  -6  -4 -16    6.59    4.82   0
  -6  -3 -15   37.05    5.48   0
  -3  -6 -15   46.28    6.21   0
  -2   0  -9  177.29    2.96   0
  -1  -4 -12   27.27    5.32   0
   0  -2  -9   19.10    2.61   0
   1  -4  -7    2.07    2.56   0
   1  -3  -7  209.37    3.34   0
  -5  -5 -16    3.48    5.88   0
  -4  -4 -15    3.04    5.83   0
  -4  -1 -12  161.23    4.76   0
  -3  -8 -14   -8.63    5.68   0
  -1  -8 -10   41.50    4.92   0
  -1  -5 -12  315.88    8.24   0
   0  -5 -10  105.72    4.79   0
   1  -5  -6   44.33    2.52   0
  -7  -7 -17    2.30    4.46   0
  -5  -8 -16    1.97    4.96   0
  -4  -8 -15   -0.89    5.04   0
  -3  -9 -13    6.13    4.86   0
  -2  -7 -13    8.45    6.07   0
  -2  -4 -13   74.97    5.98   0
   0  -6  -9   12.65    4.97   0
  -8  -5 -16   33.92    4.28   0
  -6  -9 -16    5.25    4.01   0
  -6  -5 -16   -6.52    5.68   0
  -5  -7 -16    0.23    5.62   0
  -5  -6 -16   92.77    6.24   0
  -4 -10 -13    0.55    3.96   0
  -4  -2 -13   16.72    4.70   0
  -2  -8 -12    1.51    5.49   0
  -1  -3 -11    4.99    4.03   0
  -1  -1  -9  134.84    3.16   0
   0  -3  -9   10.27    2.95   0
   1  -4  -6   39.71    2.47   0
   1  -3  -6   86.21    2.30   0
  -7  -5 -16    7.16    4.60   0
  -5 -10 -14   -0.38    4.79   0
  -5  -9 -15   44.06    5.35   0
  -4  -7 -15    9.28    5.73   0
  -4  -5 -15   76.20    6.32   0
  -3  -7 -14   12.22    5.51   0
  -3  -1 -11   25.74    3.61   0
  -1  -2 -10   -3.30    3.11   0
   0  -5  -9  252.49    5.75   0
   0  -2  -8   76.23    2.59   0
  -6  -8 -16   23.73    5.42   0
  -5  -2 -13   71.84    4.87   0
  -4  -6 -15    4.50    6.27   0
  -3  -6 -14   26.23    6.51   0
  -3  -3 -13   -0.94    4.91   0
  -3  -2 -12    8.51    4.06   0
  -2  -3 -12    1.76    3.30   0
  -2  -2 -11    2.58    3.83   0
  -1  -6 -11    6.03    5.73   0
  -1  -5 -11  117.49    5.59   0
  -1  -4 -11  491.38    7.30   0
   0  -4  -9  179.92    4.17   0
  -7  -4 -15    7.62    4.65   0
  -7  -3 -14    4.84    4.96   0
  -6  -7 -16    0.59    4.89   0
  -6  -6 -16   32.27    5.83   0
  -6  -4 -15    2.97    5.41   0
  -3  -9 -12   54.69    5.55   0
  -3  -8 -13    6.24    5.85   0
  -1  -7 -10   -0.67    5.20   0
   0  -6  -8   54.08    3.50   0
  -8  -6 -16   20.87    4.30   0
  -7  -6 -16    8.38    4.87   0
  -5  -8 -15   87.77    6.05   0
  -5  -5 -15   10.11    5.94   0
  -4 -10 -12    8.09    4.95   0
  -2  -4 -12  281.18    7.13   0
  -1  -3 -10  432.97    5.86   0
  -1  -1  -8  202.97    3.04   0
   0  -3  -8  134.45    3.28   0
  -7  -8 -16   39.55    5.09   0
  -7  -7 -16   24.51    5.38   0
  -6  -9 -15  116.57    6.48   0
  -4  -8 -14    1.04    6.23   0
  -3  -4 -13   22.04    5.23   0
  -2  -6 -12   52.73    5.61   0
  -2  -5 -12   42.12    5.91   0
   0  -5  -8   33.95    3.83   0
   0  -2  -7   99.82    2.51   0
  -8  -8 -16   -3.07    4.75   0
  -8  -7 -16    6.47    4.48   0
  -6 -10 -14    9.64    5.28   0
  -6  -5 -15   41.51    7.17   0
  -5  -9 -14    0.59    6.56   0
  -5  -7 -15    3.36    5.71   0
  -5  -6 -15   22.67    6.02   0
  -4  -9 -13   25.00    6.23   0
  -4  -7 -14   15.61    7.17   0
  -4  -5 -14    7.38    6.20   0
  -4  -3 -13   30.43    4.73   0
  -3  -1 -10  654.80    6.18   0
  -2  -1  -9   -0.65    2.32   0
  -1  -6 -10   29.76    5.43   0
   0  -4  -8  305.70    4.53   0
  -8  -5 -15   71.22    5.54   0
  -7  -5 -15    9.47    6.94   0
  -4  -6 -14   10.94    5.79   0
  -2  -3 -11  125.11    5.26   0
  -1  -7  -9   21.05    4.36   0
  -1  -5 -10    5.73    3.91   0
  -1  -4 -10   92.74    4.83   0
   0  -6  -7 1089.64    8.23   0
  -8  -4 -14   21.13    5.40   0
  -7  -9 -15   25.16    4.89   0
  -6  -8 -15   13.09    5.19   0
  -6  -6 -15   35.73    5.75   0
  -3  -8 -12    7.15    6.30   0
  -3  -2 -11  190.34    4.72   0
  -9  -6 -15   27.46    4.55   0
  -6  -7 -15   -1.03    5.81   0
  -6  -4 -14   51.93    5.72   0
  -6  -2 -12    0.77    4.61   0
  -5  -3 -13    8.28    4.82   0
  -4  -4 -13    3.94    5.02   0
  -2  -4 -11   19.44    4.85   0
  -1  -3  -9   69.66    3.39   0
   0  -5  -7  122.90    3.77   0
   0  -3  -7   27.16    2.35   0
  -8  -9 -15   10.49    4.52   0
  -8  -6 -15   10.43    5.18   0
  -7 -10 -14   14.11    4.93   0
  -7  -8 -15   63.05    5.92   0
  -7  -6 -15   64.05    6.08   0
  -7  -4 -14   29.63    5.37   0
  -7  -3 -13   -0.09    4.44   0
  -5  -8 -14   35.96    5.95   0
  -5  -5 -14  178.04    6.20   0
  -4  -8 -13   -0.31    5.95   0
  -3  -4 -12   63.17    4.93   0
  -2  -6 -11   25.14    5.26   0
  -2  -5 -11  177.70    6.30   0
  -1  -6  -9  320.06    6.27   0
   0  -6  -6  627.54    5.32   0
   0  -4  -7    2.53    2.02   0
  -9  -7 -15   14.51    4.73   0
  -9  -5 -14    5.73    4.92   0
  -7  -7 -15  109.85    6.75   0
  -6 -10 -13   -4.17    5.78   0
  -6  -9 -14   25.62    5.56   0
  -5 -10 -12   94.94    6.20   0
  -5  -7 -14  110.09    7.06   0
  -5  -6 -14    2.14    6.30   0
  -4  -9 -12    3.57    6.27   0
  -1  -7  -8    0.88    3.46   0
  -1  -4  -9  220.33    4.76   0
  -1  -2  -8   21.64    2.24   0
  -8  -8 -15    9.75    4.79   0
  -8  -7 -15   45.99    5.48   0
  -5  -9 -13   10.27    5.75   0
  -4  -7 -13    7.29    6.25   0
  -4  -5 -13    7.86    5.29   0
  -4  -2 -11    4.93    3.66   0
  -3  -9 -10   32.20    5.36   0
  -3  -6 -12   36.87    5.74   0
  -3  -5 -12  276.76    6.95   0
  -2  -3 -10    9.05    3.91   0
  -2  -1  -8   18.18    2.25   0
  -1  -5  -9    5.96    3.31   0
  -8  -5 -14   28.37    6.11   0
  -6  -8 -14   44.50    6.25   0
  -5  -4 -13   58.04    5.30   0
  -4 -10 -10  102.01    5.30   0
  -3  -8 -11  161.07    7.24   0
  -3  -3 -11   35.82    4.41   0
  -2  -8  -9   63.15    4.51   0
  -7  -9 -14    9.32    5.67   0
  -7  -5 -14   64.86    6.06   0
  -6  -7 -14    0.86    6.36   0
  -6  -6 -14   11.56    5.62   0
   0  -5  -6 1244.71    7.81   0
  -9  -6 -14    5.53    4.79   0
  -8  -9 -14   13.87    5.06   0
  -8  -4 -13   31.77    5.06   0
  -7 -10 -13   78.53    6.02   0
  -5  -8 -13   13.56    6.03   0
  -5  -2 -11   64.58    3.88   0
  -4  -9 -11   87.90    6.60   0
  -4  -8 -12    2.17    5.55   0
  -4  -4 -12    2.91    4.66   0
  -2  -6 -10    8.38    4.86   0
  -2  -4 -10  267.68    6.18   0
  -1  -7  -7  373.48    5.67   0
  -1  -6  -8  517.49    6.74   0
  -1  -3  -8  155.26    3.78   0
  -8  -6 -14   38.00    5.96   0
  -7  -8 -14   35.01    6.04   0
  -7  -6 -14  119.76    6.53   0
  -7  -4 -13   11.79    4.65   0
  -6 -10 -12   40.21    5.67   0
  -6  -9 -13   -1.57    6.00   0
  -6  -2 -11   14.44    3.91   0
  -5 -10 -11    7.82    5.36   0
  -5  -9 -12    5.20    5.93   0
  -5  -7 -13  220.55    8.18   0
  -3  -9  -9    4.00    5.17   0
  -3  -7 -11   34.43    5.85   0
  -3  -4 -11  127.23    5.40   0
  -2  -5 -10    5.28    4.49   0
  -9  -8 -14   64.83    6.08   0
  -9  -7 -14   13.60    5.19   0
  -8 -10 -13   33.40    4.74   0
  -8  -8 -14    7.79    5.53   0
  -7  -7 -14   29.91    6.22   0
  -6  -3 -12  104.09    5.32   0
  -4  -5 -12    9.83    4.99   0
  -4  -3 -11    1.10    4.42   0
  -4  -1  -9   66.98    3.16   0
  -3  -5 -11   26.57    4.74   0
  -2  -8  -8   -4.17    4.37   0
  -2  -7  -9  182.75    5.85   0
  -1  -5  -8  163.98    4.33   0
  -1  -4  -8  169.18    4.10   0
 -10  -6 -13   -1.19    4.43   0
  -9  -5 -13    6.94    4.79   0
  -6 -11 -10    4.01    4.46   0
  -4  -6 -12   80.39    5.92   0
  -4  -2 -10   62.92    3.80   0
  -2  -3  -9  199.51    4.78   0
  -7  -9 -13   30.05    5.60   0
  -6  -8 -13   18.52    6.53   0
  -5  -4 -12    0.11    4.66   0
  -5  -1  -9   74.43    3.42   0
  -4  -8 -11   10.31    5.31   0
  -3  -3 -10   27.87    3.90   0
  -1  -7  -6   -1.60    3.53   0
 -10  -7 -13   -3.05    4.38   0
  -8  -5 -13    3.35    5.72   0
  -7 -10 -12   -1.75    4.91   0
  -7  -5 -13   42.88    5.99   0
  -6  -7 -13   12.95    6.35   0
  -6  -6 -13   28.43    5.81   0
  -5 -10 -10  128.93    6.76   0
  -5  -8 -12    7.34    6.37   0
  -3  -2  -9   12.89    3.12   0
  -2  -6  -9   42.22    4.66   0
  -2  -4  -9    4.87    3.83   0
  -1  -6  -7   23.50    3.29   0
  -1  -3  -7  331.64    3.93   0
 -10  -8 -13   21.95    4.66   0
  -9  -9 -13   -0.84    4.83   0
  -9  -6 -13    2.63    5.34   0
  -8  -9 -13   -1.68    5.19   0
  -7  -8 -13   12.10    5.96   0
  -6 -11  -9    4.79    5.22   0
  -6  -9 -12   20.78    6.50   0
  -6  -4 -12   14.31    5.54   0
  -5  -9 -11   70.94    6.38   0
  -5  -5 -12   -0.89    5.38   0
  -5  -3 -11    5.79    4.18   0
  -4 -10  -8    7.64    4.55   0
  -2  -8  -7    3.37    4.72   0
  -2  -5  -9   23.32    4.06   0
  -9  -8 -13   91.26    6.18   0
  -8 -10 -12  114.71    6.04   0
  -8  -6 -13    4.35    5.80   0
  -7 -11 -10   14.17    4.56   0
  -7  -7 -13    2.85    6.26   0
  -7  -6 -13   -4.90    5.81   0
  -5  -2 -10    2.92    3.34   0
  -4  -7 -11   11.58    5.62   0
  -3  -8  -9    9.87    4.69   0
  -3  -4 -10  117.87    4.73   0
  -2  -7  -8  514.27    7.06   0
  -1  -5  -7 1029.24    7.63   0
  -1  -4  -7    0.39    2.60   0
  -9  -7 -13   62.18    6.12   0
  -8  -8 -13   61.24    6.19   0
  -8  -7 -13   89.75    6.84   0
  -6  -2 -10   23.63    3.07   0
  -3  -6 -10  543.45    7.77   0
  -3  -5 -10   18.96    4.23   0
 -10  -6 -12    4.43    4.53   0
  -7 -10 -11   10.20    6.00   0
  -7  -9 -12   38.56    6.42   0
  -7  -3 -11   22.71    4.64   0
  -6  -8 -12   12.47    6.45   0
  -4  -9  -9   83.56    5.85   0
  -4  -3 -10   40.92    3.51   0
  -4  -1  -8  120.74    2.95   0
  -2  -3  -8   -1.48    2.74   0
  -1  -6  -6  809.91    7.37   0
  -8  -9 -12   17.56    6.31   0
  -6 -10 -10   35.24    6.53   0
  -6  -7 -12    6.98    6.22   0
  -5  -8 -11   11.08    5.44   0
  -4  -2  -9  129.64    3.58   0
  -3  -3  -9  118.53    4.13   0
  -2  -6  -8 1071.89   11.11   0
 -10  -8 -12   30.77    6.03   0
 -10  -7 -12   29.81    4.99   0
 -10  -5 -11   16.16    5.47   0
  -9  -9 -12    6.92    5.91   0
  -8 -10 -11   27.31    5.39   0
  -8  -5 -12   -2.14    5.16   0
  -7 -11  -9   22.33    4.63   0
  -6  -9 -11   55.24    6.59   0
  -5  -9 -10    6.21    6.26   0
  -2  -8  -6  233.01    5.53   0
  -2  -4  -8    8.52    3.56   0
  -9  -6 -12   38.68    6.86   0
  -5  -5 -11    6.23    4.88   0
  -5  -1  -8   30.19    2.83   0
  -4  -7 -10  364.89    8.35   0
  -4  -4 -10   -3.11    3.96   0
  -3  -2  -8  271.90    4.25   0
  -2  -7  -7    6.12    3.96   0
  -2  -5  -8  792.30    7.73   0
  -9  -8 -12    7.78    5.81   0
  -9  -7 -12  243.94    7.56   0
  -8  -8 -12  124.49    7.29   0
  -8  -6 -12   57.04    6.88   0
  -7  -7 -12   73.43    6.99   0
  -7  -6 -12    7.59    5.97   0
  -6  -4 -11   -4.02    4.36   0
  -5 -10  -8    0.26    6.36   0
  -5  -6 -11   23.25    5.42   0
  -5  -3 -10   14.24    3.48   0
  -3  -4  -9   51.23    3.79   0
 -10  -9 -11   20.14    5.60   0
  -8  -7 -12   10.60    6.25   0
  -8  -3 -10    4.54    3.94   0
  -7 -10 -10   -0.37    6.28   0
  -7  -9 -11    5.02    6.25   0
  -7  -4 -11    6.24    4.51   0
  -6 -10  -9    7.88    7.69   0
  -6  -8 -11  104.19    7.64   0
  -4  -8  -9   20.00    5.98   0
  -4  -6 -10   10.04    4.47   0
  -4  -5 -10    1.58    4.27   0
  -3  -5  -9  608.56    7.16   0
 -11  -6 -10   27.25    4.81   0
 -10  -6 -11   20.19    6.00   0
  -8  -9 -11   53.84    6.43   0
  -6  -9 -10   32.89    6.62   0
  -6  -5 -11   -2.82    4.99   0
  -6  -3 -10    1.57    3.75   0
  -5  -9  -9   73.76    6.81   0
  -1  -6  -5   29.80    2.73   0
 -10  -8 -11    1.17    5.16   0
 -10  -7 -11   97.56    6.40   0
  -9 -10 -10    8.30    5.78   0
  -8 -10 -10   62.68    6.36   0
  -4  -3  -9  176.94    4.04   0
  -3  -7  -8   69.99    4.91   0
  -2  -6  -7 1360.86   10.11   0
  -2  -3  -7    9.88    1.92   0
 -11  -7 -10    2.96    4.58   0
  -9  -4 -10    5.61    5.60   0
  -8 -11  -8   -6.06    4.98   0
  -8  -5 -11  112.32    6.02   0
  -3  -3  -8  254.49    4.45   0
 -10  -5 -10    3.08    5.09   0
  -9  -8 -11   46.16    6.43   0
  -9  -7 -11    6.51    8.09   0
  -8  -8 -11   53.64    7.05   0
  -7 -11  -7   75.98    6.09   0
  -7 -10  -9   53.77    6.85   0
  -7  -9 -10    8.05    6.61   0
  -7  -7 -11   72.13    7.51   0
  -6 -10  -8   11.11    8.01   0
  -5  -5 -10    2.88    4.34   0
  -4  -7  -9  164.56    5.79   0
  -4  -2  -8   92.46    2.78   0
  -2  -5  -7  665.73    6.70   0
  -2  -4  -7  804.73    6.94   0
 -10  -9 -10   93.36    6.75   0
  -8  -7 -11  155.27    7.06   0
  -8  -6 -11    2.18    6.42   0
  -6  -8 -10   88.27    6.48   0
  -4  -8  -8   13.88    5.43   0
  -4  -4  -9   52.03    3.77   0
  -3  -6  -8   80.27    4.12   0
  -3  -4  -8  163.24    4.06   0
 -10  -6 -10   33.02    6.72   0
  -9 -10  -9   57.36    5.78   0
  -8 -11  -7    5.70    5.38   0
  -8  -9 -10   28.68    6.47   0
  -6  -9  -9   89.36    6.72   0
  -5  -9  -8   73.36    6.16   0
  -5  -3  -9  529.91    5.79   0
  -4  -5  -9  109.82    4.71   0
  -3  -5  -8  398.26    6.36   0
  -1  -6  -4    1.42    2.56   0
 -11  -8  -9   -3.10    5.49   0
 -11  -6  -9    1.96    4.46   0
 -10  -8 -10   11.86    5.83   0
 -10  -7 -10   19.32    7.82   0
  -9  -5 -10   66.01    6.52   0
  -7 -11  -6    8.71    4.94   0
  -6  -5 -10    1.02    4.82   0
  -5 -10  -6   94.56    6.50   0
  -3  -8  -6    4.46    4.30   0
  -3  -7  -7   33.71    4.57   0
  -2  -6  -6  191.26    4.37   0
 -11  -7  -9    9.99    5.51   0
  -7 -10  -8   66.50    7.15   0
  -7  -8 -10   70.13    7.48   0
  -6 -10  -7   18.33    7.55   0
  -6  -6 -10   13.20    5.33   0
  -6  -3  -9   10.83    3.57   0
  -5  -2  -8  220.82    3.81   0
  -2  -7  -5  675.85    6.77   0
 -10  -9  -9   36.10    6.14   0
 -10  -5  -9    7.38    5.96   0
  -9  -8 -10    4.71    6.28   0
  -9  -6 -10    3.35    5.95   0
  -8 -11  -6    3.26    4.84   0
  -8  -8 -10  -10.97    6.76   0
  -7  -9  -9   29.05    6.67   0
  -7  -5 -10   43.58    5.26   0
  -7  -3  -9  205.76    5.48   0
  -7  -2  -8   37.52    3.07   0
  -5  -4  -9    0.57    3.66   0
  -4  -7  -8   12.86    4.24   0
  -4  -3  -8  417.88    5.09   0
  -9 -10  -8   58.65    6.11   0
  -9  -9  -9    9.26    6.15   0
  -9  -7 -10   66.51    6.83   0
  -9  -4  -9   18.35    5.14   0
  -8 -10  -8    5.90    6.36   0
  -8  -9  -9   85.74    7.34   0
  -8  -7 -10   48.40    6.27   0
  -8  -6 -10   74.06    6.10   0
  -7  -6 -10   20.94    6.19   0
  -6  -9  -8   66.08    6.73   0
  -5 -10  -5   31.14    6.13   0
  -5  -6  -9   17.50    4.69   0
  -4  -8  -7    9.27    5.65   0
  -3  -3  -7  227.54    3.78   0
  -2  -5  -6  682.59    6.28   0
 -10  -8  -9   46.74    6.39   0
  -5  -8  -8   -4.33    5.18   0
  -5  -5  -9   52.32    4.51   0
  -4  -6  -8  350.11    6.31   0
  -3  -6  -7   15.15    3.25   0
  -2  -4  -6   -2.87    2.61   0
 -11  -8  -8   70.96    5.89   0
 -11  -7  -8   16.70    6.03   0
 -11  -6  -8   33.04    5.06   0
 -10  -7  -9    6.16    6.56   0
 -10  -6  -9   15.58    6.11   0
  -8  -4  -9    0.07    5.03   0
  -7 -11  -4  116.16    5.90   0
  -7 -10  -7   53.98    7.42   0
  -7  -8  -9   22.16    7.27   0
  -6  -4  -9  174.51    4.77   0
  -4  -5  -8  232.81    5.04   0
  -4  -4  -8   22.47    3.26   0
  -4  -2  -7  247.22    3.74   0
  -3  -8  -5  466.78    6.76   0
  -3  -5  -7   13.53    3.18   0
  -3  -4  -7   43.27    2.85   0
 -10  -9  -8    5.00    6.17   0
  -9 -10  -7    7.18    5.58   0
  -9  -8  -9    1.91    6.68   0
  -9  -5  -9    1.08    5.22   0
  -8 -10  -7   26.77    6.89   0
  -8  -8  -9   24.17    6.93   0
  -7  -4  -9   30.09    5.09   0
  -5  -3  -8 1239.50    8.09   0
  -3  -7  -6   -0.11    3.69   0
  -2  -6  -5   33.28    3.57   0
  -9  -9  -8   42.65    6.66   0
  -8  -3  -8    1.62    4.46   0
  -6  -5  -9   84.33    5.02   0
  -5 -10  -4    8.82    5.31   0
  -5  -7  -8   13.40    4.91   0
  -2  -7  -4  160.20    4.02   0
 -11  -8  -7   41.31    6.74   0
 -10  -8  -8   56.40    7.54   0
 -10  -5  -8   19.80    5.51   0
  -9  -7  -9   -2.40    6.10   0
  -9  -6  -9   61.09    6.63   0
  -8  -9  -8  146.54    7.99   0
  -8  -7  -9   13.72    6.25   0
  -8  -5  -9  115.75    6.26   0
  -7 -10  -6    9.94    6.74   0
  -7  -5  -9   74.23    5.50   0
  -6  -9  -7   15.24    6.32   0
  -6  -3  -8  371.43    5.43   0
  -4  -8  -6  160.65    5.63   0
 -11  -6  -7   18.95    6.01   0
 -10  -9  -7    7.23    6.47   0
  -9 -10  -6   15.09    5.48   0
  -7  -6  -9    9.34    6.18   0
  -5  -8  -7   21.00    5.23   0
  -5  -4  -8  304.79    5.43   0
  -5  -2  -7  449.27    4.60   0
 -11  -7  -7   36.22    5.23   0
 -10  -7  -8   45.34    6.48   0
 -10  -6  -8   60.46    7.37   0
 -10  -4  -7    0.57    4.53   0
  -8 -10  -6   -1.74    6.61   0
  -7  -9  -7  118.30    7.74   0
  -7  -8  -8   67.62    7.09   0
  -7  -2  -7  217.30    4.26   0
  -5  -5  -8  174.55    5.17   0
  -4  -6  -7   48.18    4.27   0
  -4  -3  -7  359.64    4.42   0
  -3  -8  -4   69.28    4.21   0
  -3  -6  -6    0.45    3.07   0
  -9  -9  -7   98.28    7.61   0
  -9  -8  -8   19.38    6.74   0
  -8  -8  -8   25.85    6.51   0
  -7 -10  -5    3.91    8.21   0
  -6  -2  -7  235.93    4.04   0
  -3  -7  -5   54.78    3.80   0
 -11  -8  -6   11.22    5.49   0
 -10  -8  -7   -0.86    6.49   0
  -9 -10  -5   49.04    6.13   0
  -9  -7  -8   -0.27    6.57   0
  -9  -5  -8   -1.17    5.91   0
  -8  -9  -7    8.99    6.74   0
  -6 -10  -4   80.21    6.49   0
  -6  -9  -6   -3.56    5.69   0
  -6  -4  -8   18.63    3.60   0
  -4  -5  -7   53.30    3.60   0
  -4  -4  -7  377.78    5.14   0
  -3  -5  -6   18.37    2.94   0
  -2  -7  -3   44.38    3.07   0
 -11  -7  -6   11.13    6.55   0
 -10  -9  -6   -0.25    5.79   0
 -10  -5  -7   22.80    7.08   0
  -9  -6  -8   -8.77    6.65   0
  -8 -10  -5   29.44    7.12   0
  -8  -7  -8   -0.32    7.40   0
  -7  -4  -8   46.78    4.70   0
  -6  -6  -8  182.00    5.85   0
  -6  -5  -8    4.38    4.40   0
  -5  -7  -7   -1.45    4.59   0
  -4  -9  -3   16.43    5.62   0
  -4  -8  -5   79.35    4.99   0
  -4  -7  -6  121.66    4.85   0
  -3  -4  -6  166.53    3.76   0
  -2  -6  -4  283.58    4.56   0
 -11  -6  -6    5.99    5.71   0
 -10  -7  -7    8.76    6.79   0
  -8  -5  -8   37.00    5.75   0
  -8  -3  -7  122.38    5.06   0
  -7  -6  -8   34.90    5.86   0
  -7  -5  -8   20.95    4.66   0
  -5  -8  -6    4.67    5.01   0
  -5  -3  -7    0.74    2.73   0
  -3  -8  -3   44.41    4.92   0
 -11  -8  -5  187.35    7.65   0
 -10  -6  -7  161.86    7.97   0
 -10  -4  -6   30.30    6.35   0
  -9 -10  -4  116.83    6.90   0
  -9  -9  -6    0.19    6.57   0
  -9  -8  -7   17.90    7.27   0
  -8 -10  -4   19.71    8.03   0
  -8  -9  -6   19.46    7.15   0
  -8  -8  -7  115.81    8.55   0
  -6 -10  -3   11.12    5.73   0
 -11  -5  -5   -0.34    4.72   0
 -10  -9  -5    2.89    5.62   0
 -10  -8  -6   22.45    6.39   0
  -7  -3  -7   85.38    4.22   0
  -6  -7  -7   13.92    5.42   0
  -6  -3  -7  224.71    4.64   0
  -5  -4  -7   86.09    3.88   0
 -11  -7  -5    4.81    6.34   0
 -11  -6  -5   11.66    6.60   0
  -9 -10  -3   35.13    5.86   0
  -9  -7  -7   55.26    7.31   0
  -7 -10  -3  254.82    8.14   0
  -6 -10  -2  137.54    7.01   0
  -6  -8  -6   87.83    6.95   0
  -5  -5  -7    5.71    3.69   0
  -4  -6  -6  319.33    5.85   0
  -3  -7  -4  399.81    6.37   0
 -11  -8  -4   91.92    7.04   0
 -10  -9  -4    0.10    6.02   0
 -10  -7  -6    7.88    7.25   0
 -10  -5  -6   95.48    7.12   0
  -9 -10  -2   32.69    6.84   0
  -9  -9  -5    6.43    6.25   0
  -9  -6  -7   13.80    6.53   0
  -8 -10  -3   37.08    6.41   0
  -8  -4  -7    4.01    4.53   0
  -7  -9  -5    1.91    6.92   0
  -7  -2  -6  176.95    4.96   0
  -6  -6  -7    5.26    4.67   0
  -5  -8  -5   15.66    5.34   0
  -5  -7  -6   96.79    5.22   0
  -5  -2  -6   22.00    2.55   0
  -4  -3  -6    4.76    2.41   0
  -2  -7  -2    2.58    2.04   0
 -10  -8  -5   17.86    6.33   0
 -10  -6  -6   -9.46    6.88   0
  -9  -8  -6   51.40    7.67   0
  -8  -9  -5   53.07    7.26   0
  -7 -10  -2   72.57    7.74   0
  -7  -4  -7   31.42    4.15   0
  -6 -10  -1  219.08    6.97   0
  -6  -5  -7  543.05    7.34   0
  -6  -4  -7   87.45    4.06   0
  -6  -2  -6    5.40    2.61   0
  -4  -7  -5    4.62    3.77   0
  -4  -5  -6  216.65    4.82   0
  -4  -4  -6    2.39    2.51   0
  -3  -8  -2   21.04    3.42   0
  -3  -5  -5  162.83    3.54   0
  -2  -6  -3  143.04    4.25   0
 -11  -8  -3   -5.49    5.15   0
 -11  -7  -4  142.94    7.58   0
 -11  -5  -4   40.48    5.75   0
 -10  -9  -3   18.04    6.02   0
  -8 -10  -2  119.38    6.72   0
  -8  -6  -7    7.23    6.45   0
  -8  -5  -7    9.42    5.88   0
  -7  -6  -7  124.47    6.38   0
  -7  -5  -7   80.19    5.16   0
  -6  -9  -4   16.29    6.53   0
 -11  -6  -4    8.28    5.98   0
 -10  -4  -5   44.84    5.48   0
  -9  -9  -4  250.69    8.54   0
  -9  -7  -6   88.91    8.13   0
  -8  -3  -6   77.27    4.56   0
  -7 -10  -1   20.38    5.51   0
  -5  -6  -6   -3.65    4.02   0
 -10  -8  -4    5.11    6.16   0
 -10  -7  -5   45.27    7.74   0
  -9  -8  -5   24.82    7.49   0
  -8 -10   0   17.38    6.18   0
  -8  -9  -4   11.60    6.90   0
  -7  -9  -4    8.92    7.34   0
  -5  -3  -6   48.80    3.04   0
  -4  -8  -3    3.73    4.93   0
  -3  -7  -3   99.79    4.69   0
 -10  -6  -5   32.60    6.85   0
 -10  -5  -5   49.15    6.75   0
  -9  -9  -3  105.73    7.71   0
  -9  -6  -6   76.16    6.25   0
  -9  -3  -5   67.23    5.25   0
  -8  -8  -5   77.58    7.65   0
  -7 -10   1    8.17    5.55   0
  -7  -7  -6   17.99    6.05   0
  -7  -3  -6   48.93    4.11   0
  -5  -8  -4  157.37    7.01   0
  -5  -7  -5    5.13    4.33   0
  -5  -5  -6   44.70    3.79   0
  -4  -6  -5   68.52    3.91   0
  -3  -6  -4   13.63    2.72   0
 -11  -6  -3   61.57    6.50   0
 -11  -5  -3    8.44    5.43   0
  -8  -4  -6   14.70    5.56   0
  -6  -3  -6   56.56    3.55   0
  -5  -4  -6   38.08    3.50   0
  -4  -7  -4   73.89    4.65   0
  -5 -11 -11  128.48    5.27   0
  -4  -5 -10    5.61    3.02   0
  -2  -9 -11   -9.77    6.22   0
   0 -11  -7   16.26    5.65   0
   0  -9  -9   88.46    7.68   0
   1  -5  -8    8.99    4.50   0
   2  -6  -7    6.09    6.14   0
   3  -5  -5   -0.91    3.73   0
  -6  -8 -11  100.48    4.88   0
  -5  -7 -11   41.23    3.97   0
  -3 -10 -11   26.83    6.05   0
  -3  -5 -10   17.41    3.38   0
  -3  -4  -9   65.42    2.60   0
  -2  -4  -9    7.35    2.68   0
   0  -4  -8  370.25    5.08   0
   1  -8  -8   36.82    6.97   0
   2  -4  -6   96.85    3.96   0
   3  -6  -5   51.40    5.42   0
  -4 -10 -11   28.41    5.64   0
  -4  -7 -11    7.33    4.45   0
  -3  -9 -11    6.49    5.33   0
  -3  -7 -11   27.71    4.80   0
  -1  -8 -10   39.54    6.69   0
   0 -10  -8   -2.34    5.42   0
   0  -8  -9   -1.14    5.96   0
   0  -6  -9   14.49    4.79   0
   1  -4  -7    5.54    3.46   0
   2  -8  -6   40.14    7.05   0
  -5 -10 -11    4.91    4.98   0
  -2 -11  -9   -1.06    5.00   0
  -2 -10 -10    3.91    5.48   0
  -2  -6 -10    7.70    4.06   0
  -1 -11  -8    2.01    4.57   0
  -1 -10  -9   17.80    6.01   0
  -1  -5  -9    0.85    3.37   0
   1  -9  -7   45.68    6.70   0
   1  -3  -6   73.20    3.14   0
   2  -9  -5    7.09    4.92   0
   3  -4  -4   18.78    2.46   0
  -6 -11 -10    6.34    4.47   0
  -4  -8 -11   12.56    5.02   0
   0 -11  -6   -1.98    4.48   0
   2  -5  -6    3.67    3.85   0
  -5 -11 -10   30.57    4.23   0
  -4 -11 -10   -0.88    4.34   0
  -4  -6 -10    6.67    4.14   0
  -2  -9 -10    5.65    5.46   0
  -2  -7 -10    1.29    4.56   0
  -1  -4  -8  235.40    3.66   0
  -1  -3  -7  288.21    3.21   0
   0  -9  -8   29.84    5.28   0
   0  -5  -8   43.65    3.56   0
   2  -6  -6  146.30    6.38   0
  -3 -10 -10    2.37    4.77   0
  -2  -5  -9   19.75    2.82   0
  -1  -9  -9    9.90    5.47   0
   0 -10  -7    1.70    5.15   0
   1  -8  -7   10.05    4.81   0
   1  -5  -7    8.94    3.47   0
  -6 -10 -10   10.86    4.01   0
  -4  -5  -9   89.29    2.60   0
  -4  -4  -8   14.54    1.78   0
  -3 -11  -9   53.94    4.98   0
  -2 -10  -9   30.09    5.87   0
  -1 -11  -7   10.88    4.15   0
   1  -6  -7   28.25    3.73   0
   2  -9  -4    6.67    4.72   0
   2  -4  -5  494.87    4.96   0
  -6  -9 -10   34.27    4.34   0
  -5 -10 -10  125.51    5.64   0
  -5  -7 -10   46.56    4.06   0
  -4 -10 -10   79.69    5.59   0
  -3  -9 -10   33.90    5.20   0
  -3  -7 -10    2.97    3.88   0
  -3  -5  -9  462.98    4.00   0
  -2 -11  -8   13.99    4.77   0
  -2  -4  -8   -0.28    2.22   0
  -1 -10  -8   56.55    5.27   0
   0 -11  -5    4.53    4.23   0
   0  -7  -8  191.16    5.61   0
   0  -6  -8   54.05    3.87   0
   0  -4  -7    6.99    2.43   0
   1  -4  -6   47.61    2.94   0
   3  -4  -3   14.12    2.53   0
  -4 -12  -8   60.05    4.16   0
  -4 -11  -9    1.85    4.53   0
  -3  -4  -8  132.41    2.43   0
   2  -7  -5   28.89    5.45   0
  -6 -11  -9    8.16    3.75   0
  -5 -11  -9   11.08    4.16   0
  -5  -9 -10    7.13    4.40   0
  -3 -12  -7  116.90    4.44   0
  -2  -9  -9  106.06    5.63   0
  -2  -6  -9   47.49    3.41   0
  -1  -5  -8  212.71    3.66   0
   0 -10  -6   13.89    4.86   0
   0  -9  -7   -1.41    4.79   0
   2  -9  -3    2.24    5.39   0
   2  -5  -5   23.42    3.56   0
   3  -6  -3    3.16    3.62   0
   3  -5  -3    0.97    3.01   0
  -3 -10  -9   27.04    5.07   0
  -1 -11  -6   80.73    5.03   0
  -1  -9  -8   10.12    5.13   0
   0 -11  -4   33.38    4.71   0
   2  -8  -4   -0.72    4.72   0
  -5  -5  -8   80.69    2.87   0
  -4  -6  -9  529.77    4.83   0
  -3 -11  -8    3.41    4.21   0
  -2 -10  -8   31.03    5.17   0
  -1 -10  -7   18.60    4.69   0
  -1  -4  -7    0.87    2.07   0
   0  -5  -7  135.24    3.37   0
   1  -5  -6   42.03    3.06   0
  -6 -10  -9    4.31    4.15   0
  -4 -12  -7   17.10    4.08   0
  -4 -10  -9   -0.49    4.96   0
  -3  -9  -9    8.06    4.43   0
  -2  -5  -8  851.59    5.27   0
  -1  -7  -8    2.59    3.83   0
  -1  -6  -8  432.74    4.20   0
   1  -7  -6   37.07    4.73   0
   1  -6  -6   -1.64    3.12   0
   2  -4  -4   23.29    2.26   0
  -6 -11  -8   27.62    4.54   0
  -6  -9  -9   89.46    4.22   0
  -5 -12  -7  106.79    4.28   0
  -5 -10  -9   40.51    4.82   0
  -4 -11  -8   -0.75    4.65   0
  -3 -12  -6   73.24    4.11   0
  -3  -7  -9    6.99    3.37   0
   0 -11  -3   32.33    4.82   0
   0 -10  -5    1.12    4.84   0
   0  -7  -7   41.83    4.31   0
   0  -6  -7 1225.05    7.20   0
   1 -10  -3   46.37    4.62   0
   2  -9  -2   11.01    4.51   0
   2  -7  -4   -2.66    4.45   0
   3  -4  -2   13.85    2.42   0
  -5 -11  -8   10.61    4.49   0
  -5  -9  -9   55.25    5.32   0
  -4  -9  -9   77.40    4.56   0
  -4  -5  -8  150.37    2.54   0
  -3  -5  -8  327.16    3.42   0
  -2  -9  -8   17.75    5.32   0
  -2  -4  -7  811.89    4.31   0
  -1 -11  -5    8.50    4.34   0
   0  -9  -6   16.63    4.69   0
   0  -4  -6  182.10    2.79   0
   1  -4  -5   23.26    2.45   0
   2  -5  -4  189.30    4.74   0
  -5  -8  -9    0.99    3.93   0
  -4 -12  -6   59.87    4.61   0
  -4  -8  -9   19.37    4.59   0
  -3 -10  -8   48.00    5.21   0
  -2 -11  -6   -1.25    4.25   0
  -2  -6  -8 1640.12    7.96   0
  -1 -10  -6   30.26    4.88   0
  -1  -9  -7   71.68    5.22   0
   2  -8  -3   12.81    4.54   0
  -3 -12  -5   11.44    3.88   0
  -3  -4  -7   30.65    1.75   0
  -2 -10  -7   -4.77    5.15   0
  -2  -8  -8    0.75    4.12   0
  -1  -5  -7  995.08    5.47   0
   0 -11  -2    7.76    3.44   0
   1 -10  -2   16.34    4.32   0
   2  -9  -1   11.86    3.97   0
  -6 -10  -8   17.79    4.09   0
  -5 -12  -6   34.90    3.87   0
  -5  -6  -8    0.37    2.78   0
  -4 -11  -7    5.54    4.68   0
  -4 -10  -8    7.53    4.39   0
  -3  -9  -8   19.40    4.82   0
  -1 -11  -4   18.18    4.53   0
  -1  -8  -7   -0.30    4.16   0
   0 -10  -4    9.76    5.37   0
   0  -5  -6 1389.74    6.67   0
   1  -7  -5   88.61    4.92   0
   1  -5  -5   88.18    3.04   0
  -6 -11  -7    1.67    4.04   0
  -6  -7  -8    2.21    2.68   0
  -5 -11  -7   96.68    6.39   0
  -5 -10  -8    5.79    4.39   0
  -3  -6  -8   62.22    2.74   0
  -1  -7  -7  356.76    5.26   0
  -1  -6  -7   34.36    3.20   0
   0 -11  -1    2.73    4.53   0
   0  -7  -6    4.06    3.66   0
   1  -6  -5  118.24    3.93   0
  -7 -10  -7   62.72    4.50   0
  -6  -9  -8   61.94    4.12   0
  -6  -8  -8    5.30    3.73   0
  -4 -12  -5   96.52    4.67   0
  -4  -9  -8   13.43    4.59   0
  -3 -12  -4   12.63    3.84   0
  -3 -11  -6   71.20    5.09   0
  -3 -10  -7   33.16    5.30   0
  -3  -8  -8   42.92    4.17   0
  -3  -7  -8   70.07    3.46   0
  -2 -11  -5   24.09    4.50   0
  -2  -9  -7   64.84    5.79   0
  -2  -5  -7  839.80    4.96   0
  -1  -9  -6   17.68    4.66   0
  -1  -4  -6   16.33    1.95   0
   0  -6  -6  642.55    5.64   0
   1 -10  -1   -0.25    4.28   0
   1  -9  -3   22.00    5.18   0
   2  -4  -3  404.74    4.22   0
  -7 -11  -6    4.13    3.29   0
  -5 -12  -5    3.44    4.01   0
  -5  -9  -8   75.69    4.78   0
  -5  -7  -8   10.71    3.35   0
  -5  -5  -7    2.14    1.90   0
  -2 -10  -6    5.83    5.03   0
  -1 -11  -3    8.81    4.19   0
   2  -6  -3    3.50    3.47   0
   2  -5  -3    0.16    3.41   0
   3  -5  -1  308.40    4.86   0
   3  -4  -1   57.85    2.20   0
  -5  -8  -8   -2.13    3.84   0
  -4 -11  -6   30.83    4.92   0
  -4  -7  -8   15.33    3.42   0
  -2  -8  -7    2.12    4.15   0
   0 -10  -3    8.78    5.39   0
   0  -4  -5  796.73    4.64   0
   1 -10   0   35.59    4.64   0
   1  -4  -4    2.12    2.20   0
  -6 -11  -6   18.81    4.26   0
  -6 -10  -7   20.51    4.78   0
  -4 -12  -4    5.04    3.79   0
  -4 -10  -7   -0.23    5.00   0
  -4  -5  -7   48.52    2.07   0
  -3 -12  -3    6.12    4.06   0
  -3  -5  -7   10.46    1.96   0
  -2 -11  -4    6.70    4.85   0
  -2  -7  -7    8.75    3.42   0
  -2  -6  -7 1344.93    7.20   0
  -1  -8  -6    6.38    4.76   0
   0  -9  -4   10.42    5.26   0
   0  -8  -5   10.01    4.41   0
  -5 -12  -4    9.05    3.77   0
  -5 -11  -6  129.98    5.73   0
  -5 -10  -7   24.90    4.84   0
  -3 -11  -5  149.93    6.03   0
  -1 -11  -2    9.32    4.72   0
  -1 -10  -4   15.82    4.88   0
  -1  -5  -6   54.02    2.51   0
   1 -10   1    0.44    5.03   0
   1  -9  -2    1.18    4.91   0
   1  -6  -4  175.79    4.90   0
   1  -5  -4   11.17    2.59   0
   2  -7  -2    8.18    4.62   0
  -7 -11  -5   22.17    3.70   0
  -7 -10  -6    2.96    4.89   0
  -4 -12  -3    4.44    4.57   0
  -3 -10  -6    4.26    5.26   0
  -2 -10  -5    0.54    5.40   0
  -1  -6  -6 1066.93    6.67   0
   0 -10  -2   -2.82    5.61   0
   0  -7  -5   11.60    3.67   0
   0  -5  -5  163.12    3.34   0
   3  -6   0    3.43    2.74   0
  -6  -9  -7    8.73    4.45   0
  -6  -7  -7   16.88    3.02   0
  -5  -6  -7   13.82    2.37   0
  -4 -11  -5   -2.09    5.10   0
  -3  -8  -7    9.09    4.35   0
  -3  -7  -7   39.22    3.55   0
  -3  -6  -7    9.72    2.57   0
   0  -6  -5   37.39    3.46   0
   2  -6  -2   26.69    4.53   0
  -6 -11  -5    6.62    4.61   0
  -5 -11  -5   21.45    5.24   0
  -4 -10  -6   -0.09    5.32   0
  -4  -6  -7   55.82    2.86   0
  -3 -11  -4    8.90    5.21   0
  -2 -11  -3   23.88    5.33   0
  -1 -11  -1   -3.31    4.99   0
   0  -9  -3   69.77    5.43   0
   1  -9  -1    2.22    5.22   0
   2  -8   0   40.27    4.96   0
   2  -4  -2  258.98    4.17   0
  -7 -11  -4   99.59    5.56   0
  -7  -9  -6   73.97    4.49   0
  -6 -10  -6   15.92    5.31   0
  -5  -8  -7    8.83    4.02   0
  -5  -7  -7    0.07    3.02   0
  -4  -7  -7  294.86    4.76   0
  -2  -8  -6  214.32    5.81   0
  -2  -5  -6  759.96    5.05   0
  -1 -10  -3   22.02    5.80   0
   0 -10  -1    4.10    5.85   0
   1  -7  -3   18.11    4.50   0
   2  -7  -1    3.14    4.61   0
   2  -5  -2   44.23    3.26   0
  -3 -10  -5   69.58    5.58   0
  -2  -7  -6    6.96    3.59   0
  -1 -11   0    2.27    4.68   0
  -7 -10  -5   -2.14    4.40   0
  -4 -11  -4   61.01    5.60   0
  -3 -11  -3   -9.41    5.39   0
  -2  -6  -6  223.95    4.13   0
  -1 -11   1   11.72    5.79   0
   0  -7  -4   15.26    3.94   0
   1  -9   0   36.29    6.23   0
   1  -6  -3    2.40    3.28   0
   2  -8   1   21.79    5.93   0
  -7 -11  -3    4.67    4.87   0
  -6 -11  -4   34.66    5.20   0
  -6  -9  -6    1.26    4.89   0
  -4 -10  -5    5.55    5.80   0
  -3  -8  -6    1.12    4.79   0
  -3  -5  -6   15.62    2.20   0
  -1 -10  -2   86.28    6.40   0
  -1  -7  -5   72.16    4.36   0
  -1  -5  -5  382.57    4.06   0
   0 -10   0   47.90    6.29   0
   0  -9  -2    8.97    5.89   0
   1  -5  -3  416.76    5.25   0
  -6 -10  -5   19.72    5.85   0
  -5 -10  -5   29.99    7.35   0
  -4  -5  -6  223.55    3.17   0
  -1  -6  -5   34.81    3.30   0
   0  -8  -3    3.74    4.93   0
   0  -6  -4   29.28    3.60   0
   0  -5  -4  291.51    4.11   0
   2  -6  -1    2.82    3.64   0
  -7  -9  -5    1.40    5.19   0
  -6  -8  -6   92.76    4.99   0
  -6  -7  -6   51.12    3.45   0
  -4 -11  -3    2.37    5.60   0
  -3 -10  -4  106.60    7.15   0
  -3  -7  -6    2.89    3.63   0
  -3  -6  -6    7.70    2.78   0
  -2 -10  -3    1.20    6.31   0
  -1  -8  -4  182.00    6.76   0
   0 -10   1  117.11    6.47   0
   1  -9   1  283.73    9.25   0
   1  -7  -2  190.27    6.56   0
   2  -8   2   -0.29    6.23   0
   2  -7   0    3.63    5.17   0
  -7 -10  -4   54.87    5.17   0
  -6 -11  -3  175.94    6.55   0
  -5 -11  -3   30.37    6.16   0
  -5  -8  -6   -1.89    5.36   0
  -4  -6  -6  420.72    4.57   0
  -2 -11   0   -2.71    5.95   0
  -1 -10  -1   72.61    7.21   0
  -5  -7  -6   87.35    4.06   0
  -4 -10  -4   10.76    5.83   0
  -4  -7  -6  122.06    4.31   0
   0 -10   2    0.38    5.64   0
   0  -9  -1   61.59    6.65   0
   1  -9   2   11.58    6.91   0
  -6 -11  -2   52.49    6.06   0
  -6 -10  -4   67.23    6.77   0
  -6  -9  -5    7.04    5.18   0
  -5 -10  -4    6.80    6.28   0
  -4 -11  -2   49.63    5.81   0
  -3 -11  -1   19.88    5.68   0
  -2 -11   1   -0.52    4.91   0
  -2  -7  -5  589.09    5.84   0
  -2  -5  -5  705.74    5.13   0
  -1  -7  -4   73.24    4.64   0
   0 -10   3   -3.75    5.42   0
   0  -8  -2  155.12    8.16   0
   0  -7  -3  161.65    5.18   0
   1  -6  -2    0.58    3.28   0
  -5 -11  -2   27.63    5.88   0
  -3 -10  -3   17.85    6.63   0
  -2 -11   2   22.33    5.27   0
  -2  -6  -5   32.95    3.43   0
  -1 -10   0   -2.64    6.63   0
   0 -10   4   28.34    5.00   0
   1  -9   3   92.37    6.74   0
   2  -7   1   34.42    5.36   0
   2  -6   0    8.69    4.04   0
  -7  -9  -4    7.57    5.55   0
  -4 -11  -1   85.74    6.34   0
  -3 -11   0   11.89    6.19   0
  -2  -8  -4    8.11    5.28   0
  -1  -8  -3  366.40    8.13   0
  -1  -6  -4    2.56    3.14   0
   0  -9   0   15.46    5.77   0
   0  -6  -3    1.35    3.45   0
   1  -9   4    3.65    6.14   0
   1  -5  -2   57.18    3.26   0
  -6 -11  -1    4.88    5.46   0
  -6  -8  -5   16.86    4.72   0
  -6  -6  -5   93.08    3.62   0
  -5 -11  -1   53.65    6.56   0
  -4 -10  -3   17.55    6.13   0
  -4  -8  -5   76.14    5.17   0
  -3 -11   1    4.05    5.95   0
  -3  -7  -5   53.87    4.31   0
  -3  -5  -5  175.46    3.16   0
  -1 -10   1   68.69    7.15   0
  -1  -5  -4   37.32    2.72   0
  -6 -11   0   -3.59    5.35   0
  -6 -10  -3    9.23    6.26   0
  -6  -9  -4   17.60    6.22   0
  -6  -7  -5   26.22    3.87   0
  -5 -10  -3   85.21    7.08   0
  -5  -8  -5   17.49    5.34   0
  -5  -5  -5   14.61    2.22   0
  -3 -10  -2   31.40    7.02   0
  -3  -6  -5   68.13    3.42   0
   2  -7   2   56.22    6.81   0
   2  -5   0    0.43    3.54   0
  -7 -10  -2   57.76    5.93   0
  -5 -11   0  146.84    6.89   0
  -4  -7  -5    6.29    3.50   0
  -4  -5  -5  584.51    4.80   0
  -3 -11   2   31.40    6.40   0
  -2  -7  -4  156.92    5.35   0
  -1 -10   2    2.04    6.48   0
  -1  -9  -1  167.68    7.35   0
   0  -9   1   85.86    7.65   0
   0  -8  -1   12.48    5.34   0
  -5 -11   1    1.81    5.27   0
  -5  -6  -5  103.25    3.30   0
  -4 -11   1    1.18    5.84   0
  -4 -10  -2    7.35    6.71   0
  -4  -6  -5   61.43    3.09   0
  -1 -10   3    4.76    7.25   0
  -1  -7  -3  106.78    4.98   0
   1  -7   0   26.06    5.03   0
   1  -6  -1   99.42    4.75   0
  -7 -10  -1    4.94    5.74   0
  -5 -11   2    1.15    4.62   0
  -5 -10  -2   14.98    6.59   0
  -4 -11   2   28.15    5.51   0
  -1 -10   4    9.51    5.33   0
  -1 -10   5   42.93    6.71   0
  -1  -8  -2    1.21    5.41   0
   0  -9   2   98.07    7.09   0
  -4  -8  -4   83.68    5.23   0
  -2 -10   1    7.34    6.57   0
  -2  -6  -4  254.28    3.85   0
  -2  -5  -4  161.32    3.19   0
  -1  -9   0  198.42    7.66   0
   0  -8   0   35.71    6.69   0
   0  -6  -2   94.98    4.08   0
   2  -7   3    9.09    5.34   0
  -5  -8  -4  144.65    5.79   0
  -4 -10  -1   70.82    7.49   0
  -1  -6  -3  227.63    4.45   0
   0  -9   3   50.88    7.24   0
  -7  -9  -2  316.16    7.10   0
  -5 -10  -1   -0.55    6.58   0
  -2 -10   2   18.29    7.29   0
   1  -8   3   47.23    6.56   0
  -7 -10   1   10.71    4.90   0
  -6  -6  -4    7.88    3.16   0
  -4  -7  -4   75.69    3.91   0
  -3  -8  -3   48.15    5.02   0
  -3  -6  -4   12.13    3.03   0
  -2 -10   3    2.48    6.03   0
  -2  -7  -3   52.48    4.42   0
  -1  -9   1   14.84    5.85   0
  -1  -8  -1  113.48    6.33   0
  -1  -7  -2  269.22    5.60   0
   0  -9   4   -1.35    6.03   0
   0  -9   7   10.75    5.49   0
   0  -5  -2    2.64    2.50   0
   1  -7   1   33.91    4.71   0
   1  -6   0   81.78    4.71   0
   2  -5   1    3.25    2.82   0
  -7 -10   2   15.67    4.83   0
  -6 -10   0   37.00    6.38   0
  -6  -9  -2    3.38    6.85   0
  -5 -10   0   -7.25    7.68   0
  -5  -7  -4    3.43    3.99   0
  -3 -10   1   16.33    6.49   0
  -3  -5  -4   46.86    2.59   0
  -2 -10   4   -7.62    5.80   0
  -2 -10   5  -10.92    6.14   0
  -2  -8  -2   43.89    5.27   0
   0  -9   5    6.85    6.42   0
   0  -9   6    7.94    5.54   0
   0  -8   1   53.74    5.72   0
   1  -8   4   38.04    5.87   0
  -7  -9  -1   37.40    5.82   0
  -6  -8  -3   33.04    4.85   0
  -5  -6  -4   32.20    3.47   0
  -5  -5  -4  804.19    5.38   0
  -4  -6  -4   17.44    2.69   0
  -3 -10   2    6.96    6.32   0
  -2  -9   0  273.42    7.96   0
  -1  -9   2   14.54    6.51   0
  -5  -8  -3    8.13    4.69   0
  -4 -10   1   26.42    6.22   0
  -4  -5  -4  179.12    3.15   0
   0  -7   0    4.31    3.74   0
   0  -6  -1   11.96    3.05   0
   1  -8   6   25.43    6.60   0
   1  -8   7   33.59    5.97   0
   1  -7   2    6.63    4.74   0
  -4 -10   2   -7.62    5.92   0
  -3 -10   4   33.85    6.00   0
  -3 -10   5   -4.65    5.11   0
  -3  -8  -2   18.49    4.82   0
  -1  -9   3   -0.17    6.28   0
  -1  -8   0   60.14    5.38   0
  -1  -6  -2   88.44    3.59   0
   2  -6   3  258.38    6.18   0
  -7  -9   0    6.47    5.87   0
  -6 -10   3   16.88    5.00   0
  -6  -7  -3   31.00    3.96   0
  -5 -10   2   28.27    5.86   0
  -3  -9   0    1.19    6.79   0
  -2  -9   1   27.21    6.57   0
  -2  -8  -1    2.72    4.64   0
  -2  -5  -3  135.82    2.67   0
  -1  -7  -1   59.11    4.39   0
   1  -5   0  122.87    3.23   0
   2  -5   2   36.04    3.53   0
  -5 -10   3    0.40    5.17   0
  -5 -10   4   17.26    4.88   0
  -4 -10   4   -0.12    4.60   0
  -4 -10   5    1.44    4.56   0
  -4  -8  -2   11.84    4.51   0
  -1  -9   4   12.69    5.83   0
   6   1   6    7.28    3.48   0
   6   4   4  135.64    3.98   0
   8   1   6   45.20    5.87   0
  10   3   4   29.58    6.38   0
  10   4   3   -5.96    6.60   0
  11   0   2   22.54    5.64   0
   5  -2   5   69.94    3.55   0
   6   3   5  521.99    5.92   0
   6   5   2   12.68    2.72   0
   7  -2   5  124.34    5.41   0
   7   1   6   38.42    4.52   0
   9   0   5   74.74    7.55   0
  10   0   4   -3.24    7.15   0
  11   1   2   50.52    8.15   0
  11   2   2   10.32    6.09   0
   5   2   5   34.69    2.88   0
   5   4   3  252.49    3.86   0
   6  -2   5   10.83    3.75   0
   7   3   5   43.42    4.54   0
   7   4   4   47.00    4.10   0
   8   3   5   15.08    5.26   0
   8   5   2   24.71    5.06   0
   9  -3   2   43.26    6.12   0
   9   5   1   23.95    6.07   0
  10   2   4   10.81    7.46   0
  10   4   2   -0.43    6.88   0
  11   0   1   45.04    5.93   0
  11   3   0   45.54    7.95   0
   9   5   0   19.11    6.66   0
  11   2   1   -5.34    6.71   0
  11   3  -1   11.10    5.79   0
   5   3   4  132.21    3.25   0
   6   5   1   18.29    3.40   0
   8  -3   3    1.56    5.61   0
   8  -2   4    1.15    5.73   0
   8   0   5   74.44    5.80   0
   8   2   5  325.45    7.16   0
   9   5  -1   71.88    6.49   0
  10   0   3    5.44    7.60   0
  10   4   1   10.79    7.22   0
  11   0   0   17.12    5.31   0
  11   1   1    3.90    6.65   0
   5  -1   5    5.00    2.69   0
   5   1   5   87.88    3.19   0
   6   2   5   42.27    3.63   0
   6   4   3   94.78    3.41   0
   7  -1   5   -0.78    5.15   0
   7   2   5   93.13    4.71   0
   7   5   1   20.57    4.76   0
  10  -1   2   -4.80    6.82   0
  10   1   3  154.09    8.23   0
  10   2   3   20.40    7.75   0
  10   3   2   62.65    8.66   0
  10   4  -3    9.51    5.65   0
  10   4   0   20.18    7.26   0
  11   1   0  -12.73    5.85   0
  11   2  -1   48.05    6.97   0
   7   4   3    9.35    3.64   0
   8   5   0  116.12    5.50   0
   9   0   4   54.09    6.32   0
  10  -2   0   32.17    5.97   0
  10   4  -2   66.62    5.48   0
  10   4  -1    4.64    5.47   0
  11   1  -1    0.85    4.81   0
   5   4   2  555.98    5.09   0
   6   0   5  312.01    4.83   0
   6   1   5   40.01    3.49   0
   6   3   4  549.90    5.07   0
   7   3   4   40.04    4.08   0
  10   0   2  108.92    6.88   0
   7   5   0  167.38    4.51   0
   9  -2   2   45.20    6.10   0
  10  -1   1   24.06    6.11   0
  10   1   2   13.84    6.62   0
   5   2   4  379.80    3.83   0
   8  -3   2  167.10    6.10   0
   8  -2   3   15.78    5.15   0
  10  -2  -1   97.36    5.30   0
  10   3   0  -15.37    6.31   0
   5  -2   4  321.67    4.11   0
   5   3   3   44.96    2.20   0
   6  -2   4   42.21    3.31   0
   6   4   2  355.37    4.00   0
   7   2   4   31.35    3.66   0
   7   4   2  127.36    3.92   0
   7   5  -1   61.36    3.19   0
   8   3   3  181.92    5.36   0
   9  -3   0    8.29    4.27   0
   9   0   3   11.73    5.91   0
  10   0   1   61.26    6.91   0
  10   2   1   52.04    6.22   0
  10   3  -4    8.02    4.16   0
  10   3  -1   -0.99    5.52   0
   6   2   4  339.50    4.17   0
   7  -1   4   12.93    4.06   0
   8  -4   0    1.11    3.71   0
   9  -1   2    4.95    5.55   0
  10   1   1   45.28    5.83   0
  10   3  -3    2.28    4.41   0
  10   3  -2   50.57    5.69   0
   6  -3   3   12.55    3.29   0
   6   3   3   57.39    2.72   0
   7   0   4  569.59    5.65   0
   7   3   3   -3.03    3.15   0
   9  -2   1    0.09    5.67   0
   9   4  -4   -0.64    3.79   0
   9   4  -3  193.20    5.21   0
   9   4  -2   82.99    4.94   0
  10  -1  -1    5.87    4.73   0
  10   0   0    5.96    4.79   0
  10   2   0   -3.18    5.35   0
   5  -1   4   13.16    2.00   0
   5   1   4   82.14    2.32   0
   5   4   1   22.24    1.79   0
   6  -1   4  162.27    3.68   0
   6   1   4   52.12    2.94   0
   8   2   3   15.14    4.12   0
   8   3   2   92.40    4.55   0
   9  -3  -1   29.34    4.93   0
   9   0   2  -10.48    4.94   0
  10   1   0    7.66    5.15   0
  10   2  -1   -9.00    5.72   0
   5  -3   3   34.83    2.37   0
   5   0   4   13.50    2.08   0
   6   0   4    9.02    2.49   0
   6   4   1   24.39    2.42   0
   7  -2   3    4.59    3.41   0
   8   0   3  400.40    6.17   0
   8   1   3  207.49    5.45   0
  10  -1  -2    8.56    4.33   0
  10   0  -1   11.74    4.56   0
  10   1  -1    3.12    5.08   0
   7   2   3   18.95    3.31   0
   8  -4  -1   50.82    4.72   0
   9  -2   0  107.43    5.59   0
   9  -1   1   95.38    5.67   0
   9   3   0  166.29    5.16   0
  10  -1  -3   11.95    4.58   0
  10   1  -2   40.42    5.11   0
   5   2   3   47.98    2.26   0
   5   3   2    6.53    2.00   0
   7  -1   3  497.37    6.73   0
   7   3   2   49.35    3.24   0
   8   4  -1   25.59    4.06   0
   9   0   1    9.39    5.71   0
   9   3  -1  126.72    6.49   0
  10   0  -3   50.90    5.27   0
  10   1  -4   28.08    4.85   0
  10   1  -3   39.28    5.76   0
   6  -2   3    2.92    3.02   0
   6   2   3  557.83    4.69   0
   6   3   2   30.59    2.66   0
   7   1   3   24.46    3.89   0
   8   2   2   10.15    4.57   0
   9  -2  -1   79.88    7.48   0
   9   1   1   13.18    6.19   0
   9   3  -5    1.47    4.46   0
   9   3  -2   40.89    5.56   0
   5   4   0   82.71    2.54   0
   6   4   0    1.57    2.50   0
   7   0   3   11.78    4.63   0
   8  -4  -2   81.30    5.60   0
   8  -2   1   16.42    5.90   0
   8   1   2    5.99    4.93   0
   8   4  -4   20.80    4.66   0
   8   4  -3   20.49    4.74   0
   9  -3  -4   13.22    5.16   0
   9  -1   0   30.19    5.67   0
   9   2   0   81.82    5.86   0
   9   3  -4  111.89    5.55   0
   0  -6   4  116.03    6.02   0
   1  -5   6    2.72    6.08   0
   1  -2   6   77.92    4.55   0
   2  -5   7  113.38    9.30   0
   2  -1   7   19.75    3.56   0
   3  -7   6   11.98    8.69   0
   6  -2  10   -0.08    9.11   0
   6  -1  10   27.37    8.60   0
   8  -1  10   25.33    8.72   0
   9   1   9    8.20    6.97   0
   6   2   8   56.20    3.87   0
   7  -5   8    7.63    9.54   0
   7  -4   9    5.96    8.10   0
   7  -1  10   22.51    8.14   0
   9  -2   9   23.98    8.20   0
   1  -6   5    9.26    7.86   0
   1  -3   6    2.64    3.79   0
   2  -6   6   19.35    7.21   0
   3  -4   8    6.10    6.76   0
   4  -7   6   14.23    7.50   0
   4  -2   9   15.77    6.36   0
   5  -7   6   -1.71    6.43   0
   5   0   9   -4.12    4.76   0
   5   2   7  411.96    5.27   0
   7   1   9  104.14    7.39   0
   8  -3   9   10.13    8.38   0
   8   2   8    8.88    5.96   0
   9  -1   9    2.27    8.35   0
  10  -1   8    3.42    6.07   0
  10   0   8   10.91    5.87   0
   1  -7   4    3.27    6.24   0
   3  -8   4   12.61    7.46   0
   4  -6   7    7.55    8.09   0
   6  -6   7   -0.60    7.36   0
   7   2   8   31.08    4.01   0
   8  -5   7   17.80    6.44   0
   8  -4   8   13.42    7.73   0
   0  -5   4  207.07    5.12   0
   3   0   7   30.70    3.20   0
   4  -8   4    3.39    7.34   0
   4   0   8   76.88    4.28   0
   5  -6   7    9.75    7.86   0
   5  -1   9    6.28    5.68   0
   5   1   8   20.17    3.67   0
   6  -3   9    3.50    8.61   0
   7  -3   9    6.75    9.21   0
   8  -2   9   24.44    8.63   0
   8   0   9   16.57    8.89   0
   3  -5   7   -6.33    7.29   0
   4  -4   8   48.93    7.29   0
   4   1   7  203.97    4.12   0
   5  -2   9   52.14    7.00   0
   6   0   9   15.10    5.34   0
   7  -6   6    1.50    5.95   0
   7   0   9   48.03    6.95   0
   8  -1   9  188.71    9.19   0
   9   1   8   55.00    5.99   0
  10  -2   7    8.81    5.84   0
   1  -5   5    4.01    5.42   0
   2  -5   6   18.57    7.25   0
   3  -7   5   30.08    7.26   0
   6  -7   5   14.17    6.02   0
   6  -1   9   -4.05    5.92   0
   7  -4   8    7.29    7.00   0
   7  -2   9   19.64    7.15   0
   9  -2   8    3.45    7.83   0
   4  -7   5   25.45    8.58   0
   4  -3   8   15.06    5.50   0
   4  -1   8  110.43    4.79   0
   5  -4   8    2.20    7.54   0
   6  -4   8   47.97    7.71   0
   6   1   8   48.73    3.98   0
   6   2   7  243.68    4.20   0
   7  -5   7    4.98    6.40   0
   8  -3   8    9.89    7.43   0
   9  -1   8  103.25    8.17   0
   9   0   8  -11.90    6.57   0
  10  -1   7   -2.55    5.20   0
  10   0   7   10.74    5.55   0
   3  -4   7   -3.13    4.85   0
   3  -1   7  160.19    4.04   0
   4  -6   6   68.24    7.73   0
   5  -8   3   -7.17    6.10   0
   5   0   8  129.24    4.40   0
   6  -6   6   -0.38    7.43   0
   6  -5   7    7.73    7.42   0
   7   1   8  107.20    4.91   0
   7   2   7  197.41    5.15   0
   8  -5   6   15.30    6.35   0
   8  -4   7    2.96    6.20   0
   9  -4   6   10.72    5.43   0
   9  -3   7    1.31    5.97   0
   1  -6   4   32.50    4.94   0
   1  -3   5    1.90    2.92   0
   3  -8   3    3.42    6.13   0
   3  -3   7    0.37    4.51   0
   5  -6   6   64.99    7.43   0
   5  -3   8   47.58    6.34   0
   7  -3   8   34.10    7.42   0
   8  -2   8  183.65    8.26   0
  10  -2   6    7.02    5.40   0
   1  -7   3   26.74    5.56   0
   2  -3   6   18.01    3.50   0
   3  -2   7   -1.67    3.67   0
   4  -8   3   27.29    6.16   0
   4   0   7    1.68    3.03   0
   5  -2   8    5.91    5.11   0
   5  -1   8   10.32    4.72   0
   5   1   7  463.46    4.87   0
   6  -7   4   -3.18    7.28   0
   7  -6   5   13.59    5.65   0
   9   1   7   18.34    5.26   0
   3  -5   6   15.90    5.95   0
   4  -4   7  219.58    7.67   0
   7  -4   7   -0.85    7.31   0
   7   0   8   82.02    5.92   0
   9  -2   7   -1.63    7.30   0
  10  -1   6   16.11    5.86   0
  10   0   6   13.88    5.04   0
   3  -7   4   34.72    6.94   0
   6  -2   8    1.94    7.10   0
   6  -1   8  111.13    5.85   0
   7  -1   8   11.33    6.03   0
   8  -3   7  110.25    8.13   0
   9  -4   5    9.88    6.18   0
   9  -3   6   17.37    6.62   0
   9  -1   7   28.45    7.35   0
   9   0   7    7.39    6.18   0
   1  -5   4    3.83    4.71   0
   4  -3   7   41.59    5.35   0
   4  -1   7   10.00    3.78   0
   5  -8   2    1.53    5.72   0
   6  -6   5    0.86    7.92   0
   6  -4   7   65.53    8.47   0
   6   1   7  147.94    4.20   0
   6   2   6    8.00    2.45   0
   8  -4   6   18.61    6.79   0
   8   1   7    4.16    5.44   0
  10  -2   5    9.97    5.84   0
   4  -6   5   76.64    8.09   0
   5  -6   5   47.87    8.29   0
   5  -5   6   68.59    7.73   0
   7  -3   7    5.60    7.82   0
   7   2   6  167.33    4.69   0
   2  -7   3    7.97    6.28   0
   3  -8   2   17.09    6.83   0
   3  -1   6  219.66    4.32   0
   4  -8   2   13.82    6.57   0
   5  -3   7   66.91    6.91   0
   5   0   7   89.58    4.04   0
   8   0   7   12.28    7.27   0
   9  -2   6   12.56    7.61   0
  10  -1   5    7.44    6.15   0
  10   0   5   32.62    6.00   0
   1  -7   2    7.90    6.69   0
   1  -6   3   17.22    5.11   0
   2  -4   5  212.41    5.65   0
   5  -1   7  186.45    6.07   0
   7  -5   5   22.02    8.45   0
   7  -4   6    8.16    8.67   0
   9  -4   4   -2.87    7.07   0
   3  -7   3    7.96   10.23   0
   3  -5   5   28.70    6.87   0
   3  -2   6    8.57    3.76   0
   4  -4   6   34.88    7.23   0
   5  -7   3   24.89   10.88   0
   5   1   6  512.52    5.61   0
   6  -2   7  217.78    9.18   0
   6   0   7   29.17    4.71   0
   8  -5   4    0.56    7.10   0
   8  -3   6    1.42    8.94   0
   9  -1   6    5.48    8.23   0
   9   0   6  105.50    7.96   0
  10  -2   4    5.89    7.06   0
   2  -2   5  281.22    4.03   0
   3  -6   4   51.37    8.15   0
   4  -7   3   51.12    9.58   0
   4   0   6  257.94    4.66   0
   5  -8   1   -2.91    8.02   0
   6  -6   4  -12.59   10.23   0
   6  -4   6   39.78   10.41   0
   8   1   6   52.12    6.69   0
   8   5   2   17.64    5.07   0
   9   2   3    5.76    5.31   0
   9   3   3   35.22    5.18   0
  10   4  -6   24.75    5.20   0
   7   5   2   25.64    4.25   0
   8   4   3   70.30    5.49   0
   8   6  -5    7.08    4.14   0
   8   6  -1  231.37    6.50   0
   9   0   2   -8.39    5.16   0
   9   4   2    1.71    5.87   0
  10   0   0   16.23    5.44   0
  10   3   1   -3.07    5.51   0
   7   4   3    8.36    3.42   0
   7   6  -1    8.81    4.15   0
   8   0   3  362.98    5.53   0
   8   6  -2   22.60    5.42   0
   9   5  -6    3.22    4.94   0
   9   5   0   15.47    4.99   0
  10   3  -7   21.22    4.04   0
  10   4  -5   -4.11    4.64   0
   8  -1   2   95.37    4.79   0
   8   3   3  172.86    4.79   0
   8   5   1   26.15    4.49   0
   9   3   2   42.38    4.90   0
   9   4  -8   17.34    4.44   0
  10  -1  -6    0.38    3.88   0
  10  -1  -3    9.83    5.52   0
  10   3   0    0.71    6.31   0
  10   4  -4   53.27    5.76   0
  10   4  -2   69.99    5.94   0
   8   1   3  158.85    5.45   0
   8   2   3   15.19    4.31   0
   8   4   2  195.61    5.16   0
   9   2   2    2.15    4.52   0
   9   4   1   12.62    5.86   0
   9   5  -2   30.46    7.26   0
  10  -1  -5   35.38    4.85   0
  10  -1  -4   20.95    5.22   0
  10   4  -3   15.04    6.14   0
   7   3   3   -1.29    3.22   0
   7   5   1   18.33    4.14   0
   7   6  -3   24.08    4.45   0
   9  -1   0   30.61    5.09   0
   9   0   1    9.62    5.04   0
   9   3  -9   87.09    4.28   0
   9   5  -4    9.49    4.95   0
  10   0  -7   11.86    4.32   0
  10   0  -2    1.30    5.57   0
  10   2  -7   -0.77    4.79   0
  10   3  -6   10.22    4.08   0
   7   4   2  127.06    3.88   0
   9  -2  -2   53.61    4.55   0
   9   3   1   50.55    4.97   0
   9   4   0   10.32    5.24   0
  10   1  -7    7.23    4.88   0
  10   3  -5    0.47    5.41   0
   8   0   2   94.66    4.65   0
   8   3   2   95.54    4.66   0
   8   4   1    9.43    4.09   0
   9   1   1   13.21    5.15   0
   9   2   1  158.06    5.22   0
   9   4  -7   28.97    4.41   0
  10   0  -4  120.58    7.10   0
  10   1  -2   38.12    5.96   0
  10   2  -6   -0.68    5.23   0
  10   2  -2   29.79    5.50   0
  10   3  -4    7.88    5.95   0
  10   3  -3    4.32    5.09   0
   7   5   0  170.03    4.71   0
   8   4  -9   15.22    3.73   0
   8   5  -6    4.77    4.46   0
   9   4  -6   15.19    5.82   0
  10   1  -6    0.66    4.91   0
  10   1  -3   33.90    5.72   0
  10   2  -5   -3.75    5.60   0
  10   2  -4   -1.09    5.86   0
  10   2  -3   33.38    4.99   0
   8  -1   1   21.79    4.16   0
   8   2   2    9.67    3.83   0
   8   5  -3   85.04    6.19   0
   8   5  -2  119.94    5.41   0
   9   0   0   -0.90    4.88   0
   9   3  -8   18.74    4.58   0
  10   1  -5   15.46    5.57   0
  10   1  -4   35.03    5.59   0
   7   3   2   43.46    3.23   0
   7   4   1  271.65    4.44   0
   7   5  -1   66.45    4.29   0
   8   4   0   72.63    4.90   0
   8   5  -4  108.43    5.36   0
   9  -2  -4   22.72    5.05   0
   9   1   0  388.02    6.07   0
   9   2  -9    4.76    4.11   0
   9   2   0   87.10    4.87   0
   8   3 -10   13.97    3.75   0
   8   3   1  169.51    5.19   0
   8   4  -8   23.99    5.33   0
   9  -2  -7   34.57    5.30   0
   9  -1  -9   64.19    4.19   0
   9   3  -1  126.84    6.04   0
   7   2   2   18.56    2.57   0
   7   5  -2   52.19    4.36   0
   8   0   1    4.10    4.18   0
   8   2 -11    8.30    3.33   0
   8   2   1   44.18    4.19   0
   8   4  -1   26.20    4.65   0
   9  -2  -6   11.21    4.62   0
   9  -2  -5   15.56    4.41   0
   9   1  -9   62.03    5.78   0
   9   3  -7   53.28    5.10   0
   7   1   2  136.51    3.55   0
   7   4   0   -1.29    3.09   0
   7   5  -3   64.64    4.49   0
   8  -2  -1    1.72    3.67   0
   8  -1   0   16.47    4.25   0
   9   0  -9    5.90    4.61   0
   9   1  -1   39.97    5.05   0
   9   2  -8  126.86    5.36   0
   9   2  -1   49.33    5.00   0
   9   3  -6  104.23    6.16   0
   9   3  -3  104.22    5.76   0
   7   3   1   61.26    3.38   0
   8   4  -7   49.45    5.09   0
   8   4  -2   58.63    4.40   0
   9  -1  -8   12.08    5.13   0
   9   0  -2    1.14    5.58   0
   9   2  -2   98.22    5.56   0
   9   3  -5    3.54    4.96   0
   6   5  -3  106.92    4.18   0
   7  -1   1    7.00    3.00   0
   7   3 -11   60.35    4.40   0
   7   4  -9   47.62    4.23   0
   8  -3  -4  149.50    4.66   0
   8   3  -9   22.37    4.76   0
   8   4  -3   19.12    4.05   0
   9  -1  -7   -5.03    4.87   0
   9   0  -8    1.34    4.56   0
   9   1  -8    4.48    4.88   0
   9   1  -2    9.83    4.57   0
   9   2  -7   50.01    5.28   0
   6   5  -6    4.90    4.05   0
   6   5  -4  508.55    6.07   0
   8  -3  -9    4.07    4.24   0
   8  -2  -2  164.83    4.45   0
   8   0   0  190.90    5.27   0
   8   1 -11   11.30    3.85   0
   8   2 -10   34.04    4.94   0
   8   4  -4   19.22    4.97   0
   9  -1  -6   95.44    5.68   0
   9   1  -7   38.10    6.20   0
   9   1  -3   80.79    5.02   0
   9   2  -6    0.40    4.70   0
   9   2  -3  204.44    6.12   0
   6   5  -5  133.80    4.54   0
   7   0   1   61.21    3.27   0
   7   2 -12   63.45    3.92   0
   7   2   1   62.65    3.07   0
   8  -3  -5    9.56    4.32   0
   8  -1  -1  220.81    5.23   0
   9   0  -7    7.35    5.18   0
   9   0  -5  177.79    6.13   0
   9   1  -6   10.98    4.62   0
   6   3 -12    4.50    3.25   0
   7   1   1   49.77    3.41   0
   7   3   0  550.52    5.34   0
   7   4  -8    1.81    4.64   0
   7   4  -2   90.40    4.38   0
   8  -3  -6   -3.44    4.70   0
   8  -1 -11   17.44    4.16   0
   8   0 -11   57.34    4.72   0
   8   3  -2   -2.30    4.16   0
   7   3 -10   83.97    5.35   0
   8  -2 -10    8.73    4.41   0
   8  -2  -3  158.36    5.20   0
   8   0  -1   77.25    4.80   0
   8   1  -1   11.56    4.32   0
   8   3  -3   88.06    4.62   0
   6   2 -13   -3.29    3.73   0
   7  -1   0   78.08    3.57   0
   7   0 -13   15.25    4.18   0
   7   4  -3  225.56    5.17   0
   8  -1  -2  162.32    5.29   0
   8   1 -10  125.00    4.81   0
   8   3  -4  129.14    5.60   0
   6   4  -2   30.96    2.91   0
   7  -2  -1  214.42    4.37   0
   7   2   0   18.68    2.33   0
   7   3  -1   70.05    3.28   0
   7   4  -6    3.12    4.59   0
   7   4  -5  118.61    4.99   0
   7   4  -4  420.21    5.83   0
   8  -2  -9   12.45    4.67   0
   8  -1 -10   11.19    4.58   0
   8   0 -10    7.97    4.60   0
   8   2  -2   60.39    4.43   0
   7  -4 -10   -2.68    3.82   0
   7   0   0   -1.60    3.02   0
   7   1 -12   -0.25    4.04   0
   7   1   0    4.60    3.09   0
   7   3  -9    2.49    5.70   0
   8  -2  -8    6.21    6.27   0
   8  -1  -3    7.10    4.78   0
   8   0  -2   30.39    4.59   0
   8   1  -9    4.67    5.00   0
   8   1  -2   38.06    4.59   0
   8   2  -3    2.15    4.98   0
   6   3 -11   11.73    4.01   0
   6   4  -8   65.12    5.00   0
   7  -4  -9   72.73    4.99   0
   7  -4  -6    6.47    3.80   0
   7  -3  -3   33.94    3.50   0
   7   3  -2   34.68    3.57   0
   8  -2  -6   13.01    4.85   0
   8  -1  -9   54.44    5.38   0
   8   0  -9   18.86    5.87   0
   8   2  -4   43.45    5.34   0
   7  -4  -8  201.21    5.37   0
   7  -4  -7   31.64    3.53   0
   7  -1  -1   70.63    3.84   0
   7   2  -1  532.33    5.33   0
   8  -1  -4    5.24    5.16   0
   8   0  -3   44.99    4.82   0
   8   1  -8   58.64    4.91   0
   8   1  -3    1.62    4.60   0
   8   2  -5   99.60    5.54   0
   5   3 -12    1.17    3.63   0
   6  -5 -11   11.19    3.84   0
   6   0 -14   59.57    4.12   0
   6   4  -7    1.91    4.23   0
   6   4  -4   70.98    3.76   0
   7  -3 -11  113.65    5.01   0
   7  -2 -12   14.55    4.53   0
   7  -2  -2  218.98    4.46   0
   7   0 -12   -2.56    4.25   0
   7   1  -1   31.98    3.33   0
   7   2 -10    3.56    4.68   0
   7   3  -3   99.02    4.27   0
   8  -1  -8    0.82    5.10   0
   8  -1  -7   36.07    5.51   0
   8   0  -8   75.01    4.86   0
   8   0  -4  250.46    5.56   0
   8   1  -4   -0.51    5.10   0
   6   2 -12   11.85    4.53   0
   6   3 -10   44.93    5.32   0
   7  -3  -4   -5.00    3.65   0
   7  -1 -12   13.20    5.02   0
   7   0  -1   43.43    3.66   0
   7   1 -11   -5.88    4.66   0
   7   2  -2  132.63    4.32   0
   7   3  -6   41.38    4.74   0
   7   3  -5  101.56    4.40   0
   7   3  -4  285.39    5.43   0
   6  -2 -14    3.17    5.20   0
   6  -1 -14   23.79    4.36   0
   6   1 -13    9.17    3.89   0
   6   3  -2    3.74    2.57   0
   7  -3 -10   50.07    5.87   0
   5   4  -8    6.39    3.54   0
   6  -5 -10   17.80    3.76   0
   7  -3  -5    6.28    3.98   0
   7  -2 -11   64.65    5.11   0
   7  -1  -2  151.48    4.48   0
   7   0 -11   -2.37    4.63   0
   7   1  -2  469.97    5.26   0
   5   0 -15   -0.23    3.70   0
   5   2 -13   -1.29    3.73   0
   5   4  -7   15.83    3.50   0
   5   4  -5  240.55    3.98   0
   6  -5  -9   16.26    3.60   0
   6   3  -9   45.19    5.01   0
   6   3  -3    5.19    3.14   0
   7  -3  -9   10.93    5.59   0
   7   0  -2    1.18    3.76   0
   5   1 -14    4.45    3.68   0
   6  -4 -12    7.96    4.43   0
   6  -3 -13   17.92    4.65   0
   6   0 -13   71.52    4.29   0
   6   2 -11   50.11    5.14   0
   7  -3  -8  135.35    5.30   0
   7  -3  -7  224.70    5.55   0
   7  -2 -10   67.36    5.38   0
   7  -2  -4   13.95    4.38   0
   7  -1  -3   18.03    4.23   0
   7   1  -3   53.87    3.78   0
   7   2  -7    0.64    4.22   0
   7   2  -6   20.96    4.65   0
   7   2  -5  246.79    5.40   0
   4   0 -16   23.29    3.54   0
   6   3  -8   10.30    4.52   0
   6   3  -4   73.37    3.97   0
   7  -1 -10   20.53    5.42   0
   7   0 -10    1.09    4.52   0
   4   1 -15    5.48    3.83   0
   5  -3 -15   -3.51    5.29   0
   5  -1 -15    1.38    4.00   0
   5   3 -10   28.40    4.89   0
   6  -2 -13   63.98    5.25   0
   6  -1 -13   18.94    4.77   0
   6   3  -7   52.02    4.67   0
   6   3  -6  265.04    5.18   0
   6   3  -5   39.12    4.11   0
   7  -2  -5   64.46    4.88   0
   7  -1  -4    7.68    4.15   0
   7   1  -4    5.09    4.04   0
   5  -5 -13   20.05    5.20   0
   5  -2 -15   18.52    4.90   0
   5   2 -12   28.58    4.12   0
   6  -4 -11   10.01    4.84   0
   6  -4  -5   -3.73    3.55   0
   6  -2  -2  586.17    5.07   0
   7  -2  -6   60.10    5.55   0
   7  -1  -9   14.63    5.02   0
   7   1  -6  185.08    5.78   0
   6  -4  -6   17.44    4.60   0
   6  -3 -12   17.31    4.59   0
   6   0 -12    4.29    4.93   0
   6   1 -11   37.10    5.43   0
   6   2  -9    3.88    5.77   0
   6   2  -3    1.41    2.64   0
   7  -1  -7    2.26    4.92   0
   7  -1  -6    3.77    4.26   0
   7  -1  -5    1.82    4.09   0
   7   0  -8   19.22    5.22   0
   7   0  -7  149.04    5.70   0
   7   0  -6  111.15    5.41   0
   7   0  -5   12.87    4.52   0
   4  -1 -16  107.15    5.67   0
   4   3 -11    2.69    3.36   0
   5  -4 -14    8.82    4.69   0
   5   0 -14    2.86    4.20   0
   5   1 -13    9.81    4.80   0
   6  -2 -12  198.58    6.73   0
   6  -1  -2  134.03    3.12   0
   5  -5 -12   16.49    5.68   0
   5   3  -8   13.66    4.07   0
   6  -3  -4   25.83    3.43   0
   6  -2  -3  176.87    4.50   0
   6  -1 -12   25.19    5.30   0
   6   2  -8   73.24    4.50   0
   6   2  -4    7.31    1.94   0
   3  -1 -17   14.60    4.00   0
   4  -5 -15   17.03    4.79   0
   5  -3 -14   39.34    6.24   0
   5  -1 -14    9.15    4.45   0
   5   3  -7   50.60    4.10   0
   5   3  -6  246.56    4.27   0
   5   3  -5  606.87    4.90   0
   6   0 -11   -1.78    4.62   0
   6   1  -3   -2.26    2.72   0
   6   2  -6    2.34    3.96   0
   6   2  -5    3.08    2.72   0
   4  -3 -16   17.60    5.57   0
   4  -2 -16    1.07    4.85   0
   4   0 -15   91.09    4.76   0
   4   1 -14   43.72    4.74   0
   4   3 -10    5.99    3.58   0
   5  -4 -13   14.22    5.80   0
   5  -2 -14   -0.69    4.64   0
   6  -3 -10    6.45    5.17   0
   6  -3  -5   19.31    4.18   0
   6  -2 -11    7.88    5.27   0
   6  -1 -11  174.65    5.47   0
   6  -1  -3  195.07    4.04   0
   6   1  -9   28.72    4.78   0
   2   0 -17   -3.38    2.92   0
   3   0 -16   63.23    5.52   0
   3   1 -15   14.84    3.88   0
   4  -6 -13   -3.67    4.39   0
   5   0 -13    3.46    4.94   0
   5   1 -12    5.25    4.70   0
   5   2 -10   53.17    4.74   0
   6  -3  -6  247.02    5.42   0
   6  -2  -4   74.02    3.50   0
   6   1  -4    7.22    3.34   0
   4   3  -9   50.47    3.88   0
   5  -5 -10   46.78    4.53   0
   5  -5  -7    3.99    3.69   0
   6  -3  -8  198.75    5.77   0
   6  -3  -7    2.71    4.56   0
   6  -1  -4   84.85    4.13   0
   6   0  -4   19.07    3.15   0
   6   1  -6  164.64    4.56   0
   3  -2 -17    1.90    3.97   0
   4  -4 -15   -0.07    6.83   0
   4  -1 -15    0.56    4.42   0
   4   3  -8  168.75    3.93   0
   5  -5  -9  104.35    4.91   0
   5  -3 -13   61.52    5.42   0
   5  -1 -13   13.24    5.24   0
   5   2  -9   21.44    4.61   0
   6  -2  -9   30.05    4.92   0
   6  -2  -5  222.14    5.07   0
   3  -3 -17    0.21    4.59   0
   4  -6 -12   29.20    5.10   0
   4  -5 -14   11.73    4.96   0
   5  -3  -3   11.87    2.41   0
   5  -2 -13    3.52    5.55   0
   5   1 -11    0.75    5.42   0
   5   2  -8   20.52    4.26   0
   6  -2  -8    1.60    3.96   0
   6  -2  -7   58.33    4.92   0
   6  -2  -6    8.00    4.16   0
   6  -1  -9   32.17    5.16   0
   6  -1  -5    0.50    3.49   0
   6   0  -8  106.82    5.59   0
   6   0  -7  231.84    5.34   0
   6   0  -6   13.28    4.08   0
   6   0  -5  190.00    4.32   0
   3  -7 -13    5.83    3.90   0
   3  -6 -15   15.84    5.17   0
   4  -3 -15   10.65    5.11   0
   4  -2 -15   -0.33    4.78   0
   4   0 -14   -1.42    5.15   0
   4   2 -11   26.37    4.46   0
   5  -4  -5  171.18    4.07   0
   5   2  -7   78.33    4.24   0
   5   2  -6  162.78    4.27   0
   5   2  -5   16.90    2.51   0
   6  -1  -8   15.38    5.08   0
   6  -1  -7   -2.36    4.09   0
   6  -1  -6    8.42    4.25   0
   1  -1 -18    9.33    3.20   0
   2  -3 -18    5.04    3.86   0
   3  -5 -16   28.49    4.87   0
   3  -1 -16   19.12    4.79   0
   5  -4 -11   13.41    4.85   0
   5  -3 -12  230.61    6.96   0
   2  -1 -17    6.98    4.73   0
   3  -7 -12    4.52    4.16   0
   3   0 -15   -1.35    5.85   0
   3   2 -12   38.13    4.56   0
   4   2 -10  265.35    5.94   0
   5  -4  -6    9.88    3.95   0
   5  -3  -4  172.64    3.85   0
   5  -2 -12  156.68    5.64   0
   5   0 -11   54.65    5.17   0
   2   0 -16   -0.03    5.19   0
   4  -1 -14    2.91    5.32   0
   4   1 -12   18.14    5.06   0
   5  -4  -9  128.45    5.77   0
   5  -4  -8  133.68    5.48   0
   5  -4  -7    5.43    4.46   0
   5   1  -9   49.78    4.01   0
   3  -4 -16   14.38    5.47   0
   3  -2 -16   -4.94    4.63   0
   4   2  -9   54.92    4.19   0
   5  -3  -5   43.35    3.49   0
   5  -1 -11   89.11    5.68   0
   5   0 -10   26.08    4.74   0
   5   1  -8   29.73    4.26   0
   5   1  -7    9.22    3.69   0
   5   1  -6   28.73    3.11   0
   5   1  -5  236.55    3.66   0
   2  -7 -15   -1.82    3.94   0
   3  -3 -16   15.08    5.68   0
   5  -3 -10    2.95    4.79   0
   2  -5 -17    1.56    4.66   0
   2  -2 -17    4.37    4.49   0
   3  -5 -15   26.65    5.44   0
   3   1 -13   23.93    4.95   0
   3   2 -11   31.20    3.89   0
   4   1 -11  178.00    5.42   0
   4   2  -8    5.05    3.08   0
   4   2  -7   97.72    3.09   0
   5  -3  -9   64.78    4.77   0
   5  -3  -7  161.72    5.17   0
   5  -3  -6    8.36    3.64   0
   5  -1 -10  339.71    6.62   0
   1  -2 -18   -2.48    3.82   0
   2  -6 -16  133.41    5.94   0
   4  -5 -11    1.55    5.11   0
   4  -5  -6    0.30    2.53   0
   5  -2  -9    5.71    4.79   0
   5  -2  -5  137.87    3.84   0
   5  -1  -9   39.36    5.35   0
   5  -1  -5    4.55    2.77   0
   5   0  -8   10.31    4.09   0
   5   0  -6  356.22    4.72   0
   2  -4 -17    8.55    5.29   0
   2  -3 -17   -8.70    4.36   0
   3  -6 -13   85.97    5.33   0
   3  -4 -15    2.51    5.62   0
   4  -5  -7   93.20    4.39   0
   4   1 -10    1.41    4.14   0
   5  -2  -8   64.93    4.71   0
   5  -2  -6   34.46    3.98   0
   5  -1  -8   25.72    4.35   0
   5  -1  -7  207.09    4.52   0
   5  -1  -6   84.14    3.63   0
   0  -3 -19    0.15    3.78   0
   1  -5 -18   17.12    4.55   0
   1  -1 -17    3.67    5.40   0
   2  -7 -14   -5.72    5.32   0
   2  -1 -16    4.69    5.75   0
   2   0 -15   10.96    4.80   0
   3  -5 -14    4.62    6.63   0
   3  -3 -15    6.53    5.96   0
   3  -2 -15   51.50    6.01   0
   3   1 -12   41.90    6.06   0
   4  -5  -9   10.01    4.65   0
   4  -5  -8    6.25    4.19   0
   4  -1 -12   40.81    4.97   0
   1  -4 -18   26.10    4.94   0
   1  -3 -18    6.18    4.33   0
   1   0 -16   18.31    5.25   0
   3  -6 -12   46.87    4.93   0
   3   2  -9  155.50    4.29   0
   4  -4  -5    4.99    3.30   0
   4   0 -11    0.20    3.91   0
  -1  -2 -19   18.10    3.18   0
   0  -5 -19   13.33    3.77   0
   0  -4 -19   87.75    4.25   0
   1  -8 -14   15.25    4.88   0
   1  -7 -16  142.14    6.14   0
   2  -6 -15   79.81    7.44   0
   2  -5 -16   -4.03    6.67   0
   2   2 -11  140.24    4.30   0
   4  -2 -12   16.09    5.43   0
   4   1  -8   64.80    3.83   0
   1  -6 -17   15.27    5.46   0
   2  -7 -13    1.23    4.45   0
   2  -2 -16   18.42    6.05   0
   2   1 -13  212.57    5.30   0
   3  -5 -13   13.39    6.77   0
   3  -4 -14    6.39    5.80   0
   3   1 -11   69.19    5.02   0
   3   2  -8   80.42    3.15   0
   4  -4 -10   18.75    5.05   0
   4  -4  -6   67.63    3.50   0
   4  -3 -11   64.52    5.35   0
   4  -1 -11  233.78    6.28   0
   4   1  -7  285.15    4.30   0
   1   1 -14   70.86    5.24   0
   2  -4 -16   -1.50    5.74   0
   2  -3 -16   17.89    6.56   0
   3  -6 -10   36.01    4.47   0
   3  -3 -14   22.62    5.40   0
   4  -4  -8   24.41    4.35   0
   4  -4  -7   12.99    3.74   0
   4  -2 -11   15.60    5.47   0
   0  -8 -16   24.13    4.64   0
   0  -2 -18    1.40    4.15   0
   1  -2 -17   12.16    5.77   0
   2   0 -14   31.19    4.94   0
   2   2 -10   45.34    2.95   0
   3  -6  -9   42.31    4.04   0
   3  -1 -13    3.15    4.42   0
   3   0 -12   71.74    4.95   0
   4  -3 -10  110.87    4.92   0
   4  -1 -10   13.81    4.29   0
   4   0  -8  568.97    5.47   0
   0  -6 -18    8.75    4.85   0
   0   0 -16   -1.04    4.73   0
   1  -5 -17    2.92    5.77   0
   2  -6 -14    6.77    5.74   0
   2  -5 -15  115.63    7.00   0
   3   1 -10  320.52    5.64   0
   4  -3  -9   32.26    4.31   0
   4  -2 -10  115.13    5.47   0
   4  -1  -9    9.48    4.29   0
   4   0  -7  239.79    3.90   0
  -2  -2 -19   14.71    3.08   0
  -1  -3 -19    5.19    4.09   0
   0  -7 -17   33.61    6.02   0
   0  -1 -17    3.54    4.61   0
   1  -7 -15   28.88    5.79   0
   1  -4 -17    3.02    5.29   0
   1  -3 -17   11.78    5.46   0
   1  -1 -16   66.83    5.95   0
   3  -3 -13  125.12    6.46   0
   3  -2 -13   84.58    5.61   0
   4  -3  -8  179.17    5.12   0
   4  -3  -7    4.05    3.74   0
   4  -3  -6   98.18    3.38   0
   4  -2  -9  110.21    4.85   0
  -1  -6 -19    7.72    4.21   0
   0  -3 -18   26.68    4.97   0
   1  -6 -16   10.05    5.83   0
   2  -4 -15    4.26    5.47   0
   3  -1 -12  189.67    5.93   0
   3   1  -9  274.58    4.59   0
   4  -2  -7  163.51    3.66   0
   4  -2  -6   11.50    2.92   0
   4  -1  -7    7.08    3.07   0
  -1  -4 -19    0.32    4.72   0
   0  -5 -18    7.29    4.78   0
   0  -4 -18   14.92    4.61   0
   1   1 -13   44.56    4.30   0
   2  -6 -13   -2.67    4.81   0
   2  -3 -15   76.41    6.24   0
   2  -1 -14   19.69    5.68   0
   2   0 -13   13.37    4.75   0
   3  -5 -10   19.23    4.92   0
   3  -5  -6   26.71    3.34   0
  -1  -9 -15   37.87    4.30   0
  -1  -8 -17   14.65    4.18   0
  -1  -5 -19   31.91    4.64   0
   0  -8 -15   10.89    5.04   0
   1  -7 -14   -0.88    6.64   0
   2   1 -11   47.20    4.34   0
   3  -3 -12   33.46    5.16   0
   3  -2 -12   -7.02    5.07   0
  -1  -7 -18   14.42    4.68   0
   0  -2 -17    1.40    6.86   0
   1  -5 -16    5.95    6.61   0
   1   0 -14   33.19    6.03   0
   2  -2 -14   77.16    6.08   0
   3  -5  -8   15.40    3.78   0
   3  -4 -11   20.89    4.51   0
   3  -1 -11   -1.47    4.61   0
  -2  -7 -19   22.97    4.01   0
  -1  -1 -17   -0.66    5.12   0
   0  -7 -16  -11.34    6.55   0
   0  -6 -17   91.64    6.11   0
   0   0 -15  -10.59    5.07   0
   1  -6 -15  139.18    7.54   0
   1  -4 -16    4.00    5.86   0
   2  -3 -14    2.05    6.05   0
   2   0 -12  132.64    5.53   0
   3  -3 -11    9.62    4.91   0
   3  -2 -11   20.00    5.28   0
   3   0  -9   11.78    3.63   0
  -2  -8 -18   -5.09    3.72   0
   0  -8 -14   17.22    5.78   0
   1  -7 -13   24.77    6.18   0
   1   1 -12  555.29    6.36   0
   2  -6 -11    2.73    6.12   0
   2  -1 -13   56.52    4.96   0
   2   1 -10   25.64    3.34   0
   3  -4 -10  249.52    6.08   0
   3  -1 -10    3.64    3.79   0
  -3  -5 -20    0.18    3.61   0
  -1  -9 -14   31.08    4.42   0
  -1  -6 -18   17.62    5.27   0
  -1  -3 -18    1.54    5.96   0
   3  -4  -9    4.57    4.24   0
   3  -2 -10   74.44    4.76   0
  -2  -6 -19    0.71    4.58   0
   0  -4 -17   11.97    5.86   0
   1  -5 -15   -0.57    6.15   0
   1  -2 -15   42.98    6.93   0
   2  -6 -10    1.11    4.67   0
   2  -5 -12   -4.80    4.85   0
   2  -4 -13   24.02    5.11   0
   2  -2 -13   35.79    5.23   0
   2   0 -11    4.30    4.77   0
   3  -4  -7  122.47    4.23   0
   3  -1  -9   48.83    3.50   0
  -2  -9 -16    7.43    4.22   0
  -2  -5 -19    6.96    5.29   0
  -2  -4 -19    4.80    4.39   0
  -2  -2 -18   -3.26    4.01   0
  -1  -7 -17   63.87    5.41   0
  -1  -5 -18    7.19    4.75   0
  -1  -4 -18   12.01    5.30   0
   0  -8 -13   13.25    5.66   0
   0  -7 -15   28.90    7.21   0
   1  -6 -14   41.03    6.69   0
   1  -1 -14   43.78    5.36   0
   1   0 -13   47.40    4.76   0
   2  -6  -9    6.58    3.98   0
   2  -6  -8   65.60    4.00   0
   2  -3 -13    6.94    5.18   0
   2  -1 -12  124.17    5.11   0
   3  -2  -9   59.13    4.18   0
   3  -1  -8  463.41    4.82   0
  -1  -2 -17   14.87    6.22   0
   0  -6 -16   62.21    6.42   0
   1   1 -11   19.06    3.23   0
   3  -3  -8    2.97    3.60   0
   3  -3  -7   31.97    2.94   0
   3  -2  -8  269.48    4.42   0
  -3  -3 -19    3.69    3.78   0
  -1   0 -15    5.32    4.57   0
   0  -1 -15    5.75    5.69   0
   0   0 -14    4.28    4.51   0
   1  -7 -11   82.24    5.05   0
   2  -5 -11   11.50    4.64   0
   2  -4 -12    1.43    4.56   0
   2  -2 -12   17.53    4.37   0
   2   0 -10   37.66    3.71   0
  -4  -6 -20   -6.60    4.42   0
  -4  -5 -20   -1.12    3.50   0
  -3  -9 -17   25.83    5.02   0
  -3  -7 -19   -2.00    4.59   0
  -2  -8 -17   -2.63    5.37   0
  -2  -7 -18   34.48    5.13   0
  -1  -8 -15   -0.87    6.03   0
   1  -7 -10   21.21    4.29   0
   1  -2 -14   17.98    4.82   0
   2  -3 -12    0.84    5.45   0
   2  -1 -11    3.79    4.01   0
  -3  -2 -18   -0.61    4.33   0
  -2  -9 -15   -0.55    5.64   0
  -2  -3 -18   -0.92    5.09   0
  -1  -6 -17   56.31    6.03   0
  -1  -3 -17   25.61    7.38   0
   0  -7 -14   12.06    5.39   0
   1  -7  -9    4.07    3.44   0
   1  -4 -14   10.81    5.98   0
   1  -3 -14   43.67    5.51   0
   1  -1 -13    7.21    4.58   0
   1   0 -12   -1.86    4.26   0
   2  -4 -11   18.50    4.85   0
  -4  -8 -19   13.40    4.06   0
  -3  -8 -18    1.94    4.81   0
  -3  -4 -19    3.33    3.97   0
   1  -6 -12   54.14    6.27   0
   2  -5  -9    4.28    3.75   0
   2  -5  -8    2.63    3.34   0
   2  -3 -11   14.43    4.47   0
   2  -2 -11    9.02    4.07   0
  -3  -6 -19    0.45    4.36   0
  -2  -6 -18   67.36    5.37   0
  -2  -4 -18   23.08    5.34   0
  -1  -4 -17   -4.49    6.31   0
   0  -2 -15    9.43    6.06   0
   0   0 -13    7.05    4.16   0
   1  -5 -13   66.46    5.80   0
   2  -4 -10    0.64    3.85   0
   2  -1 -10  239.81    4.91   0
  -5  -5 -20   -1.67    2.92   0
  -2  -5 -18    3.27    5.25   0
  -2  -2 -17   21.20    5.18   0
  -1  -8 -14   97.47    5.82   0
  -1   0 -14   11.31    5.05   0
   0  -1 -14    1.73    4.77   0
   1  -2 -13    5.50    4.51   0
   2  -3 -10   10.98    3.74   0
   2  -2 -10   20.79    4.04   0
  -5  -6 -20    8.10    3.35   0
  -3  -9 -16   15.87    5.88   0
  -2  -9 -14   32.81    4.66   0
  -2  -7 -17    2.12    6.05   0
  -1  -6 -16   17.86    6.37   0
   0  -4 -15   41.33    7.33   0
   0  -3 -15   51.21    6.70   0
   1  -4 -13    1.76    5.36   0
   1  -3 -13   11.41    5.38   0
   1  -1 -12    4.09    4.49   0
   2  -1  -9  175.50    3.91   0
  -4  -7 -19    5.28    4.40   0
  -4  -4 -19    2.71    5.02   0
  -3  -7 -18   28.57    6.37   0
  -3  -3 -18   72.68    6.20   0
  -1  -7 -15   10.30    6.18   0
   1  -6 -10    3.10    4.39   0
   2  -4  -8    6.95    3.23   0
   2  -3  -9   47.52    3.44   0
   2  -2  -9    8.92    3.34   0
  -5  -8 -19   10.01    4.14   0
  -3  -8 -17    5.58    5.96   0
   1  -2 -12   15.97    4.59   0
  -5  -9 -18   -4.37    3.68   0
  -4 -10 -15   16.00    4.00   0
  -4  -9 -17   -0.17    4.76   0
  -4  -8 -18   -2.57    6.31   0
  -4  -6 -19   14.18    4.02   0
  -4  -5 -19    1.65    4.05   0
  -2  -9 -13   36.18    4.33   0
  -2  -6 -17   45.43    5.77   0
   0  -1 -13   43.01    5.29   0
   0   0 -12   12.79    3.83   0
   1  -4 -12   11.91    4.98   0
   1  -3 -12   -3.15    4.90   0
   1  -1 -11   11.62    3.96   0
  -3  -6 -18   -5.85    5.18   0
  -3  -2 -17   40.35    4.94   0
  -2  -5 -17   60.42    5.82   0
  -2  -4 -17   20.53    6.26   0
  -1  -2 -15   48.35    6.65   0
   0  -6 -13   11.26    5.79   0
   0  -4 -14   -8.49    6.29   0
   0  -3 -14   47.55    6.32   0
  -5 -10 -16   33.46    4.68   0
  -5  -4 -19    2.23    3.80   0
  -3  -9 -15   40.68    6.13   0
  -3  -5 -18    3.91    5.36   0
  -2  -7 -16    5.13    5.98   0
  -2  -2 -16   12.82    6.12   0
  -1  -8 -12   24.66    5.30   0
  -1   0 -13   16.85    3.79   0
   1  -4 -11    4.16    4.43   0
  -6  -8 -19    1.80    4.77   0
  -5  -7 -19   -3.93    4.43   0
  -4  -3 -18   -5.84    4.67   0
  -2  -9 -12    5.47    4.29   0
   0  -7 -10    1.01    4.20   0
   0  -5 -13    2.79    4.96   0
   1  -1 -10  105.56    3.55   0
  -6  -4 -19    1.23    3.73   0
  -5  -6 -19   11.67    5.31   0
  -5  -5 -19    4.13    4.54   0
  -4 -10 -14   32.96    4.56   0
  -4  -7 -18   52.14    5.46   0
  -3  -8 -16   22.32    5.53   0
  -1  -5 -15   27.95    6.75   0
  -1  -4 -15   23.76    6.50   0
  -1  -3 -15    2.15    5.97   0
   0  -7  -9   30.60    3.95   0
   0  -6 -12   75.50    5.56   0
   0  -1 -12  101.23    5.53   0
   0   0 -11  283.75    4.88   0
   1  -5  -9   71.59    4.16   0
  -6  -9 -18    5.51    4.04   0
  -4  -9 -16    4.64    4.95   0
  -4  -2 -17   10.42    3.77   0
  -2  -8 -14    9.86    5.70   0
  -2  -3 -16  126.33    7.63   0
  -1  -7 -13   43.55    6.69   0
   0  -4 -13    9.08    5.26   0
   0  -3 -13   59.00    5.52   0
   1  -2 -10  250.92    4.92   0
  -5  -9 -17   -0.10    4.62   0
  -5  -8 -18   16.65    4.80   0
  -5  -3 -18   -1.07    4.42   0
  -4  -6 -18   14.75    5.31   0
  -4  -4 -18   26.72    5.31   0
  -3  -9 -14   44.91    5.22   0
  -3  -6 -17    7.35    5.27   0
  -2  -4 -16   46.40    6.29   0
  -1  -6 -14   53.80    6.42   0
  -1  -2 -14   21.35    5.28   0
   0  -6 -11   23.04    5.18   0
   1  -3 -10   12.59    3.31   0
  -6  -7 -19   48.52    4.96   0
  -6  -5 -19   -3.61    3.92   0
  -5 -10 -15   10.89    5.01   0
  -3  -5 -17    6.45    5.21   0
  -3  -2 -16   44.13    5.75   0
  -1  -1 -13    2.30    4.64   0
  -1   0 -12   14.63    3.59   0
   0  -5 -12    3.93    4.98   0
   0  -2 -12    7.10    4.03   0
   1  -4  -9  635.50    6.07   0
  -6 -10 -16   32.65    4.92   0
  -6  -6 -19   43.08    4.61   0
  -6  -3 -18   20.97    3.69   0
  -5  -2 -17    0.70    3.31   0
  -2  -2 -15  124.92    6.62   0
  -1  -7 -12   60.26    5.87   0
  -1  -5 -14   -9.55    6.85   0
  -1  -3 -14   54.64    6.46   0
   0  -4 -12   78.45    5.24   0
  -7  -7 -19   31.06    4.64   0
  -7  -5 -19    6.78    3.25   0
  -5  -7 -18   17.55    4.91   0
  -5  -4 -18    7.54    5.93   0
  -4  -9 -15   -1.31    6.22   0
  -3  -9 -13    7.00    4.47   0
  -3  -8 -15    2.06    5.58   0
  -2  -6 -15   -0.01    5.85   0
  -1  -6 -13   26.66    5.02   0
  -1  -4 -14   11.28    6.90   0
   0  -3 -12   -0.85    4.10   0
  -7  -6 -19    0.37    3.97   0
  -6  -8 -18    5.12    4.72   0
  -2  -3 -15   30.08    5.48   0
   0  -6  -9   17.91    4.16   0
   0  -5 -11    1.29    3.98   0
  -6  -9 -17   59.41    5.36   0
  -5  -9 -16   97.56    5.87   0
  -5  -6 -18    3.61    5.02   0
  -5  -5 -18   21.77    5.17   0
  -4  -8 -16   20.51    5.63   0
  -3  -3 -16   36.97    6.22   0
  -2  -8 -12   -1.72    5.36   0
  -2  -4 -15   -0.83    5.67   0
  -1  -2 -13    7.12    4.91   0
   0  -2 -11    2.27    3.28   0
  -6  -4 -18   19.71    5.14   0
  -5  -8 -17    2.98    5.31   0
  -4  -2 -16   69.20    5.08   0
  -3  -4 -16   12.68    5.40   0
  -1  -5 -13   29.54    5.35   0
  -1  -1 -12   -1.24    3.73   0
   0  -6  -8   55.14    3.73   0
   0  -4 -11   13.76    3.61   0
  -8  -4 -18   -0.54    2.97   0
  -7 -10 -16    1.09    4.15   0
  -6 -10 -15    5.95    4.53   0
  -6  -7 -18    4.87    5.65   0
  -4  -9 -14   36.50    5.02   0
  -4  -5 -17   25.74    5.85   0
  -3  -5 -16    5.40    6.11   0
  -3  -2 -15    1.39    5.75   0
  -2  -7 -13    4.67    6.70   0
  -2  -6 -14   32.49    6.06   0
  -2  -2 -14    1.19    5.75   0
  -2   0 -12    6.96    3.44   0
  -1  -7 -10    4.13    4.22   0
  -1  -6 -12    3.83    5.40   0
  -1  -4 -13  111.82    6.80   0
  -1  -3 -13    1.85    5.18   0
  -7  -8 -18   -0.20    4.89   0
  -7  -4 -18    7.20    3.80   0
  -2  -8 -11   29.51    5.52   0
  -2  -1 -13   -4.18    4.48   0
  -1  -2  11  154.81    6.50   0
   0  -2  13   28.29    6.76   0
   1  -1  15   36.11    7.68   0
   1   3  12  125.03    5.54   0
   2  -5  13    1.20    6.45   0
   2   1  16   11.21    5.91   0
   3  -4  15    9.21    7.90   0
   3  -3  16    9.14    6.72   0
   3   3  16   34.91    7.09   0
   4  -5  14   11.12    5.18   0
   4   1  18   -1.88    6.73   0
   6   2  19   -3.00    4.46   0
   0  -1  13  208.57    8.48   0
   2  -3  15   -6.56    7.27   0
   3   1  17   -0.98    6.62   0
   4   4  16   -0.37    5.46   0
   5   4  17    1.02    4.88   0
   7   2  19   -3.02    4.12   0
   0  -5  10  120.49    6.38   0
   1   1  14    6.85    5.62   0
   1   2  13    1.93    5.52   0
   2  -4  14    2.42    7.20   0
   2   2  15  106.23    6.96   0
   2   3  14    5.80    5.13   0
   3   0  17    3.40    5.57   0
   5  -1  18   -0.04    5.44   0
  -1  -2  10    7.93    4.19   0
   0  -4  11   30.34    5.18   0
   0  -3  12    2.00    5.86   0
   0   0  12   13.09    5.09   0
   1  -2  14   62.44    8.01   0
   3   4  14    2.53    5.12   0
   4  -4  15   12.06    6.97   0
   5   2  18   22.95    6.90   0
   0  -2  12  156.79    7.26   0
   1  -1  14    4.26    7.68   0
   3  -5  13   86.07    7.27   0
   4  -3  16    1.83    6.11   0
   5   0  18    8.89    5.10   0
   6  -1  18    0.09    5.12   0
  -1  -3   9   54.96    4.23   0
  -1  -2   9    2.39    3.70   0
   1  -5  11   17.55    4.88   0
   1  -3  13    8.88    6.41   0
   2   1  15   16.02    5.55   0
   3   3  15  116.48    6.68   0
   4  -1  17   -1.99    6.27   0
   4   2  17   11.26    6.06   0
   5  -4  15    6.17    5.30   0
   5   1  18    9.31    5.56   0
   1   1  13    1.00    5.80   0
   2  -1  15   20.30    6.12   0
   2   0  15    8.42    6.35   0
   2   3  13    9.14    4.39   0
   3  -4  14   30.36    7.12   0
   3   1  16    4.36    6.70   0
   4   4  15    7.28    4.84   0
   6  -2  17   14.26    5.13   0
   6   4  17    3.08    4.95   0
   0  -4  10    4.63    4.83   0
   0   0  11  305.83    6.03   0
   2   2  14    3.68    4.99   0
   4  -5  13   14.81    5.47   0
   4   0  17    1.98    5.51   0
   4   3  16   48.32    6.03   0
   5   3  17   11.69    5.31   0
   6  -3  16    1.22    4.60   0
   6   0  18    3.73    5.05   0
   6   2  18    6.63    5.15   0
   7   3  18    1.46    4.90   0
   0  -2  11   39.85    5.30   0
   0  -1  11   15.12    4.71   0
   4  -2  16   10.63    6.30   0
   5  -5  13   -5.11    5.43   0
   6   1  18    6.01    4.50   0
   8   3  18   24.34    4.58   0
   0  -5   8    6.52    3.20   0
   1  -5  10    3.94    5.13   0
   1  -1  13    8.34    6.96   0
   2  -2  14    0.44    6.11   0
   3   2  15    0.38    5.66   0
   5  -1  17   11.89    5.89   0
   7   1  18    2.18    5.50   0
   7   2  18    7.66    5.14   0
   1  -4  11    9.43    6.08   0
   1  -3  12    4.57    5.92   0
   1   1  12   -3.76    4.70   0
   2   1  14   60.01    6.47   0
   3  -5  12    3.96    5.61   0
   3   3  14   24.82    4.91   0
   4  -4  14   24.39    6.05   0
   4  -3  15    0.22    6.13   0
   4   2  16   78.94    6.91   0
   5   0  17   18.83    7.48   0
   5   2  17   -2.38    5.44   0
   7   4  17    1.20    3.70   0
   8   1  18    4.23    4.00   0
   8   2  18   -3.50    3.54   0
   0  -4   9    4.98    4.14   0
   2  -3  13   -0.88    8.43   0
   2  -1  14   19.00    7.10   0
   2   0  14   11.45    5.82   0
   2   2  13   -8.16    4.81   0
   4  -1  16   10.92    5.91   0
   4   4  14   67.50    5.06   0
   5  -2  16   10.12    6.20   0
   5   1  17   12.49    6.32   0
   6  -1  17    8.32    5.54   0
   6   3  17    9.28    5.06   0
   0  -1  10  207.81    5.32   0
   1  -2  12   26.57    6.20   0
   2  -4  12   61.24    6.97   0
   3  -1  15   67.09    7.07   0
   3   0  15    7.52    6.10   0
   4   1  16   47.75    6.03   0
   4   3  15   18.74    5.55   0
   5  -4  14   14.10    6.64   0
   6  -4  14   -1.83    5.84   0
   7  -1  17   31.08    5.76   0
   8   4  17    5.32    3.73   0
   4  -5  12   28.82    6.35   0
   5  -3  15   13.82    6.52   0
   5   4  15   -1.76    4.21   0
   6  -2  16   12.07    5.85   0
   6   0  17   18.52    5.72   0
   6   2  17   33.25    6.57   0
   0  -4   8    5.15    3.37   0
   0  -3   9   22.60    3.54   0
   1   1  11  145.40    5.75   0
   2  -2  13    5.84    6.83   0
   2   1  13   -0.18    5.16   0
   3   2  14   43.97    5.45   0
   3   3  13    4.48    4.29   0
   4  -2  15   25.37    6.08   0
   6  -5  12    7.90    4.68   0
   6  -3  15    2.17    6.03   0
   7  -3  15    4.66    4.59   0
   7  -2  16   23.30    5.89   0
   7   3  17    5.63    5.21   0
   1  -4  10   -5.00    4.82   0
   2  -5  10   35.45    6.07   0
   3  -2  14   40.15    6.46   0
   5  -1  16   39.97    5.84   0
   7   0  17    4.04    5.68   0
   8   0  17    9.62    5.35   0
   1   0  11   11.80    4.43   0
   2  -1  13   -1.47    5.94   0
   2   0  13   29.54    5.94   0
   4  -4  13   37.25    6.47   0
   4  -3  14   14.07    6.64   0
   4   4  13    6.38    3.34   0
   7   1  17    6.70    5.48   0
   7   2  17   20.72    5.45   0
   7   4  16   11.23    4.61   0
   8   3  17   36.14    4.55   0
   9   1  17   -0.74    4.03   0
   9   3  17   -0.51    3.46   0
   1  -1  11   -0.54    4.13   0
   2  -4  11   16.66    5.79   0
   3  -4  12    5.69    6.45   0
   3  -3  13   55.67    6.82   0
   3  -1  14   -4.61    6.58   0
   3   0  14   -1.47    6.18   0
   3   1  14    0.10    5.03   0
   4   1  15    2.14    5.68   0
   4   3  14    9.85    4.99   0
   5  -2  15   11.27    6.78   0
   6  -1  16   21.32    6.52   0
   8   1  17    0.90    5.00   0
   8   2  17   14.34    5.82   0
   9   2  17   12.15    4.02   0
   4   0  15   88.14    7.09   0
   5  -4  13    2.79    5.89   0
   5   3  15    8.40    5.68   0
   5   4  14    7.48    4.38   0
   6   4  15   -2.86    5.33   0
   7  -4  13    3.72    4.46   0
   8  -3  14    2.04    5.14   0
   8  -1  16    5.95    5.35   0
   1  -4   9  305.61    7.20   0
   1  -3  10   97.29    6.00   0
   3   2  13    0.94    4.79   0
   4  -5  11    1.83    5.11   0
   5  -3  14    0.38    6.32   0
   6  -4  13   10.28    6.14   0
   6   0  16   12.78    6.65   0
   7  -1  16    5.70    5.56   0
   8  -2  15   -6.95    6.28   0
   8   4  16    4.76    4.00   0
   9   4  16   29.06    4.40   0
   2  -5   9    4.60    5.09   0
   2  -1  12   42.39    6.71   0
   2   0  12    3.60    5.05   0
   3  -2  13   24.01    6.02   0
   4  -2  14    4.73    6.28   0
   6  -3  14    2.20    6.31   0
   6  -2  15   17.24    6.54   0
   6   1  16   11.81    6.55   0
   7  -3  14   -9.58    6.78   0
   7  -2  15   10.19    7.01   0
   7   3  16    2.29    6.43   0
   9   0  16  -10.37    5.98   0
   1  -1  10    1.20    4.07   0
   2  -3  11    0.87    5.89   0
   3   1  13    0.38    5.06   0
   4  -3  13   17.01    7.36   0
   4   4  12   -0.34    2.57   0
   5  -5  11    3.93    5.49   0
   6  -5  11   10.97    6.42   0
   7   0  16    5.00    6.04   0
  10   3  16    9.17    3.70   0
   2  -4  10   52.24    5.80   0
   3  -4  11    0.16    6.81   0
   3  -3  12   10.77    5.98   0
   3  -1  13    6.62    6.11   0
   5   0  15    2.68    6.40   0
   5   1  15   -5.49    5.35   0
   8   0  16    7.13    5.55   0
   8   3  16    6.15    6.09   0
  10   2  16    2.29    3.95   0
   1  -4   8   34.63    4.09   0
   1  -3   9    4.65    3.97   0
   4   0  14   -0.88    5.97   0
   4   1  14    4.69    5.16   0
   5   3  14   -0.02    6.02   0
   6  -1  15    4.57    5.81   0
   7   1  16   15.27    6.42   0
   9  -2  14    5.45    5.84   0
   9  -1  15   -2.65    5.49   0
   9   1  16   12.79    5.16   0
   9   3  16    1.30    4.11   0
   2  -2  11   83.83    7.00   0
   3   2  12    6.05    4.12   0
   5  -4  12   -1.85    6.46   0
   6   4  14   29.62    5.05   0
   7  -4  12    3.91    6.93   0
   8   1  16    1.15    5.45   0
   8   2  16   57.88    6.79   0
   9   2  16    5.20    5.20   0
  10   0  15    4.94    4.39   0
   2  -5   8   13.73    4.21   0
   2  -1  11   27.52    5.15   0
   3  -5   9    6.23    6.56   0
   3  -2  12   -0.59    6.28   0
   4  -2  13   62.05    6.62   0
   6   2  15   28.27    6.97   0
   7  -5  10   -9.64    5.82   0
   7  -1  15   -1.57    6.97   0
   8  -3  13    9.90    5.69   0
   8  -1  15   -4.05    5.99   0
   8   4  15   58.76    5.45   0
  10   4  15   44.15    4.63   0
   2  -4   9   42.86    5.75   0
   4  -4  11   -8.64    8.03   0
   4  -3  12   14.68    7.40   0
   4   2  13    6.24    4.75   0
   5  -5  10   11.43    5.87   0
   5  -1  14    4.88    6.51   0
   5   2  14   27.60    6.63   0
   6  -3  13    1.63    6.52   0
   6   1  15    3.34    5.45   0
   8  -2  14    5.18    5.52   0
   9   4  15   -1.09    5.33   0
   3  -1  12   23.01    5.92   0
   4  -1  13    5.26    6.17   0
   4   3  12    8.80    3.87   0
   6  -5  10   -0.37    5.01   0
   7  -2  14    7.45    6.53   0
   7   0  15   -1.91    6.03   0
   9   0  15    0.45    5.43   0
  10   1  15   -0.84    5.76   0
   3   0  12   -8.18    3.76   0
   4   0  13    3.40    5.45   0
   4   1  13   27.67    5.84   0
   5   1  14   70.41    6.76   0
   8  -4  11    3.28    4.98   0
   8   0  15    4.09    6.34   0
   9  -3  12    4.95    4.64   0
  10   3  15    9.80    4.62   0
   4  -5   9   41.80    7.11   0
   5  -2  13    6.63    6.70   0
   5   4  12    6.19    3.48   0
   6   3  14    8.44    5.99   0
   8   3  15   -0.27    5.80   0
   9  -1  14    9.57    7.18   0
   9   3  15   13.23    6.34   0
  10   2  15   36.29    5.35   0
   2  -1  10   28.04    4.64   0
   3  -5   8    7.86    6.55   0
   3  -2  11    8.24    5.91   0
   4  -2  12    8.28    5.64   0
   6   4  13   58.31    5.16   0
   7  -4  11   14.46    7.87   0
   8   1  15   52.23    7.09   0
   8   2  15   12.03    6.41   0
   9  -2  13  -13.37    6.81   0
   9   1  15   47.26    6.43   0
   9   2  15    9.13    5.87   0
   2  -3   9  517.05    9.78   0
   4   2  12   96.14    5.64   0
   6   0  14   18.94    6.23   0
   6   2  14  109.19    7.06   0
   7  -5   9    3.62    6.04   0
   8  -3  12   24.22    7.65   0
   8  -1  14    3.91    6.77   0
  10  -2  12   -3.11    6.10   0
  10   0  14   -4.01    5.88   0
  11   2  14   29.44    4.19   0
  11   3  14   -0.95    3.58   0
   3  -4   9   -2.46    6.51   0
   3  -1  11    5.91    5.59   0
   3   1  11   21.98    4.69   0
   4  -3  11   64.60    7.14   0
   5  -1  13   -6.05    7.13   0
   6   1  14   -0.33    5.83   0
   7  -3  12   45.59    8.25   0
   7   3  14    1.47    6.28   0
   8  -2  13    4.53    6.85   0
   9   4  14   35.88    6.08   0
  10  -1  13    2.70    5.89   0
  10   4  14   15.14    4.32   0
   3   0  11   36.02    4.91   0
   4  -1  12    7.20    5.96   0
   5   0  13   50.22    6.42   0
   9   0  14   14.02    6.28   0
   4   0  12   31.04    5.64   0
   5  -2  12   12.34    6.91   0
   5   3  12   27.58    5.41   0
   6   3  13    1.43    5.48   0
   7   1  14   42.76    7.08   0
   8  -4  10    8.92    6.19   0
   8   0  14   22.66    6.28   0
   9  -3  11   -3.97    5.87   0
  10   1  14   43.49    5.56   0
  10   3  14    5.64    6.66   0
   4  -5   8    1.99    6.04   0
   5  -4  10    8.73    7.17   0
   5  -3  11   11.11    6.39   0
   6  -1  13   18.19    7.26   0
   9  -4   9    8.16    5.24   0
   9   3  14    2.75    6.94   0
  10   2  14   18.36    6.30   0
  11   4  13    8.72    4.04   0
   3  -2  10    0.54    5.40   0
   4  -2  11    0.50    6.31   0
   7  -4  10   72.89    7.39   0
   9  -2  12   -0.69    6.17   0
   9   2  14   -5.91    6.46   0
  11   1  13   23.70    5.46   0
   3  -3   9  142.50    8.91   0
   4  -4   9   50.67    7.34   0
   4  -3  10  175.98    8.52   0
   4   2  11    1.24    3.95   0
   5  -1  12   42.77    7.31   0
   6  -3  11  101.57    9.35   0
   6  -2  12    6.80    7.19   0
   6   0  13   -3.43    7.42   0
   6   1  13  290.95    8.78   0
   6   2  13    9.93    5.91   0
   7  -5   8   17.34    4.98   0
   8   4  13   30.80    5.81   0
  10  -2  11   -0.68    6.14   0
  10   0  13   17.00    6.16   0
  11   2  13    1.61    5.99   0
  11   3  13    2.45    5.69   0
   3  -1  10   -2.17    4.41   0
   4  -1  11   67.74    6.17   0
   5   2  12   48.63    5.95   0
   6  -5   8   -1.20    5.19   0
   7  -3  11   61.21    7.90   0
  10  -1  12    3.40    6.84   0
  10   4  13   12.14    5.14   0
  11  -1  11    4.74    5.20   0
  11   0  12    1.48    6.19   0
   4   0  11  147.36    6.70   0
   4   1  11  226.71    6.97   0
   5   1  12   28.28    6.08   0
   7   0  13   -0.77    7.34   0
   8  -4   9    9.19    9.03   0
   9   0  13    2.91    7.39   0
  10  -3   9   25.39    6.62   0
   4  -5   7    5.65    6.09   0
   5  -4   9   14.89    7.81   0
   5  -2  11    2.37    6.73   0
   5   3  11    2.61    4.14   0
   6  -1  12   25.52    7.96   0
   6   3  12   79.76    6.36   0
   7   1  13    4.02    6.80   0
   8   3  13   41.72    8.51   0
   9  -4   8  -13.72    6.31   0
   9  -3  10   -0.15    6.99   0
  10   1  13   -0.82    6.47   0
  10   3  13   -3.24    7.62   0
   3  -2   9   54.77    6.07   0
   4  -2  10   40.36    6.42   0
   5  -3  10   22.69    6.86   0
   6   4  11   -4.24    4.43   0
   7  -4   9   -3.21    8.13   0
   9  -2  11    5.99    7.26   0
   9  -1  12   -3.08    7.81   0
  10   2  13   -8.02    6.12   0
  11   1  12   -0.72    7.17   0
  11   4  12   15.82    5.77   0
  12   4  11    9.08    4.29   0
   5  -5   7   80.26    8.13   0
   6  -4   9   91.17    8.53   0
   6  -2  11   29.70    7.58   0
   6   0  12   80.02    7.29   0
   6   2  12    5.13    5.91   0
   8  -3  10   63.46    9.01   0
  10   0  12    3.56    8.03   0
   3  -4   7    2.65    4.52   0
   3  -3   8  248.57    7.80   0
   5  -1  11   23.94    6.51   0
   5   2  11   50.65    5.37   0
   6  -3  10   84.14    8.57   0
   6   1  12   84.71    7.37   0
   7  -2  11   31.61    9.27   0
   8  -2  11   31.91    8.09   0
   8   4  12    8.69    6.33   0
  10  -2  10   12.19    7.45   0
  11  -1  10   -1.06    7.62   0
  11   0  11   -0.91    7.59   0
  11   2  12   13.26    5.65   0
  11   3  12   18.15    5.74   0
  12   2  11   11.33    4.61   0
  12   3  11   -5.61    4.18   0
   4  -1  10  140.27    6.36   0
   5   0  11   21.59    5.79   0
   7   3  12    5.76    5.85   0
  10  -3   8    0.73    7.16   0
  10   4  12   33.72    6.71   0
   4  -5   6   86.30    6.23   0
   4   0  10   75.97    5.28   0
   5  -4   8    8.02    8.44   0
   5  -2  10   -0.94    6.77   0
   5   1  11   96.21    6.83   0
   7   0  12   -1.61    8.04   0
   8  -4   8   14.55    7.29   0
   9  -4   7   13.20    8.23   0
   9  -3   9    8.60    7.68   0
  10   1  12   10.32    7.42   0
   5  -3   9   -2.65    6.69   0
   6   3  11   93.80    5.68   0
   7   1  12  228.35    8.89   0
   7   2  12   11.03    6.49   0
   7   4  11    7.27    5.72   0
   8   3  12   14.72    6.71   0
  10   2  12    9.54    8.89   0
  10   3  12    7.82    7.07   0
  11  -2   8   -2.27    5.82   0
  12   0   9    7.55    5.83   0
  12   1  10    1.77    5.21   0
  12   4  10    2.26    4.93   0
   4  -2   9   14.41    6.25   0
   7  -5   6    8.87    5.75   0
   7  -1  11    1.23    8.26   0
   8   2  12    9.06    8.53   0
   9  -2  10   -4.10    7.95   0
   9  -1  11   -1.42    7.02   0
   9   3  12   10.40    7.21   0
  11   1  11    0.29    6.21   0
  11   4  11   32.49    6.31   0
   6  -5   6   89.84    8.67   0
   6  -2  10    3.95    6.70   0
   6   2  11    9.62    6.15   0
   8  -5   5    1.60    5.51   0
   8  -3   9    5.11    7.76   0
  10  -2   9   16.88    6.74   0
  10   0  11   10.74    8.25   0
  11  -1   9   -2.48    8.34   0
  12   2  10    7.12    5.99   0
  12   3  10   13.58    6.23   0
   6   1  11   20.39    6.47   0
   7  -3   9   -0.05    8.77   0
   7  -2  10   27.15    7.08   0
  10  -3   7    1.13    7.25   0
  10  -1  10   11.21    8.04   0
  11   0  10   -5.18    7.24   0
  11   2  11    1.74    7.02   0
  11   3  11   42.09    6.61   0
   4  -1   9   27.26    4.96   0
   5   0  10   24.30    5.92   0
   7   0  11   -7.27    7.56   0
   7   3  11   27.05    5.66   0
   8  -4   7   -3.77    7.11   0
   9  -4   6   16.66    7.71   0
   9  -3   8   -3.33    8.16   0
   9   4  11   30.33    7.62   0
  11  -2   7    0.54    6.51   0
  12   1   9   -0.32    7.41   0
   5  -4   7   12.36    7.45   0
   5  -2   9   63.43    7.20   0
   5   1  10   89.68    5.97   0
   6  -1  10   19.91    7.16   0
   8   0  11    4.36    7.64   0
  10   1  11    2.79    8.72   0
  12   0   8   17.68    6.37   0
   5  -3   8   45.48    7.48   0
   6   3  10    5.08    4.75   0
   7  -5   5   19.97    6.32   0
   7   1  11   33.13    7.49   0
   7   4  10   17.42    5.82   0
   8  -5   4   -2.54    6.92   0
   8   3  11   39.04    6.53   0
   9  -2   9   32.43    8.84   0
  10   2  11   12.92    8.39   0
  11   1  10   16.41    7.93   0
  12   4   9    8.44    4.88   0
   4  -2   8    6.92    5.40   0
   5  -5   5  155.13    8.23   0
   6  -5   5   50.64    8.75   0
   6  -2   9   38.66    7.71   0
   7  -1  10   17.36    8.20   0
   8  -1  10   19.14    8.52   0
   8   2  11    6.96    7.43   0
   9   2  11    5.39    8.28   0
   9   3  11    9.37    7.58   0
  10  -3   6   18.46    9.21   0
  10  -2   8   15.03    8.83   0
  11   0   9   40.67    7.65   0
  12   2   9    4.88    6.33   0
  12   3   9   -0.97    6.94   0
   4  -4   6   27.04    6.10   0
   4  -3   7   35.97    6.09   0
   5  -1   9    6.90    5.29   0
   6  -3   8   26.04    7.72   0
   6   0  10   26.20    7.11   0
   6   2  10   18.49    5.87   0
   7  -3   8   30.37    9.05   0
   8  -4   6   11.00    8.77   0
   8  -2   9   20.75    8.25   0
  11  -2   6   44.42    8.67   0
  11   2  10   14.54    7.62   0
  11   3  10   21.99    7.96   0
   6   1  10    8.75    6.44   0
   8   4  10   -4.36    6.18   0
   9  -3   7    6.26    8.70   0
  12   0   7    4.62    7.40   0
  12   1   8    3.57    7.53   0
   5  -4   6  134.07    9.57   0
   5   0   9    0.15    4.92   0
   7   3  10  258.62    8.80   0
   9   4  10   10.17    6.54   0
  10   1  10   17.84    7.93   0
  12   4   8    0.04    6.46   0
   5  -2   8    7.74    6.77   0
   6  -4   6   33.72    9.64   0
   6  -1   9    3.52    6.50   0
   7  -4   6    9.67    8.27   0
   7   1  10    7.75    7.25   0
   9  -2   8   10.94    9.04   0
  10  -3   5   49.49   10.04   0
  10  -2   7    3.08    8.74   0
  11  -1   7   22.58    8.38   0
  11   1   9   -8.87    8.21   0
  12   2   8   21.03    7.04   0
   5  -5   4  172.39    8.86   0
   5  -3   7   68.39    7.18   0
   8   1  10    7.29    7.22   0
   8   3  10    7.08    6.46   0
   9   1  10   10.71    8.70   0
   9   3  10  192.95    9.62   0
  10  -1   8    8.74    9.13   0
  10   0   9    4.57    8.16   0
  11  -2   5   21.70    7.90   0
  11   0   8   15.78    8.84   0
  12   3   8   12.47    6.33   0
   4  -4   5   28.82    7.07   0
   6  -3   7   10.39    7.65   0
   6  -2   8    3.77    7.20   0
   7  -3   7    0.55    8.37   0
   7  -1   9   14.98    8.24   0
   8  -4   5   13.89    8.11   0
   8  -2   8  208.68   10.21   0
   8   2  10    9.43    7.80   0
   9  -3   6   12.12    8.39   0
   9   2  10   -1.86    7.48   0
  11   2   9   25.19    8.45   0
  11   3   9    7.87    8.69   0
  12   0   6    1.10    6.99   0
  12   1   7   33.65    7.78   0
   5  -1   8    6.98    5.16   0
   9   0   9   47.11    9.62   0
   6   1   9   26.41    5.55   0
   6   2   9   50.56    5.32   0
   8   4   9   -4.85    7.07   0
  10  -3   4   -4.28    8.45   0
  10  -2   6   -2.06    9.10   0
  11  -2   4   36.20    9.82   0
  11   1   8   -5.04    8.71   0
  12   2   7   20.60    6.69   0
  12   4   7   35.89    6.15   0
   5  -4   5   76.26    7.51   0
   7  -4   5   68.08    8.84   0
   7   3   9  191.00    7.40   0
   8  -3   6    9.37   11.64   0
   8   0   9   24.82    9.24   0
   9  -4   3   11.96    8.17   0
   9   4   9   16.61    7.08   0
  11   4   8   14.91    7.21   0
  12   0   5   14.70    7.53   0
  12   3   7    6.00    6.81   0
   5  -3   6   -5.10    6.31   0
   6  -5   3    5.67    8.30   0
   6  -4   5   68.56    8.49   0
   7   1   9  100.26    8.08   0
   9  -3   5    5.27    8.25   0
   9   1   9    1.75    8.01   0
  10  -1   7   -1.19    8.05   0
  11   2   8   11.74    9.11   0
  12   1   6    7.21    6.90   0
   7  -3   6   10.25    8.65   0
   7  -1   8   19.98    7.75   0
   7   2   9  113.96    8.22   0
   8  -2   7   62.68    8.94   0
   8  -1   8   98.87   10.35   0
   8   1   9   -3.49    8.18   0
   8   3   9   62.04    7.14   0
   9   3   9    2.32    7.55   0
  11  -2   3   32.15    9.64   0
  11   3   8   21.73    8.71   0
  12   4   6   18.27    7.69   0
   6  -3   6   77.86    8.81   0
   7  -2   7    2.88    8.19   0
   8   2   9   64.47    8.25   0
   9  -4   2   33.86   10.03   0
  10  -3   3    7.27    8.65   0
  10  -2   5   14.45    9.43   0
  11  -1   5   44.26    9.70   0
  12   0   4   21.72    7.66   0
  12   2   6   80.32    7.68   0
   6   0   8  172.96    7.80   0
   7  -4   4   -7.18   10.23   0
   9   0   8  -18.39    9.60   0
  10   4   8   41.15    7.86   0
  11   0   6   42.78    9.92   0
  12   1   5   46.90    7.81   0
  12   3   6    3.04    6.80   0
   7   0   8   81.65    8.86   0
   8  -3   5    2.97    9.96   0
   9  -3   4    8.00   10.02   0
   9   4   8   15.67    8.79   0
  10  -1   6    8.72    8.95   0
  10   2   8   53.93   10.35   0
  10   3   8   16.87    9.33   0
  11  -2   2    7.88    8.44   0
  11   2   7  -13.02   11.36   0
  11   4   7  112.52    9.48   0
   6  -5   2   -2.27    6.56   0
   6  -4   4   35.56    7.81   0
   8   4   8   25.38    5.86   0
   9   1   8   50.97    9.92   0
  11  -1   4   -4.71    9.18   0
  11   3   7   30.20    9.30   0
  11   5   6   -1.69    4.82   0
  12   0   3    6.63    7.81   0
  12   2   5   -2.68    8.76   0
  12   4   5    1.72    8.09   0
   5  -3   5    2.09    5.64   0
   6  -1   7  180.30    7.13   0
   7  -3   5    7.49    8.75   0
   7   1   8  118.05    8.20   0
   7   3   8  169.83    7.38   0
   8  -2   6    8.10    8.48   0
   8  -1   7   -0.46    8.27   0
   8   1   8   38.13    8.61   0
   9   3   8   23.99    7.87   0
  11  -2   1    5.50    9.61   0
  12   1   4   -3.94    7.64   0
  12   3   5    2.62    8.14   0
   6  -3   5  126.18    9.03   0
   7  -2   6   43.13    8.31   0
   7  -1   7  149.38    8.80   0
   8   2   8    2.11    8.12   0
   8   3   8    6.03    7.38   0
  10   1   7   17.46    9.19   0
  11   0   5   34.79   10.62   0
  11   1   6   63.51   10.82   0
  12   0   2   21.64    8.15   0
   6  -2   6  201.95    8.00   0
   7  -4   3   -3.47    8.70   0
   9  -4   0   13.73    9.62   0
   9  -1   6   -5.77    9.53   0
  10  -1   5    7.24    9.42   0
  11  -2   0   58.87    7.90   0
  11   4   6  -12.71    8.33   0
  12   4   4   20.25    8.28   0
   6   0   7   32.02    5.27   0
   8  -3   4   81.11   10.70   0
   8   0   7    9.90    8.83   0
  10  -3   0   56.09   10.37   0
  10  -2   3   47.06   11.95   0
  10   2   7   17.32   10.15   0
  10   3   7   21.68    9.22   0
  11   2   6    1.39    9.91   0
  11   3   6  117.66   10.16   0
  11   5   5   -1.94    6.99   0
  12   0   1   43.23    8.08   0
  12   2   4   -6.03    7.39   0
  12   3   4  -18.29    8.32   0
   5  -4   3   60.12    8.25   0
   6  -4   3   59.36    7.80   0
   9   1   7   25.70    9.24   0
  11   1   5   -3.30   10.25   0
   7  -3   4   75.41    9.82   0
   8  -1   6   45.47    9.27   0
  10   1   6    7.72    9.70   0
  11  -1   2   68.57    9.88   0
  12   4   3  123.87    9.02   0
   5  -3   4   81.26    6.82   0
   6  -1   6    5.74    5.91   0
   7  -1   6  145.98    8.65   0
   7   1   7   -1.42    6.32   0
   7   3   7   64.46    6.00   0
   8   1   7    7.82    8.13   0
   9  -4  -2    4.00    9.93   0
   9  -3   2   41.59    9.71   0
   9   0   6   88.28   10.94   0
   9   2   7   41.53    9.20   0
   9   3   7    3.11    8.22   0
  10  -3  -2   67.09    9.59   0
  10  -1   4   47.18   10.15   0
  11   2   5   -6.66   12.27   0
  11   4   5    4.14    9.34   0
  12   3   3   42.76    7.27   0
   6  -3   4   37.31    7.86   0
   6  -2   5   -0.61    7.02   0
   7   2   7  199.78    8.67   0
   8  -3   3   -0.12   10.14   0
   8   2   7    0.32    8.07   0
   9  -4  -3   19.45    9.16   0
   9  -1   5  186.34   10.32   0
  10  -3  -3   -0.18    6.96   0
  10  -2   2   10.91    9.88   0
  10   2   6   10.32   10.28   0
  10   4   6   21.35    8.79   0
  11  -1   1   92.54   12.12   0
  11   0   3   52.14   10.72   0
  11   3   5   -0.16    8.56   0
  11   5   4   41.02    6.13   0
  12   1   1   22.99    8.55   0
  12   4   2    5.07    7.54   0
  10   3   6   -2.61    9.32   0
  11   1   4    6.60   10.39   0
  12   3   2  111.94    9.18   0
   6  -4   2    8.02    7.46   0
   8  -2   4   -3.90    7.55   0
   9  -3   1   45.68   10.13   0
   9   1   6  136.23    9.54   0
  10  -1   3   -1.03    9.80   0
  11  -1   0    5.66   10.29   0
  12   1  -1   40.52    7.67   0
  12   2   1   38.24    9.72   0
  12   4   1   26.05    6.95   0
   5  -4   2   21.43    6.71   0
   7  -3   3  104.66   10.25   0
   7   0   6    9.03    7.16   0
   9   4   6   36.42    8.33   0
  10   1   5   43.84    9.49   0
  11   0   2   28.46   10.32   0
  11   2   4    1.96   11.32   0
  11   4   4    9.87    7.76   0
  11   5   3    7.42    7.66   0
  12   3   1   15.57    8.65   0
  12   4   0   46.15    6.64   0
   7  -4   1    7.55    8.88   0
   8  -3   2  168.61   11.44   0
   8   1   6   51.82    8.43   0
   9  -1   4   55.05   10.40   0
   9   0   5   79.47   11.21   0
   9   2   6   15.27    8.72   0
   9   3   6    1.16    7.79   0
  10   4   5   46.06    9.48   0
  11  -1  -1   38.05    9.96   0
  11   1   3   13.75   11.24   0
  11   3   4    3.28    8.46   0
  12   2   0   21.25    7.46   0
   6  -3   3    7.30    7.33   0
   7  -2   4    8.06    8.51   0
   7   1   6   39.05    6.09   0
   8  -4  -1   65.59    9.15   0
   9  -3   0   -1.81   10.11   0
  10  -2   0   21.83   10.57   0
  10   2   5  101.31   10.28   0
  10   3   5  -10.93   10.01   0
  11  -1  -3   -2.91    8.35   0
  11  -1  -2   -0.22    8.83   0
  12   2  -1   28.15    7.06   0
  12   3  -1   11.96    7.35   0
  12   3   0   34.59    6.71   0
   6  -2   4   39.11    7.39   0
   8   2   6  250.70    9.70   0
  10  -1   2   -0.47    9.51   0
  10   5   4    9.90    6.93   0
  11   2   3   17.97   10.61   0
  11   4   3   -2.17    9.35   0
  11   5   2   15.36    8.01   0
   6  -4   1   90.01    8.07   0
   8  -1   4    7.76    9.22   0
   8   0   5   68.69    9.17   0
   9  -3  -1   19.76   10.71   0
   9   1   5  182.79   11.32   0
  10  -2  -1  103.09   10.89   0
  10   1   4   87.13   11.62   0
  11   1   2   63.11   11.24   0
  11   3   3   35.42    8.88   0
   8  -3   1   40.39   10.41   0
   9  -1   3   14.37   10.04   0
   9   0   4   47.05   10.11   0
   7   0   5    2.82    6.42   0
   9   2   5   12.45    9.01   0
   9   3   5   55.72    9.39   0
  10  -2  -5    7.41    8.90   0
  10  -2  -3   14.04   12.19   0
  10   2   4   21.75    8.80   0
  10   3   4   18.60   10.30   0
  11   0  -1    9.67    9.80   0
  11   1   1   12.28   10.30   0
  11   2   2    6.05   10.53   0
  11   4   2   27.36    9.93   0
  11   5   1   78.69    6.84   0
   6  -3   2   -0.28    6.99   0
   8  -4  -3   27.52    9.97   0
   8   4   5  286.06    8.69   0
  10  -2  -4   42.29   10.06   0
  10   1   3  145.86   11.85   0
  10   5   3   -2.88    7.32   0
  11   0  -4   45.65   10.63   0
  11   0  -2   28.62    9.78   0
  11   3   2   30.90    9.20   0
   7  -4  -1  121.88   10.51   0
   7   1   5  327.50    8.55   0
   8  -3   0   14.73   10.49   0
   8  -2   2   -0.51    8.14   0
   8   2   5  363.80   10.27   0
   9   1   4  -14.93    9.95   0
  11   0  -3   27.52    9.28   0
   6  -4   0   -4.08    8.11   0
   6  -2   3    2.45    6.76   0
   7  -3   1   45.61    9.69   0
   8  -4  -7   -0.30    8.05   0
   8  -4  -5   37.63   10.98   0
   8  -1   3   16.69    8.74   0
   8   0   4    5.50    8.92   0
   8   3   5    7.89    7.31   0
   9  -3  -6   60.17    8.91   0
   9  -3  -5   37.89   11.54   0
   9  -3  -4    7.27   10.52   0
   9   0   3    7.82    9.94   0
  10   2   3   16.33    9.83   0
  11   2   1   16.30   10.59   0
  11   3   1  179.00   12.30   0
  11   4   1   -3.52    9.38   0
  11   5  -1   40.37    6.67   0
   8  -4  -6   64.38    9.77   0
   9   2   4   52.69    9.13   0
   9   4   4   24.08    8.12   0
  10  -1  -1   13.18   11.35   0
  10   3   3  200.67   12.21   0
  11   1  -1   -1.97   10.27   0
   8  -3  -1    9.68   10.62   0
   9   3   4  194.62   10.54   0
  11   1  -4  101.69   11.07   0
  11   1  -2   -1.58    8.91   0
  11   2   0   25.20   10.09   0
  11   4   0    0.51    8.75   0
   7  -2   2   46.43    9.03   0
   7  -1   3  418.89    9.99   0
   8  -2   1   13.51    8.67   0
  10  -1  -2   17.56   11.05   0
  11   1  -3   79.03    9.02   0
  11   2  -1   46.92    9.58   0
  11   3   0   56.33   10.19   0
  11   4  -4   27.00    6.51   0
  11   4  -1    4.39    9.62   0
   6  -4  -1   11.97    7.61   0
   7  -3   0    9.26    8.85   0
   8  -1   2   97.32    8.89   0
   8   0   3  446.39   11.07   0
   8   4   4  222.98    7.85   0
   9   0   2    5.88    9.15   0
  10  -1  -6   13.50    8.00   0
  10  -1  -3   16.31   11.04   0
  10   2   2   92.07    9.72   0
  10   4   2   -2.12    8.58   0
  11   2  -5    9.43    7.42   0
  11   2  -2   88.07    8.82   0
  11   4  -3  132.70    7.81   0
  11   4  -2   21.84    6.96   0
   7  -4  -3   11.00    8.13   0
   7   1   4   44.09    5.59   0
   8   2   4   21.24    8.22   0
   8   3   4    2.89    5.83   0
   9   2   3    0.75    7.56   0
  10  -1  -4   28.82    9.68   0
  11   2  -4   18.76    8.01   0
  11   2  -3   52.74    8.19   0
  11   3  -4   60.00    6.91   0
  11   3  -2   35.81    7.65   0
  -8  -6 -18    7.81    4.06   0
  -7  -4 -17    7.42    4.98   0
  -7  -3 -16    3.53    5.06   0
  -6  -7 -18   -2.45    5.36   0
  -6  -6 -18   49.06    5.58   0
  -6  -4 -17   11.16    5.41   0
  -6  -2 -15   30.24    4.95   0
  -5  -3 -16   20.96    7.86   0
  -5  -2 -15    1.41    5.65   0
  -4  -6 -17   41.92    5.76   0
  -3  -5 -16    7.32    6.42   0
  -3  -1 -13   -1.71    5.20   0
  -2  -6 -15   -2.84    6.61   0
  -2  -5 -15    3.54    5.17   0
  -1  -3 -13   13.05    5.60   0
  -7  -8 -18   -0.62    5.86   0
  -7  -6 -18   36.93    4.39   0
  -3  -3 -15  165.07    7.33   0
  -2  -1 -12   33.15    5.10   0
  -1  -2 -12   66.02    5.21   0
   0  -3 -11  149.71    5.31   0
  -8  -8 -18   -1.10    4.52   0
  -8  -7 -18    1.00    4.40   0
  -7  -7 -18   19.19    4.50   0
  -5  -5 -17    7.48    5.67   0
  -4  -4 -16    0.17    6.09   0
  -3  -8 -15    7.46    5.08   0
  -2  -2 -13   -3.16    5.24   0
  -1  -6 -13   22.16    6.97   0
  -1  -4 -13  126.58    7.14   0
   0  -5 -11    1.37    5.24   0
  -8  -5 -17    1.15    4.90   0
  -6  -9 -17   67.76    5.77   0
  -5  -6 -17   16.48    6.78   0
  -5  -1 -13   49.69    4.79   0
  -4 -10 -14   21.71    4.91   0
  -4   0 -11  142.54    4.26   0
  -2  -7 -14   16.89    6.05   0
  -1  -7 -12   54.46    6.09   0
  -1  -5 -13   34.07    6.63   0
   0  -4 -11   12.75    4.17   0
  -9  -6 -17   21.26    3.99   0
  -8  -4 -16    2.94    4.55   0
  -7  -5 -17   -2.82    4.89   0
  -7  -2 -14    0.34    3.02   0
  -6 -10 -16   40.62    5.64   0
  -5  -7 -17   52.92    6.26   0
  -4  -5 -16   48.71    6.95   0
  -4  -3 -15    6.24    5.28   0
  -4  -2 -14   18.05    5.19   0
  -3  -4 -15    8.45    6.40   0
  -2  -4 -14    8.35    5.99   0
 -10  -6 -16    6.95    3.23   0
  -5 -10 -15    0.92    4.75   0
  -5  -9 -16  102.16    6.67   0
  -5  -4 -16    5.40    5.29   0
  -4  -9 -15    5.17    5.43   0
  -4  -7 -16    7.68    6.11   0
  -3  -5 -15    9.85    5.46   0
  -2  -6 -14   40.13    6.36   0
  -2  -5 -14   21.11    5.20   0
  -1  -3 -12   89.47    4.25   0
  -9  -5 -16    5.48    4.75   0
  -7  -9 -17   19.61    5.89   0
  -6  -8 -17    1.00    5.72   0
  -6  -6 -17    9.69    6.52   0
  -5  -3 -15    3.01    5.56   0
  -5  -2 -14   34.23    4.69   0
  -3  -6 -15   51.26    5.96   0
  -3  -3 -14   12.06    5.11   0
  -3  -2 -13    2.13    4.78   0
  -2  -3 -13    7.22    5.90   0
  -2  -1 -11  220.43    4.85   0
  -1  -6 -12    2.86    5.62   0
  -1  -2 -11   -1.19    3.58   0
  -9  -8 -17   13.52    4.79   0
  -9  -7 -17    4.18    4.16   0
  -8  -9 -17    2.50    4.97   0
  -8  -6 -17    5.11    4.83   0
  -7  -6 -17    9.71    5.60   0
  -6  -7 -17    3.72    6.30   0
  -6  -3 -15   17.41    5.52   0
  -2  -2 -12   28.02    4.44   0
  -1  -4 -12   18.83    5.68   0
   0  -5 -10  108.17    4.86   0
   0  -4 -10    1.18    3.44   0
  -8  -7 -17    4.08    5.08   0
  -7 -10 -16    3.58    4.98   0
  -7  -8 -17   28.34    5.47   0
  -7  -7 -17    0.34    5.36   0
  -6 -11 -14   26.52    4.51   0
  -5  -8 -16    0.35    5.98   0
  -4  -4 -15   12.09    6.19   0
  -4  -1 -12  157.73    5.49   0
  -3  -9 -13    7.17    4.14   0
  -1  -7 -11    0.87    4.91   0
 -10  -7 -16    2.91    3.89   0
  -8  -8 -17   27.46    5.14   0
  -8  -5 -16   38.97    6.84   0
  -6  -9 -16    0.35    5.63   0
  -5  -7 -16    0.32    6.64   0
  -4 -10 -13    3.05    4.70   0
  -4  -8 -15    6.68    5.36   0
  -4  -3 -14   14.46    5.60   0
  -4  -2 -13   11.08    5.19   0
  -2  -8 -12    1.66    4.84   0
  -2  -4 -13   71.41    6.17   0
  -1  -3 -11    4.02    3.55   0
  -8 -10 -16    2.25    4.56   0
  -7  -5 -16   13.59    7.06   0
  -5  -4 -15    3.78    6.63   0
  -4  -9 -14   34.02    5.89   0
  -4  -5 -15   80.54    6.36   0
  -3  -7 -14   15.55    6.53   0
  -3  -1 -11   25.37    3.54   0
  -2  -6 -13    1.33    5.74   0
  -2  -5 -13  102.25    6.60   0
 -10  -8 -16   -3.79    3.28   0
  -9  -6 -16   49.37    5.25   0
  -8  -4 -15   83.09    5.33   0
  -5 -10 -14   -0.35    5.13   0
  -5  -9 -15   53.01    6.30   0
  -5  -2 -13   63.88    5.21   0
  -4  -6 -15   -1.87    5.71   0
  -3  -6 -14   21.58    4.97   0
  -3  -5 -14   36.34    5.42   0
  -3  -3 -13    3.31    4.83   0
  -2  -3 -12    7.89    5.19   0
  -1  -6 -11    6.01    4.98   0
  -7  -9 -16   50.36    6.14   0
  -7  -3 -14    1.94    4.75   0
  -6  -8 -16   28.73    6.18   0
  -6  -4 -15   -1.86    5.86   0
  -6  -2 -13    6.89    4.35   0
 -10  -6 -15    3.57    3.65   0
  -9  -9 -16   13.69    5.22   0
  -9  -7 -16   23.77    5.43   0
  -9  -5 -15   25.82    4.94   0
  -9  -4 -14   25.72    4.60   0
  -8  -9 -16   26.61    6.59   0
  -8  -6 -16   28.59    5.86   0
  -7 -11 -14    8.24    5.23   0
  -7  -6 -16   -5.49    6.39   0
  -6  -7 -16    5.06    5.49   0
  -6  -3 -14    0.57    5.19   0
  -5  -5 -15   13.90    6.00   0
  -4  -4 -14  104.77    6.54   0
  -3  -8 -13   11.51    5.61   0
  -1  -7 -10   -2.16    4.10   0
 -10  -5 -14   -0.51    3.91   0
  -9  -8 -16   28.06    5.14   0
  -7 -10 -15    9.70    5.98   0
  -7  -8 -16   28.30    6.17   0
  -7  -7 -16   24.52    5.70   0
  -6 -11 -13   39.34    5.45   0
  -5  -8 -15   80.19    7.16   0
  -5  -1 -11  106.35    4.53   0
  -4 -10 -12    4.67    4.69   0
  -3  -4 -13   29.94    5.55   0
  -2  -8 -11   30.64    4.76   0
  -2  -4 -12  230.96    6.61   0
  -8  -8 -16   -3.44    5.48   0
  -8  -7 -16    6.56    5.46   0
  -6  -9 -15  110.42    6.81   0
  -5  -6 -15   16.94    5.74   0
  -4  -5 -14    9.47    6.16   0
  -4  -3 -13   28.27    5.17   0
  -4  -2 -12  117.93    5.51   0
  -2  -6 -12   44.00    6.32   0
  -2  -5 -12   48.21    5.83   0
 -11  -7 -14   23.37    3.88   0
 -10  -7 -15   14.93    4.81   0
  -9 -10 -15   -3.77    4.74   0
  -8 -11 -14   19.77    4.06   0
  -8 -10 -15    2.09    5.85   0
  -8  -5 -15   76.80    6.33   0
  -8  -3 -13   28.86    4.60   0
  -6 -10 -14   10.28    6.72   0
  -6  -5 -15   38.41    6.21   0
  -3  -7 -13   13.66    5.60   0
  -3  -5 -13  293.94    7.71   0
  -3  -3 -12   58.33    4.67   0
  -2  -3 -11  127.60    5.32   0
  -1  -6 -10   31.72    4.72   0
 -10  -9 -15    0.76    4.04   0
 -10  -8 -15   14.51    5.01   0
  -6  -2 -12    1.07    4.40   0
  -5 -10 -13    5.19    5.15   0
  -5  -2 -12   62.81    4.81   0
  -4  -6 -14   12.04    6.08   0
  -3  -6 -13   16.74    5.09   0
 -11  -8 -14    1.74    3.67   0
  -7  -9 -15   27.64    6.09   0
  -7  -4 -14   28.51    5.53   0
  -7  -3 -13   -8.13    4.99   0
  -6  -8 -15    7.77    5.42   0
  -6  -6 -15   42.95    5.86   0
  -6  -4 -14   56.26    5.70   0
  -3  -9 -11   -0.48    4.40   0
  -3  -8 -12   15.54    5.62   0
  -2  -7 -11   13.51    4.83   0
 -10  -6 -14   19.91    5.04   0
  -9  -9 -15    8.94    4.92   0
  -9  -5 -14   10.56    6.03   0
  -8  -9 -15   14.96    5.39   0
  -8  -6 -15   11.98    6.38   0
  -7 -11 -13    0.29    4.89   0
  -6  -3 -13   -0.07    4.88   0
  -5  -5 -14  164.61    7.00   0
  -4  -4 -13    2.62    4.90   0
  -2  -8 -10    8.18    4.17   0
 -10 -10 -14   11.32    4.18   0
  -9  -8 -15   -0.29    5.37   0
  -9  -7 -15   15.36    5.13   0
  -7 -10 -14   17.85    6.24   0
  -7  -8 -15   62.51    6.24   0
  -6 -11 -12   59.33    5.34   0
  -4 -10 -11   20.23    4.17   0
  -4  -3 -12    5.34    4.24   0
  -4  -2 -11    7.20    4.32   0
  -2  -6 -11   26.39    5.44   0
  -2  -5 -11  176.80    6.86   0
 -10  -5 -13   32.28    4.20   0
  -8 -11 -13   33.85    6.48   0
  -8  -8 -15   -2.40    6.30   0
  -8  -7 -15   41.55    6.64   0
  -6  -9 -14   30.70    6.36   0
  -6  -5 -14   39.14    5.74   0
  -5  -7 -14  104.85    6.91   0
  -5  -6 -14   -1.47    5.74   0
  -4  -5 -13    1.29    4.99   0
  -3  -7 -12   27.08    5.92   0
 -11  -7 -13   32.88    4.36   0
 -10  -7 -14    4.35    5.35   0
  -9 -11 -13    5.84    4.64   0
  -9 -10 -14    0.09    5.03   0
  -8 -10 -14   -1.77    5.29   0
  -8  -3 -12    9.11    4.07   0
  -7  -5 -14   59.18    6.29   0
  -4  -7 -13    7.30    5.65   0
  -4  -6 -13   -3.01    5.12   0
  -3  -3 -11   46.13    4.19   0
 -10  -9 -14   10.59    5.15   0
 -10  -8 -14    9.70    5.33   0
  -9  -6 -14    2.14    5.92   0
  -6  -6 -14   15.45    6.27   0
  -5  -3 -12   29.57    5.19   0
  -3  -9 -10   33.63    4.54   0
  -2  -7 -10   -1.83    4.10   0
 -11  -9 -13   23.04    4.13   0
 -11  -8 -13    3.83    4.34   0
  -7 -11 -12   29.68    5.94   0
  -7  -9 -14    9.18    6.25   0
  -7  -4 -13   14.81    5.17   0
  -6  -2 -11   12.53    3.85   0
  -4  -4 -12    1.12    4.34   0
 -11  -6 -12   24.63    4.01   0
 -10 -10 -13   14.56    5.81   0
 -10  -6 -13    4.88    6.19   0
  -9  -9 -14   10.25    5.16   0
  -9  -7 -14    2.80    5.89   0
  -8  -9 -14   24.91    6.75   0
  -7  -6 -14   89.30    6.75   0
  -6 -11 -11   11.81    5.88   0
  -5  -8 -13   13.78    6.37   0
  -5  -5 -13   23.61    5.04   0
  -4  -8 -12   -0.20    5.75   0
  -3  -4 -11  126.90    4.76   0
  -9  -8 -14   69.45    6.34   0
  -9  -4 -12    6.99    4.84   0
  -8 -11 -12   10.90    6.43   0
  -8  -8 -14   17.10    5.69   0
  -5  -6 -13   16.25    5.70   0
  -4  -9 -11   84.47    6.17   0
  -4  -3 -11    5.31    4.00   0
  -3  -7 -11   33.91    5.87   0
  -2  -5 -10    3.85    3.89   0
 -10  -5 -12   -0.12    4.43   0
  -9 -11 -12    2.04    5.06   0
  -9 -10 -13   24.31    5.56   0
  -8 -10 -13   37.29    7.15   0
  -6  -5 -13   19.40    5.73   0
  -4  -7 -12   10.69    6.08   0
  -4  -5 -12    6.09    5.24   0
  -3  -6 -11   64.73    5.54   0
  -3  -5 -11   27.64    4.52   0
 -11  -7 -12   12.72    5.02   0
 -10  -9 -13   -1.61    4.57   0
 -10  -7 -13   -7.72    5.56   0
  -8  -5 -13    4.16    5.96   0
  -7  -5 -13   44.00    5.52   0
  -5  -4 -12   -2.53    4.71   0
  -3  -8 -10    7.49    6.02   0
  -2  -7  -9  184.49    6.11   0
 -11  -9 -12   10.75    4.47   0
 -10  -8 -13   18.21    5.25   0
  -8  -4 -12    7.08    5.38   0
  -7 -11 -11    7.75    5.77   0
  -7  -9 -13   33.48    6.31   0
  -6  -8 -13   24.54    6.33   0
  -6  -7 -13   13.33    5.94   0
  -6  -6 -13   25.42    6.14   0
  -5  -3 -11    4.13    4.28   0
 -11  -8 -12    0.69    4.19   0
 -11  -6 -11   -1.40    4.79   0
 -10 -11 -11    0.28    4.36   0
  -9  -9 -13    5.24    5.74   0
  -8  -9 -13   -1.57    5.85   0
  -7  -6 -13   -0.37    6.02   0
  -7  -4 -12  257.58    7.10   0
  -7  -3 -11   20.45    5.07   0
  -6  -4 -12   12.37    5.39   0
  -5  -8 -12   13.47    6.13   0
  -5  -5 -12    6.57    4.87   0
  -4  -8 -11   12.92    5.40   0
 -11 -10 -11    2.38    4.40   0
 -10 -10 -12   48.37    5.73   0
  -9  -8 -13  100.79    7.17   0
  -9  -7 -13   72.60    7.60   0
  -9  -5 -12    1.65    6.03   0
  -8 -11 -11   15.38    5.73   0
  -8  -6 -13   -0.75    6.52   0
  -4  -9 -10    3.67    5.55   0
  -9 -11 -11    4.78    6.03   0
  -9 -10 -12   26.18    5.75   0
  -9  -4 -11   31.57    4.85   0
  -8 -10 -12  115.95    7.42   0
  -6 -10 -11  117.83    6.93   0
  -5  -9 -11   71.53    6.66   0
  -5  -7 -12   12.51    5.73   0
  -5  -6 -12  143.67    6.36   0
  -4  -7 -11   13.21    6.42   0
  -4  -5 -11   37.77    4.83   0
  -3  -7 -10    2.63    4.61   0
 -10  -9 -12   11.56    5.34   0
 -10  -5 -11   11.75    4.15   0
  -8  -5 -12   -8.32    6.75   0
  -6  -5 -12   -2.46    5.44   0
  -4  -6 -11   64.51    5.61   0
  -3  -6 -10  559.72    8.74   0
 -11  -9 -11   22.94    5.20   0
 -11  -7 -11    2.05    5.44   0
 -10 -11 -10    3.82    5.05   0
 -10  -8 -12   50.43    6.00   0
 -10  -7 -12   34.29    6.29   0
  -8 -12  -8    5.80    5.01   0
  -7 -11 -10   11.64    6.07   0
  -7  -5 -12   38.60    6.11   0
  -6 -11  -9    5.96    4.92   0
  -6  -8 -12    8.65    6.05   0
  -5  -4 -11   49.59    4.69   0
  -3  -8  -9   14.07    4.46   0
 -12  -7  -9    4.76    3.07   0
 -11  -8 -11   -1.36    5.20   0
 -10 -10 -11   43.48    6.03   0
  -9  -9 -12   11.25    6.81   0
  -8  -9 -12   16.55    6.25   0
  -8  -4 -11    4.22    4.92   0
  -8  -3 -10    9.99    3.95   0
  -7 -10 -11    9.03    6.47   0
  -6  -7 -12   11.70    6.13   0
  -5  -3 -10   14.35    3.44   0
 -12  -8  -9   10.94    4.23   0
 -11 -10 -10    1.08    4.93   0
 -11  -6 -10   33.58    4.66   0
  -9 -11 -10    2.02    6.32   0
  -9  -8 -12    2.31    6.87   0
  -8 -11 -10   11.50    6.11   0
  -8  -6 -12   49.08    6.67   0
  -7  -8 -12   81.79    7.07   0
  -7  -4 -11    4.10    5.43   0
  -6  -4 -11   -7.99    4.82   0
  -5  -5 -11    1.28    4.87   0
  -4  -8 -10   10.80    5.43   0
  -9 -10 -11    7.07    6.16   0
  -9  -5 -11   58.37    6.24   0
  -8 -12  -7   48.42    5.49   0
  -8 -10 -11   29.34    6.73   0
  -7  -7 -12   58.53    6.51   0
  -7  -3 -10  252.21    6.01   0
  -5  -9 -10    3.07    5.87   0
 -10 -11  -9   15.29    5.30   0
 -10  -9 -11   42.66    5.98   0
  -9  -4 -10    4.83    5.06   0
  -7 -11  -9   21.64    6.56   0
  -6 -11  -8   28.45    6.05   0
  -5  -6 -11   29.70    5.07   0
  -4  -5 -10    6.54    3.94   0
 -12  -7  -8    0.64    4.12   0
 -11  -9 -10   12.19    5.33   0
 -11  -7 -10    2.46    5.05   0
 -10 -10 -10    0.99    6.98   0
 -10  -8 -11   -1.70    6.21   0
 -10  -7 -11  136.22    6.67   0
  -8  -5 -11   67.26    6.59   0
  -6  -8 -11  108.11    7.27   0
  -6  -5 -11   -1.26    5.00   0
  -3  -8  -8   38.47    4.49   0
  -3  -6  -9  238.40    5.50   0
 -12  -8  -8   59.15    4.73   0
 -11 -10  -9  -10.95    5.44   0
 -11  -8 -10    3.92    5.11   0
  -9 -11  -9   10.09    6.35   0
  -9  -9 -11   47.04    6.31   0
  -9  -6 -11   94.41    7.39   0
  -8 -12  -6    6.99    5.23   0
  -8 -11  -9    6.18    6.29   0
  -7  -5 -11    4.79    5.46   0
  -6  -7 -11    5.17    6.07   0
  -6  -6 -11    4.88    5.62   0
  -5  -4 -10  296.03    5.94   0
 -11  -6  -9    1.20    5.51   0
  -9 -10 -10    3.52    6.50   0
  -8 -10 -10   58.39    7.15   0
  -8  -4 -10    1.26    4.99   0
  -8  -3  -9   53.35    4.09   0
  -7  -8 -11   19.64    6.77   0
  -5 -10  -8    2.69    5.09   0
  -5  -8 -10   -0.86    5.78   0
  -4  -9  -8   14.35    6.16   0
  -4  -8  -9   14.29    4.44   0
 -10 -11  -8    7.10    5.47   0
  -8  -8 -11   57.91    7.05   0
  -8  -6 -11   -2.82    5.51   0
  -7 -11  -8   84.89    7.02   0
  -7  -7 -11   68.16    7.41   0
  -7  -6 -11   41.17    6.19   0
  -6 -11  -7   -0.88    5.72   0
  -6  -4 -10   -0.29    4.65   0
  -5  -9  -9   50.68    5.99   0
  -5  -5 -10    4.94    4.13   0
 -12  -7  -7    6.91    4.07   0
 -11 -10  -8   10.29    5.59   0
 -11  -9  -9   16.62    5.09   0
 -10 -10  -9   -5.35    6.96   0
 -10  -9 -10  118.06    7.27   0
  -9  -5 -10   75.42    6.52   0
  -8  -7 -11  158.59    7.54   0
  -7  -3  -9  206.28    5.81   0
  -5  -7 -10   50.50    5.77   0
  -5  -6 -10   63.92    5.01   0
  -3  -7  -8   71.02    4.22   0
 -12  -8  -7    8.81    4.15   0
 -11  -8  -9   -1.87    5.70   0
 -11  -7  -9    7.07    5.21   0
 -10  -8 -10   21.36    7.28   0
  -9 -11  -8   -2.78    5.90   0
  -9  -4  -9   12.47    5.64   0
  -4  -7  -9  167.78    6.22   0
  -3  -8  -7    2.95    4.77   0
 -10 -11  -7    1.12    5.51   0
  -9 -10  -9   55.34    7.17   0
  -9  -9 -10   18.61    6.23   0
  -8  -5 -10    8.89    5.97   0
  -6  -5 -10    2.49    4.64   0
  -4  -6  -9  513.93    7.96   0
 -11 -10  -7    6.23    5.56   0
 -11  -9  -8   11.45    5.76   0
  -8 -10  -9   47.05    7.52   0
  -7 -11  -7   79.56    6.93   0
  -6  -7 -10  153.33    6.65   0
  -6  -6 -10   10.77    5.38   0
  -5 -10  -7   26.02    5.05   0
  -5  -8  -9    0.09    5.41   0
  -4  -9  -7   69.52    6.67   0
  -4  -8  -8   10.03    5.45   0
 -12  -8  -6    2.30    4.71   0
 -12  -7  -6   28.96    4.01   0
 -10 -11  -6    1.15    6.48   0
 -10 -10  -8   -3.26    5.91   0
 -10  -9  -9   42.77    6.97   0
  -9 -11  -7   24.35    6.44   0
  -9  -7 -10   55.25    5.99   0
  -8 -11  -7    9.39    6.44   0
  -8  -8 -10   -3.13    6.90   0
  -8  -6 -10   79.44    5.55   0
  -8  -4  -9    0.13    5.13   0
  -7  -8 -10   73.90    7.38   0
  -7  -6 -10   15.06    5.85   0
  -5  -9  -8   71.67    6.48   0
 -11  -8  -8   71.90    6.51   0
 -11  -7  -8   22.28    5.95   0
 -10  -8  -9   64.51    8.76   0
  -9  -5  -9   -3.56    7.47   0
  -8  -7 -10   43.83    6.40   0
  -8  -3  -8    5.02    3.52   0
  -7  -7 -10    9.66    6.10   0
 -11 -10  -6    4.75    5.44   0
  -9 -10  -8   51.63    7.11   0
  -7  -4  -9   28.89    4.60   0
  -6 -11  -5   -0.67    5.67   0
  -5  -7  -9   32.40    4.16   0
  -5  -6  -9   15.38    4.21   0
 -12  -8  -5   -1.93    4.15   0
 -12  -7  -5   19.80    4.55   0
 -11  -9  -7   21.13    5.34   0
 -10 -11  -5   66.08    5.57   0
  -9 -11  -6  129.05    7.00   0
  -9  -4  -8   13.99    5.14   0
  -8 -10  -8    8.08    6.98   0
  -7  -3  -8  189.49    5.07   0
  -6 -10  -7   15.57    6.78   0
  -6  -8  -9   13.19    5.44   0
  -4  -7  -8   12.89    4.61   0
  -3  -8  -6    5.14    3.72   0
 -11 -10  -5   31.68    6.73   0
 -11  -6  -7   22.47    5.78   0
 -10 -10  -7   12.86    5.72   0
 -10  -9  -8   26.90    7.01   0
  -9  -6  -9   60.36    6.61   0
  -8  -5  -9  124.25    6.55   0
  -6  -9  -8   66.03    6.70   0
  -5  -8  -8   -1.66    6.37   0
  -4  -9  -6   -1.48    6.11   0
  -4  -6  -8  351.85    6.36   0
 -12  -8  -4   30.47    4.62   0
 -11  -8  -7   19.58    6.90   0
 -11  -7  -7   29.00    6.63   0
 -10 -11  -4   41.70    5.36   0
  -9  -7  -9    1.51    5.90   0
  -8  -8  -9   25.44    6.38   0
  -7 -11  -5   28.61    7.36   0
  -7  -8  -9   23.92    6.16   0
  -7  -5  -9   72.28    5.79   0
  -6 -11  -4   20.55    6.04   0
  -6  -7  -9  145.77    6.42   0
  -6  -6  -9   41.47    5.65   0
  -5  -9  -7   10.04    5.49   0
  -4  -8  -7    8.32    4.87   0
 -12  -7  -4   14.22    3.85   0
 -11 -10  -4   63.83    6.70   0
 -11  -9  -6   54.29    5.68   0
 -10  -8  -8   38.88    7.12   0
  -9 -11  -5   22.33    6.76   0
  -9 -10  -7    2.26    7.49   0
  -8 -11  -5   26.26    8.04   0
  -8  -7  -9   10.33    6.36   0
  -8  -6  -9   15.92    5.71   0
  -8  -4  -8   30.64    5.32   0
  -7  -9  -8    9.84    5.98   0
  -7  -7  -9   37.21    5.98   0
  -7  -6  -9    4.95    5.55   0
 -10 -10  -6   19.86    5.95   0
 -10  -9  -7    3.10    8.28   0
 -10  -5  -7   12.60    6.48   0
  -8 -10  -7   21.27    7.42   0
  -8  -9  -8  144.47    8.37   0
  -6 -10  -6   16.94    6.79   0
  -5 -10  -5   27.59    5.47   0
  -5  -7  -8    6.96    4.70   0
 -12  -7  -3    3.46    3.83   0
 -11 -10  -3   33.56    5.18   0
 -11  -8  -6   17.48    5.81   0
 -11  -6  -6    8.68    5.52   0
  -9 -11  -4   10.97    6.77   0
  -9  -8  -8   12.99    7.24   0
  -7 -11  -4  179.34    8.38   0
  -7  -4  -8   43.31    4.57   0
  -6 -11  -3  168.99    6.83   0
  -6  -8  -8    8.27    5.90   0
  -5  -6  -8    2.49    3.92   0
  -4  -7  -7  302.62    6.89   0
 -11  -9  -5   19.57    5.45   0
 -11  -5  -5    2.88    3.95   0
 -10 -10  -5   31.98    7.52   0
  -9 -10  -6    8.85    6.87   0
  -9  -7  -8    3.73    5.68   0
  -9  -6  -8  -12.89    6.75   0
  -9  -4  -7   54.89    5.59   0
  -8 -11  -4   69.42    6.44   0
  -7  -8  -8   67.38    6.85   0
  -6  -9  -7   12.29    6.30   0
  -4  -9  -5  102.50    5.87   0
  -3  -8  -5  413.58    7.01   0
 -10  -8  -7    3.34    6.86   0
 -10  -6  -7  164.47    7.79   0
  -9 -11  -3    8.63    5.76   0
  -8  -8  -8   29.02    7.13   0
  -8  -5  -8   32.98    5.70   0
  -6 -11  -2   48.90    5.85   0
  -6  -7  -8    1.28    4.95   0
  -6  -5  -8    8.52    3.75   0
  -5  -9  -6  170.53    6.79   0
  -4  -8  -6  155.63    5.77   0
 -11  -9  -4   10.69    5.03   0
 -11  -8  -5  154.31    8.33   0
 -10  -9  -6    7.47    6.93   0
  -9 -11  -2   -8.69    5.83   0
  -9 -11  -1   15.48    5.70   0
  -8 -11  -3  148.54    7.38   0
  -8  -9  -7    9.71    6.81   0
  -8  -7  -8    0.58    6.31   0
  -8  -6  -8   -0.92    5.64   0
  -7  -7  -8   44.90    6.34   0
  -6  -6  -8  154.77    6.25   0
  -5 -10  -4    8.16    5.20   0
 -11  -7  -5    4.38    7.76   0
 -11  -6  -5   10.49    5.74   0
 -11  -5  -4   44.59    5.61   0
 -10 -10  -4    6.18    6.53   0
 -10  -5  -6   89.35    6.09   0
  -9 -10  -5   64.44    7.39   0
  -9  -5  -7   73.23    6.28   0
  -7  -6  -8   39.34    5.24   0
 -11  -9  -3   15.74    5.76   0
 -10  -8  -6   15.43    7.12   0
  -9  -8  -7   35.40    7.23   0
  -8 -11  -2    2.33    5.95   0
  -7 -11  -2  107.79    6.62   0
  -6  -9  -6   -2.07    6.31   0
  -6  -8  -7   95.84    6.46   0
  -5  -7  -7    1.59    4.80   0
 -11  -8  -4   74.48    6.65   0
 -10 -10  -3   35.85    6.40   0
 -10  -9  -5    6.94    7.11   0
 -10  -6  -6  -13.01    6.86   0
  -9  -7  -7   56.60    6.14   0
  -9  -6  -7   13.07    5.97   0
  -9  -4  -6   39.15    5.50   0
  -8 -11  -1    8.49    5.87   0
  -8 -11   0  142.34    6.41   0
  -7 -11  -1   -8.62    6.75   0
  -7  -8  -7    4.77    5.72   0
  -7  -4  -7   26.82    4.55   0
  -5  -9  -5  228.29    8.02   0
  -4  -9  -4    2.76    5.01   0
 -11  -9  -2   65.12    6.17   0
 -11  -9  -1   37.36    6.02   0
 -11  -7  -4  142.84    8.61   0
 -11  -6  -4   10.31    5.69   0
 -10 -10  -2    3.94    5.90   0
  -9 -10  -4  145.99    8.07   0
  -8  -9  -6   19.63    6.48   0
  -8  -5  -7    6.40    5.45   0
  -7 -11   0   19.08    6.19   0
  -7 -11   1    9.97    5.05   0
  -7  -9  -6   72.80    6.29   0
  -6 -10  -4   69.08    6.72   0
  -5  -8  -6    0.65    5.25   0
  -5  -6  -7   13.76    3.67   0
 -11  -8  -3   -4.16    6.69   0
 -11  -5  -3    9.09    4.96   0
 -10 -10  -1   65.89    6.51   0
 -10 -10   0   49.90    6.17   0
  -8  -7  -7    2.45    5.78   0
  -8  -6  -7    6.70    5.87   0
  -7  -7  -7   37.97    6.16   0
  -6  -7  -7   12.14    4.91   0
  -4  -8  -5   85.26    5.21   0
 -10  -9  -4    5.89    7.36   0
 -10  -8  -5   -5.69    6.92   0
 -10  -5  -5   38.36    5.93   0
  -9 -10  -3   30.06    7.08   0
  -9  -8  -6   54.63    7.65   0
  -9  -5  -6    6.71    6.04   0
  -8 -10  -4   21.53    7.36   0
  -7  -6  -7  118.73    5.75   0
  -6  -6  -7    2.37    4.92   0
  -6  -5  -7  406.62    6.11   0
 -11  -8  -2   -0.55    6.26   0
 -11  -7  -3   78.89    6.87   0
 -10  -6  -5   29.69    8.48   0
 -10  -4  -4   43.79    5.27   0
  -9  -7  -6   91.70    6.63   0
  -8  -8  -6    7.97    7.23   0
  -8  -4  -6   12.00    5.43   0
  -6  -9  -5    2.94    6.32   0
  -5 -10  -2   14.96    5.42   0
 -11  -5  -2   10.84    4.67   0
 -10  -9  -3   14.20    6.87   0
  -9 -10  -2   49.51    7.06   0
  -9  -6  -6   77.47    6.75   0
  -8  -9  -5   56.80    7.31   0
  -7  -9  -5    0.75    5.78   0
  -7  -8  -6  164.12    6.79   0
  -5  -9  -4   30.11    5.83   0
 -11  -8  -1   43.92    5.46   0
 -11  -8   0    9.28    6.03   0
 -11  -7  -2   20.45    7.33   0
 -10  -8  -4   11.73    6.88   0
  -9  -4  -5  119.51    5.83   0
  -8  -3  -5   10.57    3.61   0
  -5  -8  -5   16.96    5.52   0
 -11  -8   1    0.99    4.54   0
 -11  -6  -2   62.34    6.33   0
 -11  -5  -1   48.30    5.59   0
 -10  -9  -2   -7.27    7.04   0
 -10  -5  -4    6.17    6.08   0
  -9 -10  -1   41.51    7.20   0
  -9 -10   2    7.61    6.37   0
  -8  -7  -6   60.68    6.94   0
  -8  -6  -6   13.86    5.95   0
  -8  -5  -6  416.96    7.81   0
  -7  -7  -6   22.10    5.94   0
  -7  -4  -6  457.30    6.65   0
  -6  -7  -6   54.33    5.11   0
  -4  -8  -4   72.71    5.10   0
 -11  -7  -1   -0.61    5.46   0
 -10  -9  -1    4.90    7.34   0
 -10  -6  -4   42.77    7.22   0
  -9 -10   0    2.49    6.35   0
  -9 -10   1   -1.24    6.48   0
  -9  -7  -5   20.35    7.01   0
  -9  -5  -5  178.30    6.74   0
  -8  -8  -5   72.10    7.80   0
  -7 -10  -2   47.02    7.22   0
  -6  -9  -4   14.53    6.66   0
  -6  -8  -5   13.49    6.23   0
 -11  -7   0   52.29    6.49   0
 -11  -6  -1    9.21    5.52   0
 -11  -5   0    3.74    5.45   0
 -10  -9   0  135.38    8.13   0
 -10  -9   2    4.87    6.59   0
 -10  -8  -3    6.30    7.30   0
  -9  -9  -3  102.07    7.41   0
  -9  -6  -5   -2.81    6.37   0
  -8 -10  -1   13.40    7.05   0
  -7  -9  -4   10.61    6.01   0
  -7  -8  -5   11.91    6.47   0
  -7  -6  -6   10.03    4.52   0
  -7  -5  -6   21.80    4.84   0
  -6  -6  -6   12.80    4.21   0
 -11  -7   1   25.35    5.32   0
 -11  -7   2    1.81    4.36   0
 -11  -6   0    9.81    6.13   0
 -10  -9   1  180.38    7.21   0
  -9  -8  -4    9.80    7.35   0
  -5  -7  -5    6.69    4.81   0
 -11  -6   1   27.51    5.92   0
 -11  -6   2    8.48    4.75   0
 -11  -5   1   40.58    4.84   0
 -11  -5   2   85.25    4.95   0
 -10  -8  -2   47.31    7.72   0
 -10  -5  -3    5.30    6.44   0
  -9  -9  -2   12.29    6.64   0
  -9  -4  -4   18.80    5.33   0
  -8 -10   0   20.55    7.28   0
  -8 -10   1   69.56    8.67   0
  -8 -10   3   27.86    5.58   0
  -8  -7  -5   49.25    6.43   0
  -6 -10   0   43.92    7.38   0
  -6  -9  -3   43.81    6.86   0
  -5 -10   1   94.72    5.51   0
 -10  -4  -2   -1.43    5.25   0
  -9  -7  -4   47.11    7.15   0
  -8 -10   2   27.79    6.52   0
  -8  -8  -4   32.42    7.93   0
  -8  -6  -5   34.33    6.18   0
  -8  -5  -5   71.02    6.29   0
  -8  -3  -4    6.33    4.64   0
  -7 -10   0   -3.91    7.54   0
  -7 -10   4    7.17    6.20   0
  -7  -9  -3   44.88    6.70   0
  -7  -7  -5  103.62    6.89   0
  -6  -7  -5   25.25    4.73   0
  -4  -9  -1   24.58    6.22   0
  -4  -8  -3   10.42    4.58   0
 -10  -8  -1   16.66    7.06   0
  -9  -9  -1   74.61    7.49   0
  -9  -6  -4   11.07    6.63   0
  -9  -5  -4    1.61    6.21   0
  -7  -8  -4   14.93    6.53   0
  -7  -4  -5   38.89    3.75   0
  -6 -10   1    9.62    6.35   0
  -6 -10   4   14.42    6.43   0
  -6  -8  -4    4.79    6.04   0
  -5  -9  -2   33.44    6.08   0
 -10  -8   0   22.37    6.98   0
 -10  -8   4    5.83    5.64   0
 -10  -5  -2  107.61    7.62   0
  -9  -9   0   69.70    9.58   0
  -9  -9   4   -2.67    7.01   0
  -7 -10   2   22.74    7.08   0
  -7 -10   3   -2.21    6.34   0
  -7  -6  -5   -1.98    4.68   0
  -6 -10   2   17.94    5.56   0
  -6  -6  -5  106.64    5.10   0
 -10  -8   1   69.29    6.55   0
 -10  -8   2  236.86    8.04   0
 -10  -8   3    1.72    6.59   0
  -9  -9   1    2.90    8.61   0
  -9  -9   3   27.00    8.40   0
  -8  -7  -4   -6.80    6.35   0
  -7  -5  -5  115.84    4.16   0
  -6  -9  -2   -0.72    6.45   0
  -9  -9   2   51.60    7.66   0
  -9  -7  -3  151.57    8.28   0
  -9  -4  -3   39.27    5.99   0
  -8  -8  -3  103.19    8.40   0
  -8  -4  -4  229.12    6.92   0
  -5  -8  -3    5.41    5.65   0
  -5  -7  -4    4.66    5.04   0
  -4  -9   0   11.20    4.71   0
 -10  -7   0   18.30    8.55   0
 -10  -7   5   -8.72    6.08   0
  -9  -5  -3  112.60    6.71   0
  -8  -6  -4   10.55    6.06   0
  -8  -5  -4   67.94    6.33   0
  -7  -8  -3   35.81    6.21   0
  -7  -7  -4   49.98    6.69   0
  -6  -8  -3   48.39    6.37   0
  -6  -7  -4   82.12    4.83   0
  -4  -8  -2    9.15    4.47   0
  -8  -9   0   20.25    7.47   0
  -7  -9  -1   50.41    7.95   0
 -10  -7   1    5.65    6.82   0
 -10  -7   2   25.65    7.55   0
 -10  -7   4   29.29    5.70   0
 -10  -6   0   18.80    6.40   0
  -9  -7  -2   56.72    7.58   0
  -8  -9   1   80.89    7.58   0
  -8  -9   5    5.46    5.97   0
  -8  -8  -2   54.65    7.60   0
  -8  -7  -3    2.26    5.96   0
  -7  -6  -4   37.69    4.74   0
 -10  -7   3  106.34    5.63   0
  -9  -8   0   32.37    6.83   0
  -9  -6  -2  160.48    6.65   0
  -9  -4  -2    4.47    5.21   0
  -8  -9   2  128.15    7.16   0
  -8  -9   3   11.48    7.10   0
  -8  -9   4  103.69    7.18   0
  -7  -8  -2    0.94    5.51   0
  -7  -5  -4   18.97    4.55   0
  -6  -6  -4    2.89    4.00   0
 -10  -6   5    1.08    4.68   0
 -10  -5   6    9.30    4.21   0
 -10  -4   1    5.95    4.46   0
  -9  -8   1   54.12    6.54   0
  -9  -8   5   26.23    5.89   0
  -9  -7  -1   -2.13    6.59   0
  -9  -5  -2    1.02    5.64   0
  -8  -8  -1   23.98    6.79   0
  -8  -6  -3    5.70    5.67   0
  -8  -4  -3   66.19    5.44   0
  -7  -9   6   28.06    5.59   0
  -7  -7  -3   33.31    6.05   0
  -6  -9   7    3.95    5.71   0
  -5  -9   1    7.27    6.79   0
  -5  -7  -3  247.30    6.09   0
 -10  -6   2   13.68    6.54   0
 -10  -6   3    6.08    6.59   0
 -10  -6   4    6.15    4.87   0
 -10  -5   1    4.59    5.71   0
 -10  -4   2   73.27    5.85   0
  -9  -8   2   -2.72    6.92   0
  -9  -8   3   62.46    6.01   0
  -9  -8   4    6.44    6.02   0
  -8  -7  -2    0.76    6.59   0
  -8  -5  -3   74.15    5.67   0
  -6  -9   1    5.40    6.58   0
  -5  -9   7    3.59    5.73   0
 -10  -5   2   40.43    5.97   0
 -10  -5   5    4.98    4.94   0
 -10  -4   3   13.63    5.45   0
 -10  -4   5    5.84    4.54   0
  -9  -7   7   25.32    4.76   0
  -8  -8   0   10.54    6.50   0
  -8  -8   7   35.47    4.76   0
  -7  -9   2    1.75    6.30   0
  -7  -9   3   38.34    6.17   0
  -7  -9   4   20.16    7.66   0
  -7  -9   5   27.91    5.95   0
  -7  -8  -1   11.06    5.35   0
 -10  -5   3  138.34    5.36   0
 -10  -5   4   17.21    5.30   0
 -10  -4   4   43.65    4.23   0
  -9  -5  -1   21.68    5.63   0
  -9  -4  -1   11.03    4.96   0
  -8  -3  -2   95.16    4.54   0
  -7  -6  -3    6.33    4.32   0
  -6  -8  -1   55.20    5.64   0
  -5  -9   6    5.50    5.29   0
  -5  -8  -1   32.60    5.34   0
  -9  -7   6   15.37    5.24   0
  -8  -7  -1  305.70    7.18   0
  -8  -6  -2   59.99    5.57   0
  -7  -7  -2  199.89    6.19   0
  -7  -5  -3  183.28    4.50   0
  -7  -4  -3   16.75    3.22   0
  -6  -9   4    8.65    5.70   0
  -6  -9   5   14.35    6.23   0
  -6  -6  -3   19.54    3.43   0
  -5  -9   4    6.00    5.38   0
  -5  -9   5    7.49    5.35   0
  -9  -7   5   -0.43    6.13   0
  -9  -6   0   31.62    5.79   0
  -8  -8   6    9.19    5.45   0
  -8  -4  -2  185.98    5.02   0
  -7  -8   0  102.18    5.65   0
  -7  -8   8    8.13    5.57   0
  -6  -7  -2   37.16    4.57   0
  -5  -7  -2  166.62    5.21   0
  -9  -7   3    1.57    5.90   0
  -9  -7   4   53.55    6.12   0
  -9  -4   0    4.45    4.87   0
  -8  -8   3   62.40    5.32   0
  -8  -8   4   56.17    6.09   0
  -8  -8   5   10.20    5.59   0
  -6  -8   9    8.90    4.82   0
  -5  -8   0   17.13    4.70   0
  -9  -6   7    9.68    4.53   0
  -8  -7   0  110.18    6.47   0
  -8  -7   8    2.38    5.71   0
  -8  -6  -1   44.21    4.69   0
  -7  -7  -1   91.30    4.86   0
  -4  -8   1    6.24    4.24   0
  -4  -7  -1   68.92    3.50   0
  -9  -5   8    1.03    3.43   0
  -7  -8   7   12.68    5.72   0
  -9  -6   3   17.29    5.62   0
  -9  -6   6   15.97    4.12   0
  -9  -5   1   66.93    5.79   0
  -9  -4   1    7.01    4.92   0
  -8  -7   1   -7.14    5.52   0
  -8  -5  -1   24.27    4.65   0
  -8  -4  -1    4.70    3.93   0
  -7  -8   2   -2.25    4.76   0
  -7  -8   6    4.69    6.56   0
  -7  -5  -2   22.25    3.37   0
  -6  -8   1    9.44    4.95   0
  -6  -7  -1  179.48    5.14   0
  -6  -6  -2   45.75    3.56   0
  -5  -8   9    1.04    4.88   0
  -9  -6   4   -0.69    5.32   0
  -9  -6   5    8.98    5.02   0
  -9  -5   2   21.80    5.62   0
  -9  -5   7    0.47    4.87   0
  -9  -4   8   17.04    4.00   0
  -9  -3   8   17.31    3.26   0
  -8  -7   2    8.41    5.29   0
  -8  -7   7   11.25    4.99   0
  -8  -6   0  189.16    5.25   0
  -7  -8   4   31.03    5.66   0
  -7  -8   5   25.50    5.42   0
  -7  -7   0  131.40    5.06   0
  -6  -8   8   28.29    4.76   0
  -4  -8   2  150.89    4.70   0
  -4  -8   9   12.58    4.78   0
  -9  -4   2   89.42    5.25   0
  -8  -7   6   16.90    4.79   0
  -8  -6   9    1.60    4.46   0
  -7  -6  -1  297.97    5.42   0
  -6  -8   2    1.49    4.06   0
  -5  -8   2  324.24    5.60   0
  -4  -4   8   18.95    6.51   0
  -3  -4  11    4.35    8.44   0
  -2  -9   9    9.22    6.18   0
  -1  -9  10    6.04    6.53   0
  -1  -1  13   51.11    6.35   0
   0  -2  15   30.28    6.92   0
   1  -4  16    9.93    5.34   0
  -3  -2   9  159.32    6.53   0
   3  -3  17    7.09    3.49   0
   3  -2  17    8.00    4.08   0
  -4  -7   7   81.99    7.66   0
  -4  -4   7  561.22    8.63   0
  -2  -1  10   19.29    6.24   0
  -1   0  11    9.91    4.67   0
   0  -8  12    7.10    7.76   0
   0  -3  15    2.19    6.41   0
   0   0  13    7.53    5.99   0
  -4  -6   7    8.48    6.84   0
  -4  -5   7   18.96    6.48   0
  -3  -8   8    5.71    7.12   0
  -3  -2   8  103.74    5.27   0
  -2  -4  12   -4.49   11.29   0
  -1  -6  13   -4.34    7.40   0
  -1  -2  13  117.98    9.11   0
   0  -1  14   53.66    7.09   0
   2  -1  16    5.12    5.64   0
  -4  -7   6    2.59    6.32   0
  -4  -4   6   52.50    5.29   0
  -3  -5  10   92.05    8.49   0
  -2  -9   8   14.54    6.93   0
  -2  -2  11  130.24    8.27   0
  -1  -8  11   23.06    8.45   0
  -1  -7  12    4.31    8.94   0
  -1  -1  12  480.96   10.70   0
   0  -7  13   -5.89    7.68   0
   1  -5  15    0.27    6.81   0
   2  -4  16    4.92    6.33   0
  -4  -6   6   21.08    6.44   0
  -4  -4   5   33.15    4.51   0
  -1  -5  13   14.59    7.61   0
  -3  -9   5   11.28    5.33   0
  -3  -4   9   28.93    6.80   0
  -2  -6  11    9.97    8.15   0
  -1  -9   9    0.75    6.70   0
  -1  -3  13   -4.94    8.39   0
   0  -5  14    2.98    7.28   0
   2  -2  16    6.20    6.14   0
  -3  -7   8   -1.37    8.67   0
  -3  -5   9    1.12    6.86   0
  -3  -3   8    0.73    5.63   0
  -2  -8   9    0.34    8.18   0
  -2  -7  10   -1.73    8.70   0
  -2  -2  10   39.87    6.64   0
   1  -6  14   -8.59    6.32   0
   1  -4  15   24.12    6.51   0
  -2  -9   7   -0.79    6.74   0
  -2  -4  11   -5.51    9.23   0
  -1  -6  12   -0.01    8.26   0
  -1  -2  12   24.68    7.79   0
  -1  -1  11   13.46    6.02   0
   1  -7  13   11.92    6.97   0
   3  -4  16   -1.19    4.74   0
  -4  -6   3    2.71    3.93   0
  -3  -6   8   28.25    6.30   0
  -1  -8  10   -0.38    8.35   0
  -1  -7  11   -1.04    9.09   0
   0  -8  11   10.27    8.82   0
   2  -5  15   -5.97    6.28   0
   3  -1  16   12.55    4.59   0
  -3  -5   8   25.65    7.32   0
  -2  -6  10   -5.10    8.77   0
  -2  -3  10   89.11    7.54   0
  -1  -9   8   14.02    7.76   0
   0  -7  12    8.23    8.70   0
   1  -1  14    0.59    6.64   0
   1   0  13   12.62    6.16   0
   3  -3  16    3.54    6.91   0
   3  -2  16    4.88    6.87   0
   4  -4  16    0.67    4.04   0
  -2  -9   6   10.82    6.15   0
  -2  -4  10   29.60    8.72   0
  -1  -4  12   10.20    9.49   0
   0  -9   9   19.68    6.77   0
   0  -2  13   28.33    7.75   0
   1  -5  14    8.00    7.34   0
   2  -7  13    4.72    7.64   0
  -3  -6   7    2.77    7.28   0
  -1  -1  10   12.35    5.40   0
   0  -1  12   20.13    7.35   0
   2  -4  15   15.88    7.11   0
   3  -5  15  -12.41    5.52   0
  -3  -8   4   16.08    7.75   0
  -3  -7   6   -4.26    6.75   0
  -3  -5   7  179.45    7.59   0
  -2  -3   9   42.56    6.41   0
  -1  -8   9    0.56    7.60   0
   1  -8  11    3.30    9.11   0
   1  -2  14   58.15    7.84   0
   2  -3  15   -1.33    7.67   0
  -3  -4   6  118.47    4.47   0
  -2  -6   9    9.22    7.39   0
  -1  -9   7   -3.98    6.94   0
  -1  -7  10   24.89    9.05   0
   0  -8  10   23.56    9.14   0
   1  -9   9   17.33    7.62   0
   1  -7  12   33.29    8.81   0
   1  -6  13  -11.22    7.79   0
   3  -6  14    4.76    6.41   0
   4  -5  15    2.65    4.74   0
   4  -2  16    5.87    6.49   0
  -3  -8   3   20.46    5.53   0
  -3  -7   5   28.20    6.65   0
  -2  -5   9    7.59    7.78   0
  -2  -4   9   15.65    7.19   0
   0  -9   8    4.85    7.35   0
   0  -7  11    0.41    9.49   0
  -1  -2  10    2.42    6.84   0
   2  -8  11    2.51    7.50   0
   2  -5  14   68.31    7.86   0
   3  -4  15   11.64    6.93   0
  -3  -7   4  495.34    8.26   0
  -1  -9   6   16.66    7.92   0
  -1  -8   8   10.27    7.54   0
  -1  -6  10   98.79    9.83   0
   0  -1  11   16.07    5.50   0
   2  -9   9    0.79    6.16   0
   2  -1  14   16.59    6.92   0
  -2  -7   7   14.78    7.68   0
  -1  -3  10   -2.88    7.33   0
   0  -4  12   63.05    9.42   0
   1  -8  10   -1.04    9.00   0
   2  -7  12   23.93    8.14   0
   2  -6  13   22.95    7.46   0
   2  -4  14    0.83    8.40   0
   2   0  13   30.43    6.11   0
   3  -3  15    4.53    7.55   0
   4  -4  15    4.24    6.88   0
  -3  -6   4  113.89    5.68   0
  -2  -5   8   86.77    7.97   0
  -1  -5  10    5.82    9.58   0
  -1  -4  10   66.21    9.58   0
   0  -8   9    6.41    8.58   0
   1  -3  13   15.28    8.30   0
   2  -2  14    2.79    7.15   0
   3  -5  14   23.81    7.44   0
   3   0  14   -1.40    4.69   0
  -2  -8   5  361.10    9.41   0
  -1  -2   9    2.23    4.83   0
   0  -7  10   27.41    9.64   0
   1  -7  11   14.37    9.79   0
   3  -7  12    7.73    7.59   0
   5  -4  15   -8.18    5.34   0
  -2  -7   6  402.39   10.22   0
  -2  -4   7  201.19    6.63   0
  -1  -6   9   42.83    8.44   0
   3  -6  13   31.70    7.17   0
   4  -7  12   -0.39    7.63   0
   4  -3  15    2.51    6.64   0
  -2  -8   4   90.38    7.08   0
  -2  -5   7   -2.90    6.16   0
   0  -4  11   27.46    9.71   0
   2  -9   8    4.48    7.37   0
   2  -8  10   -6.77    8.78   0
   3  -4  14   32.99    9.73   0
   5  -5  14   11.02    6.92   0
  -1  -5   9   10.37    7.63   0
   0  -9   6   15.87    7.08   0
   0  -8   8   59.87    8.56   0
   0  -6  10   18.55    9.22   0
   1  -8   9    0.53    9.06   0
   2  -7  11    8.48   10.48   0
   2  -6  12   -5.39    9.86   0
   2  -1  13   -4.09    6.55   0
   3  -9   8   -0.02    6.40   0
   3  -1  14   -2.81    6.43   0
   5  -6  13    1.44    6.16   0
   5  -3  15   15.17    7.81   0
  -2  -8   3    7.65    5.99   0
  -2  -7   5  158.76    7.72   0
  -2  -6   6  110.57    7.74   0
  -1  -8   6   36.37    8.42   0
   1  -9   7    1.82    8.12   0
   1  -4  12   75.91    9.24   0
   2   0  12    2.45    4.82   0
   3  -8  10   -0.20    8.33   0
   3  -2  14   59.76    8.54   0
   4  -8  10    5.71    6.67   0
   6  -3  15    5.14    6.02   0
  -1  -7   7   80.65    9.58   0
   0  -2  10   29.21    6.98   0
   1  -7  10   -6.12    9.95   0
   2  -3  13    0.13    8.23   0
   2  -2  13    3.07    7.15   0
   3  -5  13   79.28   10.74   0
   5  -2  15    4.78    6.43   0
   5  -1  15    2.58    6.16   0
  -1  -3   8  104.36    6.76   0
   0  -9   5   -6.62    7.92   0
   0  -5  10  123.93   10.59   0
   2  -9   7    6.25    9.96   0
   3  -7  11    6.28    8.17   0
   3   0  13    3.47    4.68   0
   4  -4  14   21.05    7.13   0
  -1  -8   5   36.00    8.05   0
  -1  -5   8  200.32    8.39   0
   1  -9   6    5.83    9.07   0
   2  -8   9    4.67    9.37   0
   3  -6  12   29.50    8.71   0
   5  -7  11   -4.18    7.56   0
   0  -7   8   20.55    8.52   0
   0  -6   9   16.22    9.75   0
   1  -8   8    3.27    8.73   0
   1  -2  11   -4.20    8.34   0
   2  -1  12   55.91    6.41   0
   3  -9   7   10.72    7.42   0
   4  -7  11    6.99    7.85   0
   4  -1  14   24.42    6.33   0
   6  -6  12    0.31    7.23   0
   6  -4  14    2.46    5.90   0
  -2  -7   3   33.66    5.21   0
  -1  -7   6    7.85    8.00   0
   1  -6  10    6.53   10.50   0
   1  -4  11    3.44    8.62   0
   2  -7  10    0.92   10.26   0
   2  -6  11    1.39    9.11   0
   3  -8   9   -5.26    9.30   0
   3  -1  13    4.23    6.51   0
   4  -6  12    6.33    7.64   0
   6  -5  13   -3.24    6.72   0
  -1  -8   4   18.11    7.15   0
   0  -8   6   15.25    7.97   0
   0  -5   9    3.61    8.34   0
   2  -4  12   68.18    7.99   0
   2  -2  12   12.67    7.70   0
   3  -2  13   21.81    8.62   0
   4  -8   9   -1.83    8.19   0
   5  -6  12   13.18    6.45   0
   5  -5  13   10.78    5.90   0
  -1  -5   7   -0.82    6.41   0
  -1  -4   7  497.90    8.20   0
   1  -9   5    7.05    7.55   0
   2  -9   6   -3.37    8.45   0
   2  -8   8   58.38    9.58   0
   2  -3  12    2.13    6.79   0
   5  -3  14   -0.58    7.90   0
   7  -3  14    0.71    6.15   0
  -1  -7   5  391.69    9.77   0
   0  -6   8    9.11    7.61   0
   2  -5  11   47.57   11.18   0
   3  -9   6    9.04    8.94   0
   3  -7  10    2.88    9.28   0
   3  -6  11   12.44    8.49   0
   3   0  12   -4.13    4.85   0
   4  -9   6   -2.10    6.68   0
   4   0  13    5.06    4.82   0
   5  -1  14   -2.55    5.96   0
  -1  -8   3    8.62    6.57   0
   4  -7  10    1.14    8.22   0
   8  -2  14   -6.17    4.30   0
  -1  -5   6   10.38    5.59   0
   0  -8   5   -5.69    8.11   0
   1  -9   4    3.65    6.17   0
   1  -7   8   42.03    8.70   0
   1  -6   9    3.94    9.24   0
   2  -9   5    2.14    9.09   0
   2  -1  11   27.00    5.61   0
   3  -8   8   -5.81    9.17   0
   3  -4  12    1.25    8.25   0
   4  -5  12   21.14    9.48   0
   5  -8   8   21.88    6.92   0
   5  -7  10   45.22    7.76   0
   7  -5  12    2.53    6.88   0
   7  -4  13    5.06    6.17   0
  -1  -8   2   13.86    5.51   0
  -1  -7   4    0.68    6.18   0
   0  -5   8    2.00    7.13   0
   2  -8   7   19.35   10.23   0
   2  -4  11   22.68    7.80   0
   4  -8   8   14.73    9.07   0
   6  -6  11    5.22    7.39   0
   6  -4  13    6.13    7.27   0
   0  -7   6   41.37    8.05   0
   0  -6   7   24.91    7.81   0
   0  -4   8    0.36    6.66   0
   3  -9   5   26.73    8.04   0
   3  -3  12    8.77    8.00   0
   3  -2  12   -0.68    8.84   0
   4  -9   5    3.03    6.71   0
   5  -6  11   32.86    7.44   0
   5  -5  12   21.60    8.06   0
   6  -5  12    9.28    6.14   0
   7  -1  14   -0.64    6.62   0
   0  -8   4  141.87    8.94   0
   1  -5   9    5.91    8.75   0
   3  -7   9   13.37   10.34   0
   3  -5  11  -12.59    9.57   0
   6  -7   9   39.61    8.67   0
   8  -3  13   -3.28    4.92   0
  -1  -7   3  145.97    6.31   0
   1  -6   8    1.78    9.05   0
   2  -9   4    7.12    7.04   0
   3  -8   7  111.31    9.61   0
   4  -7   9   19.37   11.16   0
   8  -4  12    4.88    5.73   0
   0  -7   5   38.02    7.77   0
   0  -5   7    9.73    6.08   0
   1  -8   5   42.58    8.78   0
   1  -4   9  250.68   11.71   0
   2  -6   9    8.84    9.35   0
   3  -9   4   -1.86    8.50   0
   4  -9   4   21.15    8.04   0
   4  -8   7   -8.25    9.71   0
   4   0  12   12.86    4.72   0
   5  -8   7  -14.42    7.88   0
   5  -7   9   25.14    9.66   0
   5  -2  13   -2.43    8.30   0
   5  -1  13   -0.11    6.61   0
   7  -6  10   -3.62    6.79   0
   7  -3  13    4.84    6.40   0
   0  -8   3   32.48    6.75   0
   0  -6   6    3.06    7.12   0
   1  -3   9    4.51    6.11   0
   2  -9   3   54.48    7.51   0
   3  -4  11    6.23    8.04   0
   4  -6  10    6.95    8.71   0
  -1  -7   2   60.36    4.83   0
   1  -5   8  237.14   10.19   0
   3  -1  11    4.02    6.47   0
   5  -6  10    3.33    9.44   0
   6  -6  10    8.98    8.35   0
   7  -5  11   -6.30    6.92   0
   7  -4  12    1.57    6.66   0
   1  -7   6   10.11    8.02   0
   1  -6   7   52.56    9.08   0
   2  -7   7   13.76    9.00   0
   2  -5   9    8.25    9.13   0
   2  -3  10   97.34    8.20   0
   3  -9   3    7.46    7.62   0
   3  -8   6   18.30    8.70   0
   3  -6   9  125.52   11.10   0
   3  -5  10  122.06   10.46   0
   3  -3  11   46.56    7.87   0
   3  -2  11    5.47    6.59   0
   4  -9   3   52.99    8.64   0
   6  -5  11   12.32    7.82   0
   6  -4  12    0.79    8.07   0
   6  -1  13   17.14    7.16   0
   7  -2  13    4.75    8.64   0
   0  -8   2   22.47    6.50   0
   0  -7   4    6.90    6.84   0
   2  -9   2   79.52    8.11   0
   2  -6   8   -2.95   10.36   0
   4  -8   6   16.40   11.50   0
   4  -7   8    1.40    9.85   0
   5  -8   6    0.76    8.30   0
   6  -7   8    2.76    8.31   0
   8  -1  13    0.83    6.50   0
   0  -6   5    1.11    6.35   0
   1  -4   8   37.32    8.05   0
   4  -4  11    4.33    7.36   0
   5  -7   8    8.74    8.93   0
   5  -3  12   53.02    9.51   0
   6  -8   5   25.46    8.16   0
   7  -7   7   21.82    6.99   0
   7  -6   9    2.34    9.06   0
   8  -5  10    3.71    7.09   0
   8  -3  12    0.86    7.75   0
   2  -4   9   39.25    7.92   0
   3  -9   2   28.71    7.14   0
   3  -4  10   15.34    8.38   0
   4  -9   2   66.45    8.12   0
   4  -5  10   19.44    9.33   0
   5  -2  12   12.01    8.81   0
   5   0  12  105.46    6.08   0
   8  -6   8    4.02    6.63   0
   8  -4  11   -0.21    6.90   0
   9  -2  12   -4.22    5.98   0
   0  -7   3   35.25    6.43   0
   1  -8   3   59.80    8.26   0
   1  -7   5   10.91    8.38   0
   1  -5   7   85.18    7.57   0
   2  -7   6    8.88    8.63   0
   3  -8   5   25.09    8.91   0
   5  -6   9   -3.03    8.18   0
   5  -1  12   33.42    6.95   0
   6  -6   9   22.33    7.91   0
   7  -3  12   52.32    8.46   0
   2  -8   4   -5.63    8.98   0
   2  -3   9  469.96   10.31   0
   3  -6   8   -2.94    9.73   0
   3  -5   9   -4.16    8.88   0
   5  -8   5   26.83    9.61   0
   6  -7   7   14.49    8.03   0
   6  -4  11   -4.47   10.82   0
   7  -5  10   -0.44    7.27   0
   7  -4  11   24.56    7.83   0
   9  -4  10  -13.21    5.41   0
   9  -3  11    2.10    6.39   0
   0  -6   4  120.44    6.23   0
   2  -6   7   -3.62    9.54   0
   3  -2  10   -3.39    6.32   0
   4  -7   7   49.02   10.36   0
   4  -2  11   -5.04    7.32   0
   4  -1  11   64.65    6.27   0
   5  -7   7   15.97    9.04   0
   6  -8   4   49.48    8.84   0
   6  -2  12   10.09    7.79   0
   0  -7   2  287.14    8.19   0
   1  -8   2   33.52    7.40   0
   1  -7   4   -5.96    7.29   0
   4  -4  10   56.60    8.73   0
   6  -1  12   22.56    7.37   0
   6   0  12   55.90    5.95   0
   7  -7   6   17.21    7.68   0
   7  -6   8  -14.59    9.60   0
   2  -8   3   67.73    8.67   0
   2  -7   5   -1.59    8.43   0
   2  -4   8  297.69   10.38   0
   3  -7   6    8.89    9.12   0
   4  -6   8   64.43   10.39   0
   4  -5   9   44.20    9.80   0
   5  -8   4  -14.49    9.95   0
   5  -3  11    8.86    7.99   0
   8  -6   7    3.79    7.55   0
   1  -8   1   -2.72    7.19   0
   1  -6   5    5.34    7.55   0
   4  -8   4   12.60    8.85   0
   6  -8   3    6.24    7.80   0
   6  -6   8   -3.48    9.61   0
   7  -1  12    8.09    7.10   0
   7   0  12   -4.09    6.58   0
   8  -4  10    3.12    6.74   0
   8  -3  11   13.69    8.19   0
   8  -1  12   15.93    6.02   0
  10  -1  11   -8.38    5.66   0
   2  -6   6   20.55    8.52   0
   2  -5   7  113.15    8.92   0
   2  -3   8   30.17    4.99   0
   3  -6   7   -3.80    8.93   0
   3  -5   8   12.08    8.92   0
   4  -3  10  143.10    8.75   0
   5  -4  10    4.35    8.41   0
   5  -2  11    2.94    7.77   0
   6  -7   6    8.85    9.51   0
   9  -2  11   11.73    8.04   0
   2  -8   2    4.84    8.48   0
   3  -3   9  120.88    8.22   0
   5  -7   6   12.62    9.58   0
   6  -5   9   -3.88    8.86   0
   7  -7   5   14.51    8.75   0
   7  -4  10   82.31   10.26   0
   9  -4   9   14.82    7.06   0
   2  -7   4    6.08    8.33   0
   3  -7   5   39.85    9.87   0
   3  -2   9   46.95    6.12   0
   4  -8   3   22.48    8.26   0
   4  -6   7    7.03    8.71   0
   4  -2  10   43.46    6.97   0
   6  -8   2  -14.66    7.51   0
   6  -2  11   25.92    8.16   0
   7  -6   7   10.49    8.14   0
   8  -5   8   15.69    8.98   0
   9  -5   7    9.28    6.91   0
   9  -3  10    2.52    6.67   0
  10  -3   9   16.49    5.22   0
  10  -2  10    5.98    5.53   0
   1  -6   4   29.43    6.57   0
   1  -5   5    2.20    5.65   0
   4  -5   8   14.55    8.56   0
   4  -4   9   44.91    7.94   0
   5  -3  10    7.36    7.19   0
   6  -7   5   33.80   11.42   0
   7  -2  11   40.07   10.26   0
   8  -6   6   15.55    8.34   0
   1  -7   2    2.08    6.97   0
   2  -8   1   17.75    6.67   0
   2  -4   7    7.56    6.90   0
   3  -8   2   11.17    7.74   0
   3  -6   6   -0.36    8.57   0
   6  -8   1   47.55    7.82   0
   6  -6   7   -2.62    8.12   0
   6  -1  11    5.72    7.19   0
   6   0  11   48.95    6.24   0
   7  -7   4    4.95    9.18   0
   9  -1  11    6.06    6.65   0
   2  -5   6   22.13    6.93   0
   4  -8   2   11.20    7.53   0
   5  -8   2   -2.96    8.18   0
   5  -7   5    9.25   10.01   0
   5  -5   8   -2.44    9.33   0
   5  -4   9    6.50    8.96   0
   7  -5   8   13.82    8.65   0
   8  -3  10   57.27    8.41   0
   2  -7   3    9.93    6.91   0
   3  -7   4   47.15    9.19   0
   4  -3   9   82.67    7.87   0
   5  -2  10   -0.56    7.20   0
   6  -8   0   59.16    7.42   0
   6  -4   9  101.57    8.94   0
   7  -6   6    8.15    8.79   0
   8  -6   5    4.90    9.82   0
   9  -4   8    6.32    7.00   0
   9   0  11   -3.58    6.65   0
  10  -1  10   13.80    7.33   0
   1  -6   3   12.71    5.80   0
   3  -8   1    0.71    6.72   0
   3  -3   8  195.73    7.31   0
   4  -6   6   75.04    9.33   0
   5  -1  10   27.26    7.66   0
   5   0  10   30.57    4.90   0
   6  -7   4   19.51    9.18   0
   7  -7   3   29.58    9.07   0
   7   0  11   -7.12    6.33   0
   8  -5   7   33.42    7.95   0
   8   0  11   -0.36    7.35   0
   9  -5   6   11.40    7.78   0
   9  -3   9    8.53    7.46   0
   9  -2  10   -8.23    7.45   0
  10  -3   8   -2.49    6.40   0
   1  -7   1   27.84    6.01   0
   4  -8   1    3.20    7.50   0
   4  -7   4   88.58   11.30   0
   4  -5   7   -7.62    9.52   0
   4  -4   8   41.19    8.17   0
   4  -2   9   16.32    6.51   0
   5  -6   6   58.67    9.74   0
   6  -6   6    9.46    8.41   0
  10  -2   9   17.48    6.67   0
   2  -6   4   47.85    8.18   0
   3  -6   5   81.66    9.51   0
   3  -4   7    3.71    7.13   0
   5  -8   0    9.98    8.41   0
   6  -2  10    4.10    7.87   0
  10  -4   6    4.20    6.52   0
   2  -7   2   55.69    8.08   0
   2  -5   5   22.11    6.28   0
   3  -7   3    4.76    8.06   0
   5  -5   7   84.58    9.54   0
   5  -4   8    1.78    8.68   0
   6  -7   3   10.31   11.32   0
   7  -7   2   -9.90    8.48   0
   7  -6   5   -3.03    9.27   0
   7  -5   7    2.51    8.25   0
   7  -2  10   25.97    8.83   0
   8  -6   4   21.17    9.06   0
   8  -4   8   19.92    9.07   0
   8  -3   9    4.57    9.04   0
   9  -5   5    3.87    9.24   0
   4  -6   5   77.58    9.64   0
   5  -8  -1   14.00    6.13   0
   6  -3   9    3.82    6.85   0
   6  -1  10   17.68    6.90   0
   7  -3   9   -7.12    9.72   0
   8  -5   6   23.43   10.40   0
   9  -4   7   21.35    7.60   0
  11  -2   7   -6.33    5.62   0
   3  -8  -1   19.26    6.56   0
   4  -8  -1  134.43    9.75   0
   4  -3   8    6.67    6.43   0
   5  -6   5   50.10    8.90   0
   5  -2   9   56.81    8.00   0
   6   0  10   21.98    5.96   0
   8  -1  10   21.13    9.43   0
   9  -3   8    6.06    9.64   0
  10  -4   5   23.78    8.70   0
  10  -3   7    6.54    7.28   0
  11  -1   8    3.22    5.01   0
   2  -7   1   27.24    6.45   0
   2  -6   3  410.72    9.99   0
   3  -7   2   -4.86    8.14   0
   3  -6   4   45.37    9.07   0
   4  -5   6  106.82    9.44   0
   4  -4   7  215.87   10.17   0
   8  -6   3   48.49    8.83   0
  10  -1   9   30.22    6.93   0
   4  -2   8    7.42    5.61   0
   5  -1   9   -1.75    5.53   0
   7  -7   0   21.35   10.22   0
   7  -6   4   10.34   10.12   0
   7   0  10   37.72    6.56   0
   8  -4   7    1.04    8.02   0
   8   0  10   10.24    7.61   0
   9  -5   4    5.73    8.20   0
  10  -2   8   16.96    7.30   0
   2  -5   4  441.03   10.25   0
   3  -5   5   29.50    8.02   0
   3  -4   6    3.17    5.88   0
   5  -5   6   64.00   10.42   0
   5  -3   8   44.26    7.95   0
   6  -5   6   89.95   10.13   0
   6  -2   9   35.53    7.53   0
   8  -5   5   -0.91   11.45   0
   4  -6   4  103.85    8.78   0
   5  -4   7    4.34    8.22   0
   7  -7  -2   -3.17    7.81   0
   8  -6   2    7.66    9.28   0
  10  -4   4    8.22    7.93   0
  11  -2   6   46.41    7.11   0
  11   0   8   13.18    6.70   0
   2  -7   0    1.87    5.58   0
   3  -7   1    0.32    7.96   0
   3  -6   3    7.09    8.44   0
   4  -3   7   36.58    6.06   0
   5  -6   4   55.71    9.20   0
   6  -4   7   58.71   10.39   0
   6  -1   9   -7.01    6.53   0
   7  -6   3   19.08    9.81   0
   7  -3   8   32.19    7.95   0
   9  -5   3   10.31    8.64   0
  10  -3   6   23.46    6.96   0
  11  -1   7   25.16    6.06   0
   4  -7   1   36.86   10.06   0
   4  -5   5  231.94   10.43   0
   8  -6   1   14.35   11.28   0
   9  -2   8   11.35    9.10   0
  10  -1   8    3.96    9.47   0
   4  -4   6   35.39    5.22   0
   5  -5   5  167.90    9.82   0
   6   0   9   11.73    5.55   0
   7  -1   9   16.86    6.90   0
   8  -5   4    3.91    9.54   0
   8  -4   6   18.66    8.82   0
   8  -1   9  175.26   10.32   0
   9  -4   5    6.12    9.55   0
  10  -4   3    6.41    7.97   0
  10  -2   7   18.13    8.31   0
   3  -7   0  111.90    8.51   0
   3  -5   4   26.22    7.32   0
   3  -4   5    8.54    5.94   0
   4  -6   3    4.97    9.29   0
   5  -6   3   25.91   10.17   0
   6  -5   5   55.27   10.01   0
   8  -6   0   13.83   10.68   0
   9  -5   2    7.33    9.09   0
   9   0   9   52.30    7.84   0
  11  -2   5   11.18    7.12   0
   5  -4   6  110.48    9.30   0
   5  -3   7   56.46    7.48   0
   5  -1   8    5.76    5.38   0
   6  -7  -1   -1.29    8.93   0
   6  -2   8    8.03    7.94   0
   7  -4   6    7.09    9.56   0
   7  -2   8   -2.04    8.28   0
   7   0   9   45.21    5.95   0
  10  -3   5   31.64    7.90   0
   6  -7  -2   26.58    9.34   0
   6  -3   7   14.09    8.37   0
   7  -3   7    6.17    8.36   0
   9  -5   1    3.34    9.53   0
   9  -3   6   17.25   10.24   0
   9   1   9   11.71    6.09   0
  10  -4   2    5.27    8.28   0
  10   0   8   -4.20    9.17   0
  11  -1   6    4.33    7.09   0
  11   0   7    4.47    7.26   0
   3  -7  -1   20.72    7.25   0
   4  -5   4   41.74    8.79   0
   4  -3   6   34.14    5.61   0
   7  -6   1   10.47    9.83   0
   8  -6  -3   10.40    7.83   0
   8  -6  -2    5.20    9.21   0
   8  -5   3    7.09   10.19   0
   8   1   9    6.04    6.01   0
   9  -4   4   -5.29    9.71   0
   3  -5   3  551.65   12.95   0
   4  -6   2    7.61    8.82   0
   5  -6   2    1.99    9.69   0
   6  -1   8   95.90    7.30   0
   9  -5   0   20.86   10.12   0
  10  -4   1   18.15    8.50   0
  10  -3   4   10.36    8.19   0
  11  -2   4   15.64    7.86   0
   3  -7  -2    8.25    7.94   0
   3  -6   1   38.48    7.63   0
   5  -2   7   40.15    6.64   0
   7  -4   5   62.15   10.50   0
   7  -1   8   19.87    8.41   0
   8  -3   6   18.49    9.55   0
   8  -1   8  105.58    8.80   0
   9  -5  -1    8.55   10.84   0
  11   1   7   32.56    6.18   0
  12   1   5   43.28    5.80   0
   5  -4   5   66.62    8.87   0
   5  -3   6    1.43    5.47   0
   6  -4   5   47.94   10.32   0
   7  -6   0   26.90    9.83   0
   8  -5   2   19.86    9.99   0
   8  -2   7   62.46    9.01   0
   9  -5  -2   35.50    9.37   0
   9  -4   3   -8.21   10.84   0
   9   0   8    1.01    8.59   0
  10  -4   0   20.78    8.40   0
  11  -1   5   19.38    7.77   0
   4  -6   1   10.00    9.35   0
   5  -6   1   37.47   12.20   0
   6  -3   6   65.53    9.01   0
   6  -2   7  181.90    9.72   0
   7  -3   6   10.34    8.39   0
   7  -2   7   -4.80    8.81   0
  10  -4  -1   -2.68    8.24   0
  10  -2   5    5.31    9.28   0
  11  -2   3    4.28    8.28   0
   4  -7  -3   -6.30    8.87   0
   5  -7  -4   18.38    6.13   0
   5  -5   3   15.34    9.46   0
   6  -5   3    4.03   10.31   0
   7   0   8   84.53    7.77   0
   8  -5   1    5.16   10.59   0
   8   0   8   14.82    7.81   0
   9  -1   7   18.15    9.64   0
  10  -3   3   11.21    8.48   0
  10  -1   6    8.63   10.50   0
   3  -5   2   24.88    7.24   0
   4  -4   4    6.50    5.87   0
   9  -4   2   49.22   11.31   0
  11  -2   2   -4.45   10.34   0
   7  -6  -3  242.80   14.08   0
   8  -1   7   11.01    9.00   0
   8   1   8   35.12    6.78   0
  10  -3   2   36.46    8.79   0
  11  -1   4    1.44    7.81   0
  11   1   6   71.54    9.37   0
   4  -6   0   10.77    8.15   0
   5  -6   0   64.39   10.19   0
   5  -4   4    7.81    7.62   0
   5  -2   6   20.02    6.09   0
   6  -1   7  163.24    7.78   0
   7  -6  -4   27.07   11.22   0
   7  -1   7  161.47    9.48   0
   8  -2   6    2.93    8.41   0
  10  -2   4    6.55    9.87   0
  11   0   5   29.88    7.91   0
  12   0   2   18.75    7.19   0
   4  -5   2   69.99    9.23   0
   5  -5   2   33.87    9.21   0
   5  -3   5    0.14    6.72   0
   7  -3   5    5.77    8.91   0
   7  -2   6   52.64    9.29   0
   9  -4   1   70.88   10.89   0
   9   0   7   -4.39    9.31   0
  11  -2   1   15.20    9.05   0
   3  -6  -1   38.32    6.63   0
   8  -5  -1    0.48   10.72   0
   9  -3   3  147.32   13.13   0
  10  -3   1   -4.58    9.47   0
  10  -1   5   16.66   10.86   0
  11  -2   0   66.46    9.27   0
  11  -1   3    4.30   10.03   0
  12   1   3   15.70    7.29   0
  12   2   4   -9.12    5.55   0
   5  -6  -1   -5.01   10.03   0
   8  -5  -2   28.30   11.92   0
   8  -3   4   80.70   11.12   0
   8   0   7    7.23    8.22   0
   9  -4   0   10.43   10.67   0
  11  -2  -1    9.51    8.21   0
   6  -5   1   25.24    8.70   0
   6  -4   3   59.52    9.56   0
   7   0   7   88.01    7.64   0
   8  -5  -3  171.46   12.74   0
   9   1   7   24.73    8.36   0
  10  -3   0   55.86   10.28   0
  11   0   4   10.74    9.20   0
  11   1   5   12.32   10.61   0
   3  -6  -2   43.50    7.63   0
   5  -5   1  244.73   12.78   0
   5  -4   3   55.60    8.09   0
   6  -6  -4   96.02   12.52   0
   7  -3   4   82.78   11.11   0
   8  -2   5   13.20    9.99   0
   8  -1   6   48.67    9.23   0
  10  -3  -1    8.52   10.38   0
  11  -1   2   68.59    8.57   0
  12   1   2   12.35    7.64   0
  12   2   3    1.70    6.77   0
   4  -6  -2   -1.68    8.48   0
   5  -3   4   84.72    7.45   0
   6  -6  -6    4.11    7.44   0
   6  -1   6   10.15    6.61   0
   7  -4   2   48.90   11.46   0
   7  -1   6  148.49   10.19   0
   8   1   7    8.53    6.81   0
   9  -4  -5    0.91    9.66   0
   9  -4  -2   12.09   11.12   0
   9  -3   2   35.53   11.04   0
  10  -3  -4   16.78    9.28   0
  10  -3  -2   59.91   11.29   0
  10   1   6    0.14    9.00   0
   6  -3   4   42.65    9.52   0
   6  -2   5    7.02    7.50   0
   7  -2   5  117.50   10.40   0
   7   1   7    4.49    5.45   0
   8  -3   3   -6.63   11.52   0
   9  -4  -4    2.62   10.82   0
   9  -4  -3   33.52   10.62   0
  10  -3  -3   21.11    9.79   0
  10  -2   2   19.14   11.32   0
  11   2   5    0.54    7.86   0
  12   1   1    4.66    7.87   0
   3  -6  -3   -2.51    7.68   0
   4  -4   2   48.42    6.63   0
   9  -3   1   38.71   13.14   0
  10   2   6    1.15    7.87   0
  11  -1   1   93.93    8.91   0
  11   0   3   44.75   10.24   0
   4  -6  -3   22.94    8.48   0
   5  -5   0   62.63   11.13   0
   5  -4   2   23.45    8.86   0
   8   0   6   -5.86    8.53   0
   9  -2   3   13.64   12.38   0
  10  -2   1   47.01   12.58   0
  12   1   0   20.46    6.77   0
  12   2   2   40.88    6.90   0
   6  -5  -1   80.79   12.22   0
   7  -5  -3   61.34   11.73   0
   7  -4   1    5.71   11.82   0
   7  -3   3  100.23   11.67   0
   8  -3   2  158.07   13.68   0
   8  -1   5   29.19   11.21   0
   9   1   6  140.09   11.21   0
  10  -1   3    7.05   11.94   0
  -6  -7 -14    6.34    5.58   0
  -6  -4 -11    0.40    3.22   0
  -5 -11 -14    7.87    4.53   0
  -4  -5 -13    3.93    4.15   0
  -4  -4 -12    2.93    3.11   0
  -3 -11 -13    7.12    4.14   0
  -3  -7 -14   14.18    4.49   0
  -3  -5 -13  297.32    5.76   0
  -3  -4 -12   60.59    3.88   0
  -2 -11 -12   36.05    3.43   0
  -1  -5 -12  314.15    6.15   0
   0  -5 -11   -1.05    3.93   0
  -9 -10 -12    5.63    3.84   0
  -9  -9 -12    7.16    3.51   0
  -8 -11 -13   54.40    3.70   0
  -8  -8 -13   89.90    4.91   0
  -8  -6 -11    7.71    4.30   0
  -6 -11 -14   41.80    4.17   0
  -5 -12 -13   -3.10    3.73   0
  -2  -6 -13    1.87    4.26   0
  -1  -4 -11  504.87    5.74   0
  -9  -8 -11    8.60    3.90   0
  -8  -7 -12   10.17    4.29   0
  -7 -10 -14   16.64    4.14   0
  -7  -9 -14   10.07    4.71   0
  -7  -5 -11    2.75    3.53   0
  -6 -12 -13    9.50    3.77   0
  -6  -6 -13   32.92    3.73   0
  -6  -5 -12   -2.47    3.84   0
  -4 -10 -14   45.46    4.96   0
  -4  -7 -14    5.55    4.76   0
  -2  -9 -13   25.46    4.30   0
  -1  -9 -12   16.31    3.48   0
  -9 -11 -11    3.82    3.08   0
  -8  -9 -13   -1.11    4.34   0
  -7  -7 -13   -2.02    4.80   0
  -7  -6 -12    6.89    3.83   0
  -6 -10 -14   14.39    4.38   0
  -5 -10 -14    6.67    4.59   0
  -5  -4 -11   41.05    3.75   0
  -3  -6 -13    8.85    3.93   0
  -2  -7 -13    0.52    4.51   0
  -1  -6 -12    8.11    4.02   0
   0  -6 -11   22.93    3.90   0
  -6  -4 -10    7.25    3.31   0
  -5  -9 -14    0.12    4.38   0
  -5  -6 -13    2.78    3.97   0
  -4 -12 -12   12.24    3.28   0
  -4  -6 -13    4.21    4.62   0
  -3 -10 -13    7.63    4.55   0
  -2  -4 -11   17.82    2.59   0
  -1 -10 -11    4.52    3.78   0
  -1  -8 -12   22.06    4.14   0
  -9 -10 -11    3.73    3.83   0
  -9  -9 -11   42.12    3.79   0
  -7 -11 -13    4.47    3.34   0
  -5  -5 -12    6.56    3.65   0
  -4  -4 -11   -5.66    2.76   0
  -3 -12 -11   -2.97    3.13   0
  -3  -5 -12  257.01    4.64   0
  -2 -10 -12    3.20    4.58   0
  -8 -12 -11    8.49    2.61   0
  -8 -11 -12    9.84    3.68   0
  -7 -12 -12   -2.92    3.54   0
  -6 -11 -13   64.40    4.50   0
  -6  -7 -13   16.19    4.36   0
  -5 -12 -12   27.14    4.63   0
  -5 -11 -13   17.35    4.53   0
  -3  -7 -13   12.58    3.73   0
  -3  -4 -11  125.18    3.55   0
  -2 -11 -11    1.39    4.19   0
  -1  -5 -11  108.87    4.07   0
  -9 -11 -10    6.07    3.02   0
  -8 -10 -12  116.93    5.36   0
  -8  -9 -12   19.13    5.30   0
  -7 -10 -13   80.53    4.64   0
  -7  -7 -12   41.40    5.29   0
  -6 -12 -12    5.45    3.82   0
  -6  -6 -12   18.84    3.96   0
  -5  -7 -13  226.56    5.29   0
  -4 -10 -13    1.32    4.51   0
  -3  -8 -13   10.31    4.88   0
  -2  -6 -12   52.37    4.10   0
   0  -5 -10  107.65    3.29   0
  -7  -6 -11   36.11    3.93   0
  -6 -10 -13    4.49    4.40   0
  -6  -8 -13   25.29    4.21   0
  -9  -9 -10   19.89    3.36   0
  -5 -10 -13   -0.85    4.63   0
  -5  -6 -12  125.56    4.49   0
  -4 -12 -11   17.32    4.58   0
  -4  -8 -13   -3.31    4.23   0
  -3  -6 -12   37.69    4.03   0
  -2  -8 -12   -4.44    4.45   0
  -2  -7 -12    6.06    4.19   0
  -2  -5 -11  180.18    4.15   0
  -1  -6 -11    7.78    3.64   0
  -8 -12 -10    6.75    3.08   0
  -8 -11 -11    1.82    3.42   0
  -8  -8 -11   47.28    4.49   0
  -7 -12 -11   -2.61    3.64   0
  -7 -11 -12   19.26    3.88   0
  -7  -8 -12   91.98    4.86   0
  -5  -5 -11    9.56    3.08   0
  -4 -11 -12  131.92    4.85   0
  -4  -6 -12   76.15    4.24   0
  -3 -10 -12   23.54    4.03   0
   0  -8 -10    1.64    3.25   0
   0  -6 -10   85.51    3.61   0
  -9 -11  -9    8.69    2.69   0
  -7 -10 -12   -0.16    4.36   0
  -6  -7 -12   10.22    4.02   0
  -5 -11 -12    3.08    4.27   0
  -4  -5 -11   35.11    3.22   0
  -3 -12 -10   34.50    3.80   0
  -1 -10 -10    6.12    3.88   0
  -1  -8 -11    3.81    4.16   0
  -1  -7 -11   -0.36    3.79   0
   0  -7 -10    3.74    3.56   0
  -9  -9  -9    7.12    3.68   0
  -8 -10 -11   34.42    4.18   0
  -8  -9 -11   45.77    4.46   0
  -7  -7 -11   72.15    4.36   0
  -6 -12 -11   17.29    4.04   0
  -6  -6 -11    0.65    3.62   0
  -5 -12 -11    9.27    4.15   0
  -5  -7 -12    8.63    4.25   0
  -3 -11 -11   14.13    4.63   0
  -3  -7 -12   22.40    3.79   0
  -2 -11 -10   27.13    4.93   0
  -2 -10 -11   21.05    3.95   0
  -1  -5 -10    2.38    2.71   0
  -7  -6 -10   15.26    3.52   0
  -6 -10 -12   37.92    4.27   0
  -4 -10 -12    6.91    4.74   0
  -4  -7 -12    5.10    3.77   0
  -2  -6 -11   20.36    3.80   0
  -9 -11  -8   -2.10    2.56   0
  -8 -12  -9    4.21    2.89   0
  -8 -11 -10   15.30    3.48   0
  -8  -8 -10   -7.07    4.66   0
  -7 -12 -10    7.00    4.34   0
  -7 -11 -11   14.69    3.84   0
  -5 -10 -12   91.95    4.64   0
  -5  -8 -12    8.58    4.16   0
  -4  -9 -12    1.62    4.53   0
  -4  -8 -12    3.88    4.47   0
  -7  -8 -11   19.50    4.37   0
  -5  -9 -12   10.88    4.70   0
  -5  -6 -11   17.37    3.60   0
  -4 -12 -10   -7.22    4.37   0
  -4 -11 -11   41.06    4.64   0
  -3  -6 -11   60.25    3.54   0
  -2 -12  -8    5.14    3.44   0
  -2  -8 -11   34.88    4.39   0
  -2  -7 -11   14.44    3.69   0
  -1  -6 -10   25.02    3.22   0
  -9 -11  -7   14.59    2.84   0
  -9  -9  -8   30.57    2.79   0
  -8 -10 -10   61.29    4.44   0
  -7 -10 -11    7.70    5.06   0
  -6 -12 -10   13.64    3.98   0
  -6 -11 -11   22.62    4.40   0
  -6  -7 -11    2.70    3.55   0
  -5 -12 -10   -2.18    4.54   0
  -5 -11 -11   87.57    4.98   0
  -4  -6 -11   70.59    3.85   0
  -3 -12  -9   -3.75    3.80   0
  -3 -10 -11   38.29    4.47   0
  -2  -5 -10    6.29    1.77   0
  -8 -12  -8    4.59    2.66   0
  -7  -7 -10   10.89    3.74   0
  -7  -6  -9    8.97    3.16   0
  -6 -13  -8    9.12    3.35   0
  -6  -6 -10   11.64    3.46   0
  -5 -13  -8   40.66    3.89   0
  -4  -5 -10    3.53    2.28   0
  -3 -11 -10   32.74    5.32   0
  -3  -7 -11   25.11    3.98   0
  -3  -5 -10   15.29    2.48   0
  -1 -11  -8   -1.08    3.11   0
  -1  -8 -10   35.49    4.24   0
  -1  -7 -10    2.64    3.44   0
   0  -8  -9   -1.13    3.19   0
   0  -7  -9   30.70    4.03   0
   0  -6  -9   11.64    2.88   0
  -8 -11  -9    6.95    3.54   0
  -7 -12  -9   26.55    4.36   0
  -7 -11 -10   17.11    4.12   0
  -6 -10 -11  115.77    4.76   0
  -6  -8 -11  112.11    4.78   0
  -5  -7 -11   30.63    4.00   0
  -4  -7 -11    6.53    3.98   0
  -3  -9 -11    4.48    4.42   0
  -3  -8 -11  165.44    4.24   0
  -2 -11  -9    4.82    4.03   0
  -9 -10  -7    3.76    2.84   0
  -8  -8  -9   18.57    3.92   0
  -8  -7  -8    3.81    3.77   0
  -6  -9 -11   49.00    4.29   0
  -2  -6 -10   14.80    3.27   0
  -8 -12  -7   66.31    2.85   0
  -8 -10  -9   45.61    4.47   0
  -7 -10 -10   -1.54    4.69   0
  -5  -9 -11   72.99    4.47   0
  -5  -8 -11    7.25    4.57   0
  -5  -6 -10   64.95    3.60   0
  -4 -12  -9    9.32    3.98   0
  -4 -11 -10   -3.10    4.42   0
  -4  -9 -11   88.03    4.79   0
  -2  -9 -10    3.90    4.33   0
   0  -9  -8   21.33    3.95   0
  -8 -11  -8    2.10    4.25   0
  -7  -9 -10    5.74    4.82   0
  -6 -13  -7   13.36    3.15   0
  -6 -12  -9  113.81    4.22   0
  -6  -7 -10  150.26    4.39   0
  -5 -13  -7    4.46    3.03   0
  -5 -12  -9    9.33    4.58   0
  -5 -11 -10   39.42    4.63   0
  -5  -5  -9   48.38    2.51   0
  -3 -12  -8    4.58    4.05   0
  -3  -6 -10  554.06    4.98   0
  -2 -12  -7    2.55    3.26   0
  -2  -8 -10    5.98    4.13   0
  -2  -7 -10    1.05    3.70   0
  -7 -12  -8  157.34    4.06   0
  -7 -11  -9   19.20    4.27   0
  -7  -7  -9   22.50    3.56   0
  -6  -6  -9   41.45    3.29   0
  -1 -11  -7    6.13    3.81   0
  -1  -6  -9  322.96    4.25   0
  -8 -12  -6   24.37    3.01   0
  -8  -7  -7    6.78    3.41   0
  -6  -8 -10   80.31    3.97   0
  -5  -7 -10   51.37    3.89   0
  -4 -13  -6   13.13    3.77   0
  -3 -11  -9   53.20    4.38   0
  -3  -9 -10   32.80    5.17   0
  -3  -7 -10    4.22    3.58   0
  -1  -8  -9   26.06    4.01   0
  -1  -7  -9   21.79    4.26   0
   0  -8  -8   47.03    4.61   0
  -8 -10  -8    4.78    3.93   0
  -7  -8  -9   16.89    4.09   0
  -6 -13  -6    2.09    3.24   0
  -6 -12  -8    2.76    4.51   0
  -6  -9 -10   46.23    4.09   0
  -4 -12  -8   64.65    4.41   0
  -4  -7 -10  360.19    5.05   0
  -3  -8 -10   -2.83    4.00   0
   0  -7  -8  171.95    4.31   0
   0  -6  -8   52.41    2.87   0
  -8 -12  -5    7.51    2.66   0
  -8 -11  -7    5.20    3.27   0
  -7  -9  -9   21.61    4.39   0
  -5 -13  -6   17.15    3.82   0
  -5 -12  -8   50.03    4.32   0
  -5  -9 -10    3.24    4.17   0
  -5  -8 -10    1.47    3.82   0
  -4 -11  -9   -0.20    5.13   0
  -4  -9 -10    3.18    4.11   0
  -4  -8 -10   11.97    3.87   0
  -2 -12  -6    4.66    4.35   0
  -8 -12  -4   15.95    2.84   0
  -7 -11  -8   96.24    4.64   0
  -7  -7  -8   33.95    3.69   0
  -6 -13  -5   15.09    3.84   0
  -6  -7  -9  152.86    4.38   0
  -5 -11  -9   19.41    4.11   0
  -5  -6  -9   13.36    2.65   0
  -3 -12  -7  157.61    4.85   0
  -2  -9  -9  103.30    4.83   0
  -1 -12  -4    2.75    3.67   0
  -8 -10  -7   30.95    4.03   0
  -8  -8  -7  101.19    3.73   0
  -4 -13  -5    5.75    3.47   0
  -4  -6  -9  532.56    4.65   0
  -3  -6  -9  233.92    3.70   0
  -2  -8  -9   39.75    4.04   0
  -1  -9  -8    6.26    4.92   0
   0  -9  -7   -2.85    3.59   0
  -8 -11  -6   -0.37    3.64   0
  -6 -12  -7   37.04    4.03   0
  -6  -8  -9    5.74    3.74   0
  -6  -6  -8  127.07    3.25   0
  -5 -13  -5   22.33    3.48   0
  -4 -12  -7   24.88    5.69   0
  -4 -10  -9    3.10    4.60   0
  -3 -11  -8    5.39    4.47   0
  -7  -9  -8    6.74    4.54   0
  -6 -11  -8   38.31    4.16   0
  -5 -12  -7  172.08    4.86   0
  -5 -10  -9   39.01    4.92   0
  -5  -7  -9   26.79    3.64   0
  -3  -9  -9    5.65    3.51   0
  -3  -7  -9    6.34    3.21   0
  -2 -11  -7   -5.10    4.36   0
  -1  -6  -8  597.48    4.83   0
  -8 -11  -5   19.46    3.85   0
  -8 -10  -6   -0.40    3.83   0
  -8  -8  -6    3.77    3.88   0
  -5 -13  -4  145.24    3.93   0
  -5 -11  -8   14.53    4.63   0
  -5  -9  -9   77.53    4.63   0
  -5  -8  -9    1.57    3.62   0
  -4 -13  -4    3.36    3.54   0
  -4 -11  -8   -5.08    4.56   0
  -4  -9  -9   80.06    5.07   0
  -4  -7  -9  144.31    4.22   0
  -3 -12  -6  129.95    4.98   0
  -3  -8  -9   18.77    4.00   0
  -2 -12  -5   14.65    4.18   0
  -1  -8  -8    5.45    3.67   0
  -1  -7  -8   -0.68    3.19   0
   0  -8  -7  151.16    4.19   0
  -8  -9  -6   17.10    3.79   0
  -7 -12  -5   37.88    3.83   0
  -7  -7  -7   44.60    3.31   0
  -6 -12  -6   18.13    4.07   0
  -6  -7  -8    5.85    3.60   0
  -5  -6  -8    4.89    2.83   0
  -4  -8  -9   15.78    4.11   0
  -1 -12  -3   10.37    3.65   0
   0  -7  -7   36.89    3.62   0
  -8 -11  -4   41.72    3.56   0
  -7  -6  -6    7.17    2.41   0
  -6 -10  -8   14.95    4.75   0
  -5 -13  -3   13.35    3.69   0
  -4 -13  -3   18.48    3.48   0
  -4 -12  -6   89.86    4.92   0
  -3 -11  -7    8.42    4.90   0
  -3 -10  -8   66.39    4.82   0
  -2  -9  -8   21.23    4.42   0
  -8 -10  -5   28.42    4.15   0
  -7 -12  -4    6.60    3.76   0
  -7 -11  -6    7.95    4.40   0
  -7  -9  -7   95.60    6.21   0
  -7  -8  -7    1.98    3.52   0
  -6 -11  -7    2.06    4.06   0
  -6  -9  -8   62.68    4.06   0
  -6  -8  -8   12.03    4.08   0
  -6  -6  -7    7.98    2.62   0
  -5 -12  -6   59.30    4.66   0
  -5 -10  -8    1.74    4.75   0
  -4 -10  -8    3.36    4.80   0
  -4  -6  -8  289.31    3.73   0
  -2 -11  -6   -2.90    5.39   0
  -1 -11  -5   12.36    4.35   0
  -1  -9  -7   75.66    4.75   0
  -8 -11  -3  107.02    3.75   0
  -7 -12  -3   -0.38    3.88   0
  -6 -12  -5   12.62    4.00   0
  -5 -11  -7  174.88    5.27   0
  -5  -7  -8   11.74    3.40   0
  -4 -11  -7   18.52    4.41   0
  -3 -12  -5   21.71    5.23   0
  -3  -9  -8    7.39    4.31   0
  -2 -12  -4  105.08    4.77   0
  -2 -10  -7   -1.01    4.65   0
  -2  -7  -8  466.59    5.57   0
  -1 -12  -2   -1.33    3.70   0
  -8 -11  -2    3.65    3.00   0
  -8 -11  -1    8.48    2.84   0
  -5  -9  -8   72.11    5.16   0
  -5  -8  -8   -1.91    4.01   0
  -8 -10  -4   21.73    3.78   0
  -7 -12  -2   15.27    2.98   0
  -7 -12  -1    6.09    2.66   0
  -7 -11  -5   28.05    4.46   0
  -7  -6  -5   -0.14    2.66   0
  -6 -11  -6   19.10    4.40   0
  -6 -10  -7   18.17    4.30   0
  -6  -7  -7   14.42    3.44   0
  -5 -12  -5    5.12    4.29   0
  -4 -12  -5  164.74    5.35   0
  -4  -8  -8   10.37    4.10   0
  -1  -8  -7    2.20    3.96   0
   0  -8  -6    3.32    4.21   0
  -8  -8  -4   25.01    3.25   0
  -7  -9  -6   73.49    4.86   0
  -7  -8  -6  138.93    4.44   0
  -6 -12  -4   -1.51    4.06   0
  -6  -9  -7   16.77    3.83   0
  -6  -8  -7   88.66    4.59   0
  -3 -12  -4   11.01    4.70   0
  -3 -11  -6  122.94    5.56   0
  -3 -10  -7   56.42    4.46   0
  -2  -9  -7   67.91    4.57   0
  -1 -12  -1   -5.78    4.02   0
  -1 -11  -4   25.53    5.29   0
  -8 -10  -3   30.63    3.80   0
  -7 -11  -4  194.53    6.05   0
  -6  -6  -6   21.07    2.75   0
  -5 -11  -6  208.31    5.82   0
  -4 -10  -7    6.66    4.85   0
  -2 -11  -5   23.61    4.73   0
   0 -11  -2    0.67    4.07   0
   0  -7  -6    4.52    3.16   0
  -8 -10  -2  104.05    4.62   0
  -6 -12  -3    5.53    3.74   0
  -5 -12  -4    5.88    4.40   0
  -5  -9  -7   -3.62    4.34   0
  -5  -7  -7    2.49    3.18   0
  -4 -12  -4    2.91    4.73   0
  -2 -10  -6    3.65    5.20   0
  -1 -12   0   19.76    3.95   0
  -1  -9  -6   14.40    4.07   0
   0  -9  -5   28.31    4.16   0
  -8 -10  -1   16.88    3.87   0
  -7  -7  -5   83.13    3.74   0
  -6 -12  -2   29.82    4.83   0
  -5  -8  -7   11.76    4.24   0
  -4  -9  -7   61.21    4.86   0
  -3 -12  -3    2.76    5.52   0
  -3  -9  -7   65.01    4.72   0
  -2 -12  -2   17.16    4.69   0
  -2  -7  -7    7.79    3.46   0
  -1 -10  -5  135.24    5.28   0
  -7 -11  -3   -4.67    4.63   0
  -7  -9  -5   -0.84    4.52   0
  -7  -8  -5   15.10    4.04   0
  -6  -9  -6   -2.00    3.73   0
  -6  -7  -6   47.22    3.74   0
  -5 -12  -3   96.88    4.68   0
  -4  -8  -7    8.48    3.94   0
  -4  -7  -7  306.21    4.44   0
  -3 -10  -6   -1.41    4.68   0
  -3  -8  -7    2.95    4.04   0
  -1 -11  -3    2.83    5.44   0
  -7 -11  -2  103.23    5.47   0
  -6 -12  -1    2.16    4.08   0
  -6 -12   0    9.41    3.62   0
  -6 -12   1  112.00    3.70   0
  -6 -11  -4   46.84    5.49   0
  -6  -8  -6   88.71    4.47   0
  -5 -10  -6  112.26    5.55   0
  -4 -12  -3    3.53    4.81   0
  -4 -10  -6    5.40    5.10   0
  -2 -11  -4   -0.20    4.95   0
  -1  -8  -6    5.95    3.85   0
   0 -11  -1    7.42    4.65   0
  -6 -10  -5   16.86    4.23   0
  -5 -12  -2   -3.48    4.47   0
  -3 -12  -2    0.46    4.74   0
  -2 -12  -1   -1.08    4.61   0
  -2  -9  -6   -1.91    4.53   0
  -1  -7  -6    0.11    2.87   0
   0  -8  -5   13.09    3.35   0
  -7 -11  -1    0.80    3.96   0
  -7 -11   0    8.75    4.46   0
  -7 -11   1    1.89    3.40   0
  -7  -9  -4    9.03    4.52   0
  -7  -7  -4   48.76    3.28   0
  -5  -9  -6  171.89    5.45   0
  -4 -12  -2   18.14    5.11   0
  -2 -10  -5   -5.76    5.22   0
  -1 -10  -4    9.21    6.10   0
  -1  -9  -5   69.44    5.13   0
  -7  -8  -4    6.92    4.11   0
  -6  -9  -5    6.45    4.80   0
  -5 -12  -1   -0.02    4.21   0
  -5 -10  -5   24.53    5.14   0
  -5  -8  -6    2.98    4.07   0
  -5  -7  -6   89.11    3.92   0
  -4  -9  -6   15.53    4.65   0
  -3 -12  -1   25.04    4.54   0
  -3  -9  -6  173.35    4.97   0
  -2 -12   0   41.34    4.68   0
  -1 -11  -2   10.59    4.66   0
   0 -11   0   70.71    5.31   0
   0  -7  -5    5.69    2.74   0
  -6 -10  -4   74.20    5.22   0
  -6  -8  -5   20.01    4.34   0
  -6  -7  -5   29.41    3.20   0
  -5 -12   1    5.36    4.01   0
  -5 -12   2   94.25    3.89   0
  -4 -12  -1    6.10    4.77   0
  -4 -10  -5    7.16    5.11   0
  -3 -10  -5   67.24    4.73   0
  -2 -12   1    4.69    4.75   0
  -2 -11  -3   25.63    5.18   0
  -2  -7  -6    4.98    2.77   0
  -7 -10  -2   58.34    5.02   0
  -7  -9  -3   37.00    4.92   0
  -5 -11  -3   26.04    4.93   0
  -4 -12   0   22.76    4.69   0
  -4  -8  -6  159.09    4.72   0
  -3 -12   0    4.29    4.87   0
  -3  -8  -6    5.62    3.58   0
  -3  -7  -6    0.60    2.97   0
  -2 -12   2   15.92    3.65   0
  -7  -8  -3   19.88    5.14   0
  -7  -7  -3   30.38    3.40   0
  -5  -9  -5  215.40    5.43   0
  -4 -12   1   23.93    4.55   0
  -4 -12   2    4.11    4.63   0
  -3 -12   1   11.77    5.24   0
  -3 -11  -3    5.34    5.20   0
  -2 -10  -4   17.82    4.67   0
  -2  -9  -5    6.89    4.59   0
  -1 -11  -1   -6.01    5.58   0
  -1  -8  -5   61.36    4.12   0
   0 -11   1    3.42    4.15   0
   1  -9  -2    1.65    3.80   0
   1  -8  -3  292.74    5.43   0
  -7 -10  -1   10.45    4.30   0
  -6 -11  -1    7.96    4.68   0
  -6 -10  -3    5.91    5.47   0
  -6  -9  -4   20.74    4.55   0
  -3 -12   2   14.09    4.27   0
  -3  -9  -5   12.49    4.13   0
  -2 -11  -2  171.00    6.18   0
  -1 -10  -3   23.88    4.89   0
  -7 -10   0   -0.62    4.34   0
  -7 -10   3    8.12    2.88   0
  -6 -11   0    7.66    4.39   0
  -6 -11   3    9.04    3.28   0
  -5 -11  -2   14.39    4.53   0
  -5  -8  -5   12.26    3.89   0
  -5  -7  -5    4.08    3.32   0
  -4 -10  -4   10.96    4.70   0
  -4  -9  -5   82.65    4.17   0
  -3 -10  -4  149.33    5.06   0
  -1  -7  -5   89.74    3.19   0
   0 -11   2    3.29    4.14   0
  -7 -10   1    7.23    3.75   0
  -6 -11   1    7.66    3.94   0
  -6 -11   2   73.04    3.99   0
  -6  -8  -4    4.08    4.21   0
  -6  -7  -4   66.12    3.78   0
  -4 -11  -2   70.90    5.00   0
  -3 -11  -2   57.33    5.05   0
  -2  -8  -5  174.73    4.64   0
   0 -11   3   33.30    4.78   0
  -7  -9  -1   40.53    4.40   0
  -7  -8  -2    3.11    3.89   0
  -6  -9  -3   44.06    5.30   0
  -5 -11  -1   73.49    5.46   0
  -5  -9  -4   22.15    4.21   0
  -4  -8  -5   80.73    4.22   0
  -4  -7  -5    5.75    2.75   0
  -2 -11  -1   39.39    5.14   0
  -2 -10  -3    0.16    4.44   0
   0 -11   4   59.48    3.98   0
   0  -7  -4   10.60    2.88   0
   1 -10   1    1.33    3.75   0
  -4 -11  -1   73.94    5.00   0
  -3 -11  -1   14.28    5.55   0
  -2  -9  -4   32.01    4.66   0
  -1 -11   1   12.62    6.11   0
   1  -9  -1    5.12    3.89   0
  -7  -8  -1    8.49    4.48   0
  -5 -11   0  148.41    5.40   0
  -4 -10  -3    5.37    5.19   0
  -4  -9  -4    1.58    4.16   0
  -3 -10  -3    8.29    4.43   0
  -3  -9  -4    1.48    4.00   0
  -1  -9  -3   23.01    5.67   0
  -1  -8  -4  249.28    4.90   0
  -6  -7  -3   32.53    3.34   0
  -5 -11   1    6.74    4.52   0
  -5 -11   2    1.14    5.20   0
  -5 -11   4   46.52    3.75   0
  -5  -7  -4    4.32    3.34   0
  -4 -11   0    4.56    4.41   0
  -1 -11   2   10.62    4.77   0
   0  -9  -2   12.74    4.44   0
   0  -8  -3   -1.32    3.50   0
   1 -10   2   50.46    3.70   0
  -7  -9   2   -0.65    3.52   0
  -6 -10   5   -5.10    3.02   0
  -5  -9  -3    1.24    4.03   0
  -4  -8  -4   56.39    3.81   0
  -2 -10  -2    7.83    4.50   0
  -2  -8  -4   10.81    3.52   0
  -1 -11   3   -0.27    5.54   0
  -1  -7  -4   59.43    3.14   0
  -6 -10   1   14.68    4.34   0
  -6 -10   4   27.46    4.49   0
  -4 -11   5   -6.49    4.20   0
  -4 -10  -2    8.86    5.02   0
  -3 -11   1    3.15    5.06   0
  -3 -11   6   27.28    4.79   0
  -3 -10  -2   29.36    4.66   0
  -2  -9  -3   19.59    4.18   0
  -1 -11   4   96.54    5.01   0
  -1 -11   5   52.71    4.08   0
   1 -10   3   -7.69    3.99   0
   1  -9   0   44.43    4.99   0
  -7  -8   1    8.26    4.35   0
  -6 -10   3    9.47    3.79   0
  -6  -9  -1   72.14    5.00   0
  -6  -8  -2   60.06    3.81   0
  -5 -10  -1    1.07    4.88   0
  -5  -8  -3    4.68    4.03   0
  -4 -11   3    0.85    4.15   0
  -4 -11   4    2.82    3.97   0
  -4  -9  -3   16.19    4.29   0
  -4  -7  -4   69.19    2.86   0
  -3  -9  -3    9.01    4.38   0
  -2 -11   2    9.52    5.01   0
  -2 -11   6    7.96    3.83   0
   0 -10   1  108.54    6.31   0
  -6  -7  -2   38.85    3.31   0
  -5  -9  -2   24.18    4.63   0
  -3 -11   2   45.74    5.17   0
  -3 -11   3   25.31    4.57   0
  -3 -11   5   59.18    4.55   0
  -3  -7  -4  452.36    4.68   0
  -2 -11   3   20.33    5.12   0
  -2 -11   4   13.07    4.53   0
  -2 -11   5   10.59    4.56   0
  -2 -10  -1  210.05    5.23   0
  -1  -9  -2   76.17    4.95   0
  -1  -8  -3  363.13    5.23   0
   0  -9  -1   92.87    4.99   0
   0  -7  -3  206.96    3.82   0
   1 -10   4   27.55    4.47   0
   1 -10   5    4.75    4.87   0
   1  -7  -2  251.99    4.50   0
  -4 -10  -1   68.17    5.36   0
  -3 -11   4   18.09    4.84   0
  -3 -10  -1   -1.74    4.49   0
   0  -8  -2  183.36    5.99   0
   1 -10   6   23.38    3.81   0
   1  -8  -1   -0.63    3.72   0
  -6  -9   6   -0.65    3.76   0
  -6  -8  -1   38.44    3.89   0
  -5 -10   6   35.53    3.83   0
  -4  -9  -2  122.89    4.74   0
  -4  -8  -3   -1.04    3.45   0
  -2  -9  -2  111.94    4.82   0
  -2  -8  -3   85.01    4.10   0
   0 -10   2   10.58    4.40   0
   1  -9   1  377.00    6.39   0
  -6  -9   1    5.92    4.98   0
  -5 -10   2   24.99    6.44   0
  -5 -10   5   50.27    4.73   0
  -5  -9  -1    1.77    3.86   0
  -5  -8  -2    0.70    3.77   0
  -4 -10   0  174.69    5.82   0
  -3  -9  -2    3.03    4.15   0
  -3  -8  -3   45.64    3.91   0
  -2 -10   0  117.63    5.10   0
  -6  -9   5   15.18    4.02   0
  -6  -7  -1  149.50    4.08   0
  -5 -10   3    0.95    4.82   0
  -5 -10   4   18.28    4.14   0
  -4  -7  -3    2.01    2.57   0
  -3 -10   0  121.29    5.70   0
  -1  -9  -1  240.65    5.32   0
   0 -10   3    2.97    5.36   0
   0  -9   0    8.61    4.92   0
   2  -9   4    3.96    3.59   0
  -6  -9   3   14.30    4.59   0
  -6  -9   4   -3.01    4.24   0
  -6  -8   0  243.70    5.03   0
  -5  -9   8   78.43    3.57   0
  -4 -10   7    7.50    3.54   0
   0 -10   4   52.94    6.37   0
   2  -9   5   12.97    4.20   0
  -5  -9   0    2.19    3.99   0
  -4  -8  -2   12.80    3.49   0
  -3 -10   8   36.69    4.10   0
  -2  -9  -1    4.15    4.10   0
   0 -10   5   50.71    5.31   0
   0 -10   6   -4.31    5.67   0
   0 -10   7    7.98    4.43   0
   0  -8  -1   14.46    4.76   0
   0  -7  -2   33.32    3.05   0
   1  -8   0    4.59    3.44   0
   2  -9   8    9.05    3.99   0
  -6  -8   1    4.76    4.65   0
  -6  -7   0    6.60    3.20   0
  -5  -8  -1   35.93    4.20   0
  -4 -10   3   15.26    4.43   0
  -4 -10   6   33.80    3.95   0
  -3  -9  -1   41.01    5.12   0
  -2 -10   8   -0.93    4.28   0
  -2  -8  -2   47.45    3.59   0
  -1 -10   3   -1.07    5.35   0
  -1 -10   8   15.10    3.91   0
   1  -7  -1   37.44    3.20   0
   2  -9   6   -1.68    4.00   0
   2  -9   7   -3.30    4.18   0
  -5  -9   1    1.42    4.91   0
  -5  -9   7    7.26    4.60   0
  -4 -10   4   -4.06    4.97   0
  -4  -9   0    7.74    4.30   0
  -3 -10   7  110.52    4.46   0
  -1 -10   4   20.89    6.27   0
  -1 -10   7    0.32    6.04   0
  -1  -9   0  256.40    5.56   0
   0  -9   1  106.95    5.17   0
   2  -8   2    2.76    3.36   0
  -6  -8   2    3.05    4.47   0
  -6  -8   6   17.21    4.31   0
  -5  -9   2   95.78    5.40   0
  -4  -9   9   40.28    3.30   0
  -4  -7  -2    7.12    2.60   0
  -3 -10   3  141.30    5.52   0
  -3 -10   4   45.51    5.70   0
  -3 -10   6   20.03    4.37   0
  -2 -10   3   19.02    4.79   0
  -2 -10   7   -3.42    4.60   0
  -2  -9   0  315.74    5.86   0
  -1 -10   5   69.98    5.37   0
  -1 -10   6   28.81    5.22   0
  -1  -7  -2  159.47    4.09   0
  -6  -8   3   91.99    4.75   0
  -6  -8   5   -1.05    3.59   0
  -5  -9   6    3.51    4.43   0
  -5  -8   0   15.72    4.14   0
  -5  -8   9    4.82    3.37   0
  -4  -8  -1   48.51    4.11   0
  -3 -10   5   -1.11    5.20   0
  -3  -9   0    0.47    5.06   0
  -3  -9  10    2.78    3.42   0
  -2 -10   4  -10.28    5.29   0
  -2 -10   5   -3.57    5.16   0
  -2 -10   6   -7.90    5.12   0
  -1  -8  -1  159.60    4.66   0
   1  -8   1   -5.63    4.99   0
  -5  -9   5    6.49    5.01   0
  -4  -9   1  152.95    5.69   0
  -3  -8  -1    8.44    3.89   0
  -3  -7  -2    4.53    2.94   0
  -2  -8  -1    5.95    3.79   0
  -1  -9   1   -0.78    4.86   0
   0  -9   2  125.73    5.38   0
   0  -8   0   54.85    4.04   0
   1  -9   4    1.46    4.55   0
   1  -9   9    7.41    5.50   0
   2  -8   3  107.36    5.23   0
  -6  -7   2   40.17    3.59   0
  -5  -8   1   21.46    4.21   0
  -4  -9   8   10.51    3.79   0
  -3  -9   1   78.53    5.43   0
  -2  -9   1   47.97    5.02   0
   0  -7  -1  157.43    3.58   0
   1  -9   5    1.31    4.42   0
  -4  -9   2   36.41    5.03   0
  -4  -8   0    2.95    4.08   0
  -4  -7  -1   67.84    3.42   0
  -2  -9  10   37.62    4.57   0
  -1  -9   2   16.52    4.48   0
   0  -9   3   53.15    5.34   0
   0  -9  10    9.25    4.25   0
   1  -9   6   14.56    4.69   0
   1  -9   7    2.29    5.98   0
   1  -7   0   29.41    3.34   0
  -6  -7   3   17.04    3.91   0
  -5  -8   8    8.62    3.98   0
  -5  -7  10   -0.84    3.10   0
  -4  -9   3   22.46    4.60   0
  -3  -9   2   35.07    5.40   0
  -3  -9   9   82.97    4.72   0
  -1  -9  10   88.26    4.99   0
  -1  -8   0   91.28    4.44   0
   1  -8   2   56.30    4.50   0
   2  -8   4   14.97    4.84   0
  -6  -7   4   13.42    3.62   0
  -4  -9   5   17.48    5.35   0
  -4  -8  10   19.19    3.40   0
  -3  -8   0   24.83    4.29   0
  -3  -7  -1  295.18    4.18   0
  -2  -9   2    1.03    5.28   0
  -2  -8   0    4.96    3.70   0
  -1  -7  -1   91.50    3.06   0
   0  -9   9   24.01    5.46   0
   0  -8   1   67.58    4.98   0
  -5  -8   3   24.41    4.90   0
  -4  -8   1   -0.89    4.26   0
  -3  -9   3    3.85    5.30   0
  -3  -9   8   80.99    5.06   0
  -2  -9   3   85.57    5.09   0
  -2  -9   9   -1.36    5.01   0
  -2  -7  -1   -0.01    2.46   0
  -1  -9   3    4.17    4.11   0
  -1  -9   9   24.02    5.85   0
   0  -9   8   -5.43    6.28   0
  -5  -8   4  133.28    5.47   0
  -5  -8   6   13.11    4.90   0
  -4  -7   0  209.41    4.32   0
  -3  -9   4  111.74    5.54   0
  -3  -9   7    6.14    5.00   0
  -3  -8  11   -3.24    3.66   0
  -1  -9   4    8.51    4.46   0
   0  -9   6   11.58    5.35   0
   0  -9   7   11.20    5.49   0
   0  -7   0    4.55    2.86   0
  -4  -8   2  154.61    5.17   0
  -4  -8   9    8.54    4.06   0
  -3  -9   6   33.51    4.87   0
  -3  -8   1   42.34    4.47   0
  -2  -9   4   53.00    5.63   0
  -2  -9   8   38.76    4.96   0
  -2  -8   1   62.79    4.37   0
  -1  -9   8   11.02    5.09   0
  -1  -8   1   86.47    4.45   0
  -1  -8  12   10.09    5.14   0
   0  -8   2   38.51    4.88   0
   2  -8  10   -0.18    4.71   0
  -5  -7   2    6.77    3.78   0
  -4  -7  11    8.15    3.77   0
  -2  -9   6    4.35    4.94   0
  -2  -9   7   16.10    4.72   0
  -1  -9   6   40.13    5.06   0
  -1  -9   7   10.11    5.41   0
   0  -8  12    5.05    4.43   0
   2  -8   7    5.34    5.57   0
   2  -8   8   38.32    6.05   0
   2  -8   9   -0.04    4.98   0
  -4  -8   3  181.04    5.19   0
  -4  -8   8   27.64    5.07   0
  -4  -7   1  148.90    4.27   0
  -3  -8   2   75.80    4.74   0
  -3  -8  10    5.91    4.00   0
  -3  -7   0  191.61    3.42   0
  -2  -8  11    7.65    5.33   0
  -2  -7   0  189.74    3.94   0
  -1  -7   0   16.29    3.24   0
   1  -8   4   46.77    4.96   0
   1  -8  11    5.51    5.44   0
   2  -7   3    7.42    4.58   0
  -4  -8   4  135.63    4.70   0
  -4  -8   7    3.72    5.17   0
  -2  -8   2  132.38    4.87   0
  -1  -8   2   21.10    4.45   0
   0  -8   3   41.39    4.73   0
  -5  -7   4   -2.24    4.27   0
  -5  -6   2    7.19    3.11   0
  -4  -6  12    9.89    3.49   0
  -3  -8   3   53.62    4.67   0
  -3  -7  12    2.86    3.87   0
  -2  -7  13    1.38    3.74   0
  -1  -8  11   40.99    5.59   0
   0  -8  11    5.80    5.39   0
   0  -7   1    4.63    3.28   0
   1  -8   5   46.77    5.48   0
   1  -8  10   12.19    5.42   0
   1  -7   2    3.44    3.20   0
   2  -7  13    0.03    4.13   0
   3  -7   6   11.89    3.93   0
   3  -7  11   10.18    5.23   0
  -5  -7   6    6.96    4.51   0
  -4  -7   2  140.61    4.55   0
  -4  -7  10   19.91    4.32   0
  -3  -8   9   88.19    5.39   0
  -3  -7   1   40.64    3.14   0
  -2  -8   3    3.81    4.64   0
  -2  -8  10   -7.47    4.62   0
  -1  -8   3    5.62    4.18   0
   0  -8   4  159.03    5.15   0
   1  -8   9   -6.62    6.58   0
  -3  -8   4   27.69    4.63   0
  -2  -7   1  215.50    4.25   0
  -1  -7   1  130.76    3.74   0
   0  -8  10   29.87    5.74   0
   1  -8   8    2.75    4.96   0
   2  -6   2  181.54    3.48   0
   3  -7   8  182.40    5.74   0
   3  -7  10   -4.10    5.13   0
  -4  -7   3   12.03    4.33   0
  -3  -8   5  152.56    5.89   0
  -3  -8   6   50.71    5.50   0
  -2  -8   4  178.95    6.22   0
  -2  -8   9    0.23    5.66   0
  -1  -8   4   15.78    4.52   0
  -1  -8  10    5.38    5.03   0
  -1  -7  13    5.43    5.07   0
   0  -8   5   -2.74    4.66   0
   1  -7  13   13.95    5.95   0
   3  -7   9   15.92    4.34   0
   4  -6  12   -6.50    4.51   0
  -5  -6   4    2.15    3.40   0
  -4  -7   9    2.54    4.90   0
  -3  -7   2  135.07    3.90   0
  -3  -7  11    3.30    4.42   0
  -3  -6  13   12.25    3.62   0
  -2  -8   5  379.16    7.11   0
  -2  -8   8   31.45    5.33   0
  -1  -8   5   56.20    5.16   0
  -1  -8   9   -6.54    4.95   0
   0  -8   6   13.17    5.33   0
   0  -8   8   65.14    5.94   0
   0  -8   9    7.15    5.54   0
   0  -7   2  250.64    5.06   0
   0  -7  13    0.52    6.35   0
   1  -7   3   22.85    4.35   0
   2  -7   5  -13.51    5.57   0
   2  -7  12   18.74    5.79   0
  -5  -6   5   -1.16    3.96   0
  -5  -6   7    3.42    4.44   0
  -4  -7   4  420.29    6.09   0
  -2  -8   6    4.87    5.52   0
  -2  -7   2   50.89    4.01   0
  -2  -7  12   -1.07    4.15   0
  -2  -6  14    0.28    3.24   0
  -1  -8   6   57.43    5.58   0
  -1  -8   8    6.42    5.29   0
  -1  -7   2   49.60    3.68   0
   4  -6  11   -1.85    4.26   0
  -5  -6   6   15.56    4.17   0
  -4  -7   5   80.09    4.81   0
  -4  -7   6    2.79    4.84   0
  -4  -7   7   87.47    5.57   0
  -4  -6   2  374.88    4.43   0
  -3  -7   3  187.72    4.88   0
  -3  -5  14   -3.23    3.59   0
   1  -7   4    0.12    5.26   0
   2  -7   6    6.18    5.06   0
   2  -7  11    6.04    5.78   0
   4  -6  10    5.53    4.69   0
  -3  -7  10   95.41    5.40   0
   1  -7  12   39.10    5.22   0
   2  -7  10    0.61    6.71   0
   2  -6   3  426.33    5.23   0
  -5  -5   4   22.56    2.68   0
  -4  -6   3    1.11    3.26   0
  -4  -6  10   11.29    4.31   0
  -4  -5  12    7.54    3.91   0
  -3  -7   4  447.27    6.33   0
  -3  -6  12    7.37    4.84   0
  -2  -7   3   38.96    4.09   0
  -2  -7  11    4.96    5.04   0
  -1  -7   3  163.44    4.68   0
   0  -7  12    1.69    5.24   0
   2  -7   7    8.81    5.38   0
   2  -7   9   28.92    5.58   0
   3  -6  13   24.21    5.70   0
  -5  -5   5    3.58    3.27   0
  -3  -7   5   26.96    4.83   0
  -1  -6  14   17.30    5.32   0
   0  -7   4    7.88    4.32   0
   1  -7  11   25.85    5.83   0
   2  -6  14    6.33    5.11   0
  -5  -5   6   71.96    3.53   0
  -3  -7   6    1.28    4.41   0
  -3  -7   7   66.13    5.05   0
  -3  -7   8   10.82    5.78   0
  -2  -7   4   17.55    4.46   0
  -2  -6  13    2.10    4.12   0
  -1  -7   4    1.17    4.05   0
   0  -7  11   -2.45    5.94   0
   1  -7   6    7.13    4.99   0
   3  -6   6   -7.34    4.26   0
  -4  -6   8   61.67    6.39   0
   0  -7   5   40.56    4.54   0
   0  -6  14   -0.62    5.54   0
   1  -7   7   -1.28    5.40   0
   1  -7  10    3.39    5.82   0
   1  -6  14   -1.20    5.85   0
   1  -5  16    0.84    5.34   0
   2  -6   4   53.76    3.58   0
   4  -5  14   12.43    4.98   0
  -4  -6   6   21.92    4.62   0
  -4  -6   7    4.21    4.15   0
  -2  -7   8   18.79    5.69   0
  -1  -7   5  430.97    6.43   0
  -1  -7  10   31.76    5.33   0
   0  -7  10   29.83    5.49   0
   1  -7   8   51.62    5.90   0
   1  -6   3   14.35    3.17   0
   3  -6   7    1.82    4.04   0
  -8  -7   1  -10.03    5.34   0
  -8  -6   0  192.94    5.79   0
  -8  -6   9    4.24    4.78   0
  -8  -4  10   10.96    3.60   0
  -7  -7  -1   93.46    5.00   0
  -7  -2   0   24.63    3.32   0
  -6  -9   7    6.53    4.01   0
  -5  -7  -2  173.95    4.16   0
  -8  -7   7   10.71    5.30   0
  -8  -2   8    7.92    4.35   0
  -7  -8   1    5.28    6.27   0
  -8  -7   2   18.53    5.59   0
  -8  -6   1  231.69    6.30   0
  -8  -5   9    3.88    5.73   0
  -8  -4   1   18.76    4.97   0
  -8  -3   2    1.26    4.77   0
  -8  -3   9   16.35    5.16   0
  -8  -2   4   40.17    5.52   0
  -8  -2   5   95.84    6.44   0
  -8  -2   7   21.91    4.66   0
  -7  -6  -1  308.01    5.46   0
  -6  -9   3   19.14    4.03   0
  -6  -9   6    4.94    5.15   0
  -6  -8   0  220.64    5.72   0
  -8  -7   4   21.16    5.22   0
  -8  -7   5   76.97    6.29   0
  -8  -7   6   13.82    5.74   0
  -8  -6   8   -2.01    4.98   0
  -8  -4   9   14.55    4.59   0
  -7  -8   2   -8.49    5.58   0
  -7  -8   7   12.82    5.64   0
  -7  -7   0  121.47    5.45   0
  -7  -2   1  537.97    5.68   0
  -6  -9   5    4.23    4.53   0
  -6  -7  -1  153.36    5.01   0
  -8  -4   2   65.10    5.33   0
  -8  -3   3   87.49    5.23   0
  -8  -3   8  129.53    5.64   0
  -7  -1   3   46.72    3.58   0
  -5  -9   7    9.63    4.74   0
  -5  -8   0   14.90    4.12   0
  -8  -5   8   56.69    5.15   0
  -8  -4   8   24.67    4.96   0
  -7  -8   4   32.61    5.35   0
  -7  -8   5   26.38    5.35   0
  -7  -7   9   10.84    5.50   0
  -7  -6   0   20.60    4.62   0
  -7  -2  11   63.04    4.76   0
  -6  -8   1    7.97    4.95   0
  -6  -8   9   12.77    4.06   0
  -8  -6   6  152.71    5.70   0
  -8  -5   7   56.78    5.98   0
  -8  -4   3   15.78    4.72   0
  -8  -3   5   69.34    6.23   0
  -7  -7   1   21.94    5.23   0
  -7  -6  10   17.94    5.16   0
  -7  -5   0  171.85    4.76   0
  -7  -5  11   19.05    4.71   0
  -7  -4   0   11.23    3.58   0
  -7  -2   2  131.29    4.97   0
  -7  -1   4    4.32    3.45   0
  -7  -1   9   11.95    4.61   0
  -6  -6  -1   34.09    3.90   0
  -5  -9   5    8.96    4.74   0
  -5  -9   6    6.03    4.02   0
  -5  -7  -1   54.59    3.52   0
  -8  -4   5   86.81    5.83   0
  -8  -4   7   48.89    6.24   0
  -7  -7   8   28.94    5.42   0
  -6  -7   0    3.22    4.49   0
  -7  -4  11   18.67    4.31   0
  -7  -1   5  425.24    5.52   0
  -6  -8   2   -0.14    5.20   0
  -5  -8   1   22.66    4.29   0
  -7  -7   7   34.65    5.81   0
  -7  -6   9   39.12    5.25   0
  -7  -4   1   13.13    3.51   0
  -7  -2   3    0.76    4.01   0
  -7  -2  10   -0.42    4.65   0
  -6  -8   3   96.06    5.62   0
  -6  -8   7    1.07    6.73   0
  -6  -7  10    7.42    6.35   0
  -6  -4  13    4.30    4.27   0
  -6  -2  13    1.52    3.98   0
  -7  -7   4   -0.25    4.66   0
  -7  -7   6   87.13    6.35   0
  -7  -6   2    4.90    4.50   0
  -7  -5  10   -8.94    4.71   0
  -6  -8   6   24.48    6.52   0
  -6  -6   0  237.71    5.04   0
  -6  -3  13   17.02    4.67   0
  -5  -7   0    1.60    3.31   0
  -7  -6   8   73.07    6.24   0
  -7  -4  10   37.92    5.02   0
  -7  -3  10   85.33    5.63   0
  -7  -2   4  199.92    5.34   0
  -7  -2   9    3.05    5.23   0
  -6  -8   5   -0.98    5.68   0
  -5  -8   2  310.66    5.44   0
  -7  -6   3   22.18    4.73   0
  -7  -5   9   42.73    5.70   0
  -7  -2   5  243.76    5.31   0
  -6  -7   9   54.52    5.66   0
  -6  -6  11   -6.70    4.94   0
  -6  -5   0  256.63    4.14   0
  -6  -5  12   -5.69    4.99   0
  -7  -6   4   20.95    5.59   0
  -7  -6   7   39.51    5.37   0
  -7  -4   3  213.36    5.46   0
  -7  -3   9   -1.71    5.15   0
  -7  -2   6   23.04    4.29   0
  -7  -2   7    4.93    5.13   0
  -6  -6   1   49.70    4.34   0
  -5  -8   3   23.13    4.73   0
  -5  -7  11    2.32    4.63   0
  -4  -8  10   20.05    4.40   0
  -7  -5   8   18.81    5.23   0
  -6  -7   3   18.98    4.77   0
  -6  -7   8    6.53    5.56   0
  -6  -2  12   17.95    4.39   0
  -5  -8   4  180.58    6.54   0
  -5  -7   1   66.92    3.90   0
  -5  -1  14    8.07    4.00   0
  -7  -5   5   76.87    5.60   0
  -7  -4   4  437.38    6.20   0
  -7  -3   5  109.23    5.31   0
  -7  -3   6   35.66    5.04   0
  -6  -6  10   71.22    5.34   0
  -6  -5   1   82.04    3.56   0
  -6  -4   1   25.03    3.12   0
  -6  -3  12    1.55    4.43   0
  -5  -8   6    8.34    5.05   0
  -5  -8   7   25.84    5.27   0
  -5  -4  14   62.98    4.69   0
  -4  -7  12    4.70    3.98   0
  -6  -7   4   14.93    4.98   0
  -6  -7   5   53.82    5.62   0
  -6  -6   2  177.54    4.71   0
  -6  -5  11   22.27    4.82   0
  -6  -1   4    4.82    2.69   0
  -5  -7  10   -1.63    5.25   0
  -5  -6  12    7.81    5.36   0
  -5  -5  13   26.84    4.88   0
  -4  -8   3  168.50    4.61   0
  -4  -8   9    7.22    4.59   0
  -6  -6   9    3.86    5.74   0
  -5  -7   2    3.85    4.17   0
  -5  -3  14    3.58    4.24   0
  -5  -2  14   58.87    4.52   0
  -4  -7   1  150.20    3.41   0
  -6  -6   3  226.29    5.47   0
  -6  -5   2   42.60    3.14   0
  -6  -5  10    5.81    6.89   0
  -6  -4  11    1.62    5.28   0
  -6  -3   2    3.61    1.64   0
  -6  -2   3   -1.04    2.95   0
  -6  -1   5   40.40    3.54   0
  -5  -6   1    4.51    3.13   0
  -4  -8   4  132.74    4.95   0
  -4  -8   8   22.91    5.35   0
  -4  -6  13   13.86    5.61   0
  -6  -6   4    6.16    4.83   0
  -6  -6   8  223.96    6.20   0
  -6  -1   6  158.45    4.61   0
  -6  -1   9   25.28    4.43   0
  -5  -7   3  346.79    5.73   0
  -5  -7   9   54.21    5.62   0
  -5  -6  11   -5.16    6.29   0
  -4  -8   5   32.42    3.91   0
  -4  -8   7    4.42    4.67   0
  -4  -7  11   11.68    5.28   0
  -3  -8   9   74.97    5.31   0
  -6  -6   6   92.03    5.65   0
  -6  -5   9   77.01    6.66   0
  -6  -4  10    4.53    5.88   0
  -6  -3   3    2.37    2.80   0
  -6  -2   4    2.88    3.36   0
  -6  -1   7   13.87    3.99   0
  -5  -4  13   -2.72    3.99   0
  -5  -1  13   12.81    4.37   0
  -4  -5  14    9.56    4.57   0
  -3  -7  12   10.29    5.11   0
  -5  -6   2    7.13    3.71   0
  -5  -5  12    2.07    4.94   0
  -4  -7   2  153.20    3.91   0
  -4  -3  15   -4.40    5.10   0
  -3  -8   8    0.06    4.72   0
  -6  -3   4   67.62    3.88   0
  -6  -2   9    8.11    5.13   0
  -5  -7   5   63.70    5.15   0
  -5  -7   6    4.91    5.67   0
  -5  -6  10   94.29    6.02   0
  -5  -3  13   21.18    4.94   0
  -5  -2  13    0.53    4.40   0
  -4  -1  15    2.85    4.00   0
  -6  -5   7    9.72    5.11   0
  -6  -4   4   75.67    4.19   0
  -6  -2   6    5.14    4.35   0
  -6  -2   7  152.18    5.35   0
  -6  -2   8   69.94    5.03   0
  -5  -1  12    2.26    5.59   0
  -4  -7   3    8.62    4.41   0
  -4  -6  12   14.32    5.53   0
  -4  -2  15    3.16    4.37   0
  -6  -4   5  563.27    6.40   0
  -6  -4   6  227.91    5.73   0
  -6  -4   7    4.57    4.88   0
  -6  -3   5   34.98    3.05   0
  -6  -3   6  267.42    5.25   0
  -6  -3   7   54.77    4.21   0
  -5  -6   3   16.61    4.36   0
  -5  -6   9  363.19    6.67   0
  -5  -5   2   50.15    3.21   0
  -5   0  10   25.77    4.65   0
  -4  -7   9    4.16    5.80   0
  -4  -5  13   11.81    6.13   0
  -4  -4  14   -5.20    4.43   0
  -4   0  14   -3.15    4.53   0
  -5  -6   4   -2.08    4.31   0
  -5  -3  12    0.44    5.44   0
  -5  -2  12   35.66    5.52   0
  -5   0   9   82.17    5.16   0
  -4  -7   4  387.93    5.86   0
  -3  -6  13   18.94    5.44   0
  -3  -3  16   31.40    4.94   0
  -2  -7  12   -1.47    4.41   0
  -5  -6   5    0.53    4.25   0
  -5  -6   7    2.38    5.09   0
  -5  -6   8   17.82    5.55   0
  -5  -1  11   -1.72    5.36   0
  -5   0   7   88.27    3.41   0
  -5   0   8   11.04    3.42   0
  -4  -7   5   80.92    5.71   0
  -5  -6   6   12.89    4.40   0
  -5  -5   3  364.77    4.63   0
  -5  -4  11   30.13    5.07   0
  -4  -7   6    2.23    4.80   0
  -4  -7   7   83.75    5.62   0
  -4  -3  14   35.76    4.76   0
  -3  -7   3  199.84    3.79   0
  -3  -7  10  105.16    5.90   0
  -3  -5  14    0.38    5.02   0
  -3  -4  15   13.11    5.04   0
  -3  -2  16   76.91    5.66   0
  -3  -1  16   34.61    5.26   0
  -5  -5   4   27.37    3.55   0
  -5  -5   9    7.66    5.32   0
  -5  -1  10    4.34    4.94   0
  -4  -4  13   17.28    6.41   0
  -4  -2  14    5.06    5.12   0
  -4   0  13    3.30    4.49   0
  -2  -5  15    8.90    5.34   0
  -2  -4  16   46.73    6.45   0
  -1  -7  12   14.42    4.31   0
  -5  -5   8   23.27    5.52   0
  -5  -1   9   47.88    5.44   0
  -4  -6   3    4.83    2.76   0
  -3  -6  12    3.19    6.15   0
  -5  -5   5    0.98    3.88   0
  -5  -5   6   99.92    4.64   0
  -5  -5   7   60.36    4.94   0
  -5  -4   4  783.65    5.99   0
  -5  -4   9   19.30    5.34   0
  -5  -1   6   29.38    3.09   0
  -5  -1   7    0.17    3.73   0
  -5  -1   8   26.97    4.12   0
  -2  -2  17   23.68    4.34   0
  -2   0  17    0.95    3.51   0
  -1  -6  14   12.77    5.13   0
  -5  -2   5   20.13    3.11   0
  -4  -6   4   82.79    4.05   0
  -4  -5  11   14.37    5.26   0
  -4  -3  13    1.72    5.64   0
  -4  -1  13    6.65    5.11   0
  -3  -7   7   60.79    5.12   0
  -3  -7   8   12.07    5.28   0
  -3  -5  13   52.06    6.87   0
  -3  -3  15  104.31    5.23   0
  -2  -7  10   -3.18    4.57   0
  -2  -1  17    8.96    3.90   0
  -1  -7  11   -1.38    4.89   0
  -5  -4   7   10.62    4.62   0
  -5  -4   8    6.25    5.38   0
  -5  -3   5  617.82    5.43   0
  -5  -2   6  171.03    4.38   0
  -5  -2   7   81.08    5.30   0
  -5  -2   8   21.65    4.33   0
  -4  -6   5  251.87    5.34   0
  -4  -6   7    4.57    4.50   0
  -4  -6   8   94.08    4.99   0
  -4  -4  12    6.94    5.27   0
  -3  -6  11  106.49    6.16   0
  -3  -4  14  130.35    5.90   0
  -5  -3   6  252.76    4.83   0
  -5  -3   7   55.35    4.46   0
  -5  -3   8   11.11    4.74   0
  -4  -6   6   41.61    4.65   0
  -3  -2  15    8.84    5.27   0
  -2  -5  14    3.03    5.36   0
  -2  -3  16    8.87    5.01   0
  -1  -1  18    0.85    4.01   0
  -1   0  18   25.43    3.81   0
  -4  -1  12    8.40    5.22   0
  -4   0  11    7.42    4.10   0
  -2  -7   5  130.26    3.78   0
  -2  -7   8   12.91    5.21   0
  -2  -4  15    8.92    5.60   0
  -2   1  16   -1.11    4.82   0
  -1  -5  15   14.85    5.92   0
  -1  -3  17   50.83    5.66   0
  -4  -5   9  113.56    5.35   0
  -3  -5  12   87.98    5.29   0
  -3  -3  14   14.01    5.57   0
  -2  -7   6  398.41    5.96   0
  -2  -7   7   11.28    3.91   0
  -1  -6  13    0.37    4.97   0
  -1  -4  16   44.17    6.25   0
  -4  -5   5  158.65    4.16   0
  -4  -5   8   30.25    4.56   0
  -4   0  10  130.61    4.56   0
  -3  -6   4  105.55    3.56   0
  -3  -6   9  118.84    5.91   0
  -3  -4  13   22.94    5.27   0
  -3   0  14    8.10    4.60   0
  -3   1  13   -1.31    4.42   0
  -2  -2  16   14.35    5.07   0
  -4  -5   6  432.80    5.77   0
  -4  -3  11    4.55    5.33   0
  -4  -2  11   28.52    5.23   0
  -4  -1  11  189.17    5.55   0
  -4   0   9  133.63    3.86   0
  -3  -6   5   -1.52    4.46   0
  -3  -6   8   44.75    4.98   0
  -3  -2  14    0.71    5.87   0
  -3  -1  14   -5.31    6.66   0
  -2  -6  11   18.40    5.10   0
  -2  -5  13   17.22    6.74   0
  -2  -1  16    0.59    6.60   0
  -2   0  16   -3.28    5.21   0
  -1  -7   8    6.06    4.63   0
  -4  -4   9   15.91    5.36   0
  -3  -6   6   -0.96    4.47   0
  -2  -3  15   37.96    6.92   0
  -1  -6  12    6.62    6.43   0
  -1  -2  17   23.57    5.19   0
   0  -6  13    6.31    4.90   0
   0  -5  15    8.66    5.41   0
   0  -2  18    9.33    4.80   0
  -4  -4   8   17.84    4.69   0
  -4  -3  10    8.45    4.55   0
  -4  -2  10  268.24    5.91   0
  -4  -1  10    2.01    4.47   0
  -3   1  12  184.04    5.42   0
  -1  -5  14    3.50    5.81   0
  -1   1  17   11.46    4.37   0
  -4  -4   6   65.40    3.78   0
  -4  -4   7  510.66    6.23   0
  -4  -1   9   18.99    4.26   0
  -3   0  13   75.27    5.49   0
  -2   1  15    1.72    3.95   0
  -1  -4  15   20.59    6.94   0
  -1  -3  16   22.18    5.90   0
  -1  -1  17   36.18    5.72   0
   0  -4  16   20.39    6.12   0
   0  -3  17    0.86    6.33   0
   1  -6  13   -6.13    4.82   0
  -4  -1   7  289.43    3.71   0
  -4  -1   8   59.57    3.66   0
  -3  -5   9    1.85    4.35   0
  -3  -1  13   22.01    5.53   0
  -2  -6   9   12.89    5.13   0
  -2  -2  15   23.16    5.97   0
  -1   0  17   18.52    5.26   0
   1  -5  15   -0.59    5.00   0
  -4  -3   7   20.13    3.22   0
  -4  -2   7   93.06    3.77   0
  -4  -2   8    9.24    3.91   0
  -3  -3  12    8.90    5.07   0
  -2  -6   5   -1.97    2.97   0
  -2  -6   8   11.60    4.40   0
  -2  -1  15    2.97    6.47   0
   0  -6  12   29.72    5.12   0
   0  -1  18    1.19    4.30   0
  -3  -5   5  385.15    4.67   0
  -3  -5   6  179.33    4.71   0
  -3  -5   7  188.52    4.58   0
  -3  -5   8   44.91    4.75   0
  -2  -6   6  106.84    4.24   0
  -2  -6   7  169.16    4.81   0
  -2  -5  11   -0.21    5.83   0
  -2  -3  14   89.11    5.94   0
   0  -5  14    0.01    6.06   0
   0   0  18   13.36    3.94   0
   0   1  18    5.65    3.48   0
   1   0  19    2.81    3.62   0
  -3  -4  10   40.81    5.16   0
  -3  -2  12   51.23    4.57   0
  -3   1  10    2.37    2.75   0
  -2   1  14   17.34    4.23   0
  -1  -6  10  106.37    5.90   0
  -1  -2  16    9.69    6.47   0
   1  -6  12   10.70    4.32   0
   1  -4  16   15.15    7.26   0
   1  -2  18   27.09    5.98   0
   1   1  19   43.43    3.56   0
  -3  -3  11   22.07    5.56   0
  -3   0  11  278.84    5.49   0
  -1  -6   9   43.96    6.15   0
  -1  -4  14   18.46    5.99   0
  -1  -3  15    6.11    5.49   0
   0  -6  11   13.94    4.92   0
   0  -2  17   17.71    5.51   0
  -3  -4   9   24.38    3.03   0
  -2  -5  10   -2.72    4.33   0
  -2  -4  12    7.55    5.53   0
  -2   0  14   29.74    5.76   0
  -1  -1  16    0.70    6.37   0
   0  -4  15    9.12    5.99   0
   0  -3  16   43.78    6.40   0
   1  -5  14    3.41    5.24   0
   1  -3  17   16.10    5.51   0
  -3  -4   7   84.54    3.53   0
  -3  -4   8  259.24    4.96   0
  -3  -1  11   71.09    4.63   0
  -3   0  10  102.00    4.11   0
  -1  -6   6   13.97    3.92   0
  -1  -6   7    2.03    3.95   0
  -1  -6   8    0.70    4.28   0
  -1   0  16   25.84    6.46   0
   0  -6  10   15.04    4.47   0
   0  -5  13   38.60    5.30   0
   0   2  17    5.41    4.05   0
   1  -6  11  101.41    4.34   0
   2  -4  16    4.65    6.18   0
   2  -1  19    7.92    4.03   0
  -3  -3   9   73.33    4.43   0
  -3  -2  10   23.07    4.46   0
  -2  -4  11   -1.98    5.39   0
  -2   1  13   53.80    4.66   0
   0  -1  17   12.95    5.68   0
   2  -5  14   63.84    5.66   0
   3  -5  14   21.32    5.35   0
  -3  -1  10  311.85    5.46   0
  -3   0   9    8.25    3.08   0
  -2  -5   8  109.02    4.99   0
  -2  -3  12    4.26    5.47   0
  -2  -2  13    2.79    4.89   0
  -1  -5  11   81.88    5.79   0
  -1  -2  15   15.14    5.29   0
   0  -6   9   21.76    4.25   0
   1  -1  18    0.40    4.18   0
   2  -3  17    2.99    6.60   0
   2  -2  18    2.16    4.95   0
   3  -4  16    1.74    4.82   0
  -3  -3   7  118.00    3.36   0
  -3  -3   8    3.25    2.78   0
  -3  -2   9  161.18    4.62   0
  -3  -1   9  287.55    4.71   0
  -2  -5   6    1.95    3.09   0
  -2   0  13   11.07    4.83   0
   0  -4  14    6.24    6.04   0
   0   0  17    6.28    5.24   0
   1  -5  13   33.02    5.58   0
   2   0  19   -3.41    3.66   0
  -3  -2   8   90.36    3.34   0
  -2  -4  10   12.56    4.81   0
  -2   1  12  127.44    4.44   0
  -1  -5  10    5.55    4.54   0
   0  -6   7   24.08    3.24   0
   0  -3  15    2.43    5.39   0
   0  -2  16   -4.48    6.53   0
   1  -6   9    3.63    4.25   0
   1  -2  17   -3.88    5.04   0
   1   0  18   35.61    4.51   0
   2   2  19   14.50    3.74   0
   3  -1  19    9.15    4.21   0
  -2  -4   9    7.06    4.37   0
  -2  -3  11  107.46    5.75   0
  -2  -2  12  366.97    6.33   0
  -1   2  14    8.07    4.26   0
   2  -5  13    4.58    5.95   0
   2   1  19    3.46    3.51   0
   3  -3  17    4.84    4.82   0
  -1  -5   9   19.67    4.58   0
  -1  -2  14    7.62    5.72   0
   0  -5  11   15.60    5.30   0
   0  -1  16    1.48    6.73   0
   0   2  16    1.23    4.22   0
   2  -4  15   15.48    6.13   0
   3  -5  13   88.96    5.45   0
   3  -2  18   11.66    5.17   0
   4  -3  17    0.87    4.02   0
  -2  -4   8   38.32    4.00   0
  -2  -3  10  108.92    4.89   0
  -2   1  11   -2.36    3.28   0
  -1  -5   8  190.58    5.18   0
  -1  -4  11   48.30    5.22   0
   1  -4  14   -3.26    5.93   0
   2  -1  18   -2.30    4.57   0
   4  -1  19    7.95    3.96   0
  -2  -4   7  224.44    3.95   0
  -1  -5   6    9.54    2.74   0
  -1  -5   7   -3.64    3.46   0
  -1   1  14   38.02    5.12   0
   0   0  16    4.87    6.32   0
   1  -1  17   14.42    5.81   0
   2  -3  16    1.06    5.95   0
   3  -4  15   10.03    5.74   0
   4  -4  15   12.70    4.63   0
   4  -2  18    5.04    4.02   0
  -2  -1  11   42.89    4.33   0
  -2   0  11    6.88    3.88   0
  -2   1  10  254.95    4.07   0
  -1  -3  12   85.03    5.92   0
  -1  -2  13  111.94    6.01   0
  -1   2  13    7.88    3.85   0
   0  -5  10  145.79    5.25   0
   1  -3  15    6.15    5.22   0
   1  -2  16    0.23    5.72   0
   2  -2  17   -6.75    5.33   0
   3   0  19   35.89    5.20   0
  -2  -2  10   52.18    3.99   0
  -1  -4  10  134.07    5.18   0
   1  -5  11   21.99    5.44   0
   1   0  17   65.80    6.15   0
   1   2  17   11.50    4.96   0
   2  -4  14   -4.42    6.14   0
   2   0  18    0.78    4.79   0
   2   3  18    2.58    3.51   0
   3  -5  12    0.72    4.62   0
   3   3  19   -1.35    3.53   0
  -2  -3   8  137.88    3.47   0
  -2  -1  10   21.40    3.79   0
  -2   0  10   34.54    3.49   0
  -1  -1  13   47.69    4.57   0
   0  -5   9    8.50    4.22   0
   0   2  15    8.39    5.25   0
   1   1  17    0.67    5.41   0
   3  -3  16   10.20    6.30   0
   3  -1  18    5.05    5.79   0
   3   1  19    8.44    4.28   0
  -1  -4   9   61.67    3.99   0
  -1  -3  11   27.01    4.18   0
  -1   1  13    6.38    4.47   0
  -1   2  12    8.35    3.57   0
   0  -5   8    8.88    3.65   0
   0  -3  13   26.77    5.09   0
   0  -2  14    4.81    5.60   0
   1  -5  10    5.02    5.28   0
   2   1  18    8.16    4.97   0
   2   2  18    2.31    4.48   0
   3  -4  14   29.26    6.73   0
   3  -2  17    4.22    5.39   0
   3   2  19    7.28    3.41   0
   4  -3  16    0.31    5.93   0
   4   0  19    6.57    5.45   0
   5  -3  16    0.37    5.00   0
  -1  -4   8   47.38    3.95   0
  -1  -2  12   29.53    4.65   0
   0  -5   7   11.43    2.97   0
   0  -4  11   35.10    4.44   0
   0   0  15   -1.10    5.98   0
   1  -1  16    5.35    6.24   0
   2  -3  15   -4.64    6.44   0
   2  -1  17    0.67    6.28   0
   4  -4  14   18.21    5.50   0
   1  -4  12   97.52    6.83   0
   2  -2  16    7.51    5.45   0
   5   2  20    2.10    3.18   0
  -1  -3  10   -3.57    3.74   0
  -1  -1  12  560.00    7.49   0
  -1   1  12    4.09    3.92   0
  -1   2  11   12.91    3.07   0
   0  -3  12    2.93    4.47   0
   0  -1  14   55.55    5.81   0
   1  -5   9    5.67    3.91   0
   2  -5  10   34.74    4.08   0
   3   0  18   -1.08    4.70   0
   4  -2  17   -0.35    4.47   0
   4  -1  18    4.50    4.85   0
   4   4  19    1.61    3.25   0
   5   0  19    9.09    3.98   0
   6  -2  17   18.19    3.73   0
  -1   0  12   -0.52    4.22   0
   0  -2  13   27.39    5.79   0
   1  -5   8  216.97    4.75   0
   2   0  17    6.28    5.79   0
   3  -3  15    4.11    5.78   0
   4   1  19   10.42    4.39   0
   5  -2  17   -0.99    4.77   0
   5  -1  18    3.93    5.97   0
   6  -3  15    8.01    4.20   0
   6   0  19    7.55    3.46   0
  -1  -3   9   56.01    3.33   0
   0   1  14   -2.26    4.63   0
   1  -5   7   50.37    3.69   0
   1  -1  15   35.94    7.60   0
   2  -5   9   10.79    4.67   0
   2   3  17   14.97    3.88   0
   3  -1  17    9.89    5.71   0
   6  -1  18    6.38    4.05   0
  -1  -1  11   13.83    3.82   0
  -1   1  11    8.81    3.13   0
   0  -4   9   11.37    3.94   0
   1  -4  11    2.93    4.58   0
   1  -2  14   64.98    6.26   0
   2  -4  12   65.79    5.54   0
   2   1  17   22.18    5.50   0
   2   2  17   20.17    4.98   0
   3  -2  16    2.71    5.83   0
   3   1  18    3.41    4.66   0
   3   3  18   46.66    4.59   0
   4  -4  13   29.18    4.89   0
   4  -3  15    0.08    5.97   0
   4   2  19    1.28    4.08   0
   4   3  19    5.91    3.49   0
   5  -3  15   11.87    6.35   0
  -1  -3   8  106.17    2.52   0
   0  -1  13  215.01    5.89   0
   1   3  15    6.81    4.25   0
   3   2  18   -1.20    4.85   0
   4   0  18    7.02    4.50   0
   5   1  19   -4.53    4.26   0
   0  -4   8   10.78    3.12   0
   0  -2  12  161.98    5.34   0
   0   2  13   65.71    4.11   0
   1  -4  10   -7.29    4.65   0
   4  -2  16    6.50    5.59   0
  -1  -1  10   16.32    2.94   0
   0  -3  10   30.24    4.11   0
   0   0  13    9.71    4.94   0
   0   1  13   37.16    4.76   0
   1  -3  12    3.13    4.27   0
   1   1  15   52.96    6.43   0
   2  -4  11   19.14    5.19   0
   4  -1  17    0.72    5.20   0
   5  -4  12   -1.50    4.08   0
   6   1  19    7.99    5.14   0
  -1   0  10    6.33    2.75   0
   1  -2  13    2.09    5.54   0
   1  -1  14    0.49    5.82   0
   2  -3  13    6.17    4.31   0
   3   4  17   11.81    4.11   0
   5  -2  16   14.51    5.46   0
   5   0  18    5.63    4.71   0
   5   2  19   -6.98    4.11   0
   5   4  19    0.51    3.08   0
   7  -1  17   32.13    4.65   0
   7   1  19   10.47    3.81   0
   0  -2  11   45.26    4.47   0
   1  -4   9  352.89    5.58   0
   2  -2  14   -2.68    5.61   0
   2  -1  15   19.12    6.18   0
   2   1  16   13.09    6.06   0
   2   3  16   73.22    5.20   0
   4  -3  14   10.34    5.32   0
   4   1  18    1.44    4.70   0
   5  -3  14    0.51    5.58   0
   5  -1  17    9.39    5.14   0
   5   3  19   28.02    4.50   0
   7   0  18   23.32    3.82   0
   0  -3   9   18.26    3.02   0
   0   2  12    4.32    3.19   0
   1  -3  11   56.54    4.69   0
   1   0  14   11.70    4.98   0
   1   3  14   40.43    4.99   0
   2  -4  10   39.17    5.01   0
   2   2  16   12.42    5.19   0
   3  -4  11    0.75    4.60   0
   4   2  18   -0.18    5.24   0
   6  -1  17    7.78    4.73   0
   6   5  19    1.56    2.73   0
   0   1  12  104.74    4.56   0
   1  -4   8   40.24    3.28   0
   2  -3  12   -1.94    4.87   0
   3  -3  13   47.21    6.01   0
   3   3  17   30.97    4.85   0
   4  -4  11   -8.39    4.41   0
   4  -2  15   26.30    5.85   0
   4   3  18   -4.18    4.31   0
   6   2  19    0.08    4.14   0
   7  -2  15    6.22    4.96   0
   0  -2  10   24.27    3.48   0
   0  -1  11   18.10    2.86   0
   1  -1  13   14.98    4.46   0
   1   1  14   -0.81    4.73   0
   1   2  14    4.02    4.77   0
   2   0  15    5.72    5.84   0
   4  -1  16    9.21    5.12   0
   5   1  18    5.89    4.60   0
   7   2  19    0.16    3.89   0
   8  -1  16    1.05    3.48   0
   2  -4   9   35.97    4.11   0
   3  -4  10    7.07    4.21   0
   3  -2  14   52.73    6.11   0
   5  -2  15    9.09    4.93   0
   5   5  18   11.10    3.13   0
   6  -3  13    5.98    3.85   0
   6  -2  15   17.54    5.02   0
   6   3  19   -2.05    3.91   0
   6   4  19    4.81    3.16   0
   0   0  11  329.88    5.24   0
   1   3  13    0.10    4.03   0
   2   1  15   10.54    5.02   0
   2   3  15   17.87    4.77   0
   5   0  17   18.68    5.54   0
   6   1  18   -2.14    4.33   0
   7   5  19    4.14    3.05   0
   0  -1  10  226.06    4.08   0
   0   1  11  121.76    3.79   0
   1  -2  11    0.36    3.58   0
   1   0  13   14.05    4.64   0
   2  -3  11   -1.39    4.22   0
   3  -3  12    9.14    4.87   0
   3   1  16   -0.00    4.82   0
   4   1  17    1.81    4.73   0
   5  -1  16   36.37    5.48   0
   5   2  18   31.77    4.87   0
   6  -1  16   20.74    5.99   0
   7   1  18   -5.52    4.11   0
   7   3  19    5.38    3.81   0
   8   3  19    2.37    3.56   0
   1  -1  12   16.88    4.28   0
   1   1  13   13.84    4.43   0
   1   2  13    2.93    4.07   0
   2  -4   8  303.22    5.07   0
   3  -4   9    7.70    3.32   0
   4  -2  14   -1.67    6.06   0
   4   4  17   19.33    5.01   0
   5   3  18   -0.54    4.73   0
   5   4  18    4.94    4.04   0
   6   0  17    6.12    4.97   0
   7   0  17    1.51    4.47   0
   7   4  19    2.42    3.23   0
   2   0  14    8.39    4.99   0
   3   3  16   30.47    5.15   0
   4  -3  12   11.76    4.91   0
   7  -2  14    1.73    4.32   0
   8   4  19   19.22    3.06   0
   9   0  16    1.22    3.24   0
   2  -1  13    7.35    5.16   0
   3  -2  13   21.06    5.16   0
   3  -1  14   -1.29    5.99   0
   3   0  15    4.92    5.44   0
   5  -3  12   49.37    6.22   0
   5   1  17    7.65    4.31   0
   6  -3  12    0.68    3.45   0
   6  -2  14    4.84    4.62   0
   6   2  18    5.68    4.45   0
   9   1  17    3.47    4.21   0
   1  -2  10   -0.37    2.81   0
   1   0  12   21.66    3.90   0
   1   3  12   81.08    3.55   0
   2   1  14   74.97    5.95   0
   3  -4   8    2.74    2.61   0
   3  -3  11   38.12    4.83   0
   6   5  18   21.88    3.68   0
   7   2  18   13.90    5.00   0
   8   2  18   -2.80    4.80   0
   9  -1  14    2.04    3.10   0
   1  -1  11    1.54    3.38   0
   1   1  12    2.80    4.36   0
   2   2  14    5.35    4.95   0
   2   3  14    5.82    4.27   0
   3   1  15    1.75    4.45   0
   6   3  18   17.46    4.44   0
   6   4  18   13.41    3.97   0
   7   6  18   12.10    2.66   0
   1   2  12   55.80    3.72   0
   2  -3   9  509.07    6.00   0
   2  -2  11  101.37    4.48   0
   2   0  13   29.37    4.80   0
   3   4  15    7.04    3.82   0
   4  -3  11   46.23    4.75   0
   4  -2  13   60.69    5.21   0
   5   2  17    4.74    4.79   0
   6  -1  15    0.21    5.51   0
   6   1  17    8.95    4.66   0
   7  -1  15   -2.13    4.72   0
   8   0  16    2.90    4.18   0
   8   1  17    7.37    3.87   0
   2  -1  12   48.56    4.70   0
   3  -3  10   27.10    3.97   0
   3  -2  12    1.72    4.18   0
   3   0  14    2.79    5.58   0
   3   2  15    4.74    4.42   0
   4  -1  14   47.47    5.53   0
   4   0  15   79.69    5.92   0
   5  -3  11    6.86    5.27   0
   5   3  17    9.00    4.58   0
   5   4  17    0.54    4.92   0
   7  -2  13   17.24    4.38   0
   7   0  16    1.28    4.81   0
   7   1  17   -3.21    4.50   0
   7   3  18    8.17    3.98   0
   9   3  18    1.43    3.84   0
   1  -1  10   -1.88    2.81   0
   1   0  11   13.17    2.82   0
   3  -1  13    9.02    5.25   0
   4   3  16   43.67    4.95   0
   4   4  16   -1.57    3.99   0
   5  -2  13    4.98    5.35   0
   7   4  18   -0.73    3.60   0
   7   5  18    1.01    3.16   0
   8  -2  12   23.93    4.02   0
   8   3  18   22.21    3.82   0
   8   6  18    2.59    2.57   0
   9   0  15   -2.42    4.52   0
   2   1  13   -0.35    4.46   0
   6   2  17   20.83    5.18   0
   8  -1  14    2.90    4.86   0
   9  -1  13    4.61    4.19   0
   1   1  11  125.20    4.00   0
   2  -2  10   62.59    3.37   0
   2   2  13   -4.25    4.34   0
   2   3  13    4.74    3.76   0
   4  -3  10  161.27    5.10   0
   4  -2  12   -3.31    5.15   0
   4   1  15    4.65    4.75   0
   5  -1  14   -4.63    4.52   0
   5   0  15    1.09    4.95   0
   8   4  18    6.62    3.52   0
   8   5  18    2.55    3.29   0
   9   1  16    4.99    4.37   0
   9   2  17   10.44    4.37   0
   9   4  18    5.19    3.54   0
   9   5  18    0.06    3.12   0
   2  -1  11   26.22    3.66   0
   2   0  12    3.38    3.33   0
   3  -3   9  111.59    4.11   0
   3  -2  11    3.06    3.92   0
   3   1  14    5.88    4.18   0
   5  -3  10   13.59    3.77   0
   6   3  17    9.59    4.80   0
   6   5  17    8.97    3.82   0
   7  -1  14    6.05    4.59   0
   7   2  17   11.31    4.91   0
   8   2  17   20.75    4.26   0
  10   3  17    2.96    3.55   0
[truncated: 112,694 more chars]
